# Supplementary material for: Organelle DNA rearrangement mapping reveals U-turn-like inversions as a major source of genomic instability in Arabidopsis and humans
Source: HighWire-hosted journal article supplement (doi:10.1101/gr.188573.114), 2015-03-23
Supplement: Supplemental_Data_File_1.xlsx [file Supplemental_Data_File_1.xlsx]

## Sheet: Col-0
FASTA format	Assigned as rearrangement by BLAST+ analysis
>HWI-ST942:56:C4CFMACXX:7:1101:10189:322061
TATAGCTTCTCATCTGTTATGGCTCCGCCCCTTTTTGCCGATATTTGTGGACAGACTCCCCTTTTTTATATTTTTTAAGA
>HWI-ST942:56:C4CFMACXX:7:1101:10243:206091
AATTCACGTTTGTTTTATTAGTTTAATTGCACTCGGCTCCATCTTTTTTTTTTTTAAAAAAAATGAGCCGGGGGTTTTTTTTTTTTATATTTTTTTTTTT
>HWI-ST942:56:C4CFMACXX:7:1101:10269:556621
CCCACGTTCTACCGAACTGAACTAAGAGCGTTTTTCTTTTTTTTTTTTTTTTAAAAAAGAAAAAGCTAGAAAGAGGGGAATCTTTTAACCGACTCGGTTT
>HWI-ST942:56:C4CFMACXX:7:1101:10272:92321
ATTAGCAGCCGTTTCCAGCTGTTGTTCCCCTCCCAAGGGCAGGTTCTTACGCGTTACTCACCCGTCCGCCACTGGAAACACCACTTCCCGTCCGACTTGC
>HWI-ST942:56:C4CFMACXX:7:1101:10473:718191
TATCTGATAGGTTCCCTAGCAACACTTTTTTTCGTTCTATTACTAATTTCATTGGATCCTGAACCCTCGTTTTTATGACCTTTCCCCCCCCCCCCCCCAC
>HWI-ST942:56:C4CFMACXX:7:1101:10587:192461
ATAATTTTTTTAGTTATGTTACTTATTTAATAAGGTCGATTGGTTTATGCGAATTGATTTTCTGTTACGATA
>HWI-ST942:56:C4CFMACXX:7:1101:10907:90181
AATAATAATAAATAATAAAAAATTACTATATATTTTTTATTAGAAAAAAAATAAGGTGGAATTTGCTACCTTTTTTTATTTTTTATTGAAATTTGTATTT
>HWI-ST942:56:C4CFMACXX:7:1101:11445:341411
ACTCCCATTTCGGCTCTTATACATGCTGCTACTATGGTAGCGGCGGGGAGTTTTTTTTTTTGTTCTCTTTTTTCCCCTTTTTTTTTTTTTTCCTCTTTTT
>HWI-ST942:56:C4CFMACXX:7:1101:11508:30141
AGATGGCCAAGAGTAGATGAATTAGATTTAGTAATTCACGTTTGTTTTATTAGTTTAATTGCACTCGGCTCTCTTCCTTTTTTTTTTATAAAAAAAAG
>HWI-ST942:56:C4CFMACXX:7:1101:11608:429981
CTATAGAATCTGACCCATTTTCTCATTGAGCGAAGGGGTACGAAATAAATTCAATCAGATTTATTTTTGATCAAAAAAAAAAAAAAAAACAACTATGT
>HWI-ST942:56:C4CFMACXX:7:1101:11641:314501
CTGAGGAGCAAAAGGAGGAATCCGCCCGAGGAGGGGCTCGCGTCTGATTAGCTAATTGGTGCGGCAATAGCA
>HWI-ST942:56:C4CFMACXX:7:1101:11824:469271
AAAAGTCGTTTGTTTTGCTAATCTTCTTATACTTTCAATTAAAGATGTTTTAAAAAAAATATCTATAAACACGCGAATATATGACCTATTATATACAAAT
>HWI-ST942:56:C4CFMACXX:7:1101:12195:724761
AGGGACGTTGGGTATATTAGCGGGCCTATTCCATCTTAGTGTTCGTCCGCCTCAACGTCTATACAAAGGATTACGTATGGGCAATATTGAAACCGTCCTT
>HWI-ST942:56:C4CFMACXX:7:1101:12367:938521
TAAAGTGGCTCCTAAGAGTACTGTTATTATACCTATCAAAGATATTATATACATTATAGAAGGGATAACGATAAAAAGAGGAAGAAGACGAGCTACAA
>HWI-ST942:56:C4CFMACXX:7:1101:12372:910971
AACTTCCCAACCATCGATAAATTAGATGGCCAAGAGTAGATGAATTAGATTTAGTAATTCACGTTTGTTTTATTAGTTTAATTGCACTCGGCTCCACATT
>HWI-ST942:56:C4CFMACXX:7:1101:1275:843821
GATGCCATGGAGGGCCCTACTCCCATTTCGGCTCTTATACATGCTGCTACTATGGTAGCGGCGGGGAGTTTTTTTTTTTCTCCTCTTCTTTTTTTTTTTT
>HWI-ST942:56:C4CFMACXX:7:1101:12785:819381
ACTTATGGGAAAGCGATAGAGAAAGAGAAAAAAAAAAACGAAGATTTCACATAGTGATTTTTTTTTTTTTTTTTTATTAAAAAAAAAATTTATTTAATTT
>HWI-ST942:56:C4CFMACXX:7:1101:12890:376771
AAGAGAGAGATGGGGTTTCTCTCGCTTTTGGCTTGGCATAGCGGGCCCCCAGCAGGAGGCCCGCACGACGGGCTATTAGCTCAGTGGTAGAGCGCGCCCC
>HWI-ST942:56:C4CFMACXX:7:1101:12909:839041
ATCAGAGTAATTATGCTGGAATTGAGTCGTATAGCTTCTCATCTGTTATGGCTCTGCCCCTTTATGGGAAGAAATATGGAACACTGATCCTTTTTTTATA
>HWI-ST942:56:C4CFMACXX:7:1101:12973:725041
ATGTATGGTTACCTGATGCCATGGAGGGCCCTACTCCCATTTCGGCTCTTATACATGCTGCTACTATGGTAGCGGCGGGGGGTTTTTTTTTTTCTCTTCT
>HWI-ST942:56:C4CFMACXX:7:1101:13737:65991
CTCTATTCCTTGATAATCGAAGCCCAACGATCTATGAACCAGCCCGCGGTTTGGTAGCCCAAACGGCAAAAGGCCCCGCCTTTTTTTTTTTTTCCCC
>HWI-ST942:56:C4CFMACXX:7:1101:13882:455961
CAAATTAATAAGTGAGTTGGAAGAATTGGAAGGCGAAAATGAAGAAAATGTACCAATGGAGCCTGGAATTCGTTCAAGAAAAGCAAAACGTGTAGTGGTT
>HWI-ST942:56:C4CFMACXX:7:1101:1390:432721
ACTACTGAGTCTAATGCGTTCCTTTCATTTAAGACGAGAAATTGAAATCTTTTTTTTTTTTTTAATAGAAAAATTTTTTTAAAATTAAAAATTTTAACAA
>HWI-ST942:56:C4CFMACXX:7:1101:13912:821321
AGTTCGTTTACCGAATACTTGATACAATAATAAAAAAAAAAAAAAAAAAAAAACCAATGAAAAAAATTATAAATCCAATAAATTTCCCATAATTTATCCA
>HWI-ST942:56:C4CFMACXX:7:1101:14021:193231
TATTCTTGCGCCAAAGATCTTCCTATTTCCAAAGGAACTGGAGTTACATCTCTTTTCCATTTCCATTCAAGAGTTCTTATGTGTTTCCACGCCCCTTTAA
>HWI-ST942:56:C4CFMACXX:7:1101:14157:524521
TGCTCCGCTATTCTGCCCAAGCCTGGCTGAGGAAGAGTTACGGGGCTCCAAAAAAAATCTGGATCGGCCGGTTTAAAAATCCTATATGAAA
>HWI-ST942:56:C4CFMACXX:7:1101:14373:204381
CGTTAGTCAAAATGATTAATTTGAATAAAATTTTACTATCAAAAAAAAAAAAAAGATTTCAATTTCTCGTCTTAAATGAAAGGAACCAATTAAACCCA
>HWI-ST942:56:C4CFMACXX:7:1101:14701:654451
GCTGAGAGCCCTCACAGCCCAGGCACAACGACGCAATTATCAGGGGCGCGCTCTACCACTGAGCTAATAGCCCGTCGTCTGGGGCTCCGCCTCCGCGGCC
>HWI-ST942:56:C4CFMACXX:7:1101:14740:142231
GGATATTGGTAAGGAATTGGAATGTAATAATATCGATTCATAATGGATTCATATCGATACAGAAGAAAAGGTTCTCTATCGATTCAACAAGTGCTGTACT
>HWI-ST942:56:C4CFMACXX:7:1101:14783:784521
ATGTGGCTGAGAGCCCTCACAGCCCAGGCACAACGACGCAATTATCAGGGGCGCGCTCTACCACTGAGCTAATAGCCCGTCGTCATCGGCCCCCTGCGCC
>HWI-ST942:56:C4CFMACXX:7:1101:15181:479371
GTATTTGTATATGTAACTTCCGTCCCCCCGCTTTCAAAATTAGAATTTTAATATTGTCGACTAGAACGATCTTATCGATTCCATTTGAAAACGTAAAGGC
>HWI-ST942:56:C4CFMACXX:7:1101:15324:212081
CATGCATTACGATAGGAACTCCCAATTCTCTGGCAAATACAGCTAGATCGGAAAGAGCACACGTCTGAACTCCAGTCACATGTCAGAATCTCGTATGCCC
>HWI-ST942:56:C4CFMACXX:7:1101:15325:247731
AGAGAACCTCTTATTATTTGAGCAAATAGGAAGCTATCCCAAGTTTCTGCAATTTCTATCCGTCTTGTTTCTTCTCTTTTTGATTGTTCTTCTTCTTTTT
>HWI-ST942:56:C4CFMACXX:7:1101:15413:910591
CCCTAGCATTTTTTTTTTTTAAGTTGAAAAAATTTAAAATTCGAATTTTTCTCCGCCGTTTAGGGGATAGAATTTTTTAAGGGACAAAGAAATCATAATA
>HWI-ST942:56:C4CFMACXX:7:1101:15583:844221
CTTCTTTTTTATCAATTTTTTTTTTCCAAATGAAATTTTTAATAATTTTTTTTTTTTTCCCCCCAATATTAAAACAAAAAAAAAAAAATTTTTTTTTTTT
>HWI-ST942:56:C4CFMACXX:7:1101:15588:365191
GATAGAGAAAGAGAAAAAAAAAAACGAAGATTTCACATAGTGATTTTTTTTTTTTTTTTTTTAAAAAAAAAAATTTATTAAATTTATTTTCTATCCCTTC
>HWI-ST942:56:C4CFMACXX:7:1101:15767:506121
TCTCGCTTTTGGCTTGGCATAGCGGGCCCCCAGCAGGAGGCCCGCACGACGGGCTATTAGCTCAGTGGTAGAGCGCGCCCCTGATAATTGCGTCGTTGT
>HWI-ST942:56:C4CFMACXX:7:1101:15848:346711
CGATAGAGAAAGAGAAAAAAAAAAACGAAGATTTCACATAGTGATTTTTTTTTTTTTTTTTTAAAAAAAAAATTTTTTTTAATTTTTTTTTTCCCCCTTC
>HWI-ST942:56:C4CFMACXX:7:1101:15921:311911
GCCATGGAGGGCCCTACTCCCATTTCGGCTCTTATACATGCTGCTACTATGGTAGCGGCGGGGGATTTTTTTTTTTGTCTTCCTCTTCCTCTTTTTTTCT
>HWI-ST942:56:C4CFMACXX:7:1101:16152:325911
GAACTAGCTGCTGCTTGTGAAGTATGGAAAGAGATCACATTTAACTTCCCAACCATCGATAAATTAGATGGCCAAGAGTAGATGAATTAGATTTAGTAAT
>HWI-ST942:56:C4CFMACXX:7:1101:16313:317131
CTTTTCCATTCACTCGGATTTCTTCCATTTCATCGATTTTGTCCAGATCTTCCCCTTCTTCCGAAAAAAGAGAAGGAAAAGGAGCTTCTTCGGTGGATAC
>HWI-ST942:56:C4CFMACXX:7:1101:16371:512841	Yes
CAATGGAATTCATAGGTATAGGAAGAAGCCCTTTCATTGAAAGGGCTTCTTCCTATACCTATGAATTCCATTGGACCCAGAAATGATA
>HWI-ST942:56:C4CFMACXX:7:1101:1645:619101
GGCTCAGGATTGCCCATTGTTAATTCCAGGGTTTCTCTGAATTTGAAAGTTATCACTTAGTAGGTTTCCATACCAAGGCTCAATCCAATTAAGTCCGTA
>HWI-ST942:56:C4CFMACXX:7:1101:16831:843351
GAGTCTGACTCATAGTGATCATTTATCAAAGAATGACTCTGGTTATCAAATGATTGAACAACCGGGAACAATTTACTTACGA
>HWI-ST942:56:C4CFMACXX:7:1101:16911:561811
ATTCAATCAAATTTAATTGAATGAACGGAAAAAATCATAACATACACAAAGTTTTCTTTGGTCTTTAATAATTTAGAACATTTTTTATTGACGAGCCACA
>HWI-ST942:56:C4CFMACXX:7:1101:16972:860041
TCTAATTGGTCAATAAAAATATATTGAAAGGCTAGTTCTTTTGTTTTTTTTTTTTTTTTTTTGGTTTAACAAATGGTTTATAAAAAGGAAAAAAGGGAAA
>HWI-ST942:56:C4CFMACXX:7:1101:17211:820091
CTTGTGGACACAACACTACAATAACAAAATTGTAGTTGTGTTTAATCTTCTTTTTTTTATTGAAGAGTTTTTTTTCTATCTAAATTTAAGTATGTATCTA
>HWI-ST942:56:C4CFMACXX:7:1101:17246:292821
TTACCCGAATCCTCTGCCATAATGGTACAGAACTATAGTATCATTGGAGTGGATACACGACTCACTTAGATCGGAAAGAGCACACGTCTGAACTCCAGTC
>HWI-ST942:56:C4CFMACXX:7:1101:17366:201791
AAATATTTTTTCCATAAAAAGCATTCATAACATTCGTACTCTCGTAACTCAAGTTAAACAACTCTCAAATATCTCACCGGAGAATCCTTAAGTACTTTTT
>HWI-ST942:56:C4CFMACXX:7:1101:17578:123491
ACACAACTTTTTTTTGAATCAACAAAAAAAATTCTTGATAAATATATTTACAAGAATGAAGAAAATGGAGAAAAAAAAAAAAAAAAACCTTTTTTTTTTT
>HWI-ST942:56:C4CFMACXX:7:1101:17596:190641
TAAGAGATTATCTATGGTTAAACTCTTCACAACTTATCAATGGATATAACCCGTTTGGTATGAATAAGATCGGAAGGCACACGTCTGAACTCCAGTCACA
>HWI-ST942:56:C4CFMACXX:7:1101:17715:882901
CTTAAGTCCCATAAGTTTGATCCTATAGAATCTGACCCATTTTCTCATTGAGCGAAGGGGTACGAAATAAATTCAATCAGATTTATTTTT
>HWI-ST942:56:C4CFMACXX:7:1101:17956:673171
TTACGCCCCCATGTCCCTCTCGTGTGGCGGCAGGGAGGCGTAAAAAGGAAAGAGAGAGATGGGGTTTCTCTCGCTTTTGGCTTGGCCTAGCGGGCCCCCC
>HWI-ST942:56:C4CFMACXX:7:1101:18002:482251
AATCATAGCCTCTACCAAGACATTAACCGCTGAAGCAGAAAGCTTTTTGAAAGAAGGTATTCAAGA
>HWI-ST942:56:C4CFMACXX:7:1101:18080:267311
AAAAAAAAACGAAGATTTCACATAGTGATTTTTTTTTTTTTTTTTTAAAAAAAAAAAATTTCTTTGAATTTATTTTGTACCCCTTCTCCA
>HWI-ST942:56:C4CFMACXX:7:1101:18112:639291
TTCCAGATGCATTAACATTTCCCTTTTTTTCATTCTAGTTATTAACATCAGAAAGGGGTGAAAAATTTAGAGATACAATCAACAATCGGGGACTAACCCC
>HWI-ST942:56:C4CFMACXX:7:1101:18186:618691
CTACTCCCATTTCGGCTCTTATACATGCTGCTACTATGGTAGCGGCGGGGGGTTTTTTTTTTTTTCCTCTTCTTTCTTCTTTTTTTTTTTTTCCCTCTCT
>HWI-ST942:56:C4CFMACXX:7:1101:18201:193161
GACTCATGAAAAAATTGATAATAACACGCAAGAAAAAAATGCCTTCCCATACCCGTATTAGGCACTAATCTATTTTTAACATTTAATTAGTTGGGGTAAT
>HWI-ST942:56:C4CFMACXX:7:1101:18413:836231
TGGAATCTGGGTTCTTCTACTTCATTTTGATTTACTTATTTTTTCTTTATTTTCTCTCTCTTTTCTTTATTTGATTTCTTTTTTGATTTTATTCCCTTCC
>HWI-ST942:56:C4CFMACXX:7:1101:18759:781511
ATTCATAGGTCTGAGATCCACATCTATGAATTGAAAGGTCCGAACGATCAACAGATCGGAGAGCACACGTCTGAACTCCAGTCACATGTCAGAATCTCGT
>HWI-ST942:56:C4CFMACXX:7:1101:19385:172131
ATAAAATAGTTAATCGTGGGGTTACCATTCTCTCTTTTTTTTTCGTTATCTCGCATGTGGTCCTAAGAAAAGGGAATTTGTCGATTTTTCGGGGTCTTAA
>HWI-ST942:56:C4CFMACXX:7:1101:19525:384741
CAAAAAATCCAGTAAGACTTTACCATACTCATCTTACTTAGTATTAGATAGATTGAATTTTGGTTGAATTTAATTAGATTTCTTTTTTTATTTTTAAACA
>HWI-ST942:56:C4CFMACXX:7:1101:19627:217971
GGTTACCTGATGCCATGGAGGGCCCTACTCCCATTTCGGCTCTTATACATGCTGCTACTATGGTAGCGGCGGGGGGTTTTTTTTTTGCTTTTCTTTTTTC
>HWI-ST942:56:C4CFMACXX:7:1101:19726:127061
ATTATGATTTCTTTTTCCGCCTTTGTATTAAGCTTCTCTATTTTTCTTAATAAATGCTTTGCTACAAAAGGGTTTTTTTTAGTGAACGTGTCACAGTTAA
>HWI-ST942:56:C4CFMACXX:7:1101:19737:457051
TTCATTATATTCCATCCATATCCCAATTCCATTCATTTAATATCCCTTTGGTGTCATTGACATAAGAGATGTCGTTTCTAGTCTATCTCTTTCTATTTCT
>HWI-ST942:56:C4CFMACXX:7:1101:19766:927171
GCCTAACTTAAAAACCAATTTGTTTAAATACATCTAAAAAAATAAGAAGCAAAAGGAGAAAAAAAAAAAATAATTAGATAAAATATAAAAAAAATAAAG
>HWI-ST942:56:C4CFMACXX:7:1101:19832:774801
CAGCCCAGGCACAACGACGCAATTATCAGGGGCGCGCTCTACCACTGAGCTAATAGCCCGTCGTGGCGGCGCGCCCCCCCGGGGCCGCCCCCCCCCTGGC
>HWI-ST942:56:C4CFMACXX:7:1101:19876:608471
GAATGACATAAAAAAATAAGGGGATTGGAAGAAATCCACGAAAATATTTGAAATAGAGTTCTAAGGAGAATGAGCTCGGGGAAGGTAGAGTAGAAATTA
>HWI-ST942:56:C4CFMACXX:7:1101:19893:105371
TTAAGTGAAAGGAATGCCTTAAAATTCATACGGGATTTATTTGTCTATGTATTGTTCCATTCGATCTTTTAGGTCCTGCGTCACCTCGATGGTTATGCCA
>HWI-ST942:56:C4CFMACXX:7:1101:19953:542431
TTTCATCTTTGGCTTAAATTTTCAGAAATAGTCGAACGGTCGATTCTTTTTTTTTTTTTTTTTTTCATAAAAAAAATTTTTTTTTTTTTTTTATTAAAAC
>HWI-ST942:56:C4CFMACXX:7:1101:19994:101951
AGATGAATTAGATTTAGTAATTCACGTTTGTTTTATTAGTTTAATTGCACTCGGATTTAATTTTTTTTTTTTACTAAAAAGTGAGTCCTGGCCATATCTT
>HWI-ST942:56:C4CFMACXX:7:1101:20022:362891
ATTGGTATATCAAATTCATTTCTTCTTTTTTTCTCATATCAGATAACAAAGATATAATTAAAAAATTTACTTTTTTTTTTTTTTTTTTTTCTTTCATTTT
>HWI-ST942:56:C4CFMACXX:7:1101:20270:256361
AGGTTCATATTAAAAAGTCTTCTTTGTTTCTTTCAATTCAATCTAAATTTTTCTGGCTCGGGTATACTATCCAGTCCAGCCAGAAAAATTTATTTATCAT
>HWI-ST942:56:C4CFMACXX:7:1101:20583:307951
ATGATTTCTGTTTCGTCTTTTCTTTCCTTTTCGTTTGTTTCGAGAAAGAGATCGATCAATTCCGAGTTTTTCTTTTTCTATTTATTTTTTTTGTTTCGA
>HWI-ST942:56:C4CFMACXX:7:1101:2097:546301
TTAAGTATGTATCTATCAAAAAAAATAGTATATACAACAGATAACCTCGGCTCCAATTTTTTTTTTAAAAAAAAAAATGAGACGAAGGGCATTTAGCTAA
>HWI-ST942:56:C4CFMACXX:7:1101:21023:984791
ATATAATTACAGATGTACATGTAATTAAGAAGTTCTTGTATTTGTATATGTAACTTCCGTCCCCCCGCTTTCAAAATTAGAATTTTAATATTGTCGACTA
>HWI-ST942:56:C4CFMACXX:7:1101:21120:928371
ACTATAGTATCATTGGAGTGGATACACGACTCACTTTAAATATAAGAAGCCAAGTCGGCGGGTTGATCCGAGTAGAGAAAAAAAAAAAAAAGTTAAAACA
>HWI-ST942:56:C4CFMACXX:7:1101:21122:111181
ATTTATTAGTAATTAAATAAAAAAAATAAGTAATACAATGATTTATGATTTTGTGAAAACTATATTTAAAATCTTTGTACAGTAGTTTTTTTAAGTATCT
>HWI-ST942:56:C4CFMACXX:7:1101:2112:663741
AAAGAAAAATTTCGATCAAATCACACATCGCAGTATACTAGGCCTTCTAATTCTTTAAGAGGTTTATCTAAAAGTTTCCCAATATAATACGAAGGCCGTT
>HWI-ST942:56:C4CFMACXX:7:1101:2220:963081
ATTTGCAATTCAATATGGTTATATATTACATAACATATATATGTTCTTTTTTTTTTCATCTTTGGCTTAAATTTTCAGAAATAGTCGAACGGTCGATTCT
>HWI-ST942:56:C4CFMACXX:7:1101:2330:142671
TTACTAATTTCATTGGATCCTGAACCCTCGTTTTTATGACCTTTCCCCCCCCCCCCCCCCGCCACACCCCCCTCCTCCACCACCCTTCTTTTTTTTTTAT
>HWI-ST942:56:C4CFMACXX:7:1101:2516:688361
TAGGTTCTTTCATTTAGGGAAAAGAGGATAAAATTTAGGAAATAGAAATGATCCAGATTTAGTATGGAGATCGGAAGAGCACACCGTCTGAACTCCAGTC
>HWI-ST942:56:C4CFMACXX:7:1101:2554:136671
CTTTGGGCTTTTCCTGCGCAGCTTAGGTGGAAGGCGAAGAAGGCCCCCTTCCGGGGGGGCCCGAGCCATCAGTGAGATACCACTCTGGAAGAGCTAGAAT
>HWI-ST942:56:C4CFMACXX:7:1101:2757:287741
CTATGAAGCTTCACTGTTCCCTGGGATTGGCTTTGGGCTTTTCCTGCGCAGCTTAGGTGGAAGGCGAAGAAGGCCCCCTTCCGGGGGGGCCCGAGC
>HWI-ST942:56:C4CFMACXX:7:1101:2832:175931
AACTCTCGTTTTCGATTATAAAAGATGGAATCGACCAAACCGATATATAAAAAATGATAAAATTGAAAAAATGGAAAAAATGAAAATGTCAAAAAATTTT
>HWI-ST942:56:C4CFMACXX:7:1101:3318:135461
AGAACTGACTAATCCTAAGTCAAAGGGTCGAGAAACTCAAGGCCACTATTCTTGAACAACTTGGATTGGAGCCGGGCTTTCCTTTCGCACTTTATACGG
>HWI-ST942:56:C4CFMACXX:7:1101:3341:168661
CATATGTGGCAATTCCACCAAGATCTCTTCGTTAGTTGGGGGAAGAATCCGCACGAATCGGATTTTTTTAGGAAAATATCGAGAGAATTGTATATGTTTT
>HWI-ST942:56:C4CFMACXX:7:1101:3479:207771
CTATGAAATTCATAAATAAAATAGTTAATCGTGGGGTTACCATTCTCTCTTTTTTTTTCGTTATCTCGCATGTGGTCCTAAGAAAAGGGAATTTGTC
>HWI-ST942:56:C4CFMACXX:7:1101:3551:321951
GATGGGGATCAAATGGCTGTTCATGTGCCTTTATCTTTAGAGGCTCAAGCAGAGGCTCGGTTTCTTATGTTTTTTTATATTAATCTCCTTTCTTCACCCT
>HWI-ST942:56:C4CFMACXX:7:1101:3963:649771
AATTTGTATCCCTAGCATTTTTTTTTTTTAAGTTGAAACAAATTAGAATTCGAAATTCTCTACGTCGTTTAGGGGATAGAATTTTTTCAGGGACAAAGAA
>HWI-ST942:56:C4CFMACXX:7:1101:3978:804291
ATGGTTACCTGATGCCATGGAGGGCCCTACTCCCATTTCGGCTCTTATACATGCTGCTACTATGGTAGCGGCGGGGCGTTTTTTTTTTAGTCTTGCTTCT
>HWI-ST942:56:C4CFMACXX:7:1101:4148:143071
AGGTCCTGACACAAGGTTAGAATTCTAGCTCTTCCAGAGTGGTATCTCACTGATGGCTCGGGGCCCCCCCGCAGGGGGCCCTCTTCCCCCTCCACCCCAA
>HWI-ST942:56:C4CFMACXX:7:1101:4427:659351
CTATTACTATGAAATTCATAAATAAAATAGTTAATCGTGGGGTTACCATTCTCTCTTTTTTTTTCGTTATCTCGCATA
>HWI-ST942:56:C4CFMACXX:7:1101:4508:383151
TTTTTTTCATCTTTGGCTTAAATTTTCAGAAATAGTCGAACGGTCGATTCTTTTTTTTTTTTTTTTTTTTTTTAAAAAAAATTTTTTTTTTTTTTTTTTA
>HWI-ST942:56:C4CFMACXX:7:1101:4630:46181
AAGGGGAGTTAGCAGCACCAACGAATGATATAAATACGACGGTTGCTTTAGCTTTACTCA
>HWI-ST942:56:C4CFMACXX:7:1101:4849:810891
AGGAATTTTGGTTCACATCCTTAGTGGGAATAATCAAACGATTCTGTTCATACATTCGCAAAATTAAGCGTTTCGTAATTAGTGAACTATATTTTTTGTC
>HWI-ST942:56:C4CFMACXX:7:1101:5582:354991
AAAAATAACTATCGAGGGTTCGAATCCCTCTCTCTCCTTTTGTTGGATGAATCTATTTTTCTCTTTATTGGCTTTTTAGATCGGAAGAGCCACACTTCT
>HWI-ST942:56:C4CFMACXX:7:1101:5750:162581
ATAAAATGCGGTTAATCCCGCTGTTGAACAAGCTATTATTGCAAAAATTGGCGAAAATAACAAACTATCATTAAGAATTTCATCTTTCGACCAAAAACAA
>HWI-ST942:56:C4CFMACXX:7:1101:5773:685051
AAAAAGGAAAGAGAGAGATGGGGTTTCTCTCGCTTTTGGCTTGGCATAGCGGGCCCCCAGCAGGAGGCCCGCACGACGGGCTATTAGCTCAGTGGTAGA
>HWI-ST942:56:C4CFMACXX:7:1101:5897:515361
CGATTACATGGATTATATCTGTTTGCACAAATACCTCGACGAGTGCCGCTCGTTAATACATAGAGTCCAATAAGCATATCTTGAGTCGGTACCGAAATG
>HWI-ST942:56:C4CFMACXX:7:1101:5914:461301
AGGTCATAACTCATTTTTTTTTTATTGGATATTAAATTTTTTATAGTCGAAATAAAATAAAGAGTATTTTTTTTTTTTTTTTCCTTTTCTTTCCTCCTTT
>HWI-ST942:56:C4CFMACXX:7:1101:6261:713791
ATGTATGCAGCTGAGGCATCCTAACAGACCGGTAGACTTGAACCTTGTTCCTACATGACCTGATCAATTCGATCAGGCACTCGCCATCTATTTTCATAGT
>HWI-ST942:56:C4CFMACXX:7:1101:6418:633821
ATTCTTAAGCAAGTCCCCGAGAGGGCTTAGTTGATCCATGATTTCTGTTTCGTCTTTTTTTCCCTTTTCGTTTTTTTCAAAAAAGAGTCGGTTCATTTCC
>HWI-ST942:56:C4CFMACXX:7:1101:6429:510121
TATACCTATCAAAGATATTATATACATTATAGAAGGGATAACGATAAAAAGAGGAAGAAGACGAGCTACAAGAAAAATACCCGCCGCTACCATAGTAGCA
>HWI-ST942:56:C4CFMACXX:7:1101:6619:428431
TAATGATCCTCTTTTTTTTTTTTTTTAAAAATTTTTAATTTGGATTTTCTTTTTTTTCATTTTGATTTTTAGGAACAGGTTTTTTGTTTTTGTAT
>HWI-ST942:56:C4CFMACXX:7:1101:7002:933601
GTTCCCTAGCAACACTTTTTTTCGTTCTATTACTAATTTCATTGGATCCTGAACCCTCGTTTTTATGACCTTTCCCCCCCACTAACAGCGTCTGCCACT
>HWI-ST942:56:C4CFMACXX:7:1101:7055:178541
CTATCTAAATTTAAGTATGTATCTATCAAAAAAAATAGTATATACAACAGATAACCTCGGCTCCAACTTTTTTTTTTAAAAAAAAAATTAGACCAGGGCA
>HWI-ST942:56:C4CFMACXX:7:1101:7338:664001
TTCCAAATGAAATTTTTAATAATTTTTTTTTTTAGCCCCCATATTTAAACCGAAAAAAAAAAAAGTTTTTTTTTTTTTCAAAAAAAAAGGGGGGAATGAC
>HWI-ST942:56:C4CFMACXX:7:1101:7463:146901
TTCCTCATTGCGGGTCATATGTATAGAACGAACTTTGGAATCGGACACAGTATAAAAGATTTTTTGGAAGAACTTATTCTTCCGGGAGGACGTTTGGGC
>HWI-ST942:56:C4CFMACXX:7:1101:7471:781581
TTCTGACTTTTATCGGGAGAATATCCAACTATAGCTTCCATTGAATGAATAATGGATCCAGATCCTAAAAACAACAAAGCTTTCGAATAAGCATGAGTAA
>HWI-ST942:56:C4CFMACXX:7:1101:7474:725681
TTTTAGTAAAATCTCGTATACTAATATAAAAAAAAACTTTTTTTATTCCAATACGGAATGAAAAGAAAAGGACAGATCGGAAGAGCACACCGTCTGAACT
>HWI-ST942:56:C4CFMACXX:7:1101:7625:617021
AGGGATAACGATAAAAAGAGGAAGAAGACGAGCTACAAGAAAAATACCCGCCGCTACCATAGTAGCAGCATGTATAAGAGCCGAAATGGGAGTAGGGCCC
>HWI-ST942:56:C4CFMACXX:7:1101:7823:205111
ATAGCAAATATTATAGAATAGAATAAAAAAAAAAGGAACAAAGGGAAAGGTCTTATTCGAAGCGCCTCGTGATTCGCAACCCATTCTTTGCTTCAATATA
>HWI-ST942:56:C4CFMACXX:7:1101:7869:110071
TCTATTTTTGATTATTCTCAAAGGATAAGATTATTCTTTTTACCAAACATCTGCGGGTCCAATCACACGATCTTATAATAAGAACAAGAGATCTTTCTCA
>HWI-ST942:56:C4CFMACXX:7:1101:8100:677831
TACCATACTAGCGGACCCCTTAGGATACTACTACTGAGTCTAATGCGTTCCTTTCATTTAAGACGAGAAATTGAAATCTTTTTTTTTTTTTTTTTATAAA
>HWI-ST942:56:C4CFMACXX:7:1101:8109:518351
TCCCTGGGATTGGCTTTGGGCTTTTCCTGCGCAGCTTAGGTGGAAGGCGAAGAAGGCCCCCTTCCGGGGGGGCCCGAGCCATCAGTGAGATACCACTCT
>HWI-ST942:56:C4CFMACXX:7:1101:8464:127011
GACGATTACACTATTCGAACAATTTGGAATTCACCTCAAACAAAAAATGGGGTAAACCCTTTAATTTGATTAAAAAAAGAATTCCAAGTTGTTGAATTAT
>HWI-ST942:56:C4CFMACXX:7:1101:8578:774191
GTATATTGGATTTTTTGAGACAATTGTAGATTCTGGGAGGCAATTCTAATTGGTCAATAAAAATATATTGAAAGGCTAGTTCTTTTGTTTTTTTTTTTTT
>HWI-ST942:56:C4CFMACXX:7:1101:9007:39051
TATGGGAAAGCGATAGAGAAAGAGAAAAAAAAAAACGAAGATTTCACATAGTGATTTTTTTTTTTTTTTTTTTTAAAAAAAATGGGAAAACAAAAGCCT
>HWI-ST942:56:C4CFMACXX:7:1101:9076:496451
TAAGTATGTATCTATCAAAAAAAATAGTATATACAACAGATAACCTCGGCGCAAAATTTTTTTTTAAAAAAAAAAATTAGACCCGGGCGAATAAAATAAA
>HWI-ST942:56:C4CFMACXX:7:1101:9081:440201
TGGATCTACATTGGATCTCACCTGAATCGCCCCATCTATCCTCCTGAGGAGAAGTTTGGTTTCAAACCCCGGTTAGATCGGAAGAGCACCACGTCT
>HWI-ST942:56:C4CFMACXX:7:1101:9223:59671
TCTTTTATCCACACCGAATACATAATGAGATTCCCGATCCAATAAAAAAAAAAGTCTTTATTATTTTTTTTTCCCGCCTTTCCTTTTTAAAACCAAGAGT
>HWI-ST942:56:C4CFMACXX:7:1101:9738:362311
AGGTGGAAGGCGAAGAAGGCCCCCTTCCGGGGGGGCCCGAGCCATCAGTGAGATACCACTCTA
>HWI-ST942:56:C4CFMACXX:7:1101:9916:426151	Yes
TCATATTCCCCAAAAAGTGGATCCCGCTCTAATAGCCCCGAATAAATTAAATACATGCATTAAAATACGAAAGCTTCTTATTTTAATGCATGTATTTAAT
>HWI-ST942:56:C4CFMACXX:7:1102:10058:309001
ACACGAGAAATTGAGCAAAAAGCTGCTGAATTGGCTTACTTCTTGCGTGTACCAATTGAAGTATTTTGAAATGAATTAATTAAATGCTTTGCCAGAAG
>HWI-ST942:56:C4CFMACXX:7:1102:10216:740111
AATTCACGTTTGTTTTATTAGTTTAATTGCACTCGGCTCAAACTTTTTTTTTTTTAAAAAAAATTAGCCGAGGGTATATGTTGTTTTTACTATTTTTTTT
>HWI-ST942:56:C4CFMACXX:7:1102:10251:435241
CTTAACAATGAGATGAGGCAATCTATCAAGGAAAGTAAAAAAAAAACGAAACTTAACCCCTTTTTTTTCTTTTTTTTTTTTTTTTTAACCAAAACACTTT
>HWI-ST942:56:C4CFMACXX:7:1102:11301:332031
TTGATCCTATAGAATCTGACCCATTTTCTCATTGAGCGAAGGGGTACGAAATAAATTCAATCAGATTTATTTTTGATCAAAAAAAAAAAAAAATCACTA
>HWI-ST942:56:C4CFMACXX:7:1102:11393:219071
AAGAGAGAGATGGGGTTTCTCTCGCTTTTGGCTTGGCATAGCGGGCCCCCAGCAGGAGGCCCGCACGACGGGCTATTAGCTCAGTGGTAGAGCGCGCCCC
>HWI-ST942:56:C4CFMACXX:7:1102:11463:212241
TAACATTTCCCTTTTTTTCATTCTAGTTATTAACATCAGAAAGGGGTGAAAAATTTAGAGATACAATCAACAATCGGGGACTAACCCCCCCACCCTTTCT
>HWI-ST942:56:C4CFMACXX:7:1102:11840:421801
TGTAGGATTTGAACCTACGACATTGGGTTTTGGAGACCCACGTTCTACCGAACTGAACTAAGAGCGTTTTTGTTTTTTTTTTTTTTTTTAAAAAACGAAA
>HWI-ST942:56:C4CFMACXX:7:1102:11864:862681
TATGGGAAAGCGATAGAGAAAGAGAAAAAAAAAAACGAAGATTTCACATAGTGATTTTTTTTTTTTTTTTTTTTAAAAAAAAAATTTGATTAAATTTTTT
>HWI-ST942:56:C4CFMACXX:7:1102:12247:572601
ACCGGTGGCAGCTTCGAATAGATCATATACAAATTCTCGTTCTCTGAAAATATAGAAAAAGGGAGTCTGTGCACCAATATCTGCCATAAAAGGGCC
>HWI-ST942:56:C4CFMACXX:7:1102:12252:719131
AGTTGTTGAATTATATTTATATAAAGAATTTAATTAAAAACTTGTATTGTATTTATATAATAATAATAATATTAAGTATTAAGGCACATTCTTTTAATAT
>HWI-ST942:56:C4CFMACXX:7:1102:12859:53941
AAAAAATTCTAAGTATCTATCATCGGTTCACTAATTACTTGAGTGACTGTTGGCGGGGTTCTTTTTATGTGTTTTCCCGGAAAAGGGGGGCTCAAA
>HWI-ST942:56:C4CFMACXX:7:1102:13256:881211
TATTACTATGAAATTCATAAATAAAATAGTTAATCGTGGGGTTACCATTCTCTCTTTTTTTTTTTCGTTTTTCCGCTGTGGGCCTAAGGAAAAGGGAATT
>HWI-ST942:56:C4CFMACXX:7:1102:13577:533001
ATAAATAAAATAGTTAATCGTGGGGTTACCATTCTCTCTTTTTTTTTTCGTTTTCTCGCCTGTGGTCCTAAGAAAAGGGAATTTGTCGATTTTTCGGGGT
>HWI-ST942:56:C4CFMACXX:7:1102:13975:469271
GAAAAGGTACTTTTGGAACGCCAATAGGCATGAAATGAAAAAAAAAGAGAATGAAGTTCTCTATTTCACTTTGATGTGGAAACGTAAAATTGGGGTTTC
>HWI-ST942:56:C4CFMACXX:7:1102:14052:177181
TACCAAGTACTTCTTGGCGAGCTCTAATATGATCAGATTTATAAGTAAGCATCTCTTGTAAAATATGAGCAACACCAAACCCCTCCAGAGCCCAAACCTC
>HWI-ST942:56:C4CFMACXX:7:1102:14068:724251
TTTTTTTTCTATCTAAATTTAAGTATGTATCTATCAAAAAAAATAGTATATACAACAGATAACCTCGGCCCCAATTTTTTTTTTTAAAAAAAAAATTAAC
>HWI-ST942:56:C4CFMACXX:7:1102:14267:87781
GTTTACCAACCACACATTGTCTAACCAAATCCAATTCTCTCTCGATATTTTCCTAAAAAAATCCGATTCGTGCGGATTCTTCCCCCAACTAACGAAGA
>HWI-ST942:56:C4CFMACXX:7:1102:14378:217561
TTTTGAGCAAGAGCTAAAGTGGCTCCTAAGAGTACTGTTATTATACCTATCAAAGATATTATATACATTATAGAAGGGATAACGATAAAAAGAGGAAGAA
>HWI-ST942:56:C4CFMACXX:7:1102:14561:183041
TCTATTATATCATCAGGGTAATGATCCATCAACCCGCTAGTTCGTTTTATGAGGCACAAACGGGAGAATTTATCTTGGAAGCGGAAGAATTACTTAAACT
>HWI-ST942:56:C4CFMACXX:7:1102:14578:344011
GAGTTTTTTTTCTATCTAAATTTAAGTATGTATCTATCAAAAAAAATAGTATATACAACAGATAACCTCGGCTCCAACCTTTTTTTTTAAAAAAAAAATT
>HWI-ST942:56:C4CFMACXX:7:1102:14599:238361
CGTTCTATTACTAATTTCATTGGATCCTGAACCCTCGTTTTTATGACCTTTCCCCCCCCCCCTCCTTCCCCCACCTCCCCATGCCTCTTCATCTTTCAAC
>HWI-ST942:56:C4CFMACXX:7:1102:14721:858931
TTTAGTCCTTTCCCTTTCAATGAAAGATTCAAGGAAGATTATAGATTCTCGTAATTTATATCCAAAGACTCTAGATCGGAGAGCACACGTCTGAACTCCA
>HWI-ST942:56:C4CFMACXX:7:1102:14880:787661
GCCCTCACAGCCCAGGCACAACGACGCAATTATCAGGGGCGCGCTCTACCACTGAGCTAATAGCCCGTCGTGCGGGGCCCCCCCCCGGGGGCGGCCCCGC
>HWI-ST942:56:C4CFMACXX:7:1102:14909:133591
TATTATATTAATAATAAATAATAATAATAAATAATAAAAAATTACTATATATTTTTTATTAGAAAAAAAATAAGGTGGAATTTGCTACCTTTTTTTATTT
>HWI-ST942:56:C4CFMACXX:7:1102:1500:126811
GCAGAGGCGCATAATAGATCGATATGAACATCATGAGCTGTCCCGCAATAAAACCTGTTGTA
>HWI-ST942:56:C4CFMACXX:7:1102:15066:106231
ATCAAAAAAAATAGTATATACAACAGATAACCTCGGGTTCAAATTTTTTTTTTAAAAAAAAAATTAAGACCGGGGCAATTAAAAAAAAAAAAAAAAAA
>HWI-ST942:56:C4CFMACXX:7:1102:15413:626021
ATATAGTCATAGAATAGTATAGAATTATTAGAATTTCAAATTTACGAAGTAGACTTATAATTTTTTTCCATTGCACATTGTAGAATTCTAAGTTTCAATA
>HWI-ST942:56:C4CFMACXX:7:1102:15464:464831
CCTACTCCCATTTCGGCTCTTATACATGCTGCTACTATGGTAGCGGCGGGGGTTTTTTTTTTTGGTCTGCCTCTTTTTCTCTTTTTTTTTTTTCCTTTTT
>HWI-ST942:56:C4CFMACXX:7:1102:15513:391911
ATCCATGTGGCTGAGAGCCCTCACAGCCCAGGCACAACGACGCAATTATCAGGGGCGCGCTCTACCACTGAGCTAATAGCCCGTCGTGCTGGGCAGCCGC
>HWI-ST942:56:C4CFMACXX:7:1102:15663:703441
AATTGAGAAATACCGCTGGAACTTACGGAGTTTTGTAAAGACTAGAAAAAAAAAGTAATTTCATTTTCACCTATGATATTAATATTTCAAATC
>HWI-ST942:56:C4CFMACXX:7:1102:15720:100811
TGGTCAGAAGAATCCTCCGAATATTTTTATCTTGGATTGGTGATCTTTTTCGATAGAAATATATATATTGAATATGAATTGAATAAAAAAACTCGGGAG
>HWI-ST942:56:C4CFMACXX:7:1102:15893:71001
TTATTTGATTTCTTTTTTGATTTTATTCCCTTCCATCATTCTTAAGTCCCATAAGTTTGATCCTATAGAATCTGACCCATTTTCTCATTGAGCGAAGGG
>HWI-ST942:56:C4CFMACXX:7:1102:16081:29911
AAATTATATTTTTTGTATGTATTCATTTAGTTTGGTTAATTCTTGCTCGAGCCGGATGATAAAAAATTATATTTTCGGCTTCCTTCGGGGGATGGACCAT
>HWI-ST942:56:C4CFMACXX:7:1102:16444:62531
AGTTATTAACATCAGAAAGGGGTGAAAAATTTAGAGATACAATCAACAATCGGGGACTAACCCCCCCACCCCTTCTTTTTTGATGAAAAAAAATGAAAAA
>HWI-ST942:56:C4CFMACXX:7:1102:16613:122851
GTAAATGAGAGTTTCTTTCTCACATACACCTTCGATTACATTACATTGTCATCTCGTATGCCGCCTTCTGGATATATTTAATTGATATCTGAAGCCAT
>HWI-ST942:56:C4CFMACXX:7:1102:16864:809051
CAGAAGATCCGTTCAATTGGCTAGAATCCGTTACTTTAACGAAACTAGATCTTGCAGAATCATATTGAATATTTGAAGATAGGGTTCCGAACTTGCTGAA
>HWI-ST942:56:C4CFMACXX:7:1102:17135:795021
GGAAAATCGTTAGATATGAATATGTTAGATACCTGTGACTCGATTGACGAAGGTGAAATAGTATCTCTCTCCAAAAAAGCATGTTTTTTTTTTCCCACCC
>HWI-ST942:56:C4CFMACXX:7:1102:17327:375291
AATCTTCGGACAGTTGAATTAATGGATCGTCCATTTTAAAATTATAACAAAAAGCGTAGGTCGTTAGAAGAAGTTCTAGATCGGAAGAGCACCACGTCT
>HWI-ST942:56:C4CFMACXX:7:1102:17463:109811
ACTACTATTTCTTAACAATGAGATGAGGCAATCTATCAAGGAAAGTAAAAAAAAACGAAACTTAACCCTCTTTTTTTCTTTTTTTTTTTTTTGTTT
>HWI-ST942:56:C4CFMACXX:7:1102:17593:614221
CTCACAGCCCAGGCACAACGACGCAATTATCAGGGGCGCGCTCTACCACTGAGCTAATAGCCCGTCGCCCTCTTCCCCCCCCCCCTGCGCGTCCCCTCCC
>HWI-ST942:56:C4CFMACXX:7:1102:17657:208581
GAGAAAAAAAAAAACGAAGATTTCACATAGTGATTTTTTTTTTTTTTTTTTTTTTAAAAAAAAAATCTGATTGAATTTTTTTTGTACCCCTTCCCCCAAT
>HWI-ST942:56:C4CFMACXX:7:1102:18017:669211
GGCTGAGAGCCCTCACAGCCCAGGCACAACGACGCAATTATCAGGGGCGCGCTCTACCACTGAGCTAATAGCCCGTCGTGGCAGGCACCCCCCGCCGGGC
>HWI-ST942:56:C4CFMACXX:7:1102:18115:563301
ATTCCCTTCCATCATTCTTAAGTCCCATAAGTTTGATCCTATAGAATCTGACCCATTTTCTCATTGAGCGAAGGGGTACGAAATAAATTCAATCAGATTT
>HWI-ST942:56:C4CFMACXX:7:1102:18215:319271	Yes
CAGGTACTGTAATGTGCCTCACCGTGGGTGTCAGTGGGGTAATAATTCCATATTGATTCGAACCAACCCATAGGCTCCCA
>HWI-ST942:56:C4CFMACXX:7:1102:18466:989261
TTTTCTGATTTTATTTATTTAGTATTTCATCAAAATTGAAAAAAAAAAAAAAAAAAAAAAAAAAAAAAAAAAAATATAAAATATATATATATATATAAAA
>HWI-ST942:56:C4CFMACXX:7:1102:18475:676331
CTAGAAATTTTTTGTGATGAACGTACAGGAAAACCTTCTTTGGATTTGCCCAAGATTTTTGGAATAGATCGGAAGAGCACCACGTCTGAACTCCAGTCAC
>HWI-ST942:56:C4CFMACXX:7:1102:18807:827071
GAGTTACTAAGAGAGAACCTCTTATTATTTGAGCAAATAGGAAGCTATCCCAAGTTTCTGCAATTTCTATA
>HWI-ST942:56:C4CFMACXX:7:1102:18904:741741
AATAGCATGGCACTTCGAATTCAATATGAAATTTTTTAGATTAAAAAAAAATTCGATA
>HWI-ST942:56:C4CFMACXX:7:1102:18923:540431
GTGCTGTACTTATGGGAAAGCGATAGAGAAAGAGAAAAAAAAAAACGAAGATTTCACATAGTGATTTTTTTTTTTTTTTTTATCAAAAATAAAACT
>HWI-ST942:56:C4CFMACXX:7:1102:19184:928031
AATCATTGATGGAATTACAAATGGAGTAGGTATTACAAGTTTCTTTGTAGGAGAAGTAACAAAATATATAGGTGGAAGTCGCATCTCTTCTTATCT
>HWI-ST942:56:C4CFMACXX:7:1102:19210:445781
TATGTCTCTCCGAGAAGTTGGTTATCTACCTCTCATTTTGTTCTAGGATTTTTCCTATTCGTGGGTCATTTATGGCACGCGGGAAGGGCTCGGGCAGCG
>HWI-ST942:56:C4CFMACXX:7:1102:19522:391311
GATAGATTGCCTCATCTCATTGTTAAGAAATAGTAGTATCCCTGTCTAACACTAATCCAAGAAAGTCAGCCAGAATCCATCTTCTAATTAGGGAAAAAG
>HWI-ST942:56:C4CFMACXX:7:1102:1986:915141
AAGAACATAAATCCTGTAGCCCAAACAAGATGCCCAAATAAGAACATCCATGCCCAGACTGATAAACTATTCATACCAAACGGGTTATATCCATTGATAA
>HWI-ST942:56:C4CFMACXX:7:1102:20128:583571
CCAAGAATTACTACACAACTTTTTTTTGAATCAACAAAAAAAATTCTTGATAAATATATTTACAAGAATGAAGAAAATGGAGAAAAAAAAAAATACTCTT
>HWI-ST942:56:C4CFMACXX:7:1102:20140:329041
TTTTAGTTATTTTGGACTAAAAAAAAAAGAAAATAATTATTAATAGTAATAGTATGTAAATGCATTCATTTTCTCTGCATCGACTCGATTTATGATACTA
>HWI-ST942:56:C4CFMACXX:7:1102:20310:893511
TGATTATAAAACTTATAATATCTCTTTTAGAAGATCTTATGCCGCTACTCGGACTCGAACCGAGATGCTCTAGCACTGCTTCCTAAGAGCAGCGTGTCTA
>HWI-ST942:56:C4CFMACXX:7:1102:20635:945861
CTAATTATTTTTCGTAATCGAAAACCACGATGGGCTTAAATACTTTTTTTTTTTGGGGTTTTTTTTTTAAAGGTTTAATTTATAATTAACCAATTGAAAT
>HWI-ST942:56:C4CFMACXX:7:1102:20826:810321
GAGTGCCGCACCCTAGATGGCGAGAGTCCAGTAGCCGAAAGCATCACTAGCTTATGCTCTGACCCGAGTAGCATGGGGCACGTGGAATCCCGTGTG
>HWI-ST942:56:C4CFMACXX:7:1102:21068:258201
GTAATAATATCGATTCATAATGGATTCATATCGATACAGAAGAAAAGGTTATCTATCGATTCAACAAGTGCTGTACTTATGGGAAAGCGATAGAGAAA
>HWI-ST942:56:C4CFMACXX:7:1102:21338:94731
TNCTTCAATTTAAATTATAACAGTAATGATGAGCATATGTAAACCCCAGAATCAGAACATACGTTACGTTGTGTTATAGATCGAAGAGAAACCAGCCTCA
>HWI-ST942:56:C4CFMACXX:7:1102:2192:940141
GTGTGGCGGCAGGGAGGCGTAAAAAGGAAAGAGAGAGATGGGGTTTCTCTCGCTTTTGGCTTGGCATAGCGGGCCCCCAGCAGGAGGCCCGCACGACGG
>HWI-ST942:56:C4CFMACXX:7:1102:2265:475691
CCATATTTCGATTGTTAATACGATATAGAAGGGCCCCTCTACAAATAGTCTACACCCTTGATCGTGAAATATCGATTGCTTGTTGAACCCTGTGAATTGC
>HWI-ST942:56:C4CFMACXX:7:1102:2535:574431
GTCTTGTTTTCCACATCCTCCTTCTTTTTTATTGGTATATCAAATTCATTTCTTCTTTTTTTCTCATATCAGATAACAAAGATATAATTAAAAAATTTAC
>HWI-ST942:56:C4CFMACXX:7:1102:2803:91501
GATATATGGGGGCTAAAAAAAAAAATTATTAAAAATTTCATTTGGAAAAAAAAAAATTGATAAAAAAGAAAAAAAACAATAAAAAAGGGAGGAACAAGAA
>HWI-ST942:56:C4CFMACXX:7:1102:3049:365871
AACTACTGGAAAAATATATAAAAGGTCGTTGGGCCATGCGGGTTCCCCGTAATAATTGTGACCCATACCTTTAGCTAATTTAGCTCGTAATACAG
>HWI-ST942:56:C4CFMACXX:7:1102:3787:779061
AGCCCCTTCTCATCAATGGACTCCTGACGTATACGAAGGAGTGCGGTTCGTTTGAGAAATTCCTACCTCTCTATCTATCTCAGATCGGAAGGAGCACAC
>HWI-ST942:56:C4CFMACXX:7:1102:4404:807801
TTGTGGATTCAATGCGACAATTGTTATGGATTAATGTATAAGAAAGTCAAAATGAATGTTTGTGAACAATGTGGACATTATAGATCGGAAAGAGCACAC
>HWI-ST942:56:C4CFMACXX:7:1102:4409:59621
AGATATAGGTGGATTCCTATATATTAAGATATTTCACTTGTATCTTTATACATTACAATAACCATAATGGCTAGTATGGTAGAAAGAGATCTCTTTCTAC
>HWI-ST942:56:C4CFMACXX:7:1102:4525:423131
GTTACTTTACCCTTTTTTCCTTTTCATAATCGATTAGTTAACCTAAGAAAAAAAAAAAAACAAAAGAACTAGCCTTTCAATATATTTTTATTGACCAATT
>HWI-ST942:56:C4CFMACXX:7:1102:4660:390491
AAGTTCAACGATATTGAATCAATCGAGCGGACTTCTAAAACTTGTTCTACTTTTGGAAGACCTTGGGTTAGATCGGAAGAGCACACGCTGAACTCCAGTC
>HWI-ST942:56:C4CFMACXX:7:1102:4972:758261
GGAGGGCCCTACTCCCATTTCGGCTCTTATACATGCTGCTACTATGGTAGCGGCGGGGGTTTTTTTTTTTTTTCGTCTTCTTTCTCTTTTTTTTTTTTTT
>HWI-ST942:56:C4CFMACXX:7:1102:5142:601491
TCTCTCTCTTTTCTTTATTTGATTTCTTTTTTGATTTTATTCCCTTCCATCATTCTTAAGTCCCATAAGTTTGATCCTATAGAATCTGACCCATTTTCTC
>HWI-ST942:56:C4CFMACXX:7:1102:5267:42061
TCAACAAGTGCTGTACTTATGGGAAAGCGATAGAGAAAGAGAAAAAAAAAAAACGAAGATTTCACATAGTGATTTTTTTTTTTTTTTTTATCAAAAATAA
>HWI-ST942:56:C4CFMACXX:7:1102:5572:428111
GGATGGGTTACTTTTTATTGGCATTGGAAACACATCACATTATGGCAGGGGTACGCTTCACCGATTAATGAATCTTCCACTTAATTTATGGGAGGGGTAA
>HWI-ST942:56:C4CFMACXX:7:1102:5678:785601
TAATAGGCCATGAACTAGATCCGAATCATTCTCAACGAATCCATAAGAAGTGATCCTAATTTTTTTATTCGGGAACGGGAAGGGACCAAAGGCCTTGAG
>HWI-ST942:56:C4CFMACXX:7:1102:5777:573511
ACAAAACTGTAAATAAAAAAAAAAATAATTATGATTTCTTTGTCCCTGAAAAAATTCTATCCCCTAAACGACTTAGAGAATTTAGAATTCTAATTTGTTT
>HWI-ST942:56:C4CFMACXX:7:1102:5915:204301
CATTCTAGTTATTAACATCAGAAAGGGGTGAAAAATTTAGAGATACAATCAACAATCGGGGACTAACCCCCCCACCTTTTCTAATTAGTAGAATAAATTA
>HWI-ST942:56:C4CFMACXX:7:1102:6002:589141
ATATTCGTCCATAGGTCAAATCGGATATGTAATTATTGGAATAATTGTTGGAGACTCAAAAGATCGGAAGAGCACACGTTGAACTCCAGTCACATGTCA
>HWI-ST942:56:C4CFMACXX:7:1102:6139:57271
CATATAGGCCTTTATGGCCTTGGCCTGTAAATGGACCTTTACGAGCCTCTAAAATATCTTTTATACCATGACCACTACCCCAGTTGGTCCTATACATAT
>HWI-ST942:56:C4CFMACXX:7:1102:6395:765161
TATTTGGGAATTTTTTCAAGCAAAAGTACATTCCCCCCTTTTTTTTGATAGAATAGATAAACTTTTTTTTTTTTCGTTTGATATATGGGGGCTAAAAAAA
>HWI-ST942:56:C4CFMACXX:7:1102:6448:52501
GAGAAAAAAAAAAACGAAGATTTCACATAGTGATTTTTTTTTTTTTTTTTTTTAAAAAAAAAATTTTTTTAATTTTTTTTGTTACCCCTTCCCCAAAT
>HWI-ST942:56:C4CFMACXX:7:1102:6494:26821
ATGTTCTTTTTTTTTTCATCTTTGGCTTAAATTTTCAGAAATAGTCGAACGGTCGATTCTTTTTTTTTTTTTTCTTTTATTAAAAAAAATTTATTTTTTT
>HWI-ST942:56:C4CFMACXX:7:1102:6769:66071
TGAGCGAAGGGGTACGAAATAAATTCAATCAGATTTATTTTTGATCAAAAAAAAAAAAAAAATAAACATGTGAAACCTTCTTTTTTTTTTTTTTTTTTTT
>HWI-ST942:56:C4CFMACXX:7:1102:6936:936101
TCTATCGATTCAACAAGTGCTGTACTTATGGGAAAGCGATAGAGAAAGAGAAAAAAAAAAACGAAGATTTCACATAGTGATTTTTTTTTTTTTTTTTTTA
>HWI-ST942:56:C4CFMACXX:7:1102:7029:649591
TCTTTTAACTAGTTCAGGAAGAATTTGCAAATTAATAAAACCCGGTGGTCGTATTTTCCATCTCCAAGGAAAACCGCTTTGATCTCCTATGAGAAAAATT
>HWI-ST942:56:C4CFMACXX:7:1102:7048:250811
GGATTAGAAATTGGACAAGTAAGAAAATTTCTCGTTCAATTACGCACTTACTTAAAAACGAATAAACCA
>HWI-ST942:56:C4CFMACXX:7:1102:7309:859761
ATAGAATCTGACCCATTTTCTCATTGAGCGAAGGGGTACGAAATAAATTCAATCAGATTTATTTTTGATCAAAAAAAAAAAAAAAAATCCATTTTTTGAA
>HWI-ST942:56:C4CFMACXX:7:1102:7797:639251
CGGAGAGAGGCTCGGTGAAATAGACATGTCTGTGAAGATGCGGACTACCTGCACCTGGACAGAAAGACCCTATGAAGCTTCACTGTTCCCTGG
>HWI-ST942:56:C4CFMACXX:7:1102:8348:708591
TTTTTGCTTATAATTTACGTAAAAACCGTTAGTCAAAATGATTAATTTGAATAAAATTTTACTATCAAAAAAAAAAAAAAGATTTAAATTTTTCGCTTTA
>HWI-ST942:56:C4CFMACXX:7:1102:8372:436241
AGAACAAATCCTACTACTTCAAATCCAGAGGTTTCGATACGTGAAAAAAAAAAACCTGGGAGGTATCGCCCAAATAATTGGCCGGGTCCGGGATGTACCC
>HWI-ST942:56:C4CFMACXX:7:1102:8412:725181
TCATGTATGGTTACCTGATGCCATGGAGGGCCCTACTCCCATTTCGGCTCTTATACATGCTGCTACTATGGTAGCGGCGGGGGTTTTTTTTTTTTTTCCT
>HWI-ST942:56:C4CFMACXX:7:1102:8435:514431
AGTTATTAACATCAGAAAGGGGTGAAAAATTTAGAGATACAATCAACAATCGGGGACTAACCCCCCCACCCTTTCTTAATAGTAGAATAAACTAGAAAA
>HWI-ST942:56:C4CFMACXX:7:1102:8506:674361
ACAAAATCGAGTCGGGTTAAAGAATGCCCTCTTTCTAGCCTTTTCGTTTTTTAGAAAAAAAAAAAAAAAAAAAACCCCTTATTTTAATTCGGGA
>HWI-ST942:56:C4CFMACXX:7:1102:8688:137971
AATACGAAAAAAATTATGCATCATTCTCATACCGGTGGCAGCTTCGAATAGATCATATACAAATTCTCGTTCTCTGAAAATATAGAAAAAGGGAGTCTGT
>HWI-ST942:56:C4CFMACXX:7:1102:9153:346411
TGTAGAATAGGCTAAACCCCGCTTAATGTCTTTTTGAGCAAGAGCTAAAGTGGCTCCTAAGAGTACTGTTATTATACCTATCAAAGATATTATATACATT
>HWI-ST942:56:C4CFMACXX:7:1102:9290:421931
GTTTATTTCCAGATGCATTAACATTTCCCTTTTTTTCATTCTAGTTATTAACATCAGAAAGGGGTGAAAAATTTAGAGATACAATCAACAATCGGGGACT
>HWI-ST942:56:C4CFMACXX:7:1102:9552:372721
ATTTTTCGTAATCGAAAACCACGATGGGCTTAAATACTTTTTTTTTTTTAGGGGTTTTTTTTTAAAGGTTTAGGTTTTTCTTCACCAAAAAAAAATCCAA
>HWI-ST942:56:C4CFMACXX:7:1102:9745:535821
ATAAAAAATGTATTCATCATTGGATCTGTTCGAGCAGATAAACATATAATAAATAGAAAACTTTTTTTTTACCACCTTACCTTTTCATTGATTTTTTTTC
>HWI-ST942:56:C4CFMACXX:7:1103:10496:269521
TATTAGAATTTCAAATTTACGAAGTAGACTTATAATTTTTTTCCATTGCACATTGTAGAATTCTAAGTTTCAATAATAATAATAATAAATTTCTTTTCAT
>HWI-ST942:56:C4CFMACXX:7:1103:10503:811391
GATGGATCATTACCCTGATGATATAATAGAAAAGGTTTTTCTATTTCGCAGAATGAGACGGGATAACAAAAAAAAAAAAATAGAAAAATTTGAATAACCT
>HWI-ST942:56:C4CFMACXX:7:1103:10507:511011
TATACATTATAGAAGGGATAACGATAAAAAGAGGAAGAAGACGAGCTACAAGAAAAATACCCGCCGCTACCATAGTAGCAGCATGTATAAGAGCCGAAAT
>HWI-ST942:56:C4CFMACXX:7:1103:10559:366011
TGTATTGTCTAAAAAAAAAAAAAAAAAAAATTTAAAAAAAAAAAAAAAAAAGGAAGCAAATTCCCCCTTTTTTTTTTTCTAATAAAAAATATATAGAAAT
>HWI-ST942:56:C4CFMACXX:7:1103:10691:62371
TCTTTTCGTAAAATTTTACTTATTATCCCTCCTGCCGTAGCATTATAAACTGTATTGTTACTTTTGCTACCATCAGGATAAATCTGACCCCTTCCCCTGT
>HWI-ST942:56:C4CFMACXX:7:1103:10792:167891
TCAACAAGTGCTGTACTTATGGGAAAGCGATAGAGAAAGAGAAAAAAAAAAAACGAAGATTTCACATAGTGATTTTTTTTTTTTTTTTTTATAAAAAAAA
>HWI-ST942:56:C4CFMACXX:7:1103:11014:497611
ATCTCTTTGCCCCTCATTCTTCGAGAATCAGAAAGAGACTTTTTCAAGTTTGAATTTGTTCATTTGGAATCTGGGTTCTTCTACTTCATTTTGATTTACT
>HWI-ST942:56:C4CFMACXX:7:1103:11390:593161	Yes
ATGATGGAAGGGAATAAAATCAAAAAAGAAATCAAATAAAGAAAAGAGAGAGAAAATAAAGAAAAAATAAGTAAATCAAGAAGCGATGGGAACGACGGAA
>HWI-ST942:56:C4CFMACXX:7:1103:1151:481691
ACTGTTATTATACCTATCAAAGATATTATATACATTATAGAAGGGATAACGATAAAAAGAGGAAGAAGACGAGCTACAAGAAAAATACCCGCCGCTACCA
>HWI-ST942:56:C4CFMACXX:7:1103:11558:409261
ATATAATATTTTTATAATTACTACTTCTATTATATGCAAAATTATGATAAAAACTCTATAAAAAAAAATTAAACCAGGCCGACCAAAACCGGTGGCTCAA
>HWI-ST942:56:C4CFMACXX:7:1103:1183:960251
TTATTTCCAGATGCATTAACATTTCCCTTTTTTTCATTCTAGTTATTAACATCAGAAAGGGGTGAAAAATTTAGAGATACAATCAACAATCGGGGACTAA
>HWI-ST942:56:C4CFMACXX:7:1103:12111:167551
ATTATCAAAATGATTCGAACTCTTTCAAAGACCCAACATGCATTTTTTTTTGCTTGGGCCTCTTTCTTTACTTGTTGAAAAATCAAGTAAGCCACCATAT
>HWI-ST942:56:C4CFMACXX:7:1103:12210:425821
AAGTTGTGAAGAGTTTAACCATAGATAATCTCTTAACCATCCCATCAAATAAGTGGAAGATTCATTAAACTGTGAAACGTTACCCTGCCATAATGT
>HWI-ST942:56:C4CFMACXX:7:1103:12509:491361
GAGCGGTGATTGGATTGATGATAAAATAGAATCCTGGGTCGCGAACAGTGATTCGATTGATGATAAAGAAAGAGAATTCTTGGTTCAGTTCTCCACCTTA
>HWI-ST942:56:C4CFMACXX:7:1103:12655:764681
AATTGTATCTACATCAATTCATATCCATTAGATTCTAATTTCACTCTATTTAGAAACATATAAAAAACAAATTTCCTGGTTAAAAGATCGGAAGAAGCAC
>HWI-ST942:56:C4CFMACXX:7:1103:12861:320511
TCTTTCGTTTCTCGACGGTGAAGTAAGACCAAACCCATGAGCTTATTATCCTAGGTCGGAACAAGTTGATAGGATCCCCTTTTACGCCCCCATGTCCCTC
>HWI-ST942:56:C4CFMACXX:7:1103:12883:632021
ATGGATATTTATCAAATCCAATATTAAAAAAGCAAAAAATACCCCGTTAAGTAAATTTGAAGTCAATTCAAATTCTCATTTCTAGTTCCCAAATGAGCTA
>HWI-ST942:56:C4CFMACXX:7:1103:13066:491461
TGTACAAGGAAAGTAAACTACTAGGTTTTAGAAAGGAAAGCCGGGAAAAAGAATCATAAAGAACTTTTTTTTTATTGGATTCGGGATCTCCTTATGTAAT
>HWI-ST942:56:C4CFMACXX:7:1103:13880:94301
CTTAACAATGAGATGAGGCAATCTATCAAGGAAAGTAAAAAAAAAACGAAACTTAACCCTCTTTTTTTCTTTTTTTTTTTTTGTTTGACCAATCACTTCT
>HWI-ST942:56:C4CFMACXX:7:1103:13933:767061
GAAGGCCCCCTTCCGGGGGGGCCCGAGCCATCAGTGAGATACCACTCTGGAAGAGCTAGAATTCTAACCTTGTGTCAGGACCTACA
>HWI-ST942:56:C4CFMACXX:7:1103:14189:499111
TCTCATATCAGATAACAAAGATATAATTAAAAAATTTACTTTTTTTTTTTTTTTTATTTTCCAATTTTAAAAAAAATGGGCCTTACCGTTTCC
>HWI-ST942:56:C4CFMACXX:7:1103:14373:21621
TGGAGCCGGGCTTTCCTTTCGCACTTTATACGGGTATGAAATGAAAATAATGGAAAAAGTTGGATTCAATTGTCAACTACTCCTATCGGAAATAGGATTA
>HWI-ST942:56:C4CFMACXX:7:1103:14606:696101
GAAATGTTGGCTAGGTAAACGTCCTGTAGTAAGAGGAGTAGTTATGAACCCTGTCA
>HWI-ST942:56:C4CFMACXX:7:1103:15075:545221
GAATTGACTTCAAATTTACTTAACGGGGTATTTTTTGCTTTTTTAATATTGGATTTGATAAATATCCATGCAATGAATTTTTTTTTAATAGCCTAGCGCA
>HWI-ST942:56:C4CFMACXX:7:1103:15224:762971
CGAATTAATCGAAATAATTAATAAAAGGAATTTGATAGTTATATATGAGTGAAAAAAAAACTGCTCTGAAATTTA
>HWI-ST942:56:C4CFMACXX:7:1103:15274:123921
TATTCCTCCTAAGGTACGAATACTAAAAAATACCTTGCTAACAACTACTATGTTTAATAATCATACACAAATTTATGAAAAATTTTTTGGATCTAGAGTA
>HWI-ST942:56:C4CFMACXX:7:1103:15471:613511
GAGGGATATTGGTAAGGAATTGGAATGTAATAATATCGATTCATAATGGATTCATATCGATACAGAAGAAAAGGTTCTCTATCGATTCAACAAGTGCTGT
>HWI-ST942:56:C4CFMACXX:7:1103:15483:742261
ATTCAATATGGTTATATATTACATAACATATATATGTTCTTTTTTTTTTCATCTTTGGCTTAAATTTTCAGAAATAGTCGAACGGTCGATTCTTTTTTTT
>HWI-ST942:56:C4CFMACXX:7:1103:15543:624201
CATTACAATAACCATAATGGCTAGGATTGTAGGAAGAGATTTCTTTCTTCCATACTAGCGGACCCCTTAGGGTACTACTACTGAGTCTAAATCGTTTCTT
>HWI-ST942:56:C4CFMACXX:7:1103:15678:559411
GGATTCATATCGATACAGAAGAAAAGGTTCTCTATCGATTCAACAAGTGCTGTACTTATGGGAAAGCGATAGAGAAAGAGAAAAAAAAAAACGAAGATTT
>HWI-ST942:56:C4CFMACXX:7:1103:15683:952631
TCTTTCAAAATTGACTCTTTGTCCCTCTATTAGAGGTGTTCCAGAAATGTCTGCAATCGAGTAAATAGCTCTACGAACTAAGATCGGAAGAGCCACACGT
>HWI-ST942:56:C4CFMACXX:7:1103:15750:514251
TCCATTGATAAGTTGTGAAGAGTTTAACCATAGATAATCTCTTAACCATCCCATCAAATAAGTGGAAGATTCATTAAACTGTGAAACGTACCCTTCCATA
>HWI-ST942:56:C4CFMACXX:7:1103:16000:214301
AGTCCCATAAGTTTGATCCTATAGAATCTGACCCATTTTCTCATTGAGCGAAGGGGTACGAAATAAATTCAATCAGATTTATTTTTGATCAAAAAAAAAA
>HWI-ST942:56:C4CFMACXX:7:1103:16167:728261
ATATTTCAACAAAAAAAATTTGATTTTTTTCAGTAAATGTAAATAGCAGAATTGTGGCTAGGGCAGTATATTATCTACCTAACATCCGGAGCTCACACG
>HWI-ST942:56:C4CFMACXX:7:1103:16299:924081
ATGCAGTTACTAATTCATGATCTGGCATGTACAGAATGAAAATTTCATTCTCGATTCTACGAGAATTTTTATGAAAGCCTTTCATTTGCTTCTCTTC
>HWI-ST942:56:C4CFMACXX:7:1103:1647:858291
GTATGGTTACCTGATGCCATGGAGGGCCCTACTCCCATTTCGGCTCTTATACATGCTGCTACTATGGTAGCGGCGGGGGATTTTTTTTTTGCTCGCCTTT
>HWI-ST942:56:C4CFMACXX:7:1103:16630:850661
GTTGAAACTGTTTTTCTGTATCCGTGGGCAATGAGTTTCGATGTACTGGGGGAACCGGTTTTTTAGAAGCTTTCATTTTCGTGCTTTTTCTTATTCTTG
>HWI-ST942:56:C4CFMACXX:7:1103:16859:824251
TAGGACATGTATTTCTATTACTATGAAATTCATAAATAAAATAGTTAATCGTGGGGTTACCATTCTCTCTTTTTTTTTTTTCGTTATTTCGCATGT
>HWI-ST942:56:C4CFMACXX:7:1103:16949:947371
AGACAGCATCTCGTTCTTTTATCAGAGGTTCTACCAATTGATATGTTTCCACAAATAATTGAAATTCAATTTCGTGATCTAGATCGGAAAGAGCACACGT
>HWI-ST942:56:C4CFMACXX:7:1103:17008:289581
TTAAAAGCCGAGTACTCTACCGTTGAGTTAGCAACCCCCCCCAAAAAAAAGAACGTACTGCAAATATGTAGATACAATCAGAACAAAGAAAAAAATACA
>HWI-ST942:56:C4CFMACXX:7:1103:1720:494951
TTTTACGGTATAGACGCTTATGACCTCCCCCTCTATGCCTTGCGGTAATTATTCCTCTGGCATTACGACCTTTACCACAATGAGATCGGAAGGCACACGT
>HWI-ST942:56:C4CFMACXX:7:1103:1732:857011
TTTTCTTTTTTTTTTTTTCTAAAAAACGAAAAGGCTAGAAAGAGGGCATTCTTTAACCCGACTCGATTTTGTACGTGTATAATATATTCTACATAGTATA
>HWI-ST942:56:C4CFMACXX:7:1103:17345:450681
AGCTGAAGTAAGGATAAAAGGCCCTGGACTCGGAAGAGATGCGGCATTACGAGCTATTCGTAGAAGCGGTATACTTTTAAGTTTCGTACGAGATGTAACC
>HWI-ST942:56:C4CFMACXX:7:1103:17583:139811
ATCTGTCTTGTCCGGAAAATGGATATCCCCTGAAAATATTTTGAGTTCAATCCTTTTTTTTTTTTTTTTTTCCCGGGTTAACCCCCCCACTTTGCTTTTT
>HWI-ST942:56:C4CFMACXX:7:1103:17608:84541
GTAGAATAGGCTAAACCCCGCTTAATGTCTTTTTGAGCAAGAGCTAAAGTGGCTCCTAAGAGTACTGTTATTATACCTATCAAAGATATTATATACATTA
>HWI-ST942:56:C4CFMACXX:7:1103:18083:608351
CATATTCAAAAAAATAAGATTTTTTAGATCGGCTGAGACCGAATCATATCACCTTTTTTTTTTTTTTTTAAAAATTTCAATCCGTTAAACCCCATTTGAA
>HWI-ST942:56:C4CFMACXX:7:1103:18118:427001
AAAGGCGTAACGATCTGGGCACTGTCTCGGAGAGAGGCTCGGTGAAATAGACATGTCTGTGAAGATGCGGACTACCTGCACCTGGCCAGAAAGACCCTAT
>HWI-ST942:56:C4CFMACXX:7:1103:18188:327201
TAGCTTCCATTGAATGAATAATGGATCCAGATCCTAAAAACAACAAAGCTTTCGAATAAGCATGAGTAATCAAATGAAATAAAGCAGATCGATAAGACCC
>HWI-ST942:56:C4CFMACXX:7:1103:18228:454491
ATTCATATCGATACAGAAGAAAAGGTTCTCTATCGATTCAACAAGTGCTGTACTTATGGGAAAGCGATAGAGAAAGAGAAAAAAAAAAACGAAGATTTCA
>HWI-ST942:56:C4CFMACXX:7:1103:18231:180231
GGGGTACGAAATAAATTCAATCAGATTTATTTTTGATCAAAAAAAAAAAAAAAACCACTATGCGAACTCTCCGTTTTTTTTTTTCTTTTTCTCTACCCCT
>HWI-ST942:56:C4CFMACXX:7:1103:18525:975251
ATACAATCAACAATCGGGGACTAACCCCCCCACCTTTTTTAATTAGTAGAATAAATTAGAAAAGGGGGGGGGGGGGGGGAAGGGGCAAAAAAAAAGGGGT
>HWI-ST942:56:C4CFMACXX:7:1103:18934:239681
AATCCTGTTACATGAAATGCGCCAAAACCGAAGCAAGCCACTCCTGAAAGAAATAAATGAATTCCAAAAATCTTGGGCAAATCCAAAGAAGGTTTTCCTT
>HWI-ST942:56:C4CFMACXX:7:1103:19285:325411
TAAATCAATTTTTTTTTTAGGGAGGGGCTCCCTGTATTTCGATTTCAAAAATCGGTTACTACTCCTGAATA
>HWI-ST942:56:C4CFMACXX:7:1103:19355:408351
CAGCCAATTGTCTTGATCGTGGGATACGATTGAGAAATAGGCTGAATCCGTGTTTTAAAACATTTTCCTCCGTTCCTTTCTGGATTGAAATGGGTCATCA
>HWI-ST942:56:C4CFMACXX:7:1103:19358:755521
TCCAATATGCTAGTTTCAACAATTCTCGTTCTTTACATTTCTTCTTAGCGGCTTTGGCGGGAGTTGGGTATTGGTTTACTGCTTTTGGGATTAGTACTAT
>HWI-ST942:56:C4CFMACXX:7:1103:19819:376071
ATAACGATAAAAAGAGGAAGAAGACGAGCTACAAGAAAAATACCCGCCGCTACCATAGTAGCAGCATGTATAAGAGCCGAAATGGGAGAAGGGCCCTCCA
>HWI-ST942:56:C4CFMACXX:7:1103:19989:453531
GGTGAACGGCGGCCGTAACTATAACGGTCCTAAGGTAGCGAAATTCCTTGTCGGGTAAGTTCCGACCCGCACGAAAGGCGTAACGATCTGGGCACTGTCT
>HWI-ST942:56:C4CFMACXX:7:1103:20091:367511
TTTTCTTTTTTTTTTTTTTTTAAAAAACGAAAAGGCTAGAAAGAGGGGATTCTTTAACCCGACTCGATTTTGTACGTATATACTATATCATACATAGTAT
>HWI-ST942:56:C4CFMACXX:7:1103:20195:401271
GGAATTGAGTCGTATAGCTTCTCATCTGTTATGGCTCCGCCCCTTTTTTGCAGATATTTGGGCGCCGACTCCCCTTTT
>HWI-ST942:56:C4CFMACXX:7:1103:2071:314271
AAAGTTTATCATGATTAAGTGCTTTCTGGGTCGTCTCATACCTTATAAATTCGTCCTTAATCTCAACAATTATATCGAGATTTTTCAAATACAAAG
>HWI-ST942:56:C4CFMACXX:7:1103:20882:627131
GTAGGTCCTGACACAAGGTTAGAATTCTAGCTCTTCCAGAGTGGTATCTCACTGATGGCTCGGGGCCCCCCCGCAGGGGGGCCTCCTCTCCCTCCATCTA
>HWI-ST942:56:C4CFMACXX:7:1103:2180:703051
GTTCTTTGTTGCTCAAAAAGAATGGTTTCATTTTTGTAATTTTCTAATTGTTTCAAAGTTTTATAAGTTGAATTAATCAAATTCAATTTTTCTCGTTC
>HWI-ST942:56:C4CFMACXX:7:1103:2580:473101
AAAGGAAAGAGAGAGATGGGGTTTCTCTCGCTTTTGGCTTGGCATAGCGGGCCCCCAGCAGGAGGCCCGCACGACGGGCTATTAGCTCAGTGGTA
>HWI-ST942:56:C4CFMACXX:7:1103:2875:287291
TCATTTGGAATCTGGGTTCTTCTACTTCATTTTGATTTACTTATTTTTTCTTTATTTTCTCTCTCTTTTCTTTATTTGATTTCTTTTTTGATTTTATTCC
>HWI-ST942:56:C4CFMACXX:7:1103:3069:203911
GAACTATCCATGTGGCTGAGAGCCCTCACAGCCCAGGCACAACGACGCAATTATCAGGGGCGCGCTCTACCACTGAGCTAATAGCCCGTCGTCGGGGTGC
>HWI-ST942:56:C4CFMACXX:7:1103:3246:650331
ATTTAGGGAATCGGTCTGATTCTATCTCTCTTCCTTCCGTTTGAATAAAGGAAGGATCCAAAAGAATCGATCTTTCTTTTAGTTGTTGACTCTCTCTTT
>HWI-ST942:56:C4CFMACXX:7:1103:3408:226321
GTAGTTGTGTTTAATCTTCTTTTTTTTATTGAAGAGTTTTTTTTCTATCTAAATTTAAGTATGTATCTATCAAAAAAAATAGTATATACAACAGATAACC
>HWI-ST942:56:C4CFMACXX:7:1103:3487:743951
GGCACAACGACGCAATTATCAGGGGCGCGCTCTACCACTGAGCTAATAGCCCGTCGTGCGGGGGCCCCCCCCGGGGGGCGCCCCGGCCACCCCAAAAC
>HWI-ST942:56:C4CFMACXX:7:1103:3694:555381
ATACAATAATAAAAAAAAAAAAAAGAAAAAAAAACCATTGAAACAATTATGAATTCCATTAAGTTTCCCATACTTGATCGAACAACAAAAAATTCCGTTA
>HWI-ST942:56:C4CFMACXX:7:1103:3766:349401
ATAATAATAATAATAAATTTCTTTTCATGAAAGTAAAAAAAAAAAAAAAAACGACCGTTTCGCCTTTTTCTAAAATTTAAACCAAAAAATAAAAAAAAAA
>HWI-ST942:56:C4CFMACXX:7:1103:3788:232371
TTTCTCTTTATTGGCTTTTTTTACTTCTTAGCATGATAAATAAATTTTTCTGGCTCGGCCGGGTAGTATATCCCCGCCCGAAAAAATTAGAATGAAAT
>HWI-ST942:56:C4CFMACXX:7:1103:3897:864881
GGCTTAAATTTTCAGAAATAGTCGAACGGTCGATTCTTTTTTTTTTTTTTATTTTTATGAAAAGAAATTTTTTTTTTTTATTTTTAAAACTTAGAATTCA
>HWI-ST942:56:C4CFMACXX:7:1103:3972:579111
TGTATCTATCAAAAAAAATAGTATATACAACAGATAACCTCGGCTCAAACTTTTTTTTTAAAAAAAAAAATTAGACCAGGGGAAATAAACTAATAAAAAA
>HWI-ST942:56:C4CFMACXX:7:1103:4158:962411
ACAACCAGGCCATAAATTGTTAAAGCTTCCATAAAAGCCAAACTAAGCAATAAGGACCCCGGATTTTTTCTTCTTGCTTCGGGTTGTTTCGCGTACCTTC
>HWI-ST942:56:C4CFMACXX:7:1103:4670:154811
ATTTGAATAAAATTTTACTATCAAAAAAAAAAAAAAGATTTCAATTTCTCGTCTTAAATGAAAGGAACGCATTAGACTCAGAAGTAGTATCCTAAGGGGT
>HWI-ST942:56:C4CFMACXX:7:1103:4872:363971
AGGTCTATATGTATAGTATACTATAGTTGAAGGGCAAAAATACCCCAAGGTTCATTAGATACAATAGAAATAGAATTGTATCCCCCCCTTCATTTATTGC
>HWI-ST942:56:C4CFMACXX:7:1103:5003:348841
TTCTATTAATATTTTTCCTTATCTAGTTAGAATTAATGATATTCTATATATTCTAGAACAGAATATAGCTCACATAAATAGTGACTATCATTCATCATTA
>HWI-ST942:56:C4CFMACXX:7:1103:5158:437891
TTTTACGCCCCCATGTCCCTCTCGTGTGGCGGCAGGGAGGCGTAAAAAGGAAAGAGAGAGATGGGGTTTCTCTCGCTTTTGGCTTTGCATAGCGGGCCCC
>HWI-ST942:56:C4CFMACXX:7:1103:5768:713631
ATAATTGCTATGCTTAGTGTGTGACTCGTTGGTTTAGGATTAGATAAAGATAAAAAAAAAAGAAAA
>HWI-ST942:56:C4CFMACXX:7:1103:6041:372261
ATAGTAGTTACTTTTTGTAGTTTTCTTTTTTTTTTTCAATTTTGATGAAATACTAAATAAATAAAATCAGAAAAAACTTCTATTTCGATTCTATTATAGT
>HWI-ST942:56:C4CFMACXX:7:1103:6769:168391
ATTGATTCCTACGGATTGGATCAAAGACAATTCTTGAAGGAGGTTTTCAACTTCAGGGATGAATCAAAAAAGAAATCTTTATTGGTTCTACCTCCTATTT
>HWI-ST942:56:C4CFMACXX:7:1103:6823:904301
GAGTAACTAGGACAAACTCGGTCACGTTTTCATGTTCCAACTGAACACTTTCTATTTTTGATTATTCTCAAAGGATAAGATTATTCTTTTTACCAAACAT
>HWI-ST942:56:C4CFMACXX:7:1103:6853:736401
ATAGGTTCCCTAGCAACACTTTTTTTCGTTCTATTACTAATTTCATTGGATCCTGAACCCTCGTTTTTATGACCTTTCCCCCCCCCCCCACCACCGCCCC
>HWI-ST942:56:C4CFMACXX:7:1103:6888:531641
AGAATCCATGTTTCGTATAGGATATCTTGTGGACACAACACTACAATAACAAAATTGTAGTTGTGTTTAATCTTCTTTTTTTTATTGAAGAGTTTTTTTT
>HWI-ST942:56:C4CFMACXX:7:1103:7106:538021
TTTCAGAAAATGAATTCCTATTCGAAGAGTGCATAACCGCATGGATAAGCTCACACTAACCCGTCAATTTGGGATCCAATTCGGGATTTTCCTTGAGG
>HWI-ST942:56:C4CFMACXX:7:1103:7450:309741
GGAAGTCCTTCCAGAGCCTGTTGAATAATTTTTATGGATTCTGTCATTTCGCTAAGTCGTACTAAATAACGAGCTAAGATCGGAAGAGCAACGTCT
>HWI-ST942:56:C4CFMACXX:7:1103:7524:299751
AGTCGATCTGGGGCAAGTGTTCGGATCTATTATGACATATCCATAGGGTGCTCAACGGACCCTTTTTTATAATTAAAAAAAGTTTAGCGGCTTTACCAT
>HWI-ST942:56:C4CFMACXX:7:1103:7538:220351
TCATGTATGGTTACCTGATGCCATGGAGGGCCCTACTCCCATTTCGGCTCTTATACATGCTGCTACTATGGTAGCGGCGGGGGTTTTTTTTTTTGTTTCT
>HWI-ST942:56:C4CFMACXX:7:1103:7610:43301
AAGAACCAGATTTCGTAAACAACATCGAGGAAGACTAAAAGGAATATCTTCTCGTGGGAATCGTATTTGTTTTGGCAGATATGCTCTTCAAACACTTGAC
>HWI-ST942:56:C4CFMACXX:7:1103:7746:685061
TTTCTTTTCATGAAAGTAAAAAAAAAAAAAAGAATCGACCGTTCGACTATTTCTGAAAATTTAAGCAAAAGTTGAAAAAAAAAAAAAATATTTTTGTTAT
>HWI-ST942:56:C4CFMACXX:7:1103:7777:145161
GAATTCAGATAACATTTTTTTTTGCTTTCCTGATCGGTACAATCTTATTTTGATGTCGAAAAAAAAAAGAATTCCAATTTGGGTCAAGTGAATAAATATA
>HWI-ST942:56:C4CFMACXX:7:1103:8111:325021
TTCTCATTGAGCGAAGGGGTACGAAATAAATTCAATCAGATTTATTTTTGATCAAAAAAAAAAAAAAAAACACCTTTGGAAATTTTCGTTTTTTTTTTTT
>HWI-ST942:56:C4CFMACXX:7:1103:8142:222461
GAGAAAAAAAAAACGAAGATTTCACATAGTGATTTTTTTTTTTTTTTTGTTCAAAAAAAAATTTGATTGAATTTTTTTCGTACCCCTTCCCCCAATGA
>HWI-ST942:56:C4CFMACXX:7:1103:8153:136661
AGCCGCTTTGAGGTTCCCTATTAAATTAGGCATGGAACGGAGCCACTACGAAGAAGTTCCGGGGGTTAGATCGGAAGAAGCACACGTCTGAACTCCAGTC
>HWI-ST942:56:C4CFMACXX:7:1103:8448:574541
ACCCATAGGGACTATATTGGAATTGGATTTGAATCATATTTCGGATCAATCTATATTGATTGACTGCCTCCATTATGTTGTTGCTAGCAAATACCACTCT
>HWI-ST942:56:C4CFMACXX:7:1103:8607:640791
AGAATACAATTCGCTCAAAAAGGACTTCATAAGATGTCGATCGTAAATGCGAAGACCGCTTGCGTAGAAAAAAAAAAATGGATTCCTTATCAATACAAAA
>HWI-ST942:56:C4CFMACXX:7:1103:8866:524681
TTTACGTTTCCACATCAAAGTGAAATAGAGAACTTCATTCTCTTTTTTTTTATTTCATTCCTATTGGCGGTCCAAAAGGAACTTTTTCAAGTCCTGGG
>HWI-ST942:56:C4CFMACXX:7:1103:8894:603231
CTTGGGTATTTAGGTTTGACACAGCTTCACACCCAAAAAGAAGGGAGCTACGTCTGAGTTAAACTTGGAGGTGGAAGCCTTCTTTCGTTTCTCGACGGT
>HWI-ST942:56:C4CFMACXX:7:1103:9097:504911
CTCTAAATTTTTCACCCCTTTCTGATGTTAATAACTAGAATGAAAAAAAGGGAAATGTTAATGCATCTGGAAATAAACGATTAATCTCTATTAATAAACC
>HWI-ST942:56:C4CFMACXX:7:1103:9140:874861
CTAATGCGTTCCTTTCATTTAAGACGAGAAATTGAAATCTTTTTTTTTTTTTTGGTAGTAAAATTTTATTCAAATAAAATGGAAGAGCACAACTCT
>HWI-ST942:56:C4CFMACXX:7:1103:9506:390321
ATCTTTCTTCTTAGAACGTATTGATTTGACCCCATAAGCGGGATCACCACCCCATAGCATGTTGCCGCCAGAACCCCGTATTTATTCTAGACAATACGAC
>HWI-ST942:56:C4CFMACXX:7:1103:9519:670431
GAATACACCCACAATTCTGAGCTTCATGTTACTCTTTTCAAGAGACATGTCAGATCGAGGGCATCCCAAATA
>HWI-ST942:56:C4CFMACXX:7:1103:9702:464241
CGGGATTTGAAATCACTGCTTATATACCTGGTATTGGCCATAATTTACAAGAACATTCTGTAGTCTTAGTAAGAGGGGGAAGGGTTAGATCGGAAA
>HWI-ST942:56:C4CFMACXX:7:1103:9822:95541
CACAGCCCAGGCACAACGACGCAATTATCAGGGGCGCGCTCTACCACTGAGCTAATAGCCCGTCGTAGCGGCGGCCGGCCTCGGGCGCGG
>HWI-ST942:56:C4CFMACXX:7:1103:9922:500021
GAGAGATAATTAAAGGATCCATGCGTTCCCAAAGGCGTAAAACTGTTATTTGGGAATTTTTTCAAGCAAAAGTACATTCCCCCCTTTTTTTTGATAGAAT
>HWI-ST942:56:C4CFMACXX:7:1103:9942:862621
CTTGTTTTGTTATTCTATAATATAACGAACAGAAACCTATTAAAGATAGAGAATCCGGTTAGCA
>HWI-ST942:56:C4CFMACXX:7:1104:10155:931481
CAATAGAAGTCCAACCAAAGAGGTGAATAGGGACCCAAATAACGAGTGATATGTAAGATCGGGAAGAGCACACGTCTGAACTCCAGTCACATGTCAGAAT
>HWI-ST942:56:C4CFMACXX:7:1104:10210:712751
AGAGTTCTTATGTGTCTCCACGCCCCTTTAAGACCCCGAAAAATCGACAAATTCCCTTTTCTTAGGACCACATGCGAGATAACGAAAAAAAAAACCCCA
>HWI-ST942:56:C4CFMACXX:7:1104:10822:358511
TTGTATTGTCTAAAAAAAAAAAAAAAAAAAATTTTAAAAAAAAAATAAAAAAGGGAACAAATTCCCCCTTTTTTTTTTTTTTAAAAAAAAATATATAGAA
>HWI-ST942:56:C4CFMACXX:7:1104:10833:936041
TTTTTTTATTTATGTTTGTAGGAATCTATGTGTTATACAACATTCTACCAAATGGGTCTTATAGATTCGGAAGAGCACACGTCTGAACTCCAGTCACAT
>HWI-ST942:56:C4CFMACXX:7:1104:10877:910031
GGGAAAGCGATAGAGAAAGAGAAAAAAAAAAACGAAGATTTCACATAGTGATTTTTTTTTTTTTTTTTTCAAAAAAAAAACTGATTAAATTTTTTTCGTC
>HWI-ST942:56:C4CFMACXX:7:1104:10886:508311
TGCCACTACTAATTTAGTTCCACTTACTGAGTCTTCAATTAGATTGGATAGCCGGAGAGAGATTTAAATTAATAGTTTTGAAAA
>HWI-ST942:56:C4CFMACXX:7:1104:11327:733481
AAGGTGGTCCTTGCTGATTCACACGGGATTCCACGTGCCCCATGCTACTCGGGTCAGAGCATAAGCTAGGGTTGCTTCCGGCACCTGGCCTCCCGCCACC
>HWI-ST942:56:C4CFMACXX:7:1104:11642:749401
AGCCCAGGCACAACGACGCAATTATCAGGGGCGCGCTCTACCACTGAGCTAATAGCCCGTCGTCCAGACCGGCCCCCCGGGGGCGGGCCAGGCTCGCCAC
>HWI-ST942:56:C4CFMACXX:7:1104:11841:945481
AAGACACGTATTAATTTATGACTTGTTAGTAGAATCAAACTTACATTTCTTGAAAAAAAAAAGTTCCGAGACAAGATTTTAAACCGTGAACTCCAAGGTT
>HWI-ST942:56:C4CFMACXX:7:1104:12017:809521
TATTTCACAAATACTTCCTATGGTAAGGAAGAGGGGGGGAACAAGCACACTTGGAGAGCGCAGTACAACGGAGAGTTGTATGCTGAGATCGGGAAGAGCA
>HWI-ST942:56:C4CFMACXX:7:1104:12075:739501
TGCATATAAATTAACCTTTTGTCGAACAAAGTAATCGGGGGTGTAATAAAAAAATCTGAAAAAATTTAGAAAAAACTAGAGTTGACTTAAGAAAATTAGT
>HWI-ST942:56:C4CFMACXX:7:1104:12089:459601
CTATATATATATCTATATAGTCATAGAATAGTATAGAATTATTAGAATTTCAAATTTACGAAGTAGACTTATAATTTTTTTCCATTGCACATTGTAGAAT
>HWI-ST942:56:C4CFMACXX:7:1104:12536:531471
TTAATCGTTTATTTCCAGATGCATTAACATTTCCCTTTTTTTCATTCTAGTTATTAACATCAGAAAGGGGTGAAAAATTTAGAGATACAATCAAC
>HWI-ST942:56:C4CFMACXX:7:1104:12785:278411
AGAAATCGTTTTTATTTTGATCCGATCAAAATAGGATTTAGGGATAAAGAATAAAAATAAAAAATAAGAATAAATCTAAGCCAACTTTTTCTAAATCCAA
>HWI-ST942:56:C4CFMACXX:7:1104:1280:613611
TTAGCAAAAGCTGCTCTTCGGGGTCGTATCGATTGGTTGAAAGGCCTGAAAGAAAATGTTGTTCTAGGGGGGGTGATCCCCGCCGGGACCGGTTCAACAA
>HWI-ST942:56:C4CFMACXX:7:1104:12877:961981
CTTTGCCCCTCATTCTTCGAGAATCAGAAAGAGACTTTTTCAAGTTTGAATTTGTTCATTTGGAATCTGGGTTCTTCTACTTCATTTTGATTTACTTATT
>HWI-ST942:56:C4CFMACXX:7:1104:13223:798241
AGTCAAAATGATTAATTTGAATAAAATTTTACTATCAAAAAAAAAAAAAAAGATTTCAATTTCTCGTCTTAAATGAAAGGAACGCATTAGACTCAGTA
>HWI-ST942:56:C4CFMACXX:7:1104:1381:759751	Yes
CTTTAGTATTAATATATTTTTTTTTACTCTTAGTATCAACCCAAGGCTCAATAGTTACTTTTTTTATGGATTGCCATCTCAAGTATTGCTCCTATTGGAC
>HWI-ST942:56:C4CFMACXX:7:1104:14183:977251
CAGATTTATTTTTGATCAAAAAAAAAAAAAAATCACTATGTGAAATCTTCGTTTTTTTTTTTCTCTTTCTCTATCGCTTTCCCATAAGTACAGCCCTTGT
>HWI-ST942:56:C4CFMACXX:7:1104:14415:191261
CCTAGCAACACTTTTTTTCGTTCTATTACTAATTTCATTGGATCCTGAACCCTCGTTTTTATGACCTTTCCCCCCCCCCCCCCCCCCCCCACCCCCACCC
>HWI-ST942:56:C4CFMACXX:7:1104:14893:208671
AATACGAAAAAAATTATGCATCATTCTCATACCGGTGGCAGCTTCGAATAGATCATATACAAATTCTCGTTCTCTGAAAATATAGAAAAAGGGAGTCTGT
>HWI-ST942:56:C4CFMACXX:7:1104:1491:241451
TTATCTGAATACCATCCGTTAACCAGTTTCTTGGAAATTCTGTTTCGGATAGTTGAACCCCATTAGATCGGAAGAGCACACGGTCTGAACTCCAGTCACA
>HWI-ST942:56:C4CFMACXX:7:1104:14961:219661
GGAAGAATTGGAAGGCGAAAATGAAGAAAATGTACCAATGGAGCCTGGAATTCGTTA
>HWI-ST942:56:C4CFMACXX:7:1104:15415:783811
GGAATATCGAAAATTCGAGTGGCTGAAGCTGAAGCAGCTACTTTCGAAGTAACAGAAAGAAAAGCAACGACTGGAATGGGAAGAACAGAGTCGAAAAGC
>HWI-ST942:56:C4CFMACXX:7:1104:15496:114221
GCCTTTAATTTACAAAAGTTACTAACTTTAATTTGTGATAATTTGTAAAATACATATGCTTGTGATAAAGAGCATAGGTCATAACTCATTTTTTTTTTAT
>HWI-ST942:56:C4CFMACXX:7:1104:15507:108531
CCTTCGTCCATAACCCGAGCTCGGAGAAGGAAGAGATAAGAGGGCCCTATGGAAAATGTGGTCAGAAATCCATAATAGAGTCCGACCACAACGACCGAAT
>HWI-ST942:56:C4CFMACXX:7:1104:15788:818761
ATGGGAAACTTAATGGAATTCATAATTGTTTCAATGGTTTTTTTTACTTTTTTTTTTTTATTATTTGTCACAGCTTTTGGCTAAAAGAACAAGGCCATTC
>HWI-ST942:56:C4CFMACXX:7:1104:15855:127081
TTTAAATGTCCTTCAAAAGTAAGTAAATAAATCCGAAACATATAAAATGCGGTTAATCCCGCTGTTGAACAGATCGGAAGGAGCACACGTCTGAACTCCA
>HWI-ST942:56:C4CFMACXX:7:1104:15909:442091
AGGGCATTTCCCATTTTTATAGGAACTTCTGTACCAGAAACAATGGTATCTCCAATTATAGCCCAGATCGGGAAGAGCACACGTCTGAACTCCAGTCACA
>HWI-ST942:56:C4CFMACXX:7:1104:16422:994331
CCATCCGTTTTCTGGGTTTGGAAAAGTACGGATTTTCAAGAACGGGAATCTTATGATATGTTAGGAATCACTTATGATAGCCATCCACGACTGAAACG
>HWI-ST942:56:C4CFMACXX:7:1104:16453:705741
ACACTTTTTTTCGTTCTATTACTAATTTCATTGGATCCTGAACCCTCGTTTTTATGACCTTTCCCCCCCCCCCCCCCCCCCCCACACCTCACCACATCGC
>HWI-ST942:56:C4CFMACXX:7:1104:1658:523941
ACCTGATGCCATGGAGGGCCCTACTCCCATTTCGGCTCTTATACATGCTGCTACTATGGTAGCGGCGGGGGTTTTTTTTTTTTCTCCGCCTCTTTCCTCT
>HWI-ST942:56:C4CFMACXX:7:1104:16590:295311
GCTGTTCCTAAGGGGCCCGACGAATTTTTAATTGTAATTAGAGTATTTTTTTTTTTTTATTGGGTTTTCACAATGTGGTGGTTTTCATGATTTAATGGAC
>HWI-ST942:56:C4CFMACXX:7:1104:16911:916551
ATGTGGCTGAGAGCCCTCACAGCCCAGGCACAACGACGCAATTATCAGGGGCGCGCTCTACCACTGAGCTAATAGCCCGTCGTGCGGGCCCCCCCCCCC
>HWI-ST942:56:C4CFMACXX:7:1104:16999:136671
ATTTCCAAAGGAACTGGAGTTACATCTCTTTTCCATTTCCATTCAAGAGTTCTTATGTGTTTCCACGCCCCTTTAAGACCCCGAAAAATCGACAAATTCC
>HWI-ST942:56:C4CFMACXX:7:1104:17293:742181
CATAAGAGTTTTTTTTATTTATGTTTGTAGGAATCTATGTGTTATACAACATTCTACCAAATGGGTCTTATCGAATCGAAGTTTTTAAAATAAAAAAAAA
>HWI-ST942:56:C4CFMACXX:7:1104:17435:410031
CGCGATGCCTCAGGACACGATCTAATAAATCGTTATATCGATTAGTTGGATCATAGTCTCTACCCTAAAAAATGGCGGCAGGCGCACCAGGCCCAACTAT
>HWI-ST942:56:C4CFMACXX:7:1104:17501:467491
CTATTTTTCTCTTTATTGGCTTTTTTTACTTCTTAGCATGATAAATAAATTTTTCTGGCTCCGCTGGGTAGTATAGCCCGGCCCGAAAAAATTTGAATTA
>HWI-ST942:56:C4CFMACXX:7:1104:17547:852471
ACACGAAAACTTTCTTAAAAATGATTCCCTTTCTTCTTCGTTGGGATTGGGACTAAA
>HWI-ST942:56:C4CFMACXX:7:1104:17758:210181
GGATGCAGGAATAGCGACATGGACTAAATGACCTGTCCAAGCCAATGAGCTTACCCCGAATAGTCCTGACAAATGATGATTCAGACGAGATTCAGCATTT
>HWI-ST942:56:C4CFMACXX:7:1104:17815:660261
GTCAACTACTCCTATCGGAAATAGGATTGACTACGGATTCGAGCCATAGCACATGGTTTCATAAAACCGTACGATTCTCCCGATCTAAATCA
>HWI-ST942:56:C4CFMACXX:7:1104:17979:478281
ATAGCGGGCCCCCAGCAGGAGGCCCGCACGACGGGCTATTAGCTCAGTGGTAGAGCGCGCCCCTGATAATTGCGTCGTTGTGCCTGGGCTGTGAGG
>HWI-ST942:56:C4CFMACXX:7:1104:18184:606461
AAAATAAAGAGTATTTTTTTTTTTTTCCCCATTTTCTTCATTCTTGAAAAAATATTTTTCAAGAATTTTTTTTGTTGATTTAAAAAAAAGATGGGTAGCA
>HWI-ST942:56:C4CFMACXX:7:1104:18231:753131
ACCCGTCAATTTGGGATCCAATTCGGGATTTTCCTTGAGGGATATTGGTAAGGAATTGGAATGTAATAATATCGATTCATAATGGATTCATATCGATACA
>HWI-ST942:56:C4CFMACXX:7:1104:18999:998451
GTTCATTTGGAATCTGGGTTCTTCTACTTCATTTTGATTTACTTATTTTTTCTTTATTTTCTCTCTCTTTTCTTTATTTGATTTCTTTTTTGATTTTATT
>HWI-ST942:56:C4CFMACXX:7:1104:19711:753381
ATATCATGAATAACAATATCGGAGCTATAAAATCGATTCATCGTCAAGAATTTAATAGTATAACATAGGAAGATCTTTTATCCACACCGAATACATAAT
>HWI-ST942:56:C4CFMACXX:7:1104:19866:629741
AAGGTAGCGAAATTCCTTGTCGGGTAAGTTCCGACCCGCACGAAAGGCGTAACGATCTGGGCACTGTCTCGGAGAGAGGCTCGGTGAAATAGACATGGCT
>HWI-ST942:56:C4CFMACXX:7:1104:19955:86811
TTCTGCTTCAGCGGTTAATGTCTTGGTAGAGGCTATGATTTCTTGAAAA
>HWI-ST942:56:C4CFMACXX:7:1104:20087:203371
TAAAGGATCCATGCGTTCCCAAAGGCGTAAAACTGTTATTTGGGAATTTTTTCAAGCAAAAGTACATTCCCCCCTTTTTTTTGATAGAATAGATAAACTT
>HWI-ST942:56:C4CFMACXX:7:1104:20141:335261
ACAACCACTGATGAAGGATTCCTCGAAAAGTTAAGGATTAGTAATCCGTTTTAGAAATAGAAAGGATTCGATCTTATACATA
>HWI-ST942:56:C4CFMACXX:7:1104:20289:137931
ATCCAGCTCGGCCCAATAATTAGCTGTCTACATAACCATTTTTTTTTTTTTTTCATAAATAACAAAGGAGGGGGAAGAAAAAAAGGATAAA
>HWI-ST942:56:C4CFMACXX:7:1104:20372:990681
TTTATTAATAGAGATTAATCGTTTATTTCCAGATGCATTAACATTTCCCTTTTTTTCATTCTAGTTATTAACATCAGAAAGGGGTGAAAAATTTAGA
>HWI-ST942:56:C4CFMACXX:7:1104:20445:281401
GAAATTCCTTGTCGGGTAAGTTCCGACCCGCACGAAAGGCGTAACGATCTGGGCACTGTCTCGGAGAGAGGCTCCGGGAAAAAGACAAATCTGTGAAGAA
>HWI-ST942:56:C4CFMACXX:7:1104:20932:962441
ACGTACAAAATCGAGTCGGGGTAAAGAATGCCCTCTTTCTAGCCTTTTCGTTTTTTAGAAAAAAAAAAAAAGAAAAAACCTCTTATTTAATTTCGGGAAA
>HWI-ST942:56:C4CFMACXX:7:1104:21004:995761
ATAAAATAAAGAGTATTTTTTTTTTTTTTTTTCATTTTCTTCATTCTTGTAAATATATTTATCAAGAATTTTTTTTGTTGATTCAAAAAAAAGTTTGGTA
>HWI-ST942:56:C4CFMACXX:7:1104:2557:61361
CCATGTGGCTGAGAGCCCTCACAGCCCAGGCACAACGACGCAATTATCAGGGGCGCGCTCTACCACTGAGCTAATAGCCCGTCGTGTCGGGCGCCCTCCC
>HWI-ST942:56:C4CFMACXX:7:1104:2836:316051
CTAAATGTGCAAATGTGGTGGCAGGTGCGGGGTCAGTCAAATCATCTGCAGGTACATAAACTGCTAATAGAGGTTATGGACCCCTTTTTCGTAGAAGTAA
>HWI-ST942:56:C4CFMACXX:7:1104:3557:521271
GAATGAAGAAATACTAAATCAGCGTATAACAAATTTTGAATTTTTTTTCTTTCCGGAATTTTTCTTATTTTCTAGTACATATAAAATGAAACCATG
>HWI-ST942:56:C4CFMACXX:7:1104:3649:204151
ATACAAATTCTCGTTCTCTGAAAATATAGAAAAAGGGAGTCTGTGCACCAATATCTGCCATAAAAGGGCCGAGCCATAACAGATGAGAAGCTATACGACT
>HWI-ST942:56:C4CFMACXX:7:1104:3672:22741
ATATCAGAGTAATTATGCTGGAATTGAGTCGTATAGCTTCTCATCTGTTATGGCTCCGCCCCTTTTTGTCAGATATTTGTGGCCCAACTCCCCTTTTCTA
>HWI-ST942:56:C4CFMACXX:7:1104:3920:161491
GTGGCGGCAGGGAGGCGTAAAAAGGAAAGAGAGAGATGGGGTTTCTCTCGCTTTTGGCTTGGCATAGCGGGCCCCCAGCAGGAGGCCCCCACGACGGGCT
>HWI-ST942:56:C4CFMACXX:7:1104:4259:507401
CTCGGGCCTATATGACATGACCGATCAATAGAAATACTTCAACACTCTACTTTTAGATCGGAAGAGCACAGTCTGAACTCCAGTCACATGTCAGAATCTC
>HWI-ST942:56:C4CFMACXX:7:1104:4723:60171
TACCTTGCTAAAAAATCTATCCTTGTTTACCAACCACACATTGTCTAACCA
>HWI-ST942:56:C4CFMACXX:7:1104:4736:1002571	Yes
ATGATTATTCATTCGCTTCTCACGTTCCGTGAATAGCCGGGGCATTGAGGAGTTTTATCTCCAATTAGGAAGGGGCCGGAGAAACTTTCTAGTTATGAAT
>HWI-ST942:56:C4CFMACXX:7:1104:4812:707161
ACCTGATGCCATGGAGGGCCCTACTCCCATTTCGGCTCTTATACATGCTGCTACTATGGTAGCGGCGGGGATTTTTTTTTTTTCTCCTTCTTTTCCTCCT
>HWI-ST942:56:C4CFMACXX:7:1104:4968:425241
TTCCCTTTTTTTCATTCTAGTTATTAACATCAGAAAGGGGTGAAAAATTTAGAGATACAATCAACAATCGGGGACTAACCCCCCCACCTTTTCTAATTA
>HWI-ST942:56:C4CFMACXX:7:1104:5007:162581
GTGTGATGTATATGCCATCCCGAAGTGATCTATTAATCGGCTAATAAGTCGTTTAATAGCAGAGATCGGAAGAGCACACCTGAACTCCAGTCACATGTCA
>HWI-ST942:56:C4CFMACXX:7:1104:5096:383821
ATTCCATTTGAAAACGTAAAGGCCTATTTATGTAAAATTGAGAGAATAAAAAAAAAAAAAAAAAAAATTTTTTTATTTATATTTTTTTTTTTTGAAAA
>HWI-ST942:56:C4CFMACXX:7:1104:5254:835521
ACTTATGGGAAAGCGATAGAGAAAGAGAAAAAAAAAAACGAAGATTTCACATAGTGATTTTTTTTTTTTTTTTTTTTTAAAAAAAAATTTTTTTTAATTT
>HWI-ST942:56:C4CFMACXX:7:1104:5328:764631
CTGGAGCTACAAAGATAGTTATTAAATCGTTAGCACCACATAAAAACATTCCTCCTAGAGTAGCTGTTAATATGAATACCAGAACCCCTGTATTACCAAT
>HWI-ST942:56:C4CFMACXX:7:1104:5352:672191
ACGCCCCCATGTCCCTCTCGTGTGGCGGCAGGGAGGCGTAAAAAGGAAAGAGAGAGATGGGGATTCTCTCGCTTTTGGCTTTGCATAGCGGGCCCCCAGC
>HWI-ST942:56:C4CFMACXX:7:1104:5396:684961
TTTTTATTGGTATATCAAATTCATTTCTTCTTTTTTTCTCATATCAGATAACAAAGATATAATTAAAAAATTTACTTTTTTTTTTTTTTTTTTTTTCTCA
>HWI-ST942:56:C4CFMACXX:7:1104:5445:142611
AATCGTTTATTTCCAGATGCATTAACATTTCCCTTTTTTTCATTCTAGTTATTAACATCAGAAAAGGGGGAAAAAATTATAGATACAATAAACAAAAAG
>HWI-ST942:56:C4CFMACXX:7:1104:5471:222431
ATGTGTTTTATCAATATCTCTACGTGCGATTCGTTGAAACAGAAACGTTTATTTTTACTATTCCGTTTCTTCTAGACGAATCAGTTAAAAAACGGAATAT
>HWI-ST942:56:C4CFMACXX:7:1104:5501:162541
ACAAGAACTTCTTAATTACATGTACATCTGTAATTATATATATTACTATATATAATGTAATACAATAAAGAAGAAAGAAGGAGGATTTCTAATGCGA
>HWI-ST942:56:C4CFMACXX:7:1104:5501:258951
GGAGTTCGCTCCCAGAAATATAGCTACCCCTACCCCCTCACGTCAATCCCACGAGCCTCTTATCCATTCTTATTCGATCACAGCGAGGGAGCAAGTCAAA
>HWI-ST942:56:C4CFMACXX:7:1104:5502:399981
AACCTCCTTCTTGCTTTCCTATGCGGGAGGTCTAATTCAGACTGCTGCTCAGTAATTTGTGAACAGTGGAATTTTGATACAATCTATGAAATCACGCTCT
>HWI-ST942:56:C4CFMACXX:7:1104:5559:570051
GTAAAGTCGAACTATACCCTATACCCTGAAATTTGACCTTTTTTTCTTACCCCTTCTCTGTCATTTATGCAAAAAAAAAAAAATGGTTTTGATGCAACCA
>HWI-ST942:56:C4CFMACXX:7:1104:5919:751891
GTGTGAGATATCACATTGTTCGAGGAACCCTAGATGCTGTCGGAGTAAAGGATA
>HWI-ST942:56:C4CFMACXX:7:1104:6091:995211
ATTTTGATGTCGAAAAAAAAAAAAAAACTTCCAATTTGGGTCAAGTGAATAAATATAAATGGATGGATAAAAAAACCAGTTTTCCTTATA
>HWI-ST942:56:C4CFMACXX:7:1104:6154:681301
GTAATTATATATATTACTATATATAATGTAATACAATAAAGAAGAAAGAAGGAGGATTTCTAATGCGAGATCTAAAAACATATCTTTCCGTAGCACCGGT
>HWI-ST942:56:C4CFMACXX:7:1104:6840:827301
ATGTTCACTATTTTATCGATGGCTTCCCTTGCATTGCCGGGCATGAGTGGTTTTATTGCAGAATTA
>HWI-ST942:56:C4CFMACXX:7:1104:7149:30341
GGGGTTTCTCTCGCTTTTGGCTTGGCATAGCGGGCCCCCAGCAGGAGGCCCGCACGACGGGCTATTAGCTCAGTGGTAGAGCGCGCCCCTGATAATTGC
>HWI-ST942:56:C4CFMACXX:7:1104:7308:807721
AAACATAAGAACTCAACGGGGCCCAACTCTTCCTTCTTTGTCTGATTCGAGGGGGTCCCGTTGAACTGCTAATAATCAGAACAATTTTTTATCGTGTTTT
>HWI-ST942:56:C4CFMACXX:7:1104:7488:430241
CTATCGATTCAACAAGTGCTGTACTTATGGGAAAGCGATAGAGAAAGAGAAAAAAAAAAACGAAGATTTACCTTAGTGATTTTTTTTTTTA
>HWI-ST942:56:C4CFMACXX:7:1104:7547:538021
ATTAATAATTATTTTCTTTTTTTTTTTTAGTCCAAAATAACTAAAAACATAATCAGGATTTTGTTCCATCCCTTAATCTAGATCGGAAGGGCAACGTCTA
>HWI-ST942:56:C4CFMACXX:7:1104:7588:57491
TGAAATGTTTTTTCTATTTTTTTTCTAGAATGTCTAATATCTTTTTTACATCTTCTACGTGAAAATGTTCAATTTTGATAAGGTCTTCTTGACTGTTATT
>HWI-ST942:56:C4CFMACXX:7:1104:7609:159151
GGGTTAAAGAATGCCCTCTTTCTAGCCTTTTCGTTTTTTAGAAAAAAAAAAAAAAAAAAAGCCTCTTAGTTCATTTCGGAAGAACGGGGGTTTCAAAACC
>HWI-ST942:56:C4CFMACXX:7:1104:7892:293341
GTATTGATGCTTTATTACATTGCTTTTCTTACAGTGACCTCATAGACTTTCCAAATTGGAATAATATATCATTAATATTCAATTTTTTCTCTCTTTCTTT
>HWI-ST942:56:C4CFMACXX:7:1104:7978:777751	Yes
CTTAGTATCAACCCAAGGCTCAATATCATTTGATTGAATAGTTGACCCAGCTCCTTGTTGTTTGCAGAAACCCTCCACTTCAATTGGTATTTTTTCAC
>HWI-ST942:56:C4CFMACXX:7:1104:8526:819991
TTAGATTTAGTAATTCACGTTTGTTTTATTAGTTTAATTGCACTCGGCTCAATCTTTTTTTTTTTTAAAAAAAATTAAGCCGAGGTATTTGTTTGTTTTT
>HWI-ST942:56:C4CFMACXX:7:1104:8688:631891
TAGGCCCGAATTCTACAATGGAGCTCTTATATGAAATCGGGAATTTCATTTTTTTTATTTTTTTTTGGGCAATTTTTTTAATTTTTTATTGCTCCAAGGC
>HWI-ST942:56:C4CFMACXX:7:1104:8788:283671
AAATAAAAAGGAATATCGAAAATTCGAGTGGCTGAAGCTGAAGCAGCTACTTTCGAAGTAACAGAAAGAAAAGCAACGACTGGAGTGGGAGAGTCAGAGT
>HWI-ST942:56:C4CFMACXX:7:1104:8799:346801
ATCACCTTTTGAGATTTTGAGAAGAGTTGCTCTTTGGAGAGCACAGTACGATGAAAGTTGTAAGCTGTGTTCGGGGGGGAGTTCTTGTCTATCGTTGGCC
>HWI-ST942:56:C4CFMACXX:7:1104:8800:909301
TGATGCCATGGAGGGCCCTACTCCCATTTCGGCTCTTATACATGCTGCTACTATGGTAGCGGCGGGTGATTTTTTTTTTTATCTTTCTTTTTTTCTTTTT
>HWI-ST942:56:C4CFMACXX:7:1104:9011:376171	Yes
GTGGATGAGTGGGCTCCGTAAAATCCAGTAGATTAAGGGATGGAACAAAATCCTGATTATGTTTTTAGTTATTAATGCATTCCACTTATTGAACAGGGTT
>HWI-ST942:56:C4CFMACXX:7:1104:9127:63121
TATCAACTACTGATTGGTTGAAATTGAAACCATTTAGGTTGAAAGCCATAGTACTAATACCTAAAGCAGTAAACCAAATACCTACTACCGGCCAAGCCGC
>HWI-ST942:56:C4CFMACXX:7:1104:9414:918531
TATACAACTCTACCACCCAGTCAATTCCGTTCCACTTAATCCCTATTTCATGGCCACATATCTTTCCGGCTAAGTAATGGGAAACCCTTCTCCTGTTACA
>HWI-ST942:56:C4CFMACXX:7:1104:9526:570541
GACCATCCTACCTCCTCTACGTTCTTGACAGCCCATCTTTGTCTCAGTAGAGTCTTTCAGTGGCATGTTTA
>HWI-ST942:56:C4CFMACXX:7:1105:10023:889991
ATAGAATCTTTGAAAAAGACTTTTTCATACTTCATAAAAAAGAAAAAGACTTACGGCTTTTAGGTCTTGAGCCTCAACCCCTCTTCAAACCTTCCGG
>HWI-ST942:56:C4CFMACXX:7:1105:10140:659821
TTTCAAGCAAAAGTACATTCCCCCCTTTTTTTTGATAGAATAGATAAACTTTTTTTTTTTTCGTTTGATATTTGGGGGCTAAAAAAAAAAATTTTTAAAA
>HWI-ST942:56:C4CFMACXX:7:1105:10240:667821
ACGAAATAAATTCAATCAGATTTATTTTTGATCAAAAAAAAAAAAAAAATCACTATGTGAAATCTTCGTTTTTTTTTTTTTTTTTTTA
>HWI-ST942:56:C4CFMACXX:7:1105:10280:167861
ATAAGTTTGATCCTATAGAATCTGACCCATTTTCTCATTGAGCGAAGGGGAACGAAATAAATCCATCCAGATTAATTTTGATTCAAAAAAATGGGAAAAC
>HWI-ST942:56:C4CFMACXX:7:1105:10459:575171
AACTGTATTGTTACTTTTGCTACCATCAGGATAAATCTGACCCCTTCCCCTGTTTCCACCTACATATATAAGATCGGAAAGAGCACACGTCTGAACTCCA
>HWI-ST942:56:C4CFMACXX:7:1105:10640:477091
CAGCATATTTTTTGAAGCCCCGTAACTCTTCCTCAGCCAGGCTTGGGCAGAATAGCGGAGCAAGTATA
>HWI-ST942:56:C4CFMACXX:7:1105:10853:874791
GCATTTCGATTAGGGTCGTATTCTATGGTTACGATTCTACCATATATGTCTTTTGCATTTCGTCGAAAATCTATTTTACGGTATAGACGCTTATGACCTC
>HWI-ST942:56:C4CFMACXX:7:1105:10913:272641
AAGATTTTTTAGATCGGCTGAGACCGAATCATATCACCTTTTTTTTTTATTTTAAAAACTTCGTTTCGATAAGACCAATTTGTTAGATTTTTTAAAAA
>HWI-ST942:56:C4CFMACXX:7:1105:11110:989081
GAGGACTTGACGTCATCCCCACCTTCCTCCGGTTTGTCACCGGCAGTCCCATTAAAGTGCCCAACTAAATGATGGCAATTAATGGCAAGGGTTGC
>HWI-ST942:56:C4CFMACXX:7:1105:11203:120211
TAAATAATAAAAAATTACTATATATTTTTTATTAGAAAAAAAATAAGGTGGAATTTGCTACCTTTTTTTATTTTTTATTGAAATTTGTATTTTTTTTTTT
>HWI-ST942:56:C4CFMACXX:7:1105:11552:105301
TTTAGATCGGCTGAGACCGAATCATATCACCTTTTTTTTTTTTTTTTAAAAACTTCGTTTCGAAAAAACCCATTTGGTAAAATTTTGTATAACAAATAAT
>HWI-ST942:56:C4CFMACXX:7:1105:11617:770761
CCATACACTGATAAGGGATGTATGGATTCTCGAGAAGAGAGGAGCCATAGTGGTCCCCTCCGGACCGCCCGGATAGATCGGGAAGAGCACACGTCT
>HWI-ST942:56:C4CFMACXX:7:1105:12092:716371
AATAAAAAAATAGGATGTCTAATTATTTTTCGTAATCGAAAACCACGATGGGCTTAAATACTTTTTTTTTTTTGGGGGTTTTTTTTAAAAGGGTTAAGTT
>HWI-ST942:56:C4CFMACXX:7:1105:12359:631611
CTTCTGGAAATCCTAGCTATTCTTAGCATGATATTCGGGAATCTCATTGCTATTATCCAACAAGCCTGAAAACGATGCTTGCATATTTGGTCATAGGTCA
>HWI-ST942:56:C4CFMACXX:7:1105:12429:403471
TGCATTACTTATAGCTTCCTTCTTCGTAGCCAAGCTGATTCGGAATTGTCTTTCATTCCAAGTCATAACTTGTATCCATGCGCTTCATATTCGCATGGA
>HWI-ST942:56:C4CFMACXX:7:1105:12518:842821
TTTAAAATTAAATTATTGAATATTTCGAACAAATCCTGAAATTCAAAACTGCCAGTTATCCAATAAAGACCTAAAATTCCTAATAATAAACCAAAATCCC
>HWI-ST942:56:C4CFMACXX:7:1105:1266:590491
GGCTACATCCGCCCCTACGCTACTATCTATTCTTTTTTGTATTGTCTAAAAAAAAAAAAAAAAAAAAATTTAATAAAAAAAAAAAAAAAAAGTAACAAAT
>HWI-ST942:56:C4CFMACXX:7:1105:12953:833861
TTTTTTTATTGGATATTAAATTTTTTATAGTCGAAATAAAATAAAGAGTATTTTTTTTTTTTTTTCCATTTTTTTCATTTTTTTAAAATTATTTTTCAAA
>HWI-ST942:56:C4CFMACXX:7:1105:13119:569431
GAAGAAAGAACAAGATGTTTCTTTTGTCCCTTCCAGGCGATCGGAAAATAAAGAAATAGTTA
>HWI-ST942:56:C4CFMACXX:7:1105:13321:779411
GTTCTATTACTAATTTCATTGGATCCTGAACCCTCGTTTTTATGACCTTTCCCCCCCCCCCCCCACCCTCCCTTATTCCCATCTCTTTATTTCATTTTCT
>HWI-ST942:56:C4CFMACXX:7:1105:13720:83571
GACGGTGAAGTAAGACCAAACCCATGAGCTTATTATCCTAGGTCGGAACAAGTTGATAGGATCCCCTTTTACGCCCCCATGTCCCTCTCGTGTGGCGGCA
>HWI-ST942:56:C4CFMACXX:7:1105:13847:696121
AGGCACATTGCGAACGTAAATAATTGTAACCATATACATATAAAATTACAGCAATAGAATGCCAAACTTCTGGCTTTATTTTTTAATTCTATTTTCCTTT
>HWI-ST942:56:C4CFMACXX:7:1105:13940:224011
TATTGGATGGGTTACTTTTTATTGGCATTGGAAACACATCACATTATGGCAGGGGAACGTTTCACAGGTTTATGAATCTTTCCCTTATTTTATTGGGTG
>HWI-ST942:56:C4CFMACXX:7:1105:14026:543581
AGAGAAAAAAAAAAACGAAGATTTCACATAGTGATTTTTTTTTTTTTTTTTTTCAAAAAAAAATTTGATTAAATTTT
>HWI-ST942:56:C4CFMACXX:7:1105:14048:622491
ATATATGTTCTTTTTTTTTTCATCTTTGGCTTAAATTTTCAGAAATAGTCGAACGGTCGATTCTTTTTTTTTTTTTTTTTTTTTTAAAAAAAATTTTTTT
>HWI-ST942:56:C4CFMACXX:7:1105:14160:333071
CAATCGAATCACTGTTCGCGACCCAGGATTCTATTTTATCATCAATCCAATCACCGCTCACGTTTTTTCTTTTTCTTAGATCGGAAGGAGCACACGTCT
>HWI-ST942:56:C4CFMACXX:7:1105:14212:480111
TAGACATGTCTGTGAAGATGCGGACTACCTGCACCTGGACAGAAAGACCCTATGAAGCTTCACTGTTCCCTGGGATTGGCTTTGGGCTTTTCCTGCGCA
>HWI-ST942:56:C4CFMACXX:7:1105:14482:775381
GTCCCTCTCGTGTGGCGGCAGGGAGGCGTAAAAAGGAAAGAGAGAGATGGGGTTTCTCTCGCTTTTGGCTTGGCATAGCGGGCCCCCAGCAGGAGGCCC
>HWI-ST942:56:C4CFMACXX:7:1105:14552:837541
CGACTGGGCGTATTGTATGTGCCAATTGCCATTTAGCTAATAAGCCCGTGGATATTGAGGTTCCACAAACGGTACTCCTTGTTCCTGAATTTGAGCCGGT
>HWI-ST942:56:C4CFMACXX:7:1105:14634:838201
GTAGGAGTTAAAAAAATACTATGATGGTTCCGTTGCTTTATATATCATTGTTTTGATTCGTCGATGATTCAGCAATCCCAAAGTGTCTTTTTTTTTTTTT
>HWI-ST942:56:C4CFMACXX:7:1105:14837:257601
ATCTCGTTTTTTTACTAACCTCCTTCTTGCTTTCCTATGCGGGAGGTCTAATTCAGACTGCTGCTCAGTAATTTGTGAACAGTGGAATTTTGATAC
>HWI-ST942:56:C4CFMACXX:7:1105:14862:578261
ATCTATATTTGAAATATCTATACATATGCAAGCAAGGGAGGAAAATGAACTTTTTTTTGTTTGTCTAGTCTAATTTGAACTTCCCCCCCAAAAAAATTCA
>HWI-ST942:56:C4CFMACXX:7:1105:14864:981281
GCTACATCCAGTACCGGACCAATGATTTGGGCGATACGTCCCAGGTTTTTTTTTTAACTTATCGAAACCTCTGGATTTGAAGTAGTAAGATGGGAGAA
>HWI-ST942:56:C4CFMACXX:7:1105:14951:785821
GAGAATAGAAAGTTTTTAGTCCTTTCGCAGGAGTAAGGATTTAGGGTTAGTGCGAATTAATAAGTTGGAACAACTTCGTAAGTCTTTTTATATTGAAAAA
>HWI-ST942:56:C4CFMACXX:7:1105:14997:473491
GTCCCTGAAAAAATTCTATCCCCTAAACGACGTAGAGAATTTCGAATTCTAATTTGTTTCAACTTAAAAAAAAAAAATTGCAAGGAAACAAATTTCAGGT
>HWI-ST942:56:C4CFMACXX:7:1105:15262:995271
TATCGATTCATAATGGATTCATATCGATACAGAAGAAAAGGTTCTCTATCGATTCAACAAGTGCTGTACTTATGGGAAAGCGATAGAGAAAGAGAAAAAA
>HWI-ST942:56:C4CFMACXX:7:1105:15358:177301
TGGAATCTGGGTTCTTCTACTTCATTTTGATTTACTTATTTTTTCTTTATTTTCTCTCTCTTTTCTTTATTTGATTTCTTTTTTGATTTTATTCCCTTCC
>HWI-ST942:56:C4CFMACXX:7:1105:15485:719471
TATTAAAATTAAAAAATAAATAAAAAAAAATCTAAAAATCGTCTAGTACGGAATCTTTTCAAGAAGTGATTGGTCTAACATAAAAAAAAAAAAAAAAAAA
>HWI-ST942:56:C4CFMACXX:7:1105:15539:707171
ATACAAGTGTTTCTTACATAATGTAAACCAACTATTCTATAATTAATTGGGCTAACCTAAAAAAGAATATTAAAAAAAAAACATTTAAGATTAACTTTCA
>HWI-ST942:56:C4CFMACXX:7:1105:15545:374431
AATACTATTGGATGGGTTACTTTTTATTGGCATTGGAAACACATCACATTATGGCAGGGGCAAGTTTGCCAGTTTAAAGAATCTTCCACTTATTTTGTG
>HWI-ST942:56:C4CFMACXX:7:1105:15819:422841
TGATTTTATTCCCTTCCATCATTCTTAAGTCCCATAAGTTTGATCCTATAGAATCTGACCCATTTTCTCATTGAGCGAAGGGGTACGAAATAAATTCAAT
>HWI-ST942:56:C4CFMACXX:7:1105:1584:664741
AAAGCACTGTTTCGGTGCGGGCCGCGAGAGCGGTACCAAATCGAGGCAAACTCTGAATACTAGATATGACCTCAAAATAACTGGGGGTTCATAACTACTC
>HWI-ST942:56:C4CFMACXX:7:1105:15984:1007201
ACTGATCATCGCCTTGGTAAGCTATTGCCTCACCAACTAGCTAATCAGACGCGAGNCCCTCCTCGGGCGGATTCCTCCTTTTGCTCCNCAGCCTACGGG
>HWI-ST942:56:C4CFMACXX:7:1105:16088:104951
GATTGGAATTGACTAAGCGGGTATTTTTTCCACATTCATAGGAGTTCGTCTATGTTTCTGCTTTACGAATATGATATTTTAGATCGGGAAGAGCACACGT
>HWI-ST942:56:C4CFMACXX:7:1105:16101:984041
AGGATACTACTACTGAGTCTAATGCGTTCCTTTCATTTAAGACGAGAAATTGAAATCTTTTTTTTTTTTTTTTTTGGAAAAATTTTTTTAAATTTAATCT
>HWI-ST942:56:C4CFMACXX:7:1105:16127:626071
GTGAAATAGACATGTCTGTGAAGATGCGGACTACCTGCACCTGGACAGAAAGACCCTATGAAGCTTCACTGTTCCCTGGGATTGGCTTTGGGCTTTTCCT
>HWI-ST942:56:C4CFMACXX:7:1105:16419:226781
ATTTCCCTTCAACTCCACAATATTTTATTATTTTTGACATAAAAAGTTGAAGGGAATTCTATGAAGAGATAATGGATTATGGGAGTGTGTA
>HWI-ST942:56:C4CFMACXX:7:1105:16457:622121
TTCACTGTTCCCTGGGATTGGCTTTGGGCTTTTCCTGCGCAGCTTAGGTGGAAGGCGAAGTAGGCCCCCTTCCGGGGGGGCCCGAGCCATCAGTGA
>HWI-ST942:56:C4CFMACXX:7:1105:16566:155101
TAATAAAACGATTCAATATCACCGAAGTCATGTCTAAACCTAAAGATTCAAAGTAAGATAAAAAAACTTTAAAAAAAGAAAATCTGGTTTCAATTGTTT
>HWI-ST942:56:C4CFMACXX:7:1105:16658:867751
TCCTTAATTCTGTGAATATATTTAATGGTGGACGAAAAAAAGGTTTCTTATATTTTTTGATCTTTAATTGGAATTTTGGTAAAAGGAAGGGTGAAATTTA
>HWI-ST942:56:C4CFMACXX:7:1105:16768:230021
AAAAAAAGAAAAAAAGAGGGTTAAGTTTCGTTTTTTTTTTACTTTCCTTGATAGATTGCCTCATCTCATTGTTAAGAAATAGTAGTATCCCTGTCTAACA
>HWI-ST942:56:C4CFMACXX:7:1105:16881:183331
ACTGTTATTATACCTATCAAAGATATTATATACATTATAGAAGGGATAACGATAAAAAGAGGAAGAAGACGAGCTACAAGAAAAATACCCGCCGCTACCA
>HWI-ST942:56:C4CFMACXX:7:1105:1700:485691
GATATTATATACATTATAGAAGGGATAACGATAAAAAGAGGAAGAAGACGAGCTACAAGAAAAATACCCGCCGCTACCATAGTAGCAGCATGTATAAGAC
>HWI-ST942:56:C4CFMACXX:7:1105:17070:990501
ATGAAGATAATAAATTCGGTCGTTGTGGTCGGACTCTATTATGGATTTCTGACCACATTTTCCATAGGGCCCTCTTATCTCTTCCTTCAGATCGGGAA
>HWI-ST942:56:C4CFMACXX:7:1105:17224:23241
TTCTTTATTTTCTCTCTCTTTTCTTTATTTGATTTCTTTTTTGATTTTATTCCCTTCCATCATTCTTAAGTCCCATAAGTTTGATCCTATAGAATCTGAC
>HWI-ST942:56:C4CFMACXX:7:1105:17340:463281
AAAGCATCTAAGTAGTAAGCCCACCCCAAGATGAGTGCTCTCCTATTCCGACTTCCCCAGAGCCTCCGGTAGCACAGCCGAGACAGCAACGGGTTCTCC
>HWI-ST942:56:C4CFMACXX:7:1105:1744:399851
AAAGAGAAAAAAAAAAACGAAGATTTCACATAGTGATTTTTTTTTTTTTTTTTGTTAAAAAAAAAATTTATTTAATTTTTTTTTTAACCCCTTCCCTCAT
>HWI-ST942:56:C4CFMACXX:7:1105:17727:636361
TAACAATAGGTCCTGGAGATTTCTTGGTTCATCATGCTATTGCTTTAGGTTTACATACAACTACATTGATCTTAGTAAAAGGTGCTTTAGATGCACGTG
>HWI-ST942:56:C4CFMACXX:7:1105:17754:263211
AAACGATTAAATTATGGAAGTAAATATTCTTGCATTTATTGCTACTGCACTCTTCATTCTCGTTCCTACTGCTTTTTTGCTTATAATTTACGTAAAAACC
>HWI-ST942:56:C4CFMACXX:7:1105:18091:773011
AAGAGACATAAAACCATCCATTCGGGTTCTATATTTGTTCGAATAAAATGCTTAGATCGGAAGAGCACACGTCGAACTCCAGTCACATGTCAGAATCTC
>HWI-ST942:56:C4CFMACXX:7:1105:18260:351131
ATTGTAGAATAGGCTAAACCCCGCTTAATGTCTTTTTGAGCAAGAGCTAAAGTGGCTCCTAAGAGTACTGTTATTATACCTATCAAAGATATTATATACA
>HWI-ST942:56:C4CFMACXX:7:1105:18355:138951
TTTAACTCCTACAAAAAAAAGAAGGATGGTAATTGGATGATTTAAGGAAAGGTCAAAAGAGTCAATTCCATTGTGGAGCCGTATGCAATGCACAAAAAAA
>HWI-ST942:56:C4CFMACXX:7:1105:18572:1006301
AAGGGGTACGAAATAAATTCAATCAGATTTATTTTTGATCAAAAAAAAAAAAAAAATCACTATGTAAAATTTTTGTTTTTTTTTTTTTCTTTTTTTTTGT
>HWI-ST942:56:C4CFMACXX:7:1105:19122:153591
AAGTCAAAGGGTCGAGAAACTCAAGGCCACTATTCTTGAACAACTTGGATTGGAGCCGGGCTTTCCTTTCGCACTTTATACGGGTATGAAATGAAAATAA
>HWI-ST942:56:C4CFMACXX:7:1105:19416:778621	Yes
GGGGACTGGAGCAGGCTACCACGAGACAAAAGATCTAGAAACATGTGAAGTGTATGGCTAACCCAATAACGAAAGTTTCGTAAGGGGACTGGAGCAGGCT
>HWI-ST942:56:C4CFMACXX:7:1105:19693:398851
GGTGGAAGGCGAAGAAGGCCCCCTTCCGGGGGGGCCCGAGCCATCAGTGAGAGACCACTCTGGAAGAGCTAGAATTCTAACCTTGTGCCAGGACCTACC
>HWI-ST942:56:C4CFMACXX:7:1105:1971:55581
TCTTTATCATTTTTTTTCATTTATATGAAAAAAAATTGTTAAAAAAATGTTTTTTGAAAAAAAAAAACTTCTTTAAAATTCTTAGGAATTTTTAATAAAA
>HWI-ST942:56:C4CFMACXX:7:1105:19785:347791
AAGCTCTTTGTGTACCAATGTAAAGGCGCTAAAACTTTTTTTAATTATAAAAAAGGGTCCGTTGAGCACCCTAGATCGGAAAGAGCACACGTCTGAACTC
>HWI-ST942:56:C4CFMACXX:7:1105:20012:797131
TAGTAGTATCCCTGTCTAACACTAATCCAAGAAAGTCAGCCAGAATCCATCTTCTAATTAGGGAAAAAGGTGGATTTATAAGTTAAGTTATCAAAAATTT
>HWI-ST942:56:C4CFMACXX:7:1105:20021:391251
GAAAAGAAAGCAAAAGCGATTCCCGTAGTAGCGGCGAGCGAAATGGGAGCAGCCTAAACCGTGAAAACGGGGCTGATGGAGCGCAAAAAAAAAGTCGTGC
>HWI-ST942:56:C4CFMACXX:7:1105:2008:359011
AATTCTATCCCCTAAACGACGTAGAGAATTTCGAATTCTAATTTGTTTCAACTTAAAAAAAAAAAATCTAAGGAAACAAAATTAAGATTTTGTAAAGAAT
>HWI-ST942:56:C4CFMACXX:7:1105:2011:1006701	Yes
GATAACAAATCCAGTCTTTCACTAAGATTTATATCATTTGATTGAATAGTTGACCCAGCTCCTTGTTGTTTGCAGAAACCCTCCACTTCAATTGGTATTT
>HWI-ST942:56:C4CFMACXX:7:1105:20144:185881
ATTATACACAAAAGATCCTTTTTTGGCTCTCTCTTTAGCTCTATGTCTCTTATCCCTAGGAGGTCTTCCTCCACTAGCAGGTTTTTTTGGAAAACTCCAT
>HWI-ST942:56:C4CFMACXX:7:1105:20162:609571
AGGCACTGTACGAAGTATTTGAAATACAGGAAAGAAATACCATTCAGGTAATATTTCCAGAGGCGGCGCAAGAATATCCACAGTCTCACCTCTCAGATAT
>HWI-ST942:56:C4CFMACXX:7:1105:20376:76531
ATCTGACCCATTTTCTCATTGAGCGAAGGGGTACGAAATAAATTCAATCAGATTTATTTTTGATCAAAAAAAAAAAAAAAAAACATTATGGAAAACTTTT
>HWI-ST942:56:C4CFMACXX:7:1105:20541:222891
TTTTCCAAATGAAATTTTTAATAATTTTTTTTTTTAGCCCCCATATATAAAACGAAAAAAAAAAAAGTTATTTTTTTTTTTAAAAAAAAAGGGGGGAAT
>HWI-ST942:56:C4CFMACXX:7:1105:20700:237351
ACAAGCTCGTAATGAGGGACGTGATCTTGCAGTCGAGGGTAATGAAATTATCCGTGAAGCTTGCAAATGGAGTCCTGAACTAGCTGCTGCTTGTGAAGTA
>HWI-ST942:56:C4CFMACXX:7:1105:20828:708181
GTTACATGAAATGCGCCAAAACCGAAGCAAGCCACTCCTGAAAGAA
>HWI-ST942:56:C4CFMACXX:7:1105:21224:350981
AAGGGATGGAACAAAATCCTGATTATGTTTTTAGTTATTTTGGACTAAAAAAAAAAAAAAAAAAAATTTTTAAAGGAAAAAGAATGAAAATGAATTATTT
>HWI-ST942:56:C4CFMACXX:7:1105:21330:901981
TGTTCCCTTCCATTATGAATAGCGATCGTATGGCCAATCATTGTGGGTATAATGGTGGATGCCCGGGACCAAGTTATTATGATTTCTTTTTCCGCCTTT
>HWI-ST942:56:C4CFMACXX:7:1105:2238:699171
CAATAAGAATGCTAGTTCTTACTGTTCATATGTTATGATATGAATATACCACACCAATTCGTTATGTATAGATCGGAAGAGCACCACGTCTGAACTCCA
>HWI-ST942:56:C4CFMACXX:7:1105:2484:177031
AAAGAGTAGTATGAGATAAGGAAGAGGTTTTTCAAATGATATCTTACCTATTCGGGCACATTTCAGCGTCACAAACTTTGTTTTCACACCGTAAAAAAAA
>HWI-ST942:56:C4CFMACXX:7:1105:2610:614891
ATGAGATGAGGCAATCTATCAAGGAAAGTAAAAAAAAAACGAAACTTAACCCTCTTTTTTTCTTTTTTTTTTTTTTTTTTAACCAAACCCTTTTTTAAAA
>HWI-ST942:56:C4CFMACXX:7:1105:2639:554101
ATTTGCACATATAGGACAAATGAACCAAATACCCGTCTTTTTTTACTACTCCTTCTTTTTTTTCAATTCAGTTCTTTCACTTGTCTTCTGTCAAATAGTC
>HWI-ST942:56:C4CFMACXX:7:1105:2647:508111
TTTTTCATTCTAGTTATTAACATCAGAAAGGGGTGAAAAATTTAGAGATACAATCAACAATCGGGGACTAACCCCCCCACCTTTTCTAATTAGTAGAATA
>HWI-ST942:56:C4CFMACXX:7:1105:2715:614561
ATGTGGCTGAGAGCCCTCACAGCCCAGGCACAACGACGCAATTATCAGGGGCGCGCTCTACCACTGAGCTAATAGCCCGTCGTGTGATGCGCCCGCCCG
>HWI-ST942:56:C4CFMACXX:7:1105:2881:894741
AAGCGATAGAGAAAGAGAAAAAAAAAAACGAAGATTTCACATAGTGATTTTTTTTTTTTTTTTTTTATAAAAAAAAAATCTATTTAAATTTTTTTCTTAC
>HWI-ST942:56:C4CFMACXX:7:1105:2912:768761
CTAAGTTTCAATAATAATAATAATAAATTTCTTTTCATGAAAGTAAAAAAAAAAAAAAGAAAGACCGTTCGGACTTTTCCTGAAAATTAAGGCAAAGAAA
>HWI-ST942:56:C4CFMACXX:7:1105:3112:430881
AAAGCCCCCAGACGGCGTATTTTTTTAAAACGAGGCCCTCGGTAACGTGACATAAAGACTCCTTTTTGATTTGAATTTGACAAAACCTAATTAAAATTAA
>HWI-ST942:56:C4CFMACXX:7:1105:3241:246671
TATGATTTCTTTGTCCCTGAAAAAATTCTATCCCCTAAACGACGTAGAGAATTTCGAATTCTAATTTGTTTCAACTTAAAAAAAAAATGCTAGGGATACA
>HWI-ST942:56:C4CFMACXX:7:1105:3244:700891
GAATGACCCCTTCTCATAATGAGAATGTATATAACCTTATTCCGGTCTGGTCCGGTATGGAATGAACTTATAATCATGGAATCGACTCGATCATCA
>HWI-ST942:56:C4CFMACXX:7:1105:3264:833871
TTTCGCAACTCAATCATGTATGATGGAATCATCAAAGATTTGATCTTTTCGAACTCTGTCTGTAACTCACTATAGGCTCGGGAAACAAAGAGAAGATGT
>HWI-ST942:56:C4CFMACXX:7:1105:3403:551891
ACGAAATAAATTCAATCAGATTTATTTTTGATCAAAAAAAAAAAAAAAATCACTATGTGAAATCTTCGTTTTTTTTTTTCTCTTTCTTTATCGCTTTCCC
>HWI-ST942:56:C4CFMACXX:7:1105:3556:590271
AGATATTATATATAATATATAGAAATGGAAATAATAGATAAATATCAATATAGATATATTTATATTGCGTCCAATAGGATTTGAACCTTTGGTATAGGTT
>HWI-ST942:56:C4CFMACXX:7:1105:3647:36051
CTATACCCTATACCCTGAAATTTGACCTTTTTTTCTTACCCCTTCTCTGTCATTTATGCAAAAAAAAAAAAAGGTTATGTAGACAGCTAATTATTTGGCC
>HWI-ST942:56:C4CFMACXX:7:1105:4167:813281	Yes
ACAAAACATTTTCTTCGTGCGGTGGTAAAAAAAAACATGCTTTTTTGGAGAGAGATACTATTTCACCTTCGTCAATCCTCCTTTATGATGGATGGAGAAA
>HWI-ST942:56:C4CFMACXX:7:1105:4335:957151
CTATCGAAAAAGATCACCAATCCAAGATAAAAATATTCGGAGGATTCTTCTGACCAATGAAAAATTAATAATTGTCAGCAAAGTTGTTTCTTTTTTTCTT
>HWI-ST942:56:C4CFMACXX:7:1105:4460:457961
AAATAGAGTGAAATTAGAATCTAATGGATATGAATTGATGTAGATACAATTATTAGTATTAGGCTGTTTTCTCTTTTTTAGATCGGAAGAGCAACGTCT
>HWI-ST942:56:C4CFMACXX:7:1105:4659:637401
ATCTCGTTTTTTTACTAACCTCCTTCTTGCTTTCCTATGCGGGAGGTCTAATTCAGACTGCTGCTCAGTAATTTGTGAACAGTGGAATTTTGATAC
>HWI-ST942:56:C4CFMACXX:7:1105:4717:595891
TATAGAGAAAACAAGTACGAAGTTCAATTTGAAATAAAAAAATTGAAAGGGTTTATCATCTTTTTGGAAAACAAAGAAAGGGAATGTAGATCGGAAAGA
>HWI-ST942:56:C4CFMACXX:7:1105:4978:894841
ATACATTATAGAAGGGATAACGATAAAAAGAGGAAGAAGACGAGCTACAAGAAAAATACCCGCCGCTACCATAGTAGCAGCATGTATAAGAGCCGAAAT
>HWI-ST942:56:C4CFMACXX:7:1105:5020:159461
TTGGATTTGCCCAAGATTTTTGGAATTCATTTATTTCTTTCAGGAGTGGCTTTCTTCCGCGTTTGCGCATTTTCTGTAACAGGATTATATGGTCCTGGG
>HWI-ST942:56:C4CFMACXX:7:1105:5589:979421
CGTAAGACTCATAACGATCAATTTTACGAAGATCCCATGGTATTCCGGATGCGCGTAGCATTGGTCCGGATAAACCCCAATTTATTGCTTCTTCCCCACC
>HWI-ST942:56:C4CFMACXX:7:1105:5784:179051
ATCAATAGGGTTAGCCAAGGCGTTTATAACACGCCCCAAATAAGCCTCACTCACCGGTATCTGAGCAATTTTTCCCGTAGCTTTGACTGAACTTCCTTCT
>HWI-ST942:56:C4CFMACXX:7:1105:5866:101701
ATACGGAGCTGGAGCTTCTAACTATGATGAATGCGCTAACTATGGATATGATGTTGGAAATAGACCGATTTTATAGATCGGAAGAGCACCACGTCT
>HWI-ST942:56:C4CFMACXX:7:1105:5968:212791
ATGAAATCACGCTCTGTAGGATTTGAACCTACGACATTGGGTTTTGGAGACCCACGTTCTACCGAACTGAACTAAGAGCGTTTTTCTTTTTTTTTTTCTA
>HWI-ST942:56:C4CFMACXX:7:1105:6051:852651
GTCTGAGTTAAACTTGGAGGTGGAAGCCTTCTTTCGTTTCTCGACGGTGAAGTAAGACCAAACCCATGAGCTTATTATCCTAGGTCGGAACAAGTT
>HWI-ST942:56:C4CFMACXX:7:1105:6103:539721
GAAGGGGTACGAAATAAATTCAATCAGATTTATTTTTGATCAAAAAAAAAAAAAAAAATCACTATGTGAAATCTTCGTTTTTTTTTTTTTTTTTTTTTTC
>HWI-ST942:56:C4CFMACXX:7:1105:6215:994161
ACAAATATTAAATTGAGGTACCCATTTTATGACAACTTTCAATAACTTACCCTCTATTTTTGTGCCTTTAGTAGGCCTAGTCTTTCCGGCAATTGCAAT
>HWI-ST942:56:C4CFMACXX:7:1105:6370:931541
TATAATTTTTTTCCATTGCACATTGTAGAATTCTAAGTTTCAATAATAATAATAATAAATTTCTTTTCATGAAAGTAAAAAAAAAAAAAGAATCGACCGT
>HWI-ST942:56:C4CFMACXX:7:1105:6462:887811
GAAGGATGAAAGAAAGAGAGAAAAAATTGAATATTAATGATATATTATTCCAATTTGGAAAGTCTATGAGGTCAGATCGGAAGAGCACCGTCTGAACTCC
>HWI-ST942:56:C4CFMACXX:7:1105:6568:417881
AACTCCCCTTTTCCATTAAAAATAAAAAGGCACAAGGTAAGGAATTTTTCCAAAAAATATTTTTCCAATCATTGTACCTTGGATTGGTAGGAG
>HWI-ST942:56:C4CFMACXX:7:1105:7256:766771
ATAGAATCTGACCCATTTTCTCATTGAGCGAAGGGGTACGAAATAAATTCAATCAGATTTATTTTTGATCAAAAAAAAAAAAAAATCACTATGTGA
>HWI-ST942:56:C4CFMACXX:7:1105:7312:771431
TCTTGGCAGCTATTTGGCATTGGGTATATTGGGATCTAGAAATTTTTTGTGATGAACGTACAGGAAAACCTTCTTTGGATTTGCCCAAGATTTTTGGAAT
>HWI-ST942:56:C4CFMACXX:7:1105:7351:658351
CATAAGTTTGATCCTATAGAATCTGACCCATTTTCTCATTGAGCGAAGGGGTACGAAATAAATTCAATCAGATTTATTTTTGATCAAAAAAAAAAAAAAA
>HWI-ST942:56:C4CFMACXX:7:1105:7382:510291
CAACAATCGGGGACTAACCCCCCCACCTTTTCTAATTAGTAGAATAAATTAGAAAAGGTGGGGGGGGGGGGGAAAGGGAAAAAAAAAAAGGGTTCGGGCA
>HWI-ST942:56:C4CFMACXX:7:1105:7584:475521
ATGCATATGTTATATTCAAGAACAGCCTTTAATTTACAAAAGTTACTAACTTTAATTTGTGATAATTTGTAAAATACATATGCTTGTGATAAAGAGCATA
>HWI-ST942:56:C4CFMACXX:7:1105:7783:84131
AAAACCGGCTTGATTTAGATCGGGAGAATCGTACGGATTTATGAAACCATGTGCTATGGCTCCAATCCGCAGTCAATCCCATTTCCTCTATGAGCAGTTA
>HWI-ST942:56:C4CFMACXX:7:1105:8067:565381
TTCAATAATAATAATAATAAATTTCTTTTCATGAAAGTAAAAAAAAAAAAAAAAATAAACCGTTCGACTTTTTTTAAAAATTAAACCAAAAATGGAAAC
>HWI-ST942:56:C4CFMACXX:7:1105:8106:987241
AGAATCTGACCCATTTTCTCATTGAGCGAAGGGGTACGAAATAAATTCAATCAGATTTATTTTTGATCAAAAAAAAAAAAAAAATCACTATGTGAAATCT
>HWI-ST942:56:C4CFMACXX:7:1105:8456:61561
ATTTTCTCATTGAGCGAAGGGGTACGAAATAAATTCAATCAGATTTATTTTTGATCAAAAAAAAAAAAAAATCACTATGTGAAATCTTCGTTTTTTTTTT
>HWI-ST942:56:C4CFMACXX:7:1105:8517:386641
ACTATTGGTTCTAAGCCATCTCTGGCGCTGAATCAACAATTCGAAGTGCTTTTCTTGCGTATTCTTGATAAACCAGCGTTTATATATAAGATCGGGAA
>HWI-ST942:56:C4CFMACXX:7:1105:8615:850271
GTAAGTTCCGACCCGCACGAAAGGCGTAACGATCTGGGCACTGTCTCGGAGAGAGGCTCGGTGAAATAGACATGTCTGTGAAGATGCGGACTACCTGCAC
>HWI-ST942:56:C4CFMACXX:7:1105:8642:438001
ATTAATAAACCTGCTAACGAACCGAACCATAGAGGACTTAGTACCGGTGCTACGGAAAGATATGTTTTTAGATCTCGCATTAGAAATCCTCCTTCTTTCT
>HWI-ST942:56:C4CFMACXX:7:1105:8670:661131
ATTATATACATTATAGAAGGGATAACGATAAAAAGAGGAAGAAGACGAGCTACAAGAAAAATACCCGCCGCTACCATAGTAGCAGCATGTATAAGAGCC
>HWI-ST942:56:C4CFMACXX:7:1105:8757:315121
ATTTTGTAGCTGCTGCACAACTCCTTATTTATGTGGGGGCCATAAATGATTTAATCATATTTGCTGTGATGTTCATGAATGATTCAGATCGGAAGGAGCA
>HWI-ST942:56:C4CFMACXX:7:1105:8796:72241
GCTATATCAGAGTAATTATGCTGGAATTGAGTCGTATAGCTTCTCATCTGTTATGGCTCCGCCCCTTTTTGGCAGAAAATTGTGGCCAGACTCCCCTTTT
>HWI-ST942:56:C4CFMACXX:7:1105:9073:479021
AACGCCATGGTAAGGCGTAAGTCATCGGTTCAAATCCGATAAGGGGCTTTTACGTTCTTAATTTTTTATTGTCAAAATTTTAATTTGAAGGCTATAATTT
>HWI-ST942:56:C4CFMACXX:7:1105:9346:596641
GCCATGGAGGGCCCTACTCCCATTTCGGCTCTTATACATGCTGCTACTATGGTAGCGGCGGGGAGTTTTTTTTTTGGTCCTCCTCTTTCTCCTTTTTTTC
>HWI-ST942:56:C4CFMACXX:7:1105:9624:492921
AAAAAAGAAATATTTGTTCTTCGCTTATGAATATAAGAATATTAAGAACTTTTTTAGTAAAATCTCGTATACTAGATCGGAAGAGCCACGTCTGAACTCC
>HWI-ST942:56:C4CFMACXX:7:1105:9711:817931
AATAGGAGCATCCGTCGACAAAAGGATCACCCTAAGATGTTAATCTCATGGCTATTGAGAACTAATCAAATCAA
>HWI-ST942:56:C4CFMACXX:7:1105:9942:868781
TGGCTTGGCATAGCGGGCCCCCAGCAGGAGGCCCGCACGACGGGCTATTAGCTCAGTGGTAGAGCGCGCCCCTGATAATTGCGTCGTTGTGCCTGGGCTA
>HWI-ST942:56:C4CFMACXX:7:1105:9951:95421
ATCCTACATCTGAACTGAATTCTTTCTGGTTAAAGAATCTTTTTCTAGTTGCTCTGGAACAATTAGGAGATTGTCTAGAAGAAGATCGGAAGAAGCACAC
>HWI-ST942:56:C4CFMACXX:7:1106:10058:185371
AGTTGTGAGCATTACGTTCATGCATAACTTCCATACCAAGGTTAGCACGGTTAATAATATCAGCCCAAGTATTAATAACACGTCCTTGACTATCAACTAC
>HWI-ST942:56:C4CFMACXX:7:1106:10092:347241
ATATATATTATAGTAGTTACTTTTTGTAGTTTTCTTTTTTTTTTTTTCATTTTTATGAAATAATTAATAAATAAAAACAAAAAAAAATTCTTTTTT
>HWI-ST942:56:C4CFMACXX:7:1106:10283:702351
CCTTCTTTTTTATTGGTATATCAAATTCATTTCTTCTTTTTTTCTCATATCAGATAACAAAGATATAATTAAAAAATTTACTTTTTTTTTTTTTTTTTTC
>HWI-ST942:56:C4CFMACXX:7:1106:10400:50751
CTAACCCGTCAATTTGGGATCCAATTCGGGATTTTCCTTGAGGGATATTGGTAAGGAATTGGAATGTAATAATATCGATTCATAATGGATTCATATC
>HWI-ST942:56:C4CFMACXX:7:1106:10478:630981
CGTTCTATTACTAATTTCATTGGATCCTGAACCCTCGTTTTTATGACCTTTCCCCCCCCCCCCTCACAACACGCCTATTTCTGTCTCATTTCTATTAAAT
>HWI-ST942:56:C4CFMACXX:7:1106:10571:489621
TAATAATAATAAATTTCTTTTCATGAAAGTAAAAAAAAAAAAAAAAACCGCCCTTTCGACTTTTTCTAAAAATTTAACCCAA
>HWI-ST942:56:C4CFMACXX:7:1106:10624:547831
CTTTCGTTTCTCGACGGTGAAGTAAGACCAAACCCATGAGCTTATTATCCTAGGTCGGAACAAGTTGATAGGATCCCCTTTTACGCCCCCATGTCCCTCT
>HWI-ST942:56:C4CFMACXX:7:1106:10833:649091
ATTAAGATATTTCACTTGTATCTTTATACATTACAATAACCATAATGGCTAGTATGGGAGAAAGAGAACTCTTTCTACCATACTAGCGGACCCCTTCG
>HWI-ST942:56:C4CFMACXX:7:1106:10936:754621
AAGGGTCCGTTGAGCACCCTATGGATATGTCATAATAGATCCGAACACTTGCCCCGGATCGCCTTCAAATCCATAATTGCTCTAGTGAATAATTAAAAAA
>HWI-ST942:56:C4CFMACXX:7:1106:11086:127011
ACGATTAACTCGTACAATGGATTAGCAATCCAACGCTTTAGTCCACTCAGCCATCTCTCCTAATCGAAAAGGGATATTTAATTAGGTTCCATAAAAAAAA
>HWI-ST942:56:C4CFMACXX:7:1106:11494:454991
GTTATTATACCTATCAAAGATATTATATACATTATAGAAGGGATAACGATAAAAAGAGGAAGAAGACGAGCTACAAGAAAAATACCCGCCGCTACCATA
>HWI-ST942:56:C4CFMACXX:7:1106:11609:851071
ATACCATATATATGTTCTTTTTTTTTTCATCTTTGGCTTAAATTTTCAGAAATAGTCGAACGGTCGGTTCTTTTTTTTTTTTTTTATTTTCTTAAAAAAA
>HWI-ST942:56:C4CFMACXX:7:1106:11891:851441
GTTTCTAATTCTAATAATTCATGAAGCAAATTTTCATATGGTCCCAAGTTAATTGAATGAAAAATTTATAAATTTCAGATCGGAAGAGCACCGTCT
>HWI-ST942:56:C4CFMACXX:7:1106:12008:731221
TATCATAAGATCTTTTCCTGTAACTGGTCTCTTCATAAGTTTTTCCTTGATTCGTTCTGGCATGAATTAGATTTCTGAAGATCGGAAAGAGCACACGTCT
>HWI-ST942:56:C4CFMACXX:7:1106:12315:85241
AATGGTGGATGCCCGGGACCAAGTTATTATGATTTCTTTTTCCGCCTTTGTATTAAGCTTCTCTATTAGATCGGGAAGAGCACACGTCTGAACTCCAGTC
>HWI-ST942:56:C4CFMACXX:7:1106:12486:643031
AAAATAGTTAATCGTGGGGTTACCATTCTCTCTTTTTTTTTCGTTATCTCGCATGTGGTCCTAAGAAAAGGGAATTTGTCGATTTTTCGGGGTCTTAAA
>HWI-ST942:56:C4CFMACXX:7:1106:12807:180781
GTACTCAGCAAGTTGACATACACCCAAGATATTTTATCTTGACATGTGATGAAGAGATACGGATTATCCTCTGAACAATAATTTTCTAAAAAAAAAAAAA
>HWI-ST942:56:C4CFMACXX:7:1106:12888:444741
TTTCTTTTTTGCGTGTATTAAATACTTGTCTATTAAATACTATAGTATCAACTATTGTTATTTTCCTTTTATACCCTTTTTTTAGTTGACAGATTCGGAA
>HWI-ST942:56:C4CFMACXX:7:1106:13031:744991
CTATGGTTCGGTTCGTTAGCAGGTTTATTAATAGAGATTAATCGTTTATTTCCAGATGCATTAACATTTCCCTTTTTTTCATTCTAGTTATTAACATCA
>HWI-ST942:56:C4CFMACXX:7:1106:13116:843621
AATGCGTTCCTTTCATTTAAGACGAGAAATTGAAATCTTTTTTTTTTTTTTTATATAAAAATTTTATTAAAATTAATTATTTTGACAAACGGTTTTTACT
>HWI-ST942:56:C4CFMACXX:7:1106:1332:607991
CAATTTTTTTTTTCCAAATGAAATTTTTAATAATTTTTTTTTTTAGCCCCCATATATCAAACGAAAAAAAAAAAAGTTTATTTTTTTTTTCAAAAAAAA
>HWI-ST942:56:C4CFMACXX:7:1106:13511:198701
TCAAGCAAAAGTACATTCCCCCCTTTTTTTTGATAGAATAGATAAACTTTTTTTTTTTTTGTTTGATCTATGGGGGCTAAAAAAAAAAATTATTCAAAAT
>HWI-ST942:56:C4CFMACXX:7:1106:1373:756091
AGGCACAACGACGCAATTATCAGGGGCGCGCTCTACCACTGAGCTAATAGCCCGTCGTGCCGGCCCCCCGGCCTGGGGCCGCCAGGGCGCAGCAAAAGGC
>HWI-ST942:56:C4CFMACXX:7:1106:13816:690041
GAAAAAAAAAAAAAGAAAACTACAAAAAGAAACTACTATAATATATATATATATATAAACAAAAAAAAGAAGTTTTTAACAAATTAAAACAAGAAAAACA
>HWI-ST942:56:C4CFMACXX:7:1106:1384:342031
TTGGTATATCAAATTCATTTCTTCTTTTTTTCTCATATCAGATAACAAAGATATAATTAAAAAATTTACTTTTTTTTTTTTTTTTTTTTCTTCCAATTTT
>HWI-ST942:56:C4CFMACXX:7:1106:13899:426131
GAAATGAAAATAATGGAAAAAGTTGGATTCAATTGTCAACTACTCCTATCGGAAATAGGATTGACTACGGATTCGAGCCATAGCACATGGTTTCATAAAA
>HWI-ST942:56:C4CFMACXX:7:1106:13974:547721
CTTCATGTATGGTTACCTGATGCCATGGAGGGCCCTACTCCCATTTCGGCTCTTATACATGCTGCTACTATGGTAGCGGCGGGGATTTTTTCTTTTTCTC
>HWI-ST942:56:C4CFMACXX:7:1106:14402:749951
AGTTGTACAAACCAACGAAGTAATCCCATTCCCAATGGTCCACAGATTGAAGATCGGGAAGAGCACACGTCTGAACTCCAGCCACATGTCAGAATCTCGT
>HWI-ST942:56:C4CFMACXX:7:1106:14543:439411
CAATGTCGGCTCTTCGCCACCTGGGGCTGTAGTATGTTCCAAGGGTTGGGCTGTTCGCCCATTAAAGCGGGACGTGAGCTGGGTTCAGAACGTCGTGA
>HWI-ST942:56:C4CFMACXX:7:1106:14558:421971
TTTTTGAAAAATCCATTACAAAATATCAAAACAAAACTGTAAATAAAAAAAAAAAAATTATTATTTTTTTTGCCCCTAAAAAAATTTTTTCCCCAAAC
>HWI-ST942:56:C4CFMACXX:7:1106:14615:162631
TAAGAGTACTGTTATTATACCTATCAAAGATATTATATACATTATAGAAGGGATAACGATAAAAAGAGGAAGAAGACGAGCTACAAGAAAAATACCCGCC
>HWI-ST942:56:C4CFMACXX:7:1106:14650:702711
TATATGTTCTTTTTTTTTTCATCTTTGGCTTAAATTTTCAGAAATAGTCGAACGGTCGATTCTTTTTTTTTTTTACTTTCATGAAAAGAAATTTATTATT
>HWI-ST942:56:C4CFMACXX:7:1106:14697:532021
GCTACATCCCTTTCAATAGGTTTACAGTGTCATTGTAGAGAATTCCTGTCTTGTTTTCCACATCCTCCTTCTTTTTTATTGGTATATCAAATTCATTTCT
>HWI-ST942:56:C4CFMACXX:7:1106:14825:719261
TATATATTCGAACCACAGTTGGTCATATTTCTTTTTATCGAGAAATCGAGGAAGCTATACAGATCGGAAGAGCACACGTCCTGAACTCCAGTCACATGTC
>HWI-ST942:56:C4CFMACXX:7:1106:15130:454211
CATAATTATTTTTTTTTTTTTTTACAGTTTTGTTTTGATATTTTGTAATGGATTTTTCAAAAAATTTTTTATTAATATAGCTTTTTTTTTGTATCTTTTA
>HWI-ST942:56:C4CFMACXX:7:1106:15169:770361
TGCTTTATATATCATTGTTTTGATTCGTCGATGATTCAGCAATCCCAAAGTGTCTTTTTTTTTTTTTCGGGGTGAAAAACAAAGTTTGGACGCTGAAAAT
>HWI-ST942:56:C4CFMACXX:7:1106:1568:66621
ATTGGATGGGTTACTTTTTATTGGCATTGGAAACACATCACATTATGGCAGGGTAAAGGTTTACAATTTAATTAATCTTTCACTTATTTTATGGGGTGGT
>HWI-ST942:56:C4CFMACXX:7:1106:16014:849801
TTGTAGATGGAGCCTCAACAGCAGCTAGGTCTAGAGGGAAGTTGTGAGCATTACGTTCATGCATAACTTCCATACCAAGGTTAGCACGGTTAATAA
>HWI-ST942:56:C4CFMACXX:7:1106:16059:247761
TGGAAGGATGAAAGAAAGAGAGAAAAAATTGAATATTAATGATATATTATTCCAATTTGGAAAGTCTATGAGGTCACTGTAAGAAAAGCAATGTAATAAA
>HWI-ST942:56:C4CFMACXX:7:1106:16135:420641
TTTCTCATTGAGCGAAGGGGTACGAAATAAATTCAATCAGATTTATTTTTGATCAAAAAAAAAAAAAAAAATACCAATGTGAAATCTTCGTTTTTTTTTT
>HWI-ST942:56:C4CFMACXX:7:1106:1615:434131
TGATTCATTTCAATATGAAAAATAATTCACCGGATTCCATCAACTAGAATATAACAAAAAAGTACGAATAAAAAAAATATTTAGGTAAAAAAAATTTTCA
>HWI-ST942:56:C4CFMACXX:7:1106:16201:760441
AGCAACACTTTTTTTCGTTCTATTACTAATTTCATTGGATCCTGAACCCTCGTTTTTATGACCTTTCCCCCCCCCCCCTCCACTCCCGTCTCGTGCCAC
>HWI-ST942:56:C4CFMACXX:7:1106:16579:450421
CATGCCAAAAATGATAATAGATCTCGTCGTTAATTAAATAAATTAAAAAAATTGATTAAAGTTTTTTTTTGAGGGGGAGGAAAACCTTATGTTAAAGAGT
>HWI-ST942:56:C4CFMACXX:7:1106:16676:614661
TCCCCTTTTTTATTCTATCTTTGAAAGATTAAAAAATACTATATGTTCATAATATACTAATTTAGTTAAGTTCATTTTTCAAAAACACGATAAAAAATT
>HWI-ST942:56:C4CFMACXX:7:1106:17046:864371
ATAGAATCTGACCCATTTTCTCATTGAGCGAAGGGGTACGAAATAAATTCAATCAGATTTATTTTTGATCAAAAAAAAAAAAAAATCACTATGTGA
>HWI-ST942:56:C4CFMACXX:7:1106:17212:607961
CCCTAGCAACACTTTTTTTCGTTCTATTACTAATTTCATTGGATCCTGAACCCTCGTTTTTATGACCTTTCCCCCCCCCCCCCCCCCCCCCCTCCCTCTT
>HWI-ST942:56:C4CFMACXX:7:1106:17292:300191
CTTTTCCATTTCCATTCAAGAGTTCTTATGTGTTTCCACGCCCCTTTAAA
>HWI-ST942:56:C4CFMACXX:7:1106:17378:434701
TGTGACACAGGGATTTTAAGTCCCCCGCAATTAAGCTATGCCGACCATTACTGAGGTATCATCTACTGAAGTATCATCTTGCTTTTACTAATGGTGACAT
>HWI-ST942:56:C4CFMACXX:7:1106:17560:642331
CTATAGTCCCTAAAACTTGTTGTTTCGCCGATTTATGGTTCCCCTTTTTTTCGGCGCGTGTGTTCCTTATCTTATTTTAGTATCTAGTAGAGCTAGGACA
>HWI-ST942:56:C4CFMACXX:7:1106:17576:833831
CCTCTTCATGTATGGTTACCTGATGCCATGGAGGGCCCTACTCCCATTTCGGCTCTTATACATGCTGCTACTATGGTAGCGGCGGGAAATTTTTTTTTTT
>HWI-ST942:56:C4CFMACXX:7:1106:17740:388911
AGAGAAAGAGAAAAAAAAAAACGAAGATTTCACATAGTGATTTTTTTTTTTTTTTTTTTTAAAAAAAAAATTTATTTAATTTTTTTTTTACCCCTTTGCC
>HWI-ST942:56:C4CFMACXX:7:1106:18198:809401
AACGGAATTTTTTGTTGTTCGATCAAGTATGGGAAACTTAATGGAATTCATAGATCGGAAGACACACGTCTGAACTCCAGTCACATGTCAGAATCTCGTA
>HWI-ST942:56:C4CFMACXX:7:1106:1852:74811
GTTTGGGCTACAGGATTTATGTTCTTAATTTCCTGGCGTGGTTATTGGCAGGAATTGATTGAAACTTAATCTTTTTTGCTATAAATCTATTTATTCTACA
>HWI-ST942:56:C4CFMACXX:7:1106:18569:1006801
TTTCATAATCGATTAGTTAACCTAAGAAAAAAAAAAAAAAAAAAAAAACTAGCCTTTCAATATATTTTTTTTTACCAATTAGAATTTCCCCCCAGAAATT
>HWI-ST942:56:C4CFMACXX:7:1106:18917:89541
AAGGTTCTCTATCGATTCAACAAGTGCTGTACTTATGGGAAAGCGATAGAGAAAGAGAAAAAAAAAAACGAAGATTTAACATAGAGCTTTTTTTTTTTTT
>HWI-ST942:56:C4CFMACXX:7:1106:1936:790911
AGATGGGGTTTCTCTCGCTTTTGGCTTGGCATAGCGGGCCCCCAGCAGGAGGCCCGCACGACGGGCTATTAGCTCAGTGGTAGAGCGCGCCCCTGATAAT
>HWI-ST942:56:C4CFMACXX:7:1106:19375:912291
ATCTTCTAGAAGGATCATCTAGAAAGCAAAATTTTCTGTGAAAGTACCCAGACGGAAAAAAGCTCACATAGATGTTATGGGTCGAATTTTTATTTC
>HWI-ST942:56:C4CFMACXX:7:1106:19449:517751
AATTAAAGAGTAAAATTGACTAAAGAATCAAAAATTAAGAATAATCCGTTTCGTTTTTTATACTTTCTCCTGAAGTAGGAAAGATCGGAAGGAGCACAC
>HWI-ST942:56:C4CFMACXX:7:1106:19456:868631
CCCCATGGAGGTGGTGAAGGGAGGGCTCCAATTGGTAGAAAAAAACCCGTAACCCCCTGGGGTTATCCTGCACTTGGAAGAAGAACTAGAAAAAGGAAAA
>HWI-ST942:56:C4CFMACXX:7:1106:19472:387081
GTATAGCTTCTCATCTGTTATGGCTCCGCCCCTTTTTGGCAGAAATTTGTGCCCAGACTCCCCTTTTTTTTT
>HWI-ST942:56:C4CFMACXX:7:1106:19593:291011
TCCCTAGCAACACTTTTTTTCGTTCTATTACTAATTTCATTGGATCCTGAACCCTCGTTTTTATGACCTTTCCCCCCCCCCCCCCCCCCCCCCCCCCCCT
>HWI-ST942:56:C4CFMACXX:7:1106:19706:906981
TTCGATATTCCTTTTTATTTCTCATCAAATGAATGGCATCTTCTTCTGGAAATCCTAGCTATTCTTAGCATGATATTCGGGAATCTCATTGCTATTACTC
>HWI-ST942:56:C4CFMACXX:7:1106:20135:153591
GGTACGAAATAAATTCAATCAGATTTATTTTTGATCAAAAAAAAAAAAAAAAATCACTATGTGAATTCTTCTTTTTTTTTTTTTTTTTTCTTTATCGTTT
>HWI-ST942:56:C4CFMACXX:7:1106:2040:388601
TTATTCGATCACAGCGAGGGAGCAAGTCAAAATAGAAAAACTCACATTCATTGGGTTTAGGGATAATCAGGCTCGAACTGATGACTTCCACCACGTCAA
>HWI-ST942:56:C4CFMACXX:7:1106:20415:796181
CCATTATAAGTACATTTAACATGCATTTCACGTTTCCAATCCTTTAAATCCTGGGACCACTCGGGAAATTGAAATAATAACATACGGACACTGTTTTTAA
>HWI-ST942:56:C4CFMACXX:7:1106:20447:571321
GTAGGTCCCGACACAAGGTTAGAATTCTAGCTCTTCCAGAGTGGTATCTCACTGATGGCTCCGGCCCCCCCCGCCGGGGGGCTTCTTCCCCCTCCCCCTC
>HWI-ST942:56:C4CFMACXX:7:1106:20524:673461
AATATATTGAAAGGCTAGTTCTTTTGTTTTTTTTTTTTTTTCTTAGGTTTCCAAATCGCTTTTTAAAAGGAAAAAAGGGGG
>HWI-ST942:56:C4CFMACXX:7:1106:20532:159881
ATTAAGGCACATTCTTTTAATATAATATATTCGTAATTACTTTCTTGAAATTGATAGGTTGAAAATACACTTTAGATCGGAAGAGACACGTCTGAACTCC
>HWI-ST942:56:C4CFMACXX:7:1106:21234:956801
CTCTCCAAAAAAGCATGTTTTTTTTTACCACCGCACGAAGAAAATGTTTTGTTGTGAATGAACAAGATAGTGAGGAATTGTCCATACGTAAACGTAAAAT
>HWI-ST942:56:C4CFMACXX:7:1106:2125:1007221
TAGTAAAAGGGGCTTTAGATGCACGTGGTTCCAAGTTAATGCCAGATAAAAAGGNNTTCGNGAATAGTTTTCCTTGCGATGGTCCGNNACGAGGAGGTC
>HWI-ST942:56:C4CFMACXX:7:1106:2258:912621
TTCTCATTGAGCGAAGGGGTACGAAATAAATTCAATCAGATTTATTTTTGATCAAAAAAAAAAAAAAAAACCACTTTGTGAATTTTTCTTTTTTTTTTTT
>HWI-ST942:56:C4CFMACXX:7:1106:2412:226801	Yes
ACCCCTCTTTTTTCCGATCCAGTTCCTCCACCACCGCGAACTCCAGTTAGATTCAGGCATGATACACTTTTGAGTTATTGGCTTTTCCGGCTATACGCAC
>HWI-ST942:56:C4CFMACXX:7:1106:2451:173641
TAAAGAAAAAAGTAAAGTCGAACTATACCCTATACCCTGAAATTTGACCTTTTTTTCTTACCCCTTCTCTGTCATTTATGCAAAAAAAAAAAAATGGTTA
>HWI-ST942:56:C4CFMACXX:7:1106:2553:166181
CCATCATTCTTAAGTCCCATAAGTTTGATCCTATAGAATCTGACCCATTTTCTCATTGAGCGAAGGGGTACGAAATAAATTCAATCAGATTTATTTTT
>HWI-ST942:56:C4CFMACXX:7:1106:2737:551421
ACGTAAAAACCGTTAGTCAAAATGATTAATTTGAATAAAATTTTACTATCAAAAAAAAAAAAAAGATTAAAATTTCTCGTTTAAAAAAAAAAAAACACAT
>HWI-ST942:56:C4CFMACXX:7:1106:2938:866761
CTTTTTTTGATAAACGAATCATTGATGGAATTACAAATGGAGTAGGTATTACAAGTTTCTTTGTAGGAGAAGTAACAAAATATATAGGTGGAAGTCGCAT
>HWI-ST942:56:C4CFMACXX:7:1106:3374:340471
CATAATGGATTCATATCGATACAGAAGAAAAGGTTCTCTATCGATTCAACAAGTGCTGTACTTATGGGAAAGCGATAGAGAAAGAGAAAAAAAAAAAC
>HWI-ST942:56:C4CFMACXX:7:1106:3730:588031
ACTCCTAGAGGGGGATAGGGCTAAGCGGAGCGAAAAGGGTTTTCCATGAGACA
>HWI-ST942:56:C4CFMACXX:7:1106:3764:901041
ACTACTACTGAGTCTAATGCGTTCCTTTCATTTAAGACGAGAAATTGAAATCTTTTTTTTTTTTTTTATTTTTAAATTTTTTTTAAATTATAAATTTTT
>HWI-ST942:56:C4CFMACXX:7:1106:4019:972741
TACTTTCCTCGCGTATGTATAAGATCGAATCCTTTCTATTTCTAAAACGGATTACTAATCCTTAACTTTTCAAGAATTCCTTCTTAAGTGTTTGGAAAT
>HWI-ST942:56:C4CFMACXX:7:1106:4210:38211
GATACAATCAACAATCGGGGACTAACCCCCCCACCTTTTCTAATTAGTAGAATAAATTAGAAAAGGTGGGGGGGGGGGGAAAGGTCAAAAAAAAAAAGGT
>HWI-ST942:56:C4CFMACXX:7:1106:4405:271551
GGGTTTCTCTCGCTTTTGGCTTGGCATAGCGGGCCCCCAGCAGGAGGCCCGCACGACGGGCTATTAGCTCAGTGGTAGAGCGCGCCCCTGATAATTGCGT
>HWI-ST942:56:C4CFMACXX:7:1106:4541:267521
ACTACTTCTATTATATGCAAAATTATGATAAAAACTCTATAAAAAAAATTGAAACAGGGCGATCTAAAACTGTTGCTCAAATCAAATACAAATAATATAT
>HWI-ST942:56:C4CFMACXX:7:1106:4567:556841
TAGAAGCTAAAAAGGGTATCCTGAGCAATCGCAATAATCGGGTTCATTGATATTCCGGGAATAGTAAAGGCAACCACCAAACCAACAATATCAATTTCGT
>HWI-ST942:56:C4CFMACXX:7:1106:4735:780171
ATCATTTCTATTTCCTAAATTTTATCCTCTTTTCCCTAAATGAAAGAACCTAATTAGATTCAAGTTCACCAAAAAAATATCTAGATGTTGGTATGCAAAT
>HWI-ST942:56:C4CFMACXX:7:1106:4914:556031
TATGAATCAGGTATAGAACCGATCGGGGATGCTTGGTTACAATTTAGAATCCGTTATTATATGTTTGCTCTAGTTTTTGTTGTTTTTGATGTTGAAACT
>HWI-ST942:56:C4CFMACXX:7:1106:5264:325101
CGATAGAGAAAGAGAAAAAAAAAAAACGAAGATTTCACATAGTGATTTTTTTTTTTTTTTTTTTAAAAAAAAAATTTGTTTGAATTTTTTTTTTCCCCCT
>HWI-ST942:56:C4CFMACXX:7:1106:5301:495861
TACGAAAAAAATTATGCATCATTCTCATACCGGTGGCAGCTTCGAATAGATCATATACAAATTCTCGTTCTCTGCAAATATAGAACAAGGGAGTCTGTGC
>HWI-ST942:56:C4CFMACXX:7:1106:6107:994811
TTTCATATAATCTCCTCTTCTAGCTAAACTATAAAAAAGGCACTCTGTCCTTTTTTTTTTTTTTTTTTTTTTTGAATATAAAAAAAATTTTGAATTAAAT
>HWI-ST942:56:C4CFMACXX:7:1106:6124:684141
AAAGTGGCTCCTAAGAGTACTGTTATTATACCTATCAAAGATATTATATACATTATAGAAGGGATAACGATAAAAAGAGGAAGACGACGAGCTACAAGAA
>HWI-ST942:56:C4CFMACXX:7:1106:6171:823871
TTTCATGAAAGTAAAAAAAAAAAAAAAAATCGACCGTTCGACTATTTTTGAAAATTTAAGCCAAAGATGAAAAAAAAAAAAAAAAAAAAATGTTTTTAAA
>HWI-ST942:56:C4CFMACXX:7:1106:6526:191081
TACTTTTGAAGGACATTTAAACACTTATTTTCTAAATTACAGTGGAAAAAAAAATGGCTCCTTCTTTTTCATCTCTTTATTGGGTAAAGAAAGAGAAAAA
>HWI-ST942:56:C4CFMACXX:7:1106:6597:216311
TCAATCAATCTTTTTGAGCGAAACAGAGGATATCTCGATCGAGGGAGAAAATGGGGAAATCCCATATAGCCCGATATATCTGACAAGTCGCACTATATGT
>HWI-ST942:56:C4CFMACXX:7:1106:6895:980011
CTTATATTTGTCCTATGTATTGATTTTTTTAATGATCCTCTTTTTTTTTTATTTTGAAAAATTCTAAATTCGAATTTTCTTTATTTCCATATAGATTTTC
>HWI-ST942:56:C4CFMACXX:7:1106:7206:786301
GGTTACCTGATGCCATGGAGGGCCCTACTCCCATTTCGGCTCTTATACATGCTGCTACTATGGTAGCGGCGGGGGTTTTTTTTTTTGATCCGCTTTTTTC
>HWI-ST942:56:C4CFMACXX:7:1106:7336:940311
ATACACCCAAGATATTTTATCTTGACATGTGATGAAGAGATACGGATTATCCTCTGAACAATAATTTTCTAAAAAAAAAAAAACAAAATTTTTGTAACTT
>HWI-ST942:56:C4CFMACXX:7:1106:7523:94351
AAATGTGTAAAAGATGCTAGTCGCACTTAAAAGCCGAGTACTCTACCGTTGAGTTAGCAACCCCCCCCAAAAAAAAAAAAAACGAAGTGAAAATATGAAA
>HWI-ST942:56:C4CFMACXX:7:1106:7562:149731
TTCACTGTTCCCTGGGATTGGCTTTGGGCTTTTCCTGCGCAGCTTAGGTGGAAGGCGAAGAAGGCCCCCTTCCGGGGGGGCCCGAGCCATCAGTGA
>HWI-ST942:56:C4CFMACXX:7:1106:7564:222581
TATCGAATGAAAGAAATATCATGAATAACAATATCGGAGCTATAAAATCGATTCATCGTCAAGAATTTAATAGTATAACATAGGAGATCGGGAAGAGCAC
>HWI-ST942:56:C4CFMACXX:7:1106:7681:318751
TCTGTCATTTCGCTAAGTCGTACTAAATAACGAGCTAATGAATCTCCTTGTTTTTGCCATTGAATTTCCCATTCAAATTCATCGTAAGACTCATAAC
>HWI-ST942:56:C4CFMACXX:7:1106:7749:1002311
GGTTACTCCCCCTCCAAGAACTGTATATGAGAATTTCATCTCGTACAGCTCAAACAAAAAAAGACCCAAATACTGATTGAAACAGATATGGAATATAAAA
>HWI-ST942:56:C4CFMACXX:7:1106:7849:889611
CAACTTGTTCCGACCTAGGATAATAAGCTCATGGGTTTGGTCTTACTTCACCGTCGAGAAACGAAAGAAGGCTTCCACCTCCAAGTTTAACTCAGACGTA
>HWI-ST942:56:C4CFMACXX:7:1106:7973:589051
TTTTCGTTCTATTACTAATTTCATTGGATCCTGAACCCTCGTTTTTATGACCTTTCCCCCCCCCCCCCCCCCCACCCTACTCCTTTTCTTTTTTTCTTTT
>HWI-ST942:56:C4CFMACXX:7:1106:8431:286801
TATTAACATCAGAAAGGGGTGAAAAATTTAGAGATACAATCAACAATCGGGGACTAACCCCCCCACCTTTTCTAATTAGTAGAATAAATTAGAAAAGGT
>HWI-ST942:56:C4CFMACXX:7:1106:8640:628661
ATACTAAAAATATTCTTTTAAACGAAGGTATTCGTGCTTGGATGGCGGCTCAAGATCAGCCTCATGAAAACCTTATATTCTCTGAGGAGGTTCTACCAC
>HWI-ST942:56:C4CFMACXX:7:1106:8731:460961
TGGATTGATCATATTATTGTAGCAACTGAAAAAAAAAGAATAAAGAACTATATTATTAAGTATTAAAAGGAAATCAAAAAGAATCCGAATCCAGGGGAG
>HWI-ST942:56:C4CFMACXX:7:1106:8876:393281
TTTAGTAAAAAAAAGATTGAGCCGAGTGCAATTAAACTAATAAAACAAACGTGAATTACTAAATCTAATTCATCTAGATCGGAAGAGCAACACGTCTGAA
>HWI-ST942:56:C4CFMACXX:7:1106:9284:631261
AATAATAATAAATTTCTTTTCATGAAAGTAAAAAAAAAAAAAAAAACCACCGTTCGACAATTTTTGAAAATTTAAGCCAAAAATGAAAAAAAAAAAAAAA
>HWI-ST942:56:C4CFMACXX:7:1106:9287:854651
GTTATCTTCTTTTATTTTTTTGAGCTCCATCCATATTGATTTAGTCTAATCAACAAAGATTCTATCATTTTTGTATTTGCAATTCAATATGGTTATATAT
>HWI-ST942:56:C4CFMACXX:7:1106:9304:825561
TCCTTGAGGGATATTGGTAAGGAATTGGAATGTAATAATATCGATTCATAATGGATTCATATCGATACAGAAGAAAAGGTTCTCTATCGATTCAACAAGT
>HWI-ST942:56:C4CFMACXX:7:1106:9921:429481
AATGAAACCTTCAAAGTCCAAAGTTCACTGAGTGAGAACCATTGGATCATCACTTATTCAATAAGATCGGAAGAGCAACGTCTGAACTCCAGTCACATGT
>HWI-ST942:56:C4CFMACXX:7:1107:10187:796961
TGATATTGTATATACGTACAAAATCGAGTCGGGTTAAAGAATGCCCTCTTTCTAGCCTTTTCGTTTTTTAGAAAAAAAAAAAAAAAAAAACCTCTTTATT
>HWI-ST942:56:C4CFMACXX:7:1107:10327:31081
AAAATGAATCTAATATATTCATTATTTGTTTTAAACAAGAGACAGAAACAAGGATAAATTTATTAAGAGAAATTTCAAATATCCTTCCTATGATACCGG
>HWI-ST942:56:C4CFMACXX:7:1107:10487:589421
ATGAAAATAATGGAAAAAGTTGGATTCAATTGTCAACTACTCCTATCGGAAATAGGATTGACTACGGATTCGAGCCATAGCACATGGTTTCATAAAACC
>HWI-ST942:56:C4CFMACXX:7:1107:10539:224151
ATAATATATTCGTAATTACTTTCTTGAAATTGATAGGTTGAAAATACACTTTAGAAAAAAAAAAAAGAAAAAACACCCAAAACTAAAAATTTTATCTAAA
>HWI-ST942:56:C4CFMACXX:7:1107:10686:338131
GGGGTACGAAATAAATTCAATCAGATTTATTTTTGATCAAAAAAAAAAAAAAAAAATCACTATGGGAAATCTTCGTTTTTTTTTTTCTTTTTCTTATCCC
>HWI-ST942:56:C4CFMACXX:7:1107:10693:561931
AATTTTTTTTTTTAGCCCCCATATATCAAACGAAAAAAAAAAAAGTTTTTTTTTTTTATCAAAAAAAAGGGGGGAATTACTTTTTGTTTAAAAAAATCCC
>HWI-ST942:56:C4CFMACXX:7:1107:10997:415631
ATATATATAGAATTAAGGTTATGTTTTATTTATTTAATGATGAATGATAGTCACTATTTATGTGAGCTATATTCTGTTCTAAGATCGAAGAGCACACGTC
>HWI-ST942:56:C4CFMACXX:7:1107:11204:138981
ATACTACTACTGAGTCTAATGCGTTCCTTTCATTTAAGACGAGAAATTGAAATCTTTTTTTTTTTTTTGATAGTAAAATTTTATTCAAATTA
>HWI-ST942:56:C4CFMACXX:7:1107:11242:668211
GTGGGCAGCATCATTGTGGTAAAGGTCGTAATGCCAGAGGAATAATTACCGCAAGGCATAGAGGGGGAGGTCATAAGCGTCTATAGATCGGAAGGAGCAC
>HWI-ST942:56:C4CFMACXX:7:1107:11316:394741
TATATACATTATAGAAGGGATAACGATAAAAAGAGGAAGAAGACGAGCTACAAGAAAAATACCCGCCGCTACCATAGTAGCAGCATGTATAA
>HWI-ST942:56:C4CFMACXX:7:1107:11361:507781
ATAAATTCAATCAGATTTATTTTTGATCAAAAAAAAAAAAAAAATCACTATGGGAAATCTTCGTTTTTTTTTTTTTTTTCTTTATCGTTTTCCCATAA
>HWI-ST942:56:C4CFMACXX:7:1107:11369:986871
TCTCTCTCTTTTCTTTATTTGATTTCTTTTTTGATTTTATTCCCTTCCATCATTCTTAAGTCCCATAAGTTTGATCCTATAGAATCTGACCCATTTTCTC
>HWI-ST942:56:C4CFMACXX:7:1107:11773:296751
AGGTCCTGACACAAGGTTAGAATTCTAGCTCTTCCAGAGTGGTATCTCACTGATGGCTCCGGCCCCCCCCGAGCGGGGGCCTTCTCGCCTCCCTCCTAAC
>HWI-ST942:56:C4CFMACXX:7:1107:11875:734591
TCCCCTCTTTTGCAATCAGTTTCGCTACAGCACCCGCTGCTCTAGCTAATTGTCCACCCCTTCCAAGTGTGATTTCTATATTATGTATGGCCGTGCCTAA
>HWI-ST942:56:C4CFMACXX:7:1107:11893:421941
GTAATTATGCTGGAATTGAGTCGTATAGCTTCTCATCTGTTATGGCTCCGCCCCTTTTTTGCAGATAATTGTGCACAGACACCCTTTTTTTTTATTTTTA
>HWI-ST942:56:C4CFMACXX:7:1107:12005:194751
GAGGAAACTTTGCACAGAGTTCCATTACTATTAATGGGTGGCTCCGCGATTTCTTATGGCCACAACCACTTCGGGTATTTAGTCTTTTGGGTTTTTCGTT
>HWI-ST942:56:C4CFMACXX:7:1107:12553:273261
GGCTAAGCGGAGCGAAAAGGGTTTTCCATGAGACGGGAAATGAAAACTATTAGCCCCACCCAAAGTTTGTAATTAAGGGATTGTCTGTTATTGACAAG
>HWI-ST942:56:C4CFMACXX:7:1107:1259:909681
CAATAATAAAAAAAAAAAAAAGAAAAAAAAACCATTGAAACAATTATGAATTCCATTAAGTTTCCCATACTTGATCGAACAACAAAAAATTCCGTTATTT
>HWI-ST942:56:C4CFMACXX:7:1107:12690:363651
AATGTTCGAGTACCAGGCGCTACGGCGCTGAAGTAACCCATGCTATACTCCCAGGAAAAGCTCGAACGACCTTCAACAAAAGGGTACCTGTACCCGAAAC
>HWI-ST942:56:C4CFMACXX:7:1107:12755:405791
AATGGATTCATATCGATACAGAAGAAAAGGTTCTCTATCGATTCAACAAGTGCTGTACTTATGGGAAAGCGATAGAGAAAGAGAAAAAAAAAAACGAA
>HWI-ST942:56:C4CFMACXX:7:1107:12878:841241
TATGATAGTCAATATGGGACCTCACCACCCATCCATGCATGGTGTTCTTCGCTTAATTGTTACTCTAGATCGGAAGAGCACACGGTCTGAACTCCAGTCA
>HWI-ST942:56:C4CFMACXX:7:1107:12981:934631
ATACTACTACTGAGTCTAATGCGTTCCTTTCATTTAAGACGAGAAATTGAAATCTTTTTTTTTTTTTTTATAGTAAAATTTTTTTCAAATTAATCATTTT
>HWI-ST942:56:C4CFMACXX:7:1107:13258:595801
AGTTTACATATATATATATATATTATAGTAGTTACTTTTTGTAGTTTTCTTTTTTTTTTTTCAATTTTGATGAAATACTAATAAAAAAAATTAAAAAAAA
>HWI-ST942:56:C4CFMACXX:7:1107:13413:510741
CTATAGCTATTTTTCTAGGTATCATTAATATTCCAAGAATTACTACACAACTTTTTTTTGAATCAACAAAAAAAATTCTTGATAAATATATTTACAAGAA
>HWI-ST942:56:C4CFMACXX:7:1107:13428:832511
GCGATAGAGAAAGAGAAAAAAAAAAACGAAGATTTCACATAGTGATTTTTTTTTTTTTTTTTTTTAAAAAAAAAATTTATTTGAATTTTTTTTTTACCCC
>HWI-ST942:56:C4CFMACXX:7:1107:13537:772581
ATTTCTTTAGGATCTACTCCAGCGTTTAGAAATTGGTTAATCGGTAAAGATACATGTACTTGATGTCCTGCCCAAGAAAGGGACCAGATCGGAAGGAGCA
>HWI-ST942:56:C4CFMACXX:7:1107:13580:486191
AAAGGTTCTCTATCGATTCAACAAGTGCTGTACTTATGGGAAAGCGATAGAGAAAGAGAAAAAAAAAAACGAAGATTTCACATAGTGATTTTTTTTTTTT
>HWI-ST942:56:C4CFMACXX:7:1107:13954:187711
TCTTCCGCTTGATTAACACCATATTCTATTCTCGTAAGATGATACACGCTGGCTAAAAGGCAACCTGGGGCCACACCAAAGGCCCATTGC
>HWI-ST942:56:C4CFMACXX:7:1107:14030:662951
GCTACATCCGCCCCTACGCTACTATCTATTCTTTTTTGTATTGTCTAAAAAAAAAAAAAATTCAAAATTTCAAAAAAAAAAAAAAAAAGGAGGCAAATCC
>HWI-ST942:56:C4CFMACXX:7:1107:14037:565421
GAATCGAAATAGAAGTTTTTTCTGATTTTATTTATTTAGTATTTCATCAAAATTGAAAAAAAAAAAAAAAAAAACAAAAAAAAAAAACACTAAAATATAT
>HWI-ST942:56:C4CFMACXX:7:1107:14080:949101
ATCGATTCATAATGGATTCATATCGATACAGAAGAAAAGGTTCTCTATCGATTCAACAAGTGCTGTACTTATGGGAAAGCGATAGAGAAAGAGAAAAAAA
>HWI-ST942:56:C4CFMACXX:7:1107:14270:708691
AGTTACTAAATATGAAATAGTTCCTAAATATGAAATAGTAATAAAAAAAAAAAAATAAAAAAAAAGAAAAAAAAATTGAAAACTGAAATCAAATCAAATA
>HWI-ST942:56:C4CFMACXX:7:1107:14281:329821
TAACTAGCTGACGTGTAAAAAAAAAGAATGAATAAAAAAAATAGGATGGAAAGCCAAAAAAAAAAATAAAAAAAAAAAACCTGGTTCAAAAACCTTATTA
>HWI-ST942:56:C4CFMACXX:7:1107:14396:1000921
GATTCAACAATTAGATTTTTGGAGTTTTCGTATTATTAGTCTTGGATTTATCTTTTTAACCGTCGGCATTCAGATCGGGAAGAGCACACGTCTGAACTCC
>HWI-ST942:56:C4CFMACXX:7:1107:14449:279241
AGAAATAAAATGACCACCATTTTGGGTATTCACTTAATTTTGTTAGGTGTAGGTGCCTTTCTTCTAGTATTCAAGGCTCTCTATTTTGGGGGCGTATAT
>HWI-ST942:56:C4CFMACXX:7:1107:14783:780941
ATACTATTAAATTCTTGACGATGAATCGATTTTATAGCTCCGATATTGTTATTCATGATATTTCTTTCATTCGATATCATCGCAATCTAATTCATCTGA
>HWI-ST942:56:C4CFMACXX:7:1107:15508:166401
ATTCGGGCACATTTCAGCGTCACAAACTTTGTTTTCACACCGTAAAAAAAAAAAAAAACCCTTTGGGATTGCTGATTCTCCGACGATTCAAAACATTAAA
>HWI-ST942:56:C4CFMACXX:7:1107:15711:694161
GTTTCTTTATCTGATTCAAGTTCTACTTGACCGGCCGATTCTTTTTCTTCTTTATTCAGATTATAAATCGAAGGGATTCTTTTTTATTTTAAGGGATTAA
>HWI-ST942:56:C4CFMACXX:7:1107:15919:396771
GATAGGTTCCCTAGCAACACTTTTTTTCGTTCTATTACTAATTTCATTGGATCCTGAACCCTCGTTTTTATGACCTTTCCCCCCCCCCCCCCCCCCCCAC
>HWI-ST942:56:C4CFMACXX:7:1107:16005:711661
ATATTACTATATATAATGTAATACAATAAAGAAGAAAGAAGGAGGATTTCTAATGCGAGATCTAAAAACATATCTTTCCGTAGCACCGGTACTAAGTACT
>HWI-ST942:56:C4CFMACXX:7:1107:16117:558231
TTATATGATCCCCTATAGTTATATACATACAAATAAATAGATTGACTGGAATTTCAGACATCGGCCCGACGATGATCCATTTTTCAAAAGAGCGCAAATT
>HWI-ST942:56:C4CFMACXX:7:1107:16153:271401
GGATGGCATAGCCTTAAAGTTAAGGGCGAGGTTCAAACGAGGAAAGGCTTACGGTGGATACCTAGGCACCCAGAGACGAGAGATCGGAAGGAGCACACGT
>HWI-ST942:56:C4CFMACXX:7:1107:16254:723231
CTATTAATGAGGCAAATTCAATGAAACAACAACTGGTACCATAAAGAAGCGGCCATAGGCTGGAAAGTCTTGACCAATTTGAAAGATCATTTAACGTAGT
>HWI-ST942:56:C4CFMACXX:7:1107:16514:174501
CTCGTTCACTAGCTACAATCAAAAAGTTCATAATACTTTCTTTTTTTTTTTTTAACCCCCCTTAACTTTGGTTTATTTTTTTTTCCACCGGCCTTTTTTA
>HWI-ST942:56:C4CFMACXX:7:1107:17004:638211
AATAAATTTCATTCTAATAATATAATAACTAATAATAAAGTTAGCGAGTAATTTAAAAAATAAAAATGAACATTTGTATATTATAATACAATTACAAT
>HWI-ST942:56:C4CFMACXX:7:1107:17077:687041
TAGAATTCGAAATTCTCTACGTCGTTTAGGGGATAGAATTTTTTCAGGGACAAAGAAATCATAATTATTTTTTTTTTTTTTTTACATTTTTTTTTG
>HWI-ST942:56:C4CFMACXX:7:1107:17146:586291
AAACTTTTTTTTTTTTCGTTTGATATATGGGGGCTAAAAAAAAAAATTATTAAAAATTTCATTTGGAAAAAAAAAATTTATAAAAAAAAAGAAAAACAAA
>HWI-ST942:56:C4CFMACXX:7:1107:17350:372211
CCATAGGAAGTATTTGTGAAATAACTTCGATGAGAAGAAAAAAGAGGGCGTTAAGAGACCCTACTGGCCTAACCCTAGACACTCTAAGATCCTTTTTCAA
>HWI-ST942:56:C4CFMACXX:7:1107:17606:503841
TATATTAATAAAAAATTTTTTGAAAAATCCATTACAAAATATCAAAACAAAACTGTAAATAAAAAAAAAATAACTATTGTTTCCTTTGTCCTTGAAAAAT
>HWI-ST942:56:C4CFMACXX:7:1107:17634:805951
GTAATAAATAAGAGAATACTAAAGATTCGAGCCATAGAATTTCTCAATTCTGACACAAGGAACTTATACTTATTAGATCTAATA
>HWI-ST942:56:C4CFMACXX:7:1107:18150:95511
TCATTGCATATGCATAATTGTAGAATAGATTTTTTTATGATAATGTGATCCCCCCTTTTACTTTTTGTTTCATTTTAAGGAATTAATTTGCAGAAACAA
>HWI-ST942:56:C4CFMACXX:7:1107:18253:696591
AATTTCATTGGATCCTGAACCCTCGTTTTTATGACCTTTCCCCCCCCCCCCCCCCCCCCCCCCCTTCCTCCTCTTTTTTTTTTTTTCTTTTACTGTTTTA
>HWI-ST942:56:C4CFMACXX:7:1107:18279:546141
ACAGAATCCTTCTTTTTGAGATCTAAATTTAGATTTTTTTCTAAAATGAAGAATTAAGAGGTTGATAATTAAATTAAGATCCTTGTACAAAAAAACTACC
>HWI-ST942:56:C4CFMACXX:7:1107:18348:164111
TCCCTTTTTTTCATTCTAGTTATTAACATCAGAAAGGGGTGAAAAATTTAGAGATACAATCAACAATCGGGGACTAACCCCCCCACCTTTTCTAATTAGT
>HWI-ST942:56:C4CFMACXX:7:1107:1882:270631
TCTGTCCTAGTTGATCCTGATTCGACATTAAAAGTATATTGATTTTTTCCCCATTACCCGAAACCTTTTGTCTTTAAATCCTCATAATTTATTTCATTCA
>HWI-ST942:56:C4CFMACXX:7:1107:18884:120021
TACTTTTTATTGGCATTGGAAACACATCACATTATGGCAGGGGAACGTTTCACAGTTTAATGAATCTTCCACTTATTTAGATCGGAAGAGCAACACGTCT
>HWI-ST942:56:C4CFMACXX:7:1107:18898:938561
GGTGTTAATTTACCTACTAAAATATCACCTGTTTCAACCCACGATCCTAGCATCACAATTCCATTTTTGTCTAAATTTCGGAGTAAACGACCTTCTA
>HWI-ST942:56:C4CFMACXX:7:1107:19188:40341
TGTACTTATGGGAAAGCGATAGAGAAAGAGAAAAAAAAAAACGAAGATTTCACATAGTGATTTTTTTTTTTTTTTACAAAAAAAAAATTTTCTTAATTTT
>HWI-ST942:56:C4CFMACXX:7:1107:1924:596171
GTTAGGGATAGGAATAAGAATAGTTATTCTATATTTTTTGATAAAAAAAAAAAATTTTTTGATATTAACAATGATTTTAGGACCCAAGAAAACTTTTTTT
>HWI-ST942:56:C4CFMACXX:7:1107:19362:975151
TGTAGTTATTAGATCTAATAAGTATAAGTTCCTTGTGTCAGAATTGAGAAATTCTATGGCTCCAATCTTTTGTATTTTTTTATTTTTA
>HWI-ST942:56:C4CFMACXX:7:1107:19500:360701
TAATACATAGAGTCCAATAAGCATATCTTGAGTCGGTACCGAAATGGGATCTCCAATAGCTGGAGATAAGAGATTCATATGAGAAAACATAAGTAAAC
>HWI-ST942:56:C4CFMACXX:7:1107:1950:833061
CCCTAAATGAAAGAACCTAATTAGATTCAAGTTCACCAAAAAAATATCTAGATGTTGGTATGCAAATCTGTTTGAATATGAAAGATTCGACTATTATCTT
>HWI-ST942:56:C4CFMACXX:7:1107:19668:658651
GCACAACGACGCAATTATCAGGGGCGCGCTCTACCACTGAGCTAATAGCCCGTCGTGCGGGGCCCCCCCTCGGGGGCCGCGCCGCCGACCCCCAAACAAA
>HWI-ST942:56:C4CFMACXX:7:1107:19738:201761
CCCTCTCGTGTGGCGGCAGGGAGGCGTAAAAAGGAAAGAGAGAGATGGGGTTTCTCTCGCTTTTGGCTTGGCATAGCGGGCCCCCCGCAGGAGGCCCGCC
>HWI-ST942:56:C4CFMACXX:7:1107:20242:749501
ATATTGGTAAGGAATTGGAATGTAATAATATCGATTCATAATGGATTCATATCGATACAGAAGAAAAGGTTCTCTATCGATTCAACAAGTGCTGTACTTA
>HWI-ST942:56:C4CFMACXX:7:1107:20514:288771
GGTTACCTGATGCCATGGAGGGCCCTACTCCCATTTCGGCTCTTATACATGCTGCTACTATGGTAGCGGCGGGCCATTTTTTTTTTACCCGCTCCCTCCC
>HWI-ST942:56:C4CFMACXX:7:1107:20596:45511
ATTCATATCGATACAGAAGAAAAGGTTCTCTATCGATTCAACAAGTGCTGTACTTATGGGAAAGCGATAGAGAAAGAGAAAAAAAAAAACGAAGATTTCA
>HWI-ST942:56:C4CFMACXX:7:1107:20725:491311
AATTACTATATATTTTTTATTAGAAAAAAAATAAGGTGGAATTTGCTACCTTTTTTTATTTTTTATTGAAATTTGTATTTTTTTTTTTTTTTAAAAAAAA
>HWI-ST942:56:C4CFMACXX:7:1107:20796:934281
ATCATATAGCTTTGTATCGGCTAAGTTCACGAGTTGGAGATAAGCGGACTCGAACCGCTGAAATCCGCAACAGGGGAAACAACCCCCTATCAGGCCCCTA
>HWI-ST942:56:C4CFMACXX:7:1107:21052:329691
TTTTCATCTTTGGCTTAAATTTTCAGAAATAGTCGAACGGTCGATTCTTTTTTTTTTTTTTTTCTTTCATGAAA
>HWI-ST942:56:C4CFMACXX:7:1107:21088:624531
CATGAAAGTAAAAAAAAAAAAAAAATGAACCGTTCGACTTTTTCTGAAAATTTAAGCCAAAGATGAAAAAAAAAAAAACTTATATATGTTTTCTAATTTA
>HWI-ST942:56:C4CFMACXX:7:1107:21127:646961
ATAAATCTGGCTATATAAATAAATGAGATACGCGATCCAGTATACCCGTTTGTGAAGTAAAAGAAAATTTAAAATTACGTCCGCATAGAGTCAAAAAGG
>HWI-ST942:56:C4CFMACXX:7:1107:2512:426621
ACCTGATGCCATGGAGGGCCCTACTCCCATTTCGGCTCTTATACATGCTGCTACTATGGTAGCGGCGGGGGATTTTCTTTTTGCTCGGCTTTCTTTTCCT
>HWI-ST942:56:C4CFMACXX:7:1107:2767:753371
TATTTATCTCAGCGGGGTCTACGAAAAATTCTGGGAAAACGTCAACGACTGCTGGCTTATTTGTCAAAAAAAAAATAAATATCATATTAACAAATAAATA
>HWI-ST942:56:C4CFMACXX:7:1107:2910:840191
CCTGTACGGTTATTCAAATTTATCTATTTTTTTTTTTTTTTTTTCCCCGTCTCTTTTTGCAAAAAAAAAAAACCTTTTCTAA
>HWI-ST942:56:C4CFMACXX:7:1107:2925:311291
TATAATTTACGTAAAAACCGTTAGTCAAAATGATTAATTTGAATAAAATTTTACTATCAAAAAAAAAAAAAAAATTTCAATTTTTTCTTTTAAATGAAAA
>HWI-ST942:56:C4CFMACXX:7:1107:3036:340401
CTATCGATTCAACAAGTGCTGTACTTATGGGAAAGCGATAGAGAAAGAGAAAAAAAAAAACGAAGATTTCACATAGTGATTTTTTTTTTTTTTTGATCAA
>HWI-ST942:56:C4CFMACXX:7:1107:3172:955801
TATTCGCGAGGAGCTGGATGAGAAGAAACTCTCACGTTCAGTTCTGTAGTAGAGATGGAATTTCTAATTTAGATCGGGAAGAGCACACGTCTGAACTCCA
>HWI-ST942:56:C4CFMACXX:7:1107:3235:115771
TTTGAATAAAATTTTACTATCAAAAAAAAAAAAAAGATTTCAATTTCTTGTCTTAAATGAAAGGAACGCATTAGACTCAGTAGTAGTATCCTAAGG
>HWI-ST942:56:C4CFMACXX:7:1107:3422:227041
AACGACGCAATTATCAGGGGCGCGCTCTACCACTGAGCTAATAGCCCGTCGTAGGGGGGCCCGCCTCCGGGGCCCCCATTCTGAACAAAAAAC
>HWI-ST942:56:C4CFMACXX:7:1107:3520:404111
TTTTTCGTTTGATATATGGGGGCTAAAAAAAAAAATTATTAAAAATTTCATTTGGAAAAAAAAAATTAAAAAAAAAAAAAAAAAAAAACAAAAAAGAAAA
>HWI-ST942:56:C4CFMACXX:7:1107:4238:912041
ATTATAAGATTTTTTTAATTGTTTTCCTTGAAAAGAGGATCCTAATCTTAGGGAAAATGGAATTTCGACAATCACTGCAAATAAAACAGATATCATTGAA
>HWI-ST942:56:C4CFMACXX:7:1107:4324:827731
CGATAGAGAAAGAGAAAAAAAAAAACGAAGATTTCACATAGTGATTTTTTTTTTTTTTTTTATAAAAAAAAAATTTTTTTAAATTTTTTTTTTCCCCCTT
>HWI-ST942:56:C4CFMACXX:7:1107:4554:1007251
GTAATGGAAATTACATTAGTAGGAATATAAGCTGAAACATCTCCTGACTGGGTCTNGACGNTTGGTAAGGCAGTCATACTCCCTTCANCTAATTGAGAG
>HWI-ST942:56:C4CFMACXX:7:1107:4603:705501
AGAACAAGATGTTTCTTTTGTCCCTTCCAGGCGATCGGAAAATAAAGAAATAGTTAATATATTCAAGATAATTACGTATTTACAAAATACCGTCTC
>HWI-ST942:56:C4CFMACXX:7:1107:4796:434881
ACCAATTATAGCGGATTCATAAATAAATTAACAGAATCCTTCTTTTTGAGATCTAAATTTAGATTTTTTTCTAAAATGAAGAATTAGATCGGAAAGAGCA
>HWI-ST942:56:C4CFMACXX:7:1107:5092:967391
CCCTGTTGAGGTCTAATTCGATCCTTATAGATTTCTCTAGCTATTTTCTTACGAAGCTTTGTTATAGCGTCTATAACAGCCTCTGAGATCGGGAAGAGCA
>HWI-ST942:56:C4CFMACXX:7:1107:5231:802541
TGGGTTCTTCTACTTCATTTTGATTTACTTATTTTTTCTTTATTTTCTCTCTCTTTTCTTTATTTGATTTCTTTTTTGATTTTATTCCCTTCCATCATTC
>HWI-ST942:56:C4CFMACXX:7:1107:5391:868281
AAAAATTCTTTTTTTAAGTTTTCCCTTTTTTCTTCATGGATCAAACTCCAATAAGTAGAAACTTGGTCAAAGGTTTTTTTTTTTTTTTGTAATTAAGG
>HWI-ST942:56:C4CFMACXX:7:1107:5408:380331
AAAGAGAAAAAAAAAAACGAAGATTTCACATAGTGATTTTTTTTTTTTTTTTTTTATAAAAAAAAAAATTTTTTTATTTTTTTTTCCCCCCCTCCCCCAA
>HWI-ST942:56:C4CFMACXX:7:1107:5412:462931
GTTACAATTAATATTTTATTTATTAGTAATTAAATAAAAAAAATAAGTAATACAATGATTTATGATTTTGTGAAAACTATATTTAAAATCTTTGTACAGT
>HWI-ST942:56:C4CFMACXX:7:1107:5775:238691
ACTAACCCGTCAATTTGGGATCCAATTCGGGATTATCCTTGAGGGATATTGGTAAGGAATTGGAATGTAATAATATCGATTCATAATGGATTCATATC
>HWI-ST942:56:C4CFMACXX:7:1107:5983:167361
ATGTGCTTGTGATAAAGAGCATAGGTCATAACCCATTTTTTTTTTATTGGATATTAAATTTTTTATAGTCGAAATAAAATAAAGAGAATTTTTTTTTTTT
>HWI-ST942:56:C4CFMACXX:7:1107:6107:675771
GAGGCAATCTATCAAGGAAAGTAAAAAAAAACCGAAATTTAACCTCTTTTTTTTCTTTTTTTTTTTTATTTTAGCCCAATCACTTCTTAAAAAGTTCCC
>HWI-ST942:56:C4CFMACXX:7:1107:6179:737111
ATATTAAAAACTCAATCAAAATTAAATTATCCACAAGAACACCAATTTTTGTTATGCTTAATATATTTAATTTGATCTGTATTTTTTTTAATTCTACCCT
>HWI-ST942:56:C4CFMACXX:7:1107:6306:81571
AATAAATTCAATCAGATTTATTTTTGATCAAAAAAAAAAAAAAAAACCACTTTGTGAAATTTTCGTTTTTTTTTTTTTTTTCTTTTACCCTTTCCCCATA
>HWI-ST942:56:C4CFMACXX:7:1107:6321:452911
TCTATTACTAATTTCATTGGATCCTGAACCCTCGTTTTTATGACCTTTCCCCCCCCCCCGCCCACCTCTGCCACCTCTTTTTTTTTTTTCTTTTATATA
>HWI-ST942:56:C4CFMACXX:7:1107:6379:504701
CTACGGCGCTGAAGTAACCCATGCTATACTCCCAGGAAAAGCTCAACCGACTTCAACCAAAAGGGAACCGGACCCGGAAACGGAACAAGGGGGGAAGGAA
>HWI-ST942:56:C4CFMACXX:7:1107:6891:609681
TATTACTAATTTCATTGGATCCTGAACCCTCGTTTTTATGACCTTTCCCCCCCCCCCCCCCCCCCCTTTTTTTTTTTTTTTTTTTTTATAAAAAAAGGG
>HWI-ST942:56:C4CFMACXX:7:1107:7320:960731
AATTCTATATATATATCTATATAGTCATAGAATAGTATAGAATTATTAGAATTTCAAATTTACGAAGTAGACTTATAATTTTTTTCCATTGCACATTGTA
>HWI-ST942:56:C4CFMACXX:7:1107:7875:108751
AAATCTATATGGAAATAAAGAAAATTCGAATTTAGAATTTTTCAAAATAAAAAAAAAAAAGATCATTAAAAAAATTAAAAACGGAAAGACAACACGCCTA
>HWI-ST942:56:C4CFMACXX:7:1107:7953:933051	Yes
AAAGTTGCCAGAGTACGATTAACCTCGCCCGAGGTTAATCGTACTCTGGCAACTTTACGTAAAGCAGAGTTTGGTTTTTTGGGGGTGATAGTGGAAAAGT
>HWI-ST942:56:C4CFMACXX:7:1107:8252:137861
TTAGTAAAAGCAAGATGATACTTCAGTAGATGATACCTCAGTAATGGTCGGCATAGCTTAATTGCGGGGGACTTAAAATCCCTGTGTCACATGATAAT
>HWI-ST942:56:C4CFMACXX:7:1107:8309:1003641
TTATCAATTTTTTTTTTCCAAATGAAATTTTTAATAATTTTTTTTTTTACCCCCAATATTTCAACCGAAAAAAAAAAAAGTTAATTTTTTTTTTAAAAAA
>HWI-ST942:56:C4CFMACXX:7:1107:8358:332881
ACTATCTATTCTTTTTTGTATTGTCTAAAAAAAAAAAAAAAAAAAATTTATAAAAAAAAAAAAAAAAAAGCAAAAACCACCTTCTTTTTTTTTTTATAAA
>HWI-ST942:56:C4CFMACXX:7:1107:8610:48751
AAATTTAGAGATACAATCAACAATCGGGGACTAACCCCCCCACCTTTTCTAATTAGTAGAATAAATTAGAAAAGGTGGGGGGGGGGGGGAAAGGGAAAAA
>HWI-ST942:56:C4CFMACXX:7:1107:8747:88661
GGTATATCAAATTCATTTCTTCTTTTTTTCTCATATCAGATAACAAAGATATAATTAAAAAATTTACTTTTTTTTTTTTTTTTTTTTCTCTCATTTTCAC
>HWI-ST942:56:C4CFMACXX:7:1107:8914:555831
TAGAAGTACGTCTTGCTCATTAACATCTCGGAAATATTCTGCCATAGTTAAGGCAGTCAGACCAACTCTCATACGAGCTCCTGGCAGATCGGGAAGAGCA
>HWI-ST942:56:C4CFMACXX:7:1107:8961:157111
TATCTTGACATGTGATGAAGAGATACGGATTATCCTCTGAACAATAATTTTCTAAAAAAAAAAAAACAAAATTTTTAAAACTTAACTTAAAAATCCCCCT
>HWI-ST942:56:C4CFMACXX:7:1107:9155:642681
CAGACTGCTGCTCAGTAATTTGTGAACAGTGGAATTTTGATACAATCTATGAAATCACGCTCTGTAGGATTTGAACCTACGACATTGGGTTTTGGA
>HWI-ST942:56:C4CFMACXX:7:1107:9250:605851
AAGAAAAGGTTCTCTATCGATTCAACAAGTGCTGTACTTATGGGAAAGCGATAGAGAAAGAGAAAAAAAAAAACGAAGATTTCACATAGTGATTTTTTTT
>HWI-ST942:56:C4CFMACXX:7:1107:9308:523391
TCTTTATTTGATTTCTTTTTTGATTTTATTCCCTTCCATCATTCTTAAGTCCCATAAGTTTGATCCTATAGAATCTGACCCATTTTCTCATTGAGCGAA
>HWI-ST942:56:C4CFMACXX:7:1107:9362:724221
GATTTGCCTTTTCTATTGATTCCTACGGATTGGATCAAAGACAATTCTTGAAGGAGGTTTTCAACTTCAGGGAGATTCGGAAGAGCACACGTCTGAACTC
>HWI-ST942:56:C4CFMACXX:7:1107:9484:206911
GTTGAAATTTTAGGTGGTTCCCGAAAAAAAATAGCGAAAAAAATTATCCCTAAAGCGGATACTAAGAGACACGTAAAAACCAATGCATCCACAACTTTGT
>HWI-ST942:56:C4CFMACXX:7:1107:9571:747621
TTATTTAATTCGTGGAAATGCTCGAATTTTATTAGGATTTTATCTATTACACACCATCAAAAGGAGAAGGGGAAAGAGAGGGATTCGAACCCTCGGTAC
>HWI-ST942:56:C4CFMACXX:7:1107:9824:302651
TCATGAGAACTCGGATTTATTAGCAAAAAGACGAGGAAATAGATTTCTCATTCCATTCCAATCGATTCAAGAGCAAGAGAAAGAATTCATACCGCAGTCA
>HWI-ST942:56:C4CFMACXX:7:1107:9835:301001	Yes
ACTACCCCTTGTTGGTCCCGAGGGACGGAGGAGGCTAGGTTAGCCGAAAGATGGTTATCGGTTCAAGGACGCACATTATGAGAAGGGGTCATTCGAGCGT
>HWI-ST942:56:C4CFMACXX:7:1108:10076:176981
CTATTACTAATTTCATTGGATCCTGAACCCTCGTTTTTATGACCTTTCCCCCCCCCCCACCCACGCCCACATTATTTTCTATTATTTTTTATTCTTCAAA
>HWI-ST942:56:C4CFMACXX:7:1108:10425:934281
TCCATTTGAAAACGTAAAGGCCTATTTATGTAAAATTGAGAGAATAAAAAAAAAAAAAAAAAAGAAAATTTTTTAATTAAATTTTTTTTTTTG
>HWI-ST942:56:C4CFMACXX:7:1108:10511:601501
ATACAGAAAAACAGTTTCAACATCAAAAACAACAAAAACTAGAGCAAACATATAATAACGGATTCTAAATTGTAACCAAGCATCCCCGATCGGTTCTATA
>HWI-ST942:56:C4CFMACXX:7:1108:10945:542421
AAATGAAAGGAACGCATTAGACTCAGTAGTAGTATCCTAAGGGGTCCGCTAGTATGGTAGAAAGAGATATCTTTCTACCATACTAGCCATTATGGTTATT
>HWI-ST942:56:C4CFMACXX:7:1108:10979:657881
TGGGAAAGCGATAGAGAAAGAGAAAAAAAAAAACGAAGATTTCACATAGTGATTTTTTTTTTTTTTTTTTATAAAAAATAAATTTATTTGAATTTTTTTT
>HWI-ST942:56:C4CFMACXX:7:1108:11083:268701
AAAAGAAAAAAAGAGGGTTAAGTTTCGTTTTTTTTTTACTTTCCTTGATAGATTGCCTCATCTCATTGTTAAA
>HWI-ST942:56:C4CFMACXX:7:1108:11374:70851
ATAACGGTCCTAAGGTAGCGAAATTCCTTGTCGGGTAAGTTCCGACCCGCACGAAAGGCGTAACGATCTGGGCACTGTCTCGGAGAGAGGCTCGGTGAAA
>HWI-ST942:56:C4CFMACXX:7:1108:11380:362291
TTTTTTTTTCATCTTTGGCTTAAATTTTCAGAAATAGTCGAACGGTCGATTCTTTTTTTTTTTTTTTCTTTCATGAAAAAAAATTTATTTTTTTTTTTTT
>HWI-ST942:56:C4CFMACXX:7:1108:12379:828441
CTTCTTTTTTTCTCATATCAGATAACAAAGATATAATTAAAAAATTTACTTTTTTTTTTTTTTTTTTTTTTTTAATTTTTAAAAAATAGGCCTTTTCCTT
>HWI-ST942:56:C4CFMACXX:7:1108:12439:112791
ATCTTCTAGAAGGATCATCTAGAAAGCAAAATTTTCCGTGAAAGTACCCAGACGGAAAAAAGCTCACATAGATGTTATGGGTCGAATTTTTATTTC
>HWI-ST942:56:C4CFMACXX:7:1108:12456:477631
TCTCGTGTGGCGGCAGGGAGGCGTAAAAAGGAAAGAGAGAGATGGGGTTTCTCTCGCTTTTGGCTTGGCATAGCGGGCCCCCCGCAGGAGGCCCGCACGC
>HWI-ST942:56:C4CFMACXX:7:1108:12735:666551
TATTGGATTCTAAATTAAGGGCAATACCTATAGTACCCTCCTCAAATTCTACTAATCAACCTGCAATAACTTCATAAAAACATTAATAACAACCAATCCC
>HWI-ST942:56:C4CFMACXX:7:1108:12848:117601
AGAATTGGTTGACGATCACGAGGCGCTTCGAATAAGAACTTTCCCTTTGTTTCTTTTTTTTTTTTTTTTTTTTTTAATATTTTGTATTTGTTTTTATTAT
>HWI-ST942:56:C4CFMACXX:7:1108:12865:141251
CCTAGCAACACTTTTTTTCGTTCTATTACTAATTTCATTGGATCCTGAACCCTCGTTTTTATGACCTTTCCCCCCCCCCCCCACCTGCCTTACTCC
>HWI-ST942:56:C4CFMACXX:7:1108:13017:841441
AAGTAAAAGAAATTTTGAGTTTTGGCGCCTTTTATTAGATATTAAAATCCTCTAAAAAAATGATTGATTCATTGATATTTTTTTTTTTCATCAAGATTA
>HWI-ST942:56:C4CFMACXX:7:1108:13326:585111
CATTTTGATTTACTTATTTTTTCTTTATTTTCTCTCTCTTTTCTTTATTTGATTTCTTTTTTGATTTTATTCCCTTCCATCATTCTTAAGTCCCATAAGT
>HWI-ST942:56:C4CFMACXX:7:1108:13352:842131
AGGGATCCCTATGTAAACATAGTATCTATTTAGATACGCTCGAATGACCCCTTCTCATAATGAGAATGTATATAACCTTATTCCGGTCTGGTCCGTATG
>HWI-ST942:56:C4CFMACXX:7:1108:13509:840131
AATCGAAAAGGGATATTTAATTAGGTTCCATAAAAAAAAAAAAGGCTTTAAAAAAAACCTTCTCCCCTTTTTTTTTTAAAAACTTTTTTTTTTTGTTATA
>HWI-ST942:56:C4CFMACXX:7:1108:13577:183211
CATACTTTTCGATTACCTTTCATAACTTATAATTATAGTTCTTTATTCTTTTTTTTTTTCAGTTGCTACAATATTATATTAATTCCTTCTTTTTTT
>HWI-ST942:56:C4CFMACXX:7:1108:13869:265061
GATTAATCGTTTATTTCCAGATGCATTAACATTTCCCTTTTTTTCATTCTAGTTATTAACATCAGAAAGGGGTGAAAAATTTAGAGATACAATCAACAAT
>HWI-ST942:56:C4CFMACXX:7:1108:14134:664011
TTTTACCAAACATCTGCGGGTCCAATCACACGATCTTATAATAAGAACAAGAGATCTTTCTCAATCAATCTCTTTGCCCCTCATTCTTCGAG
>HWI-ST942:56:C4CFMACXX:7:1108:14321:108981
AAAAAAAAAAAGTATTTAAGCCCATCGTGGTTTTCGATTACGAAAAATAATTAGACATCCTATTTTTTTTTTTTTTATCACAAAATCTCTTTTTTTTTCT
>HWI-ST942:56:C4CFMACXX:7:1108:14491:839731
ATTTTATTTATTAGTAATTAAATAAAAAAAATAAGTAATACAATGATTTATGATTTTGTGAAAACTATATTTAAAATCTTTGTACAGTAGTTTTTTTAA
>HWI-ST942:56:C4CFMACXX:7:1108:14589:889901
TAAAGGATTGGAAACGTGAAATGCATGTTAAATGTACTTATAATGGGGTTCAACTATCCGAAACAGAATTTCCAAGAAACTGGTTAACGGATGGTATTCA
>HWI-ST942:56:C4CFMACXX:7:1108:15161:830101
ACAAAATCGAGTCGGGTTAAAGAATGCCCTCTTTCTAGCCTTTTCGTTTTTTAGAAAAAAAAAAAGAAAAACGCTCTTAGTTCAGTTCGGTAGAACGTG
>HWI-ST942:56:C4CFMACXX:7:1108:15188:118221
ACTAATTTCATTGGATCCTGAACCCTCGTTTTTATGACCTTTCCCCCCCCCCCCCCCCCCCCTCACTTCTTTCTTTTTTTTCTTTTTATAAATAATAAT
>HWI-ST942:56:C4CFMACXX:7:1108:15303:165011
CATTCAGAAGCCCGTTCGTAAAAAATTTCCTTTAGTTTTATTCATTCTCTCTAATTTTATTTTTTTTTTATATTTGTTTTTAGCTTATTCACTTTAT
>HWI-ST942:56:C4CFMACXX:7:1108:15505:805591
ACAAATGTGTAAAAGATGCTAGTCGCACTTAAAAGCCGAGTACTCTACCGTTGAGTTAGCAACCCCCCCCAAAAAAAAAAAAACCACTTACAAAATATAA
>HWI-ST942:56:C4CFMACXX:7:1108:15674:577921
ATATACATTATAGAAGGGATAACGATAAAAAGAGGAAGAAGACGAGCTTCAAGAAAAATACCCGCCGCTACCATAGTAGCAGCATGTATAAGAGCCGAAA
>HWI-ST942:56:C4CFMACXX:7:1108:15897:150761
TACTAAGTACTCTATGGTTCGGTTCGTTAGCAGGTTTATTAATAGAGATTAATCGTTTATTTCCAGATGCATTAACATTTCCCTTTTTTTCATTCTAGTT
>HWI-ST942:56:C4CFMACXX:7:1108:1621:418591
GGAGGGCCCTACTCCCATTTCGGCTCTTATACATGCTGCTACTATGGTAGCGGCGGGGGTTTTTTTTTTTGCTCCTCTTTTTTCTTTTTTTTTTTTTTTT
>HWI-ST942:56:C4CFMACXX:7:1108:16271:639151
AATCCAGTCCATATGATGTCTTTTTCGGGAGCTAGGGGAAATGCATCTCAAGTACAGATCGGAAGGAGCACACGTCTGAACTCCAGTCACATGTCAGAAT
>HWI-ST942:56:C4CFMACXX:7:1108:16657:950621
ACTACTACTGAGTCTAATGCGTTCCTTTCATTTAAGACGAGTAATTGAAATCTTTTTTTTTTTTTTGATAGAAAAATTTTATTTAAAATATTCTATTT
>HWI-ST942:56:C4CFMACXX:7:1108:16842:827841
GAAAATATAGAAAAAGGGAGTCTGTGCACCAATATCTGCCATAAAAGGGCCGAGCCATAACAGATGAGAAGCTATACGACTCAATTCCAGCATAATTACT
>HWI-ST942:56:C4CFMACXX:7:1108:17002:624141
TTTACCATTAGCTAGAACTTGTTTTAGTTGCATATCATAAGGAATTTTAACAACTGCTTCAAATACAGTATCAAGATCGGAAGAGCACCGTCTGAACTCC
>HWI-ST942:56:C4CFMACXX:7:1108:17225:520201
TCAACAAGTGCTGTACTTATGGGAAAGCGATAGAGAAAGAGAAAAAAAAAAACGAAGATTTCACATAGTGATTTTTTTTTTTTTTTTTTATAAAAATAAA
>HWI-ST942:56:C4CFMACXX:7:1108:1751:620101
CCTATAGAATCTGACCCATTTTCTCATTGAGCGAAGGGGTACGAAATAAATTCAATCAGATTTATTTTTGATCAAAAAAAAAAAAAAAAATCACTATGTA
>HWI-ST942:56:C4CFMACXX:7:1108:17703:955551
CGAGTCAAGAGATAGATAACATGAAAAAAAGGCTCGAACGGTACGATCCCTCCGTCACCCCAGAATGAAAGGGGTGATCTCGGCTCCCCTACCGATGCAT
>HWI-ST942:56:C4CFMACXX:7:1108:17823:280291
TATTTTTGATCAAAAAAAAAAAAAAAATCACTATGTGAAATCTTCGTTTTTTTTTTTCTCTTTCTCTATCGCTTTCCCATAAGTACAGCCCTTGTTGAAT
>HWI-ST942:56:C4CFMACXX:7:1108:17994:355821
AGAATTAATGATATTCTATATATTCTAGAACAGAATATAGCTCACATAAATAGTGACTATCATTCATCATTAAATAAATAAAACATAACCTTAATTCTAT
>HWI-ST942:56:C4CFMACXX:7:1108:18084:579251
GCTAGCAACAACATAATGGAGGCAGTCAATCAATATAGATTGATCCGAAATATGATTCAAATCCAATTCCAATATAGTCCCTATGGGTCCTTAGCAATG
>HWI-ST942:56:C4CFMACXX:7:1108:1808:839871
ATTTTCAATTTTATCATTTTTTATATATCGGTTTGGTCGATTCCATCTTTTATAATCGAAAACGAGAGTTACAAATGGTTTTTCAAACCATAAAAAAT
>HWI-ST942:56:C4CFMACXX:7:1108:18144:932231
GGAACTTAATTTGAAAGCCATATTTCGACCCGGACGTTTTCGGGATGCCCCTAATAACCAACGAATGGCAAGTGCTTTTCCTTGCGTGGACCTAATTCAA
>HWI-ST942:56:C4CFMACXX:7:1108:18349:79961
AACAATGAGATGAGGCAATCTATCAAGGAAAGTAAAAAAAAAACGAAACTTAACCCTCTTTTTTTCTTTTTTTTTTTTTTTTAAGACAAACCCCTTTTTA
>HWI-ST942:56:C4CFMACXX:7:1108:18368:141201
ATGATGGTTCCGTTGCTTTATATATCATTGTTTTGATTCGTCGATGATTCAGCAATCCCAAAGTGTCTTTTTTTTTTTTTCAGGTTTGAAAAAAAAGTTT
>HWI-ST942:56:C4CFMACXX:7:1108:18567:253441
AATAGCTCACTGATCGAGCGCCCTTGCGCCGAAGATGAACGTGGCTAAGCGATCTGCCGAAGCTGTGGGATGTCAAAATAGATCGGAAGAGCCACGTCT
>HWI-ST942:56:C4CFMACXX:7:1108:18680:892581
ATTGATGGAATTACAAATGGAGTAGGTATTACAAGTTTCTTTGTAGGAGAAGTAACAAAATATATAGGTGGAAGTCGCATCTCTTCTTATCTGTTCTTAT
>HWI-ST942:56:C4CFMACXX:7:1108:18875:435591
TCTTCGTAGACAAAGCTGATTCGGAATTGTCTTTCATTCCAAGTCATAACTTGTATCCATGCGCTTCATAA
>HWI-ST942:56:C4CFMACXX:7:1108:18909:774131
CATTTTATATGTACTAGAAAATAAGAAAAATTCCGGAAAGAAAAAAAAATCCAAATTTGGTAATCGCCTGTTTAGGAATTCTTTCTTCCATCCCATCCCA
>HWI-ST942:56:C4CFMACXX:7:1108:19280:571831
TTGGATCCTGAACCCTCGTTTTTATGACCTTTCCCCCCCCCCCCCCCCCCCCCCCCCCTCTCTATCCTCTTTTTTTTTTTTTTTTTTTTATTTTTTTACA
>HWI-ST942:56:C4CFMACXX:7:1108:19533:232111
TCTTTTTTGATTTTATTCCCTTCCATCATTCTTAAGTCCCATAAGTTTGATCCTATAGAATCTGACCCATTTTCTCATTGAGCGAAGGGGTACGAAATAA
>HWI-ST942:56:C4CFMACXX:7:1108:19885:930031
TTCTTCTTTTTTTCTCATATCAGATAACAAAGATATAATTAAAAAATTTACTTTTTTTTTTTTTTTTTTTCTCTCATTTTTA
>HWI-ST942:56:C4CFMACXX:7:1108:1995:196111
GCTAGGATTGGAAATCCTGTATTTTACATATCCATACGATTGAGTCCTTGGGTTTCCGAAATAGTGTAAAAATAAGTGCTTCGAATCATTGCTATTTGAC
>HWI-ST942:56:C4CFMACXX:7:1108:20102:164411
CACGAGGTACGCCTATCAATTTGAATTTCTGAATCGACCATAGACCAATCGCCTTTTTTTTATTTTGGGGGAATTAATTAACCCACAAATCTTAACCTCA
>HWI-ST942:56:C4CFMACXX:7:1108:20131:806291
GTAAAAAGTAGGTCAGATTTCGCCTATTCCTAATCCTAAATGGAATGTAACGACGTAGGGATCCCTATGTAAACATAGTATCTATTTAGATAC
>HWI-ST942:56:C4CFMACXX:7:1108:20172:378231
GAACTGGATATGGACAGTTCCAATAAGATTTCATTCTTGAACAAAAATCCATTTTAGATCGGAAGAGCACACGTCCTGAACTCCAGTCACATGTCA
>HWI-ST942:56:C4CFMACXX:7:1108:20219:850131
CTCGTGTGGCGGCAGGGAGGCGTAAAAAGGAAAGAGAGAGATGGGGTTTCTCTCGCTTTTGGCTTGGCATAGCGGGCCCCCAGCAGGAGGCCCGCACGAC
>HWI-ST942:56:C4CFMACXX:7:1108:20315:861681
TCTATTACTAATTTCATTGGATCCTGAACCCTCGTTTTTATGACCTTTCCCCCCCCCCCCCCCCCCTCCCCTGTCCTTTCTTCTTTTTCTTCATACTTTC
>HWI-ST942:56:C4CFMACXX:7:1108:20389:48371
TATATGATAGCGGCAGGAAATTCTTTGGCTCTTAATCGGGGCATTCAAGAAGAACAGGCTGTTCCAGCTCGATACCGCCAAGAATTTTTGACTATCGCAT
>HWI-ST942:56:C4CFMACXX:7:1108:20529:817921
ACATGTATTTCTATTACTATGAAATTCATAAATAAAATAGTTAATCGTGGGGTTACCATTCTCTCTTTTTTTTTTTGGTTTTCTCGACTGTGTGCCTAAT
>HWI-ST942:56:C4CFMACXX:7:1108:2056:408331
GACGCCTGCCCGGTGCCGGAAGGTTAATTGATGGGGTTAGCTAACGCGAAGCTCTTGATCGAAGCCCCGGTAAACGGCGGCCGCAACTATAACGGTCCTA
>HWI-ST942:56:C4CFMACXX:7:1108:20933:38471
GCCATAAAAGGGCCGAGCCATAACAGATGAGAAGCTATACGACTCAATTCCAGCATAATTACTCTGATATA
>HWI-ST942:56:C4CFMACXX:7:1108:21333:727591
TGATTCTGCAAAATTTTCTTCAATATTTTTTTCTTGGTTTAATCGAGCTGCTTCGGGATTTCTTTTTGTTCTTTATCTGATTCAAGATCTACATGACCC
>HWI-ST942:56:C4CFMACXX:7:1108:2138:680081
CTCTATCGATTCAACAAGTGCTGTACTTATGGGAAAGCGATAGAGAAAGAGAAAAAAAAAAACGAAGATTTCACATAGTGATTTTTTTTTTTTTTTTTTT
>HWI-ST942:56:C4CFMACXX:7:1108:2383:783011
GAAATGAAATGGTATGACTAGCTTATAAGGTTTTTTCTTTTTTCTATAGAATTCTATATCATTTTTTTTTTACATTTGTATTCATATTCTAATCATAATT
>HWI-ST942:56:C4CFMACXX:7:1108:2768:221721
TGTAAATAGCCCCAGGACTATAGAATAAAGGATTATCCCGAACCTACACCGAGGTAGATCGAAAAGCACACGCCTGAACTCCAATCACATGTTAGAATTT
>HWI-ST942:56:C4CFMACXX:7:1108:2866:764091
CCCAGGCACAACGACGCAATTATCAGGGGCGCGCTCTACCACTGAGCTAATAGCCCGTCGTGCGGGCCCCCTCCCGGGGGGCCCCCCTGCCAACCCAAAA
>HWI-ST942:56:C4CFMACXX:7:1108:2940:1002251
CATACTATGATCATAGTATGATGGCGGTTGAGCAAGTATGCCCCCATCGTCTAGTGGTTCAGGACATCTCTCTTTCAAGGAGGCAGCGGGGATTCGACTT
>HWI-ST942:56:C4CFMACXX:7:1108:2942:56851
ACAAAACGAGAGTATATAGTTTCGAAAAAACGAGTTATGCTTTTCGACGATTA
>HWI-ST942:56:C4CFMACXX:7:1108:3376:22991
TTCTTGAACCCCTTTCACGCTCATGTCACGCCGAGGTACTGCAGAAGAAAAAACTGCAAAATCCGATCCAATTTATCGTAATCGATTAGTTAACATGTT
>HWI-ST942:56:C4CFMACXX:7:1108:3390:195951
GATCCAATTCTGACTGGTAATAGATACCGGGACTTTGCAATATTTGATTGATCACAATTCGGTAAATTCCGTTTACTATA
>HWI-ST942:56:C4CFMACXX:7:1108:3453:835201
TATCAGAGTAATTATGCTGGAATTGAGTCGTATAGCTTCTCATCTGTTATGGCTCGGGCCCTTTTTGGCCGAGATTTGGGGACAAACACCCCTTTTTTTT
>HWI-ST942:56:C4CFMACXX:7:1108:3464:980321
ATACCTATCAAAGATATTATATACATTATAGAAGGGATAACGATAAAAAGAGGAAGAAGACGAGCTACAAGAAAAATACCCGCCGCTACCATAGTAGCA
>HWI-ST942:56:C4CFMACXX:7:1108:3577:665911
AAAAACGAGCAATATAAGCCTTCTTTAAATAAGAAAGAGGGCTTATATTACTCGTTTTTTTCTATAAAAATGAGCAAATTTTTATAGAGTATCATATTTT
>HWI-ST942:56:C4CFMACXX:7:1108:3691:80891
AGTACAATTATATTTAGTATCCTTAATGTAAGGATCATAGTGCAGATCGTTGTCACCTTTAGATCTATTATTTAGATAACTAGAACTACAATAACTATAA
>HWI-ST942:56:C4CFMACXX:7:1108:3877:720521
TTTTTAAATTTTGCATCGAACAAATGTCTATAGCTATTTTTCTAGGTATCATTAATATTCCAAGAATTACTACACAACTTTTTTTTGAATCAACAAAAAA
>HWI-ST942:56:C4CFMACXX:7:1108:4133:721671
GAATTTGATTAATTTATTTATTCCTTTTCTACATGTAGAAGAAGAAACGTTCTATTTAGAGAACAATCAACATCAAGTTACTTTACCCTTTTTTCCTTTT
>HWI-ST942:56:C4CFMACXX:7:1108:4351:723711
TTCAATAACTTACCCTCTATTTTTGTGCCTTTAGTAGGCCTAGTCTTTCCGGCAATTGCAATGGCTTCTTTATTTCTTCATATTCAAAAAAATAAGATTT
>HWI-ST942:56:C4CFMACXX:7:1108:4816:703481
AGTTAGCTAGGTCGATAATATACTTCCCTAGCCACAATTCTGCTATTTACATTTACTA
>HWI-ST942:56:C4CFMACXX:7:1108:4848:196251
ATGAAATTTTTAATAATTTTTTTTTTTAGCCCCCATATATCAAACGAAAAAAAAAAAAATTTTTTTTTTTTTTAAAAAAAAAAGGGGGAAGTACTTTTTC
>HWI-ST942:56:C4CFMACXX:7:1108:4872:819381
ATATAGTCATAGAATAGTATAGAATTATTAGAATTTCAAATTTACGAAGTAGACTTATAATTTTTTTCCATTGCACATTGTAGAATTCTAAGTTTCAATA
>HWI-ST942:56:C4CFMACXX:7:1108:5097:468911
CCTAAGTCAAAGGGTCGAGAAACTCAAGGCCACTATTCTTGAACAACTTGGATTGGAGCCGGGCTTTCCTTTCGCACTTTATACGGGTATGAAATGAAAA
>HWI-ST942:56:C4CFMACXX:7:1108:5244:161371
ATTAGAATTCGAAATTCTCTACGTCGTTTAGGGGATAGAATTTTTTCAGGGACAAAGAAATCATAATTATTTTTTTTTTTTTTTACAGTTTTTTTTT
>HWI-ST942:56:C4CFMACXX:7:1108:5443:626331
GTGTCGATCTTGTCCTTCTTGATTCAATTCGTTAAAAACTCCTATTCTTAGTTTACATATATATATATATATTATAGTAGTTACTTTTTGTAGTTTTCTT
>HWI-ST942:56:C4CFMACXX:7:1108:5558:313871
ACAAGAATGAAGAAAATGGAGAAAAAAAAAAAATACTCTTTATTTTATTTCGCCTATAAAAAATTTAATATCCAATAAAAAAAAATGAGTTATGACCTAT
>HWI-ST942:56:C4CFMACXX:7:1108:5786:405121
TTCATTTCTTCTTTTTTTCTCATATCAGATAACAAAGATATAATTAAAAAATTTACTTTTTTTTTTTTTTTTTTTCTTAATTTTCTACATATAGACGCTT
>HWI-ST942:56:C4CFMACXX:7:1108:5787:726981
TTTGTTGTATTCAATTCACAATTCAAAGGTTTTTTTTCTTTCTTTACCTAACTACAAGGGGGTGGGGTTTTTCATTCTATTTTCTATATA
>HWI-ST942:56:C4CFMACXX:7:1108:5883:370471
AAACGTTCTATTTAGAGAACAATCAACATCAAGTTACTTTACCCTTTTTTCCTTTTCATAATCGATTAGTTAACCTAAGAAAAAAAAAAAAAACAAAA
>HWI-ST942:56:C4CFMACXX:7:1108:5942:890901
GGATAGAGTAGTTCTTGATCATAATTTCCAATATGCGGACTGCGTACAACAAAAAACTTGTGATTGGTAGTAAAAGATCGGAAGAGCCACGTCTGAACTC
>HWI-ST942:56:C4CFMACXX:7:1108:6304:574411
TTTGATTCGTCGATGATTCAGCAATCCCAAAGTGTCTTTTTTTTTTTTTAGGGTGGAAAAAAAAATTTTGGAAGCTGGAATGTGCCCGGAATGGGA
>HWI-ST942:56:C4CFMACXX:7:1108:6452:878841
GCATAAGTGAATATATAACCTACAGAAAAGTGAGCTAATCCAACCAATCTTGCTTGCACGATTGAAAGAGCTACTGGTTTATCTTTCCAGCGAATCAAAT
>HWI-ST942:56:C4CFMACXX:7:1108:6853:534161
GTATAACTTGTACAAATCTTTCCATTTTCCAATTCGATCCGATCCATTAGTTCGTAGAGCTATTTACTCGATTGCAGATCGGAAGGAGCACACGTCTGAA
>HWI-ST942:56:C4CFMACXX:7:1108:6883:634391
GCATTTCACGTTTCCAATCCTTTAAATCCTGGGACCACTCGGGAAATTGAAATAATAACATACGGACACTGTTTTTAATTATTATCAATAAAGGTAATAT
>HWI-ST942:56:C4CFMACXX:7:1108:6912:640461
ATTTCTTTTTATTTTCAATAAAAAGAATAAAAAAAAGGACAGAGTTCCTTTTTTATAGTTTAGCTAGAAGAGGAGATTATATGA
>HWI-ST942:56:C4CFMACXX:7:1108:6946:120071
CCTATCTTTTCTTTCATCTCGGGTGAAATACGATCGGGGGGGGCTAATTCAAAACCTCCCGGAAAATAAAAACAACTCCCCAAATCAAAACCCCCTTTTT
>HWI-ST942:56:C4CFMACXX:7:1108:7020:658851
ATTTACGAAGTAGACTTATAATTTTTTTCCATTGCACATTGTAGAATTCTAAGTTTCAATAATAATAATAATAAATTTCTTTTCATGAAAGTAAAAAAAA
>HWI-ST942:56:C4CFMACXX:7:1108:7416:247471
GTATTGATAAGACCATTCACTATTTCTTGAAGCTCAATCTCTCCCCCGGATGAACCATATAGCCAAGAGAAAGATCGGAAGAGCAACACGTCTGAACTCC
>HWI-ST942:56:C4CFMACXX:7:1108:7534:31871
ACATTTCTTATGTACCCATAGGGACTATATTGGAATTGGATTTGAATCATATTCCGGTTCATCTAATATTATTTGATTCCTCCAATAATGTTGTTCCTGC
>HWI-ST942:56:C4CFMACXX:7:1108:7738:724001
GATGCCATGGAGGGCCCTACTCCCATTTCGGCTCTTATACATGCTGCTACTATGGTAGCGGCGGGGATTTTTTTTTTTGCTCCTCCTTTTTCTCTTTTTT
>HWI-ST942:56:C4CFMACXX:7:1108:8027:248951
TTAGCTAAAGATTAGATAAAAAAGGCGCGAACTCAAAAAAGAAATAAATAAAACCATAATCATAGAAATAGAGAATCCTTTTTTTATTTTGTCTCGTCAA
>HWI-ST942:56:C4CFMACXX:7:1108:8299:417521
TTTTTTTTCAATATGAAAAAGTAATAAGAATGAGAGGTGTTAAGCTTTTCATCATCCTGGCGTCGAGCTATTTTTCCGCAGGACTCCCCTAACAGAACGT
>HWI-ST942:56:C4CFMACXX:7:1108:8503:213631
CGAACAGCCCAACCCTTGGAACATACTACAGCCCCAGGTGGCGAAGAGCCGACATCGAGGTGCCAAACCTTCCCGTCGATGTGAGCTCTTGGGGAA
>HWI-ST942:56:C4CFMACXX:7:1108:8622:438451
AGGTTCCCTAGCAACACTTTTTTTCGTTCTATTACTAATTTCATTGGATCCTGAACCCTCGTTTTTATGACCTTTCCCCCCCCCCCCCCCCCACCCCCTT
>HWI-ST942:56:C4CFMACXX:7:1108:8677:656271
ATCGATTCCATTTGAAAACGTAAAGGCCTATTTATGTAAAATTGAGAGAATAAAAAAAAAAAAAAAAGAAATTTTTTTATTTTTATTTTTTTTTTTT
>HWI-ST942:56:C4CFMACXX:7:1108:8841:586301
ATAGTTCAACTCTTTGACAACACGAAAAAACCATTGTTCAACTCTTTGACAACAGATCGGAAGAGCACCACGTCTGAACTCCAGTCACATGTCAGAATCT
>HWI-ST942:56:C4CFMACXX:7:1108:9707:247591
AGCGAAAGATTTCTCATCTCTATGGGATTAAATCCCGAGATATTCCAAAGAAAAAAAAAATAATAATAATAAACGATTAAATTATGGAAGTAAATATTCT
>HWI-ST942:56:C4CFMACXX:7:1108:9708:819271	Yes
TAACGATCTGGGCACTGTCTCGGAGAGTCTCTCCGAGACAGTGCCCAGATCGTTACGCCTTTCGTGCGGGTCGGAACTTACCCGACAAGGAATTTC
>HWI-ST942:56:C4CFMACXX:7:1108:9720:442711
TTTTTATTCGTACTTTTTTGTTATATTCTAGTTGATGGAATCCGGTGAATTATTTTTCATATTGAAATGAA
>HWI-ST942:56:C4CFMACXX:7:1108:9844:587171
GAAAAAAAAAAACGAAGATTTCACATAGTGATTTTTTTTTTTTTTTTTTATCAAAAAAAAAACTTATTTAATTTTTTTTGTACCCCTTCCCTCAAAGAAA
>HWI-ST942:56:C4CFMACXX:7:1109:10292:205701
CCTATAGAATCTGACCCATTTTCTCATTGAGCGAAGGGGTACGAAATAAATTCAATCAGATTTATTTTTGATCAAAAAAAAAAAAAAAAACACATTTGT
>HWI-ST942:56:C4CFMACXX:7:1109:10414:992511
GCTTCCAGAGCTACTCGGTTGGCTACGGCACCCGGTGCATTTCCCCAAGGGTGGCCTAAAGTTCCTCCACCGAATTGTAGTACAGAGATCGGGAAGAGCA
>HWI-ST942:56:C4CFMACXX:7:1109:10474:216771
CGATTCTTTTTTTTTTTTTTACTTTCATGAAAAGAAATTTATTATTATTATTATAAAATATAATTATTCAATGAGGAATAGAAAAAAAATATAATAATTC
>HWI-ST942:56:C4CFMACXX:7:1109:10480:781531
TATCAGAGTAATTATGCTGGAATTGAGTCGTATAGCTTCTCATCTGTTATGGCTCGGCCCTTTTATGGCGGAAATTGGTGACAAACCTCCCTTTTTTTTT
>HWI-ST942:56:C4CFMACXX:7:1109:11050:457101
GCAGAATGAGACGGGATAACAAAAAAAAAAAAAATAGATAAATTTGAAAAACCGGACAGGCTTTTTTTGTGCATTGCATACGGCTCCCCAATGGGATT
>HWI-ST942:56:C4CFMACXX:7:1109:11196:491781
ACGGACACTGTTTTTAATTATTATCAATAAAGGTAATATAATATATTTTCTAAGAATTGATTGAGTTACTAAGAGAGAACCTCTTATTATTTGAGCAAAT
>HWI-ST942:56:C4CFMACXX:7:1109:11280:767511
AGAAGAGATGGGAAACATGCTCAATATCATTTGCTTGAATAGTTGACCCAGCTCCTTGCTGTTTGCAGAAACCCTCCACTTCAATTGGTATTTTTTCAC
>HWI-ST942:56:C4CFMACXX:7:1109:11298:856851
ACCCCGCTTAATGTCTTTTTGAGCAAGAGCTAAAGTGGCTCCTAAGAGTACTGTTATTATACCTATCAAAGATATTATATACATTATAGAAGGGATAAC
>HWI-ST942:56:C4CFMACXX:7:1109:11303:46601
TATTACTTTTTCATATTGAAAAAAAAAATGAAAAATGAAAAGGTTGTCTTATTCAAAACCCCAATTATGAAATCATCCCCCTTCCCACCCCGGACCCCCC
>HWI-ST942:56:C4CFMACXX:7:1109:11459:581341
AGAAAGAGAAAAAAAAAAACGAAGATTTCACATAGGGATTTTTTTTTTTTTTTTTGGCAAAAAAAAAATTCTAATGAATTATATTCACTCCCCCCTTCTA
>HWI-ST942:56:C4CFMACXX:7:1109:11925:911731
TTTTGTATTGTCTAAAAAAAAAAAAAAAAAAAAATTTCAAAAAAAAATAAAAAAAGGAAGAAAATTCCACCTTATTTTTTTTTTAATAAAAAATATTTAA
>HWI-ST942:56:C4CFMACXX:7:1109:12218:966431
ATTCCACTCTTTATAGGTCCAAAAATCCTTTCACAAAATAATCCATCTTTTTCCGGTTTATTGGTTTTGTAATGAAAAGTATAGGGTTTTGTCACCTCTC
>HWI-ST942:56:C4CFMACXX:7:1109:12274:613881
AACCCCCCCACCTTTTCTAATTAGTAGAATAAATTAGAAAAGGTGGGGGGGGGGGGGAAAGGGCATAAAAACGAGGGTTCAGGATCCAATGAAATTAGTA
>HWI-ST942:56:C4CFMACXX:7:1109:12363:113531
AATAGTAATGGAACTCTGTGCAAAGTTTCCTCCAGTAATATGAGTTACCACCCCTTGATCACTTATACTAA
>HWI-ST942:56:C4CFMACXX:7:1109:12372:242561
ATCAGAGTAATTATGCTGGAATTGAGTCGTATAGCTTCTCATCTGTTATGGCTCCGCCCCTTTTTGTCAGATATTTGTGCTCCAACTCCCCTTTTCTTTT
>HWI-ST942:56:C4CFMACXX:7:1109:12595:886331
AAATAAAAAATTTTTAACTTTTTTGAGTACGAGTACTTGTCAATAAAAAAAATAAAATGTATTCCAAATTTATTCAAATGAGGTTTTCGGTAACGTATCA
>HWI-ST942:56:C4CFMACXX:7:1109:1281:335521
ATTCAATTGTCAACTACTCCTATCGGAAATAGGATTGACTACGGATTCGAGCCATAGCACATGGTTTCATAAAACCGTACGATTCTCCCGATCTAAATCA
>HWI-ST942:56:C4CFMACXX:7:1109:12901:656341
ACCAAAACAAAAAACTTTTTCTTGGTTGGTGTAATCCGTTGGACATAAATCCAATTTTTAAATTTTTTGGATTCCTTCGAGTTTTTTTTTCCTCTTCCT
>HWI-ST942:56:C4CFMACXX:7:1109:1309:613241
CTTAATACAATCTCGTTCAAATTCATTAAAATTTCATGTACTGATTCTTGAATACCTGAGATCGGAAGAGCACACGTCGAACTCCAGTCACATGTCAGAA
>HWI-ST942:56:C4CFMACXX:7:1109:13146:661911
ATATCAGAGTAATTATGCTGGAATTGAGTCGTATAGCTTCTCATCTGTTATGGCTCCGCCCCTTTTTTGCAGATATTGTGGGCCAAACTCCCCTTT
>HWI-ST942:56:C4CFMACXX:7:1109:13351:722151
TCTTCTTTTTTTCTCATATCAGATAACAAAGATATAATTAAAAAATTTACTTTTTTTTTTTTTTTTTTTTTTTCATTTTTACTTAAATAGGCTTTTCTTT
>HWI-ST942:56:C4CFMACXX:7:1109:13521:793451
CCCTAGCAACACTTTTTTTCGTTCTATTACTAATTTCATTGGATCCTGAACCCTCGTTTTTATGACCTTTCCCCCCCCCCCAACCCAATGGAATTTATTT
>HWI-ST942:56:C4CFMACXX:7:1109:13557:570861
TTTCTCTCTCTTTTCTTTATTTGATTTCTTTTTTGATTTTATTCCCTTCCATCATTCTTAAGTCCCATAAGTTTGATCCTATAGAATCTGACCCATTTTC
>HWI-ST942:56:C4CFMACXX:7:1109:13600:246221
GGAGCATGTGCTTTAATTCGAAGCAACGCGAAGAACCTTACCAGCCCTTGACATGGTCGGACGACTTCCAGAGATGGATTTCTTCCCTTCGGGGACCGAC
>HWI-ST942:56:C4CFMACXX:7:1109:13697:464731
CTATCAAGGAAAGTAAAAAAAAAACGAAACTTAACCCTCTTTTTTTCTTTTTTTTTTTTATTTTAACCAAACCATTTTTTAAAAAGTTCCCGACCTACAC
>HWI-ST942:56:C4CFMACXX:7:1109:13800:246771
CTATTAATCGGCTAATAAGTCGTTTAATAGCAGTTCCATCTATCACTTTATTGTGAA
>HWI-ST942:56:C4CFMACXX:7:1109:14035:31821
AAAAAGGTGGATTTATAAGTTAAGTTATCAAAAATTTGCTTTTTTTTTTTTTGAAAATTTTTTTTTAAGAGGAAAATCGGTTTTTTTTCATAACTTTCAA
>HWI-ST942:56:C4CFMACXX:7:1109:14365:441031
AAATTCCCTTTTCTTAGGACCACATGCGAGATAACGAAAAAAAAAAAGAGAGAATGGTA
>HWI-ST942:56:C4CFMACXX:7:1109:14413:422591
ATGAATTGAAAGATATTAATTTTACTGATCAGTAATAATAATGGTAGTTTTTTTGTACAAGGATCTTAATTTAATTAA
>HWI-ST942:56:C4CFMACXX:7:1109:14495:725181
AACCTATCACTAAAATACTCCTAGAGGGGGATAGGGCTAAGCGGAGGGAAAAGGGTTTTCAATGAGCGGGGAAATGAAACCTATTAGCCCCACCCGAGAC
>HWI-ST942:56:C4CFMACXX:7:1109:14669:207961
AGAGGATTGTACCATAGAAGCACGGAGGTAAACCTCTTTCCAATATATAAATTCTGGCAATGTAGTTGGGCTTTCAGATCGGAAGAGCCACGTCTGAACT
>HWI-ST942:56:C4CFMACXX:7:1109:1499:74861
AAGGATTGTTGTCTCAATGAATAATTGTAGGAGTTAAATCTTGATAGAATTAAAAAAACTACAAAAAAAATCCAGATAGGGAAGAGCACACGTCTGAACT
>HWI-ST942:56:C4CFMACXX:7:1109:15094:397781
GATAAGTTGTGAAGAGTTTAACCATAGATAATCTCTTAACCATCCCATCAAATAAGTGGAAGATTCATTAAACTGTGAAACGTTACCCTGCCATAATGT
>HWI-ST942:56:C4CFMACXX:7:1109:15094:838351
TCTCTCTTCATATTTGGATTCCTATCTAATGATACAGGACGTAATACGGGACGGGAAGAAAAAAAAAAAAAAAAAATTTTTTTTTTTTTTTTTTTTTTTT
>HWI-ST942:56:C4CFMACXX:7:1109:15118:229241
CCTACTGCTTTTTTGCTTATAATTTACGTAAAAACCGTTAGTCAAAATGATTAATTTGAATAAAATTTTACTATCAAAAAAAAAAAAAAAATTTAAATTT
>HWI-ST942:56:C4CFMACXX:7:1109:15302:886611
AGATACCTCGTTACTGCTCTTCTGAGCAGTAATAGGTAGGGATGACAGGATTTGAACCCGTGACATTTTGTAGATCGGAAGAGCACCACGTCTGAACTCC
>HWI-ST942:56:C4CFMACXX:7:1109:1544:346901
GTTGTAAGTTTCTTCTTCTTGCCCGAATCTGTAACCTTCATTAGCAGATCGGAAGAGCACAGTCTGAACTCCAGTCACATGTCAGAATCTCGTATGCCGC
>HWI-ST942:56:C4CFMACXX:7:1109:15702:717731
AGGTCAAAAAAGTCAATTCCATTGTGGAGCCGTATGCAATGCACAAAAAAAGCCTGTACGGTTATTCAAATTTATCTATTTTTTTTTTTTTTTTTTCCCC
>HWI-ST942:56:C4CFMACXX:7:1109:15727:651511
TCCCTTTTTTTCATTCTAGTTATTAACATCAGAAAGGGGTGAAAAATTTAGAGATACAATCAACAATCGGGGACTAACCCCCCCACCTTTTCTAATTAGT
>HWI-ST942:56:C4CFMACXX:7:1109:15769:850981
TTCTAATTGGTCAATAAAAATATATTGAAAGGCTAGTTCTTTTGTTTTTTTTTTTTTTTTTTGGTTAAACAAATGGTTTTTAAAAGGGAAAAAGGGGAAA
>HWI-ST942:56:C4CFMACXX:7:1109:15802:801251
ATAAGATCGTGTGATTGGACCCGCAGATGTTTGGTAATAAGAATAATCTTATCCTTTTGAGAATAATCAAAAATAGAAA
>HWI-ST942:56:C4CFMACXX:7:1109:15821:783821
CATTTTATTTTTTTTATTGACAAGTACTCGTACTCAAAAAAGTTAAAAATTTTTAATTATTTAATTTTTTTTAAGAACGGTTTCTTTGAACTTGGTGAAT
>HWI-ST942:56:C4CFMACXX:7:1109:15872:955111
ATCGATATCATCGATCTCATAAGTATCATACCAAATCCCATCAATCGAATCACTTTTCGAGAAAAACCAGGCATCTAAGTCCATCAAGTAAAGAAATCTA
>HWI-ST942:56:C4CFMACXX:7:1109:15899:186751
ATCTAAAAATCGTCTAGTACGGAATCTTTTCAAGAAGTGATTGGTCTAACATAAAAAAAAAAAAAAAAAAAAGGGGGAGAATTTTTGTTTTTTTTTTTTT
>HWI-ST942:56:C4CFMACXX:7:1109:15908:537771
TAAAGTCTTTATTTTCTTGAGTTCTGAAATGACACATAGTGCGATACAGTCAAAATAAGGTATTAGAGATCGGAAGAGCACACGTTGAACTCCAGTCACA
>HWI-ST942:56:C4CFMACXX:7:1109:16018:151551
TATTAATAAGTATAAGTAGTTGAATCTAAATCATGAATTGTCGGATGACTCATTATTCAGATAAAGAATAAAGAACTTTTTTTTTTCTTTTTTGCGTGTT
>HWI-ST942:56:C4CFMACXX:7:1109:16239:205781
TAGAAAAAAAATAAGGCGGAATTTGCTACCTTTTTTTATTTTTTATTGAAATTTGTATTTTTTTTTTTTTTTAGACAATACAAAAAAGACTAAATATAA
>HWI-ST942:56:C4CFMACXX:7:1109:16403:62351
GAATTCGAAATTCTCTACGTCGTTTAGGGGATAGAATTTTTTCAGGGACAAAGAAATCATAATTATTTTTTTTTTTTTTTCAGTTTTTTTTTTATATTTT
>HWI-ST942:56:C4CFMACXX:7:1109:16563:475541
GGATCTGTTCGAGCAGATAAACATATAATAAATAGAAAACTTTTTTTTTACCACTTTACTTTTTCCTTGATTTTTTTTTA
>HWI-ST942:56:C4CFMACXX:7:1109:16668:430131
ATCAGAGTAATTATGCTGGAATTGAGTCGTATAGCTTCTCATCTGTTATGGCTCCGCCCCTTTATGGCAGAAATTGGGGGACCAACCCCCCTTTTCTTTT
>HWI-ST942:56:C4CFMACXX:7:1109:17136:278131
ATTTGTTTTAAACAAGAGACAGAAACAAAGATAAAATTATTCAGAGATAATTACAATATGCTTCCTATGATAACCGGGTTCATGAATTATGGTCAACAAA
>HWI-ST942:56:C4CFMACXX:7:1109:17273:656571
TTAGAAAAAACTAGAGTTGACTTAAGAAAATTAGTAAAAGCGAATTCAATTCCACTTTTTTTTTTATTAGATCGGAAGAGCACACTCTGAACTCCAGTCA
>HWI-ST942:56:C4CFMACXX:7:1109:17426:426971
TATTAGAATTTCAAATTTACGAAGTAGACTTATAATTTTTTTCCATTGCACATTGTAGAATTCTAAGTTTCAATAATAATAATAATAAATTTCTTTTCAT
>HWI-ST942:56:C4CFMACXX:7:1109:1742:706001
TAAGAAATAAAATTTTTGATCGGAAGATTAATCAAACCGAGAGACCCTTTAACTATTAAGATCGGAAGAGCACCGTCTGAACTCCAGTCACATGTCAGAA
>HWI-ST942:56:C4CFMACXX:7:1109:17649:137941
GTATGGTTACCTGATGCCATGGAGGGCCCTACTCCCATTTCGGCTCTTATACATGCTGCTACTATGGTAGCGGCGGGGATTTTTTTTTTTTCTCCCCTTT
>HWI-ST942:56:C4CFMACXX:7:1109:17665:661811
TAAATAGAAAACTTTTTTTTTAACCACTTTACTTTTTCATGTATTTTTTTTCATTATTAAACTAAAAATTTCCAGAAAAGGGTTTAATTTTTACTTGTTT
>HWI-ST942:56:C4CFMACXX:7:1109:17702:989721
ATTTACGAAGTAGACTTATAATTTTTTTCCATTGCACATTGTAGAATTCTAAGTTTCAATAATAATAATAATAAATTTCTTTTCATGAAAGTAAAAAAAA
>HWI-ST942:56:C4CFMACXX:7:1109:17926:62961
CTAGTACGGAATCTTTTCAAGAAGTGATTGGTCTAACATAAAAAAAAAAAGAAAAAAAGAGGGTTAAGTTTCGTTTTTTTTTTATTTTCCTTATTAGTTT
>HWI-ST942:56:C4CFMACXX:7:1109:17947:323801
CACATAGTGATTTTTTTTTTTTTTTGATCAAAAATAAATCTGATTGAATTTATTTCGTACCCCTTCGCTCAATGAGAAAATGGGTCAGATTCTATAG
>HWI-ST942:56:C4CFMACXX:7:1109:17971:207841
TGTCGGATGACTCATTATTCAGATAAAGAATAAAGAACTTTTTTTTTTCTTTTTTCCGTGATTTAATACTTGGTTATTAAAATATTTTAGAACAACTAAT
>HWI-ST942:56:C4CFMACXX:7:1109:18095:40271
ATGTGGCTGAGAGCCCTCACAGCCCAGGCACAACGACGCAATTATCAGGGGCGCGCTCTACCACTGAGCTAATAGCCCGTCGTGCGGGCCCCCCCCCTC
>HWI-ST942:56:C4CFMACXX:7:1109:18146:721581
CTAGTTATTAACATCAGAAAGGGGTGAAAAATTTAGAGATACAATCAACAATCGGGGACTAACCCCCCCACCTTTTCTAATTAGTAGAATAAATTAGAAA
>HWI-ST942:56:C4CFMACXX:7:1109:18714:692991
GAAGAGTTTAACCATAGATAATCTCTTAACCATCCCATCAAATAAGTGGAAGATTCATTAAACTGTGAAACGTTACCCTGCCATAATGTGATGTGTTTCC
>HWI-ST942:56:C4CFMACXX:7:1109:19060:59151
CAAGCCTCCCGGAATTTGATTAATTTATTTATTCCTTTTCTACATGTAGAAGAAGAAACGTTCTATTTAGAGAACAATCAACATCAAGTTACTTTACCCT
>HWI-ST942:56:C4CFMACXX:7:1109:19079:138101
GTATGGTTACCTGATGCCATGGAGGGCCCTACTCCCATTTCGGCTCTTATACATGCTGCTACTATGGTAGCGGCGGGGGTTTTTTCTTTTTCTCTGTTTT
>HWI-ST942:56:C4CFMACXX:7:1109:19159:974321
AAAAAATCATATTTGAGAACCATAGCCTTTCGTTATTCTTTGGTAAGTCCGCTTTACTTTGATTCTCTATTAACCAAAAATTGGGACAATTAATTCAAAA
>HWI-ST942:56:C4CFMACXX:7:1109:19306:934551
GGACTCTAGAAATACTTCTAATTGCGGTAATAATCAAACTCTATCAACCTGTATCAATTGTTTTCGTTTTCTAGACCGTTCGGCAATTTTTTTTAA
>HWI-ST942:56:C4CFMACXX:7:1109:19317:74611
TTTTGATAGAATAGATAAACTTTTTTTTTTTTCGTTTGATATATGGGGGCTAAAAAAAAAAATTATTAAAAATTTAATTTGGAAA
>HWI-ST942:56:C4CFMACXX:7:1109:1940:483501
TAATCTTCTTTTTTTTATTGAAGAGTTTTTTTTCTATCTAAATTTAAGTATGTATCTATCAAAAAAAATAGTATATACAACAGATAACCTCGGACCACAC
>HWI-ST942:56:C4CFMACXX:7:1109:19543:625831
AATTACTACACAACTTTTTTTTGAATCAACAAAAAAAATTCTTGATAAATATATTTACAAGAATGAAGAAAATGGAGAAAAAAAAAAATACTCTTTATTT
>HWI-ST942:56:C4CFMACXX:7:1109:19544:681901
CCCCCCATAAACCGAAAATCCATAACCCCAAGGGCTACCGGAATACCGTTTAGTTGACCTGTACCTGTTTAGATCGGGAAGAGCACACGTCTGAACTCCA
>HWI-ST942:56:C4CFMACXX:7:1109:19606:715681
GAATAAGCATGAGTAATCAAATGAAATAAAGCAGATCGATAAGACCCCATACCTAGAGCTAACATCATATAACCGAGTTGAGACATTGTAGAATAGGCTA
>HWI-ST942:56:C4CFMACXX:7:1109:1965:988141
TTAATTGGGGCTTTAAATTAGTAGAAATGATCAGACAGTACTCCCCAAGATTCCGATTCAGAGTATGCTCCTATCCACCGACAAATGTAATGACTATCA
>HWI-ST942:56:C4CFMACXX:7:1109:1990:343711
ATGCATACATTTGTCTCATACACTATGGGGATGGTGAGAAGAGATATATATTTTATCCCCCAGAGGCGCTATTTTTAGAGATACTTTTGTTTGTGGTA
>HWI-ST942:56:C4CFMACXX:7:1109:20233:598211
ATCCCCTAAACGACGTAGAGAATTTCGAATTCTAATTTGTTTCAACTTAAAAAAAAAAAATCCCCGGGTTACAATTCAAAAGTTGGATAAAAATTTCAAA
>HWI-ST942:56:C4CFMACXX:7:1109:20388:776371
AAGGTAAATCAGCCGCTATTCCTCCAATACGAAAAAAATTATGCATCATTCTCATACCGGTGGCAGCTTCGAATAGATCATATACAAATTCTCGTTCTCT
>HWI-ST942:56:C4CFMACXX:7:1109:20457:939601
TAATTATTTTCCGTAATCGAAAACCACGATGGGCTTAAATACTTTTTTTTTTTGGGGGTTTTTTTTTAAAGGTTTAAGTAATACCTCAAAAACAAGAATT
>HWI-ST942:56:C4CFMACXX:7:1109:20534:520411
AACTCCTAAAGAAGCACTTCATCAAGCCTCCCGGAATTTGATTAATTTATTTATTCCTTTTCTACATGTAGAAGAAGAAACGTTCTATTTAGAGAACAAT
>HWI-ST942:56:C4CFMACXX:7:1109:20769:508201
TGACTCTTTGTCCCTCTATTAGAGGTGTTCCAGAAATGTCTGCAATCGAGTAAATAGCTCTACGAACTAATGGATCGGATCGAATTGGAA
>HWI-ST942:56:C4CFMACXX:7:1109:20832:278651
GTCAAGTGAAATCCAATCCACGAAATAATTTGATCTGTGGGCAGCATCATTGTGGTAAAGGTCGTAATGCCAGAGGAATAATAACGCAAAGGCTTGGGG
>HWI-ST942:56:C4CFMACXX:7:1109:21078:174251
AAAAGATCTTTTTTTATTATTGTCTCAAGGTAGTGATGGGAACAATACGAATCCCCTTTTTTGAAACAAAAAAAAACAAACCATTCTTTTTTATTTTTTT
>HWI-ST942:56:C4CFMACXX:7:1109:21108:438561
CGATAGAGAAAGAGAAAAAAAAAAACGAAGATTTCACATAGTGATTTTTTTTTTTTTTTTTTTTAAAAAAAAAATTTAATTAAATTTATTTCTAACCCTT
>HWI-ST942:56:C4CFMACXX:7:1109:21137:138791
GGTTGACGATCACGAGGCGCTTCGAATAAGAACTTTCCCTTTGTTTCTTTTTTTTTTTTTTTATTTTTTTTATTTTTTTTTTTTTTTTTTTAAATTTATT
>HWI-ST942:56:C4CFMACXX:7:1109:21256:775771
TTAAAATCTTTGTACAGTAGTTTTTTTAAGTATCTGATAGGTTCCCTAGCAACACTTTTTTTCGTTCTATTACTAATTTCATTGGATCCTGAACCCTCGT
>HWI-ST942:56:C4CFMACXX:7:1109:21287:790041
ATCCCATCAAATAAGTGGAAGATTCATTAAACTGTGAAACGTTACCCTGCCATAATGTGATGTGTTTCCAATGCCAATAAAAAGTAACCCATCCAA
>HWI-ST942:56:C4CFMACXX:7:1109:2407:193161
TTCGTTGGCAATATGTCTACGCTGGTTCAAATCCAGCTCGGCCCAATAATTAGCTGTCTACATAACCATTTTTTTTTTTTTCGATAAAATAAAAAGAAG
>HWI-ST942:56:C4CFMACXX:7:1109:2621:706341
GCTAAAGTGGCTCCTAAGAGTACTGTTATTATACCTATCAAAGATATTATATACATTATAGAAGGGATAACGATAAAAAGAGGAAGAAGACGAGCTACAA
>HWI-ST942:56:C4CFMACXX:7:1109:2868:304491
GTCGATACAGAAGAAAAGGTTCTCTATCGATTCAACAAGTGCTGTACTTATGGGAAAGCGATAGAGAAAGAGAAAAAAAAAAACGAAGATTTCACATAGT
>HWI-ST942:56:C4CFMACXX:7:1109:3064:999711
TCATATACAAATTCTCGTTCTCTGAAAATATAGAAAAAGGGAGTCTGTGCACCAATATCTGCCATAAAAGGGCCGAGCCATAACAGATGAGAAGCTATAC
>HWI-ST942:56:C4CFMACXX:7:1109:3295:275311
ATAGCTTCTCATCTGTTATGGCTCGGCCCCTTTTTGACAGATATTGGAGCACAGACTCCCCTTTTCTATATTTTTAGAGAACGAGAATTTGTATGTA
>HWI-ST942:56:C4CFMACXX:7:1109:3330:258921
AAAACTTACAGCGGCTTGCCAAACAAAGGCTAAGAGAAGAAAGAAAAGAGGTATTACGGGCATAACATCTACGATTGGATTCAAAAAGGCGTAGGCCTCT
>HWI-ST942:56:C4CFMACXX:7:1109:3604:260951
GCTAGGGAAAGCTTGAACCCAATTCCTACAGTGATGAATATAAGCGCAATTGAAATTCCAGATCGGAAAGAGCACACGTCTGAACTCCAGTCACATGTCA
>HWI-ST942:56:C4CFMACXX:7:1109:3952:774831	Yes
CATCGGAACGTTTCCGCGGTCGAATCCATTTTGAATTTGATAAAGTTAAATTTAATAAAGATGAATAAAAAGGCTTATATAAACAGTATGCTATAAATAT
>HWI-ST942:56:C4CFMACXX:7:1109:4100:56231
AAAGGCCTATTTATGTAAAATTGAGAGAATAAAAAAAAAAAAAAAAAAAAATTTTTTAATTATATTTTTTTTATTTGATATGAAAAAAAAAAAAAAAATA
>HWI-ST942:56:C4CFMACXX:7:1109:4204:866541
GGCCGATTGATTTTCCAATATGCTAGTTTCAACAATTCTCGTTCTTTACATTTCTTCTTAGCGGCTTTGGCGGGTGTAGGCATTTTGTTTTCTGCCTTT
>HWI-ST942:56:C4CFMACXX:7:1109:4205:803131
CAATGCTAGGTAGAATGAGTATAAGGAACTCAAAAATGATCTTTTCGTCCTATGAACCTTAAGGTGTATCAAGTTTCATGTTTAGATCGGAAGGCACAC
>HWI-ST942:56:C4CFMACXX:7:1109:4552:690271
AAATCATAATTATTTTTTTTTTTATTTCCAGTTTTGTTTTGTTATTTTGAAATGGTTTTTTCAAAAATTTTTTTATTATTTTAGCTTTTTTTTTTT
>HWI-ST942:56:C4CFMACXX:7:1109:4728:387301	Yes
GCTATTTGACCCGGACCTGTTCTAAAAAAGTCGAGGCATTTCGAATTGTTTGTTGACACGGATATCCCTTCCCCCATCAAGAAATAGAACTGACTAATCC
>HWI-ST942:56:C4CFMACXX:7:1109:5114:778481
ATAGCTATTTTTCTAGGTATCATTAATATTCCAAGAATTACTACACAACTTTTTTTTGAATCAACAAAAAAAATTCTTGATAAATATATTTACAAGAAT
>HWI-ST942:56:C4CFMACXX:7:1109:5330:229571
GGTTACCTGATGCCATGGAGGGCCCTACTCCCATTTCGGCTCTTATACATGCTGCTACTATGGTAGCGGCGGGGGTTTTTTTTTTAGCTCTGCCTTTTCC
>HWI-ST942:56:C4CFMACXX:7:1109:5478:197771
AGAAAAATAGAAAATGAGTCAATAAAACATAAATCCAATTTCTAAAAAAAAAATCTTAAAAAAAATTGCCGAACGGCCAGAAAACGAAAAAAATTAAATA
>HWI-ST942:56:C4CFMACXX:7:1109:5552:75581
CCAGATGCATTAACATTTCCCTTTTTTTCATTCTAGTTATTAACATCAGAAAGGGGTGAAAAATTTAGAGATACAATCAACAATCGGGGACTAACCCCCC
>HWI-ST942:56:C4CFMACXX:7:1109:5689:1003181
[truncated: 99,917 more rows]

## Sheet: TS-1
FASTA format	Assigned as rearrangement by BLAST+ analysis
>SRR492388.10000312
AGTTTTTCTATTTTGACTTGCTCCCTCGCTGTGATCGAATAAGAATGGATAAGAGGCTCGTGGGGGTGTCGGGGGGGGGGAGGGGGAGGTTTTTTTTTTGG
>SRR492388.10000712
CTGTGGGATGTCAAAATGCATCGGTAGGGGAGCGTTCCGCCTTAGGGGGAAGCAACCGCGCGAGCGGCGGGGGGGGGAGGGGGAGGGGGGAAGTCGGGGGT
>SRR492388.10001672
TGCATACATCACTGCACTTCCACTTGACACCTATCGTAATGATAAACGGCTCGTCTCTCCCTGTCCTTTTCTTGGATTTTCCAAAATTCTGTCACTCCATC
>SRR492388.100032602
TCCTATATATTAAGATATTTCACTTGTATCTTTATACATTACAATAACCATAATGGCTAAAAAAATAGAAAAAAAAAAATTTTTTCCTTAACCACAGGACC
>SRR492388.100035872
AATTAGGCCAAAAATTAGGATACATTCTGGGAAAATAAAACTTCCATCGAAGAGAAGCAAATGAAAGGCTTTCATAAAAATTCTATTAGAATCGATAACGA
>SRR492388.100036582
TTGTCCATCGACTACGCCTTTCGGCCTGATCTTAGGCCCTGACTCACCCTCCGTGGACGAACCTTGCGGAGGAACCCTTGGGTTTTCGGGGCATTGGATTC
>SRR492388.100044182
TGTGCTTCTTTAGGAGTTAAACTTCCATTTGTCCATATTTCTAGAAAAGAATCTCATGGTTTTCATTTCCATTCCCATTAAGATTAATACTTTGGTTTGCT
>SRR492388.100045502
TTACTCACGTCTCGAATGAATTCAAGGACAAATTCAAAGAAATTTTGGCCGTCAGTTGGAATTGTTTGTGGATTTTTTAACTCTAGAACTCCGGGACACAA
>SRR492388.100047292
ATCCTTGTTTACCAACCACACATTGTCTAACCAAATCCAATTCTCTCTCGATATTTTCCTAAAAAAATCCGATTCGTGCGGATTCTAGATCGGAAGAGCAC
>SRR492388.100049412
AGTTAATAGTCATTAATAAAGAAAAATTTTTCTTCCATTACAAATTTCTACAAAATTGATTAGAATCTGATCTAACAACAGGGAATTTTCGGGAAATGCAA
>SRR492388.100051272
AGTTCGATCCTGGCTCAGGATGAACGCTGGCGGCATGCTTAACACATGCAAGTCGGACGGGAAGTGGTGTTTCCCGTGGCGGGGGGGGGGGGGAAACGGGG
>SRR492388.100053432
AAGATAGTTATTAAATCGTTAGCACCACATAAAAACATTCCTCCTAGAGTAGCTGTTAATATGAATAACAGAAACTCTGTTATAGCCAAGATCGGAAGAGC
>SRR492388.100054412
AAATACCCAAGAAGCATTAGCTCTCCCTGAAAAGGAGGTGATCCAGCCGCACCTTCCAGTACGGCTACCTTGTTACGACCTTCCTCCCGTCACCAACCCCC
>SRR492388.100057652
CAGCCCAGGCACAACGACGCAATTATCAGGGGCGCGCTCTACCACTGAGCTAATAGCCCGTCGTTCACGCGTCCCGACGGGCGCCGCCCGCCACCCTCACC
>SRR492388.100068162
TTATTTACAACGGAATGGTATACAAAGTCAACAGATCGTAATGAATACAAAATAAGATTTATGGCTAAAAAAACCATTGAAGCTATGTCTAGATTTGGTGC
>SRR492388.10006832
ATAAGTAAATGCCTCTTTTTCTCCGGAAGTTGTCGGAATGACTCGTAATAAGATATCGGCTAAAAATTTAAAGGGTTTATTAATAAAAATTTCATTTTTAC
>SRR492388.100074182
TAACCGCAAGGAGGGGGGTGCCGAAGGCAGGGCTAGTGACTGGAGTGAAGTCGTAACAAGGTAGCCGTACTGGAAGGGGGGGCGGGGGGCACCCCCTTTTT
>SRR492388.100090312
GCTGTCAAGAACGTAGAGGAGGTAGGATGGTCAGTTGGTCAGATCTAGTATGGATCGTACATGGACGGGAGGTGGAGGCGGGGGGTCTCCTCGGGGTCTCT
>SRR492388.100102362
CAGAATATCGAACCATGAACGAAGAAAGGCATGCGAGAAAAGCATATTGGCTAGTGATTGTGAGGGTCCCAATTTTGACTGGGGGGGGGACCCAAAGGCCC
>SRR492388.100102822
GTTTTGGGCTTTGGCGGTATTTATCATGCACTTCTGGGACCCGAAACTCTTGAAGAATCTTTTCCCTTTTTCGGTTATGTATGGAAAGTTAGAAATAAAAT
>SRR492388.100106302
AGCGAAATTCCTTGTCGGGTAAGTTCCGACCCGCACGAAAGGCGTAACGATCTGGGCACTGTCTCGGAGAGAGGCTCCGGGGACAAAACATGTTTGTGGAG
>SRR492388.100106562
AGGCCCTGACTCACCCTCCGTGGACGAACCTTGCGGAGGAACCCTTGGGTTTTCGGGGCATTGGATTCTCACCAATGTTTGCGTTACTCAAGCCGACATTC
>SRR492388.100107782
AAGGGTCAAAACCCTCCACGCCCCACGCCGGGTTTACGGGTTGTACCTTTCCGGTTAGTCCATAAGGGTCGGATACCCATATTCCAGGACCATATAATCCT
>SRR492388.100113632
GCTGCATACATCACTGCACTTCCACTTGACACCTATCGTAATGATAAACGGCTCCGCTCGCCCGGTCCCTCCCTTTTATTCTCAAAACATATGTCCCCCCC
>SRR492388.100115722
TCCTTCTATTTCGCCAAGTAAAGCTCTTCGCATCGCAATGCCTATTGTGTCGGCTTTGCCTTTCCTAAGATGGGGCCAAATTAAATGTACATAATAAAAAC
>SRR492388.10011842
AGCTGTGGGATGTCAAAATGCATCGGTAGGGGAGCGTTCCGCCTTAGGGGGAAGCAACCGCGCGAGCGGCGGGGGGCGGAGGGGGAGAGAGAAGGTGGGGG
>SRR492388.100120512
GATATCTTCGTATCCGAGAATCAACAAATTCAACTCCACATTGTTCACAAAACTTTGGGTCTTCTTTTTCATCTCAGATCGGAAGAGCACACGTCTGAACT
>SRR492388.100125372
CAGCTGGAAACGGCTGCTAATACCCCGTAGGCTGAGGAGCAAAAGGAGGAATCCGCCCGAGGAGGGGCTCCCGGCTGGGTAGGTTGTTGGGGGGGGGAAAG
>SRR492388.100125882
CAGCAGCAATACTACTGGAAAGGACGGTTTCAATATTGCCCATACGTAATCCTTTGTATAGACGTTGAGGCGGGCGGAAACTAAGATAGCAGAGGCACCCT
>SRR492388.100130242
AAAAAAAAATCTAAAAATCGTCTAGTACGGAATCTTTTCAAGAAGTGATTGGTCTAACATAAAAAAAAAAAAGAGGGTTAAGTTTCGTTTTTTTTTTACTT
>SRR492388.100130612
CGAAATTATTGTACGTCAAATAACATCAAAAGTTTTGGTTTCCGAAGAGGGAATGTCTAATGTTTTTTTACCTGGAGAACTTATTGGATTATTACGAGCAG
>SRR492388.100133452
ATGGGATTTCGGTCTATACCGGCACCATAATATCAGATTGGGGAGGCAGGTTAGAATTAGAGATTGATAAAAAAGCAAGAATATGGGCAGAACGGAAGAGC
>SRR492388.100137512
AAGTTCTTGTATTTGTATATGTAACTTCCGTCCCCCCGCTTTCAAAATTAGAATTTTAATATTGTCGACTAGAACGATCTTATCGATTCCATTTGAAAACG
>SRR492388.100139082
AATACCCCGTAGGCTGAGGAGCAAAAGGAGGAATCCGCCCGAGGAGGGGCTCGCGCCCGATTAGCTTGGTGGGGGGGCAATAAGCTACCAAGGGGGTGAGA
>SRR492388.100140272
ATTCCTCCCGGAACAAAAGGGTCAAAACCCTCCACGCCCCACGCCGGGTTTACGGGTTGTACCTTTCCGGTTAGTCCATAAGGGTCGGATACCCATCTTCC
>SRR492388.100144312
TCCTATAGAATCTGACCCATTTTCTCATTGAGCGAAGGGGTACGAAATAAATTCAATCAGATTTATTTTTGATCAAAAAAAAAAAAAAAAACTACTATGAA
>SRR492388.10014792
CTTAAATGTATTACCGCATCCCCAAGGGTTAGGCCCACTTTTTACGGGTCAGTGGAATCTTTATGCTCAAAACCCCGACTCGAGTAGTCATTGATTTGGTA
>SRR492388.100163702
TGTAATTAAGAAGTTCTTGTATTTGTATATGTAACTTCCGTCCCCCCGCTTTCAAAATTAGAATTTTAATATTGTCGACTAGAACGATCTTATCGATTCCA
>SRR492388.10017382
AAGGGGTTCAATGCAGACTTTGATGGGGATCAAATGGCTGTTCATGTGCCTTTATCTTTAGAGGCTCAAGCAGAGGCTCCCTTCTTTTTTTTTTTTTTTTT
>SRR492388.10018822
GTTAATAGTCATTAATAAAGAAAAATTTTTCTTCCATTACAAATTTCTACAAAATTGATTAGAATCTGATCTAACAACAGGGAATTTTCGGGAAATGCAAA
>SRR492388.100196112
ACAATAGACGCATAGTGGTTAGTAGCTCATTTGGGAACTAGAAATTGAATTGACTTCAAATTTACTTAACGGGGGATTTTTTTCTTTTTTAATATTAGATC
>SRR492388.100203702
TTCCATTCTTACAGGTAAATGCTCAACACCCACGTAAGCTTAAAAAGTTTATCATGATTAAGTGCTTTCTGGGTCGAGATCGGAAGAGCACACGTCTGAAC
>SRR492388.10021362
GGTAACTCATATTACTGGAGGAAACTTTGCACAGAGTTCCATTACTATTAATGGGTGGAATTGCCACAACATGGGCGTTCTTCTTAGCAAGAATTATTGCA
>SRR492388.100217542
TGATAAACTATTCATACCAAACGGGTTATATCCATTGATAAGTTGTGAAGAGTTTAACCATAGATAATCTCTTAACCATCCCATCAAATAAGTGGAAGATT
>SRR492388.10022362
GTCAAAATGCATCGGTAGGGGAGCGTTCCGCCTTAGGGGGAAGCAACCGCGCGAGCGGCGGTGGACGAAGGGGGAGGGGGGATGGCGGCGTTGGGGAACGC
>SRR492388.100225382
CACCATTATACCCACAATGATTGGCCATACGATCGCTATTCATAATGGAAGGGAACACTTACCCGTTTATATAAAGATCTTTTTGGAAGGACAAAAATTAG
>SRR492388.100227452
GTTAAAATAAGGTCCGCCTGTCTAGGACTCGATCTTGGTACTAACCCATAACGATCAAAGTCAAGATCGGAAGAGCACACGTCTGAACTCCAGTCACTAGC
>SRR492388.100227842
TTCGAGCTTTTCCTGGGAGTATAGCATGGGTTACTTCAGCGCCGTAGCGCCTGGTACTCGAACATTGGCTCCGGGGGTTTTTTTTTCCCCCTCTTTCCCCG
>SRR492388.100233462
TGAGAGCCCTCACAGCCCAGGCACAACGACGCAATTATCAGGGGCGCGCTCTACCACTGAGCTAATAGCCCGTCGTAACAATGAATCCCGGACGCGAAACC
>SRR492388.100240362
ACTAGACAAACAAAAAAAAGTTCATTTTCCTCCCTTGCTTGCATATGTATAGATAATTCAAATATAGATAGATGCAGATCTATAGAGAGTCTTCCCTCTTT
>SRR492388.10024262
ATCTGGGTTTTACTCACGTCTCGAATGAATTCAAGGACAAATTCAAAGAAATTTTGGCCGTCAGTTGGAATTGTTTGAGGATTTCGCAGACATCTAGCACT
>SRR492388.100245682
CTCAGCTGCATACATCACTGCACTTCCACTTGACACCTATCGTAATGATAAACGGCTCGTCTCGCCGGGACCCTCTTTTTGATTTTCAAAACTTTTGGTCC
>SRR492388.100247602
TCAGATAACATTTTTTTTTGCTTTCCTGATCGGTACAATCTTATTTTGATGTCGAAAAAAAAAAAAAAATTCAATTTTGGGCCAAGGAAAAAAAAATAAAG
>SRR492388.10024792
TCTTTGAGAAATCAAAAAAAGCACGGATACGGATGCTTTTTTTATCACCAAGTCAAGATGAATATTATATGATAGCGGCAGGGGAATATTTTTGTCTTTAT
>SRR492388.100249212
TTCTCAAAACTTCTGTCACTCCATCCCCGCAGGGGCGGAGAACCCGTTGCTGTCTCGGCTGTGCTACCGGAGGGTCTGGGGGAGGCGGGAAAGGGGAGGCC
>SRR492388.100256062
GCCCGGGCGCGCTTGCGTAACGTAGAAACGGAAGCGGATAAGATTCGCGTGAATGGATAATCTGGAATCGAACGAGGAAAAATGAAATTGATTAAATTAAC
>SRR492388.100265152
GCAAGGAGGGGGGTGCCGAAGGCAGGGCTAGTGACTGGAGTGAAGTCGTAACAAGGTAGCCGTACTGGAAGGGGGGGGTGGGGCGCCCCCCTTTTTTGGGG
>SRR492388.100266462
GTTTGCACAAATACCTCGACGAGTGCCGCTCGTTAATACATAGAGTCCAATAAGCATATCTTGAGTCGGTACCGAAATGGGATCTCCAATAGCTGGAGATA
>SRR492388.100268302
CAACATTCTTATGCACCCATTTCACATGTTAGGTGTAGCTGGTGTATTCGGCGGCTCCCCTTTTTGTGCTATGCATGGTTTCTTTGTTACTTCTTGTTTTT
>SRR492388.100270112
TCAAAGATTTGATCTTTTCGAACTCTGTCTGTAACTCACTATAGGCTCGGGGAACAAAAAGAAGATGTGGAAGAAAGATATATTCAGCAAAAAGAAAAAGG
>SRR492388.10028572
AAGGAATTGATCGTGATTTTGAACCTGTTCTTTCCATGACTCCTCTTAACTAAAGTAGTAGGTAAAACAAATAGGTTCATATTAAAAAGTCTTCTTTGTTT
>SRR492388.100288802
TCATTAATAAAGAAAAATTTTTCTTCCATTACAAATTTCTACAAAATTGATTAGAATCTGATCTAACAACAGGGAATTTTCGGGAAATGCAAAAAGATGGA
>SRR492388.100296562
GAGTATTTCCTCTAGATGGACGAAGATTTTCTTTGAAAAGTAGTTTTGTCCCATCGGCTAGAGCTTGAAGAAATCCCCACAGGTCCGCGTGTTTAGGGCCA
>SRR492388.100299002
TCAAGAACGTAGAGGAGGTAGGATGGTCAGTTGGTCAGATCTAGTATGGATCGTACATGGGCGGGAGTTGGGGTCGGGGGGGCTCCCCGGGGTTCCTCCTC
>SRR492388.100302782
TTTTCCCTTTTTCGGTTATGTATGGAAAGATAGAAATAAAATGACCACCATTTTGGGTATTCACTTAATTTTGTTAGGTGTAGGTGCCTTTCTTCTAGTAT
>SRR492388.100324982
CGTCAACCAATTCTGTGCTTCAATATAATTACCAGGAGTAAGCGTTATAGCCTGTTTCCAATACTCAGCGGCTTGGACGAAACAAAGCCGCGCCCTTTTCC
>SRR492388.100326972
CTGTTGTCCATCGACTACGCCTTTCGGCCTGATCTTAGGCCCTGACTCACCCTCCGTGGACGAACCTTGCGGAGGAACCCTTGGGCTTTCGGCGCATTGGT
>SRR492388.1003272
GCATCGTCCTTTGTAACGATCAAGGCTGGTAAGCCCATCGGTCCACACAGTTGGCCATGTACCAGTAGAAGCTTCAGCAGCTAACACATACCCCCCTTTTT
>SRR492388.100337952
TAGCCCTTGGTAAATTTACCAAAGACGAAAAAGATTTATTTGATATTATGGATGACTGGGTACGGAGGGACCGCATCGGTTTTTTAGGGTTGTCGTGTGTA
>SRR492388.100343932
TTACCCATTGAGTGACTTTGGCACTGGATGGACGTTACCAAAATTGGTACTATCGGGTCGGGTGAATTCAATAATAAACACCCGGGCGCCTTTATGGCCTC
>SRR492388.100344912
GGGCGAACGACGGGAATTGAACCCGCGATGGTGAATTCACAATCCACTGCCTTAATCCACTTGGCTACATCCGCCCCTACGCTACTATCTATTCTTTTTTT
>SRR492388.100348932
CTCAAAACTTCTGTCACTCCATCCCCGCAGGGGCGGAGAACCCGTTGCTGTCTCGGCTGGGCTACCGGAGGGTCTGGGGGAGGCGGAAAAAGGGAGCACCC
>SRR492388.100354542
TTCGGCATAAGAAAAAAAAGGAAAGACATCATAATGAGATCCTAAAAAAGGGGATATGGCGGAATTGGGAGACGCTAAAGACTTAATTTGATATAAACCTG
>SRR492388.100355062
GATGTAAAAAAGATATTAGACATTCTAGAAAAAAAATAGAAAAAAAATAGAAAAAACATTTCAAAAAAAATTGACTAAGACTAAAAAGTCAATTTGAAATT
>SRR492388.10036962
AAAATCAACTACAACTAGATGTATCATAATCCCCTTGTTAGATTTATTATTCTTTTTGTCTTAATATCTTATAATAGTTAATAGTCATTAATAAAGAAAAA
>SRR492388.100381572
GATTTAGATCGGGAGAATCGTACGGTTTTATGAAACCATGTGCTATGGCTCCCAACCGTAGACAATCCTAATTTCCATAAGGGAAGTTTTCAATTTAATCC
>SRR492388.100386592
TAGGAGGATTTGAAAGGCATTATGGCATTAAGATTTCCAAGGTTTAGCCAAGGCTTAGCTCAGGACCCCACTACTCGTCGTATTAGATCGGAAGAGCACAC
>SRR492388.10039902
AACCGGGAACAATTTACTTACGATACTTAGTTGACATTCATAAAAAGTATCTAATGAATTATGAGTTCAATACATCCTGTTTAGAGATCGGAAGAGCACAC
>SRR492388.100402222
AAAATTAGTAAAAGCGAATTTAATTCCACTTTTTTTTTAATTTCAAATCTTTTTTTATCTAAAAATCCATCGGATGAGTCTTTTTAATTTTAACAAAAAAA
>SRR492388.100413182
CTTTCCCTAGTACGAGAGGACCGGGAAGGACGCACCTCTGGTGTACCAGTTATCGTGCCCACGGTAAACGCTGGGTAGCCAAGTGCGGAGCGGATAAACGC
>SRR492388.100416652
TTTCGGTTATGTATGGAAAGATAGAAATAAAATGACCACCATTTTGGGTATTCACTTAATTTTGTTAGGTGTAGGTGCCTTTCTTCTAGTATTCAAGGCTC
>SRR492388.100428022
CGCAAGGAGGGGGGTGCCGAAGGCAGGGCTAGTGACTGGAGTGAAGTCGTAACAAGGTAGCCGTACTGGAAGGGGCGGGCGGGGGACCCCCCTTTTCTGGG
>SRR492388.100429482
TGGATAGATACCTTTGGCAGCTAATCCTCTTGATAGTACGGTAGGCGCCTCTAAATGTGCAAATGAGGTGGCAGGGGCGGGGGCGGTGCAATTCACTGCAG
>SRR492388.100429712
TTTCGTGGTTCAAAAATGCTGAATCTCGTCTGAATCATCATTTGTCAGGACTATTCGGGGTAAGCTCATTGGCTTTGACCAGGAATTTTGTCCATTTTGCT
>SRR492388.100431922
GTGTGTACAAGGCCCGGGAACGAATTCACCGCCGTATGGCTGACCGGCGATTACTAGCGATTCCGGCTTTATGCAGGCGAGGTGGCGCCCGGAAACCCAAC
>SRR492388.100452082
ATCCCGAAAACGTCCGGGTCGAAATATGGCTTTCAAATTAAGTTCCGAATTAGTGGATGCTGGCACAGGGAGGGGCGAGGGCATACGCCAAAAGGGAAGGA
>SRR492388.100454032
AAAAGACCCATCCCCAAGTTCCATAGCTTTGAGTCCGCTATCGCTATCCCGAGCATGATTTTCCTACCCCCCCGGAGGGAAAGGGCCTTACCTTTTTGGGC
>SRR492388.100465152
CACTCCCTTTGGCAGCATCCACTAATTCGGAACTTAATTTGAAAGCCATATTTCGACCCGGACGTTTTCGGGATGCCCCTAATAACCAACGAATGGCAAGT
>SRR492388.100466312
AAGGACGGTTTCAATATTGCCCATACGTAATCCTTTGTATAGACGTTGAGGCGGGCGCAAACTAAGAAGGAATAAGGCCCCTAAAATACCCAAACGCCCCG
>SRR492388.100471882
GGTTCGAGTCCTCTTCAAGGCATAATATTGAAATGGAATAAGTTCGGCAGCGGATCCCGAAATATTTGGGGTTTTCTCTATCTTAGTAATGGGGGGGGGGG
>SRR492388.100474452
ACTTCATTTTATTAGTCCGATCACGTAAACCATAAAAAAATTTTGATAATCTAATATCAATCTAAATACTCCCTGCAAGATCGGAAGAGCACACGTCTGAA
>SRR492388.10047852
GGTCCTGACACAAGGTTAGAATTCTAGCTCTTCCAGAGTGGTATCTCACTGATGGCTCCCGGCCCCCCCGACGGGGGGCTCCGTTCAGCCCCTTCTCTTTT
>SRR492388.100496182
CGAATCCCTCCTCGCCCACAACCGGCCCAAAAGGGAAGGACCTTTCCCTCCGGGGGGGTAGGAAAATCATGCTCGGGATAGCGATAGCGGGCTCAAAGCTA
>SRR492388.100505092
AAACCGGTGGTTTCTTGGTCACGACCAGCTAAAGCTAAAGTTCCATTAAAGAGCGTTTCCACGTGGTAGAACCTCCTCAGGGAATATAAGGTTTTCATGAG
>SRR492388.100509212
ATCCTAAGTCAAAGGGTCGAGAAACTCAAGGCCACTATTCTTGAACAACTTGGATTGGAGCCGGGCTTTCCTTTCGCACTTTATACGGGTATGAAATGAAA
>SRR492388.100510102
AAACGATGGATACTAGGCGCTGTGCGTATCGACCCGTGCAGTGCTGTAGCTAACGCGTTAAGTATCCCGCCTGGGGGGTACGTTCGAGATCGGAAGAGCAC
>SRR492388.100511272
AGATTAGGATCCTCTTTTCAAGGAAAACAATTAAAAAAATCTTATAATTTACAATCAATTCATTCAATATTTCCCTTTTTAGAAGACAAATTAGGACATTT
>SRR492388.100513512
GGGGGGCTTTTTACCAGAGGTTTAGATTGTATCAATCTACCCTTGTGTGATTCCTGTTGAATCATATACTGCGGGGCGCAGGGCGGACGATTTCAAAGCGG
>SRR492388.100520702
TGCCTAAATAGTAGACACAGGTAATAAATAAGAGAATACTAAAGATTCGAGCCATAGAATTTCTCAATTCTGACACAAGGAACTTATACTTATTAGATCTA
>SRR492388.100523502
CAAACAAGATGCCCAAATAAGAACATCCATGCCCAGACTGATAAACTATTCATACCAAACGGGTTATATCCATTGATAAGTTGTGAAGAGTTTAACCATAG
>SRR492388.100531732
CTCTTGAATTCTCAAAACTTCTGTCACTCCATCCCCGCAGGGGCGGAGAACCCGTTGCTGTCTCGGCTGTGCTACCGGAGGGCCCGGGGGAGTTGGGAAGG
>SRR492388.100535382
CATAAATCCTGTAGCCCAAACAAGATGCCCAAATAAGAACATCCATGCCCAGACTGATAAACTATTCATACCAAACGGGTTATATCCATTGATAAGTTGTG
>SRR492388.100540332
CATGTCTGTGAAGATGCGGACTACCTGCACCTGGACAGAAAGACCCTATGAAGCTTCACTGTTCCCTGGGATTGGCTTTGGGCTTTTCCTGCGCAGCTTAG
>SRR492388.100553452
ATAGTTGAACCCCATTATAAGTACATTTAACATGCATTTCACGTAGATCGGAAGAGCACACGTCTGAACTCCAGTCACTAGCTTATCTCGTTCTCTGCTCT
>SRR492388.100561892
GCCATCCTAAGGTGCTGCTAAATGGAAAGATCTTATCAACGTCCATGAATGAAAAATCATAGATCGAACTGCCGAATCGGAAAAATTGGGGGCTATCATAT
>SRR492388.100563992
GGGAGTATAGCATGGGTTACTTCAGCGCCGTAGCGCCTGGTACTCGAACATTGGCTCCGGGGGTTTTTTCTTCCCCCTCTTTACCTCAAAAAAAAGGGGCC
>SRR492388.100566962
CTTGACCAATATACCTTGCAGCTCGTAGGGTTTGTTGACCATAATTCATGAACTCGGTTATCATAGGAAGCATATTGTAAAGATCGGAAGAGCACACGTCT
>SRR492388.100572002
GGTCTGTTAGGATGCCTCAGCTGCATACATCACTGCACTTCCACTTGACACCTATCGTAATGATAAACGGCTCCTCTCCCCCGGGACCTTCCTTTAATTTT
>SRR492388.100577122
TTTTCCTGGGAGTATAGCATGGGTTACTTCAGCGCCGTAGCGCCTGGTACTCGAACATTGGCTCCGGGGCTTTTTTCTTCCCCCTCTTTCCCTTCAAAAAC
>SRR492388.100586522
GTGCTAAAGAGCGTGGAGGTTCGAGTCCTCTTCAAGGCATAATATTGAAATGGAATAAGTTCGGCAGCGGATCGCCGAAAATTTGGGGTCTTTTCTATATT
>SRR492388.100590692
GGAATTGGAATGTAATAATATCGATTCATAATGGATTCATATCGATACAGAAGAAAAGGTTCTCTATCGATTCAACAAGTGCTGTACTTATGGGAAAGCGA
>SRR492388.100602022
AAACTTCTGTCACTCCATCCCCGCAGGGGCGGAGAACCCGTTGCTGTCTCGGCTGGGCTACCGGAGGGCCTGGGGGAGGACGGAAAGGGGGGGAACCATCT
>SRR492388.100603592
GCTGTCAAGAACGTAGAGGAGGTAGGATGGTCAGTTGGTCAGATCTAGTATGGATCGTACATGGACGGGAGTTGGAGTCGGGGGGCCCTCCCGGGGGCCCC
>SRR492388.10061262
AACCCGTAAACCCGGCGTGGGGCGTGGAGGGGTTTGACCCTTTTGTTCCGGGAGGAATATCCTCTCCTTATATTGCAGCAGGGACGATGGGTCTATTATCG
>SRR492388.100618842
TGAGGAAAAGAATTGCGATAGCTAAATGATGATGTGCCATATCGGTTAGCCATAAACTTTGAGTTTGTGGGTGGGATCCCCCCACGAGGGGTTGGCAGGCA
>SRR492388.100622362
TTTTTCTGCCATTTGAACTCATTTCAATAATTCTTTTAGTTGCTTTGATAGGTGCAATTTCTGTGGCTCCCCACCAAAAAAAATTTTTAATTATTTAAGAA
>SRR492388.100623452
TAGGTCCTGACACAAGGTTAGAATTCTAGCTCTTCCAGAGTGGTATCTCACTGATGGCTCCCGCCCCCCCCCCAGGGGGGGCGCTTCCCCCTCCCCCCCCG
>SRR492388.100626332
CGGTGTGTACAAGGCCCGGGAACGAATTCACCGCCGTATGGCTGACCGGCGATTACTAGCGATTCCGGCTTCAAGCAGGCGGGGTGCAGCCCGCGCTCCCG
>SRR492388.100640932
AGCTATATCAGAGTAATTATGCTGGAATTGAGTCGTATAGCTTCTCATCTGTTATGGCTCCCCCCCCTTTTTGCAGGGGTTGGTGGTCACACCCCCCCTTT
>SRR492388.100641432
ACCCATGCTTTAGCACCTGGTGTAACAGCCCCTGGTGAAACAGCGAGCACCAGTTTGACTTGGGGGGCGGGGAGTTAGTAGCAGTGGGGGGGCAACTTGGT
>SRR492388.100645642
TTCTATTTCGCCAAGTAAAGCTCTTCGCATCGCAATGCCTATTGTGTCGGCTTGGCCTTTCCTTAGAGGGGACAGAATAAAAGGTCCACAAGTAAGACGCT
>SRR492388.100649612
TGCTAAATGGAAAGATCTTATCAACGTCCATGAATGAAAAATCATAGATCGAACTGCCGAATCGGAAAAATTGGGTGCTATCATATAGCTTTGTATCGGCT
>SRR492388.100670982
CGCTTCTGAATCTCGGTTAATTGAATCTCCTGCCCCAGGTATTATTTCGAGACGTTCTGTATATGAGCCTCTTCAAACAGGACTTATTGCTATTGATTCCA
>SRR492388.100681712
ATCCTAAGGTGCTGCTAAATGGAAAGATCTTATCAACGTCCATGAATGAAAAATCATAGATCGAACTGCCGAATCGGAAAAATTGGGTGCTATCATATAGC
>SRR492388.100684642
CATAGATAATCTCTTAACCATCCCATCAAATAAGTGGAAGATTCATTAAACTGTGAAACGTTACCCTGCCATAATGTGATGTGTTTCCAATGCCAATAAAA
>SRR492388.100688722
CTGTGGGTTATCAACCCACCCTTAGTACCGAAATGGGTACTTTACAAGAAAGAATTACTTCTACGAAAAAGGGGTCCATAACCTCTATTCAAGCAGTTTAT
>SRR492388.100690502
AAATTTGATTGTTACGTCTGTGTCTATTATAAAAAAAAAAAAGAAAAGAATCGTCGAAAAGCATAACTAGTTTTTTCGAAACTATATACTCTCAGATCGAA
>SRR492388.10069122
TTCTAAGTAATGGGGAAAAGGACCGAAACATGCCACTGAAAGACTCTACTGAGACAAAGATGGGCTGTCAAGAACGTAGAGGAGGTAGGATGGTCAGTTGG
>SRR492388.100697852
ACTTCCATACCAAGGTTAGCACGGTTAATAATATCAGCCCAAGTATTAATAACACGTCCTTGACTATCAACTACTGATTGGTTGAAATTGAAACCATTTAG
>SRR492388.100699862
AATTGAGTTTCTTCTCCTGGAACGGGCTCGATGTGGTAGCATCGTCCTTTGTAACGATCAAGGCTGGTAAGCCCCTTCGGCCACACAGTTGGGCCTGTACC
>SRR492388.100703632
TAGCCTAGCGCATCGAACGAAATTAATTGGATTTATACATGTACTCAGCAAGTTGACATACACCCAAGATATTTTATCTTGACATGTGATGAAGAGATACG
>SRR492388.100717702
CGCGTTAGCTACAGCACTGCACGGGTCGATACGCACAGCGCCTAGTATCCATCGTTTACGGCTAAGACCACAAGGGGATCCAATACCATTCTCCTCCCCCC
>SRR492388.100719652
TTCACAGACATGTCTATTTCACCGAGCCTCTCTCCGAGACAGTGCCCAGATCGTTACGCCTTTCGTGCGGGTCGGAACTTACCCGACAAGGAATTTCGCTA
>SRR492388.100738022
GGGGCAGAGGGAATTTCCGGTGGAGCGGTGAAATGCGTAGAGATCGGAAAGAACACCAACGGCGAAAGCACTCTGCTGGGCCGACACTGACACTGAGAGAC
>SRR492388.100739732
GAAATGTTCCAAATGCTCCTGGAAATTCTTGCTCCCATTGGACCATTTGTATCTATATGCATTAGGATCCCGATTTATTGATCTCTCGGTAGATCGGAAGA
>SRR492388.100747622
AAGCTCAGAATTGTGGGTGTATTCAATACTCCCAAATAAAAAAAAAAGGCGATTGGCCTATGGTCGATTCAGAAATTCAAATTGATAGGCGAGATCGGAAG
>SRR492388.100760892
CATTCAATGTGTATTCCTGAATAATCTCATTTTTCAATTATTCAACCATTTCATTTAACCAATTCAATGGTAGGCCGAATTGGCCACCATTAATAGGTTCG
>SRR492388.100766572
ATGTTAAATACTATTGGATGGGTTACTTTTTATTGGCATTGGAAACACATCACATTATGGCAGGGGGAAGGTTTTCCGTTTTAATTAAATTTCCACTTTTT
>SRR492388.100773482
ACAGCCCAGGCACAACGACGCAATTATCAGGGGCGCGCTCTACCACTGAGCTAATAGCCCGTCGTGGGGGGCCCCCGCGCGGGGGCCCCGCCTCCCCACCC
>SRR492388.100773682
AAGGAGGGGGGTGCCGAAGGCAGGGCTAGTGACTGGAGTGAAGTCGTAACAAGGTAGCCGTACTGGAAGGGGGGGGCGGGGGTCCCCTCCTTTTCGGGGGG
>SRR492388.100775402
AAGGAGGGGGGTGCCGAAGGCAGGGCTAGTGACTGGAGTGAAGTCGTAACAAGGTAGCCGTACTGGAAGGGGGGGGTGGGGGGACCCCCCTTTTTGGGGGG
>SRR492388.100780192
ATGCCCTTAGGCACGGCCATACATAATATAGAAATCACACTTGGAAGGGGTGGACAATTAGCTAGAGCAGCGGGGGGTGTCGCCAAACCTCAAGCCGAAGG
>SRR492388.100791942
TGGGTGTGAAGCTGTGTCAAACCTAAATACCCAAGAAGCATTAGCTCTCCCTGAAAAGGAGGTGATCCAGCCGCACCTTCCAGTACGGCTACATTGTTACG
>SRR492388.100796072
AATACTATTGGATGGGTTACTTTTTATTGGCATTGGAAACACATCACATTATGGCAGGGGGAAGGTTTTCAAATTTAATAAAATTTCCCCTTTTTTTTTGG
>SRR492388.100798652
TCCTCCAATACGAAAAAAATTATGCATCATTCTCATACCGGTGGCAGCTTCGAATAGATCATATACAAATTCTCGTTCTCTGAAAATATAGAAAAAGGGAG
>SRR492388.100806892
CAAAACAGGAATACCACTTGATATTAGTAAAAATGCCCAGAAAATATCATATTCGTAAAGCAGAAACATAGACGAACTCCTATGAATAGATCGGAAGAGCC
>SRR492388.100813992	Yes
GTTATTGGGGAAAAATCAATATACTTTTAATGTCGAATCAGGATCAACTAGGACAGAAATAAAGCATTGGGTCTAGGAGCGAATGGGATTAGATACCCCAG
>SRR492388.100817932
ATGAGTCCGCTTTTATGTTAGTTCGTACTATACAATTCCTTTGTTTGTGAGAAAATTTTCTCACAAAAGAAAAGGTAAAGGAAATAAAAAGAGTTAGAGAA
>SRR492388.100821112
GTCGGGTAAGTTCCGACCCGCACGAAAGGCGTAACGATCTGGGCACTGTCTCGGAGAGAGGCTCGGGGGGATCGAACAGGACGTGCAGTTGAGGGCTGCAC
>SRR492388.100830452
CTCGGAAACAAAAAGGGGAGTTGATGTATTGAATCCGCCGGGACTGACGGGGCTCGAACCCGCAGCTTCCCCCTTTTCAGGGCGGGGCCCTGGTCCAATGG
>SRR492388.100838772
TGTGTACAAGGCCCGGGAACGAATTCACCGCCGTATGGCTGACCGGCGATTACTAGCGATTCCGGCTTCCTGCAGGGGGAGTGCCGGCCGCCAACCCGACA
>SRR492388.100847252
TGAAATAGACATGTCTGTGAAGATGCGGACTACCTGCACCTGGACAGAAAGACCCTATGAAGCTTCACTGTTCCCTGGGATTGGCTTTGGGCTTTTCCTGC
>SRR492388.100861022
TTCTATGAACCAAGATAGCTATTGTTGTTGATCATTCAGAAGCCCGTTCGTAAAAAATTTCCTTTAGTTTTATTCATTCTCTCTTAAGATCGGAAGAGCAC
>SRR492388.100862812
CTATTCTTATTACTATCCCTAACAAAAAAGGTGTCATCCGATATGAAATTGCGAATGTCCTTGGAGCTAACTAAAAGATCAACAGATCGGAAGAGCACACG
>SRR492388.100870892
ACTTGCTTCGGATATAAAACTTTGAGTATTCAAAGATGCTCGAGTTATTCCTAATAAAACGGCTCCCTAAAAAAATTCTTCTTCTTAAGCACGCCCCCCTT
>SRR492388.100890612
AAGGAATTAGAGAAGCTCCAATGGAAAAATATTGGAAAGGGAAAATGCTTCGAAGATGAACCTCTTCCCATGCGATAGTCAAAAATTCTTGGCGGTATCGA
>SRR492388.100902512
GGAATCTTTTCAAGAAGTGATTGGTCTAACATAAAAAAAAAAAAGGGGGTTAAGTTTCGTTTTTTTTTTATTTTCCTTGATAGATTGCCTCATCTCATTGT
>SRR492388.100903052
CGTCTAGTACGGAATCTTTTCAAGAAGTGATTGGTCTAACATAAAAAAAAAAAAGAGGGTTAAGTTTCGTTTTTTTTTTACTTTCCTTGATAGATTGCCTC
>SRR492388.100920412
ACCAGAATATCGAACCATGAACGAAGAAAGGCATGCGAGAAAAGCATATTGGCTAATGATTGTGAGGGTCCCAATCTTTAATGGGGGGGGAACCAAAGGGC
>SRR492388.100920962
CCTGTTGTCCATCGACTACGCCTTTCGGCCTGATCTTAGGCCCTGACTCACCCTCCGTGGACGAACCCTGCGGAGGAACCCTTGGGTTTTCGGGGCATTGG
>SRR492388.100936452
TATTTCGAGACGTTCTGTATATGAGCCTCTTCAAACAGGACTTATTGCTATTGATTCCATGATCCCTATAGGACGCGGCCAGCGAGAATTAATTATTGGTG
>SRR492388.10094282
GAATATATAACCTACAGAAAAGTGAGCTAATCCAACCAATCTTGCTTGCACGATTGAAAGAGCTACTGGTTTATCTTTCCAGCGAATCACATTTGCCAAAG
>SRR492388.100959542
TCCGCATCTTCACAGACATGTCTATTTCACCGAGCCTCTCTCCGAGACAGTGCCCAGATCGTTACGCCTTTCGTGCGGGTCGGAACTTACCCGACAAGGAA
>SRR492388.100960472
TATCGTTGGCCTCTATGGTAGAATCAGTCAGGGGCCTGATAGGCGGTGGTTTACCCTGTGGCGGGAGGCAGCGGGTTGGGGTCGCCTTTTCTCCAACTCGG
>SRR492388.100963232
CGAAATTCCTTGTCGGGTAAGTTCCGACCCGCACGAAAGGCGTAACGATCTGGGCACTGTCTCGGAGAGAGGCTCGGTGCGAATCACAAACCTGTTCAAGG
>SRR492388.100966062	Yes
TATTATGCCTTGAAGAGGACTCGAACCTCCACGCTCTTTAGCACGAGATTTTGATGTCCTTTCATTGATTCCTCCTAAATTGCATTGATTTATCCTAAAGA
>SRR492388.100967202
AGGAGGGGGGTGCCGAAGGCAGGGCTAGTGACTGGAGTGAAGTCGTAACAAGGTAGCCGTACTGGAAGGGGGGGGGGGGGGACCCCCCTTTTTCGGGGGGG
>SRR492388.100977322
CTGTTAGGATGCCTCAGCTGCATACATCACTGCACTTCCACTTGACACCTATCGTAATGATAAACGGCTCCCCTCGCCCCGGCCCTCTCTTTGATTCTCCA
>SRR492388.100981142
ATATCTTGGCAGCATTCCGAGTAACTCCTCAACCTGGAGTTCCACCTGAAGAAGCAGGGGCTGCGGGAGGTGCTGGAACTTTTTCTTGGTCAAGGACCACT
>SRR492388.100992502
TCATTATTAAATCCAAAACATAATGTAAAAAAAGATTCTATATATAATCTTTTTTGTAAAAATTTTTTCATTTTAAAGAAAAAAAATTTGACATGTCTAAA
>SRR492388.100992612
AATGTAACAGGAGAAGGGTTTCCCATTACTTAGCCGGAAAGATATGTGGCCATGAAATAGGGATTAAGTGGAACGGAATTGACTGGGTGGTAGCATAGTTT
>SRR492388.10099272
CTTTAAACGGCCGAATCAGCATATTTTTTGAAGCCCCGTAACTCTTCCTCAGCCAGGCTTGGGCGGAATAGCGGCGCAAGTATTAGTTGCAAGGGAAAAAA
>SRR492388.100996972
ATAGAACCGAATAGAAATAGAAATAGAATAAAAAAATAGGTACAAAAAAAGCCAAACTAAATAAATGGACTTATTCATCTTTCAAAATCAACTACAACTAG
>SRR492388.101000782
AAAGGACGGTTTCAATATTGCCCATACGTAATCCTTTGTATAGACGTTGAGGCGGACGAACACTAAGAGGGGAAAAGCCCCCTCAAATTCCCACACTCCCT
>SRR492388.101003542
GATCTAATAAGTATAAGTTCCTTGTGTCAGAATTGAGAAATTCTATGGCTCCCAACTTTTGTATTTTCTTTTTTTTTTCCTTTGTCTTTTTTTTTTGTAAA
>SRR492388.101009852
TAATAATAATATTAAGTATTAAGGCACATTCTTTTATTTTAATATAATATATTCGTAATTACTTTCTTGAAATTGATAGGTTGAAAATACACTTTAGAAAA
>SRR492388.101011062
TCTTAACCATCCCATCAAATAAGTGGAAGATTCATTAAACTGTGAAACGTTACCCTGCCATAATGTGATGTGTTTCCAATGCCAATAAAAAGTAACCCATC
>SRR492388.101030312
TTATCCTGATGGTAGCAAAAGTAACAATACAGTTTATAATGCTACGGCAGGGGGGGTAAAAAAGAAAAATTTTAGAAAAAAAAAGGGGGGGTAAGAAAAAA
>SRR492388.101038822
TGCTGCTAAATGGAAAGATCTTATCAACGTCCATGAATGAAAAATCATAGATCGAACTGCCGAATCGGAAAAATTGGGTGCTATCATATAGCTTTGTATCG
>SRR492388.101038932
GCCGAAGGCAGGGCTAGTGACTGGAGTGAAGTCGTAACAAGGTAGCCGTACTGGAAGGGGCGGCCGGGGCACCCCCCTTTTTCGGGGGGGGCAAGCGTCTT
>SRR492388.101051332
CCCCCGGAAGGGGGCCTTCTTCGCCTTCCACCTAAGCTGCGCAGGAAAAGCCCAAAGCCAATCCCAGGGAACAGTGAAGCTTCATAGGGTCTTTCTGTCCA
>SRR492388.101062532
AAATATGCTGATTCGGCCGTTTAAAAATACTATATGTAAAATTAAAAAAAGCGATAGATATAATAGATATATATCTAAATTCAAATAAAAAAGAAGGTCAC
>SRR492388.101066342
CTCGTCAAAACAAAAACACAAGTAAAAGATCTTTTTTATTTTATTTTAATAGCCTGGCCTGGTCAGTCCCCAGCCGGGCCTTTTTTTGTTAAAATTAAAAA
>SRR492388.101071932
TGCCGCATTTCGCTCAAAGGGTTGAAGGGAGATAGTGCATCAAGCTGTTCGCAAGGGCCAACTTGATCCTCTTCCCCAGGGATCAATCCCAGACGAGGGAA
>SRR492388.101074982
ATGGGTTTGGTCTTACTTCACCGTCGAGAAACGAAAGAAGGCTTCCACCTCCAAGTTTAACTCAGACGTAGCTCCCTTCTTTTTGGGTGTGAAGCTGTGTC
>SRR492388.101076392
CATCATCTATACATAACGAATTGGTGTGGTATATTCATATCATAACATATGAACAGTAAGAACTAGCATAGATCGGAAGAGCACACGTCTGAACTCCAGTC
>SRR492388.101078992
GTTCGAGTCCTCTTCAAGGCATAATATTGAAATGGAATAAGTTCGGCAGCGGATCCCGGAAAATTGGGGGTCTTTTTTTTTTCATTAATAGGGGGGGGGGG
>SRR492388.101082192
CTACGCCTAGGACACCAGAATATCGAACCATGAACGAAGAAAGGCATGCGAGAAAAGCATATTGGCTAAGGGTTGTTGGGCGCCCACACTTTAGAGGGGGG
>SRR492388.101088312
TACCAAATAAATGACTACTCGAGTCGGGGTTTTGAGCATAAAGATTCCACTGACCCGTAAAAAGTGGGCCTAACCCTTGGGGATGCGGTAATACATTTAAG
>SRR492388.101088362
TTTTTAATAAGATTCCAGCGAGAAGCATACAGGTACTGTAATGTGCCTCACCGTGGGTGTCAGGTAACCAAGTATGTAAAAGATCGGAAGAGCACACGTCT
>SRR492388.101093962
GATTACATGGATTATATCTGTTTGCACAAATACCTCGACGAGTGCCGCTCGTTAATACATAGAGTCCAATAAGCATATCTTGAGTCGGTACCGAAATGGGA
>SRR492388.101111712
TGACGCCTGCCCAGTGCCGGAAGGTTAAGGAAGTTGGTGACCTGATGACAGGGGAGCCGGCGGCCGAAGCCCCGGTGAACGGCGGGCGCAGACATCACGGG
>SRR492388.101114452
GTAGGTCCTGACACAAGGTTAGAATTCTAGCTCTTCCAGAGTGGTATCTCACTGATGGCTCCCGCCCCACCCACCCCGAGGCACGCCCTCCTCCACCCCAA
>SRR492388.101128262
GGAGTATAGCATGGGTTACTTCAGCGCCGTAGCGCCTGGTACTCGAACATTGGCTCCGGGGATTTTTTCTTCCCCCTCTTTTCCTGGAAAAACAGGGGCCC
>SRR492388.101145232
TTTAGTCTTAGTCAATTTTTTTTGAAATGTTTTTTCTATTTTTTTTCTATTTTTTTTCTAGAATGTCTAATATCTTTTTTACATCTTCTACGTGAAAATGT
>SRR492388.101146112
CTGAGAGCCCTCACAGCCCAGGCACAACGACGCAATTATCAGGGGCGCGCTCTACCACTGAGCTAATAGCCCGTCGTTGGCAGGGGCCCGGCGGGGCGCGG
>SRR492388.101156662
AAAATGCATCGGTAGGGGAGCGTTCCGCCTTAGGGGGAAGCAACCGCGCGAGCGGCGGGGGGCGGAGCGGGAGCGGGGATGGCGGGGTTGGGGAACGGAAA
>SRR492388.101161352
TTGTCGGGTAAGTTCCGACCCGCACGAAAGGCGTAACGATCTGGGCACTGTCTCGGAGAGAGGCTCCGGGGAAACAGAAAGGTTTGGGAGGTTCGGGCCTC
>SRR492388.101164432
TCAGGAATACACATTGAATGCGAAGATTACGCATTTCATTTCTGGTAGTAGATCCATAATCAAAAAAGTGTTTGTGATTGTTCCAGAGATCGGAAGAGCAC
>SRR492388.101169302
GTAAACAGAATCAAAAACCTATTCTATTTACAAACGTATTTTCCAAAATTTTTAATTTTCAATAATAATAATGAGACTTATTAGAATTAAGCTAGAATTTG
>SRR492388.101170392
ATCTTGGCAGCATTCCGAGTAACTCCTCAACCTGGAGTTCCACCTGAAGAAGCAGGGGCTGCGGTAGCTGCGGCATTTTTTACTCGTACATGGAACACTTT
>SRR492388.101186182
TGAAAGCATCTAAGTAGTAAGCCCACCCCAAGATGAGTGCTCTCCTATTCCGACTTCCCCAGAGCCTCCGGTAGCACAGCCGAGACAGCAACGGGTTCTCC
>SRR492388.101198292
CCCCCCATCCTTTGGATAGAAGGGCAGAATTTTAGGTTTTTTCATGTTGTCAAAGAGTTGAACAATGGTTTTTTAGATCGGAAGAGCACACGTCTGAACTC
>SRR492388.101201322
TTCATAGAGAAATCTCTGATCAACGATAGAACAAGATCCATCTTGCATCATATATAAGGGATCCCTTGGTTCGGAGCGAGATCGGAAGAGCACACGTCTGA
>SRR492388.10120582
TGATGGTATTCTGCCTAAATAGTAGACACAGGTAATAAATAAGAGAATACTAAAGATTCGAGCCATAGAATTTCTCAATTCTGACACAAGGAACTTATACT
>SRR492388.101210832
AGATGCCCAAATAAGAACATCCATGCCCAGACTGATAAACTATTCATACCAAACGGGTTATATCCATTGATAAGTTGTGAAGAGTTTAACCATAGATAATC
>SRR492388.101218132
CATGAATGAAAAATCATAGATCGAACTGCCGAATCGGAAAAATTGGGTGCTATCATATAGCTTTGTATCGGCTAAGTTCACGAGTTGGAGATAAGCGGGCT
>SRR492388.101218202
CGCCTAGGACACCAGAATATCGAACCATGAACGAAGAAAGGCATGCGAGAAAAGCATATTGGCTAATGATTGGTGGGGTCCCAATCTTTACCGGGGGGGGC
>SRR492388.101232542
TTTATTTTTGATCAAAAAAAAAAAAAAAATCACTATGTGAAATCTTCGTTTTTTTTTTTTTTTTTCTCTTTCGCTTTCCCATAAGTACAGCCTTTTTTGAT
>SRR492388.10123292
CCGAAGGCAGGGCTAGTGACTGGAGTGAAGTCGTAACAAGGTAGCCGTACTGGAAGGGGCGGCCGGGGGGCCCCCCTTTTTGGGGGGGGCGCTAGTTCTTT
>SRR492388.101235682
CAAGTGGGCGATGGCATCGCTCGTATTTATGGTCTTGATGAAGTAATGGCAGGGGGATTTGTAGAATTTGTGGGGGGGGATATAGGGATTTGCCTTTATTT
>SRR492388.101244742
ATTGATTTTCCAATATGCTAGTTTCAACAATTCTCGTTCTTTACATTTCTTCTTAGCGGCTTTTCCGGGGGGAGGGGGTTGGGTTTTTTGTTTTTGTATTT
>SRR492388.101245532
ACTAGCTTATAAGGTTTTTTCTTTTTTCTATAGAATTCTATATCATTTTTTTTTTACATTTGTATTCATATTCTAATCATAATTCTATAACAAATAAATAT
>SRR492388.101247562
TAGCTAATCAGACGCGAGCCCCTCCTCGGGCGGATTCCTCCTTTTGCTCCTCAGCCTACGGGGTATTAGCAGCCGTTTCCAGCTGTTGTTCCCCTCCCAAG
>SRR492388.101250222
TAGCGAAATTCCTTGTCGGGTAAGTTCCGACCCGCACGAAAGGCGTAACGATCTGGGCACTGTCTCGGAGAGAGGCTCCGCGGAAAAGAAAATGCTGTGGG
>SRR492388.101255202
GTGGATTCCTATATATTAAGATATTTCACTTGTATCTTTATACATTACAATAACCATAATGGCTAAAAAAAAAGCAATAGAATAGCCTTTTATAGTTTCAC
>SRR492388.1012582
CTTCGCCTTCCACCTAAGCTGCGCAGGAAAAGCCCAAAGCCAATCCCAGGGAACAGTGAAGCTTCATAGGGTCTTTCTGTCCAGGTGCAGGTAGTCCGCAT
>SRR492388.101262542
ACTCCTATGTTCGAAGCCAGGTGTTGTCTAATTAAACCACGAATTACAAATGTCTGGAAGAGCTCTATTGCTATTTAGATCGGAAGAGCACACGTCTGAAC
>SRR492388.101275502
TAAATAGAGTGAAATTAGAATCTAATGGATATGAATTGATGTAGATACAATTATTAGTATTAGGCTGTTTTCTCTTTTTTTTTTTTCTAAAGTGTATTTTC
>SRR492388.101282692
GCGAAATTCCTTGTCGGGTAAGTTCCGACCCGCACGAAAGGCGTAACGATCTGGGCACTGTCTCGGAGAGAGGCTCCGCGGAAAAAAAACGTACTGGGAGG
>SRR492388.10129442
ATGATATCTTACCTATTCGGGCACATTTCAGCGTCACAAACTTTGTTTTCACACCGTAAAAAAAAAAAAGAAAACTTTGGGTTGGCTGATTAACGGCCAAT
>SRR492388.101304762
AACGCGTTAGCTACAGCACTGCACGGGTCGATACGCACAGCGCCTAGTATCCATCGTTTACGGCTAAGAACACTCGGGTGTCTAATCCCCTTCCCTCACCT
>SRR492388.101307262
GATCATTACGCTTCAACCGGGTTATTCTATTCCACCTCTTAGAAAGAAAAGAACTTAAATCAAAATACTTAATAGCATGGCGATACATTTATACAAAACTT
>SRR492388.101312432
AACCTTCTTTGGATTTGCCCAAGATTTTTGGAATTCATTTATTTCTTTCAGGAGTGGCTTTCTTTGGGTTTTGGGCGTTTTCTTTTACAGGATTATATGGT
>SRR492388.101312542
GTACTTCGAGCTTGGAACGAGCATGAAGAAATTCACGATACTTCTTTATCTTTTGAGTTGTTTTGCTGGATCGGTCGCTCAAGACCTTTGGTCTCTAACCG
>SRR492388.101314102
AGCTGTGGGATGTCAAAATGCATCGGTAGGGGAGCGTTCCGCCTTAGGGGGAAGCAACCGCGCGAGCGGCGGGGGGCGGGGGGGGGGGGGGCACGTGGGGG
>SRR492388.101326662
AAGAAGTAATAAGAACTTGGGCATGGACCTGGAAACCCCCTATTTGCCAATAGAAATGTTGGCCTACTTCTACACCAGATATCTCATATAACCCTTCTTTT
>SRR492388.101332852
TTTACCCACGCCAGCCCCACCGAATAGTCCAATTTTTCCCCCACGACGATAAGGGGCCAAAAGATCTACTACTTTAATTCCTGTTAGATCGGAAGAGCACA
>SRR492388.101336222
CAGCACTGCACGGGTCGATACGCACAGCGCCTAGTATCCATCGTTTACGGCTAAGACTACCGGGGGATCTAATACCCATCCCTCCCCCAGCCTTTGCCCGC
>SRR492388.101358452
TATTCCTCCCGGAACAAAAGGGTCAAAACCCTCCACGCCCCACGCCGGGTTTACGGGTTGTACCTTTCCGGTTAGTCCATAAGGGTCGGATACCCAGATTC
>SRR492388.101359672
ATCTCCTGCCCCAGGTATTATTTCGAGACGTTCTGTATATGAGCCTCTTCAAACAGGACTTATTGCTATTGATTCCATGATCCCTATAGGACGCGGCCAGC
>SRR492388.101361522
TTGAGGTCATATCTAGTATTCAGAGTTTGCCTCGATTTGGTACCGCTCTCGCGGCCCGCACCGAAACAGGGCTTTACCCCTAGCTGTCCAGTCAACTGCCG
>SRR492388.101366502
TATTCCTCCCGGAACAAAAGGGTCAAAACCCTCCACGCCCCACGCCGGGTTTACGGGTTGTACCTTTCCGGTTAGTCCATAAGGGTCGGATACCCATATTC
>SRR492388.101373842
TAACTGCTGAAAGCATCTAAGTAGTAAGCCCACCCCAAGATGAGTGCTCTCCTATTCCGACTTCCCCAGAGCCTCCGGTAGCACAGCCGAGACAGCAACGG
>SRR492388.101374532
CGTTAGCTACAGCACTGCACGGGTCGATACGCACAGCGCCTAGTATCCATCGTTTACGGCTAAGACTACTTGGGGGTCTAAAATCATTTGCTCCCCCACCT
>SRR492388.101390612
GTTCTTTTTTTATCATTTTTTCAGCCAATTCACAGATAAAAAGGAAGAACTTCTAATCGAATCCCTATCTAAATCTAAATAGAGATCGGAAGAGCACACGT
>SRR492388.101391102
TACAAGAGCCATTCGTTCTTTTTTCTCTGACAGATGGTCAGAACTTCATCTGGGTTCGAATCCTACTGAGAGAGATCGGAAGAGCACACGTCTGAACTCCA
>SRR492388.101397302
TTTGGCCGATTGATTTTCCAATATGCTAGTTTCAACAATTCTCGTTCTTTACATTTCTTCTTAGCGGCTTTTTCGGGGGGAGGGGTTTTGTTTTCTTCTTT
>SRR492388.101399272
CAAGAAGCATTAGCTCTCCCTGAAAAGGAGGTGATCCAGCCGCACCTTCCAGTACGGCTAACCTGTTACGACATCAACCCCGACACAAGCCCTACGCCCGG
>SRR492388.101402322
CCACCGCGTAATAGTGCACCTACACGTCTTCATCGACGTTGCTTTTCGACCGGAAGACCGAGAGCTAACTATCAGATCGGAAGAGCACACGTCTGAACTCC
>SRR492388.101404342
AGTTCGATCCTGGCTCAGGATGAACGCTGGCGGCATGCTTAACACATGCAAGTCGGACGGGAAGGGGGGTTTCCAGTGGCGGGCGGGGGGGGACACCCGAA
>SRR492388.101414302
CTAGGTCGGAACAAGTTGATAGGATCCCCTTTTACGCCCCCATGTCCCTCTCGTGTGGCGGCAGGGAGGGGGAAAAAAGGAAGAGAGGGATGGGGGTTCTC
>SRR492388.101419022
TAAGGAATTGGAATGTAATAATATCGATTCATAATGGATTCATATCGATACAGAAGAAAAGGTTCTCTATCGATTCAACAAGTGCTGTACTTATGGGAAAG
>SRR492388.101426222
CTATTTCACCGAGCCTCTCTCCGAGACAGTGCCCAGATCGTTACGCCTTTCGTGCGGGTCGGAACTTACCCGACAAGGAATTTCGCTACCTTAGGACCGTT
>SRR492388.101427942
TTGGTGACCTGATGACAGGGGAGCCGGCGACCGAAGCCCCGGTGAACGGCGGCCGGAACCATAAAGGTCCTAAGGGAGCGGAAATCCCTGTCGGGGAAAGT
>SRR492388.101431022
CACAGACTCCCTTTTTCTATATTTTCAGAGAACGAGAATTTGTATATGATCTATTCGAAGCTGCCACCGGTATGAGAATGATGCATAATAGATCGGAAGAG
>SRR492388.101432222
AATAAAGCAGCTGATTTAGTGTCGCGGGCTGCAATACGGGCTCGGTGTCATTATGTTAATAAAAAATGGCTCCGCGGGCAGTTTACAAAATTGGTCCCTAC
>SRR492388.101441332
GAAGGCAGGGCTAGTGACTGGAGTGAAGTCGTAACAAGGTAGCCGTACTGGAAGGGGGGGGCGGGGGCCCCCCCTTTTTTGGGGGGGGTAAAGTTTTTTGG
>SRR492388.101447652
AGCGGTTCGAGTCCGCTTATCTCCAACTCGTGAACTTAGCCGATACAAAGCTATATGATAGCACCCCATTTTTCCGCTTTGGCCGTTTGGTTTCTTTATTT
>SRR492388.101449212
GGGCGGATTCCTCCTTTTGCTCCTCAGCCTACGGGGTATTAGCAGCCGTTTCCAGCTGTTGTTCCCCTCCCAAGGGCAGGTTCTTACGCGTTACTCATCTG
>SRR492388.101451452
GGGGGTGCCGAAGGCAGGGCTAGTGACTGGAGTGAAGTCGTAACAAGGTAGCCGTACTGGAAGGGGCGGCGGGGGGCCCCCCCTTTTTAGGGGGGGGAATA
>SRR492388.10145532
TTCATATTTTTTTCCACCAAGAACGTTTTAGAAAACTCTTGGACCCTCGGATTTTTATAATCCACTTTTGCCGCAATTCACAGGGTCCACCAGGCATCCGA
>SRR492388.101458162
GAACAACAGCTGGAAACGGCTGCTAATACCCCGTAGGCTGAGGAGCAAAAGGAGGAATCCGCCCGAGGAGGGGCTCCCGGCCGAGTTGCCAGGTTGGCGTG
>SRR492388.101464062
CCTTAGAGAGAGTTGTCTCGCGCCCCTAGGTATTCTCTACCTACCCACCTGTGTCGGTTTCGGGGACAGGTAACCTTTTGGTGAAGGTCGGTCAGATCGGG
>SRR492388.101466962
ATCAGCCATTTATCCCGCTTCCCTCCACATTTAATCGAGTGGTCATGCTAGAAACATAAACAGTCAGAGATAAGATCGGAAGAGCACACGTCTGAACTCCA
>SRR492388.101471032
CCCACGTTCTACCGAACTGAACTAAGAGCGTTTTTCTTTTTTTTTTTTTTTAAAAAAAGAAAAGCTTAGAAAACGGGCATTCTTTAACCGGACCCGATTTT
>SRR492388.101471902
CACCGTCGAGAAACGAAAGAAGGCTTCCACCTCCAAGTTTAACTCAGACGTAGCTCCCTTCTTTTTGGGTGTGAAGCTGTGTCAAACCTAAATACCCAAGA
>SRR492388.101473152
CAAGGTTAGCACGGTTAATAATATCAGCCCAAGTATTAATAACACGTCCTTGACTATCAACTACTGATTGGTTGAAATTGAAACCATTTAGGTTGAAAGCC
>SRR492388.101474532
ACCAACTAGCTAATCAGACGCGAGCCCCTCCTCGGGCGGATTCCTCCTTTTGCTCCTCAGCCTACGGGGTATTAGCAGCCGTTTCCAGCTGTTGTTCCCCT
>SRR492388.101474722
GATGAATTATCCGAAGAGGATCGCTTAACCGTAGCAAGAGCACGAAAAATTGAGCGTTTCTTATCACAACCCTTTTTCGTAGCAGAAGTATTTACAGGTTC
>SRR492388.10148602
CGGAAAAAGGAGAAGTCCAACTCCTAGTAAAATAGGTACTGGAAGTGGAATGAAAGGGATGATCCATGAATATTGATATGTATGTTAGATCGGAAGAGGAC
>SRR492388.101489562
ATAGGTACAAAAAAAGCCAAACTAAATAAATGGACTTATTCATCTTTCAAAATCAACTACAACTAGATGTATCATAATCCCCTTGTTAGATTTATTATTCT
>SRR492388.101489692
TAGATGATGAGAAGATTCCATTGATACAGAGCCAATTCCAATAGACTTATTGGAGGGGGCGATTTGCGTGCATCCAACAGGAATTTAAACTACGAATTAGC
>SRR492388.101500372
TGAAATAGACATGTCTGTGAAGATGCGGACTACCTGCACCTGGACAGAAAGACCCTATGAAGCTTCACTGTTCCCTGGGATTGGCTTTGGGCTTTTCCTGC
>SRR492388.101502552
GATGCCTCAGCTGCATACATCACTGCACTTCCACTTGACACCTATCGTAATGATAAACGGCTCGCCTCCCCCTGACCTTTTCTTTTATTCTCACAAACTCT
>SRR492388.101509492
GGATGACGTTTTCACTATCAGTTATATAGATTAACATACATGTATTACAAAGTGAGCGGCAATTAGGTAAAAGTGAGTGGATGGTTAGATCGGCAGAGCAC
>SRR492388.101510772
GAGGAACTTATCATGAATCCACTGGTTTCTGCTGCTTCGGTTATTGCTGCTGGGTTGGCTGTTTGGGTTGGTTCTATTTGACCTGGGGTCGGGCAAGGGGC
>SRR492388.101519572
AGAGCCCTCACAGCCCAGGCACAACGACGCAATTATCAGGGGCGCGCTCTACCACTGAGCTAATAGCCCGTCGTGCAGGGTCGGCGTCTGCGGGGCGTGAT
>SRR492388.101526622
CATCCCTCATGGGTTGTCCACGGATTCCATTATCAAGAAGTGTATCCACGGCTTTTTGTACCAATTTTTCCTGACACATTACTAATTCCAGATAGGAAGAG
>SRR492388.101528162
GAAGATGCGGACTACCTGCACCTGGACAGAAAGACCCTATGAAGCTTCACTGTTCCCTGGGATTGGCTTTGGGCTTTTCCTGCGCAGCTTAGGTGGAAGGG
>SRR492388.101528522
TCTAAATTTAAGTATGTATCTATCAAAAAAAATAGTATATACAACAGATAACCTCGGGTCCACACTTTTTTTTTAAAAAAAAAAATAGGCGAGGGGAAAGA
>SRR492388.101530452
GCTGGGGAGAGGAAAGGTTCCTTTTTTTAGGGTACTCCTGGGAACAGATCCAGTGGAGACGGGGGGGGGCTTGTAGCTCAGAGGGTTGGGGCCAGGGGCAA
>SRR492388.101531942
GTTCAATGCAGACTTTGATGGGGATCAAATGGCTGTTCATGTGCCTTTATCTTTAGAGGCTCAAGCAGAGGCTCCCTTTCTTTTTTTTTTTTTTTTTTATC
>SRR492388.101532082
GGAAGGGGTCAGATTTATCCTGATGGTAGCAAAAGTAACAATACAGTTTATAATGCTACGGCAGGGGGGAGAAAAAATAAAAATTTAATGAAAAAAAAAGG
>SRR492388.101534002
GGAATTCATCCATGAAAATGAAAAACAAGGGGGGGTTGCTAAAGGGATGAATAAATGGGACGCATAACCGGATATGAGATCGGAAGAGCACAAGTCTGAAC
>SRR492388.101545922
AAGAGACAACCTGGCGAACTGAAACATCTTAGTAGCCAGAGGAAAAGAAAGCAAAAGCGATTCCCGTAGTAGCGGCGAGGGAAAAGGGGGAGACCTCAAAC
>SRR492388.10155352
TGTTAGGATGCCTCAGCTGCATACATCACTGCACTTCCACTTGACACCTATCGTAATGATAAACGGCTCACCTCCGCGCGGCCCTCTCCGTATTTTTGCAA
>SRR492388.101557432
AATGAAAAATCATAGATCGAACTGCCGAATCGGAAAAATTGGGTGCTATCATATAGCTTTGTATCGGCTAAGTTCACGAGTTGGAGATAAAAGGAATCGAA
>SRR492388.101559672
AGAACTTTCTCAGCAATTCTAGTTACATTAAAAATTTAGCTAAAGATTAGATAAAAAAGGCGCGAACTCAAAAAAGAAATAAATAAAACCATAATCATAGA
>SRR492388.101560542
CAGGCAAATCTATAGGACATACTCGAACACATACTTCACAAGCAATGCATTTATCAAATTCAAAATGGATTCGACCGCGGAAGATCGGAAGAGCACACGTC
>SRR492388.101567062
CTCATATCAGATAACAAAGATATAATTAAAAAATTTACTTTTTTTTTTATTCTCTCAATTTTACATAAATAGGCCTTTACGTTTTCAAATGGAATCGATAA
>SRR492388.101567562
TCAGCTGCATACATCACTGCACTTCCACTTGACACCTATCGTAATGATAAACGGCTCGGCTCCCCCCGCCCCTCTCTTTGAATTTTAAAACATTTGTTAAT
>SRR492388.101577872
CGGAAGGTTAAGGAAGTTGGTGACCTGATGACAGGGGAGCCGGCGACCGAAGCCCCGGTGAACGGCGGCCGGCACCATAACCGGCCCAAAGGAGCGCAATT
>SRR492388.101587182
CGCAAGGAGGGGGGTGCCGAAGGCAGGGCTAGTGACTGGAGTGAAGTCGTAACAAGGTAGCCGTACTGGAAGGGGGGGGTGGGGGCCGCCCCTTTTTGGGG
>SRR492388.101595082
TAGCTCCCGAAAAAGACATCATATGGACTGGATTGAAGGGGTCCGTCATCCTAAAATTAGGATTCATTTCTTGTCGAGATCGGAAGAGCACACGTCTGAAC
>SRR492388.101611622
CTAATACCCCGTAGGCTGAGGAGCAAAAGGAGGAATCCGCCCGAGGAGGGGCTCGCGTCTGATTAGCTAGTTGGGGGGGGAATAGCGTAACAAGGGGGTGG
>SRR492388.101616072
GTTTCCGGGATGTTATTCCCCCCTTTTTCGATCAATACTAATTTCGAGACAAATAAACTCCTTTTCTTTTCTATCAAATATATCAAAAAAACGAGCATAAA
>SRR492388.101616382
TGCCGAAGCTGTGGGATGTCAAAATGCATCGGTAGGGGAGCGTTCCGCCTTAGGGGGAAGCAACCGCGCGAGCGGCGGGGGGCGGAAAGGAAACGGAGAAA
>SRR492388.10161652
TGGTGGATATGCGAGCATGATAACTTATATGCTGTTCTATATCGCCATGAATCTAGGAACTTTTGCTTGCATTATATTATTTGGTCTACGTACCGGACCTG
>SRR492388.101620122
GACTGCTGCTCAGTAATTTGTGAACAGGGGAATTTTGATACAATCTATGAAATCACGCTCTGTAGGATTTGAACCTACGACATTGGGTTTTGGAGACCCAC
>SRR492388.101622912
AAGATTAAAACTCAAAGGAATTGACGGGGACCCGCACAAGCGGTGGATGATGTGGATTAATTCGATGCAACGCGAAAAACCTTACCTACCCTTGACATGTA
>SRR492388.101626022
GTATGCTCTATATACTGCCTTTGGGCAACCCTCTCAACAACTAAGAGATCCATTCGAGGAACACGGGGACTAGAGATCGGAAGAGCACACGTCTGAACTCC
>SRR492388.101632832
TCAGATAACAAAGATATAATTAAAAAATTTACTTTTTTTTTTATTCTCTCAATTTTACATAAATAGGCATTTACGTTTTCAAATGGAATCGATAAGAAGAT
>SRR492388.101637622
AGAAAATTGACTCAAAAACAAAAACAAATAAAAAAAATGAAATTCCCGATTTCATATAAGAGCTCCATTGTAGAATTCGGGCCTAATGATTAATCAAGAAG
>SRR492388.101652982
GGATTGGATCAAAGACAATTCTTGAAGGAGGTTTTCAACTTCAGGGATGAATCAAAAAAGAAATCTTTATTGGTTCTACCTCCTAGATCGGAAGAGCACAC
>SRR492388.101657732	Yes
AGGTAAGATTTCCGCTTCTGAATCTCGGTTAATTGAATCTCCTGCCCCAGGTATTATTTCGAAGTTTAAGATAAAAAGGAAATAGGATTTTTATCTGAATA
>SRR492388.101659842
TTTCGCCCATTGCGGAAAATTCCCCACTGCTGCCTCCCGTAGGAGTCTGGGCCGTGTCTCAGTCCCAGTGTGGCTGATCATTCTCTCGGACCAGCTACTGA
>SRR492388.10166042
AAGCACGGATACGGATGCTTTTTTTATCACCAAGTCAAGATGAATATTATATGATAGCGGCAGGGGAATCTTTTGGTCTTTATCGGGGGCGTTAAAAAGAA
>SRR492388.101695482
CCTAAGAGTACTGTTATTATACCTATCAAAGATATTATATACATTATAGAAGGGATAACGATAAAAAGAGGAAGAAGACGAGATCGGAAGAGCACACGTCT
>SRR492388.101695762
TCTAGTACGGAATCTTTTCAAGAAGTGATTGGTCTAACATAAAAAAAAAAAAAGGGGGTTAAGTTTGGTTTTTTTTTTCTTTTCTTGAATAATTTGCCTCT
>SRR492388.101697182
AGACTTTGATGGGGATCAAATGGCTGTTCATGTGCCTTTATCTTTAGAGGCTCAAGCAGAGGCTCCCCTTCTTTTTTTTTTTTCTTTTAATTTTCTTTTCT
>SRR492388.10170012
GGTGTACCAGTTATCGTGCCCACGGTAAACGCTGGGTAGCCAAGTGCGGAGCGGATAACTGCTGAAAGCATCTAAGTAGTAAGCCCACCCCAAGATGAGTG
>SRR492388.101708532
CAGCTATATCAGAGTAATTATGCTGGAATTGAGTCGTATAGCTTCTCATCTGTTATGGCTCCCCCCCCTTTTTTCCGGGTTTTTGGTGCCGGCTTCCCCCT
>SRR492388.101709572
CCTTAACCGCAAGGAGGGGGGTGCCGAAGGCAGGGCTAGTGACTGGAGTGAAGTCGTAACAAGGTAGCCGTACTGGAAGGGGGGGGGGGGGCAACCCCGCT
>SRR492388.10172142
TCAAACCTAAATACCCAAGAAGCATTAGCTCTCCCTGAAAAGGAGGTGATCCAGCCGCACCTTCCAGTACGGCTACCGTGTTACTCCTTCCCGCCCGTCAC
>SRR492388.101727012
CAGCTGCATACATCACTGCACTTCCACTTGACACCTATCGTAATGATAAACGGCTCCTCTCCCCGTGGACTTCTCTTGAATTTTCCAAACTTCTTTCCATC
>SRR492388.101735262
TCATATTCTAATCATAATTCTATAACAAATAAATATACTTTCTTTTTATATTTGAAGTGGAAATATTCAAATTAAAAAATAAATAAAAAAAAAATCTAAAA
>SRR492388.101739282
ATTAAATATATATACAATAGACGCATAGTGGTTAGTAGCTCATTTGGGAACTAGAAATTGAATTGACTTCAAATTTACTTAACGGGGTATTTTTTGCTTTT
>SRR492388.10174032
TAAGATCAGGCCGAAAGGCGTAGTCGATGGACAACAGGTGAATATTCCTGTACTACCCCTTGTTGGCCCCGAGGGACGGAGGAGGCTAGGTTAGCCCAAAG
>SRR492388.101750112
ACCAACCCCAATTCTTTTACCCATTAACATCTTAGAAGATTTTACAAAACCCCTATCACTTAGTTTTCGACTTTTCAGATCGGAAGAGCACACGTCTGAAC
>SRR492388.101765972
GAAGGCAGGGCTAGTGACTGGAGTGAAGTCGTAACAAGGTAGCCGTACTGGAAGGGGCGGCTGGGGGCACCCCCTTTTCTGGGGGGGGCAAGGCTTTTTGG
>SRR492388.101783232
TGATATCTTGGCAGCATTCCGAGTAACTCCTCAACCTGGAGTTCCACCTGAAGAAGCAGGGGCTGCGGGAGCCGCTGGAATTTCTTCTGGGTAAAGGGCAA
>SRR492388.101784132
GCCGAAGGCAGGGCTAGTGACTGGAGTGAAGTCGTAACAAGGTAGCCGTACTGGAAGGGGCGGCCGGGGGCCCCCCCTTTTCAGGGGGGGGAAAGGGTTTT
>SRR492388.101790762
CACGCCCCAAATAAGCCTCACTCACCGGTATCTGAGCAATTTTTCCCGTAGCTTTGACTGAACTTCCTTCTTGGATCATCAAACCGTCACCCATTAATACA
>SRR492388.101800962
AAACCCCGACTCGAGTAGTCATTTATTTGGTACCTCCCAAGGCTCCGGAACTGCCATTCTAACCCTTCTTGGGGGATTCCATCCACAAACGCAAAGTTTAT
>SRR492388.101804532
GCCTCCGTTACCTTTTGGGAGGCCTACGCCCCATAGAAACTGTCTACCTGAGACTGTCCCTTGGCCCGTAGGTCCTGACACAAGGGTAGAATTCTAGCTCT
>SRR492388.101805402
TTTTCCTGGGAGTATAGCATGGGTTACTTCAGCGCCGTAGCGCCTGGTACTCGAACATTGGCTCCGGGGGTTTTCTCTACCCCCTCCTACCCCGTAAAACA
>SRR492388.101811422
CTGGGGGTAGGGTACTACGAAAGGAAGTTGATCATGGATTATCCATAAAGTTAGAATAGATTCTTCCTGGGTCGATGCCCGAGCGAGATCGGAAGAGCACA
>SRR492388.101818872
TGGATAGATACCTTTGGCAGCTAATCCTCTTGATAGTACGGTAGTCGCATCTAAATGTGCAAATGTGGGGGCAGGGGGGGGGGAAGGCAAAACATTTGCAG
>SRR492388.101820552
GTAGTTATTAGATCTAATAAGTATAAGTTCCTTGTGTCAGAATTGAGAAATTCTATGGCTCCCATCTTTTTTATTTTCTTTTTTTTTTTCTTTGTCTTCTT
>SRR492388.101822162
CTAAAAGGGCCAGCTATATCAGAGTAATTATGCTGGAATTGAGTCGTATAGCTTCTCATCTGTTATGGCTCCCCCCCCTTTTTGTCGGGCTTTGGGTGGCA
>SRR492388.101830482
TTCTCAGCAATTCTAGTTACATTAAAAATTTAGCTAAAGATTAGATAAAAAAGGCGCGAACTCAAAAAAGAAATAAATAAAACCATAATCATAGAAATAGA
>SRR492388.101833912
AGTTTATGAATGTCTACGTGGTGGACTTGATTTTACCAAAGATGATGAGAATGTGAACTCCCAACCATTAAGGCGTGGAAGGGCCGGTTTCTTATTTTTTG
>SRR492388.101837722
CATGCCCCTTATGCCCTGGGCGACACACGTGCTACAATGGCCGGGACAAAGGGTCGCGATCCCGCGAGGGTGAGCTAACTCCAAAAACCCGTCCTCAGTTC
>SRR492388.101837942
CATGGGTTTGGTCTTACTTCACCGTCGAGAAACGAAAGAAGGCTTCCACCTCCAAGTTTAACTCAGACGTAGCTCCCTTCTTTTTGGGTGTGAAGCTGTGT
>SRR492388.101866192
ACTGTCCCTTGGCCCGTAGGTCCTGACACAAGGTTAGAATTCTAGCTCTTCCAGAGTGGTATCTCACTGATGGCTCCCCCCCCCCCCCCACCAGGGGGGGG
>SRR492388.101867402
GATCGAGTTTAATGGATTCGCCCTCTGAAACAAGAAGTTCTAGGCCTCGAGGGATAATATCAATAACTTCGCGTCCATTCGATGCATCCACTATGGTTATT
>SRR492388.101867952
AAGGGTCGGATACCCATATTCCAGGACCATATAATCCTGTTACATGAAATGCGCCAAAACCGAAGCAAGCCACTCCTGAAAGAAATAAATGAATTCCAAAA
>SRR492388.101876672
TCTATTTTGACTTGCTCCCTCGCTGTGATCGAATAAGAATGGATAAGAGGCTCGGGGGGTTGACGGGGGGGGGGAGGGGGAGGTATATTTTTGGGGGCGGA
>SRR492388.101882102
CCTAGGACACCAGAATATCGAACCATGAACGAAGAAAGGCATGCGAGAAAAGCATATTGGCTAGTGATTGTGAGGGTCCCAATTTTTACTGGGGGGGGGAC
>SRR492388.10188222
TACAACCAGGCCATAAATTGTTAAAGCTTCCATAAAAGCCAAACTAAGCAATAAAGTACCTAGTATTTTTCCTTCTGCCTCAGGTTGTCTCGCGAAACCTT
>SRR492388.101882902
GTGTTCGGGGGGGAGTTCTTGTCTATCGTTGGCCTCTATGGTAGAATCAGTCAGGGGCCTGGTAGGCGGGGGTTTACCCTGTGGCGGGAGTCACACGGTCG
>SRR492388.101884282
TAAGCTGCGCAGGAAAAGCCCAAAGCCAATCCCAGGGAACAGTGAAGCTTCATAGGGTCTGTCTGTCCAGGTGCAGGTAGTCCGCATCTTCACAGACATGT
>SRR492388.101904632
GAAGCTCCAATGGAAAAATATTGGAAAGGGAAAATGCTTCGAAGATGAACCTCTTCCCATGCGATAGTCAAAAATTCTTGGCGGTATCGAGCTGGAACAGC
>SRR492388.101909922
TTAATCATTAGGCCCGAATTCTACAATGGAGCTCTTATATGAAATCGGGAATTTCATTTTTTTTATTTGTTTTTGTTTTTGAGTCAATTTTCTTAGTTTTT
>SRR492388.101912
GAATCAATAGCAATAAGTCCTGTTTGAAGAGGCTCATATACAGAACGTCTCGAAATAATACCTGGGGCAGGAGATTCAATTAACCGAGATTCAGAAGCGGA
>SRR492388.101915172
TCTAATTTAAAATTGGGCCAAAGAAAGGATTTTAAATTAATTAAGTTATTTTTATCCTTATCAAGATCAAGATCTTTCTTAGATCGGAAGAGCACACGTCT
>SRR492388.10192002
AAGTTCAAATTAGACTAGACAAACAAAAAAAAGTTCATTTTCCTCCCTTGCTTGCATATGTATAGATAATTCAAATATAGATAGATGCAGATCTATAGAGA
>SRR492388.10192462
CGTGCTAAAGAGCGTGGAGGTTCGAGTCCTCTTCAAGGCATAATATTGAAATGGAATAAGTTCGGCAGCGGATCCCGGAATAATGTTGATTTTCTTCCGTT
>SRR492388.101931712
CTAGGTATCCACCGTAAGCCTTTCCTCGTTTGAACCTCGCCCTTAACTTTAAGGCTATGCCATCCTAAGGTGCTGCTAAATGGAAAGATCTTATCAACGTC
>SRR492388.101936372
AATTAGATAAATCTGTTCCGAAAACAAAAAAAATTAAGAGCCTTGAGCCAATAAAAACTAAGAAAATTGACTCAAAAACAAAAACAAATAAAAAAAATGAA
>SRR492388.10194112
TTTTCTTCCATTACAAATTTCTACAAAATTGATTAGAATCTGATCTAACAACAGGGAATTTTCGGGAAATGCAAAAAGATGGAAGACTCTCTATAGATCTG
>SRR492388.101947852
TAGCCCTGCCTTCGGCACCCCCCTCCTTGCGGTTAAGGGAACGACTTCGGGCATGGCCAGCTCCCATAGTGTGGCGGGCGGGGTGGGGAAAGCCCGGGGAC
>SRR492388.101953632
TAATTTAACCAGGAAATTTGTTTTTTATATGTTTCTAAATAGAGTGAAATTAGAATCTAATGGATATGAATTGATGTAGATACAATTATTAGTATTAGGCT
>SRR492388.101956652
AGAGTTTTGTTCATCCTTCACTGTAATAATATCTCGGGGTTTGCAGCGATAACTTGGTATATCAACTATACGACCATTAACTAAAGATCGGAAGAGCACAC
>SRR492388.10195792
ATGCAAATATTGGGATGTTTGGTACGATGAAAGAAATAACTGATTAATTATTTCCTTACGATTATTATAGGCATTATTAGATCGGAAGAGCAGACGTCTGA
>SRR492388.101959892
CAAGATGCCCAAATAAGAACATCCATGCCCAGACTGATAAACTATTCATACCAAACGGGTTATATCCATTGATAAGTTGTGAAGAGTTTAACCATAGATAA
>SRR492388.101964212
GAGTCAAATCTTCTTCATGTAAAACCGGCTTGATTTAGATCGGGAGAATCGTACGGTTTTATGAAACCATGTGCTATGGCTCCCAACCCACGACAAAGCAC
>SRR492388.101975362
CCGAAGCTGTGGGATGTCAAAATGCATCGGTAGGGGAGCGTTCCGCCTTAGGGGGAAGCAACCGCGCGAGCGGCGGGGGGCGGAGCGGGAAGGGGGAAGGC
>SRR492388.101979002
GTAAGCTATTGCCTCACCAACTAGCTAATCAGACGCGAGCCCCTCCTCGGGCGGATTCCTCCTTTTGCTCCTCAGCCTACGGGGTATTAGCAGCCGTTTCC
>SRR492388.101989642
AAAGAGAGGGGTGCCTTCGGGAACGCGGACACAGGTGGTGCATGGCTGTCGTCAGCTCGAGCCGAACGGTGTTGGGGTAAGTCCCGCGACGACCGGCACCC
>SRR492388.101990062
TGGAAAGGACGGTTTCAATATTGCCCATACGTAATCCTTTGTATAGACGTTGAGGCGGAACTAGACCTAAAAGGGATAGGCCGCCGGACATCTCACAAACC
>SRR492388.10199232
CCCGTCACACTATGGGAGCTGGCCATGCCCGAAGTCGTTACCTTAACCGCAAGGAGGGGGGGGCCGAAGGCAGGGCCAGGGGATGGGGGGAAGGGCGCACA
>SRR492388.102002702
GAAGCATTAGCTCTCCCTGAAAAGGAGGTGATCCAGCCGCACCTTCCAGTACGGCTACCCTGTTTCGACTTTCCTCCAATTACTAACCCCTGCTTCCGGAC
>SRR492388.102004562
GCAAGGAGGGGGGTGCCGAAGGCAGGGCTAGTGACTGGAGTGAAGTCGTAACAAGGTAGCCGTACTGGAAGGGGCGGGGGGGGGCCCTCCCTTTCTCGGGG
>SRR492388.10202222
ATAATATCAGCCCAAGTATTAATAACACGTCCTTGACTATCAACTACTGATTGGTTGAAATTGAAACCATTTAGGTTGAAAGCCATAGTACTAATACCTAA
>SRR492388.102028052
TAGGTCCTGACACAAGGTTAGAATTCTAGCTCTTCCAGAGTGGTATCTCACTGATGGCTCCCCACCCCCCGCCCGGGGGGGGTCCTTTTTGTTCTCGTCGC
>SRR492388.102032542
TTACAACATTGTAGCTGCTCATGGTTATTTTGGCCGATTGATCTTCCGTTTCAACAATTCTCGTTCCTTACATTTCTTCTTAGCGGCTTTTTGTGGTTTGG
>SRR492388.102036352
TAATACCCCGTAGGCTGAGGAGCAAAAGGAGGAATCCGCCCGAGGAGGGGCTCGCGGCCGATTAGCTAGGTGGTGGGGGAATAGGTTATCAAAGGGATGAT
>SRR492388.102038472
GGTCCAACGACAATCACCGAGCGCCCCGAATAATCGACCCGTTTCCCAAGCAGAGTCTCGAACACTTTTCCCTCTTTGCCTTCAATTACCACTGTAAATGA
>SRR492388.102049022
CCTTGCTCGGAAACAAAAAGGGGAGTTGATGTATTGAATCCGCCGGGACTGACGGGGCTCGAACCCCCAGCCTCCCCCTTGACCGGGGGGGGGGCTGGCCC
>SRR492388.102052252
TATCTTTAAATAATAAAAAATAATATTGAATGAGAGACAAGTTTAAAACTTTATATTCCATATCTATTTCAATCAGAGATCGGAAGAGCACACGTCTGAAC
>SRR492388.102054132
TAGATGAATTAGATTTAGTAATTCACGTTTGTTTTATTAGTTTAATTGCACTCGGGTCAAACTTTTTTTTTTTTAAAAAAAATGAGGCGGGGGGATTCGTT
>SRR492388.102056902
TTCACACCCCGGAACGCACCGTTCTTATAGAGAGAAAGGCACTTTCACATCCGAAATGGCTGGGGGGAGGAAAAGTTACTTTTTTTTGTGTAACCCTAGGA
>SRR492388.102058512
ACCCCAAGATGAGTGCTCTCCTATTCCGACTTCCCCAGAGCCTCCGGTAGCACAGCCGAGACAACAACGGGTTCTCCGCCCCTCCGGGGATGGGGTACCAG
>SRR492388.10205872
TCTAGTACGGAATCTTTTCAAGAAGTGATTGGTCTAACATAAAAAAAAAAAAGAGGGGTAAGTTTCGTTTTTTTTTTTCTTTCCTTTAAAGTTTTGCCTCT
>SRR492388.102062462
CTATATCAGAGTAATTATGCTGGAATTGAGTCGTATAGCTTCTCATCTGTTATGGCTCCCCCCCCTTTTCGGACGGAATCATGGGCAGAGTCCTCTTTTTT
>SRR492388.10206312
CGAGACTTACTATATCCATGTGAATTCTGCCCCCTATTTCTATGAATATGAAGAAACTATTACATTATTGTTCACTAATAATAGTGAACTCACTGGCGCAG
>SRR492388.102066632
GTTGGCCTCTATGGTAGAATCAGTCAGGGGCCTGATAGGCGGTGGTTTACCCTGTGGCGGGTGTCAGCGGGTTGGGGCCGCGTTTTTCCCAAACGGGGACT
>SRR492388.102080142
TTATCTGTCTTGTCCGGAAAATGGATATCCCCTGAAAATATTTTGAGTTCAATCCTTTTTTTTTTTTTCTCTCCTCGGATCAACCGGCTGCCTACGAGTAT
>SRR492388.10209112
GATGCTGCCCACAGATCAAATTATTTCGTGGATTGGATTTCACTTGACTGTCTACGGCTTCCCTGCGCGAGGTCCGGGGAGAGGGTTTGTTTAAATTAGTC
>SRR492388.102092882
ACTCCACGTATTGCTTGACGTAAAACAGATAGTGGATTTGTTTCTGTCTTTTGTTGAATCTTTTTCAAGGCTCGATAGGTTAAGATTGGAAGAGCCAACCT
>SRR492388.102095442
AAAAAAAGGGTTCTTTCGTATACTTATAGTTTGTTTCGTAAATTCTTTCATTTTGATAGTTTTTTCGATTACATGGATTATATCTGTTTGCAAAAATACCT
>SRR492388.102098122
ATAGTCATTAATAAAGAAAAATTTTTCTTCCATTACAAATTTCTACAAAATTGATTAGAATCTGATCTAACAACAGGGAATTTTCGGGAAATGCAAAAAGA
>SRR492388.102100982
GAATATCGAACCATGAACGAAGAAAGGCATGCGAGAAAAGCATATTGGCTAGTGATTGTGAGGCTCCCATTTTTGACTGGGGTGGGGAACAAAAGCCCATG
>SRR492388.102105582
GAAACTCAAGGCCACTATTCTTGAACAACTTGGATTGGAGCCGGGCTTTCCTTTCGCACTTTATACGGGTATGAAATGAAAATAATGGAAAAAGCTGGATT
>SRR492388.102110322
AGAAAGGGGTGAAAAATTTAGAGATACAATCAACAATCGGGGACTAACCCCCCCAACTATTTACGCTCTAGAAATAAAAATATAAATGAGGGGGGGGGGGG
>SRR492388.102117202
TCTGATTAGCTAGTTGGTGAGGCAATAGCTTACCAAGGCGATGATCAGTAGCTGGCCCGAGTGGATGTCTAGCCACACTGGGACTGCGACACGACCCGATC
>SRR492388.102130932
GCTGTCAAGAACGTAGAGGAGGTAGGATGGTCAGTTGGTCAGATCTAGTATGGATCGTACTATGACGGTTGGTGGGGTCGGCGGGTAGTCTGGAGAGGCCA
>SRR492388.102139682
TTGTCCATCGACTACGCCTTTCGGCCTGATCTTAGGCCCTGACTCACCCTCCGTGGACGAACCTTGCGGAGGAACCCTTGGGTTTTCGGGGCATTGGATTC
>SRR492388.102141172
TACCAGTTATCGTGCCCACGGTAAACGCTGGGTAGCCAAGTGCGGAGCGGATAACTGCTGAAAGCATCTAAGTAGTAAGCCCACCCCAAGATGAGTGCTCT
>SRR492388.102144832
TTTGCACAAATACCTCGACGAGTGCCGCTCGTTAATACATAGAGTCCAATAAGCATATCTTGAGTCGGTACCGAAATGGGATCTCCAATAGCTGGAGGTAA
>SRR492388.102152722
GCGATCTGCCGAAGCTGTGGGATGTCAAAATGCATCGGTAGGGGAGCGGTCCGCCTTAGTGGGAAGCAACCGCGCGAGCGGCGGGGGGCACAGCGGATGGC
>SRR492388.102153182
AAATAAAAAAAAAATCTAAAAATCGTCTAGTACGGAATCTTTTCAAGAAGTGATTGGTCTAACATAAAAAAAAAAAAAAGGGTTAAGTTTCGTTTTTTTTT
>SRR492388.102155612
AAGCTGTGGGATGTCAAAATGCATCGGTAGGGGAGCGTTCCGCCTTAGGGGGAAGCAACCGCGCGAGCGGCGGGGGGCGGAGCGGGAGGGGGGAAGGCGGG
>SRR492388.102157782
AGGAAATCTTTTGATAACACGGATTCAGCCTATTTCTCAATCGTATCCCACGATCAAGACAATTGGCTGAATCCCGTGAAACCATTTAGATCGGAAGAGCA
>SRR492388.102161342
GGAGGGGGGTGCCGAAGGCAGGGCTAGTGACTGGAGTGAAGTCGTAACAAGGTAGCCGTACTGGGAGGGGCGGCTGGGGGACCTCCCCTTTACGGGGGGCG
>SRR492388.102161902
CTATGTTAGAATAGTCATGTGGTATGTTCTCAGATTTTGCACGTGTAATACATGTTCCTTCTATTTCGCCAAGTAAAGAGATCGGAAGAGCACACGTCTGA
>SRR492388.10216672
TCCTGCTCTCATCATCTCTTCCAAATCGATGTTCCAATATCTTTTTGTCATTTCTTTTCACACTTAAAAAGGGGGGCACCCCAAACTAAAATAAAATTTTG
>SRR492388.102166922
GAGCTTTTCCTGGGAGTATAGCATGGGTTACTTCAGCGCCGTAGCGCCTGGTACTCGAACATTGGCTCCGGGGCCTTTTTTTTACCCCTCTTACCCCTAAA
>SRR492388.10217482
TTTGATAAATACTGATAACTCTCGGATCGAGTATTAGAACGGAAAAATCCATTAGATAATGAACTATTGGTTCTAAGCCATAGATCGGAAGAGCACACGTC
>SRR492388.102176262
AAGATATTAATTTTACTGATCAGTAATAATAATGGTAGTTTTTTTGTACAAGGATCTTAATTTAATTATCAACCTCTTAATTCTTCATAGATCGGAAGAGC
>SRR492388.102178062
CCATACCAAGGTTAGCACGGTTAATAATATCAGCCCAAGTATTAATAACACGTCCTTGACTATCAACTACTGATTGGTTGAAATTGAAACCATTTAGGTTG
>SRR492388.102179702
TCTGACTCTCCCACTCCAGTCGTTGCTTTTCTTTCTGTTACTTCGAAAGTAGCTGCTTTTACTTCTACCACTCCAAATTTTGAAATTTCTTTTTATGTTTC
>SRR492388.102181832
TGTACTACAATTCGATGGAGGAACTTTAGGCCACCCTTGGGGAAATGCACCGGGTGCCGTAGCCGAACGAGTAGCTCTGGAAGCATGTCAACAATCTAGCA
>SRR492388.102203362
AAAAAGCCGTGCCTGAAGGTTCACAAGCGGCTGAATCTTTATTACGTAAGGGCTTATTGGGTGATATTGTACCAAGGAATCTTTTCAAAAGGGTTCTGAGC
>SRR492388.102204412
TTGTCTAGGCGGAATTACCCTTACTTGTTTTTTAGTACAAGTAGCTACGGGATTTGCTATGACTTTTTATTACCGTCCAACCGTTAGATAGGAAGAGCATC
>SRR492388.10220612
TTATGAGAATGAAAGAAATAATATTTTCATACAATATCTTAATTGAATTCTATGTAATGATCAATAAAGTAAGTTTTATTTGCTAAGATCGGAAGAGCACA
>SRR492388.102208592
CAAGTTATTATATATATTATGAGTGAGACAGATATGGAGCGAGTAATCTCTTCCCTTATCCAAGAAAAGGTATTTCTAGTTTGCATGGTCCAATCATTTAT
>SRR492388.102213412
CCTCCCTTGCTTGCATATGTATAGATAATTCAAATATAGATAGATGCAGATCTATAGAGAGTCTTCCATCTTTTTGCATTTCCCGAAAATTCCCTGTTGTT
>SRR492388.10223572
GAATATCGAACCATGAACGAAGAAAGGCATGCGAGAAAAGCATATTGGCTAGTGATTTTTAGGGGCCACTTCTTGTCCGGGGGTGGCAGCAAAAGGCTTTG
>SRR492388.102239462
TTCTTGTCTATCGTTGGCCTCTATGGTAGAATCAGTCAGGGGCCTGATAGGCGGTGGGTTTTCCCGTGGGGGGGGTCCGCGGGTTTCGGCTCGTTTAGTTC
>SRR492388.102240412
ATCTTGGCAGCATTCCGAGTAACTCCTCAACCTGGAGTTCCACCTGAAGAAGCAGGGGCTGCGGGAGCTGCTGAAACTTCTACTGGTTGCCAGAGCAAATG
>SRR492388.102241302
AGAAATGATCAAAAGAGCTGTATTTGCCAGAGAATTGGGAGTTCCTATCGTAATGCATGACTACTTAACAGGGGGATTCACCGCAAATACTAGTTGGGCTC
>SRR492388.102265222
TACAAAAACGGCCTTTTTAATAGGAACACTCTCTCTTTGTGGTATCCCCCCCCTTTCTTTTTTTTTGGCGAAAGAAGAAATTCTTAATTGTTGTGTTTTTT
>SRR492388.102268562
TTAATGGGTGACGGTTTGATGATCCAAGAAGGAAGTTCAGTCAAAGCTACGGGAAAAAGTACCAAGGTACCGGTGAGTGAGGCTTTCTTGGGGGCTGTTAT
>SRR492388.102270662
CGTTTTAGGCGATGCTTATGTAGAAAGCCCTTTTTTTGTGTTTCTAGTATTTTATTGACTAACGTTAGTTCTTTTTTTCTATAGTGGGGTTATGTGCTCGT
>SRR492388.102278472
AAACAAGATGCCCAAATAAGAACATCCATGCCCAGACTGATAAACTATTCATACCAAACGGGTTATATCCATTGATAAGTTGTGAAGAGTTTAACCATAGA
>SRR492388.102279402
TAGCACAGCCGAGACAGCAACGGGTTCTCCGCCCCTGCGGGGATGGAGTGACAGAAGTTTTGAGAATTCAAGAGAAGGTCACGTCGAGACGCACTGTTTAT
>SRR492388.102287542
TGAAAGCCATAGTACTAATACCTAAAGCAGTAAACCAAATACCTACTACCGGCCAAGCCGCTAAGAAGAAATGTAAAGAACGAGAATTGTTGAAACTAGCA
>SRR492388.102288982
ACACAAGGTTAGAATTCTAGCTCTTCCAGAGTGGTATCTCACTGATGGCTCCGGCCCCCCCGGGAGAGGGCCCTCTTTCCCCTCCGCCCCGGCTGCGCAGG
>SRR492388.102290922
ACGGAAAGGTGTCTATAACTTCTCCCCCAGGACCTACCCCCCATCCTAAAGTGGCTAGGGGGGGTAGTCAAAATAATTCTTTTTTATTCATCGCGTTTTCA
>SRR492388.102304052
CTCTATGGTAGAATCAGTCAGGGGCCTGATAGGCGGTGGTTTACCCTGTGGCGGGTGTCAGCGGGTTGGGGCCCGCTATTTCCCACTCCGGGACTTAACCG
>SRR492388.102305352
CATCCCGAAAACGTCCGGGTCGAAATATGGCTTTCAAATTAAGTTCCGAATTAGTGGATGCCGATCAAAGGAGTGGCGAGGCCCAACGCGAAAAGGAAGAG
>SRR492388.10231082
CGCGTTAGCTACAGCACTGCACGGGTCGATACGCACAGCGCCTAGTATCCATCGTTTACGGCTAAGAATACCGGGGGATCTTATCCCACTCGCCCCCCTCC
>SRR492388.10231092
TGCCATAGTTAAGGCAGTCAGACCAACTCTCATACGAGCTCCTGGCGGTTCATTCATCTTAACATAAAAAAGGGCCACTTTGGATTCAGAAACATATAGTT
>SRR492388.10231982
TTCAATTGGAATTTGGTTATTCACCATGTACGAGGATCCCCACTAAGCATCCATGGCTGAATGGTTAAAGCGCCCAACTCATAATTAGATCGGAAGAGCAC
>SRR492388.102320932
TCCTCGGGCGGATTCCTCCTTTTGCTCCTCAGCCTACGGGGTATTAGCAGCCGTTTCCAGCTGTTGTTCCCCTCCCAAGGGCAGGTTCTTACGCGTTACTC
>SRR492388.102320972
ACCACTTTGTGGAAAATCGTTAGATATGAATATGTTAGATACCTGTGACTCGATTGACGAAGGTGAAATAGTATCTCTCTCCAAAGATCGGAAGAGCCCAC
>SRR492388.102321162
GCTAAAGAGCGTGGAGGTTCGAGTCCTCTTCAAGGCATAATATTGAAATGGAATAAGTTCGGCAGCGGATCGCGCAACAATGGTGAAATTTTCTCTTTAAT
>SRR492388.102327082
ATGAATCTATTTTTCTCTTTATTGGCTTTTTTTACTTCTTAGCATGATAAATAAATTTTTCTGGCTCGGGTTGGTTGGGTGACGCGGGGGGGCGGAAATTG
>SRR492388.102331442
AAATAATTCTATTAGGTCTAATGTAGTTATTAGATCTAATAAGTATAAGTTCCTTGTGTCAGAATTGAGAAATTCTATGGCTCCGCGTCTCTTTGTTCGTT
>SRR492388.102341412
GACATGTCTGTGAAGATGCGGACTACCTGCACCTGGACAGAAAGACCCTATGAAGCTTCACTGTTCCCTGGGATTGGCTTTGGGCTTTTCCTGCGCAGCTT
>SRR492388.102343502
TTTTATGTTTTCTAAGGGAGAATTGGAATACAGCGGTGAGCTAAGTAAAGCAATGGATAGTTTTGATCCCGGTGAAAAGACTACTATTAGTCCAGACCACT
>SRR492388.102346032
TAATAGTTAATAGTCATTAATAAAGAAAAATTTTTCTTCCATTACAAATTTCTACAAAATTGATTAGAATCTGATCTAACAACAGGGAATTTTCGGGAAAT
>SRR492388.102350172
GGATTCCTCCTTTTGCTCCTCAGCCTACGGGGTATTAGAAGCCGTTTCCAGCTGTTGTTCCCCGCCCAAAGGCAGGTTCTTACGCGTTATCCACACGTACC
>SRR492388.102350252
ATGTTTTTAATCCTCCAAGCTATTAACAAAAGAATATACACCATTTAATCCTCTTACCCACTAAAAATTTTTAATAAATAAAGGGATTTTATCATGAATCC
>SRR492388.102358492
TAGGATGCCTCAGCTGCATACATCACTGCACTTCCACTTGACACCTATCGTAATGATAAACGGCTCGACTCGCCCCGACCTTTTCTTTATGTTCCAAAATA
>SRR492388.102359332
AGGGATAACGATAAAAAGAGGAAGAAGACGAGCTACAAGAAAAATACCCGCCGCTACCATAGTAGCAGCATGTATAAGAGCCGAAATGGGAGTAGGGACCT
>SRR492388.102365192
TATCGATTCCATTTGAAAACGTAAAGGCCTATTTATGTAAAATTGAGAGAATAAAAAAAAAAGTAAATTTTTTAATTATATCTTTGTTATCTGATATGAGA
>SRR492388.10237082
CCTGACACAAGGTTAGAATTCTAGCTCTTCCAGAGTGGTATCTCACTGATGGCTCCGGTCCCCCCCCGAGGGGGACGTCTTCGCCCTTCGCCGAAACTACC
>SRR492388.102372422
TTTCAATTTCAAATTGACTTTTTAGTCTTAGTCAATTTTTTTTGAAATGTTTTTTCTATTTTTTTTCTATTTTTTTTCTAGAATGTCTAATATCTTTTTTA
>SRR492388.102374692
ATTACATGGATTATATCTGTTTGCACAAATACCTCGACGAGTGCCGCTCGTTAATACATAGAGTCCAATAAGCATATCTTGAGTCGGTACCGAAATGGGAT
>SRR492388.102380812
GCCCAGACTGATAAACTATTCATACCAAACGGGTTATATCCATTGATAAGTTGTGAAGAGTTTAACCATAGATAATCTCTTAACCATCCCATCAAATAAGT
>SRR492388.102381462
CCATTTCGAAAAAGACATACACAAATTTAGAAGAGATCAGATGAAATTGAATATCATGAATAATAGACTTAATCATTAACTATATCTTAATACAAGCTTTT
>SRR492388.102383612
CGACAAGGCATTCCATTAATAACAGGCCGTTTTGATCCTTTGGAACAACTCGATGAATTTAGTAGATCTTTTTAGGAGGACCCAATGACTATAGATAGGAC
>SRR492388.102388382
ATAGCATGGGTTACTTCAGCGCCGTAGCGCCTGGTACTCGAACATTGGCTCCGGGGCTTTTTTCTCCCCCCTCTTTCCCTCAAAAAACAGGGACACCTTGC
>SRR492388.102392032
GTTGAGACATTGTAGAATAGGCTAAACCCCGCTTAATGTCTTTTTGAGCAAGAGCTAAAGTGGCTCCTAAGAGTACTGTTATTATACCTATCAAAGATATT
>SRR492388.102406482
TGGTAAATTTACCAAAGACGAAAAAGATTTATTTGATATTATGGATGACTGGTTACGGAGGGGCCGCTTCGGTTTTGTTGGTTTGGGTGGGCTTATGATTT
>SRR492388.102418272
AATCAGCCGCTATTCCTCCAATACGAAAAAAATTATGCATCATTCTCATACCGGTGGCAGCTTCGAATAGATCATATACAAATTCTCGTTCTCTGAAAATA
>SRR492388.10242152
CTACCTTGTTACGACTTCACTCCAGTCACTAGCCCTGCCTTCGGCACCCCCCTCCTTGCGGTTAAGGTAACGACTTCGGGCCTGGCAAGCTCCCATCGTGT
>SRR492388.102421672
GGGAGCCTATTAATGAGGCAAATTCAATGAAACAACAACTGGTACCATAAAGAAGCGGCCATAGGCTGGGAAGGCTTGACCAATTTTAAAGATGATTTAAC
>SRR492388.102422442
CTATTGGATGGGTTACTTTTTATTGGCATTGGAAACACATCACATTATGGCAGGGGGACACGTTCCAAGTTTTAGAATATTTCACCTCCTTTTTGGGGGGG
>SRR492388.102423052
CCCGACAAGGAATTTCGCTACCTTAGGACCGTTATAGTTACGGCCGCCGTTCACCGGGGATTCGGTTGCCGGCTCCCCCGCTATCCGGTCCACCACTTTCC
>SRR492388.102424372
CACCGCCTGTCCAGGGTTGAGCCCTGGGATTTGACGGAGGACTTAAAAAGCCACCTACAGGCCAATGACGACCAATCATTCCGGATAACGCTTGCATTCTC
>SRR492388.102425122
TTAGTCAATTTTTTTTGAAATGTTTTTTCTATTTTTTTTCTATTTTTTTTCTAGAATGTCTAATATCTTTTTTACATCTTCTACGTGAAAATGTTCAATTT
>SRR492388.102427962
CGAATTGGAAAATGGAAAGATTTGTACAAGTTATACCTTTCGTCACCACTTTGTGGAAAATCGTTAGTTATGAATATGTTAGATACCTGTGACTCGATTTA
>SRR492388.102436242
TTTCCCACTTGTCCGACTGTTGCTGAGCAGTTTTTGGATATCAAACGGACCTCTCCAGAAGGTAATTTTAATGTGGCCGATTTCCCCTCTTTTGCAATCAG
>SRR492388.102436772
GTAGCCCAAACAAGATGCCCAAATAAGAACATCCATGCCCAGACTGATAAACTATTCATACCAAACGGGTTATATCCATTGATAAGTTGTGAAGAGTTTAA
>SRR492388.102463502
CAAAAGGATCCGCAGGTTCACCAATCATTGATGGTTCTAAAACCGCTAAGCCTACGTTACGAGCAACGGTACCAAGAATAACTACTTGATACATATGTTAA
>SRR492388.102466322
CATCCCGAAAACGTCCGGGTCGAAATATGGCTTTCAAATTAAGTTCCGAATTAGTGGATGCTGCCCAAAGGAGGGGCGATGCCCTAAGCGAAAAGGGAAAG
>SRR492388.102468922
TTTTTGGAAAACTCCATTTATTCTGGTGTGGATGGCAGGCAGGCCTATATTTCTTTGTTTTTGTGGACCTCCTTACGAGCGTTCTTTTTATCTACTATTTT
>SRR492388.102470122
ATTGCCTCACCAACTAGCTAATCAGACGCGAGCCCCTCCTCGGGCGGATTCCTCCTTTTGCTCCTCAGCCTACGGGGTATTAGCAGCCGTTTCCCGCTGTT
>SRR492388.10247112
TTGGTCTTACTTCACCGTCGAGAAACGAAAGAAGGCTTCCACCTCCAAGTTTAACTCAGACGTAGCTCCCTTCTTTTTGGGTGTGAAGCTGTGTCAAACCT
>SRR492388.102471652
TATAGCGGATTCATAAATAAATTAACAGAATCCTTCTTTTTGAGATCTAAATTTAGATTTTTTTTCTAAATTAAGAATTAAGGGGGTTGTTAATTAATTTA
>SRR492388.102476372
TCGATGTAATGAAAGTGAAGGTCCAACGACAATCACCGAGCGCCCCGAATAATCGACCCGTTTCCCAAGCAGAGTCTCACAAAACCTTTCCACTTTGACCT
>SRR492388.102489202
TAACGATTGTAAATACCGGTACCGTACTTCAAGTGGGCGATGGCATCGCTCGTATTTATGGGCTTGCTGAAGTAATGGCAGGGGGGTTGACAGGATTTTAG
>SRR492388.102491342
TTACAGAATTATTATGAAGCTATGCGACTAGAAATTGACCCCTATGATCGAAGTTATATGCTCTATCATCTAGGCCTTATCCATACAAGAAATGGGTCAGA
>SRR492388.102492732
AGGTTAAGGAAGTTGGTGACCTGATGACAGGGGAGCCGGCGACCGAAGCCCCGGTGAACGGCGGCCGGAAATAAAACGGGCCTAAGGGGGGGGAAATTCTT
>SRR492388.102497012
CTGTTAGGATGCCTCAGCTGCATACATCACTGCACTTCCACTTGACACCTATCGTAATGATAAACGGCTCCTCTCGCCCCCACCTTCTCTTTAACTACCAA
>SRR492388.102500922
TGAGTTTTTCTATTTTGACTTGCTCCCTCGCTGTGATCGAATAAGAATGGATAAGAGGCTCGTGGGAGTGACGTGGGGGGGGAGGGGGCGCATAATTTTTG
>SRR492388.102506122
CTAATTCACTAATTCGTGGGACGATACTGGACTTTTGTATTTAAAAAATGTTTCAGTAGCGATCTCTGATGTAGATGATGGTGGAAGATCGGAAGAGATCA
>SRR492388.102517082
GTATTGATAAGACCATTCACTATTTCTTGAAGCTCAATCTCTCCCCCGGATGAACCATAAAAACAAGAGAAACCATGAACCAGAATAGAATATCTATCACC
>SRR492388.102523602
AGTACGGAAAGGTGTCTATAACTTCTCCCCCAGGACCTACCCCCCATCCTAAAGTGGCTACTAGGGTACGGAAAATTAATCCTTGTTCATACAGTGGTTTT
>SRR492388.102527972
AGATCATATACAAATTCTCGTTCTCTGAAAATATAGAAAAAGGGAGTCTGTGCACCAATATCTGCCATAAAAGGGCCGAGCCATAACAGATGAGAAGCTAT
>SRR492388.102528942
AGGCGTCAGCCCCCATACATGGTCTTACGACTTTGCGGAGTCCTGTGTTTTTGGTAAATAGTAGGCCGGGCCTGGTCACTGCGACCCCCTCTAGGATGAAG
>SRR492388.102528972
TTTCAGTCCCCCGCAATTAAGCTATGCCGCCCATTACTGTGGTATCATCTACTGAAGTGTCATGGTGATTTTACTAATGGTGACATAACGCTTTTCTTTCC
>SRR492388.102533322
CTCCTTTGTCTTTTGTTTTTTTTAGTCGAGCCTTCTGAGATGCTTGAAATTTAGATTTAAACAAAGGCGTAAGATAAAAAGGAAATAGCCATATTCTATGA
>SRR492388.102538732
ATTTTCACGTAGAAGATGTAAAAAAGATATTAGACATTCTAGAAAAAAAATAGAAAAAAAATAGAAAAAACATTTCAAAAAAAATTGACTAAGACTAAAAA
>SRR492388.102543232
TATAGAATCTGACCCATTTTCTCATTGAGCGAAGGGGGACGAAATAAATTCAATCAGATTCATTTTTGATCAAAAAAAAAAAAAACAAATTTCATGAAAAA
>SRR492388.102550152
TTATTTACAACGGAATGGTATACAAAGTCAACAGATCGTAATGAATACAAAATAAGATTTATGGCTAAAAAAACTGGTTAAGATATTTGTAATATAAGACC
>SRR492388.102552732
AGCTAAACCGGCGCTGACGAATAACCAGCCCGCAATGAATAGGGAAGGTATAGTAATGCGATAGATGAACCAGTATCGAATACTGGCATTAAGACTAGCGA
>SRR492388.102558902
TACTTGGGCTGATATTATTAACCGTGCTAACCTTGGAATGGAAGTTATGCATGAACGCATAGCTTACAACTTCCCTCTAGACCTAGATGCTGCTCAAACTC
>SRR492388.102570892
GAAACGAAAGAAGGCTTCCACCTCCAAGTTTAACTCAGACGTAGCTCCCTTCTTTTTGGGTGTGAAGCTGTGTCAAACCTAAATACCCAAGAAGCATTAGC
>SRR492388.102575012
TGGAGCTCTTATATGAAATCGGGAATTTCATTTTTTTTATTTGTTTTTGTTTTTGAGTCAATTTTCTTAGTTTTTATTGGCTCAAGGCTCTTAATTTTTTT
>SRR492388.102578722
TCGTGCTAAAGAGCGTGGAGGTTCGAGTCCTCTTCAAGGCATAATATTGAAATGGAATAAGTTCGGCAGCGGATCGCGAAAAAATTGGGGGCGTTTTAAAC
>SRR492388.102582102
CATCCTCTCGGACCAGCTACTGATCATCGCCTTGGTAAGCTATTGCCTCACCAACTAGCTAATCAGACGCGAGCCCCTCCTCGGGCGGATTCCTCCTTTTG
>SRR492388.102593252
AGTCGGTTCGGACCTCCACTTAGTTTCACCCAAGCTTCATCCTGGTCATAGATAGATCACCCAGGTTCGGGTCCATAAGCAGTGACAATTGCCCTATGAAG
>SRR492388.102597172
GCAGGGCTAGTGACTGGAGTGAAGTCGTAACAAGGTAGCCGTACTGGAAGGGGCGGCTGGGTAAACGCCCCTTTTGGGGGGGGGCATTGTTTTTTTGGGTT
>SRR492388.102607082
GATCCTGTATTACGAGCTAAATTAGCTAAAGGAATGGTTCACAATTATTACGGGGAACCTGCATAGAGAAACGACCTTTTATATATTTTTCCAGTCGTTCT
>SRR492388.102613052
AGAGCGGGATCCACTTTTTGGGGAATATGAGTCGAAGCAATAACAAGAATATTTCTAGTGGAACATCTTTCACAATCCCTGGAGAGAGAGTTTACCAATAG
>SRR492388.102617112
GCCCCGCTTAGTTCATAATGACATCACATTTTTACATATATTATTTTCATTATGCACCTAAAGGAGGAGCCGTATGAGATGAAAATCTCACATACGGTTCT
>SRR492388.102618432
AATTACATCTGAAAATGACTTGTAAACCTTATTATGACCATCCCTCATGGGTTGTCCATGGTTGGCGTAATCAAGAAGTGTATCCATGGACTCGTAAAACC
>SRR492388.102619062
GATATATAGAATAACTTTTTACTTGATTGATAATCACATAAAACCGAAGAAATTTTAGCCATTTGCATCAAAAGATCGGAAGAGCACACGTCTGAACTCCA
>SRR492388.102623532
AGCCTAGACATTCTAATGATTGAGAAAAATTTCACTTTTGCAAAATTAATGAAAAAAGGCATATTGATTATTGAACCTGTGCGTTTGTCTGTACAACACGA
>SRR492388.102625562
ATCCCTTAGACCTTTTTGAAGAAGGTTCGGTTACTAACATGTTTACCTCGATTGTGGGTTATTTATTTATGTTCAAAGCCCTGGCTGCGTTTCTTATATTG
>SRR492388.102634472
ACTTTTTAGTCTTAGTCAATTTTTTTTGAAATGTTTTTTCTATTTTTTTTCTATTTTTTTTCTAGAATGTCTAATATCTTTTTTACATCTTCTACGTGAAA
>SRR492388.102641902
CCATGCGCTTCATATTCGCATGGAGTTCGCTCCCAGAAATATAGCTACCCCTACCCCCTCACGTCAATCCCACGAGCCTCTTATCCATTCTTCTTCGATCA
>SRR492388.102643982
GACTTACTATATCCATGTGAATTCTGCCCCCTATTTCTATGAATATGAAGAAACTATTCCATTATTGTTCACTAATAGATCGGAAGAGCACACGTCTGAAC
>SRR492388.102645622
TTTTTATCCATAGAAAAGAAAGTATTTAGGCATATCTAGTCTTCACTTCATATTTCGATGGGTGAAGCTTAGTTATTTGCTACAGCTGATAAAAATCGTTT
>SRR492388.10264852
CGGAAAGAACACCAACGGCGAAAGCACTCTGCTGGGCCGACACTGACACTGAGAGACGAAAGCTAGGGGAGCGAATGGGATTAGATACCCCAGTAGGCCTA
>SRR492388.102649332
GCCGGGTTTACGGGTTGTACCTTTCCGGTTAGTCCATAAGGGTCGGATACCCATATTTCAGGACCATGTTATCCTGTTACATGAAAAGCGACCACACCGCA
>SRR492388.102652402
ATCGGATCATCTAGATATCCCTTCAACACAACATAGGTCGTCGAAAGGATCTCGGAGAACGGACGACGAACGAAAGCCAGAATCTTTCAGAGATTGAACTC
>SRR492388.102658982
ATAAAGAAGAATCGTGAATTTCTTCATGCTCGTCCCAAGCTCGAAGTACCATTTGCACATATACCAATCCCCTTCGTTACATGATTTCTTCTTGATATATA
>SRR492388.102665492
AAAATAGGTACAAAAAAAGCCAAACTAAATAAATGGACTTATTCATCTTTCAAAATCAACTACAACTAGATGTATCATAATCCCCTTGTTAGATTTATTAT
>SRR492388.102666112
AAGTGGAGGTCCGAACCGACTGATGTTGAAAAATCAGCGGATGAGTTGTGGTTAGGGGGGAGAAGGCATGCGAACCCAGAGCTAGCTGGTGGTCGCGGGAA
>SRR492388.102667522
TTGCGATAGCTAAATGATGATGTGCCATATCGGTTAGCCATAAACTTTGCGTTTGTGGAAGGGAACACCCAAGAAGGGGTAGGAATGCAGGTGCTGATCCC
>SRR492388.102668252
ATTTTATTTGGCAGTTTTCTGGATGTTAAATACTATTGGATGGGTTACTTTTTATTGGCATTGGAAACACATCACATTATGGCAGGGGTGGTTGTAGAGAG
>SRR492388.102668802
GATAATTTATGCAACAGCAGTCCAAACTATAAATTCTTTTGTTAAATTGGAATCTTTAACTGTGAGCTATGGACTCATATGGATATTTGTTCCTAGCTTTT
>SRR492388.102676482
TCGAGAAAGAGATCGATCAATTCCGATTTTTTCTTTTTCTATTGATTCTTTTCGGATCTATAGGTATGGATCCATGGATCTATGTGATTATATAATGACCG
>SRR492388.102676932
AATTCTCGCTGGCCGCGTCCTATAGGGATCATGGAATCAATAGCAATAAGTCCTGTTTGAAGAGACTCGTATACAGAACGTCTCGAAATAAGACCTGGGGC
>SRR492388.102679112
GTTAGGATGCCTCAGCTGCATACATCACTGCACTTCCACTTGACACCTATCGTAATGATAAACGGCTCGCCCCGCCCGGACCCTCTCTTGTATTTTTAAAA
>SRR492388.102685202
TATATTAAATATATATACAATAGACGCATAGTGGTTAGTAGCTCATTTGGGAACTAGAAATTGAATTGACTTCAAATTTACTTAACGGGGTATTTTTTGCT
>SRR492388.102688342
ATGCGTTTTTGGGATCTGCGTGCTCCCTGGTTAGAACCTTTAAGGGGTCCTAACGGTTTGGACTTGAGTAGGTTGAAAAAAGACATACAACCTTGGTAAGA
>SRR492388.102688662
TTTTAATAGCCTAGCGCATCGAACGAAATTAATTGGATTTATACATGTACTCAGCAAGTTGACATACACCCAAGATATTTTATCTTGACATGTGATGAAGA
>SRR492388.102690412
ACTCTCTCTAAGGAACTCGGCAAAATAGCCCCGTAACTTCGGGAGAAGGGGTGCCTCCGCACCAAGGGGGTCGCAGTGACCAGGCCCGGGAGACTGTTTAC
>SRR492388.102692022
CCAGGCGGGATACTTAACGCGTTAGCTACAGCACTGCACGGGTCGATACGCACAGCGCCTAGTATCCATCGTTTACGGCTAAGGCGGCCGCGTGGGTTGTT
>SRR492388.102697162
CCGAAGGCAGGGCTAGTGACTGGAGTGAAGTCGTAACAAGGTAGCCGTACTGGAAGGGGCGGCTGGGGTCCCCCCCTTTCTGGGGGGGGGCAATGTTTTTT
>SRR492388.102698432
AAATATGAAATAAAAAAAATCTACTGTTTCAATTTAATCTCTATCGAATTTGAATATCAGCATAATGAATATAGTCATGATTCGATGGGCTGGGGCTTTTT
>SRR492388.102699682
TATCAAGAGGATTAGCTGCCAAAGGTATCTATCCAGCGGTAGATCCTTTAGATTCAACGTCAACCATTGTACAACCTCGAATCGTTTGCGGGGATGATTTT
>SRR492388.102707902
TTTCGGCCTGATCTTAGGCCCTGACTCACCCTCCGTGGACGAACCTTGCGGAGGAACCCTTGGGTTTTCGGGGCATTGGATTCTCACCAATGTTTGCGTTA
>SRR492388.10272092
GAGCATAAAGATTCCACTGACCCGTAAAAAGTGGGCCTAACCCTTGGGGATGCGGTAATACATTTAAGAAATTATTCCATCGAACATATTCCCCCCTGGGT
>SRR492388.102720932
CATCCCGAAAACGTCCGGGTCGAAATATGGCTTTCAAATTAAGTTCCGAATTAGTGGATGGTGCCAAAGGGGGGGGCGATGCCCAAAGCCAAAAAGAAAAA
>SRR492388.102721312
ACGTCCTTGACTATCAACTACTGATTGGTTGAAATTGAAACCATTTAGGTTGAAAGCCATAGAACTAATACCTAAAGCAGTAAACCAAATACCTACTACCG
>SRR492388.102726622
TCAGTTAACAGCCGACCGCTCTACCACTGAGCTACTGAGGAACAACGGGAGATTAGATCACATAGAGGGCAATTCCCGTTCTCAACCCAGGGCGAATATGA
>SRR492388.102727332
TAAGAAAAGTCCACATGCGGCGAAGGTTTTTTGTTGCTGTCGGAAAAAGGAGAAGTCCAACTCCTAGTAAAATAGGAGATCGGAAGAGCACACGTCTGAAC
>SRR492388.102728602
TGTTGAATAATTTTTATGGATTCTGTCATTTCGCTAATTCGCACTAAATAACGAGCTACTGAATTTCAGTGTTTTTGCCATTGAATTTCCCGTCTTCATTT
>SRR492388.102729142
ACAACAGCTGGAAACGGCTGCTAATACCCCGTAGGCTGAGGAGCAAAAGGAGGAATCCGACCGAGGAGGGGCTCGCGGCTGGACTAATAGAAAGTAGGGGA
>SRR492388.102733972
CCGAATGGATGGTTTTATGTCTCTTACCGGTTCTTCCTCCCGAGTTGAGACCCATCATTCAGATAGAAGGGGGTAAACTAATGAGTTCAGATATTAATGAA
>SRR492388.102734832
CCGGGAACGAATTCACCGCCGTATGGCTGACCGGCGATTACTAGCGATTCCGGCTTCATCTACGGGAGGTGCCGCCCGCCATCCGGACCGGTGGAGGGGTT
>SRR492388.10273742
CGTACCATGTCCAAAATGAACTCCTGCTCTCATTATCTTTTCCAAATCGATGTTCCAATATATTTTTGTCATATATTTTCACATTTAAAAAGGGGGCACCC
>SRR492388.102741002
AAATGCATCGGTAGGGGAGCGTTCCGCCTTAGGGGGAAGCAACCGCGGGAGCGGCGGGGGACGGAGGGGGAGGGGGGATGGGGGGCTTGGTTAAAAGAAAC
>SRR492388.102744202
GAGTTTTTCTATTTTGACTTGCTCCCTCGCTGTGATCGAATAAGAATGGATAAGAGGCTCCCGGGGTTGACGTGGGGGGGGAGGGGGAGGTATAATTTTTG
>SRR492388.102746862
TTCTTTTTGTCTTAATATCTTATAATAGTTAATAGTCATTAATAAAGAAAAATTTTTCGCATATTACACATTTCTACAAAATTGATTAGAATCTGATCCAA
>SRR492388.102752122
ATTAGGTCTAATGTAGTTATTAGATCTAATAAGTATAAGTTCCTTGTGTCAGAATTGAGAAATTCTATGGCTCCCAACTTTTGTTTTTTCTTTTTTTTTAT
>SRR492388.102766812
AAGAATTGCCTTTCATTTTACTTCCAAAAATAAAAAACGATAAAAGAAATAAAAAGTAGTTTTCTTCCTACATGTGAGTCAGATTCATTGATTAGTTCTAA
>SRR492388.102771102
TCAATCTACCCTTGTGTGATTCCTGTTGAATCATATACTGCGGGGCGCAGGGCGGACGATTTCAAAGCGGACTCCCCCTCCCCATTCATTAGATAGAGCAG
>SRR492388.10277202
CCAGCCCTTAGAAGGTATCGTTAAAAGATCATCAATTCCTAATGAAATGGATGTAGCAGTGGCTTGCTGGGAAACCCGCGGCTTTTCTTGATCCAGGAGGT
>SRR492388.102772612
CAAATAAGAACATCCATGCCCAGACTGATAAACTATTCATACCAAACGGGTTATATCCATTGATAAGTTGTGAAGAGTTTAACCATAGATAATCTCTTAAC
>SRR492388.102773852
GTTCTAGTTGCTCTTGAATACCTTCTTTCAAAAAGCTTTCTGCTTCAGCGGTTAATGTCTTGGAAACAGTTATGATTTTTTGAAACCCCGGTTGGTGCGTT
>SRR492388.102777302
AACTAGAAAAAGGAAAAAATATAGTGAGACTTTGATTCTTCGTCGCCGTAGTAAATAGGAGAGAAAATCGAATTTCTTTCTTCGTCTTAAAACATTAGGAG
>SRR492388.102777372
GTGTACCAGTTATCGTGCCCACGGTAAACGCTGGGTAGCCAAGTGCGGAGCGGATAACTGCTGAAAGCATCTAAGTAGTAAGCCCACCCCAAGATTAGTGC
>SRR492388.102777812
GAATGTGACAAAGACGAGTCCCTGTAAAAAAACGAAAATATTCAAAAAAAATTAACGAGTTAATTTTTCTTACGAGTTTTTTATTCGACATCGACTCTAAT
>SRR492388.102778912
AGCCCCGAGGGCGCCATATTCTAGGAGCCCAAACTATGTGATTGAATAAATCCTCCTCTATATGTTGCGGGTCGAGGACTCCTTCTCCTTCCCCTTTATCA
>SRR492388.102782202
ATAACTTAACTTATAAATCCACCTTTTTCCCTAATTAGAAGATGGATTCTGGCTGACTTTCTTGGATTAGTGTTAGACAGGGATACTACTATTTCTTAACA
>SRR492388.102806682
GAGAAATAGTGAGAGAGATCAAGAATGCTCACTATTTCTTAGATTCATGGACCCAATTCAATTCAGAGGGATCTTTCATTCATATTTTTTTCCACCAAGAA
>SRR492388.102815872
TAAAGAAAAAAATACAGTCGTGTGTGCGTCAGGGGTAAAAAGATCCATTTATCTATGATAAGATTTTATTTGGTCCATACACTGTTGTCAATTAGATTATG
>SRR492388.102818012
AAGATGATACGGATTAATCCTTTATTCTTGCGCCAAAGATCTTCCTATTTCCAAAGGAACTGGAGTTACATCTCTTTTCCATTTCCATTCAAGAGTTCTTA
>SRR492388.102818052
TGTGTGATTCCTGTTGAATCATATACTGCGGGGCGCAGGGCGGACGATTTCAAAGCGGGCCGCGGCTCTCCATTCATTAGATAGAGTAGATTTCCTTGATT
>SRR492388.102819832
AATTGCCACAACATGGGCGTTCTTCTTAGCAAGAATTATTGCAGTAGGATAATGGCTAGAACGCATTATAAGGCATTATGGCATTAAGAAATTAAAGCAGT
>SRR492388.102819952
TGACCCGTAAAAAGTGGGCCTAACCCTTGGGGATGCGGTAATACATTTAAGAAATTATTCCATCGAACATATTCCCCCCTGGATGCAGGAATAGCGACATG
>SRR492388.102828462
GGATCTAATCCGCCACGAAAAGTAAGAAATTCCGAGTATTTTGACCAATTTAAGGTAAAAAAGGGAGTTGCTCCTTCAGCAAAACTTGGATAAAGTCGAAC
>SRR492388.102829972
CTTAAGTATAAGTTAATAAGGGGACAGCCATTTTCTAGACTCCAAAATAAGTATTCAAATGAGTAAGTGTTTTTTCAATTTCAACCATTCATTTCACGATG
>SRR492388.102831472
ATTTATCAATCGGTAATGTTGCTCCAATACCTAAGCACAGGGCCGCCGCGGTGCCAATGACAAAGACGGCTGTCGCTACTGGACGGGGTGGGGGACGGTTA
>SRR492388.102838682
GAGCGGACAGCTAATGCATTCCACTTATTGAACAGGGTTCTATGGTCGGTCCGCGACCCCAGGCTACCTAAGGCGTCCTTGGGGTGTTTTTGCGATATCTA
>SRR492388.102840282
TCTGCCGAAGCTGTGGGATGTCAAAATGCATCGGTAGGGGAGCGTTCCGCCTTAGGGGGGAGCAAACGCGCGAGCGGCGGGGGGCGGGGGAGGGAGGCGGA
>SRR492388.102856892
ATTCTTTTTTATTTTAATAATAAAACAATTAATAAATAAAAAAAAAGTTTTCTTACCAACTTCATTTTCTATTCAAAAGATCGGAAGAGCACACTTCAGAC
>SRR492388.102864832
CTAGCCAATATGCTTTTCTCGCATGCCTTTCTTCGTTAATGGTTCGATATTCTGGTGACCTAGGTGTAGAGGAACAACACCAATCAATCCCGAACTTGGTG
>SRR492388.102864852
ATTTGGTTAGACAATGTGTGGTTGGTAAACAAGGATAGATTTTTTAGCAAGGTACGAAACGTATCGTCAAATATTCAATATGATTCTACAAGATCTAGTTT
>SRR492388.102866242
GTAATGAGGGACGTGATCTTGCAGTCGAGGGTAATGAAATTATCCGTGAAGCTTGCAAAAGGGGCACGGAACTAGCTGCTGCTTGTGAAATTTGGAAATAG
>SRR492388.102873852
AGGAATTGGAATGTAATAATATCGATTCATAATGGATTCATATCGATACAGAAGAAAAGGTTCTCTATCGATTCAACAAGTGCTGTACTTATGGGAAAGCG
>SRR492388.102885662
GGGCCTTCTTCGCCTTCCACCTAAGCTGCGCAGGAAAAGCCCAAAGCCAATCCCAGGGAACAGTGAAGCTTCATAGGGTCTTTCTGTCCAGGTGCAGGTAG
>SRR492388.10288942
GGACAAGTGGGAAATGTTGGGGTAAACCAGAAAAGTTTGGGTAGAGCCGGATCGCAATGTTGGCTAGGGAAACGTCCTTGAGTAAGAGGGGATGCTAATAA
>SRR492388.102890342
CGCTTTGTAAACTCCGGTTTGTTCGCGTAAACCAGGATTTGGCTCAGGATTGCCCATTGTTAATTCCAGGGTTTCTCTGAATTTGAAAGTTATCACTTAGT
>SRR492388.102890822
ACACTTTTTTTCGTTCTATTACTAATTTCATTGGATCCTGAACCCTCGTTTTTATGACCTTTCCCCCCCCCCCCCCCCCCCTCTTTATTTTTCTACTTTTT
>SRR492388.102895072
CATTTCCCGAAAATTCCCTGTTGTTAGATCAGATTCTAATCAATTTTGTAGAAATTTGTAATGGAAGAAAAATTTTTCTTTATTAATGACTATTAACTATT
>SRR492388.102898132
ACTGATAAACTATTCATACCAAACGGGTTATATCCATTGATAAGTTGTGAAGAGTTTAACCATAGATAATCTCTTAACCATCCCATCAAATAAGTGGAAGA
>SRR492388.102900842
CTGGTTCTTGGCAGAGGATTTATTAATTTTGATAAGTTTTTATTCTTCAAATTAAACGTATCTTTAGTAAAAAAAGTGCAATTATGCTAGATCGGAAGAGC
>SRR492388.102902192
AATATGAAACCAAGGATACTGATATCTTGGCAGCATTCCGAGTAACTCCTCAACCTGGAGTCCCACCTGAAGAAGCAGGGGCTGCGGGAGCTTCTTTATTT
>SRR492388.102903422
GAATATTCACCTGTTGTCCATCGACTACGCCTTTCGGCCTGATCTTAGGCCCTGACTCACCCTCCGTGGACGAACCTTGCGGAGGAACCCTTGGGGTTTCG
>SRR492388.102905832
AATGCTGAATCTCGTCTGAATCATCATTTGTCAGGACTATTCGGGGTAAGCTCATTGGCTTGGTCCAGGGAATTTGTACAAGACCGTAATCCCTCATCCCA
>SRR492388.102918152
CCTTGTCGGGTAAGTTCCGACCCGCACGAAAGGCGTAACGATCTGGGCACTGTCTCGGAGAGAGGCTCGGGGGAAAAAGAAAGGCTTTGGAGAAGGGGGGC
>SRR492388.102925432
GGTGTAGAAGTAGGCCAACATTTCTATTGGCAAATAGGGGGTTTCCAGGTCCATGCCCAAGTTCTTATTACTTCTTGGGTTGTAATTGCTATCTTATTAGG
>SRR492388.102926812
CGAAGGCAGGGCTAGTGACTGGAGTGAAGTCGTAACAAGGTAGCCGTACTGGAAGGGGCGGCTGGGTGCCCCCCTTTTTCTGGGGGCGTCCATACTGTTTG
>SRR492388.102928972
TGCCTCAGCGGCATACATCACTGCACTTCCACTTGACACCTATCGTAATGATAAACGGCTACCAATCCCGCGAACCTTTCTTTAATTTTCAAAACTATTTT
>SRR492388.102932712
ACATATTTTATTGTCTAGGCGGAATTACCCTTACTTGTTTTTTAGTACAAGTAGCTACGGGATTTGCTATGACTTTTTATAGATCGGAAGAGCACACGTCT
>SRR492388.102940392
CAAAAATCTCTATTTGAAAGGGCTTCTTCCTATACCTATGAATTCCATTGGACCCAGAAATGATACATCGGAAGAATCTTTAGATCGGAAGAGCACACGTC
>SRR492388.102940412
TACCGAAATGGGATCTCCAATAGCTGGAGATAAGAGATTCATATGAGAAAACATAAGTAAACGAGCCTCTGCTTGAGCCTCTAAAGATAAAGGCACATGAA
>SRR492388.102946492
TCTCAGTCCCAGTGTGGCTGATCATCCTCTCGGACCAGCTACTGATCATCGCCTTGGTAAGCTATTGCCTCACCAACTAGCTAATCAGACGCGAGCCCCTC
>SRR492388.102952112
GATGAACGCTGGCGGCATGCTTAACACATGCAAGTCGGACGGGAAGTGGTGTTTCCAGTGGCGGGCGGGGGAGGAAAGCCGAAAAAACCGCCCATGGGGGG
>SRR492388.102952602
AGGTAAACATGTTAGTAACCGAACCTTCTTCAAAAAGGTCTAAGGGATAAGCTACATACGCAATAAATTGAGTTTCTTCTCCTGGAACGGGCTCGATGTGG
>SRR492388.102956962
TTTGCCAGAGAATTGGGAGTTCCTATCGTAATGCATGACTACTTAACAGGGGGATTCACCGCAAATACTAGTTTGGCTCATTCGAGATAATGGCCTACTTC
>SRR492388.102959692
ATGTAGTTATTAGATCTAATAAGTATAAGTTCCTTGTGTCAGAATTGAGAAATTCTATGGCTCGCAACTTTTGTATTTTCTTTTTTTTTTTCTGTGTCTTT
>SRR492388.102961492
GCTCAGGATGAACGCTGGCGGCATGCTTAACACATGCAAGTCGGACGGGAAGTGGTGTTTCCAGTGGCGGGCGGGGGGGGGACGGGGGAGAAACCGCCCCT
>SRR492388.102962582
CCAGACTCCTACGGGAGGCAGCAGTGGGGAATTTTCCGCAATGGGCGAAAGCCTGACGGAGCAATGCCGCGTGGAGATAGAAGGCCTACGGGTACTGACCT
>SRR492388.10297322
CTTAATTCTATATATATATCTATATAGTCATAGAATAGTATAGAATTATTAGAATTTCAAATTTACGAAGTAGACTTATAATTTTTTTCCATTGCACATTG
>SRR492388.102973442
TGAGACTGTCCCTTGGCCCGTAGGTCCTGACACAAGGTTAGAATTCTAGCTCTTCCAGAGTGGTATCTCACTGATGGCTCCCCCCCCCCCCCCCCGCGGGC
>SRR492388.102974792
TTCTAAATTAAGGGCAATACCTATAGTACCCTCCTCAAATTCTACTAGTTCACCTGCCATTACTTCATCAAGACCATAAATACGAGCGATGCCATCGCCCA
>SRR492388.102985272
GAGCAATTTTTCCCGTAGCTTTGACTGAACTTCCTTCTTGGATCATCAAACCGTCACCCATTAATACAACACCAACATTATTGGATTCTAAATTAAGGGCA
>SRR492388.102989212
GTGAAGATACGTTGTTAGGTGCTCCATTTTATTTTCCCATTGAGGCCGAACCTAAACCTGCGCTCGAGAGATAGCTGTCCATACACTGATAAGGGATGTAT
>SRR492388.103001362
GGATTCGCAGATCCTCTAGACGTAGAGCAGCCAGGGCTTTGAACCCAAATACATTACCCACAATCGAGGTAAACATGTTAGTAACCGAACCTAGGTCGGAA
>SRR492388.103002302
AGGCAGGGCTAGTGACTGGAGTGAAGTCGTAACAAGGTAGCCGTACTGGAAGGGGCGGCTGGGGCCACCCCCTTTTTTGGGGGGGGAAAATCTTTTTGGGG
>SRR492388.103006882
ATTTAGTGTCGCGGGCTGCAATACGGGCTCGGTGTCATTATGTTAATAAAAAATGGCTCCGCGGGCGGGTAAAAAAATTGTCCACCACCCAAAAAAGAACT
>SRR492388.10301352
CCATATGTATTCCATGCCCCCTTATCCATATCTAGCTACTGACTATGCTACACAACTGTCATTGTTCACACATCACATGTGGATTGGTGGATCTCTCATTG
>SRR492388.103022292
ATGGACTTATTCATCTTTCAAAATCAACTACAACTAGATGTATCATAATCCCCTTGTTAGATTTATTATTCTTTTTGTCTTAATATCTTATAATAGTTAAT
>SRR492388.103033552
CTTCACAGACATGTCTATTTCACCGAGCCTCTCTCCGAGACAGTGCCCAGATCGTTACGCCTTTCGTGCGGGTCGGAACTTACCCGACAAGGAATTTCGCT
>SRR492388.103034422
ATATTCAAGTTCCTAAAAGGGCCAGCTATCTCAGAGTAATTATGCTGGAATTGAGTCGGATAGCTTCTCATCTGTTATGGCTCCTGCCCCTTTTTTTCGGT
>SRR492388.103046582
TGTCTATTTCACCGAGCCTCTCTCCGAGACAGTGCCCAGATCGTTACGCCTTTCGTGCGGGTCGGAACTTACCCGACAAGGAATTTCGCTACCTTAGGACC
>SRR492388.10304902
AAGACCCTATGAAGCTTCACTGTTCCCTGGGATTGGCTTTGGGCTTTTCCTGCGCAGCTTAGGTGGAAGGCGAAGAAGGCCCCCTTCCGGGGGGGCCCGAG
>SRR492388.10305672
GAGGTATCTATTTTGATCAATTTTTTTTATCGGACATACATTTAATTCTGAAATTTATGATATACTATGTATGATATAGTATATACGTACAAAATCGAGTC
>SRR492388.103058262
TTTCTATTTTGACTTGCTCCCTCGCTGTGATCGAATAAGAATGGATAAGAGGCTCGTGGGAATGGCGGGCGGGGGGAGGGGTAGGTTTATTTCTGGGAGGG
>SRR492388.103060142
TAAAATAAAAGTTGACATACAAGCACTCAATTTGATCTATTTCTTGATTTCCCCGTGAATTGGATGTTTATAACAATAGGGACAGAAAGATCGGAAGAGCA
>SRR492388.103075312
ATAGTGCTTTTTCAACTCTCTCAAAATGGAATCTATTCCAAACATATATGCCATGGTTCTTTACTTCGACAGGGTACAAATATCTAAATTTGATATTTTTA
>SRR492388.103076882
GCAGTTTTCTGGATGTTAAATACTATTGGATGGGTTACTTTTTATTGGCATTGGAAACACATCACATTATGGCAGGGGGGGAGTTCACAATTTTTATAATT
>SRR492388.103085992
ATGGAGAAGACAAAATTGTTTCAAGCACCGACAGAACCATAAGCGCCCCTTGTTTCAAAGAGAGGAGGACGGGTTATTCAGATCGGAAGAGCACACGTCTG
>SRR492388.103087792
GAGATACTCTTGGTCAAGAAATTAATGTGACTTGTGAAGTACAGCAATTATTAGGAAATAATCGAGTTAGAGCTGTAGCTATGAGTGCGACAGGGGGTTTA
>SRR492388.103088402
TCGCCTAGCAGCACGACGCTTTTTTTGCTCTCCCACAACCCCGTTTTCACGGTTTAGGCTGCTCCCATTTCGCGCGCCGCTACTACGGGAATCGCTTTTGT
>SRR492388.103090542
TTGTTACAAAACAAAAATTTGAATTTAAAATCGAAATGATTAAAATGAAATCATAAGAAGGAATATGTAAGCTACCCGCTTTATTTCCATGGGATTGTAGT
>SRR492388.103136782
ATGTAATAATATCGATTCATAATGGATTCATATCGATACAGAAGAAAAGGTTCTCTATCGATTCAACAAGTGCTGTACTTATGGGAAAGCGATAGAGAAAG
>SRR492388.103157402
TGATAAAGACGTTCTTCAGTAATATCATCATGACTCTCGAAGTCATGTGCGGTAGCAATACCAAACCAAATACGACGAGTAGTGGGGTCCTGAGCTAAGCC
>SRR492388.103157652
CACGGAAGAAGCTTTTTGACCAATAGCTACATAAACACATATTACATTTTGGCCTTGTTGATTGAGAATTGTATCTGTGGCTAAATATCTTTTTTTCGGCT
>SRR492388.103165812
CTGACACTGAGAGACGAAAGCTAGGGGAGCGAATGGGATTAGATACCCCAGTAGTCCTAGCCGTAAACGATGGATACTAGGCGGTTCGCACTTCGCACCAG
>SRR492388.103183572
ACTAACCGGAAAGGTACAACCCGTAAACCCGGCGTGGGGCGTGGAGGGTTTTGACCCTTTTGTTCCGGGAGGAATAGCCTCTCATCATATTGCAGCAGGGG
>SRR492388.103188002
TTGATTACTTTCCTCGCGTATGTATAAGATCGAATCCTTTCTATTTCTAAAACGGATTACTAATCCTTAACTTTTCGAGGAATCCTTCATCAGTGGTTGTG
>SRR492388.103196622
CTATTTACAATTCAATAAGTATAACAAGAGGATCCATGGATAAAGCTAGAAAAGTGTCTTTCTAATCGTAACTAAATCTTCAGTTCTAAGATCGGAAGAGC
>SRR492388.103200372
TAACGCGTTAGCTACAGCACTGCACGGGTCGATACGCACAGCGCCTAGTATCCATCGTTTACGGCTAAGACTACTTGGGGGTATAAACCCATGTCCTCCCC
>SRR492388.103207352
GTGCTAAAGAGCGTGGAGGTTCGAGTCCTCTTCAAGGCATAATATTGAAATGGAATAAGTTCGGCAGCGGATCGCGGCAAATTTGGGGTCGTTTCTATTTT
>SRR492388.103212312
TTCGAGTCCTCTTCAAGGCATAATATTGAAATGGAATAAGTTCGGCAGCGGATCGCGGAATATTGGCGATTTTTTTTTTCTTATTGATGGGGGGGGGGGGG
>SRR492388.103222962
TTCATATGTTTGCTCGCGGTAATTGTGAACTCTCGGGAGAATCGATGACTGCATCAAAGATGCACTTGTTATAAATTTGAAAATTTCTAAATTGGCAAATG
>SRR492388.103228582
TATCGTTGGCCTCTATGGTAGAATCAGTCAGGGGCCTGATAGGCGGTGGTTTACCCTGTGGCGGATGTCAGCGGGTCGGGGCCGCTTTTTTCCCACTCCGG
>SRR492388.103228612
ACAAAAATGCAGAAAATTTCCCCTTTTAGTTGGGAATTATCAAAAAAATCAGAAAATGTTACGAAATTCATATTAACAGATCGGAAGAGCACACGTCTGAA
>SRR492388.103228712
TCCGAAAAAAGAGAAGGAAAAGGAGCTTCTTCGGTGGATACCTCTTGGTCCTGTTTAGTCCCACCCGTTTCTGAGGTTCCTTTAAGTTTCTTAGTAAAAAT
>SRR492388.10323662
CATCCATGCCCAGACTGATAAACTATTCATACCAAACGGGTTATATCCATTGATAAGTTGTGAAGAGTTTAACCATAGATAATCTCTTAACCATCCCATCA
>SRR492388.103252812
ATGTCGAATCCTTTCAGAAGCATGAACGAAAAAAAATCTTTAGTATCTAAACAAAATCGAACCATGCCGTTCGGAAGTGATTAAGAAGATCGGAAGAGCAC
>SRR492388.103256452
TGGAGGGTTTTGACCCTTTTGTTCCGGGAGGAATAGCCTCTCATCATATTGCAGCAGGGACGTTGGGTATATTAGCGGGCCTATTCCATCTTAGTGTTCGT
>SRR492388.103257702
CCTTGTCGGGTAAGTTCCGACCCGCACGAAAGGCGTAACGATCTGGGCACTGTCTCGGAGAGAGGCTCCGGGGAAAAAACAAGTCTGTGGAGAAGGGGGCC
>SRR492388.103276582
AAGAGCCTTGAGCCAATAAAAACTAAGAAAATTGACTCAAAAACAAAAACAAATAAAAAAAATGAAATTCCCGATTTCATATAAGAGCTCCATTGTAGAAT
>SRR492388.103282272
AAATGCTGAATCTCGTCTGAATCATCATTTGTCAGGACTATTCGGGGTAAGCTCATTGGCTTGGACAGGGCATTTTGTCCCTGTTCCCATTTCCTCCTCCA
>SRR492388.103285272
AAAGGGTCGAGAAACTCAAGGCCACTATTCTTGAACAACTTGGATTGGAGCCGGGCTTTCCTTTCGCACTTTATACGGGTATGAAATGAAAATAATGGAAA
>SRR492388.103296462
TTGGTTAATCGGTAAAGATACATGTACTTGATGTCCTGCCCAAGAAAGGGACCCAAGTCCTAGTAGCCCTGCTAAATGGTGATTCAACATAGATTCTACAT
>SRR492388.103300752
TTTAGGTCCTGTCGATACTCGCACAACATCTCCTATCCATAAATCCGCGCCTGCTTTTATAGAATTAGATACAAAATTATCGATTTTTGAAACAGATCGGA
>SRR492388.103305792
GGCGGCTCCCTATTTAGTGCTATACATGGGTTCCTTGGTAACTTCTAGTTTGATCAGGGAAACCATAGAAAATGAATCTGCTAATGAAGGTTACAGATTCG
>SRR492388.103308222
CTTTTTGCATTTCCCGAAAATTCCCTGTTGTTAGATCAGATTCTAATCAATTTTGTAGAAATTTGTAATGGAAGAAAAATTTTTCTTTATTAATGACTATT
>SRR492388.103308552
AGTTTATTTTCTAGTCCAAAACGAATAAAGGATCAAAGCCCCTATAGATTACAGTAATTTGAAAAAGTGGGACACGGTTATACATCGACAAGCAAGAAAAA
>SRR492388.103315722
TTGGCAGTTTTCTGGATGTTAAATACTATTGGATGGGTTACTTTTTATTGGCATTGGAAACACATCACATTATGGCAGGGGGAAGGTTCTCACATTTTTTT
>SRR492388.103320262
AAAAGTGAGCTAATCCAACCAATCTTGCTTGCACGATTGAAAGAGCTACTGGTTTATCTTTCCAGCGAATCAAATTTGCCAAAGGTGTGCGTTCATGAGCC
>SRR492388.103321912
TTGAAATGATTAAAATGAAATCATAAGAAGGAATATGTAAGCTACCCGCTTTATTTCCATGGGATTGTAGTTCAATTGGTCAGAGCACCGCCCTGTCAAGG
>SRR492388.10332542
GCTGGCGGCATGCTTAACACATGCAAGTCGGACGGGAAGTGGTGTTTCCAGTGGCGGGAGGGGGGGGTAAGGGGTAGAAACCGGCCCTTGGGGGGGGACCA
>SRR492388.103329452
AAATCAAAAAAAGCACGGATACGGATGCTTTTTTTATCACCAAGTCAAGATGAATATTATATGATAGCGGCAGGGAAATTTTTTGGTTTTTTTTTGGGGGT
>SRR492388.103333542
CCCGAAAACGTCCGGGTCGAAATATGGCTTTCAAATTAAGTTCCGAATTAGTGGATGCCGCCCAAGGGAGGGGGGATGGCATAAGGCAAAAAGAAGAAACC
>SRR492388.103335502
CAGGCCATAAATTGTTAAAGCTTCCATAAAAGCCAAACTAAGCAATAAAGTACCTCGTATTTTTCCTTCTGCCTCAGGTTGTCTCGCGATAACTTCGACAG
>SRR492388.103345182
TAAGGTAGCGAAATTCCTTGTCGGGTAAGTTCCGACCCGCACGAAAGGCGTAACGATCTGGGCACTGTCTCGGAGAGAGGCTCCCGGGAATAAACACTGCT
>SRR492388.103355872
AATTTCGCTACCTTAGGACCGTTATAGTTACGGCCGCCGTTCACCGGGGCTTCGGTCGCCGGCTCCCCTGTTATCAGGGCCCCCACTTTCTTCAACCTCCG
>SRR492388.103356562
TGCTGAATCTCGTCTGAATCATCATTTGTCAGGACTATTCGGGGTAAGCTCATTGGCTTGGACAAGACATTTTTTTCATGCTTCGTTTCTTCCAACCCGGG
>SRR492388.103358272
GGGGAAGTTCAAATTAGACTAGACAAACAAAAAAAAGTTCATTTTCCTCCCTTGCTTGCATATGTATAGATAATTCAAATATAGATAGATGCAGATCTATA
>SRR492388.103361312
CACGTGTAATACATGTTCCTTCTATTTCGCCAAGTAAAGCTCTTCGCATCGCAATGCCTATTGTGTCGGCTTTGGCCTTTCTAAAGGGGGACAGAATTAAG
>SRR492388.103362132
TAAAAAAAAATTCATTGCATGGATATTTATCAAATCCAATATTAAAAAAGCAAAAAATACCCCGTTAAGTAAATTTGAAGTCAATTCAATTTCTAGTTCCC
>SRR492388.10336582
ATAAAGAACCTTTTGAATCAAGTAGTACAATGATTCAAAAGGTTCTCACAATACAAAGACCAAAGACTTCTGATTACAATTCACTTTAATGAGATCGGAAG
>SRR492388.103371652
GGATACTTAACGCGTTAGCTACAGCACTGCACGGGTCGATACGCACAGCGCCTAGTATCCATCGTTTACGGCTAAGACCACAGGGGGGGCTCAACCCCATT
>SRR492388.103372212
ATAGTTGAAGGGCAAAAATACCCCAAGGTTCATTAGATACAATAGAAATAGAATTGTATCCCCCCCCCTTCCTTTTTTTGTTTTCCATCTTTTTTTTTTAT
>SRR492388.103381832
TGGGGGGGAAGTTCAAATTAGACTAGACAAACAAAAAAAAGTTCATTTTCCTCCCTTGCTTGCATATGTATAGAGATCGGAAGAGCACACGTCTGCACTCC
>SRR492388.103384802
ACTATACAATTCCTTTGTTTGTGAGAAAATTTTCTCACAAAAGAAAAGGTAAAGGAAATAAAAAGAGTTAGAGAATGGATTACTACCTATGCCAAGATCGC
>SRR492388.103390262
TCAACACAGCTGCATCCCTTTTCGGAAGACGGTTGAATCCCTCTGTCTTTTGTTCAGTTCTCAAGTCCCTAAACTTATGAAGTCTTTTTTCGGTAGTGGAC
>SRR492388.103391342
GCTCCAATGGAAAAATATTGGAAAGGGAAAATGCTTCGAAGATGAACCTCTTCCCATGCGATAGTCAAAAATTCTTGGCGGTATCGAGCTGGAACAGCCTG
>SRR492388.103399442
TGCGGCACTCCACCGCTTCGCCTAGCAGCACGACGCTTTTTTTGCTCTCCCACAACCCCGTTTTCACGGTTTAGGCTGCTCCCATTTCGCTCGCCGCTACT
>SRR492388.103418872
TACCGGTCTGTTAGGATGCCTCAGCTGCATACATCACTGCACTTCCACTTGACACCTATCGTAATGATAAACGGCTCCTCTCCCCCCTGCACTCTCTTTCT
>SRR492388.103422762
AAATGGAGTCCTGAACTAGCTGCTGCTTGTGAAGTATGGAAAGAGATCACATTTAACTTCCCAACCATCGATAAATTAGATGGCCAAGAGTAGATGAATTA
>SRR492388.103423212
CTGTTTATAAAGCACAGGCTGAAACAGGTGGAATCAAAGGGCATTATTTGAATGCTACTGCGGGTACATGCGAAGAAATGATCAAAAGAGCTGTATTTGCC
>SRR492388.103431432
CTTTTAATTGCTCGGTTCATAAAAAAAATTTCCATATCATAAACCATAAGTCCTGGGGATCGTTCAGAATAAAACGGAAAGATCGGAAGAGCACACGTCTG
>SRR492388.103432492
GAAGAAAATGGAGAAAAAAAAAAAAAATACTCTTTATTTTATTTCGACTATAAAAAATTTAATATCCAATAAAAAAAAAAGAATTTATACCTAAGCTCTTT
>SRR492388.1034352
AACGGAATTTTTTGTTATTCGATCAACTACGGGAAAATTAATGGAATTCATAATTGTTTTCTACTTCTATTATTGTACAAGTATTTAAGAAACAAACTAAA
>SRR492388.103437142
CCAATATATATTCCTAATATGGAAGTTTATATGACATAATATAAATGGAGTGGTAACTCTTGGAAAAAGGTCAAAGAAGAGATCGGAAGAGCACACGTCTG
>SRR492388.103442992
TGCCTCCCAGAATCTACAATTGTCTCAAAAAATCCAATATACATACATTATTGGACCTTTTGAATAACAGTCAAGAAGACCTTATCAAAATTGAACATTTT
>SRR492388.103446142
ATCGCCTTGGTAAGCTATTGCCTCACCAACTAGCTAATCAGACGCGAGCCCCTCCTCGGGCGGATTCCTCCTTTTGCTCCTCAGCCTACGGGGTATTAGCA
>SRR492388.103451192
AATTCTATTAGGTCTAATGTAGTTATTAGATCTAATAAGTATAAGTTCCTTGTGTCAGAATTGAGAAATTCTATGGCTCCCCTCCTTTGTTTTTTTTTTTT
>SRR492388.103452402
TATTCGAAGCTGCCACCGGGATGAGAATGATGCATAATTTTTTTCGTATTGGAGGAATAGCGGCTGATTTACCTTTTGGTTGGGTTGATAAAAGGGTTGGT
>SRR492388.103458612
TATGAGGTCACTGTAAGAAAAGCAATGTAATAAAGCATCAATACAGATTCATTCAGAATAATTAGATAAATCTGTTCCGAAAACAAAAAAAATTAAGAGCC
>SRR492388.103460842
CCTTGTGTGATTCCTGTTGAATCATATACTGCGGGGCGCAGGGCGGACGATTTCAAAGCGGACTCCCCCCCCCCTTTCTTAGAAAGAGAAGAACCGCAAAA
>SRR492388.103467742	Yes
GATATTGAGATTTTTTTACGGAGCGCGAAAAAAGGGATAGGTGCAGAGACTCAATGGAAGCTGTTCTAACAAATGGAGTTCACTACCTTGTGTTCATAAAG
>SRR492388.103468092
CAAATCACCGATTATACCTTTACATACTTGGTTACCTGACACCCACGGTGAGGCACATTACAGTACCTGTATGCTTCTCGCTGGAATCTTATTATAAATGG
>SRR492388.103469942
GGGGGAGTTCTTGTCTATCGTTGGCCTCTATGGTAGAATCAGTCAGGGGCCTGATAGGCGGTGGGTTACCCTGTGGGGGGTGGCCGCGGGTTGGGGCCGCT
>SRR492388.103473642
TCTTAGGCCCTGACTCACCCTCCGTGGACGAACCTTGCGGAGGAACCCTTGGGTTTTCGGGGCATTGGATTCTCACCAATGTTTGCGTTACTCAAGCCGAC
>SRR492388.103476992
TAGGTCTAATGTAGTTATTAGATCTAATAAGTATAAGTTCCTTGTGTCAGAATTGAGAAATTCTATGGCTCCCACATTTTTGTTTCTCTTTTTTTTTTCCT
>SRR492388.103486352
CAAGTTAAACAACTCTCAAATATCTCACCGGAGAATCCTTAAGTACTTTTTTTATTGAGTAGTCTCTAGCCCTTTTTTTGTTTGTCTCATTGCAAATTTTA
>SRR492388.10348702
AATACCCCGTAGGCTGAGGAGCAAAAGGAGGAATCCGCCCGAGGAGGGGCTCGCCTCTGCTTAGCTAGATTGGGTGGGAATAGATTTCCAAGGGGATGATA
>SRR492388.103489412
TCAGTATTTGGGTCTTTTTTTGTTTGAGCTGTACGAGATGAAATTCTCATATACAGTTCTTGGAGGGGGAGTAACCTTGGTTTACCTATCTCAATAAAGCT
>SRR492388.103497842
CAGGAATATTCACCTGTTGTCCATCGACTACGCCTTTCGGCCTGATCTTAGGCCCTGACTCACCCTCCGTGGACGAACCTTGCGGAGGAACCCTTGGGTTT
>SRR492388.103514092
GGGGGGTGCCGAAGGCAGGGCTAGTGACTGGAGTGAAGTCGTAACAAGGTAGCCGTACTGGAAGGGGCGGCTGGGGGGACACCCTTTTTTGGGGGGGGCCA
>SRR492388.103515502
TAAATAAAGGAGTATTTCCTCTAGATGGACGAAGATTTTCTTTGAAAAGTAGTTTTGTCCCATCGGCTAGAGATTGAAGAAATGACAACCGGACGGCGGGA
>SRR492388.103520132
TATAGAAAAGGATACCAAAGATCTTTATTTGTTTATAAACTCTCCTGGTGGATGGGTAATATCTGGAATGGCTAGTTTTTATACCATGCCATTTTGTGCAC
>SRR492388.103528672
TCTGGCTGACTTTCTTGGATTAGTGTTAGACAGGGATACTACTATTTCTTAACAATGAGATGAGGCAATCTATCAAGGAAAGTAAAAAAAAAACGAAACTT
>SRR492388.103530612
CTTCACCGTCGAGAAACGAAAGAAGGCTTCCACCTCCAAGTTTAACTCAGACGTAGCTCCCTTCTTTTTGGGTGTGAAGCTGTGTCAAACCTAAATACCCA
>SRR492388.103547552
AAGAACATCCATGCCCAGACTGATAAACTATTCATACCAAACGGGTTATATCCATTGATAAGTTGTGAAGAGTTTAACCATAGATAATCTCTTAACCATCC
>SRR492388.103556952
CCGAAATGGCTGGGGAGAGGAAAGGTTCCTTTTTTTAGGGTACTCCTGGGAACAGATCCAGTGGAGACGGGGGGGGGGGTGTAGCTCCGGGGGGTTGACGC
>SRR492388.103561062
TCCATGGATCTATGTGTCTATATAGATCCTGTTCCTGGATTAACGAAAATGTGCAAAAGCTCTATTTGCCTCTGCCATTCTATGAGTCTCTTCCTTTTTGC
>SRR492388.103570402
CCTGTTGTCCATCGACTACGCCTTTCGGCCTGATCTTAGGCCCTGACTCACCCTCCGTGGACGAACCTTGCGGAGGAACCCTTGGGTTTTCGGGGCATTGG
>SRR492388.103577142
TCATGCCCGGCAATGCAAGGGAAGCCATCGATAAAATAGTGAACATTGTAAATATTTTTGGAATGGAGATAGCCATTCCACCCATTTCATCAAGATAAACA
>SRR492388.103587822
CATTACCTTCTGGGGGGAATTGCCACAACATGGGCGTTCTTCTTAGCAAGAATTATTGCAGTAGGATAATGGCTAAGGGTAATTTAAAAGTATTTTGATAT
>SRR492388.103596162
AACGACAATCACCGAGCGCCCCGAATAATCGACCCGTTTCCCAAGCAGAGTCTCCCGAAAGTTTCCCTCTTTTCCTTTCATTTCATCTGCAAATTACTTTT
>SRR492388.103599642
AGTCTATGAGGTCACTGTAAGAAAAGCAATGTAATAAAGCATCAATACAGATTCATTCAGAATAATTAGATAAATCTGTTCCGAAAACAAAAAAAATTAAG
>SRR492388.103603002
CACACCCAAAAAGAAGGGAGCTACGTCTGAGTTAAACTTGGAGGTGGAAGCCTTCTTTCGTTTCTCGACGGTGAAGTAAGACCAGATCGGAAGCGCACACG
>SRR492388.103614222
AGACGTAGCTCCCTTCTTTTTGGGTGTGAAGCTGTGTCAAACCTAAATACCCAAGAAGCATTAGCTCTCCCTGAAAAGGAGGTGATCCAGCAGCAACTTCC
>SRR492388.103616902
CAAGGAGGGGGGTGCCGAAGGCAGGGCTAGTGACTGGAGTGAAGTCGTAACAAGGTAGCCGTACTGGAAGGGGGGGCTGGGGGTCACCCCTTTTCAGGGGG
>SRR492388.103633652
CATTGATCATGGTGTCTAATAAGTTATACCTACTATTGGATTTGAACCAATGACTCCTGCCGTATGAAAGCAATACTCTAACCACTGAGTTAAGTAGGTTA
>SRR492388.103639142
GTAGCTCATTTGGGAACTAGAAATTGAATTGACTTCAAATTTACTTAACGGGGTATTTTTTGCTTTTTTAATATTGGATTTGATAAATATCCATGCAATGA
>SRR492388.103642862
TTAGCATGATATTCGGGAATCTCATTGCTATTACTCAAACAAGCATGAAACGTATGCTTGCATATTCGTCCATAGGTCAAATCGGATAGATCGGAAGAGCA
>SRR492388.103658442
GATGAACGTACAGGAAAACCTTCTTTGGATTTGCCCAAGATTTTTGGAATTCATTTATTTCTTTCAGGAGTGGCTTTTTTTGGTTTTGTCGGCGTTCCTGT
>SRR492388.103659702
AACCGCCATCATACTATGATCATAGTATGATCAGTTTTTTTAAATTGTCAATATAATGAAATGAAATGGTATGACTAGCTTATAAGGTTTTTTCTTTTTTC
>SRR492388.103667922
GAAGCTGCCACCGGTATGAGAATGATGCATAATTTTTTTCGTATTGGAGGAATAGCGGCTGATTTACCTTATGGTTGGGTAGATAAATGCTTTGGTTTTTT
>SRR492388.103671552
CTTTTCCTGGGAGTATAGCATGGGTTACTTCAGCGCCGTAGCGCCTGGTACTCGAACATTGGCTCCGGGCATTTTTTTTTCACCCTTTTTACCTCCAAAAA
>SRR492388.103672752
ATGAATTCGTTTAGAATTCCATTTTTGAAATGAATTAAGTAAGGTTAAATTTAATAAAGATGAATAAAAAGGCTTATATAAACAGATCGGAAGAGCACACG
>SRR492388.103689002
CCTGGCGAACTGAAACATCTTAGTAGCCAGAGGAAAAGAAAGCAAAAGCGATTCCCGTAGTAGCGGCGAGGGGAAAGGGGGGGGGCCAAAACCGGGAAAAG
>SRR492388.103690222
TTGCTTGCATTATATTATTTGGTCTACGTACCGGAACTGATAACATTCGAGGTTATTGATAAAAAAGATTTGTCTAAGTCACTTCGTTTCTTTTTGTCTAA
>SRR492388.103690942
CTGACACAAGGTTAGAATTCTAGCTCTTCCAGAGTGGTATCTCACTGATGGCTCCCGCCCCCCCCCCCGGGGGGCGTCCTTTCCTTCTCCCCACGCACGCC
>SRR492388.103691002
CCTTGTCGGGTAAGTTCCGACCCGCACGAAAGGCGTAACGATCTGGGCACTGTCTCGGAGAGAGGCTCCGGGGAAAAGAAATGTCTGTGGGGAAGGGGGGC
>SRR492388.103701722
TTCCTATACCTGTTATGTTCCTTGGATTATTTACAAGCGGGATTCAAGCTCTCATTTTTAGATCGGAAGAGCACACGTCTGAACTCCAGTCACTAGCTTAT
>SRR492388.10370372
GGTGATGGTATTCTGCCTAAATAGTAGACACAGGTAATAAATAAGAGAATACTAAAGATTCGAGCCATAGAATTTCTCAATTCTGACACAAGGAACTTATA
>SRR492388.1037042
CTAAGGGATAAGCTACATACGCAATAAATTGAGTTTCTTCTCCTGGAACGGGCTCGATGTGGTAGCATCGTCCTTTGTAACGATCAAGGCTGGTGCGCCCC
>SRR492388.103704402
CGGGTCGGAACTTACCCGACAAGGAATTTCGCTACCTTAGGACCGTTATAGTTACGGCCGCCGTTCCCCGGGGCTTCGGTCGCCCGCCCCCCCCGCACTAG
>SRR492388.103708622
GTCCTGACACAAGGTTAGAATTCTAGCTCTTCCAGAGTGGTATCTCACTGATGGCTCCCGCCCCCCCCCCGCGGGGGGCTCCTCGCCTCTCCCCCCACCTC
>SRR492388.10371162
TGCCATTTGAACTCATTTCAATAATTCTTTTAGTTGCTTTGATAGGTGCAATTTCTGTGGCTCCCCCAAAAAAAAAGATTTAAATTATTAAAAAAAAAAAA
>SRR492388.103724362
GATGGGCTGTCAAGAACGTAGAGGAGGTAGGATGGTCAGTTGGTCAGATCTAGTATGGATCGTACATGGACGGGAGGTGGGGGGCGCGGCGCTCCCACGGG
>SRR492388.103725112
AAGATTTTTTTTCGTTCATGCTTCTGAAAGGATTCGACATATTTTTGTATAGGTATACCTATAGGATAAAAAGGTAAAATTTTGAGAGATCGGAAGAGCAC
>SRR492388.103726192
CTACAACTAGATGTATCATAATCCCCTTGTTAGATTTATTATTCTTTTTGTCTTAATATCTTATAATAGTTAATAGTCATTAATAAAGAAAAATTTTTCTT
>SRR492388.103732872
AGACAACCTGGCGAACTGAAACATCTTAGTAGCCAGAGGAAAAGAAAGCAAAAGCGATTCCCGTAGTAGCGGCGAACGAAAAGGGGGGCGCCCCAACCCCG
>SRR492388.103740322
TTCGATCCTGGCTCAGGATGAACGCTGGCGGCATGCTTAACACATGCAAGTCGGACGGGAAGTGGTGTTTCCAGTGGCGGGGGGGGGGGGAAAGCGGGAGA
>SRR492388.103743972
ATCCAAGCATTTATCTATCCAACCATAAGGTAAATCAGCCGCTATTCCTCCAATACGAAAAAAATTATGCATCATTCTCATACCGGTGGCAGCTTCGAATA
>SRR492388.103748222
AATTACAGATGTACATGTAATTAAGAAGTTCTTGTATTTGTATATGTAACTTCCGTCCCCCCGCTTTCAAAATTAGAATTTTAATATTGTCGACTAGAACG
>SRR492388.103752452
CTTCATGTATGGTTACCTGATGCCATGGAGGGCCCTACTCCCATTTCGGCTCTTATACATGCTGCTACTATGGGAGCGGCGGGGGGGTGTGTTCTTTTTCT
>SRR492388.103757182
TAGAGAGAAAGGCACTTTCACATCCGAAATGGCTGGGGAGAGGAAAGGTTCCTTTTTTTAGGGTACTCCTGGAGATCGGAAGAGCACACGTCCGAACTCCA
>SRR492388.103757762
ATGAAGTTCTCTATTTCACTTTGATGTGGAAACGTAAAATTGGGGTTTCGTTTTTTAATACTATTATCCTTTTTTCAGATCGGAAGAGCACACGTCTGAAC
>SRR492388.103758242
AAGAGACAACCTGGCGAACTGAAACATCTTAGTAGCCAGAGGAAAAGAAAGCAAAAGCGATTCCCGTAGTAGCGGCGAGGGAAAGGGGAAGGGACGAAAAC
>SRR492388.103761272
CGGTCAGCCATACGGCGGTGAATTCGTTCCCGGGCCTTGTACACACCGCCCGTCACACTATGGGACCCGGCCCTGCCCGAAGACGTTACCCTACACGCACG
>SRR492388.10379772
CGCTAGTAATCGCCGGTCAGCCATACGGCGGTGAATTCGTTCCCGGGCCTTGTACACACCGCCCGTCACACTATGGGAGCTGGCCATGCCCGAGGGCGTTT
>SRR492388.103797722
CCGCGTGCCTGTTGAAGCATGAGCCGGCGACTCATAGGCAGTGGCTTGGTTAAGGGAAGCCACCCGAGCCGTAGCGGAAACGAGGGTTCATAGGGCCAATG
>SRR492388.103800702
TACACGGAAGTGCAAACCATGATTCTTCTGTCTATCAATAACAGCATGCATTGCACGGTGGATGTGAAGAAGTAGGCCATTATCTCGAATGAGCCAAACTA
>SRR492388.103806512
ATATGTTTTATTGCAAAAAAAAGAAGCTCTTTTTGTATTATTCATTGTTAATAATGGTACTAACCCAAAATTTTTATTAAGTTAGATCGGAAGAGCACACG
>SRR492388.103811902
AAGACTTCATAAGTTTAGGGACTTGAGAACTGAACAAAAGACAGAGGGATTCAACCGTCTTCCGAAAAGGGATGCAGCTGTGTTGAAGAGACAATTATATC
>SRR492388.103822842
AAATTCCTTGTCGGGTAAGTTCCGACCCGCACGAAAGGCGTAACGATCTGGGCACTGTCTCGGAGAGAGGCTCCCTGGAACAGACAAGTCTGTGGAAAGGC
>SRR492388.10383482
GAACAAGTTGATAGGATCCCCTTTTACGCCCCCATGTCCCTCTCGTGTGGCGGCAGGGGGGGGGAAAAAGGAAAAAGAGGGATGGGGGTTTTCCCGCTTTT
>SRR492388.103839212
AGGAGGGGGGTGCCGAAGGCAGGGCTAGTGACTGGAGTGAAGTCGTAACAAGGTAGCCGTACTGGAAGGGGGGGCCGGGGGCCCCCCCTTTTCGGGGGGGG
>SRR492388.103849042
TGAGAAATCAAAAAAAGCACGGATACGGATGCTTTTTTTATCACCAAGTCAAGATGAATATTATATGATAGCGGCAGGGGAATTTTTTGGTCTTTAACTGG
>SRR492388.103851432
TCTATTTTTCCCCGGGGGAATCTTTAGAATTACCACTGCTTAGCTTTCAATTCGCCTCTGACCATCAAATGAAATGTGAATAACCCGTCCTCCTCTCTTTG
>SRR492388.103853302
TTACCTTAACCGCAAGGAGGGGGGTGCCGAAGGCAGGGCTAGTGACTGGAGTGAAGTCGTAACAAGGGAGCCGTACTGGAAGGGGGGGGGGGGGGGCGCCC
>SRR492388.103853412
CCATTACAAATTTCTACAAAATTGATTAGAATCTGATCTAACAACAGGGAATTTTCGGGAAATGCAAAAAGATGGAAGACTCTCTATAGATCTGCATCTAT
>SRR492388.103857682
AGGATGAACGCTGGCGGCATGCTTAACACATGCAAGTCGGACGGGAAGTGGTGTTTCCAGTGGCGGGCGGGGGGGGGAAGCGGCAGAACCTGCCCTTGGGG
>SRR492388.10386862
CGGCGGTGAATTCGTTCCCGGGCCTTGTACACACCGCCCGTCACACTATGGGAGCTGGCCCTGTCCGAAGGCGTTACCTTAACCGCAAGGGGGGGGGGGCC
>SRR492388.103876182
TTGAGTACGGTAGGGGCAGAGGGAATTTCCGGTGGAGCGGTGAAATGCGTAGAGATCGGAAAGAACACCAACGGCGAAAGCACTCTGCTGGGCCGACACTG
>SRR492388.10388312
TGTCCATCGACTACGCCTTTCGGCCTGATCTTAGGCCCTGACTCACCCTCCGTGGACGAACCTTGCGGAGGAACCCTTGGGTTTTCGGGGCATTGGATTCT
>SRR492388.103883272
GTCAAGAACGTAGAGGAGGTAGGATGGTCAGTTGGTCAGATCTAGTATGGATCGTACATGGACGGTAGTTGGAGGCGGCGGGTCCTCCTGGGGTTCCTCGC
>SRR492388.10390382
TGTGTTCGGGGGGGAGTTCTTGTCTATCGTTGGCCTCTATGGTAGAATCAGTCAGGGGCCTGATAGGCGGTGGGTTACCCTGGGGCGGGCTTTCGGGGGGC
>SRR492388.103913052
AATGGAAAGATCTTATCAACGTCCATGAATGAAAAATCATAGATCGAACTGCCGAATCGGAAAAATTGGGTGCTATCATATAGCTTTGTATCGGCTAAGTT
>SRR492388.103914762
CGAGAAACGAAAGAAGGCTTCCACCTCCAAGTTTAACTCAGACGTAGCTCCCTTCTTTTTGGGTGGGAAGCTGTGTCAAACCTAAATACCCAAGAAGCATT
>SRR492388.103921912
TTGACAGTAATATCTGTTGTATATGTAAATCCTAGATATGACAATATGCGGAATTCATCCATGAAAATGAAAAACAAGGGGGGGTTGCTAATGGGATGAAT
>SRR492388.103923892
AAAGAGCGTGGAGGTTCGAGTCCTCTTCAAGGCATAATATTGAAATGGAATAAGTTCGGCAGCGGATCGCCCAATATTGGGCAGCTTCTCTCTCTATTGGA
>SRR492388.103931752
GAATCTCAGCAATCACTTGTTCTGATTCCACATATTGATCATTTTGAACTAAAAGAAAACTTTTTGGTGGAATAGTCACGCTAAGATCGGAAGAGCACACG
>SRR492388.103935212
CGGCGTATTTTTTTAAAACGAGGCCCTCGGTAACGTGACATAAAGACTCCTTTTTTGATTGAAATTGTACAAAACTAAATAAAATAGATCGGAAGAGCACA
>SRR492388.103939672
AAAGCATCTAAGTAGTAAGCCCACCCCAAGATGAGTGCTCTCCTATTCCGACTTCCCCAGAGCCTCCGGTAGCACAGCCGAGACAGCAACGGGTTCTCCGC
>SRR492388.103949882
ATGCATATTGTCTGTACATCGGGACGCACAAATTGCATAGTATCATAAATAGCCATTCCAGATATTACCCATCCACCAAGATCGGAAGAGCACACGTCTGA
>SRR492388.103952262
CCCCCGGAAGGGGGCCTTCTTCGCCTTCCACCTAAGCTGCGCAGGAAAAGCCCAAAGCCAATCCCAGGGAACAGTGAAGCTTCATAGGGTCTTTCTGTCCA
>SRR492388.103955282
TTTTCGATTACATGGATTATATCTGTTTGCACAAATACCTCGACGAGTGCCGCTCGTTAATACATAGAGTCCAATAAGCATATCTTGAGTCGGTACCGAAA
>SRR492388.103965752
GCCATATCGGTTAGCCATAAACTTTGCGTTTGTGGATGGAATCCCCCAAGAAGGGGTAGAATGGCAGGTTCGGGTCCTTCGGAGGGACCAAATAAATTAAT
>SRR492388.103969642
GAAAGAACACCAACGGCGAAAGCACTCTGCTGGGCCGACACTGACACTGAGAGACGAAAGCTAGGGGAGCGAATGGGGTTAGATACCCCAGTACTCCCAGA
>SRR492388.103984402
CGTGCTAAAGAGCGTGGAGGTTCGAGTCCTCTTCAAGGCATAATATTGAAATGGAATAAGTTCGGCAGCGGATCCGGGAACAATTGGGATACTTTCTTTTC
>SRR492388.103998362
GCCGGTCAGCCATACGGCGGTGAATTCGTTCCCGGGCCTTGTACACACCGCCCGTCACACTATGGGGGCTGGCCAAGCCCGAAGACGTTACCTTAAACGCC
>SRR492388.103998392
TTCAACAGGAATCACACAAGGGTAGATTGATACAATCTAAACCTCTGGTAAAAAGCCCCCCGTAACCCGGCAGATTCAAGTACATTACATAGTCCGTTTTA
>SRR492388.103999902
CAGAAATAAAGCATTGGGTCGAACTCTTCTTTGGTGTCAAGGTAATAGCTATGAATAGTCATCGACTCCCCGGAAAGGTTAAAAAGATCGGAAGAGCACAC
>SRR492388.104004132
AATTTTCAAATATATATCAAATACAAATATATATCAAATATAAAAATTGATCCTTAAAATATGAAATAGTATTCAATCAAATTTAATTGAATGAACGGAAA
>SRR492388.104011852
TGTGAAGATGCGGACTACCTGCACCTGGACAGAAAGACCCTATGAAGCTTCACTGTTCCCTGGGATTGGCTTTGGGCTTTTCCTGCGCAGCTTAGGTGGAA
>SRR492388.104012662
TGGAAACGGCTGCTAATACCCCGTAGGCTGAGGAGCAAAAGGAGGAATCCGCCCGAGGAGGGGCTCGCGGCTGCTTTGCTAGTTTGGGGGGGCAAAACCTT
>SRR492388.104019902
AGTTCCGACCCGCACGAAAGGCGTAACGATCTGGGCACTGTCTCGGAGAGAGGCTCCGGGGAAAAGAAAAGGCTGTGTAGAAGGGGGCGACCCGCACCTCG
>SRR492388.104026372
AAACGGCTGCTAATACCCCGTAGGCTGAGGAGCAAAAGGAGGAATCCGCCCGAGGAGGGGCTCCCGCGTGGTTTGCTTGGTGGTGGGGGAAAAACTTACCC
>SRR492388.104028522
GCCTCACCAACTAGCTAATCAGACGCGAGCCCCTCCTCGGGCGGATTCCTCCTTTTGCTCCTCAGCCTACGGGGTATTAGCAGCCGTTTCCAGCTGTTGTT
>SRR492388.104030852
TAGCGAAATTCCTTGTCGGGTAAGTTCCGACCCGCACGAAAGGCGTAACGATCTGGGCACTGTCTCGGAGAGAGGCTCCGGGGAAAAGACAAGGCTGTTGA
>SRR492388.104033672
CCCTCCTCGGGCGGATTCCTCCTTTTGCTCCTCAGCCTACGGGGTATTAGCAGCCGTTTCCAGCTGTTGTTCCCCTCCCAAGGGCAGGTTCTTACGCGTTA
>SRR492388.104035842
AAAATTTTTCTTCCATTACAAATTTCTACAAAATTGATTAGAATCTGATCTAACAACAGGGAATTTTCGGGAAATGCAAAAAGATGGAAGACTCTCTATAG
>SRR492388.104038322
TCGTTCGAGCTTTTCCTGGGAGTATAGCATGGGTTACTTCAGCGCCGTAGCGCCTGGTACTCGAACATTGGCTCCGGGCCGGTTTCCTACCCCCTCTTTCC
>SRR492388.104043472
CAAACGGTAGTTCGGTTTCCATTCCCCAAACTGTTAAGAAACAAAAATCATTTTTTTCTCCTTTGTCTTTTGTTTTTTTTAGTCAGATCGGAAGAGCACAC
>SRR492388.104061012
CGGGAGCTACTTTACCATATTCGGAATTCAATGGTTTCAATAACTTCCCTACAGTAGTGCTTCTTGGACCAGATCTAGAACTATCTTCAACAGATTGTGTA
>SRR492388.104071112
CTCCAACTCGTGAACTTAGCCGATACAAAGCTATATGATAGCACCCAATTTTTCCGATTCGGCAGGTCGATCTATGATTTTTCATTCATGGACGTTGATAA
>SRR492388.104074342
TTTGGATTTGCCCAAGATTTTTGGAATTCATTTATTTCTTTCAGGAGTGGCTTTTTTTGGTTTTGGCGGCTTTCCTGTAACAGGATTTTATGGTCCTGGGA
>SRR492388.104076202
TTCTAGCGATTCGCAATCCACAAACAATTCCAACTGACGGCCAAAATTTCTTAGAATTTGTCCTTGAATTCATTCGAGACGTGAGTAAAACCCAGAGATCG
>SRR492388.104078602
GGCCAATCTGGTATTTCACAATAAAGTGATAGATGGAACTGCTATTAAACGACTTATTAGCCGATTAATAGATCACTTCGGGATGGCATATACATCACACA
>SRR492388.104084862
ATGATCCCTATAGGACGCGGCCAGCGAGAATTAATTATTGGTGACAGACAGACCGGTAAAACAGCAGTAGCCACAGATACAATTCTCAATCAACAAGGCCA
>SRR492388.104088332
CAACGACGCAATTATCAGGGGCGCGCTCTACCACTGAGCTAATAGCCCGTCGTGGGGGGCCCGCCCGCCGGGGCCCCCGGGGCGCCACACACAGCACAGAG
>SRR492388.104099152
TGGGGGTTCTTTTCACCCTTCCCTCACGGTACTACTTCGCTATCGGTCACCCAGGAGTATTTAGCCTTGCAAGGTGGTCCTTGCTGATTCACACGGGATTC
>SRR492388.104107732
GGGGGGGAGTTCTTGTCTATCGTTGGCCTCTATGGTAGAATCAGTCAGGGGCCTGATAGGCGGGGGTTTACCCTGTGGCGGGGGGGCGCGGGTCCCGGGCC
>SRR492388.104120012
ATTTATTTTTCAATAGAATCCTCTATATTCATGGGTTCCGTCGTTCCCATCGCTTCTTGATTAATCATTAGGCCCGAATTCTACAATGGAGCTCTTATATG
>SRR492388.104125992
AAAAAAACGAAACTTAACCCTCTTTTTTTTTTTTATGTTAGACCAATCACTTCTTGAAAAGATTCCGTACTAGACGATTTTTAGATTTTTTTTTTATTTAT
>SRR492388.104132062
TTAGGCCCTGACTCACCCTCCGTGGACGAACCTTGCGGAGGAACCCTTGGGTTTTCGGGGCATTGGATTCTCACCAATGTTTGCGTTACTCAAGCCGACAT
>SRR492388.104139292
ATTATCACAAATTAAAGTTAGTAACTTTTGTAAATTAAAGGCTGTTCTTGAATATAACATATGCATAACATCCTTTTTTGTTAAGAAAGATCGGAAGAGCA
>SRR492388.104144582
ACCAACATTATTGGATTCTAAATTAAGGGCAATACCTATAGTACCCTCCTCAAATTCTACTAATTCACCTGCCATTACTTCATCAAGACCATAAATACGAG
>SRR492388.104147182
AAGCGTCTTTATTATGGACGCTTTATTCTGTCTCCACTTATGAAAGGCCAAGCCGACACAATAGGCATTGCGATGCGAAGAGCTTTACTTGGCGAAAAAGA
>SRR492388.104155972
GTTAGCTACAGCACTGCACGGGTCGATACGCACAGCGCCTAGTATCCATCGTTTACGGCTAAGACTACTGGGGGATCTAATACCACTCGCCCCCCCCGCCT
>SRR492388.104160532
AAAATCAACTACAACTAGATGTATCATAATCCCCTTGTTAGATTTATTATTCTTTTTGTCTTAATATCTTATAATAGTTAATAGTCATTAATAAAGAAAAA
>SRR492388.104160792
TAGCTACAGCACTGCACGGGTCGATACGCACAGCGCCTAGTATCCATCGTTTACGGCTAAGAAAACCGGGGGATCTAATCCCCTTCGCATCCCCAGCCTTC
>SRR492388.104166692
CTAGATGTATCATAATCCCCTTGTTAGATTTATTATTCTTTTTGTCTTAATATCTTATAATAGTTAATAGTCATTAATAAAGAAAAATTTTTCTTCCATTA
>SRR492388.104167212
TTTCAATTATTAAGTTCCGAAATGTAGCCTATTTTTTTTATAGATAATATTATCCTATTTCAATAAATGAGATCGGAAGAGCACACGTCTGAACTCCAGTC
>SRR492388.104167912
TCTTTGGATTTGCCCAAGATTTTTGGAATTCATTTATTTCTTTCAGGAGTGGCTTGGTTTGGTTTTTTGGGAGTTCCTGTTAAAGGATTTTAAGATCCAGT
>SRR492388.104170282
CATCAAATGAAAAAGAATCCCTTCGATTTTATAATCTGAATAAAGAAGAAAAAGAATCGGCCGGGCAAGTAAGATCGGAAGAGCACACGTCTGAACTCCAG
>SRR492388.104170712
GTTCTATTACTAATTTCATTGGATCCTGAACCCTCGTTTTTATGACCTTTCCCCCCCCCCCCCCCTCTTTTTCTTTTTTTTTTTTCTTTAAAGAAGAGGGG
>SRR492388.104180282
AATGGATTCGCCCTCTGAAACAAGAAGTTCTAGGCCTCGAGGGATAATATCAATAACTTCGCGTCCATTCGATGCATCCACTATGGTTATTTCGTATCCCC
>SRR492388.104181402
CTGTTGTCCATCGACTACGCCTTTCGGCCTGATCTTAGGCCCTGACTCACCCTCCGTGGACGAACCTTGCGGAGGAACCCTTGGGTTTTCGGGGCATTGGA
>SRR492388.104181582
CTGCCGAAGCTGTGGGATGTCAAAATGCATCGGTAGGGGAGCGTTCCGCCTTAGGGGGAAGCAACCGCGCGAGCGGCGGGGGGCGGAGCCGGAGCGGGGGA
>SRR492388.104185062
ATGCCTCAGCTGCATACATCACTGCACTTCCACTTGACACCTATCGTAATGATAAACGGCTCCACTCTCCGGTGCCTTCTCTTTTATTCTTGAAACCTTTT
>SRR492388.104191342
AAAATGCTGAATCTCGTCTGAATCATCATTTGTCAGGACTATTCGGGGTAAGCTCATTGGCTTTGTCAGGGCATTTAGTTCCTGTTGCTCTTTCTGCCTTC
>SRR492388.104191832
ATACCCCGTAGGCTGAGGAGCAAAAGGAGGAATCCGCCCGAGGAGGGGCTCGCGTCTGATTAGCTAGTTGGGGGGGCAAAAGGCTAACAAGGCGATGAGAA
>SRR492388.104192652
TTGGCCTCTATGGTAGAATCAGTCAGGGGCCTGATAGGCGGTGGTTTACCCTGTGGGGGGAGGCCACGGGTCGGGGGCCCTTTATTTCCAACTCTGGGACT
>SRR492388.104194692
ATACCGGTGGCAGCTTCGAATAGATCATATACAAATTCTCGTTCTCTGAAAATATAGAAAAAGGGAGTCTGTGCACCAATATCTGCCATAAAAGGGCCGAG
>SRR492388.104203652
GTTAAAAAACTGGTACACCAAAACAAAAGAGTTGGTTGTCGAGCCGTATGAGGTAGGAAACTCTCAAGTACGGTTCTCAGGGAGGGAATTGATCAGCCTAT
>SRR492388.104205322
CATGCGTCTGAATTTCATATTTCCGTATGTGGAAAGAAGTATAAATATCACCATATACTAGACACTCACTAATGAGTACCGCATCTTCAAAATTGTATCCT
>SRR492388.104220422
AAAATAATAATAATAAACGATTAAATTATGGAAGTAAATATTCTTGCATTTATTGCTACTGCACTCTTCATTCTCGTTCCTACTGCTTTTTTGCTTATAAT
>SRR492388.104221372
GACGCCTGCCCAGTGCCGGAAGGTTAAGGAAGTTGGTGACCTGATGACAGGGGAGCCGGCGACCGAAGGCCCGGCGGACGGCGGGCGCAACCTAAACGGTC
>SRR492388.104225672
GCCTTGTACACACCGCCCGTCACACTATGGGAGCTGGCCATGCCCGAAGTCGTTACCTTAACCGCAAGGAGGGGGGTGCCGAAGGCAGGGACAATGAATGG
>SRR492388.104230702
AGGAGGGGGGTGCCGAAGGCAGGGCTAGTGACTGGAGTGAAGTCGTAACAAGGTAGCCGTACTGGAAGGGGCGGGTGGGGTGGACCCCTTTTACGGCGGGG
>SRR492388.104238422
GAAAAATATTGGAAAGGGAAAATGCTTCGAAGATGAACCTCTTCCCATGCGATAGTCAAAAATTCTTGGCGGTATCGAGCTGGAACAGCCTGTTCTTCTTG
>SRR492388.104238732
AATAGATAGACCTTTCTCTTCGTCTCAGGTCGATAGATCTTCTCAATTGGAAGATCCCCTATATGGATAAGACACATTCAAGTTGACCGAGCCTAATTCTA
>SRR492388.104243562
CTATCAAAGATATTATATACATTATAGAAGGGATAACGATAAAAAGAGGAAGAAGACGAGCTACAAGAAAAATACCCGCCGCTACCATAGTAGCAGCATGT
>SRR492388.104244142
GGGGAACAACAGCTGGAAACGGCTGCTAATACCCCGTAGGCTGAGGAGCAAAAGGAGGAATCCGCCCGAGGAGGGGCTCCCCGCTGGTTTGCGCGTTGGGG
>SRR492388.104245522
GCCCAAATAAGAACATCCATGCCCAGACTGATAAACTATTCATACCAAACGGGTTATATCCATTGATAAGTTGTGAAGAGTTTAACCATAGATAATCTCTT
>SRR492388.10424862
CGACTACGCCTTTCGGCCTGATCTTAGGCCCTGACTCACCCTCCGTGGACGAACCTTGCGGAGGAACCCTTGGGTTTTCGGGGCATTGGATTCTCACCAAT
>SRR492388.104253962
AAATCTTCTTCATGTAAAACCGGCTTGATTTAGATCGGGAGAATCGTACGGTTTTATGAAACCATGTGCTATGGCTCCCAACCCCAAGCAATCCCATTTTC
>SRR492388.104254352
AATTTTTGATAACTTAACTTATAAATCCACCTTTTTCCCTAATTAGAAGATGGATTCTGGCTGACTTTCTTGGATTAGTGTTAGACAGGGATACTACTATT
>SRR492388.104256362
AAAATCAAAATCGTGAATTTGTTTAAGACAGTATTAAGAATTTTATCGAAAACTTACAGCGGCTTGTCTAAAAAAGGGCAAGAGAAGAAAGAAAAAAAGGA
>SRR492388.104268062
AAAAAAATTATGCATCATTCTCATACCGGTGGCAGCTTCGAATAGATCATATACAAATTCTCGTTCTCTGAAAATATAGAAAAAGGGAGTCTGTGCACCAA
>SRR492388.104286732
AATATGAAGAAATAAAGAAGCCATTGCAATTGCCGGAAAGACTAGGCCTACTAAAGGCACAAAAATAGAGGGTAAGTTATTGAAAGATCGGAAGAGCACAC
>SRR492388.10428772
ATTAGAGAAGCTCCAATGGAAAAATATTGGAAAGGGAAAATGCTTCGAAGATGAACCTCTTCCCATGCGATAGTCAAAAATTCTTGGCGGTATCGAGCTGG
>SRR492388.104299732
CATGCCTTTCTTCGTTCATGGTTCGATATTCTGGTGTCCTAGGCGTAGAGGAACAACACCAATCCATCCCGAACTTGGTGGTTAAACTCTACAGCGGTGAC
>SRR492388.10429982
TCGAGAAGAGATGGGAAACATGCTCAATATCATTTGATTGAATAGTTGACCCAGCTCCTTGTTGTTTGCAGAAACCCTCCACTTCAAAGATCGGAAGAGCA
>SRR492388.104304292
TGAGTTAAAGATCTATATAATCTGAATCTGCTCTACTATTTTTGTGAATTTCTATTTAGATTTAGATAGGGATTCGAGATCGGAAGAGCACACGTCTGAAC
>SRR492388.10430552
CTTCTCTTTACAATGATAAATAACCTACTTAACTCAGTGGTTAGAGTATTGCTTTCATACGGCAGGAGGTCTTGGGTTAAATACAAAAATAGGGATAAACT
>SRR492388.104316932
AATCTCCTGCCCCAGGTATTATTTCGAGACGTTCTGTATATGAGCCTCTTCAAACAGGACTTATTGCTATTGATTCCATGATCCCTATAGGACGCGGCCAG
>SRR492388.104320882
CGGGTAAGTTCCGACCCGCACGAAAGGCGTAACGATCTGGGCACTGTCTCGGAGAGAGGCTCCGGGCAACAGACAAGTCTGTGGAGATGCCGGCTTCCTGC
>SRR492388.104335432
TTTTCGGATCGAGATGTATGGATCCATGGATCTATGTGTCTATATAGATCCTGTTCCTGGATTAACGAAAATGTGCAAAAGCTCTATTTGCCTCTGCCATT
>SRR492388.104335512
TATTAGATCTAATAAGTATAAGTTCCTTGTGTCAGAATTGAGAAATTCTATGGCTCCACACTTTTTTATTTTCTTTTTTTTTTTCTTTGTCTACTATTTTT
>SRR492388.10433822
CGCTGGCGGCATGCTTAACACATGCAAGTCGGACGGGAAGTGGTGTTTCCAGTGGCGGGCGGGGGGGGAACGCGGAAGAAACCGCCCTTGGGAGGGGGAAA
>SRR492388.104339092
TGGGAAGGGGTTTTGATTGATCAAAAAGAAGAATCTACTTCAACCGATATGCCCTTAGGCACGGCCATACATAATATAGAAATCACACTTGGAAGGGGTGG
>SRR492388.104339522
TCACAGACATGTCTATTTCACCGAGCCTCTCTCCGAGACAGTGCCCAGATCGTTACGCCTTTCGTGCGGGGCGGAACTTACCCGACAAGGAATTTCGCTAC
>SRR492388.104344552
AAATCGTCTAGTACGGAATCTTTTCAAGAAGTGATTGGTCTAACATAAAAAAAAAAAGAGGGGTAAGTTTCGTTTTTTTTTTAATTTCCTTGATAGATTGC
>SRR492388.104345032
CGCCATTTCAGAATCTCCTTGTTGAATGGCCTGTTCTCCACGGACGGAATAGGCGGATCAAAACCCTCCCTTAGAACCGTACTTGTGAGTCTCCTTCCTAC
>SRR492388.104347222
AGATCTTATCAACGTCCATGAATGAAAAATCATAGATCGAACTGCCGAATCGGAAAAATTGGGGGCTATCATATAGCTTTGTATCGGCTAAGGTCAGGAGT
>SRR492388.104358862
TTATCGACAAATGTCTCTTCTATTACGAAGACCGCCGGGTCGTGAAGCTTATCCAGGAGATGTTTTTTATTTACATTCACGTCTTTTAGAAAGAGCAGCTA
>SRR492388.104358922
ATGTAGATCCAACTTTCTATTCACTCGTGGGATCCGGGCGGTCCGGAGGGGACCACTATGGCTCCTCTCTTCTCTCGAAAACAAACATATCTTTTCAGTGT
>SRR492388.10436312
TCCTTTTTGCGTATGGCATCGCCACTCCCTTTGGCAGCATCCACTAATTCGGAACTTAATTTGAAAGCCATATTTCGACCCGGACGTTTTCGGGATGCCCC
>SRR492388.104366992
CGCCGGTCAGCCATACGGCGGTGAATTCGTTCCCGGGCCTTGTACACACCGCCCGGCACACCATCGGAGCTGGCCCCGCCCGAAGGCGGTTGCTTAACCCC
>SRR492388.1043762
CTGGAAACGGCTGCTAATACCCCGTAGGCTGAGGAGCAAAAGGAGGAATCCGCCCGAGGAGGGGCTCGCGGCCGGTTAGGTAGTTGGGGGGGCAAAAGCAT
>SRR492388.104377782
GCCCGAAGTCGTTACCTTAACCGCAAGGAGGGGGGGGCCGAAGGCAGGGCTAGTGACTGGAGGGAAGTCGTAACAAGGTAGCCGTCCCGGGAGGGGGGGGC
>SRR492388.104386272
GAGTTCACAATTACCGCGAGCAAACATATGAATTTAATGACTTAATGATGAGGAACGCATTTTTGCTATGCTACTAATACTTGCTCCGCTATTCTGCCCAA
>SRR492388.104386582
CCTGCCCAGTGCCGGAAGGTTAAGGAAGTTGGTGACCTGATGACAGGGGAGCCGGCGACCGAAGCCCCGGTGAACGGCGGGCCGGACTATACAAGTCCCAA
>SRR492388.104388272
CCTGGCTCAGGATGAACGCTGGCGGCATGCTTAACACATGCAAGTCGGACGGGAAGTGGTGTTTCCAGTGGCGGGAGGGGGGGGAACGGGGAAGAACCCGG
>SRR492388.10439352
TTACAAATTTCTACAAAATTGATTAGAATCTGATCTAACAACAGGGAATTTTCGGGAAATGCAAAAAGATGGAAGACTCTCTATAGATCTGCATCTATCTA
>SRR492388.104397072
TGATCTCGTAGTTCTTGGTCTGTGAAGATACGTTGTTAGGTGCTCCATTTTATTTTCCCATTGAGGCCGAACCTAAACCTGCGCTCGAGAGATAGCTGTCC
>SRR492388.10439902
ATTGAACTATCCATGTGGCTGAGAGCCCTCACAGCCCAGGCACAACGACGCAATTATCAGGGGCGCGCTCTACCACTGAGCTAATAGCCCGTCGTTCCTGG
>SRR492388.10442
CAAAACTTCTGTCACTCCATCCCCGCAGGGGCGGAGAACCCGTTGCTGTCTCGGCGGTGCTACCGGGGGGGCTGGGGGAGTCGGGATAGGAGGGCACCCAC
>SRR492388.104422312
TGGATGTTAAATACTATTGGATGGGTTACTTTTTATTGGCATTGGAAACACATCACATTATGGCAGGGGGGAGGTTCACAGATTTATATATTATTCTCCTT
>SRR492388.104425152
GAAAATTCCCCACTGCTGCCTCCCGTAGGAGTCTGGGCCGTGTCTCAGTCCCAGTGTGGCTGATCATCCTCTCGGACCAGCTACTGATCATCGCCTTGGTA
>SRR492388.104427662
AAGGGTAATTCCGCCTAGACAATAAAATATGTTGACATGCGGAGGAACATATTTACTAGTTATATCGTCTGCAATCGCCTGAATCTCAAGATCGGAAGAGC
>SRR492388.104432272
CGTTGGCCTCTATGGTAGAATCAGTCAGGGGCCTGATAGGCGGTGGTTTACCCTGTGGCGGATGTCCGCGGGTCGGGGCCGCCTTTTTCCCAACCGCGGAC
>SRR492388.104449482
CGCGTTAGCTACAGCACTGCACGGGTCGATACGCACAGCGCCTAGTATCCATCGTTTACGGCTAAGACAAAAGGGGGATCTAATCCCACTCGCTCCCCTCC
>SRR492388.104456112
TCTTATATGAAATCGGGAATTTCATTTTTTTTATTTGTTTTTGTTTTTGAGTCAATTTTCTTAGTTTTTATTGGCTCAAGGCTCTTAATTTTTTTTGTTTT
>SRR492388.104459142
CAACCGATATGCCCTTAGGCACGGCCATACATAATATAGAAATCACACTTGGAAGGGGTGGACAATTAGCTAGAGCAGCGGGGGGGGTTGCGGAAACGAGT
>SRR492388.104459742
AGAGGATAATCCGTATCTCTTCATCACATGTCAAGATAAAATATCTTGGGTGTATGTCAACTTGCTGAGTACATGTATAAATCCAATTAATTTCGTTCGAT
>SRR492388.104464252
TGCTTTCGACCATATTTCGATTGTTAATACGATATAGAAGGGCCGCTACTACAAATAGTACTACACCCTTGATCGTGAAATATCGATTGCTTTTTTGTCCC
>SRR492388.104465202
TCTTAGGCCCTGACTCACCCTCCGTGGACGAACCTTGCGGAGGAACCCTTGGGTTTTCGGTGCATTGGATTCTCACCAATGTTTGCGTTACTCAAGCCGAC
>SRR492388.104468992
TTCGAAGTAAAACATCCGAAACTTTTTTGAACAGGGGTGGTATTACACAACCCCCTTTTTTCACAAATTGTAAGTTACAGATATCTAATTTTTATATTAGA
>SRR492388.104471322
CGGAATAGGCGGATCAATTCCCTCCCTGAGAACCGTACTTGAGAGTTTCCTACCTCATACGGCTCCGAAACCAACATCTTTTTTTTTGTGTACCTGGTTTT
>SRR492388.104478612
TTGTCACTGCTTATGGACCCGAACCTGGGTGATCTATCTATGACCAGGATGAAGCTTGGGTGAAATTAGGTGGGGGTCCGACCCGCCGGAAGTTGAAAATT
>SRR492388.104478922
ATTGATTTTCTGTTACGATAAATTGACGAGACTATAGCTAATCCAATAGCTGCTTCAGCGGCTGGCAATTGTATTACAAAAAAGGAGAAAAATTTCCCCTT
>SRR492388.104479032
CTGCTGCCTCCCGTAGGAGTCTGGGCCGTGTCTCAGTCCCAGTGTGGCTGATCATCCTCTCGGACCAGCTACTGATCATCGCCTTGGTAAGCTATTGCCTC
>SRR492388.104485022
CTATATTTAAAATCTTTGTACAGTAGTTTTTTTAAGTATCTGATAGGTTCCCTAGCAACACTTTTTTTCGTTCTATTACTAATTTCATTGGATCCTGCACC
>SRR492388.104486512
AGGGTAGGTTGGAATCAACACATTGATTTTTTCACAATTTTTATTGAACCGTATGCACCAAAAGGTGCCTGTACGGCTCCTAAGGAATAAAAAATTATTCT
>SRR492388.104508052
TTGGGGGGATATGTAAAAGATATTCGTTCTTTTCCATCACTTTGGCATGTATAAAAAAAATATTGTGACATTTCATTTCTTAAGATCGGAAGAGCACACGT
>SRR492388.104511532
CCAGTGCCGGAAGGTTAAGGAAGTTGGTGACCTGATGACAGGGGAGCCGGCGACCGAAGCCCCGGTGAACGGCGGCGGGAACCATAACAGGACCAAGGGCG
>SRR492388.104512752
AGAGGAGGTAGGATGGTCAGTTGGTCAGATCTAGTATGGATCGTACATGGACGGGAGGTGGGGTCGGGGGGCCCCCCAGGGGTTCCCCCGCTGGGGGTTCT
>SRR492388.10451522
AAATAAAGAAAAGAGAGAGAAAATAAAGAAAAAATAAGCAAATCAAAATGAAGTAGAAGAACCCAGATTCCAAATGAACAAATTCAATCTTGAAAAAGACT
>SRR492388.104516802
TGTAATAAGTAAATGCCTCTTTTTCTCCGGAAGTTGTCGGAATGACTCGTAATAAGATATCGGCTAAAAATGTAAAAGGTTTTTTAATACAAATTTCCTTT
>SRR492388.104517292
ACGAGAGGACCGGGAAGGACGCACCTCTGGTGTACCAGTTATCGTGCCCACGGTAAACGCTGGGTAGCCAAGTGCGGAGCGGATAACTGCTGAAAGCATAT
>SRR492388.104517652
CGTTATGTATAGATGATGAGAAGATTCCATTGATACAGAGCCAATTCCAATAGACTTATTGGAGGGACCCATTGGGGATACTCCAAGCTGGACTTTAACAA
>SRR492388.104522152
TTAGGTTTATCGTTGGATGAACTGCATTGCTGATATTGACCCCAAAAAAGAAACGGTAGGTACAACTAAACCATGAACAACCAAACAGGCCACCGTAAAGA
>SRR492388.104532112
TGGCCTCTATGGTAGAATCAGTCAGGGGCCTGATAGGCGGTGGTTTACCCTGTGGCGGGTGGTAACGGTTCTGGGCCCCCTTTTTTCAAATCCTGGAATTT
>SRR492388.104533022
CTGCTAAATGGAAAGATCTTATCAACGTCCATGAATGAAAAATCATAGATCGAACTGCCGAATCGGAAAAATTGGGTGCTATCATATAGCTTTGTATCGGC
>SRR492388.104538802
CTAATGAAGGTTACAGATTCGGTCAAGAAGAATAAACTTACAACATTGTAGCTGCTCATGGTTATTTTGGCCGATTGATCTTCCGTTTCAACAATTCTCGT
>SRR492388.104540322
AATCAAGAAAGCCGCATAAGTGAATATATAACCTACAGAAAAGTGAGCTAATCCAACCAATCTTGCTTGCACGATTGAAAGAGCTACTGGTTTATCTTTCC
>SRR492388.10454372
CTTTTTAATTTTAACAAAAAAAGGCCCGGCTGGGGACTGACCAGGCCAGGCTATTAAAATAAAATAAAAAAGATCTTTTACTTGTGTTTTTGTTTTGACGA
>SRR492388.104550452
TGGTTAAATGCCAAAAAATCAAGTAAGCTCATTCGTCTTTATGTTGTGTTGATCGTTACAGGACTCTTGAATCTTCTAGCTTACTTATCTTTTTTGTCTTT
>SRR492388.104558102
TCTGAAGAAGCTTCCATCGAATTGGGATTATCTGTATTAAATGGATCAAACAAACAAATGAAATTGACAAAGTATGTAGATCGGAAGAGCACACGTCTGAA
>SRR492388.104558862
AAGCTTTAGCTAGTACACGGAAGTGCATACCATGATTCTTCTGTCTATCAATAACAGCGTGCATTGCACGGTGGATGTGAAGAAGTAGGCCATTATATCGG
>SRR492388.104559272
AACTTTCTATTCACTCGTGGGATCCGGGCGGTCCGGAGGGGACCACTATGGCTCCCCCCTTCTCGAGAATCCATACATCCCTTATTCGTGTATGGGCCCGT
>SRR492388.104561252
TGTTCCGAAAACAAAAAAAATTAAGAGCCTTGAGCCAATAAAAACTAAGAAAATTGACTCAAAAACAAAAACAAATAAAAAAAATGAAATTCCCGATTTCA
>SRR492388.104564362
TAGCCCACTTGTTTCTCGAGAAGAGATGGGAAACATGCTCAATATCATTTGATTGAATAGTTGACCCAGCTCCTTGTTGTTTGCAAGATCGGAAGAGCACA
>SRR492388.104569662
TAATAATAATATTAAGTATTAAGGCACATTCTTTTATTTTAATATAATATATTCGTAATTACTTTCTTGAAATTGATAGGTTGAAAATACACTTTAGAAAA
>SRR492388.104570472
ACCAATTAGAATTGCCTCCCAGAATCTACAATTGTGTGAAAAAATCCAATATACATACATTATTGGAGCTTTTGAATAACAGTCAAGACACCGTTCTCAAA
>SRR492388.104571812
TTAGTCAATTTTTTTTGAAATGTTTTTTCTATTTTTTTTCTATTTTTTTTCTAGAATGTCTAATATCTTTTTTACATCTTCTACGTGAAAATGTTCAATTT
>SRR492388.104573782
TAGGATGTAGAAGATCATAACATAAGTTATTCGGCAGATTTTGATTCCTATATATCCACTAGTGCGGAACATCTACCATATATAGTATAATTTTACGAAGT
>SRR492388.104573842
TCTTTTCGGATCGAGATGTATGGATCCATGGATCTATGTGTCTATATAGATCCTGTTCCTGGATTAACGAAAATGTGCAAAAGCTCTATTTGCCTCTGCCA
>SRR492388.104578972
AGTTGTCATTGATCAAGAAGGAAATCCAAAAGGAACTCGAGTTTTTGGGGCGATCCCACGGGAATTGAGACAATTAAACTTTACTAAACTAGTTTCATTAG
>SRR492388.104579342
TGGGGTCGGTCCATGGATTTTCCTTCCTTTTGCCGCATTTCGCTCAAAGGGTTGAAGGGAGATAGTGCATCAAGCTGTTCGCAAGGGCCAACTTGATCCTC
>SRR492388.104579732
TCATAGCTTTAATTTGAGCGGCGGATCCTACTCTCGAGACAGAAATCCCTACATTAATAGCAGGGTCGAATTCAGCATTAAAAAAAGCGTCGGAGAAGGAT
>SRR492388.104581642
GAGTCAAATCTTCTTCATGTAAAACCGGCTTGATTTAGATCGGGAGAATCGTACGGGTTTATGAAACCATGGGCTATGGCTCCCAACCTCCCTGAATGACT
>SRR492388.104585892
AGGCCCGGGAACGAATTCACCGCCGTATGGCTGACCGGCGATTACTAGCGATTCCGGCTTTTTGTAGGAGAGGTGCAGCCCGCCATCCCAACTTCGGACGG
>SRR492388.104586962
AATACCGGTACCGTACTTCAAGTGGGCGATGGCATCGCTCGTATTTATGGTCTTGATGAAGTAATGGCAGGGGAATTAGGGGGATTTGGGGGGGGGAGTCT
>SRR492388.104587902
TCAGCTGCATACATCACTGCACTTCCACTTGACACCTATCGTAATGATAAACGGCTCGACTCCCGGTGACCTTTCCTTTGATTTCCAAAAATTCTTTCACT
>SRR492388.104590332
AAAGGCCCGGCTGGGGACTGACCAGGCCAGGCTATTAAAATAAAATAAAAAAGATCTTTTACTTGTGTTTTTGTTTTGACGAGACAAAATAAAAAAAGGAT
>SRR492388.104592472
ATTACTATTATATAACTGTTTTTATAGAACTTTCTCAGCAATTCTAGTTACATTAAAAATTTAGCTAAAGATTAGATAAAAAAGGCGCGAACTCAAAAAAG
>SRR492388.104592552
TTGGTAAGGAATTGGAATGTAATAATATCGATTCATAATGGATTCATATCGATACAGAAGAAAAGGGTCTCTATCGATTCAACAAGTGCTGTACTTATGGG
>SRR492388.104595282
AGTATAGCATGGGTTACTTCAGCGCCGTAGCGCCTGGTACTCGAACATTGGCTCCGGGGCCTTTTTCTAACCCCTCTTCACCCGAAAAAACAAGCGCACAC
>SRR492388.104608752
ACTCCACCGCTTCGCCTAGCAGCACGACGCTTTTTTTGCTCTCCCACAACCCCGTTTTCACGGTTTAGGCTGCTCCCATTTCGCTCGCCGCTACTAACGGA
>SRR492388.104612582
TAAATACTATTGGATGGGTTACTTTTTATTGGCATTGGAAACACATCACATTATGGCAGGGGGGGGGAGTACCGTTTAATTAATCTTCCCCTTTTTTTTTT
>SRR492388.104612752
ACTGGAGCAGGCTACCACGAGACAAAAGATCTTCTTTCAAAAGAGATTCGATTCGGAACTCTTATATGTCCAAGGTTCAATATTGAAGATCGGAAGAGCAC
>SRR492388.104620102
TGAGTTTTTCTATTTTGACTTGCTCCCTCGCTGTGATCGAATAAGAATGGATAAGAGGCTCGGGGGGTTTACGGGAGGGGGGAGGGGGAGCTTTATTTTTG
>SRR492388.104628222
CATAGTGGTTAGTAGCTCATTTGGGAACTAGAAATTGAATTGACTTCAAATTTACTTAACGGGGGATTTTTTGCTTTTTTAATATTGGATTTGATAAATAT
>SRR492388.104628712
CAAGGCTGCTCCTGTATAAGGCGCGAGGTATTGTAACGTAGCTGGGGAATCGGCCGGTTTCGGTACCACAAAAGTGTATTCCATTGCACCCCGGTTCCGTA
>SRR492388.104639442
ACTGGTTTATGGATGAGTGCTCTTGGAGAAGTCGGTTTAGCTTTGAACCTACGTGCCTATGGCTCCGTTTCCCAGGAAATCCGTGCGGAGGGAGACGCCAA
>SRR492388.104640242
GCAGGATTCATCATGACAGGAGCTTTTGCTCATGGAGCTATCTTTTTTATTAGAGATTACAATCCAGAACAGAATGAGGATAACGAGATCGGAAGGGCACA
>SRR492388.104640592
TTAGAGAGAGTTGTCTCGCGCCCCTAGGTATTCTCTACCTACCCACCTGTGTCGGTTTCGGGGAACAGGAACCCTTTTTTGAAGGGTGGTTCGTGCTTTCC
>SRR492388.104648402
AATCATGGCTTCAGATATCAATTAAATATTTCCATATTGATGCATCCGAGATGACAATGTAATGTGATCGAAGGTGTATGAGATCGGAAGAGCACACGTCT
>SRR492388.104651592
ATCATTTGATGATGCCATGTGAATCGCTAGAAACATGTGAAGTGTATGGCTAACCCAATAACGAAAGTTTCGTAAGGGGACTGGAGCCGAGATCGGAAGGG
>SRR492388.104654272
ACCAGAGGTTTAGATTGTATCAATCTACCCTTGTGTGATTCCTGTTGAATCATATACTGCGGGGCGCAGGGCGGACGATTTCAAAGCGGACTCCCCCTCCC
>SRR492388.104657392
CTAAATGGAAAGATCTTATCAACGTCCATGAATGAAAAATCATAGATCGAACTGCCGAATCGGAAAAATTGGGTGCTATCATATAGCTTTGTATCGGCTAA
>SRR492388.104660292
AAAAAAATTAACGAGTTAATTTTTCTTACGAGTTTGTGATTGTTCCAGAAGAAATGAAACAAAAGATACGGTAGAGCTAGGACAGTTCGATCTTTTTCAAC
>SRR492388.104667072
GAGCCAATAAAAACTAAGAAAATTGACTCAAAAACAAAAACAAATAAAAAAAATGAAATTCCCGATTTCATATAAGAGCTCCATTGTAGAATTCGGGCCTA
>SRR492388.104667932
TCTAGTTATTAACATCAGAAAGGGGTGAAAAATTTAGAGATACAATCAACAATCGGGGACTAACCCCCCCACCCTTTTTTATTTTAAAAAAAAAATAAAAA
>SRR492388.104674692
GGGCGGTGTGTACAAGGCCCGGGAACGAATTCACCGCCGTATGGCTGACCGGCGATTACCAGCGAGTCCGGCTTTAAGCAGGGCACGTGCTAACCCCCATA
>SRR492388.104675792
AGGATGAACGCTGGCGGCATGCTTAACACATGCAAGTCGGACGGGAAGTGGTGTTTCCAGTGGCGGGCGGGGGGGGAAAGCGGAAGAAACCGCCCCTTGGG
>SRR492388.104681702
CCTCCCGTAGGAGTCTGGGCCGTGTCTCAGTCCCAGTGTGGCTGATCATCCTCTCGGACCAGCTACTGATCATCGCCTTGGGAAGCTATTACCGCACCCAC
>SRR492388.1046842
CTTTTTGAAATATCACGGATCAGTACCTATGAATAAAATAGAATGGACGAACTCGATTCATTATTTACAAAATATAGATCAGATCGGAAGAGCACACGTCT
>SRR492388.104685962
ACCTGTTGTCCATCGACTACGCCTTTCGGCCTGATCTTAGGCCCTGACTCACCCTCCGTGGACGAACCTTGCGGAGGAACCCTTGGGTTTTCGGGGCATTG
>SRR492388.104687412
TGGCGGTATCGAGCTGGAACAGCCTGTTCTTCTTGAATGCCCCGATTAAGAGCCAAAGAATTTCCTGCCGCTATCATATAATATTCATCTTGACTTGGTGA
>SRR492388.104691342
GTTTGCTTTTGGTCTAGATCAACTTAAGTTAAATATAGTCTCTAACATCCTGATTAAAAAATCAAACATGAAACTTGATACACCTTAAGGTTAATAGGACG
>SRR492388.104694652
TAGGAGTCTGGGCCGTGTCTCAGTCCCAGTGTGGCTGATCATCCTCTCGGACCAGCTACTGATCATCGCCTTGGTAAGCTATTGCCTCACCAACTAGCTAA
>SRR492388.104708782
TGACCAGGCCCGGGCGACTGTTTACCAAAAACACAGGTCTCCGCAAAGTCGTAAGACCATGTATGGGGGCTGACGCCTGCCCAGTGCCGGAAGGGTAAGGA
>SRR492388.104710502
TGTTATATGGGTCGTGAGTGGGAACTTAGTTTCCGTCTGGGGATGCGTCCTTGGATTGCTGGTGCATATTCAGCTCCTGTTGCAGCTGCTTCTCCGTCTTT
>SRR492388.104712122
GAGAGCCCTCACAGCCCAGGCACAACGACGCAATTATCAGGGGCGCGCTCTACCACTGAGCTAATAGCCCGTCGTACGGGCACGCGACAGGCGCGTGCTGC
>SRR492388.104714882
AATAGGCGGATCAATTCCCTCCCTGAGAACCGTACTTGAGAGTTTCCTACCTCATACGGCTCCCCCACCAACCCTTTTTTTTTTGTGTAGCAGTTTTTTTA
>SRR492388.104715052
CAGAGTAATTATGCTGGAATTGAGTCGTATAGCTTCTCATCTGTTATGGCTCCCCCCCCTTTTTGGAGGGGTTTTGGGGCAGGACCCCCTTTTTTTTTTTT
>SRR492388.104715602
AAATTCCTTGTCGGGTAAGTTCCGACCCGCACGAAAGGCGTAACGATCTGGGCACTGTCTCGGAGAGAGGCTCCGGGGAAAAGAAAAGTCTGTGGAGATGG
>SRR492388.104718342
GCCGAAGCTGTGGGATGTCAAAATGCATCGGTAGGGGAGCGTTCCGCCTTAGGGGGAAGCAAACGCGCGGGCGGCGGGGGGGGGAAAGGGAGCGAGGACGT
>SRR492388.104718932
TGGTATTTCTTTCCTGTATTTCAAATACTTCGTACAGTGCCTAACAAATTATTGGGTGTTCTTTTAATGGTTTCAGTACCAGCGGGTAGTTCGGATGTTGC
>SRR492388.104721542
CTAGTATTTGCGGTGAATCCCCCTGTTAAGTAGTCATGCATTACGATAGGAACTCCCAATTCTCTGGCAAATACAGATCTTTTGATCATGTCTTAGGATGT
>SRR492388.10473132
AAGGTGTCTATAACTTCTCCCCCAGGACCTACCCCCCATCCTAAAGTGGCTAGGGGGGGGAGTAAAAATAAAACTTGTTTATAACTGGGGTTTTTTGGTAA
>SRR492388.104732032
GGAAAATGGATATCCCCTGAAAATATTTTGAGTTCAATCCTTTTTTTTTTTTTCTCTACTCGAATTAACCCCCCGACTTGGCTTCTTGATTTTAAAGGAAG
>SRR492388.104734242
TTCCGGAACTCTTTCTTCGGTATCTAGGATCATCAAAAAAAGCAAAAATACTATTTCTACGGAAAATACATTTAATGGGAATTCCACCGAGGTACCTGACC
>SRR492388.104761322
GGATGTTAAATACTATTGGATGGGTTACTTTTTATTGGCATTGGAAACACATCACATTATGGCAGGGGGAGGGTTTTCAGTTTAATGAAAATTCCCCCTTT
>SRR492388.104769052
GAAAGAAGGCTTCCACCTCCAAGTTTAACTCAGACGTAGCTCCCTTCTTTTTGGGTGTGAAGCTGTGTCAAACCTAAATACCCAAGAAGCATTAGCTCTCC
>SRR492388.10476912
AGCTGTGGGATGTCAAAATGCATCGGTAGGGGAGCGTTCCGCCTTAGGGGGAAGCAACCGCGCGAGCGGCGGGGGGCGGAGGGGGAGGCAGGAAGGCGGGC
>SRR492388.104771152
TGCCTCAGCTGCATACATCACTGCACTTCCACTTGACACCTATCGTAATGATAAACGGCTCCTCTCCCCCCGACCCTCTCTTTAATTCTCCAAAATTCTGT
>SRR492388.104771902
TTGACCAATAGCTACATAAACACATATTACATTTTGGCCTTGTTGATTGAGAATTGTATCTGTGGCTAACGCCGTTTTTCCCGGCTTGCTGTGCACAATAA
>SRR492388.104780822
GATTCAATACATTTCTTATGTACCCATAGGGACTATATTGGAATTGGATTTGAATCATATTTCGGATCAATCTATATTGATTGACTGACTCCATTATGTTG
>SRR492388.104781582
AATGCCTCTTTTTCTCCGGAAGTTGTCGGAATGACTCGTAATAAGATATCGGCTACAATTTTAAAGGGTTTTTCAATAAAAATTTCATTTATAACAGATCT
>SRR492388.104783342
GGGATTTTCCTTGAGGGATATTGGTAAGGAATTGGAATGTAATAATATCGATTCATAATGGATTCATATCGATACAGAAGAAAAGGTTCTCTATCGATTCA
>SRR492388.104784852
AGACATTTGTCGATAAGCTTGTGCTTGTTTGGAAAGATCATCATAAATTATTAAAGTGTGTTGTTCACGGTACATAAAATATTCAGCCAAGGCTGCTCCCG
>SRR492388.10478632
TGAATCGGAATCTTGGGGAGTACTGTCTGATCATTTCTACTAATTTAAAGCCCCAATTAACCTTCTTTTTTTTATCTTATGAGATCGGAAGAGCACACGTC
>SRR492388.104790592
GTACTTCAAGTGGGCGATGGCATCGCTCGTATTTATGGTCTTGATGAAGTAATGGCAGGGGGATTAGTAGAAATTTAGGGGGGGGCTATAGGGTTTGCCCT
>SRR492388.104791272
TGTCCATCGACTACGCCTTTCGGCCTGATCTTAGGCCCTGACTCACCCTCCGTGGACGAACCTTGCGGAGGAACCCTTGGGTTTTCGGGGCATTGGATTCT
>SRR492388.104801942
GTTAGCACGGTTAATAATATCAGCCCAAGTATTAATAACACGTCCTTGACTATCAACTACTGATTGGTTGAAATTGAAACCATTTAGGTTGAAAGCCATAG
>SRR492388.104807592
TCTGTAATAAGTAAATGCCTCTTTTTCTCCGGAAGTTGTCGGAATGACTCGTAATAAGATATCGGCTACAATTGGTAAAAAGTCCACAAAAAAAATTCCTT
>SRR492388.104809912
TACAATGTTGTAAGTTTCTTCTTCTTGCCCGAATCTGTAACCTTCATTAGCAGATTCATTTTCTGTGGTTTCCCTGATCAAACTAGAAGTTACCAAGGAAC
>SRR492388.104820012
GCACTCCACCGCTTCGCCTAGCAGCACGACGCTTTTTTTGCTCTCCCACAACCCCGTCTTCACGGGTTAGGCTGCTCCCATTTCGCCCGCTCGTACTCACG
>SRR492388.104821822
TACTTCAAGTGGGCGATGGCATCGCTCGTATTTATGGTCTTGATGAAGTAATGGCAGGGGGATTTGGAGGATTTTTGGGGGGGGACATAGGGGTTGTCCTT
>SRR492388.1048392
CTAAGCCAATTCTTATGAAATCTTGAATCAAACCCTTTGTACTTACTTCAACAAAGAAAGCACGGACCTCCTCAGATCGGAAGAGCACACGTCTGAACTCC
>SRR492388.104841922
TTCACATTTGGAATTGCACAGAAAAGATTATTTATCTCAGCGGGGTCTACGAAAAATTCTGGGAAAACGTCAACGACTGATGGCTTATTTGTCTAACAAAA
>SRR492388.104852992
TATTCTTGAACAACTTGGATTGGAGCCGGGCTTTCCTTTCGCACTTTATACGGGTATGAAATGAAAATAATGGAAAAAGTTGGATTCAATTGTCAACTACT
>SRR492388.104856512
CAGCCGCGGTAATACAGAGGATGCAAGCGTTATCCGGAATGATTGGGCGTAAAGCGTCTTTAGGAGGCGTTTTAAGTCCGCCGTCAAATTCCAGGCACCCC
>SRR492388.104861792
GCCCTTGTTGACGATCCTTTACTCCGACAGCATCTAGGGTTCCTCGAACAATGTGGTATCTCACACCGGGTAAATCCTTAACCCTTCACCCTCTTCCTAAG
>SRR492388.104862972
GCACCTGGACAGAAAGACCCTATGAAGCTTCACTGTTCCCTGGGATTGGCTTTGGGCTTTTCCTGCGCAGCTTAGGTGGAAGGCGAAGAAGGCCCCCTTCC
>SRR492388.104864982
AAAAGGGCCAGCTATATCAGAGTAATTATGCTGGAATTGAGTCGTATAGCTTCTCATCTGTTATGGCTCCCCCCCTTTTTTGCACGTGTTGGTGGGGAGTG
>SRR492388.104874322
TAATAATATCAGCCCAAGTATTAATAACACGTCCTTGACTATCAACTACTGATTGGTTGAAATTGAAACCATTTAGGTTGAAAGCCATAGTACTAATACCT
>SRR492388.104881412
AGAAGTAACGATTGTAAATACCGGTACCGTACTTCAAGTGGGCGATGGCATCGCTCGTATTTATGGTCTTGATGAAGTAATGGCAGGGGGCTTTGTCTGGT
>SRR492388.10489112
TTATTCCGCCATCCTGTCCAATGAATTACTAAGATTTATTTTTCAATAGAATCCTCTATATTCATGGGTTCCGTCGTTCCCATCGCTTCTTGATTAATCAT
>SRR492388.10489612
TGATCTTAGGCCCTGACTCACCCTCCGTGGACGAACCTTGCGGAGGAACCCTTGGGTTTTCGGGGCATTGGATTCTCACCAATGTTTGCGTTACTTACGCC
>SRR492388.104896412
TTTTTCGATCTTCCCATTCATTCCCCGTAGGCCCTTCTTCTCCTAATTGTTTCCATTCTACCAACGAATTTTCTATAATAATTCGCAAATCTAAATCGGCT
>SRR492388.104900332
CGGTACCGTACTTCAAGTGGGCGATGGCATCGCTCGTATTTATGGTCTTGATGAAGTAATGGCAGGGGGGTTAGTAGAATTTGTGGGGGGGGCGATACGGG
>SRR492388.104901932
TTAGTCCCAATCCCAACGAAGAAGAAGAAAGAAAGGGAATCATTTTTAAGAAAGTTTTCGTGTTGTTGATTTCTCGGCGTAGTGCTTCTTAGATCGGAAGA
>SRR492388.10490922
TGGATAGATACCTTTGGCAGCTAATCCTCTTGATAGTACGGTAGTCGCATCTAAATGTGCAAATGTGGTGGCAGGTGGGGGGGGAGGCGAAATATCTTGAG
>SRR492388.104924482
AAGATGCCATTCATTTGATGAGAAATAAAAAGGAATATCGAAAATTCGAGTGGCTGAAGCTGTACTCGGTTCTTTCGAAGTAACAGAAAGAAAACTGACGA
>SRR492388.104932992
CAATCAGATTTATTTTTGATCAAAAAAAAAAAAAAAATCACTATGTGAAATCTTCGTTTTTTTTTTTTTTTTTCTCTTTACCTTTCCCATAAGTACAGACT
>SRR492388.104953022
GGGCCAGCTATATCAGAGTAATTATGCTGGAATTGAGTCGTATAGCTTCTCATCTGTTATGGCTCCCCCCCTTTATATCCGGAAATAGATGGAACGCACCC
>SRR492388.104953942
GAAGATACGTTGTTAGGTGCTCCATTTTATTTTCCCATTGAGGCCGAACCTAAACCTGCGCTCGAGAGATAGCTGTCCATACACTGATAAGGGGTGTATGG
>SRR492388.104954312
CTCCAATACGAAAAAAATTATGCATCATTCTCATACCGGTGGCAGCTTCGAATAGATCATATACAAATTCTCGTTCTCTGAAAATATAGAAAAAGGGAGTC
>SRR492388.104955842
CCGGTGGAGCGGTGAAATGCGTAGAGATCGGAAAGAACACCAACGGCGAAAGCACTCTGCTGGGCCGACACTGACACTGAGAGACGAAAGCTAGGGGAGCG
>SRR492388.104956462
TTAATTAACTCCTATTTTTTTAAGACGAAGAAAGAAATTCGATTTTCTCTCCTATTTACTACGGCGACGAAGAATCAAAAGATCGGAAGAGCACACGTCTG
>SRR492388.104961192
TGAAGTTTAGTTATTTGCTACAGCTGATAAAAATCGTTTTAGGCGATGCTTATGTAGAAAGCCCTTTTTTTGTGTTTCTAGTATTTTATTGACTAGCGTTC
>SRR492388.104962282
TCCTGGCTCAGGATGAACGCTGGCGGCATGCTTAACACATGCAAGTCGGACGGGAAGTGGTGTTTCCAGTGGCGGGCGGGGGAGGGACGCGTGAGGACACG
>SRR492388.104965022
GGTCCTGACACAAGGTTAGAATTCTAGCTCTTCCAGAGTGGTATCTCACTGATGGCTCCCCGCCCCCCCCACGGGGGGGCGACCCCGCCACCCCCGCACCC
>SRR492388.104969162
CTAAAAAGTGAATTTTTTTGGGGGGGAAGTTCAAATTAGACTAGACAAACAAAAAAAAGTTCATTTTCCTCCCTTGCTTGCATATGTATAGATAATTCAAA
>SRR492388.104971252
GAGGCTCGGTGAAATAGACATGTCTGTGAAGATGCGGACTACCTGCACCTGGACAGAAAGACCCTATGAAGCTTCACTGTTCCCTGGGATTGGCTTTGGGC
>SRR492388.104973812
CATTTCAATTTCAAATTGACTTTTTAGTCTTAGTCAATTTTTTTTGAAATGTTTTTTCTATTTTTTTTCTATTTTTTTTCTAGAATGTCTAATATCTTTTT
>SRR492388.104980882
AGCTGCATACATCACTGCACTTCCACTTGACACCTATCGTAATGATAAACGGCTCCGCTCCCCGCGACCCTTTCTTTAATTTTTCAAACTTTTGTCACTCC
>SRR492388.104981792
AATACCTATAGTACCCTCCTCAAATTCTACTAATTCACCTGCCATTACTTCATCAAGACCATAAATACGAGCGATGCCATCGCCCACTTGAAGTACGGTAC
>SRR492388.104986552
AAATCAGAATTATTGAGACGGGCCTTTTCCACATAAAAAGGGAATCTTTTGTTACAATAGAAACAGAAGTGATGTGGATAGATCGGAAGAGCACAAGGCTG
>SRR492388.10500632
TTACGACGAAACCTAGAAATCGATCACTGATCCAATTTGAGTACCTCTACAGGATAGACCTGAACAGGAAACTGAAGAGTAACGGCAGGAGATAAAATTGG
>SRR492388.105018952
CCTCAGGTTCGTCGGGGTAAATGCATTAAAAAGGGACAAATTTTAGCGGATGGGGCTGCTACAGTTGGTGGGGGAATCGCTTTTGGGGAAAAAATATTTGG
>SRR492388.105020292
CGATTAGGGTCGTATTCTATGGTTACGATTCTACCATATATGTCTTTTGCATTTCGTCGAAAATCTATTTTACGGTATAGACGCTTATAGATCGGAAAAAC
>SRR492388.105024312
CGATGCCCGAGCGGTTAATGGGGACGGACTGTAAATTCGTTGGCAATATGTCTACGCTGGGATAAATCCAGCTCGGCCCAATAATTAACATTCTACAAAAA
>SRR492388.105033142
CATTTTATGAACTCTTTGAGAAATCAAAAAAAGCACGGATACGGATGCTTTTTTTTTTACTGAAGTAAGAGGAAAGATCGGAAGAGGACTCGTTTTTTTTC
>SRR492388.105034532
GTTCCTCTACGCCTAGGACACCAGAATATCGAACCATGAACGAAGAAAGGCATGCGAGAAAAGCATATAGGCTAGGGATTGGGTGGCTCCAAACTTTGAAT
>SRR492388.105038862
TCTTGTAAAGTACCCATTTCGGTACTAAGGGTGGGTTGATAACCCACAGCAGAAGGCATTCTACCCAATAAGGCGGGTACTACGGGTCCTGGTTGTATGTA
>SRR492388.105041202
GATTCCACTGACCCGTAAAAAGTGGGCCTAACCCTTGGGGATGCGGTAATACATTTAAGAAATTATTCCATCGAACATATTCCCCCCTGGATGCAGGAATA
>SRR492388.105049732
TCCTGGCTCAGGATGAACGCTGGCGGCATGCTTAACACATGCAAGTCGGACGGGAAGTGGTGTTTCCAGTGGCGGGAGGGGGGGGAAAGCGGAAGAAACCG
>SRR492388.105075572
GTGCCGAAGGCAGGGCTAGTGACTGGAGTGAAGTCGTAACAAGGTAGCCGTACTGGAAGGGGGGGCCGGGGGCACCCCCTTTTTCGGGGGGGCAAATAGTT
>SRR492388.105080472
CAGGGTCAGGCGCTGATGAGCACATTGAACTATCCATGTGGCTGAGAGCCCTCACAGCCCCGGCACAACGACGCAATTATCAGGGGCGCGCTCTACCACTG
>SRR492388.105084102
TCACTCACCGGTATCTGAGCAATTTTTCCCGTAGCTTTGACTGAACTTCCTTCTTGGATCATCAAACCGTCACCCATTAATACAACACCAACATTATTGGA
>SRR492388.105085052
ACACCCAAGATATTTTATCTTGACATGTGATGAAGAGATACGGATTATCCTCTGAACAATAATTTTCTAAAAAAAAAAAAAAAAAAAAAAATTTTTTATAA
>SRR492388.105087982
TCTTCCGAAAAAAGAGAAGGAAAAGGAGCTTCTTCGGTGGATACCTCTTGGTCCTGTTTAGTCCCACCCGTTTCTGAGGTTCCTTTAAGTTTCTTAGTAAA
>SRR492388.105104852
TACAAGGCCCGGGAACGAATTCACCGCCGTATGGCTGACCGGCGATTACTAGCGATTCCGGCTTCCTGTCAGCGCGTTGCAGCCCTGGACACAGACCAAAG
>SRR492388.105116372
CAAATACAAATATATATCAAATATAAAAATTGATCCTTAAAATATGAAATAGTATTCAATCAAATTTAATTGAATGAACGGAAAAAATCATAACATACACA
>SRR492388.105116382
CAAATACAAATATATATCAAATATAAAAATTGATCCTTAAAATATGAAATAGTATTCAATCAAATTTAATTGAATGAACGGAAAAAATCATAACATACACA
>SRR492388.105125482
AGGAAAACCTTCTTTGGATTTGCCCAAGATTTTTGGAATTCATTTATTTCTTTCAGGAGTGGCTTTTTTTTTTTTTTGTGCGCTTTATGTAACAGGGATAT
>SRR492388.105133022
TCTTGGATTTTATAAATAAAAGAAGACTTTCTAAGTTTGAAAATGAAAAATGATATAGATTAGATCGGAAGAGCACACGTCTGAACTCCAGTCACTAGCTT
>SRR492388.10513522
ATAGAGCCATTGCAACACCCATCAAAGGGGTCGTTCCCCATCCGGGAGCTACTTTACCATATTCGGAATTCAATGGTTTCAATAACTTCCCTACAGTAGTG
>SRR492388.105140582
TATGTCACCATTAGTAAAAGCAAGATGATACTTCAGTAGATGATACCTCAGTAATGGTCGGAATAGCTTAATTGCGGGGGACTGAAACACCATTTTCTACA
>SRR492388.105144112
GAGATAATTGTCTCTTCAACACAGCTGCATCCCTTTTCGGAAGACGGTTGAATCCCTCTGTCTTTTGTTCAGTTCTCAAGTCCCTAAACTTATGAAGTCTT
>SRR492388.105144182
TTATTAGAAATACAAGACAGCCAATCCGAAACGTCACGAAATCCCCAGCGCTTCGGGGATGCCCTCAGCGACGAGGAACATGAGATCGGAAGAGCACACGT
>SRR492388.105146152
ACATGTCTGTGAAGATGCGGACTACCTGCACCTGGACAGAAAGACCCTATGAAGCTTCACTGTTCCCTGGGATTGGCTTTGGGCTTTTCCTGCGCAGCTTA
>SRR492388.105165582
GGAACAAGTTGATAGGATCCCCTTTTACGCCCCCATGTCCCTCTCGTGTGGCGGCAGGGGGGCGGAAAAAGGAAAGAGAGAGATGGGGGTTCTCTTGCTTT
>SRR492388.105198302
AAATAGGATCACTTCTTATGGATTCGTTGAGAATGATTCGGATCTAGTTCATGGCCTATTAGAAGTGCAAGGCGCTTTGGTGGGATCAGATCGGAAGAGCA
>SRR492388.105203762
GGATGCTTTTTTTATCACCAAGTCAAGATGAATATTATATGATAGCGGCAGGGAATTCTTTTGGTTTTTATTGGGGGGTTCGAAAAGAACCAGCTGGTGCC
>SRR492388.105206092
GGAAGGGGGCCTTCTTCGCCTTCCACCTAAGCTGCGCAGGAAAAGCCCAAAGCCAATCCCAGGGAACAGTGAAGCTTCATAGGGTCTTTCTGTCCAGGTGC
>SRR492388.10521052
ATCTATTTTCATAGTTCAACTCTTTGACAACACGAAAAAACCATTGTTCAACTCTTTGACAACATGAAAAAACCTAAAATTCTGCCCTTCTATCCAAAGGA
>SRR492388.105216332
[truncated: 208,321+ more rows]

## Sheet: WS-2
FASTA format	Assigned as rearrangement by BLAST+ analysis
>SRR492407.100001902
TTTTATTGGTATATCAAATTCATTTCTTCTTTTTTTCTCATATCAGATAACAAAGATATAATTAAAAAATTTACTTTTTTTTTTTTATTCTCTCAATTTTT
>SRR492407.100004392
ATAAAAAAAATTTCCATATCATAAACCATAAGTCCTGGGGATCGTTCAGAATAAAACGGAAAATTTAATTTTATTTCAATGGAGCCAATCACTATCTATCG
>SRR492407.100004882
ACACCAGAATATCGAACCATGAACGAAGAAAGGCATGCGAGAAAAGCATATTGGCTAGGGGTTGTGAGGCTCCAAATCTTTTATGGGGTGGACAACACAAG
>SRR492407.100007452
TTTTCCTGGGAGTATAGCATGGGTTACTTCAGCGCCGTAGCGCCTGGTACTCGAACATTGGCTCCGGGGCTTTTCTCTTCCCCTTTCTTCCCTGAAAAAAA
>SRR492407.100010532
CAGAAATAAGAACTTTAAATTATTTTGATTCAAGACCCCCCCCTTTTTTTTTTCCTTTTTTCTTTAAATTTTTTTTTTTAGTTTTGGATCCCAATTAAAAA
>SRR492407.10001222
TGTAAATACCGGTACCGTACTTCAAGTGGGCGATGGCATCGCTCGTATTTATGGTCTTGATGAAGTAATGGCAGGGGGGTTAGTATAATTTGTGGGGGGGG
>SRR492407.100012852
CCCCCCCGGAAGGGGGCCTTCTTCGCCTTCCACCTAAGCCGCGCAGGAAAAGCCCAAAGCCAATCCCAGGGAACAGTGAAGCTTCATAGGGTCTTTCTGTC
>SRR492407.100013062
CTTAACCGCAAGGAGGGGGGTGCCGAAGGCAGGGCTAGTGACTGGAGTGAAGTCTTAACAAGGTAGCCGTACTGGAAGGGGGGGGCGGGGACACCCTCCTT
>SRR492407.100015502
GATACTTAACGCGTTAGCTACAGCACTGCACGGGTCGATACGCACAGCGCCTAGTATCCATCGTTTACGGCTAAGACTACTCTGGGAGGTAATCCCCCTAC
>SRR492407.100018692
AGCGTTCATCCTGAGCCAGGATCGAACTCTCCATGAGATTCATAGTTGCATTACTTATAGCTTCCTTCTTCGTAGACAAAGCTGATTCGGAATTGTCTTTC
>SRR492407.100021142
TAGAGTCCAATAAGCATATCTTGAGTCGGTACCGAAATGGGATCTCCAATAGCTGGAGATAAGAGATTCATATGAGAAAACATAAGTAAACGAGCCTCTGC
>SRR492407.10002152
CCGGGAAGGACGCACCTCTGGTGTACCAGTTATCGTGCCCACGGTAAACGCTGGGTAGCCAAGTGCGGAGCGGATAACTGCTGAAAGCATCTAAGTAGTAA
>SRR492407.100021592
AATTTCATATTGAATTCGAAGTGCCATGCTATTATTACTTAACTAATTCATATTTCAAATGGCGAAGGCATAGTATTTTTTTCTCGAAAATAAAAAAACTC
>SRR492407.100022862
GGGTATCTAATCCCATTCGCTCCCCTAGCTTTCGTCTCTCAGTGTCAGTGTCGGCCCAGCAGAGTGCTTTCGCCGTTGGTGTTCTTTCCGATCTCTACGCA
>SRR492407.100025192
GCTGTTGAACAAGCTATTATTGCAAAAATTGGCGAAAATAACAAACTATCATTAAGAATTTCATCTTTCGACCAAAAACAAGCAAGGGGGGGGAGATGGGA
>SRR492407.10002562
GCAAGATGATCCTTCGGTAATGGTCGACATAGCTTAGTTGCAGAGGACTGAAAATCCTTATGTCACCATTAGTAAAAGCAAGATGATACTTCAGTAGATGA
>SRR492407.1000272
TTCATCTGCCCCTGAGGAATTGCCAAACCATCTGACTCTTCACACATTCCAATATGAAGGGTTAGTCAATCAAATAATAGATAGGAAATGCGTCGGTTTGA
>SRR492407.100027462
CTCACAAATTGCGAATACTAATTTGTTAAGAATGAATCGAATTGAAGCTATAGCGTCATCATTTGCGGGAATAGAAATATCCCCGAGATCGGGATTACAAT
>SRR492407.100031322
AACGGGAGATTAGATCTCATAGAGTTCAATTCCCGTTCTCAACCCATGACCAATATGAACTCGAAGTTTCCTTCGTAACCCCCGGACCTTCTTCGTCGTGG
>SRR492407.100034582
GCTGAGAGCCCTCACAGCCCAGGCACAACGACGCAATTATCAGGGGCGCGCTCTACCACTGAGCTAATAGCCCGTCGTTCCGGGCCCCGCCCGGCGGGCCC
>SRR492407.100035382
TACCTTTTTTTATTTTTTATTGAAATTTGTATTTTTTTTTTTTTTTTAGACAATACAAAAAAAAAAAGATAGTAACGGGGGGGGGGGGGGAGCCACAGGGG
>SRR492407.10003632
AAAGGTCAAAAAAGTCAATTCCATTGTGGAGCCGTATGCAATGCACAAAAAAAGCCTGTACGGTTATTCAAATTTATCTATTTTTTTTTGTTATCCCGTCT
>SRR492407.100036302
TACCTTTACGCTTTGCAGAAATATAAGGTGCCATTCTAGGATTCCATTTCCTCGTACCATGTCCAAAATGAACTCCTGCTCTCATCATCTCTTCCAAATCG
>SRR492407.100037222
CTTGTTCCGACCTAGGATAATAAGCTCATGGGTTTGGTCTTACTTCACCGTCGAGAAACGAAAGAAGGCTTCCACCTCCAAGTTTAACTCAGACGTAGCTC
>SRR492407.100037362
ATTAGGAATAGGCAAGCCTTTGTTTTATCTAGCGAATTCGAAACGGAACTTTAGTTATGATTCATTATTTCGATCTCATTAGCCTTTTTTTTCGTATTTTC
>SRR492407.100040802
TAACGGAGTTGAAGTTACCAAATTCTGAGGAGTAGGTATCAATTTATGCCTAATTGCTCCGGAGATAGTTCCCTTAACTACATTTTCTAAACGAGCCAGAG
>SRR492407.10004172
ATCGTTGGCCTCTATGGTAGAATCAGTCAGGGGCCTGATAGGCGGTGGTTTACCCTGTGGCGGATGGCAGCGGGTCGGGGCCGCTTTTCTCCCACCCGTGG
>SRR492407.100047232
AGGAGCTGAATATGCAACAGCAATCCAAGGACGCATACCCAGACGGAAACTAAGTTCCCACTCACGACCCATATAACAAGCTACACCAAGTAAAAAGTGTA
>SRR492407.100048112
ATTTTAGAGAGACGCGAAAGCGAAAGCCTATGGGGTCGCTTCTGTAACTGGATAACTAGCACTGAAAACCGTCTTTACATTGGATGGGTTTGGGGTTTTGT
>SRR492407.100051072
ATTTTGAAATAGATTCTCTATTCCTAATTTCTTTCATATGGAAAATGCTGGGAAGAGCAAACAAGGGATCCCAATCTCCCTACCAATCTATGATACATGAA
>SRR492407.100051182
ATATGTTTCTAAATAGAGTGAAATTAGAATCTAATGGATATGAATTGATGTAGATACAATTATTAGTATTAGGCTGTTTTCTCTTTTTTTTTCTAAAGTGT
>SRR492407.100051932
TAGGCGTAGAGGAACAACACCAATCCATCCCGAACTTGGTGGTTAAACTCTACTGCGGTGACGATACTGTAGGGGAGGGCCTGCGGAAAAATAGCTCGACG
>SRR492407.100055322
TAAAAAATAAATAAAAAAAAATCTAAAAATCGTCTAGTACGGAATCTTTTCAAGAAGTGATTGGTCTAACATAAAAAAAAAAAAAAAAAAAAAGGGGTAAG
>SRR492407.100063532
TGAGCAAAAAGCTGCTGAATTGGCTTACTTCTTGCGTGTACCAATTGAAGTATTTTGAAATTAGGCAGTAGGAAGAAAAAACGAAAGAATTTCTTTCTTTT
>SRR492407.100071752
CTAGCTACAATCAAAAAGTTCATAATACTTTTTTTTTTGTATCCCCACTCAATCTTGGTTACTTTTTTTATCACACGGCCTTGTTTAAAAATAAAAAAAGA
>SRR492407.100072952
CGAGCATAAAAGAAGAGATGAATATTCAATTGAAAAAAAAAAGAAAGAAATTCTTTCGTTTTTTCTTCCTACTGCCTAATTTCAAAATACTTCAATTGGTA
>SRR492407.100076032
CAGGAATATTCACCTGTTGTCCATCGACTACGCCTTTCGGCCTGATCTTAGGCCCTGACTCACCCTCCGTGGACGAACCTTGCGGAGGAACCCTTGGGTTT
>SRR492407.100081632
AAAACCTTATTCCATGGTATTTACATGAGATTGCTCTTTCTTATTCTTAAGCAAGTCCCCGAGAGGGCTTAGTTGATCCAAGATCGGAAGAGCACACGTCT
>SRR492407.100081742
ACGAAACCTAGAAATCGATCACTGATCCAATTTGAGTACCTCTACAGGATAGACCTCAACAGAAAACTGAAGAGTAACGGCAGCGAGGGGTTGGGGTTAGT
>SRR492407.100083882
GCCTCTGACCATCAAATGAAATGTGAATAACCCGTCCTCCTCTCTTTGAAACAAGGGGCGCTTATGGTTCTGTCGGTGCTTGAAACAATTTTGTCTTCTCC
>SRR492407.100090442
GGATTATATTGCCCCCAATTTTTATGAAATACAAGATGCTTATTGAATGATAAAAAATGAGCCAATAGGATGAACTAAAAAAAAAGAGTTCTGCATTATGA
>SRR492407.100091032
GAAGCCAATTTATTAAAATTTCAATTGACTTTTTGTCCTTTATATTTTTTTCGAGAATACAATGAAAAATGTAACTAAATTAAAGTAGTTGGAACTTCAAC
>SRR492407.100091992
CCGACTTGCATGTGTTAAGCATGCCGCCAGCGTTCATCCTGAGCCAGGATCGAACTCTCCATGAGATTCACAGTTGCATTACTTATAGCTTCCTTCTTCGT
>SRR492407.100096522
CAAACCTAAATACCCAAGAAGCATTAGCTCTCCCTGAAAAGGAGGTGATCCAGCCGCACCTTCCAGTACGGCTACCCTGTTACGACTTCCACCCCGGCACC
>SRR492407.100102062
TGACTCTGCGCAAAAAACTACAGGATTGACTGACGCTGTTCAAACAGGTACAGGTCAACTAAACGGTATTCCGGTAGCCCTTGGGGTTATGGATTAGATCG
>SRR492407.100106322
ATCATTCCAATTGCCATTACAAAAATAATGAAAATTTTGGAAATTAAGAAATATTTTTGGCTGGTAATTATTCCAAAAAAAACAATGAATTCTGCAATAAA
>SRR492407.100108502
ACCAATGTCAGTAATTGACGATTACACTATTCGAACAATTTGGAATTCACCTCAAACAAAAAATGGGGTAAACCCTTTAATTTGATTAAAAAAAGAATTCC
>SRR492407.100108822
TTTCATGTTGTCAAAGAGTTGAACAATGGTTTTTTCGTGTTGTCAAAGAGTTGAACTATGAAAATAGATGGCGAGTGCCTGATCAGATCGGAAGAGCACAC
>SRR492407.100118442
TTGAACCTCGCCCTTAACTTTAAGGCTATGCCATCCTAAGGTGCTGCTAAATGGAAAGATCTTATCAACGTCCATGAATGAAAAATCATAGATCGAACTGC
>SRR492407.100120942
ATTCAATCATCCAAAAAGAGGATATGATTGAGTATCGAGGAGTCCAAAAAATTAAGACAAAATACGAAATGAAAGTAGATCGCTTTTTTTTCATTCCTGAG
>SRR492407.100124372
AGATTGTATCAATCTACCCTTGTGTGATTCCTGTTGAATCATATACTGCGGGGCGCAGGGCGGACGATTTCAAAGCGGACTCCCCCTCCCCATTCATTAGA
>SRR492407.100133212
AAGTGGGCGATGGCATCGCTCGTATTTATGGTCTTGATGAAGTAATGGCAGGGGGATTAGTAGAATTTTTTGAGGGTGCCATAGGGATTGCCCCTTTTTTT
>SRR492407.100133832
AAGCTGTGGGATGTCAAAATGCATCGGTAGGGGAGCGTTCCGCCTTAGGGGGAAGCAACCGCGCGAGCGGCGGGGGGCGGAGGGGGAGGGGGGAAGGGGGG
>SRR492407.100136902
GATAGCGAAGTAGTACCGTGAGGGAAGGGGGAAAAGAACCCCCATCGGGGAGTGAAATAGAACATGAAACCGTAAGCTCCCAAGCAGTGGGAGGAGCCCAG
>SRR492407.100142742
GAAGCTGTGGGATGTCAAAATGCATCGGTAGGGGAGCGTTCCGCCTTAGGGGGAAGCAACCGCGCGAGCGGCGGGGGGCGAAGCGGGAGGGGGAAAGGCGG
>SRR492407.100143732
TGCCTCTATGGTAGAATCAGTCAGGGGCCTGATAGGCGGTGGTTTACCCTGTGGCGGATGTCAGCGGTTCGGGTCCCCCTTTCTCCAAACTCTGGAGTTTG
>SRR492407.100144772
TGAAAGTATAAGAAGATTAGCAAAACAAACGACTTTTTTTGATAAACGAATCATTGATGGAATTACAAATGGAGTAGGTATTACAAGTTTCTTTGTAGGAG
>SRR492407.100152082
TCTGCCCGGCGTGTCCTTTATATGGAAATTCGAGGTCAAGGGGCTATTCCTTTAATTCGTACTGATGAGAATTTTACTACACGAGAAATTGAGCAAAAAGC
>SRR492407.10015242
CTTATTATCCTAGGTCGGAACAAGTTGATAGGATCCCCTTTTACGCCCCCATGTCCCTCTCGTGTGGCGGCAGGGGGGCGTAAAAAAGAAAGAGAGAGAAG
>SRR492407.100153232
GGGGCTTTTTACCAGAGGTTTAGATTGTATCAATCTACCCTTGTGTGATTCCTGTTGAATCATATACTGCGGGGCGCAGGGCGGACGATTTCAAAGCGGAC
>SRR492407.100154842
GGAACAAGGTTCAAGTCTACCGGTCTGTTAGGATGCCTCAGCTGCATACATCACTGCACTTCCACTTGACAACTATCGTAATGATAAAAGGCTCATCTTCC
>SRR492407.100155872
TCCTGAATTGGCTTACTTCTTGCGTGTACCAATTGAAGTATTTTGAAATTAGGCAGTAGGAAGAAAAAACGAAAGAATTTCTTTCTTTTTTTTTTCAATTG
>SRR492407.100157312
CACCGGCAGTCTGTTCAGGGTTCCAAACTCAACGGTGGCAACTAAACACGAGGGTTGCGCTCGTTGCGGGACTTAACCCAACACCTTACGGCACGAGCTGA
>SRR492407.100157942
CATCAATAAAAAAACCTTTCGGCTTGTTATCCAGGAACTTGTTCAGAAATACTGTAATGAAAGGAACATAGGAGTTTGTCGCAGATCGGAAGAGGACACGT
>SRR492407.100159502
AAGTTGGTGACCTGATGACAGGGGAGCCGGCGACCGAAGCCCCGGTGAACGGCGGGCGGGACTATAACGGGCCTAAGGGAGCGAAAATCACTGTCGGGCGA
>SRR492407.100161612
TGGTTATTAGGGGCATCCCGAAAACGTCCGGGTCGAAATATGGCTTTCAAATTAAGTTCCGAATTAGTGGATGCTGCCCAAGGGGGGGGGGATGCCCTAAC
>SRR492407.10016432
ATAGTGGATATAGTCATGATTCGATGGGTTAGGTCCACTTACTTTTTCTTTTGGATTTGTCGATTTCTAATCTATCGAAAAATCGAAAAAAAAAAAAAATA
>SRR492407.100164892
TTAAGCTATGCCGACCATTACTGAGGTATCATCTACTGAAGTATCATCTTGCTTTTACTAATGGTGACATAAGGATTTTCAGTCCTCTGCAACTAAGCTAT
>SRR492407.100170522
GGTCCAATAATGTATGTATATTGGATTTTTTGAGACAATTGTAGATTCTGGGAGGCAATTCTAATTGGTCAATAAAAATATATTGAAAGGAGATCGGAAGA
>SRR492407.100171982
CCCGGGAACGAATTCACCGCCGTATGGCTGACCGGCGATTACTAGCGATTCCGGCTTCATGCAGGCGAGGTGCAGCCCGCAATCCCACACGAGGGCCGGGT
>SRR492407.100178862
GTAGTACCGTGAGGGAAGGGTGAAAAGAACCCCCATCGGGGAGTGAAATAGAACATGAAACCGTAAGCTCCCAAGCAGTGGGAGGAGCCCTGGGCTCTGAC
>SRR492407.100181882
CGACGGTGAAGTAAGACCAAACCCATGAGCTTATTATCCTAGGTCGGAACAAGTTGATAGGATCCCCTTTTACGCCCCCCTGTCCCTCTCGTGTGGCGGCG
>SRR492407.100183442
CTAAAAGAAAGATCGATTCTTTTGGATCCTTCCTTTATTCAAACGGAAGGAAGAGAGATAGAATCAGACCGATTCCCTAAATACCTTTCTGGCTATTCCTC
>SRR492407.10018372
AAAAAAAGAAAGAAATTCTTTCGTTTTTTCTTCCTACTGCCTAATTTCAAAATACTTCAATTGGTACACGCAAGAAGTAAGCCAATTCAGCAGCTTTTTGC
>SRR492407.100185632
ACCTAATACTTCTTTTTCAAGTTTTGAATCTTTGACTTTTTATAAATCCAAATATTTAATATTAAAATATTAATAAAATCACTCTTGACAGTAATATCTGT
>SRR492407.100189612
ATTAACATTTCCCTTTTTTTCATTCTAGTTATTAACATCAGAAAGGGGTGAAAAATTTAGAGATACAATCAACAATCGGGGACTAACCCCCCCACCCTTTC
>SRR492407.100191662
CGGGACCAACAAGGGGTAGTACAGGAATATTCACCTGTTGTCCATCGACTACGCCTTTCGGCCTGATCTTAGGCCCTGACTCACCCTCCGTGGACGAACCT
>SRR492407.10019382
ATTATATTTATTCTATATATTAATATATTAATATTAATTCTTGAATATTAATTTAATATTGAATTCCAGATTCAAGAATATATTATTCTTATATTTCCATA
>SRR492407.100195892
GAAATGAGAAGCAAAAATATTCTGATAAAGACGTTCTTCAGTAATATCATCATGACTCTCGAAGTCATGTGCGGTAGCAATACCAAACCAAATACGACGAG
>SRR492407.100198802
ACTTGCTGCCGTTACTCTTCAGTTTTCTGTTGAGGTCTATCCTGTAGAGGTACTCAAATTGGATCAGATCGGAAGAGCACACGTCTGAACTCCAGTCACCT
>SRR492407.10019952
GTGAACATCTTTATTAGTAGCAGGGTCTGGAGCAAGAATAGGAAAGGTTATTTCACTATATTTTTGACCAGGAACAGGACCTATCACAAGAATATTTTTTT
>SRR492407.100199842
GAACAGAAGAATTATAAATCTCCAAAATAATAGATAGGAATACCGCAAATAGAGCCATTGCAACACCCATCAAAGGGGTCGTTCCCCATCCGGGAGCTACT
>SRR492407.100200542
TAACCATGGGTTCCAGTGCACGAGATCTTGTAGCACTTACCAATGAGGCCCTATCAATTAGTATTACACAGAAGAAATCAATTATAGACACTAATACAATT
>SRR492407.10020152
TACACTTTAGAAAAAAAAAGAGAAAANNNNNTAATACTAATAATTGTATCTACATCAATTCNNNNNCATTAGATTCTAATTTCACTCTATTTAGANNNNTA
>SRR492407.10020452
CTTATAATAGTTAATAGTCATTAATAAAGAAAAATTTTTCTTCCATTACAAATTTCTACAAAATTGATTAGAATCTGATCTAACAACAGGGAATTTTCGGG
>SRR492407.100205422
AAATAAAATTGAACATTTGTATATTATAATACAATTACAATGAATAATGATAAGTCGTCTCTTGAATCGCCAAATATATATTCTTTTTTTTTTTCGATTTT
>SRR492407.10020992	Yes
TTAGCCGGAAAGATATGTGGCCATGAAATAGGGATTAAGTGGAACGGAATTGACTGGGTGGTAGAAAGAATGGAATGATTTTGAATATCGATTCATTAGTA
>SRR492407.10021912
AAAACAATATTAACAAGTTTTGATTCAATCGTCGAGATTAAAATTTAAATAAAGAAGCCAATTTATTAAAATTTCAATTGACTTTTTGTCCTTTATATTTT
>SRR492407.100219852
TGTGATGTAACTCTGTCGTTATTGACCAATTGAAATTGATAGAATGTATCAATAATCAAGAGTTTTTTTCTATTCAAATGGCAAAAGATCGGAAGAGCACA
>SRR492407.100221662
TATTATCCTAGGTCGGAACAAGTTGATAGGATCCCCTTTTACGCCCCCATGTCCCTCTCGTGTGGCGGCAGGGGGGGGTGAAAAAGAAAGAGAGAGGAGGG
>SRR492407.100227402
ATCTGCCGAAGCTGTGGGATGTCAAAATGCATCGGTAGGGGAGCGTTCCGCCTTAGGGGGAAGCAACCGCGCGAGCGGCGGGGGGGGGAGGGGGAGGGGGG
>SRR492407.100227972
TTGGGAGGGGAACAACAGCTGGAAACGGCTGCTAATACCCCGTAGGCTGAGGAGCAAAAGGAGGAATCCGCCCGAGGAGGGGCTCGCGGGCGGTTGTGCTG
>SRR492407.10023092
GCAATTAAGCTATGCCGACCATTACTGAGGTATCATCTACTGAAGTATCATCTTGCTTTTACTAATGGTGACATAAGGATTTTCAGTCCTCTGCAACTAAG
>SRR492407.100232592
ACCCCTTCTCTGTCATTTATGCAAAAAAAAAAAAAAAAATGGTTATGTAGACAGCTAATTATTGGGCCGAGCTGGATTTGAACCAGCGTAGACATATTGCC
>SRR492407.100236442
TGAGATTCATAGTTGCATTACTTATAGCTTCCTTCTTCGTAGACAAAGCTGATTCGGAATTGTCTTTCATTCCAAGTCATAACTTGTATCCAAGATCGGAA
>SRR492407.1002412
AGGCGCGAACTCAAAAAAGAAATAAATAAAACCATAATCATAGAAATAGAGAATCCTTTTTTTATTTTGTCTCGTCAAAACACAAGTAAAAGATCTTTTTT
>SRR492407.100248692
CGGGAGCCTATTAATGAGGCAAATTCAATGAAACAACAACTGGTACCATAAAGAAGCGGCCATAGGCTGGGGAATCTTGATCAATTTTTAAAATAATTTAA
>SRR492407.100252052
AAATTTGTTTTTTATATGTTTCTAAATAGAGTGAAATTAGAATCTAATGGATATGAATTGATGTAGATACAATTATTAGTATTAGGCTGTTTTCTCTTTTT
>SRR492407.100252582
TTGAACCTCGCCCTTAACTTTAAGGCTATGCCATCCTAAGGTGCTGCTAAATGGAAAGATCTTATCAACGTCCATGAATGAAAAATCATAGATCGAACTGC
>SRR492407.100252652
TAGCACGGTTAATAATATCAGCCCAAGTATTAATAACACGTCCTTGACTATCAACTACTGATTGGTTGAAATTGAAACCATTTAGGTTGAAAGCCATAGTA
>SRR492407.100253392
GGATTCCACGTGCCCCATGCTACTCGGGTCAGAGCATAAGCTAGTGATGCTTTCGGCTACTGGACTCTCGCCCTCTAGGGGGGGGGGCCCCACCGCTTTTC
>SRR492407.100255342
CTTGTGATGGTTTCGCGAAGTTTAAGTAATTCTTCCGCTTCCAAGATAGATCGGAAGAGCACACGTCTGAACTCCAGTCACCTTGTAATCTCGTATGCCGT
>SRR492407.100265052
TATTCAACAACCTCTGTTAAAAAATAATCACAAAAATCCAAGCATTTATCTATCCAACCATAAGGTAAATCAGCCGCTATTCCTCCAATACGAAAAAAATT
>SRR492407.100269442
TTTAAGTTCTTTTCTTTCTAAGAGGTGGAATAGAATAACCCGGTTGAAGCGTAATGATCATACGTCTGTAATGCATTGTATGTCCCAGAATAGGTCCCATT
>SRR492407.100270172
GAAAGCAATAAATGAAGGGGGGGGGATACAATTCTATTTCTATTGTATCTAATGAACCTTGGGGTATTTTTGCCCTTCAACTATAGTATACTATACATATA
>SRR492407.100270742
CTTGAATTCTCAAAACTTCTGTCACTCCATCCCCGCAGGGGCGGAGAACCCGTTGCTGTCTCGGCTGTGCTACCGGGGGCTCTCGGGGAGACGGGATAGGG
>SRR492407.100273372
GCGGTGTGTACAAGGCCCGGGAACGAATTCACCGCCGTATGGCTGACCGGCGATTACTAGCGATTCCGGCTTCCTGCCCGCGAGGTGGCGGCTCCACACCC
>SRR492407.100274682
CAAGATGAGTGCTCTCCTATTCCGACTTCCCCAGAGCCTCCGGTAGCACAGCCGAGACAGCAACGGGTTCTCCGCCCCTGCGGGGATGGAGTGACAGAAGT
>SRR492407.10027492
TAGTACGAGAGGACCGGGAAGGACGCACCTCTGGTGTACCAGTTATCGTGCCCACGGTAAACGCTGGGTAGCCAAGTGCGGAGCGGATAACTGCTGAAAGC
>SRR492407.100274942
GTGGACGAAGCGGAAGCGAGAATGTCGGCTTGGGGAACGCAAACATTGGTGAGAATCCAATGCCCCGAAAAACCAAGGGGTCCTCCGCAAGGGTCGCTCCC
>SRR492407.10027922
TTTTGTCCAGATCTTCCCCTTCTTCCGAAAAAAGAGAAGGAAAAGGAGCTTCTTCGGTGGATACCTCTTGGTCCTGTTTAGTCCCACCCGTTTCTGAGGTT
>SRR492407.100280682
TCGCGGGCTGCAATACGGGCTCGGTGTCATTATGTTAATAAAAAATGGCTCGGCGGGATGTTTAAAAATTGGGCCAACACCGGAAAAAGACTTCATCAATT
>SRR492407.100282952
CTTGCGTCCTTGAACCGATAACCATCTTTCGGCTAACCTAGCCTCCTCCGTCCCTCGGGACCAACAAGGGGTAGTACAGGAATATTCACCTGTTGTCCATC
>SRR492407.100284782
TTAGAGCATTGAGAGGACCTTTCCCTAGTACGAGAGGACCGGGAAGGACGCACCTCTGGTGTACCAGTTATCGTGCCCACGGTAAACGCTGGGTAGCCAAG
>SRR492407.100295342
ACAAAAGACCCATCCCCAAGTTCCATAGCTTTGAGTCCGCTATCGCTATCCCGAGCATGATTTTCCTACCCCCCCGGAGGGAAAGGTCCTTCCCTTTTGGG
>SRR492407.100296312
CAAGTTATACCTTTCGTCACCACTTTGTGGAAAATCGTTAGATATGAATATGTTAGATACCTGTGACTCGATTGACGAAGGTGAAATAGTATCTCTCTCCA
>SRR492407.100296842
TTTGGCAGCTAATCCTCTTGATAGTACGGTAGTCGCATCTAAATGTGCAAATGTGGTGGCAGGGGGGGGGGCAGGCAAAACCTCTGGAGGGAACTTAACAG
>SRR492407.100300382
AGCAATTAGGAAAATCTAATTTTATTTAAAATTGCTAAGGATTTTGAAGAAGTTTTTATTTTTCGAAAAAGCATTTTTTTATCAATTTTTTTCATATAAAT
>SRR492407.100305802
AAAAAAGGTCTATATGTATAGTATACTATAGTTGAAGGGCAAAAATACCCCAAGGTTCATTAGATACAATAGAAATAGAATTGTATCCCCCCCCCCTCCAT
>SRR492407.100306052
ATGGAGAGTTCGATCCTGGCTCAGGATGAACGCTGGCGGCATGCTTAACACATGCAAGTCGGACGGGAAGTGGTGTTTCCAGTGGCGGGGGGGGGGGGGAG
>SRR492407.100310512
TTTGAATCTTTGACTTTTTATAAATCCAAATATTTAATATTAAAATATTAATAAAATCAATCTTGACAGTAATATCTGTTGTATATGTAAATACTAGATAT
>SRR492407.100316252
ATAAGATCGGAAAGCAATAAATGAAGGGGGGGGGATACAATTCTATTTCTATTGTATCTAATGAACCTTGGGGTATTTTTGCCCTTCAACTATAGTATACT
>SRR492407.100319372
CGGAAGACGGTTGAATCCCTCTGTCTTTTGTTCAGTTCTCAAGTCCCTAAACTTATGAAGTCTTTTTTCGGTAGTGGACCAATTTGTTAACATGCCGCCGA
>SRR492407.100322072
AGAGAAGGAAAAGGGGCTTCTTCGGTGGATACCTCTTGGTCCTGTTTAGTCCCACCCGTTTCTGAGGTTCCTTTAAGTTTCTTAGTAAAAATGGGTGATGG
>SRR492407.100324772
CAGGAATTTCAATTGCGCTTATATTCATCACTGTAGGAATTGGGTTCAAGCTTTCCATAGACCCTTATCATCAATGGACTCCTGACGTATACGAAGGGGTG
>SRR492407.100327862
GTAAAGAACTCAAACGTAACAATGGGACGATAATACGATATGATGACAATGCCGAGATCGGAAGAGCACACGTCTGAACTCCAGTCACCTTGTAATCTCGT
>SRR492407.100330592
AAAGGATTTCGGGTATAGTTTTCCTTGCGATGGTCCGGGACGAGGTGGTACTTGTGATATTTCGGCTTTGGGCGCGTTTTTTTTGGCCGTTTTCTTGGAGT
>SRR492407.100331432
CAACAAGGGGTAGTACAGGAATATTCACCTGTTGTCCATCGACTACGCCTTTCGGCCTGATCTTAGGCCCTGACTCACCCTCCGTGGACGAACCTTTCGGG
>SRR492407.100337472
AGAGCATTGAGAGGACCTTTCCCTAGTACGAGAGGACCGGGAAGGACGCACCTCTGGTGTACCAGTTATCGTGCCCACGGTAAACGCTGGGTAGCCAAGTG
>SRR492407.100337512
AATAGATAGGAATACCGCAAATAGAGCCATTGCAACACCCATCAAAGGGGTCGTTCCCCATCCGGGAGCTACTTTACCATATTCGGAATTCAATGGTTTCA
>SRR492407.100342172
CCAGATCTTCCCCTTCTTCCGAAAAAAGAGAAGGAAAAGGAGCTTCTTCGGTGGATACCTCTTGGTCCTGTTTAGTCCCACCCGTTTCTGAGGTTCCTTTA
>SRR492407.100345082
AGTTAGCTCACCCTCGCGGGATCGCGACCCTTTGTCCCGGCCATTGTAGCACGTGTGTCGCCCAGGGCATAAGGGGCATGATGACTTGACGTCATCCTCAC
>SRR492407.10034732
CGGGATACTTAACGCGTTAGCTACAGCACTGCACGGGTCGATACGCACAGCGCCTAGTATCCATCGTTTACGGCTAAAACTATTCGGGGGTATCAACTCCC
>SRR492407.10035022
CGTGCCCCATGCTACTCGGGTCAGAGCATAAGCTAGTGATGCTTTCGGCTAATGGACTCTCGCCCTCTAGGGGGCGGCACTCCACCGCTTCGCCTAGCCGC
>SRR492407.10035092
AATTCTATTAGGTCTAATGTAGTTATTAGATCTAATAAGTATAAGTTCCTTGTGTCAGAATTGAGAAATTCTATGGCTCCCAACTTTTTTATTTTTTTATT
>SRR492407.100355792
CGGTATCCAGGGGTCGCGGACCGACCATAGAACCCTGTTCAATAAGTGGAATGCATTAGCTGTCCGCTCGCAGGTTGGGCAGTAAGGGTCAGATCGGAAGA
>SRR492407.100357442
TGTTGTTCCTCTACGCCTAGGACACCAGAATATCGAACCATGAACGAAGAAAGGCATGCGAGAAAAGCATATTGGCTAATTATTGTGTGGCCCCACTTATT
>SRR492407.100357752
AAATCAAAAATACGCATGTCGGATTAAATTGTTGTTGCTATCTGTTCCAATAACGAATCAACTGAATAACTAAATAAAATAGATAGACCTTTCTCTTCGTC
>SRR492407.100360042
GCTTAGTTGCAGAGGACTGAAAATCCTTATGTCACCATTAGTAAAAGCAAGATGATACTTCAGTAGATGATACCTAAGTAATGGTCGGCATAACTTAATTG
>SRR492407.10036232
TGCACTCTTCATTCTCGTTCCTACTGCTTTTTTGCTTATAATTTACGTAAAAACCGTTAGTCAAAATGATTAATTTGAATAAAATTTTACTATCAATAAAA
>SRR492407.100362592
CTTCCTTCTTCGTAGACAAAGCTGATTCGGAATTGTCTTTCATTCCAAGTCATAACTTGTATCCATGCGCTTCATATTCGCATGGAGTTCGCTCCCAGAAA
>SRR492407.10036872
GACAATATGCGGAATTCATCCATGAAAATGAAAAACAAGGGGGGGGGGTTGCTAAAGGGATGAATAAATGGGACGCATAACCGGATATGCTAAAAAGAAAA
>SRR492407.100372952
ATACTACTGGAAAGGACGGTTTCAATATTGCCCATACGTAATCCTTTGTATAGACGTTGAGGCGGACGAAAACTTAGACGGGAAAGGACCGCCAATATTCC
>SRR492407.100378052
GGTTAAGAGATAATTGAGCATGCCATGATGTTGTTAGAATTTCATATAGGCCTTTATGGCCTTGGCCTGTAAATGGACCTTTATAGATCGGAAGAGCACCC
>SRR492407.100378582
TAGAACTTTGGTTCAAAATCTTCTTGATTCATCTGCCCCTGAGGAATTGCCAAACCATCTGACTCTTCACACATTCCAATATGAAGGGTTAGTCAATCAAA
>SRR492407.100382252
GAGACTGTCCCTTGGCCCGTAGGTCCTGACACAAGGTTAGAATTCTAGCTCTTCCAGAGTGGTATCTCACTGATGGCTCCCCCCCCCCCCCCCGGGGGGGC
>SRR492407.100382312
TTATGTAAAATTGAGAGAATAAAAAAAAAAAAGTAAATTTTTTAATTATATCTTTGTTATCTGATATGAGAAAAAAAGAAGAAATGAATTTGATATACCAA
>SRR492407.100387822
GTTAATACATAGAGTCCAATAAGCATATCTTGAGTCGGTACCGAAATGGGATCTCCAATAGCTGGAGATAAGAGATTCATATGAGAAAACATAAGTAAACG
>SRR492407.100390742
TGAACCTCTTCCCATGCGATAGTCAAAAATTCTTGGCGGTATCGAGCTGGAACAGCCTGTTCTTCTTGAATGCCCCGATTAAGAGCCAAAGAATTTACTGC
>SRR492407.100393662
TATCTATCCAACCATAAGGTAAATCAGCCGCTATTCCTCCAATACGAAAAAAATTATGCATCATTCTCATACCGGTGGCAGCTTCGAATAGATCCTATACA
>SRR492407.100396272
TACGTAAGGGCTTATTGGATGCAATTGTACCACGTAATCTTTTAAAAGGTAGATCGGAAGAGCACACGTCTGAACTACAGTCACCTTGTAATATCCTGTGC
>SRR492407.100396382
AGTGCCCAGATCGTTACGCCTTTCGTGCGGGTCGGAACTTACCCGACAAGGAATTTCGCTACCTTAGGACCGTTATAGTTACGGCCGCCGTTCACCGGGGC
>SRR492407.100397252
CCCGTTTGTGCCTCATAAAACGAACTAGCGGGTTGATGGATCATTACCCTGATGATATAATAGAAAAGGTTTTTCTATTTCGCAGAATGAGACGGGATAAC
>SRR492407.100397302
AAGATATTTTAGAGGCTCATAAAGGTCCATTTACAGGCCAAGGCCATAAAGGCCTATATGAAATTCTAACAACATCATGGAATGCTCAATTATTTCTTAAC
>SRR492407.10039872
CTATGTCCACCATTAGTCTACTGAAGTATCAAGTATCATCTACTGAAGTATCATGCTCGTTTTCCTAATGGTGACACGAGGATTTCGAGTCCTCTGCAAAA
>SRR492407.100401312
GCTTGGTGGGCCGGGAATGCCCGACTTATCAATTTATCTGGTAAACTTTTGGGAGCTCATGTAGCCCATGCCGGATTAATCGTATTCTGGGCCGGAGCAAT
>SRR492407.100403072
CGTCGTGAGACAGTTCGGTCCATATCCGGTGTGGGCGTTAGAGCATTGAGAGGACCTTTCCCTAGTACGAGAGGACCGGGAAGGACGCACCTCTGGTGTAC
>SRR492407.100405872
GTGGTCCTTGCTGATTCACACGGGATTCCACGTGCCCCATGCTACTCGGGTCAGAGCATAAGCTAGTGATGCTTTCGGCTACTGGACTCTTCCCCCCTTTG
>SRR492407.100406172
ACAGGAATATTCACCTGTTGTCCATCGACTACGCCTTTCGGCCTGATCTTAGGCCCTGACTCACCCTCCGTGGACGAACCTTGCGGAGGAACCCTTGGGTT
>SRR492407.100410722
CCAGCTATATCAGAGTAATTATGCTGGAATTGAGTCGTATAGCTTCTCATCTGTTATGGCTCCCCCCCCTTTTTGCAGGGAATATTGGTCCAGCGCCCCCT
>SRR492407.100411152
CACAACGACGCAATTATCAGGGGCGCGCTCTACCACTGAGCTAATAGCCCGTCGTGCGGGGCCCCCCGCGGGGGGCCGCCCCGCCACGGCAAACCCCAGGA
>SRR492407.10041612
GCTGCAATATGATGAGAGGCTATTCCTCCCGGAACAAAAGGGTCAAAACCCTCCACGCCCCACGCCGGGTTTACGGGTTGTACCTTTCCGGTTAGTCCATA
>SRR492407.100417262
TTTTGTTATATTCTAGTTGATGGAATCCGGTGAATTATTTTTCATATTGAAATGAATCAAAATTGATAAGGAGTTGCTGAATGATACTAGAACATGTACTT
>SRR492407.100419382
TAAAAAAACTACAAAAAAAATCCAGAATTTTGTGATTTCTGGGCTTAAACAAAAGGATTCGCAAATAAAAGCGCTAATGCTACAACCAGGCCATAAATTGT
>SRR492407.100419672
GTTGGGTTTTTACAGGCATTTTTGATGCCGCTATTGAAATAGCTTTTCTTGATATATTTTCGGGTACACCAACCATTTCATAAAGGATTTTACCTGGATTA
>SRR492407.10042222
ANGGATTTTCCTTCCTTTTGCCGCANNNNNNNNNAAGGGTTGAAGGGAGATAGTGCATNNNNNNNNNNGCAAGGGCCAACTTGATCCTCTTCCCCNNNNNT
>SRR492407.100428992
CTTTTCGACTCTGACTCTCCCACTCCAGTCGTTGCTTTTCTTTCTGTTACTTCGAAAGTAGCTGCTTCAGCTTTCGCCACTCGGATTTTTGGTTTTTCCTT
>SRR492407.10042962
AACCCATGAGCTTATTATCCTAGGTCGGAACAAGTTGATAGGATCCCCTTTTACGCCCCCATGTCCCTCTCGTGTGGCGGCCGGGGGGCGGAAAAAGGAAA
>SRR492407.100429892
TGAAGTATCAAGTATCATCTACTGAAGTATCATGCTCGTTTTCCTAATGGTGACACGAGGATTTCGAGTCCTCTGCAAAAAAGCTATGTCTACCTTTACTG
>SRR492407.100430872
GGCGGCATGCTTAACACATGCAAGTCGGACGGGAAGTGGTGTTTCCAGTGGCGGGCGGGGGGGTAAAGCGGAAGAAACCGCCCCTGGGGGGGGGGAGAAAG
>SRR492407.100431492
CTATAGAGAGTCTTCCATCTTTTTGCATTTCCCGAAAATTCCCTGTTGTTAGATCAGATTCTAATCAATTTTGTAGAAATTTGTAATGGAAGAAAAATTTT
>SRR492407.100431812
TTATGGCGGAACGGGCCAATCTGGTATTTCACAATAAAGTGATAGATGGAACTGCTATTAAACGACTTATCAGCCGATTAATAGATCACTTCGGGATGGCA
>SRR492407.100432102
ATATAGAAATAGAAAGAGATAGACTAGAAACGACATCTCTTATGTCAATGACACCAAAGGGATATTAAATGAATGGAATTGGGAGATCGGAAGAGCACACG
>SRR492407.100432632
TGCAGACTTTGATGGGGATCAAATGGCTGTTCATGTGCCTTTATCTTTAGAGGCTCAAGCAGAGGCTCCCTTTCTTTTTTTTTTTTCTCTGAATATTTTTT
>SRR492407.100432862
GTCCAGATCTTCCCCTTCTTCCGAAAAAAGAGAAGGAAAAGGAGCTTCTTCGGTGGATACCTCTTGGTCCTGTTTAGTCCCACCCGTTTCTGAGGTTCCTT
>SRR492407.100433092
GTAGTACCGTGAGGGAAGGGTGAAAAGAACCCCCATCGGGGAGTGAAATAGAACATGAAACCGTAAGCTCCCAAGCAGTGGGAGGAGCCCTGGGCTCTGAC
>SRR492407.100433902
ATCAGGCTCGAACTGATGACTTCCACCACGTCAAGGTGACACTCTACCGCTGAGTTATATCCCTTCCCCCATCAAGAAATAGAACTGACTAATCCTAAGAT
>SRR492407.100435492
CCTCTATTCAATCCTTTTCCTTCTTCTTGTTGCTGGATATATCGTTCGTACACATCTTCTCTTTGTTTCCCGAGCCTATAGTGAGTTACAGACAGAGTTCG
>SRR492407.100439022
TTTATTATTTTTTTGACATAAAAAGTTGAAGGGAATTCTATGAAGAGATAATGGATTATGGGAGTGTGTGACTTGAACTATTGAGATCGGAAGAGCACACG
>SRR492407.100447912
CTGACGCCTGCCCAGTGCCGGAAGGTTAAGGAAGTTGGTGACCTGATGACAGGGGAGCCGGCGACCGAAGCCCCGGTGAACGGCGGGCGGAAACAAAAAGG
>SRR492407.100448102
GGTTCCGAAGGATGAACTGGATATGGACAGTTCCAATAAGATTTCATTCTTGAACAAAAATCCATTTTTTGATTTATTTCATCTATTACATGAACGGGAGG
>SRR492407.100448832
TGGGGGCTGACGCCTGCCCAGTGCCGGAAGGTTAAGGAAGTTGGTGACCTGATGACAGAGGAGCCGGCGACCGAAGCCCCCGTGCACGGCGGGCGGGGCCA
>SRR492407.100452532
ATCAAATGAAATGTGAATAACCCGTCCTCCTCTCTTTGAAACAAGGGGCGCTTATGGTTCTGTCGGTGCTTGAAACAATTTTGTCTTCTCCATATTACTAT
>SRR492407.100455952
TGTTGAAACTAGCATATTGGAAAATCAATCGGCCAAAATAACCGTGAGCAGCTACAATGTTGTAAGTTTCTTCTTCTTGCCCGAATCTGTAACCTTCATTA
>SRR492407.100458412
GGGTCTCCGAGATCCTTTCGACGACCTATGTTGTGTTGAAGGGATATCTAGATGATCCGATCAATTGCGTAAAGCCCGCAGTAGCAACGGAACCAGATCGG
>SRR492407.100462732
CATAACTTGTATCCATGCGCTTCATATTCGCATGGAGTTCGCTCCCAGAAATATAGCTACCCCTACCCCCTCACGTCAATCCCACGAGCCTCTTATCCATT
>SRR492407.100462972
TTAAACAAGGCCGTGTGATAAAAAAAGTAACCAAGATTGAGTGGGGATACAAAAAAAAAAGTATTATGAACTTTTTGATTGTAGCTAGTGAACGAGGAAAA
>SRR492407.100468992
ATAATGTAATGAATCCCGAGGCTTCGGCATAAGAAAAAAAAGGAAAGACATCATAATGAGATCCTAAAAAAGGGGATATGGCGGCAAAGGAAGATGTTTCG
>SRR492407.100477642
AGGTTCGGGTCCATAAGCAGTGACAATTGCCCTATGAAGACTCGCTTTCGCTACGGCTCCGGGGGGGTCCCCTAACCAAACCACCGCCCATGAGGAGCCGG
>SRR492407.100478272
GCTAGTAATCGCCGGTCAGCCATACGGCGGTGAATTCGTTCCCGGGCCTTGTACACACCGCCCGTCACACTATGGGAGCCGGCCCTGCCCGAAGTCGTTTC
>SRR492407.100479192
GGATGGCCATTTATGCATGAACCAAGCCATTTTTTTTGTATTGATTATTATCTTTATTAGTGTTAACAAATTACGAAAGCAAATGACTACAGCAAAAGATC
>SRR492407.100481592
ACATTTTTCATTGTATTCTCGAAAAAAATATAAAGGACAAAAAGTCAATTGAAATTTTAATAAATTGGCTTCTTTATTTAAATTTTAATCTCGACGATTGA
>SRR492407.100484902
AAGCTAGAAAAGTGTCTTTCTAATCGTAACTAAATCTTCAGTTCTATTCATTGTTTGGTATAGAAAAATTGAAGCAAAATAGCTATTAAAGATCGGAAGAG
>SRR492407.100493062
TTCAAGGACGCAAGGTGTCCCTGTTTTTTCAGGGTAAGAAGGGGTAGAGAAAATGCCCCGAGCCAATGTTCGAGTACCAGGCGCTACGGCGCTGAAGTAAC
>SRR492407.100495042
CGTAGTTCCTACGGGGTGGAGACGATGGGGTCGGTCCATGGATTTTCCTTCCTTTTGCCGCCTTTCGCTCAAAGGGTTGAAGGGAGATAGTGCATCAAGCT
>SRR492407.100500112
ATGCCTCAGCTGCATACATCACTGCACTTCCACTTGACACCTATCGTAATGATAAACGGCTCGTCTCCCCCGGACCCTCTCTTTAATTTTCAAAACTTTTT
>SRR492407.100500722
AGAAAATCCTAATATAATAGAAAAGAAAAGAACTGTCTTTTCTGTATACTTATGTATACTTTCCCCGGTTCCGTTGCCACTGGGGGCTTTACCCCATTTAT
>SRR492407.100501632
GGGAAATATTCAAGTTCCTAAAAGGGCCAGCTATATCAGAGTAATTATGCTGGAATTGAGTCGTATAGCTTCTCATCTGTTATGGCTCCCCCCCCTTCTTG
>SRR492407.100501722
CCTGTTGTCCATCGACTACGCCTTTCGGCCTGATCTTAGGCCCTGACTCACCCTCCGTGGACGAACCTTGCGGAGGAACCCTTGGGTTTTCGGGGCATTGG
>SRR492407.100503212
ACTATCCATGTGGCTGAGAGCCCTCACAGCCCAGGCACAACGACGCAATTATCAGGGGCGCGCTCTACCACTGAGCTAATAGCCCGTCGTTGCGGGCGTCC
>SRR492407.10050542
GAAAATATCGAGAGAGAATTGGATTTGGTTAGACAATGTGTGGTTGGTAAACAAGGATAGATTTTTTAGCAAGGTACGAAACGAATCGGCAAATATACAAT
>SRR492407.100506872
TTTCATATTTCCGTATGTGGAAAGAAGTATAAATATCACCATATACTAGACACTCACTAATGAGTACCGCATCTTCAAAATTGTATCCTTCCCATGGCATA
>SRR492407.100507612
TTTTCATTTCCCGTCTCATGGAAAACCCTTTTCGCTCCGCTTAGCCCTATCCCCCTCTAGGAGGATTTTAGTGATAGGTTCTACAGGAACTGGACGAACCT
>SRR492407.1005092
TTGAACTATCCATGTGGCTGAGAGCCCTCACAGCCCAGGCACAACGACGCAATTATCAGGGGCGCGCTCTACCACTGAGCTAATAGCCCGTCGTTGGGCGG
>SRR492407.100509292
GACCATCAAATGAAATGTGAATAACCCGTCCTCCTCTCTTTGAAACAAGGGGCGCTTATGGTTCTGTCGGTGCTTGAAACAATTTTGTCTTCTCCATATTA
>SRR492407.10051002
TCATCATCTCTTCCAAATCGATGTTCCAATATCTTTTTGTCATTTCTTTTCACACTTAAAAAGGGGGGCACCCCAAACTAAAATAAAATTTTGTTCCGATG
>SRR492407.100510492
GATCCAGTGGAGACGGGGGGGGGCTTGTAGCTCAGAGGATTAGAGCACGTGGCTACGAACCACGGGGGCGGGGGGTCGAATCCCCCCTCGGGATCGGAAGG
>SRR492407.100513712
CAAATCCCTTATGATACACCAGATCCGGCTCGGTTATTGGTAGAGGGAATAGAACTGCCATTTCTTGAAATTCCTCTTCTGACTCGTGGGGTAAAGGTCGG
>SRR492407.100514062
CTAATAGAAATATATAGAATAGAACCGAATAGAAATAGAATAGAAATAGAATAAAAAAATAGGTACAAAAAAAGCCAAACTAAATAAATGGACTTATTCAT
>SRR492407.100518212
GCTCGGGGCATTTTCTCTACCCCTTCTTACCCTGAAAAAACAGGGACACCTTGCGTCCTTGAACCGATAACCATCTTTCGGCTAAACCAGCCTCCCCCGTC
>SRR492407.100518492
ATCGATATAAGATCTACCTTGTTTTGATTTTGAAATAGATTCTCTATTCCTAATTTCTTTCATATGGAAAATGCTGGGAAGAGCAAACAAGGGATCCCAAT
>SRR492407.100520642
TCTGAATTCTTAAATTCGGAATGAATCAAATCTCCCCAAGTAGGATTCGAACCTACGACCAATCAGTTAACAGCCGACCGCTCTACCACTGAGCTACTGAG
>SRR492407.100522182
CAAAACTCTAGAACTTTGGTTCAAAATCTTCTTGATTCATCTGCCCCTGAGGAATTGCCAAACCATCTGACTCTTCACACATTCCAATATGAAGGGTTAGT
>SRR492407.100523972
CACGGGATTCCACGTGCCCCATGCTACTCGGGTCAGAGCATAAGCTAGTGATGCTTTCGGCTAATGGACTCCCCCCCCCTAGGGGGGGGCCCCCCACCCAC
>SRR492407.100525182
GCTGTGGGATGTCAAAATGCATCGGTAGGGGAGCGTTCCGCCTTAGGGGGAAGCAACCGCGCGAGCGGCGGGGGGCGAAGCCGGAACGCAGAACGCCGCGC
>SRR492407.100530892
GAAATAGAGAATCCTTTTTTTATTTTGTCTCGTCAAAACACAAGTAAAAGATCTTTTTTATTTTTTTTTAATAGCCTGGCCTGGTCAGTCCCCAGCCGGGC
>SRR492407.100535182
CTCTATTTGCCTCTGCCATTCTATGAGTCTCTTCCTTTTTGCGTATGGCATCGCCACTCCCTTTGGCAGCATCCACTAATTCGGAACTTAATTTGAAAGCC
>SRR492407.100538572
ATGAATATACCACACCAATTCGTTATGTATAGATGATGAGAAGATTCCATTGATACAGAGCCAATTCCAATAGACTTATTGGAGGGGCCGGTTGGGGGGGC
>SRR492407.100540552
TACAGGAATATTCACCTGTTGTCCATCGACTACGCCTTTCGGCCTGATCTTAGGCCCTGACTCACCCTCCGTGGACGAACCTTGCGGAGGAACCCTTTGGT
>SRR492407.100544432
ACCGAGTTGAGACATTGTAGAATAGGCTAAACCCCGCTTAATGTCTTTTTGAGCAAGAGCTAAAGTGGCTCCTAAGAGGACTGTTATTATACCTATTCAAA
>SRR492407.100551352
CTTCGGTGGATACCTCTTGGTCCTGTTTAGTCCCACCCGTTTCTGAGGTTCCTTTAAGTTTCTTAGTAAAAATGGGTGATGGTATTCTGCCTAAATAGTAG
>SRR492407.100551922
TGACGGTGATTCTCAAATATCACAGAACAGAATGTGATACGATGAGATAGAATGCAATAGAAACAAAGACACAGGGAACGGGTTAGATCGGAAGGGCACAC
>SRR492407.100552682
CCTTAGCAAGATCAAGATCGGAATTTTTTATGGAAAAAAAAAGTAACTAAACATAAAAAATAAAGAAAAAAGTAAAGTCGAACTATACCCTATACCCTGAA
>SRR492407.100552712
CAATATTTCGCGATCCGCTGCCGAACTTATTCCATTTCAATATTATGCCTTGAAGAGGACTCGAACCTCCACGCTCTTTAGCACGAGATTTTGAGTCTAGA
>SRR492407.100556152
TCCGTAAGTTCCAGCGGTATTTCTCAATTCTGTTCCATTTGGATCTATTTCTTATAAAAAATTCCAATTGAATATAGTCTCACTTCATACGTATTTAATAC
>SRR492407.10055642
TAAACACATATTACATTTTGGCCTTGTTGATTGAGAATTGTATCTGTGGCTAATGCTGTTTTTCCGGTCTGTGTGTCCCCCATAATTTATTTTTCTCGGCC
>SRR492407.10055672
TATACTCCTGAATATGAAACCAAGGATACTGATATCTTGGCAGCATTCCGAGTAACTCCTCAACCTGGAGTTCCACCTGAAGAAGCAGGGGCCGCGGGTGG
>SRR492407.100564732
TCTGTAATAAGTAAATGCCTCTTTTTCTCCGGAAGTTGTCGGAATGACTCGTAATAAGATATCGGCTATAAATGTAATAGTGTTATCAATAAAAAATTAAT
>SRR492407.100565232
TGTTTGCTGTAGTCATTTGCTTTCGTAATTTGTTAACACTAATAAAGATAATAATCAATACAAAAAAAATGGCTTGGGTAATGCCTAAATGGGCCACCCCG
>SRR492407.100568632
ACTGGAATTTCAGACATCGGCCCGACGATGATCCATTTTTCAAAAGAGCGCAAATTTTTTTACGTTTACACATGCATAAGAGTTTTTTTTATTTATGTTTG
>SRR492407.100571852
CCTTCTTACCCTGAAAAAACAGGGACACCTTGCGTCCTTGAACCGATAACCATCTTTCGGCTAACCTAGCTCCCCCGTCCCCTCGGAACAACAAAGGGGCG
>SRR492407.100573652
TCAAAAAGATATACCTTGGTTATATTTCATCTCTTCAACAAGTTTCGTAATGAGCATAACGGCCCTATTGTTCCGATGGAGAGAAGAACCTATGATTAGCT
>SRR492407.100575022
TTCCTTTAAGTTTCTTAGTAAAAATGGGTGATGGTATTCTGCCTAAATAGTAGACACAGGTAATAAATAAGAGAATACTAAAGATTCGAGCCATAGAATTT
>SRR492407.100576632
CATGCCGCCAGCGTTCATCCTGAGCCAGGATCGAACTCTCCATGAGATTCATAGTTGCATTACTTATAGCTTCCTTCTTCGTAGACAAAGCTGATTCGGAA
>SRR492407.100580432
CGGAGTCCCACTCATGGTGACCTCGTTGAATTGGGGGAAGCTGTAGGTATTATCGCGGGTCAATCGATCGGCGAACCGGGGTCTTAACTAACATTTAGAAC
>SRR492407.100581652
AGCAGCTGATTTAGTGTCGCGGGCTGCAATACGGGCTCGGTGTCATTATGTTAATAAAAAATGGCTCCGCGGCAAGTTTAAAAAATTGGCCCCTACCCGAA
>SRR492407.100589232
ACGGATACGGATGCTTTTTTTATCACCAAGTCAAGATGAATATTATATGATAGCGGCAGGGGAATTTTTTGGTCTTTATTTGGGGGATTAAAAAAGAAAAG
>SRR492407.100598692
CTGATTCACACGGGATTCCACGTGCCCCATGCTACTCGGGTCAGAGCATAAGCTAGTGATGCTTTCGGCTAACGGCACCCCGCCCTCCTCGGGGCGGCACC
>SRR492407.100599132
CTGATGCCATGGAGGGCCCTACTCCCATTTCGGCTCTTATACATGCTGCTACTATGGTAGCGGCGGGGGGGTTTTTTTTTTCTTCTGCTTTTTTTCTTTTT
>SRR492407.100599332
GGCTGCTGGCACAGAGTTAGCCGATGCTTATTCCCCAGATACCGTCATTGCTTCTTCTCTGGGAAAAGAAGTTCAGGACCCGTAGGACTTCTACCCCCACG
>SRR492407.100600372
CCTAAATACCCAAGAAGCATTAGCTCTCCCTGAAAAGGAGGTGATCCAGCCGCACCTTCCAGTACGGCTACCCTGTTTAGACCTTTCTCCACCTCCTCACC
>SRR492407.100603412
AACAAGTAGATCTACACCGGGGGAATTAGTAATGTGTCAGGAAAAATTGGTACAAGAAGCCGTGGATACACTTCTTGATAATGGAATCCGTGGACAACCCA
>SRR492407.100603462
AAGCATTTATCTATCCAACCATAAGGTAAATCAGCCGCTATTCCTCCAATACGAAAAAAATTATGCATCATTCTCATACCGGTGGCAGCTTCGAATAGATC
>SRR492407.100603722
CTTCTAATAGGCCATGAACTAGATCCGAATCATTCTCAACGAATCCATAAGAAGTGATCCTATTTTTTTCATCGGGTACGGGTAGGGACACAAGGCCGTGG
>SRR492407.100611682
GAATTCTAAATTCATGACTTGTAGGGAGGGACTTATGTCACCACAAACAGAGACTAAAGCAAGTGTTGGGTTCAAAGCTGGTGTTAAAGAGTATAAATTGA
>SRR492407.100613942
CTTGTCGGGTAAGTTCCGACCCGCACGAAAGGCGTAACGATCTGGGCACTGTCTCGGAGAGAGGCTCCGCGGAAAAAAAATGGCTCGGAAGAAGCGGGGTC
>SRR492407.100614032
AAGTATCATGCTCGTTTTCCTAATGGTGACACGAGGATTTCGAGTCCTCTGCAAAAAAGCTATGTCTACCTTTACTGAAGGATCATTATCATGTGACACAG
>SRR492407.100615672
ACTTAATTTATAATTTAGAATAAACCTTTTTCTTCATTAATTTTCATAGTTGTAATTTTTTTATATGAATTTTCCTCGTTCACTAGCTACAATCAAAAAGT
>SRR492407.100622612
GGCTCAGGATGAACGCTGGCGGCATGCTTAACACATGCAAGTCGGACGGGAAGTGGTGTTTCCAGTGGCGGGGGGGGGGGGGAAGGCGTAGAAACTGGCCC
>SRR492407.100631922
CCTAGGTCGGAACAAGTTGATAGGATCCCCTTTTACGCCCCCATGTCCCTCTCGTGTGGCGGCAGGGGGGCGGAAAAAGGGAAAGGAGGGGAGGGGGGTTT
>SRR492407.100632562
AATGAAAATAATGGAAAAAGTTGGATTCAATTGTCAACTACTCCTATCGGAAATAGGATTGACTACGGATTCGAGCCATAGCACATGGTTTCATAAAACCG
>SRR492407.100638082
TTAGGAATAGGCAAGCCTTTGTTTTATCTAGCGAATTCGAAACGGAACTTTAGTTATGATTCATTATTTCGATCTCATTAGCCTTTTTTTTCGTATTTTCA
>SRR492407.100640782
GTAGTAAGCCCACCCCAAGATGAGTGCTCTCCTATTCCGACTTCCCCAGAGCCTCCGGTAGCACAGCCGAGACAGCAACGGGTTCTCCGCCCCTGCGGCGG
>SRR492407.100645532
ATGGTCCTGGAATATGGGTATCCGACCCTTATGGACTAACCGGAAAGGTACAACCCGTAAACCCGGCGTGGGGCGTGGAGGGTTTTGACCCTTTTGTTCCG
>SRR492407.100646462
CCCTTACCTTGTGCCTTTTTATTTTTAATGGAAAAGGGGAGTTGTCCGAACTCTTGTTTTTAGTAATTTTTTTTTTTTTTTTACTTAAGTTAGGTTTTTTA
>SRR492407.100650842
GTATAACTGGATCTAATATATATGAGTTGGCGATCAGAATCTATATGGATAGAATTTATAACGGGGTCTCGAAAAACAAGTAATTTCTGCTGGGAGATCGG
>SRR492407.100652142
GAGCTACTGGTTTATCTTTCCAGCGAATCAAATTTGCCAAAGGTGTGCGTTCATGAGCCCACGCTAAAGTTTCAATCAATTCCTGCCAATAACCACGCCAG
>SRR492407.100658732
CCAATCCAAAACTATTGTTCTTTTTCTTGTTTCTGCAAATTAATTCCTTAAAATGAAACAAAAAGTAAAAGGGGGGATAGATCGGAAGAGCACACGTCTGA
>SRR492407.100659742
TTGGCTTAAATTTTCAGAAATAGTCGAACGGTCGATTCTTTTTTTTTTTTTTTTTTTTCCATAAAAAAAAATTTTTTTTTTTTTTTTTTAAAATTTGAATT
>SRR492407.100660012
CGGGTAAGTTCCGACCCGCACGAAAGGCGTAACGATCTGGGCACTGTCTCGGAGAGAGGCTCGGGGGAAAAGAGATGTCTGTGGAAAGGAGGAGCTCCCGG
>SRR492407.100660732
AAAATTAAGAGCCTTGAGCCAATAAAAACTAAGAAAATTGACTCAAAAACAAAAACAAATAAAAAAAATGAAATTCCCGATTTCATATAAGAGCTCCATTG
>SRR492407.100665762
TTTCCTCTGGCTACTAAGATGTTTCAGTTCGCCAGGTTGTCTCTTGCCTGCCCATGGATTCAGCAGCAGCTCAAAAGGTTAACCTATTCGGGAATCTCCGG
>SRR492407.10067252
TTGTACAGTAGTTTTTTTAAGTATCTGATAGGTTCCCTAGCAACACTTTTTTTCGTTCTATTACTAATTTCATTGGATCCTGAACCCTCGTTTTTATGACC
>SRR492407.100675182
ACAGGGGAAGGGGTCAGATTTATCCTGATGGTAGCAAAAGTAACAATACAGTTTATAATGCTACGGCAGGGGGGGTAAAAAAAAAAAATTTTAGAAAAAAA
>SRR492407.100678362
TTCAAGTGGGCGATGGCATCGCTCGTATTTATGGTCTTGATGAAGTAATGGCAGGGGGATTTGTAGGAATTTAGGAGGGGGCGATAAGGATTGGCCTTTAT
>SRR492407.100685282
CCTGATGCCATGGAGGGCCCTACTCCCATTTCGGCTCTTATACATGCTGCTACTATGGTAGCGGCGGGGGGGTTTTTTTTTGTTTCTCTTTTTTTCTTCTT
>SRR492407.100689652
AAGGACAAAAAGTCAATTGAAATTTTAATAAATTGGCTTCTTTATTTAAATTTTAATCTCGACGATTGAATCAAAACTTGTTAATATTGTTTTGAACAAGT
>SRR492407.100690992
GGAAAGGACGGTTTCAATATTGCCCATACGTAATCCTTTGTATAGACGTTGAGGCGGGCGAACACCAAGATGGCAGAGGCCCGCCAAAATACACCAAGGCC
>SRR492407.100694262
AGGACTCTTGTAAAATAGAATACAAAATGTCGAGCCAAGAGCACCTATATTCCTATATAAAAATAAAAGTGGCGGATGGAAAAATCCCCCGCATGAAAAGG
>SRR492407.100694402
TCTTTCGTATACTTATAGTTTGTTTCGTAAATTCTTTCATTTTGATAGTTTTTTCGATTACATGGATTATATCTGTTTGCACAAATACCTCGACGAGTGCC
>SRR492407.10069582
GACCTCAAAATAACTGGGGTCAAGGTCGGCCAGTGAGACGGTGGGGGATAAGCTTCATCGTCGAGAGGGAAAAAGCCCGGATCACCAGCTAAAGCCCCTAC
>SRR492407.100697682
AAGGCTGCTCCTGTATAAGGCGCGAGGTATTGTAACGTAGCTGGGGAATCGGCCGGTTCAGCTACCACAATAGTGGATTCCATTTCCCCTTCGTCCCGTCA
>SRR492407.100699602
GTATCATGCTCGTTTTCCTAATGGTGACACGAGGATTTCGAGTCCTCTGCAAAAAAGCTATGTCTACCTTTACTGAAGGATCATTATCATGTGACACAGGG
>SRR492407.10072
TATGTTATGGTCGGAGTCCCACTCATGGTGACCTCGTTGAATTGGGGGAAGCTGTAGGTATTATCGCGGGTCAATCGATAGGCGAACCGGGGACTCAAATA
>SRR492407.100700532
AGGAAGTTGGTGACCTGATGACAGGGGAGCCGGCGACCGAAGCCCCGGTGAACGGCGGGCGGGACGATAAGGGCTCTTAGGGGGCGAAAGTCACTGATCGG
>SRR492407.100706172
CCGTCGTTCCCATCGCTTCTTGATTAATCATTAGGCCCGAATTCTACAATGGAGCTCTTATATGAAATCGGGAATTTCATTTTTTTTATTTGTTTTTGTTT
>SRR492407.100707572
GAGTCAAGAGATAGATAACATGAAAAAAAGGCTCGAACGGTACGATCCCTCCGTCACCCCAGAATGAAAGGGGTGATCTCGTAGTTCTTGGTCTGTGAAGA
>SRR492407.100708142
TCGAGAAACGAAAGAAGGCTTCCACCTCCAAGTTTAACTCAGACGTAGCTCCCTTCTTTTTGGGTGTGAAGCTGTGTCAAACCTAAATACCCAAGAAGCAT
>SRR492407.100709932
TCTGTAATAAGTAAATGCCTCTTTTTCTCCGGAAGTTGTCGGAATGACTCGTAATAAGATATCGGCTAAAAATTTAAAAGTTTTTTCAAAAAAAATTTCAT
>SRR492407.100712532
AAAGATTCATTTTCTTCATAAAAAATAGGAGGTAGAACCAATAAAGATTTCTTTTTTGATTCATCCCTGAAGTTGAAAACCTCCTTCAAGAATTGTCTTTG
>SRR492407.100713222
AAGAAGGCCCCCTTCCGGGGGGGCCCGAGCCATCAGTGAGATACCACTCTGGAAGAGCTAGAATTCTAACCTTGTGTCAGGACCTACGGGCCAAGGGACAG
>SRR492407.10071692
CATTGAGAGGACCTTTCCCTAGTACGAGAGGACCGGGAAGGACGCACCTCTGGTGTACCAGTTATCGTGCCCACGGTAAACGCTGGGTAGCCAAGTGCGGG
>SRR492407.100718202
CCGAAAGGCGTAGTCGATGGACAACAGGTGAATATTCCTGTACTACCCCTTGTTGGTCCCGAGGGACGGAGGAGGCTAGGGTAGCCGAAAGATGGATATCG
>SRR492407.100718742
CACAGACATGTCTATTTCACCGAGCCTCTCTCCGAGACAGTGCCCAGATCGTTACGCCTTTCGTGCGGGTCGGAACTTACCCGACAAGGAATTTCGCTACC
>SRR492407.100725542
CCTTTGGCAGCATCCACTAATTCGGAACTTAATTTGAAAGCCATATTTCGACCCGGACGTTTTCGGGATGCCCCTAATAACCAACGAATGGCAAGTGCTTT
>SRR492407.100726342
TAGAATTTTATATCTTTTTAGATTAAAGGTTTAGTTTAATATTCTCTTCAATATAAAAATAAAAATAAAAAAATATTGAAGAGAATCTTGAAGAGAAGTAA
>SRR492407.10073142
GAATAGGAGAGCACTCATCTTGGGGTGGGCTTACTACTTAGATGCTTTCAGCAGTTATCCGCTCCGCACTTGGCTACCCAGCGTTTACCGTGGGGCGGGGA
>SRR492407.100731492
CTTCTCCTGGAACGGGCTCGATGTGGTAGCATCGTCCTTTGTAACGATCAAGGCTGGTAAGCCCATCGGTCCACACAGTTTTTCCTGTACCCGTAGAAGAT
>SRR492407.100736772
TGGGAAAATAAAATGGAGCACCTAACAACGTATCTTCACAGACCAAGAACTACGAGATCACCCCTCTCATTCTGGGGTGACGGAGGGATCGTACCGTAGAC
>SRR492407.10073962
GAGGAGCCCTGGGCTCTGACCGCGTGCCTGTTGAAGAATGAGCCGGCGACTCATAGGCAGTGGCTTGGGTAAGGGAAACCACCGGCACCGGCACGCAAGGG
>SRR492407.100741342
TTCCGTCGTTCCCATCGCTTCTTGATTAATCATTAGGCCCGAATTCTACAATGGAGCTCTTATATGAAATCGGGAATTTCATTTTTTTTATTTGTTTTTGT
>SRR492407.100742122
AGTGAAAAAGATACCGCGGCTTCGATCTTTTTCAACATAATCATCGCGCAGTAAATCAACAAAGCCCAAAGTTGACTCCCTGTCTCCTTCAAGTTTACCTA
>SRR492407.10074822
GACGAAGAGAAAGGTCTATCTATTTTATTTAGTTATTCAGTTGATTCGTTATTGGAACAGATAGCAACAACAATTTAAGATCGGAAGAGCACACGTCTGAA
>SRR492407.100749152
CTTGTTGAATGGCCTGTTCTCCACGGTCGGAATAGGCGGATCAATTCCCTCCCTGAGAACCGTACTTGAGAGTTTCCTACCTCATACGGCTCCCCCCACCA
>SRR492407.100756322
GGCTCTAGGCTGAGTAGCAGGAGCAACTTTTAATTTATTATGAGCCCAAACAATGGATTCAATAAGTTCTTGCCAATAACCACGCCCGCTAGATCGGAAGG
>SRR492407.100759492
CAGGCACTCGCCATCTATTTTCATAGTTCAACTCTTTGACAACACGAAAAAACCATTGTTCAACTCTTTGACAACATGAAAAAACCTAAAATTCTGCCCTT
>SRR492407.100760962
TCCAAGTACTCTGATTGATTATTTTTGAATTCTAATACAATACAGAAGAACTACCAAAGTGTTTCAAAGAAGGGTTCTCTTGACGTAGGTTTGCTTTTGGT
>SRR492407.100761062
GGAACGCTCCCCTACCGATGCATTTTGACATCCCACAGCTTCGGCAGATCGCTTAGCCCCGTTCATCTTCGGCGCAAGAGCGCTCGATCAAGATCGGAAGA
>SRR492407.100765882
AAGTTTTTTTTTGTCGTGGAAATCTTTGTTCTATTCTTAATATTTGTTCTATTCTTAATATATGTATATAAATTATTGTAATATGGAATTATAATTCACTT
>SRR492407.10076892
AAATGGAAAGATCTTATCAACGTCCATGAATGAAAAATCATAGATCGAACTGCCGAATCGGAAAAATTGGGTGCTATCATATAGCTTTGTATCGGCTAAGT
>SRR492407.100769412
TTGAATTTGATTAATTCAACTTATAAAACTTTGAAACAATTAGAAAATTACAAAAATGAAACCATTCTTTTTGAGCAACAAAGAACAAAGATCGGAAGAGC
>SRR492407.100770322
GTGGCACAACGATTTCAAGTCCCCCGGAAAAAAGCTATGTCCACCATTAGTCTACTGAAGTATCAAGTATCATCTACTGAAGTATCATGCTCGTTTTCCTA
>SRR492407.100770512
CAATCTCATGTAAATACCATGGAATAAGGTTTTATCCTATTCATGGGGATTCCGTAAATATTCCATTCCAAAAATCAAAAATTGAGATCGGAAGAGCACAC
>SRR492407.100770952
TACATGACCTGATCAATTCGATCAGGCACTCGCCATCTATTTTCATAGTTCAACTCTTTGACAACACGAAAAAACCATTGTTCAACTCTTTGACAACATGA
>SRR492407.100778712
AGGCTATTCCTCCCGGAACAAAAGGGTCAAAACCCTCCACGCCCCACGCCGGGATTACGGGTTGTACCTTTCCGGTTAGTCCCTAAGGGTCGGATACCCAT
>SRR492407.100781272
AGACTTTGATGGGGATCAAATGGCTGTTCATGTGCCTTTATCTTTAGAGGCTCAAGCAGAGGCTCCCTTTCTTTTTTTTTTTTCTCTTTATCTCTTATTTC
>SRR492407.100783412
AATACTATTGGATGGGTTACTTTTTATTGGCATTGGAAACACATCACATTATGGCAGGGGGAAGGTTCACCGGTTTATTAAATTTTCACCTTTTTTTTTGG
>SRR492407.100788202
GGTGAAAAATTTAGAGATACAATCAACAATCGGGGACTAACCCCCCCACCTTTTCTAATTAGTAGAATAAATTAGAAAAGGTGGGGGGGGGGAAGGTCATA
>SRR492407.100788592
CCCACGCCGGGTTTACGGGTTGTACCTTTCCGGTTAGTCCATAAGGGTCGGATACCCATATTCCAGGACCATATAATCCTGTTACATGAAATGCGCCAAAA
>SRR492407.10079332
TCAATAATAAAGAAAACAAGAAGAAATCCCTGTCCCCGTTCCATACAAATACCAAATAAAAAAAAACAATAAAGAAAGGGAATCTAGAAGATTCAAGAAGC
>SRR492407.10079722
AATAAAGAAAAATTTTTCTTCCATTACAAATTTCTACAAAATTGATTAGAATCTGATCTAACAACAGGGAATTTTCGGGAAATGCAAAAAAGATCGGAAGA
>SRR492407.100799122
CACTAGCTACAATCAAAAAGTTCATAATACTTTTTTTTTTGTATCCCCACTCAATCTTGGTTACTTTTTTTATCACACGGCCTTGTTTAAAAATAAAAAAA
>SRR492407.100799422
TTCTATTCCACCTCTTAGAAAGAAAAGAACTTAAATCAAAATACTTAATAGCATGGCGATACATTTATACAAAACTTCTACCCCGAGCACACGCAATGGAG
>SRR492407.100804842
CTTTTTACCAGAGGTTTAGATTGTATCAATCTACCCTTGTGTGATTCCTGTTGAATCATATACTGCGGGGCGCAGGGCGGACGATTTCAAAGCGGACTCCC
>SRR492407.100819312
GTCCAGGTGCAGGTAGTCCGCATCTTCACAGACATGTCTATTTCACCGAGCCTCTCTCCGAGACAGTGCCCAGATCGTTACGCCTTTCGTGCGGGTCGGAA
>SRR492407.100833962
ACCAAGCTTGAGTACGGTAGGGGCAGAGGGAATTTCCGGTGGAGCGGTGAAATGCGTAGAGATCGGAAAGAACACCAACGGCGAAAGCACTCTGCTGGGCC
>SRR492407.100834982
AATAATCTCATTTTTCAATTATTCAACCATTTCATTTTACCAAGTTCAATGTTAGCCAGATTAGTCAACATTTATATGTTTCGATGCAACAAAGATCGGAA
>SRR492407.100837132
TAATTTATGCAACAGCAGTCCAAACTATAAATTCTTTTGTTAAATTGGAATCTTTAAAAGAGGTCTATGGACTCATATGGATATTTGTCCCTATATTTTCT
>SRR492407.10083912
CGGTAGGACATGTATTTCTATTACTATGAAATTCATAAATAAAATAGTTAATCGTGGGGTTACCATTCTCTCTTTTTTTTTCGTTATCTCGCATGTGGTCC
>SRR492407.10084332
TCATGGGTTTGGTCTTACTTCACCGTCGAGAAACGAAAGAAGGCTTCCACCTCCAAGTTTAACTCAGACGTAGCTCCCTTCTTTTTGGGTGTGAAGCTGTG
>SRR492407.100849992
GCCAGCGAGAATTAATTATTGGTGACAGACAGACCGGTAAAACAGCAGTAGCCACAGATACAATTCTCAATCAACAAGGCCAAAATGTAATATGTGTTTAT
>SRR492407.10085032
GCAGGTTCTTACGCGTTACTCACCCGTCCGCCACTGGAAACACCACTTCCCGTCCGACTTGCATGTGTTAAGCATGCCGCCAGCGTTTATCCTGAGCCAGG
>SRR492407.100850662
GACTCGTGAAGGAAATGATCTTTACATGGAAATGAAAGAATCTGGAGTCATTAATGAACAAAATCTTGCGGAATCCAAAGTGGCCCTAGTTTAGATCGGAA
>SRR492407.100850922
CCCTGAGATGTGGATCATCCAAGGCACATTAGCATGGCGTACTCCTCCTGTTCGAACCGGGGTTTGAAACCAAACTTCTCCTCAGGAGGATAGATGGGGAG
>SRR492407.100853482
TGATCATCGCCTTGGTAAGCTATTGCCTCACCAACTAGCTAATCAGACGCGAGCCCCTCCTCGGGCGGATTCCTCCTTTTGCTCCTCAGCCTACGGGGTAT
>SRR492407.100855092
GATGGACAACAGGTGAATATTCCTGTACTACCCCTTGTTGGTCCCGAGGGACGGAGGAGGCTAGGTTAGCCGAAAGATGGTTATCGGCTCAAGGACGCAAG
>SRR492407.100858392
CTAGTACGAGAGGACCGGGAAGGACGCACCTCTGGTGTACCAGTTATCGTGCCCACGGTAAACGCTGGGTAGCCAAGTGCGGAGCGGATAACTGCTGAAAG
>SRR492407.100858572
AAAGACACTTTGGGATTGCTGAATCATCGACGAATCAAAACAATGATATATAAAGCAACGGAACCATCATAGTATTTTTTTAACTCCTACAAAAAAAAGAA
>SRR492407.10086332
GACTCGCTTTTGTTATAACGAAGCTAAAAAAGAATATTTACCTAAAATTTATGATCCTTTTTTGCATGGAATCTCTCGGGGAAGAATCAAAAAATAGATCG
>SRR492407.100866432
GGGGGGGAGTTCTTGTCTATCGTTGGCCTCTATGGTAGAATCAGTCAGGGGCCTGATAGGCGGTGGTTTACCCTGTGGGGGGGGGGAAGGGGTTGGGGCCC
>SRR492407.100866502
TGTAGCTGCTCACGGTTATTTTGGCCGATTGATTTTCCAATATGCTAGTTTCAACAATTCTCGTTCTTTACATTTCTTCTTAGCGGCTTTTTTGCTGGGGG
>SRR492407.100870302
TTGGATCTACATTGGATCTCACCTGAATCGCCCCATCTATCCTCCTGAGGAGAAGTTTGGTTTCAAACCCCGGTTCGAACAGGAGGAGTACGCCATGCTAA
>SRR492407.100872402
CATTAATAGGCTCCCGATTTGACTTTGATCGTTATGGGTTAGTACCAAGATCGAGTCCTAGACAGGCGGACCTTATTTTAAAAGCCGGGGAAGTAAAAAAA
>SRR492407.100890582
TTCGCTGTTCAAGAATTCTTGTTTAGGCAGTTCATACCATCCATACATAGTGTTTTGATCTAAGATTTCAATTCTTCCATGTTTCAGTAGTAGCATATTGT
>SRR492407.100892152
GTAGGTCCTGACACAAGGTTAGAATTCTAGCTCTTCCAGAGTGGTATCTCACTGATGGCTCCCTCCCCCCCCCCCCGGGGGGGCGGCCGCTCTTCCCCCTC
>SRR492407.100893932
ATTGAACTATCCATGTGGCTGAGAGCCCTCACAGCCCAGGCACAACGACGCAATTATCAGGGGCGCGCTCTACCACTGAGCTAATAGCCCGTCGTCGGGGG
>SRR492407.100894512
GTTCGAGTCCTCTTCAAGGCATAATATTGAAATGGAATAAGTTCGGCAGCGGATCGCGGAATATTGGGGGTCTTCTCTTTTTTATTAAAGGGGGGGGGGGG
>SRR492407.100898042
GGGAAAGGTCCTCTCAATGCTCTAACGCCCACACCGGATATGGACCGAACTGTCTCACGACGTTCTGAACCCAGCTCACGTACCGCTTTAATGGGCGAACA
>SRR492407.10089842
GCCCCGTAACTTCGGGAGAAGGGGTGCCTCCTCACAAAGGGGGTCGCAGTGACCAGGCCCGGGCGACTGTTTACCAAAAACACAGGTCTCCGCAAAGTCGA
>SRR492407.100899512
TGAAGGATCATTATCATGTGACACAGGGATTTTCAGTCCCCCGCAATTAAGCTATGCCGACCATTACTGAGGTATCATCTACTGAAGTATCATCTTGCTTT
>SRR492407.10091962
ANGCCATTTTTTTTATGAACCATTCNNNNNNNNNNTCGTTCTTTTTTTATCATTTTTTNNNNNNNNNNNCAGATAAAAAGGAAGAACTTCTAATCNNNNNC
>SRR492407.100921662
AAACATCTTAGTAGCCAGAGGAAAAGAAAGCAAAAGCGATTCCCGTAGTAGCGGCGAGGGAAAAGGGGGGAGCCCAAAACCGGAAAACGGGGGTGGGGGGG
>SRR492407.100923622
GGAACGCTCCCCTACCGATGCATTTTGACATCCCACAGCTTCGGCAGATCGCTTAGCCCCGTTCATCTTCGGCGCAAGAGCGCTCGAGATCGGAAGAGCAC
>SRR492407.100925842
CGGTGATAAGCCGGAGGAAGGTGAGGATGACGTCAAGTCATCATGCCCCTTATGCCCTGGGCGACACACGTGCTACAATGGCCGGGACAAAGGGTCGCGAT
>SRR492407.100926152
CACCATTGATCATGGTGTCTAATAAGTTATACCTACTATTGGATTTGAACCAATGACTCCTGCCGTATGAAAGCAATACTCTAACCACTGAGTTAAGTAGG
>SRR492407.100927102
CAGTAGGAACGAGAATGAAGAGTGCAGTAGCAATAAATGCAAGAATATTTACTTCCATAATTTAATCGTTTATTATTATTATTTTTTTTTTTTTTTTGAAT
>SRR492407.100927172
AAAATGCCAATCATAGTATTCATTCTTATGGGAATGGGAATGAAAAACAAGAGATTCTTTTTCTAGAAAGATCGGAAGAGCACACGTCTGAACTCCAGTCA
>SRR492407.100927352
CTGAATTACTTCTCTTCAAGATTCTCTTCAATATTTTTTTATTTTTATTTTTATATTGAAGAGAATATTAAACTAAACCTTTAATCTAAAAAGATATAAAA
>SRR492407.10092812
GCCGGAAGGTTAAGGAAGTTGGTGACCTGATGACAGGGGAGCCGGCGACCGAAGCCCCGGTGAACGGCGGGCGGAACCATAACGGGCCCAAGGGAGAGGAA
>SRR492407.100932382
ATTCTTTCGTTTTTTCTTCCTACTGCCTAATTTCAAAATACTTCAATTGGTACACGCAAGAAGTAAGCCAATTCAGCAGCTTTTTGCTCAATTTCTCGTGT
>SRR492407.100935102
CTCTTTGAGAAATCAAAAAAAGCACGGATACGGATGCTTTTTTTATCACCAAGTCAAGATGAATATTATATGATAGCGGCAGGGGAAATTTTTTGTCTTTA
>SRR492407.100935232
GTCGATGGACAACAGGTGAATATTCCTGTACTACCCCTTGTTGGTCCCGAGGGACGGAGGAGGCTAGGGTAGCCGAAAGATGGTTATCGGTTCAAGGACGC
>SRR492407.100937082
GGTGTGTACAAGGCCCGGGAACGAATTCACCGCCGTATGGCTGACCGGCGATTACTAGCGATTCCGGCTTAATTCAGGCGAGGTGCGGGCCGGAAACCGGA
>SRR492407.100939082
CCTTTATTCTATAGTCCTGGGGCTATTTACAACTAGCCAATTCAGAATTTTCAGATGTACTAACAAGTGCATCTTTGATGCAGTCATCGATTCTCCCGAGA
>SRR492407.100941112
GTTTCTTTTCATTGACATAGACCTAAGTCATATATTAAAATGATACTGATACTTCAGTAGATTATACTTCGGTAATGGTAGACATAGCTTAATTGCGGGGG
>SRR492407.100959342
TCTGACCATCAAATGAAATGTGAATAACCCGTCCTCCTCTCTTTGAAACAAGGGGCGCTTATGGTTCTGTCGGTGCTCGAAACAATTTTGTCTTCTCCATT
>SRR492407.100960442
AAAATTATGCATCATTCTCATACCGGTGGCAGCTTCGAATAGATCATATACAAATTCTCGGTCTCTGAAAATATAGAAAAAGGGAGACTGTGCACCAATAT
>SRR492407.10096112
TCCCATTGAGGCCGAACCTAAACCTGCGCTCGAGAGATAGCTGTCCATACACTGATAAGGGATGTATGGATTCTCGAGAAGAGAGGAGCCATAGAGGCCCC
>SRR492407.100969722
TTAGGCTCGGTCAACTGGAATGTGTCTTATCCATATAGGGGATCTTCCAATTGAGAAGATCTATCGACCTGAGACGAAGAGAAAGGGCTATCTAAGACCGG
>SRR492407.100972722
TATCCAAAGGATGGGGGGGCAGAGGCCTTTGGTGTCCACTCCAGTCAAGAATTGGAGCCTCACAATCACTAGCCAATATGCTTTTCTCGCATGCCTTTCTT
>SRR492407.100973372
TGTCGGTTTCGGGTACAGGTACCCTTTTGTTGAAGGTCGTTCGAGCTTTTCCTGGGAGTATAGCATGGGTTACTTCAGCGCCGTAGCGCCTGGTACTCGAA
>SRR492407.100976042
TACCTTAACCGCAAGGAGGGGGGTGCCGAAGGCAGGGCTAGTGACTGGAGTGAAGTCGTAACAAGGTAGCCGTACTGGAAGGGGCGGGGGGGGCGCCACCC
>SRR492407.100981582
GAAGCTGTGGGATGTCAAAATGCATCGGTAGGGGAGCGTTCCGCCTTAGGGGGAAGCAACCGCGCGAGCGGCGGGGGGGGGAGCGGGCGAGGGGAGGTTGG
>SRR492407.100989282
ATTTCGAGTAAGTCTTTACATAATCTTCTTCTGTCCGAAGAAATGATTCATCGAAATAATGAGTCATCATTGATATCGACACATCTGAGATCGCCAAATGT
>SRR492407.100991892
CAACACTTTTTTTCGTTCTATTACTAATTTCATTGGATCCTGAACCCTCGTTTTTATGACCTTTCCCCCCCCCACCCTTTCTAATTTTTTCTACTAATTTA
>SRR492407.100992602
TAAGCCGGAGGAAGGTGAGGATGACGTCAAGTCATCATGCCCCTTATGCCCTGGGCGACACACGTGCTACAATGGCCGGGACAAAGGGTCGCGATCCCGCG
>SRR492407.100994132
TTTCTGAACAAGTTCCTGGATAACAAGCCGAAAGGTTTTTTTATTGATGATATCGATATTGATGATAGTGACGATATTGATGCTAGTAACGATATTGATCG
>SRR492407.100995302
TGAGTGAGACAGATATGGAGCGAGTAATCTCTTCCCTTATCCAAGAAAAGGTATTTCTAGTTTGCATGGTCCAATCATTTATCCCGAAAATTTCTACAATA
>SRR492407.101000282
TCCATTGTGGAGCCGTATGCAATGCACAAAAAAAGCCTGTACGGTTATTCAAATTTATCTATTTTTTTTTGTTATCCCGTCTCATTCTGCGAAATAGAAAA
>SRR492407.101001282
TCGACATAGCTTAGTTGCAGAGGACTGAAAATCCTTATGTCACCATTAGTAAAAGCAAGATGATACTTCAGTAGATGATACCTCAGTAATGGTCGGCATAG
>SRR492407.1010022
CGTGGACGAACCTTGCGGAGGAACCCTTGGGTTTTCGGGGCATTGGATTCTCACCAATGTTTGCGTTACTCAAGCCGACATTCTCGCTTCCGCTTCGTCCA
>SRR492407.101003522
GTCTATATAGATCCTGTTCCTGGATTAACGAAAATGTGCAAAAGCTCTATTTGCCTCTGCCATTCTATGAGTCTCTTCCTTTTTGCGTATGGCATCGCCAC
>SRR492407.101004442
ATATGAATTTTCCTCGTTCACTAGCTACAATCAAAAAGTTCATAATACTTTTTTTTTTGTATCCCCACTCAATCTTGGTTACTTTTTTTATCACACGGCCT
>SRR492407.101004552
GTAATTACGAATATATTATATTAAAAGAATGTGCCTTAATACTTAATATTATTATATAAATACAATACAAGTTTTTAATTAAATTCTTTATATAAATATAA
>SRR492407.101004722
GGATAGATACCTTTGGCAGCTAATCCTCTTGATAGTACGGTAGTCGCATCTGAATGTGCAAATGTGGTGGCAGGGGCGGGGGCCGGCAAAATCTCTTCAGG
>SRR492407.101011222
CTAGGGAAAGGTCCTCTCAATGCTCTAACGCCCACACCGGATATGGACCGAACTGTCTCACGACGTTCTGAACCCAGCTCACGTACCGCTTTAATGGGCGA
>SRR492407.101012512
AGTGCTAATACCTAAAGCAGTAAACCAAATACCTACTACCGGCCAAGCCGCTAAGAAGAAATGTAAAGAACGAGAATTGTTGAAACGGAAGATCAATCGGC
>SRR492407.101013262
TGAATCCATGGGCAGGCAAGAGACAACCTGGCGAACTGAAACATCTTAGTAGCCAGAGGAAAAGAAAGCAAAAGCGATTCCCGTAGTAGCGGCGAGGGGAG
>SRR492407.10101472
CCGCTGAGTTATATCCCTTCCCCCATCAAGAAATAGAACTGACTAATCCTAAGTCAAAGGGTCGAGAAACTCAAGGCCACTATTCTTGAACAACTTGGATT
>SRR492407.10101722
AAAGGTATGGGTCACAATTATTACGGGGAACCCGCATGGCCCAACGACCTTTTATATATTTTTCCAGTAGTTATTCTTGGTACCATTGCAGATCGGAAGAG
>SRR492407.101018422
GACCAACAAGGGGTAGTACAGGAATATTCACCTGTTGTCCATCGACTACGCCTTTCGGCCTGATCTTAGGCCCTGACTCACCCTCCGTGGACGAACCTTGC
>SRR492407.101019852
GCACGGATACGGATGCTTTTTTTATCACCAAGTCAAGATGAATATTATATGATAGCGGCAGGGAAATATTTTGGTCCTTAACCGGGGCTTTCCAAAGAAAA
>SRR492407.101025802
GTACGGTTATTCAAATTTATCTATTTTTTTTTGTTATCCCGTCTCATTCTGCGAAATAGAAAAACCTTTTCTATTATATCATCAGGGTAATGATCCATCAA
>SRR492407.101034172
AAATTTGACCTTTTTTTCTTACCCCTTCTCTGTCATTTATGCAAAAAAAAAAAAAATGGTTATGTAGACAGCTAATTATTGGGCCGAGCTGGATTTGGACC
>SRR492407.101034802
CGTCAAGTCATCATGCCCCTTATGCCCTGGGCGACACACGTGCTACAATGGCCGGGACAAAGGGTCGCGATCCCGCGAGGGTGAGCTAACTCCAAAAACCC
>SRR492407.101037292
CCTTCTTTTTGGGTGTGAAGCTGTGTCAAACCTAAATACCCAAGAAGCATTAGCTCTCCCTGAAAAGGAGGTGATCCAGCCGCACCTTCCAGTACGGCTAC
>SRR492407.101038062
TTACCTGATGCCATGGAGGGCCCTACTCCCATTTCGGCTCTTATACATGCTGCTACTATGGTAGCGGCGGGGGGTTTTTTTTTTTGTCTCGTTCTTTTCTT
>SRR492407.101038892
AGGGGAACAACAGCTGGAAACGGCTGCTAATACCCCGTAGGCTGAGGAGCAAAAGGAGGAAACCGCCCGCGGAGGGGCTCCCGGCGTGTTTACTCGGGTGG
>SRR492407.10103962
CATCTTCACAGACATGTCTATTTCACCGAGCCTCTCTCCGAGACAGTGCCCAGATCGTTACGCCTTTCGTGCGGGTCGGAACTTACCCGACAAGGAATTTC
>SRR492407.101040002
AAATACTTGTATGCATCAAAAACCTCAGGTTCGTCGGGGTAAATGCATTAAAAAGGGACAAATTTTAGCGGATGGGGGTGGCACAGGTGGGGGGGGAACCC
>SRR492407.101040582
TTGGTTATATTTCATCTCTTCAACAAGTTTCGTAATGAGCATAACGGCCCTATTGTTCCGATGGAGAGAAGAACCTATGATTAGCTTTTCAGGAAATTTCC
>SRR492407.101042402
AATTGATATATAGAATAACTTTTTACTTGATTGATAATCACATAAAACCGAAGAAATTTTAGCCATTTGCATCAAACTTAAACTTCCTTCTTGCATTCGTG
>SRR492407.101043822
TTCTTCTTGCCCGAATCTGTAACCTTCATTAGCAGATTCATTTTCTGTGGTTTCCCCTGTTCAAACAAGAGGTTACCAAGGACCAATGATAAGCCTTAAAA
>SRR492407.101047912
TACCCCGAGCACACGCAATGGAGCCGTAGACAGTCAAGTGAAATCCAATCCACGAAATAATTTGATCTGTGGGCAGCATCATTGTGGAGATCGGAAGAGCA
>SRR492407.10104892
TAGCTACAGCACTGCACGGGTCGATACGCACAGCGCCTAGTATCCATCGTTTACGGCTAGGGCTACCGGGGGATCCAATCCCCTTCCCTCCCCCACCCTTC
>SRR492407.101054372
TCTACTGAAGTATCAAGTATCATCTACTGAAGTATCATGCTCGTTTTCCTAATGGTGACACGAGGATTTCGAGTCCTCTGCAAAAAAGCTATGTCTACCTT
>SRR492407.101056752
CAGCTACTGATCATCGCCTTGGTAAGCTATTGCCTCACCAACTAGCTAATCAGACGCGAGCCCCTCCTCGGGCGGATTCCTCCTTTTGCTCCTCAGCCTAC
>SRR492407.101057292
GTGGGATGTCAAAATGCATCGGTAGGGGAGCGTTCCGCCTTAGGGGGAAGCAACCGCGCGAGCGGCGGGGGGCGGAGCGGGAGGGGGGATGGCGGCGTGGG
>SRR492407.101057982
GTAAGGAGACCTATTGAAACCAAGAAATATAGGCCTGCCTGCCATCCACACCAGAATAAATGGAGTTTTCCAAAAAAACCTGCTAGTCGAGGAAAAACTTC
>SRR492407.101059632
TGGGGAAAGACACCATTGCTGATATAATAACCTCTATACGAAATGCTGACATGAATAGAAAAGGAACGGTTCGGATAGGATAGATAGGAAGAGCACACGGC
>SRR492407.101062012
CTAATGTAGTTATTAGATCTAATAAGTATAAGTTCCTTGTGTCAGAATTGAGAAATTCTATGGCTCCCAACTTTTGTATTTTCTTTTTTTTTTTCTTTGTT
>SRR492407.101062762
AATCTACAATTTAGAATTTTATATCTTTTTAGATTAAAGGTTTAGTTTAATATTCTCTTCAATATAAAAATAAAAATAAAAAAATATTGAAGAGAATCTTG
>SRR492407.101063042
GTCTAGGGTTAGGCCAGTAGGGTCTCTTAACGCCCTCTTTTTTCTTCTCATCGAAGTTATTTCACAAATACTTCCTATGGTAAGGAAGAAGATCGGAAGAG
>SRR492407.101065382
GCATCGGTAGGGGAGCGTTCCGCCTTAGGGGGAAGCAACCGCGCGAGCGGCGGGGGGCGGAGGGGGAGCGGGGATGGCGGGGGTGGGGAAGGAAAAAACTG
>SRR492407.101068762
TACTAGGTTTTACCCGATTTTAGAAAAAAGTCGGGTATTATTTTGATTATAAAACTTATAATATCTCTTTTAGAAGATCTTATGCCGCTACTCGGACTCGA
>SRR492407.101072002
GGCTACCGGAATACCGTTTAGTTGACCTGTACCTGTTTGAACAGCGTCAGTCAATCCTGTAGTTTTTTGCGCAGAGTCAAGATCGGAAGAGCACACGTCTG
>SRR492407.101077952
TCATATGTGGCAATTCCACCAAGATCTCTTCGTTAGTTGGGGGAAGAATCCGCACGAATCGGATTTTTTTAGGAAAATATAGATCGGAAGAGCACACGTCT
>SRR492407.101078592
TGCGACAGAGGGTTTAAAGAGAGGAATGGACGTGGTTGATATGGGAAATCCTCTAAGTGTTCCAGTCGGCGGAGGGAATCTAGGACGAATTTTCAACGTGC
>SRR492407.101081472
ATTATAATTCCATATTACAATAATTTATATACATATATTAAGAATAGAACAAATATTAAGAATAGAACAAAGATTTCCACGACAAAAAAAAACTTAATATT
>SRR492407.101089152
CTAATCCTAAGTCAAAGGGTCGAGAAACTCAAGGCCACTATTCTTGAACAACTTGGATTGGAGCCGGGCTTTCCTTTCGCACTTTATACGGGTATGAAATG
>SRR492407.101092672
TTTATAATGCAGAATTGATAACCTACGTATAAAATAATAAGAATTATTTGGATTTCAAGAAAAAAAGAAACAACTTTGCTGACAATTCTTAGATAGGAAGA
>SRR492407.101095332
GAGGTATCATCTACTGAAGTATCATCTTGCTTTTACTAATGGTGACATAAGGATTTTCAGTCCTCTGCAACTAAGCTATGTCGACCATTACCGAAGGATCA
>SRR492407.1010992
TATTCCTCCAATACGAAAAAAATTATGCATCATTCTCATACCGGTGGCAGCTTCGAATAGATCATATACAAATTCTCGTTCTCTGAAAATATAGAAAAAGG
>SRR492407.101107652
GTCCATCGACTACGCCTTTCGGCCTGATCTTAGGCCCTGACTCACCCTCCGTGGACGAACCTTGCGGAGGAACCCTTGGGTTTTCGGGGCATTGGATTCTC
>SRR492407.101109122
CCCCCATCAAGAAATAGAACTGACTAATCCTAAGTCAAAGGGTCGAGAAACTCAAGGCCACTATTCTTGAACAACTTGGATTGGAGCCGGGCTTTCCTTTC
>SRR492407.101111612
TCGACGAATCAAAACAATGATATATAAAGCAACGGAACCATCATAGTATTTTTTTAACTCCTACAAAAAAAAGAAGGATGGTAATTGGATGATTTAAGGAA
>SRR492407.101115602
ATTCGTCAGCACCGGTTTAGCTTACGATGTGTTCGGGAGCCCTCGTCCAAACGAGTATTTTACAGAGAGCCGACAAGGCATTCCATTAATAACAGGCCGTT
>SRR492407.101120552
TATATATGTAGGTGGAAACAGGGGAAGGGGTCAGATTTATCCTGATGGTAGCAAAAGTAACAATACAGTTTATAATGCTACGGCAGGGGGGGAAAAAAAGA
>SRR492407.101126932
TTCATTGACATAGACCTAAGTCATATATTAAAATGATACTGATACTTCAGTAGATTATACTTCGGTAATGGTAGACATAGCTTAATTGCGGGGGGCTGAAA
>SRR492407.101127722
TTTGGGATTGCTGAATCATCGACGAATCAAAACAATGATATATAAAGCAACGGAACCATCATAGTATTTTTTTAACTCCTACAAAAAAAAGAAGGATGGTA
>SRR492407.101132192
GGATTTCGAGTCCTCTGCAAAAAAGCTATGTCTACCTTTACTGAAGGATCATTATCATGTGACACAGGGATTGTCAGTCCCCCGCAATTAAGCTATGCCGA
>SRR492407.101133152
AGCTGATTTAGTGTCGCGGGCTGCAATACGGGCTCGGTGTCATTATGTTAATAAAAAATGGCTCGGCGGGGATTTAAACAATTTGGTCCTCACTCTGAAAA
>SRR492407.1011342
CTTTACCACAATGATGCTGCCCACAGATCAAATTATTTCGTGGATTGGATTTCACTTGACTGTCTACGGCTCCCATTCGGGGGCTCCGGGGGGAAGGTTTT
>SRR492407.101135452
CAAACCCATGAGCTTATTATCCTAGGTCGGAACAAGTTGATAGGATCCCCTTTTACGCCCCCATGTCCCTCTCGTGTGGCGGCAGGGGGGCGGGAAAAAGG
>SRR492407.101135532
TAGTAAAAGCAAGATGATCCTTCGGTAATGGTCGACATAGCTTAGTTGCAGAGGACTGAAAATCCTTATGTCACCATTAGTAAAAGCAAGATGATACTTCA
>SRR492407.101145502
ACACCCCGGAACGCACCGTTCTTATAGAGAGAAAGGCACTTTCAAATCCGAAATGGCTGGGGGGAGGAAAAGTTTCTTTTTTTAGGGGACTCCCAGGGACA
>SRR492407.101149722
GGCCGACACTGACACTGAGAGACGAAAGCTAGGGGAGCGAATGGGATTAGATACCCCAGTAGTCCTAGCCGTAAACGATGGATACTAGGCGCTGTGCGTAT
>SRR492407.101151872
ACGAGAGGACCGGGAAGGACGCACCTCTGGTGTACCAGTTATCGTGCCCACGGTAAACGCTGGGTAGCCAAGTGCGGAGCGGATAACTGCTGAAAGCATCT
>SRR492407.101154322
AGCTGCGCAGGAAAAGCCCAAAGCCAATCCCAGGGAACAGTGAAGCTTCATAGGGTCTTTCTGTCAGGGGCCGGGAGGTCCGCTTCTTACCAGACTTGCCT
>SRR492407.101155072
TCATATACAAATTCTCGTTCTCTGAAAATATAGAAAAAGGGAGTCTGTGCACCAATATCTGCCATAAAAGGGCCGAGCCATAACAGATGAGAAGCTATACG
>SRR492407.101162752
TTAGGTTTAGGTGCCTTTCTTCTAGTATTCAAGGCTCTCTATTTTGGGGGCGTATATGATACCTGGGCTCCGGGAGGGGGGGATAGATCGGAAGAGCACAC
>SRR492407.101162912
GCTGTCAAGAACGTAGAGGAGGTAGGATGGTCAGTTGGTCAGATCTAGTATGGATCGTACATGGACGGTAGTTGGAGGCGGCGGGTTCCCTTGGGGTTCCT
>SRR492407.101167222
CACTCGAGGGCCAATCTCCGTCCGGCCCGAGGAAACCTTTGCACGCCTCCGTTACCTTTTGGGAGGCCTACGCCCCATAGAAACTGTCTACCTGAGACCGT
>SRR492407.101170252
TATGTAACTTCCGTCCCCCCGCTTTCAAAATTAGAATTTTAATATTGTCGACTAGAACGATCTTATCGATTCCATTTGAAAACGTAAAGGCCTATTTATGT
>SRR492407.101172332
GATCAATGTGTGATAGTGATATTCCGAATCCTCATTACTAATGGAATCGAAAGGATCTATGAATTGATCAGAAGATCCGTTCAATTGGCTAAAATATCTTT
>SRR492407.101172392
TCATGGAGAGTTCGATCCTGGCTCAGGATGAACGCTGGCGGCATGCTTAACACATGCAAGTCGGACGGGAAGTGGTGTTTCCAGTGGCGGGGGGGGGGGGG
>SRR492407.10117672
TTCTTGTTTACTACTCAGTAAACCTCTATCAACAAGCTAAAAAGTGAATTTTTTTGGGGGGGAAGTTCAAATTAGACTAGACAAACAAAAAAAAGTTCATT
>SRR492407.101180322
AGACGGGAGACCCGTGGATATGGTCTTCAACCCATTAGGAGTACCCTCACGCATGAATGTAGGACAGATATTTGAATGCTCGCTTGGGTTAGCGGGAAGTC
>SRR492407.101181102
AGCAACACTTTTTTTCGTTCTATTACTAATTTCATTGGATCCTGAACCCTCGTTTTTATGACCTTTCCCCCCCCCCCCCCCTTTTATTTTTTTTCTTTTTT
>SRR492407.101181822
AGACACAGGTAATAAATAAGAGAATACTAAAGATTCGAGCCATAGAATTTCTCAATTCTGACACAAGGAACTTATACTTATTAGATCTAATAACTACATTA
>SRR492407.101183532
GTTAATCACGGAAGAAAGGACTCACTGCGCCAAGATCACTAACTAATCTAATAGAATAGAAAATCCTAATATAATAGAAAAGAAAGATCGGAAGAGCACAC
>SRR492407.101186382
CATATTGATGCATCCGAGATGACAATGTAATGTGATCGAAGGTGTATGTGAGAAAGAAACTCTCATTTACAGTTTCCTAAGATCGGAAGAGCACACGTCTG
>SRR492407.101187002
AAACTTACTCAGATGAATTAGATTGCGATGATATCGAATGAAAGAAATATCATGAATAACAATATCGGAGCTATAAAAAGATCGGAAGAGCACACGTCTGA
>SRR492407.101188312
ATAGCTTAGTTGCAGAGGACTGAAAATCCTTATGTCACCATTAGTAAAAGCAAGATGATACTTCAGTAGATGATACCTCAGTAATGGTCGGCATAGCTTAA
>SRR492407.101191252
ATTTGGTTAGACAATGTGTGGTTGGTAAACAAGGATAGATTTTTTAGCAAGGTACGAAACGTATCGTCAAATATTCAATATGATTCTACAAGATCTAGTTT
>SRR492407.101192352
TTAATTGAATCTCCTGCCCCAGGTATTATTTCGAGACGTTCTGTATATGAGCCTCTTCAAACAGGACTTATTGCTATTGATTCCATGATCCCTATAGGACG
>SRR492407.101192532
AGTTGAGGCACAATCAAAATATGGTTTTTGGGGATGGAATTTGTGGCGTCAACCTATAGGTTTTTTCATTTTTTTAATTTCTTCCCAACCAAAAGCGGAGG
>SRR492407.101196492
TAAAAAAAAAAAAAGACACTTTGGGATTGCTGAATCATCGACGAATCAAAACAATGATATATAAAGCAACGGAACCATCATAGTATTTTTTTAACTCCTAC
>SRR492407.101200842
TCCCGAAAACGTCCGGGTCGAAATATGGCTTTCAAATTAAGTTCCGAATTAGTGGATGGGGCCCAAGGGAGGGGGGATGCCACACCCAAAAAAGAAGAGAG
>SRR492407.101201132
AGACTTCTTCCGCTTGATTAACACCATATTCTATTCTCGTAAGATGATACACGCTGGCTAAGCGGCCAACAGGTGCCAAATCACTGGCGCATTTCGCACGT
>SRR492407.101203562
ATCAATAGGTCTTCAAATCGTTCATTTGAAAAAGTTGAAACCCTTTTTATTGGATGATACTAATACTTATCAAAAATCGAAATTCTTGATCAATGGAGGAA
>SRR492407.101204092
CTCTTCATGTATGGTTACCTGATGCCATGGAGGGCCCTACTCCCATTTCGGCTCTTATACATGCTGCTACTATGGTAGCGGCCGGGGGGTTTTTTTTTTTT
>SRR492407.101220052
GCTAATATACCCAACGTCCCTGCTGCAATATGATGAGAGGCTATTCCTCCCGGAACAAAAGGGTCAAAACCCTCCACGCCCCACGCCGGGTTTACGGGATG
>SRR492407.101228292
CATTTATCTATCCAACCATAAGGTAAATCAGCCGCTATTCCTCCAATACGAAAAAAATTATGCATCATTCTCATACCGGTGGCAGCTTCGAATAGATCATA
>SRR492407.101229662
AACCGTGAAAACGGGGTTGTGGGAGAGCAAAAAAAGCGTCGTGCTGCTAGGCGAAGCGGTGGCGCGCCGCACCCTAGATGGCGAGAGTCCAGTAGCCGAAG
>SRR492407.101231212
GCTGCCAAAGGTATCTATCCAGCGGTAGATCCTTTAGATTCAACGTCAACCATGCTACAACCTCGAATCGTTGGCGAGGAACCTTATGAAACTGCGCAACA
>SRR492407.101242812
CATGGAACAATATGCTACTACTGAAACATGGAAGAATTGAAATCTTAGATCAAAACACTATGTATGGATGGTATGAACTGCCTAAAAGATCGGAAGAGCAC
>SRR492407.101247312
ACTTGTATTGTATTTATATAATAATATTAAGTATTAAGGCACATTCTTTTAATATAATATATTCGTAATTACTTTCTTGAAATTGATAGGTTGAAAATACA
>SRR492407.101249122
GAGCATAAACCTAAAAAATGGAATAAAAAAAGGAAGAAGCACGTTCAGGAACAAGAAAAAACCATCGCCATTTCAACTGAATCTCGATGAAAAAAAAAATT
>SRR492407.101257802
CAAGAGACAACCTGGCGAACTGAAACATCTTAGTAGCCAGAGGAAAAGAAAGCAAAAGCGATTCCCGTAGTAGCGGCGAACGGAAAGGGGAGCAGCCAAAA
>SRR492407.101259102
GGGTTAGTACCAAGATCGAGTCCTAGACAGGCGGACCTTATTTTAACAGCAGGTACAGTAAAAATGAAAATAGCTCCCTCTTTTTTGGGGTTTTATTGACA
>SRR492407.101260332
GAATTGCCACAACATGGGCGTTCTTCTTAGCAAGAATTATTGCAGTAGGATAATGGCTAAGAGGGTTTGAAAAGGATTATGGGATTAAAGTTTTCCAGGGT
>SRR492407.101263562
GGGTGCCTTCGGGAACGCGGACACAGGTGGTGCATGGCTGTCGTCAGCTCGTGCCGTAAGGTGTTGGGTTAAGTCCCGCAACGAGCGCAACCCTCGTGTTT
>SRR492407.101267292
GAATATCGAACCATGAACGAAGAAAGGCATGCGAGAAAAGCATATTGGCTAGTGAGTGTGAGGCTCCCATTCCTTACTGGGGGGGACACCAAAGGACTCCT
>SRR492407.10126862
CGATGGACAACAGGTGAATATTCCTGTACTACCCCTTGTTGGTCCCGAGGGACGGAGGAGGCTAGGTTAGCCGAAAGATGGTTATCGGTTCAAGGGCGCAA
>SRR492407.10128212
GTATCGAATAGAACATGCCGAGTCAAATCTTCTTCATGTAAAACCGGCTTGATTTAGATCGGGAGAATCGTAAGGGTTTTAGAAACCATGAGCTCTCGCTC
>SRR492407.101283572
TTAATTGTTGGGACAAAAAATAAAGCAGCTGATTTAGTGTCGCGGGCTGCAATACGGGCTCGGTGTCATTATGTTAATAAAAAATGGCTCCGGCGGGAGGT
>SRR492407.101283622
TTTGAAGAAGTTTTTATTTTTCGAAAAAGCATTTTTTTATCAATTTTTTTTCATATAAATGAAAAAAAAATGATAAAGAGCATTTAGAGTTTTGTCTTTGG
>SRR492407.101285472
GCTGGATAGATACCTTTGGCAGCTAATCCTCTTGATAGTACGGTAGTCGCATCTAAATGTGCAAATGTGGTGGCAGGGGGGGGGGCCGGCAAAACAATTCG
>SRR492407.101292082
TCTGAGCAATTTTTCCCGTAGCTTTGACTGAACTTCCTTCTTGGATCATCAAACCGTCACCCATTAATACAACACCAACATTATTGGATTCTAAATTAAGG
>SRR492407.101292142
AGTCATCGACTCCCCGGAAAGGTTAAAAGAATGGGACCTATTCTGGGACATACAATGCATTACAGACGTATGATCATTACGCTTCAACCGGGTTATTCTAT
>SRR492407.101294982
ATTAATATACAACCTAATAGAAATATATAGAATAGAACCGAATAGAAATAGAATAGAAATAGAATAAAAAAATAGGTACAAAAAAAGCCAAACTAAATAAA
>SRR492407.101295562
AGAAACCCTCCACTTCAATTGGTATTTTTTCACGAAAAGCAAACATGAGATAACAAATCCAGTCTTTCACTAAGATCGGAAGAGCACACGTCTGAACTCCA
>SRR492407.101297342
GACAACCTGGCGAACTGAAACATCTTAGTAGCCAGAGGAAAAGAAAGCAAAAGCGATTCCCGTAGTAGCGGCGAGCGGAAAGGGGGGGGGCTCAAACCCGA
>SRR492407.101299642
CATTGTGGAGCCGTATGCAATGCACAAAAAAAGCCTGTACGGTTATTCAAATTTATCTATTTTTTTTTGTTATCCCGTCTCATTCTGCGAAATAGAAAAAC
>SRR492407.101301032
CAATATCCCTTCCTTTTCCAAATTTTATTACGAATACGCTTTTTCGAGATAGAAGTACGTTTTTTTGGAACTGCCATTCAAAAATAGATCGGAAGAGCACA
>SRR492407.101301392
TAAGGCTATGCCATCCTAAGGTGCTGCTAAATGGAAAGATCTTATCAACGTCCATGAATGAAAAATCATAGATCGAACTGCCGAATCGGAAAAATTGGGTG
>SRR492407.10130592
TTTGTGTCAATGGATTTGTTCGATCCAAAACTTGAGATAATGGGTGTAATCCGAAAAAGGATTCATAAGTAGTTGTTAACGGAGTTGAAGTTACCAAATTC
>SRR492407.101307812
TTGGGACAAAAAATAAAGCAGCTGATTTAGTGTCGCGGGCTGCAATACGGGCTCGGTGTCATTATGTTAATAAAAAATGGCTCGGCGGGGCGGTTAAAAAA
>SRR492407.101309912
CATATCCGAAAGGAAAGGTTAAATGAGTTCCGTTGAATCAAACAAGTAAAAAAAGGTCTATATGTATAGTATACTATAGTTGAAGGGCAAAAATACCCCAA
>SRR492407.101313782
TTAACACCTCAAGTGGCGAAAGAATCCTCCTATGCTCCGGAAGATAGGTTATTACGAGCTATACTTGGCATTCAGGTATCGACTTCAAAAGAGATCGGAAG
>SRR492407.101316452
CTTTTCCTGGGAGTATAGCATGGGTTACTTCAGCGCCGTAGCGCCTGGTACTCGAACATTGGCTCCGGGGATTTTTTTTTCCCCCTCTTTTCCCCTAAAAA
>SRR492407.101317542
TCCTCTACGCCTAGGACACCAGAATATCGAACCATGAACGAAGAAAGGCATGCGAGAAAAGCATATTGGCTAAGGATTGTGAGGGGCCAATTTCTGTTTGG
>SRR492407.101318472
AAGCTGTGGGATGTCAAAATGCATCGGTAGGGGAGCGTTCCGCCTTAGGGGGAAGCAACCGCGCGAGCGGCGGGGGACGAAGGGGAAGCGCGAGATGGGGG
>SRR492407.101319412
TTTTCAAGTTTTGAATCTTTGACTTTTTATAAATCCAAATATTTAATATTAAAATATTAATAAAATCACTCTTGACAGTAATATCTGTTGTATATGTAAAT
>SRR492407.101320582
TACATAATCTTCTTCTGTCCGAAGAAATGATTCATCGAAATAATGAGTCATCATTGATATCGACACATCTGAGATCGCCAAATGTTCGTGAGGTCCTCTAT
>SRR492407.101327062
AAGGTTCGTCCACGGAGGGTGAGTCAGGGCCTAAGATCAGGCCGAAAGGCGTAGTCGATGGACAACAGGTGAATATTCCTGTACTACCCCTTGTTGGTCCC
>SRR492407.101327782
ATCGGGAATTTCATTTTTTTTATTTGTTTTTGTTTTTGAGTCAATTTTCTTAGTTTTTATTGGCTCAAGGCTCTTAATTTTTTTTGTTTTCGGAACAGATT
>SRR492407.101334892
TTCTTGTCTATCGTTGGCCTCTATGGTAGAATCAGTCAGGGGCCTGATAGGCGGTGGGTTACCCTGTGGCGGAAGGCAGCGGGTCCGGGCCGCCTTTCTCC
>SRR492407.10134112
AGCACGGATACGGATGCTTTTTTTATCACCAAGTCAAGATGAATATTATATGATAGCGGCAGGGGAATTTTTTGGTCTTTATTTGGGGGTTTAAAAAAAAA
>SRR492407.101342042
AGTTGATAGGATCCCCTTTTACGCCCCCATGTCCCTCTCGTGTGGCGGCAGGGGGGCGGAAAAAGGGAAGAGAGGGATGGGGGTTTTCCCCGTTTTGGGTT
>SRR492407.101343182
AATGGGGTTTCCGGGATGTTATTCCCCCCTTTTTCGATCAATACTAATTTCGAGACAAATAAACTCCTTTTCTTTTCTATCAAATATATCAAAAAAACGAG
>SRR492407.101348652
TGCATTGTATATTTCCGGAATATGAGTGTGTGACTTGTTAGAATTGACCCTATGGATAAGACAGAGGATGGGGGCTTGTCACTTTTTTCAAAAGGGGTTTC
>SRR492407.101352132
TAACCACGCCAGGAAATTAAGAACATAAATCCTGTAGCCCAAACAAGATGCCCAAATAAGAACATCCATGCCCAGACTGATAAACTATTCATACCAAACGG
>SRR492407.101353592
TTTGGCCGATTGATTTTCCAATATGCTAGTTTCAACAATTCTCGTTCTTTACATTTCTTCTTAGCGGCTTTTTCTGGAGCTGGTGTTTTGTTTTTTCTTTT
>SRR492407.101353832
TCTTCGGATATAACCCATATAGGTTTGCCCGTTCTTTGTACATAAACCCTTGTGATGGTTTCGCGAAGTTTAAGTAATTCTTCCGCTTCCAAGATAAATTC
>SRR492407.101355902
CTGGGCCGTGTCTCAGTCCCAGTGTGGCTGATCATCCTCTCGGACCAGCTACTGATCATCGCCTTGGTAAGCTATTGCCCCACCAACTAGCTAATCAGACG
>SRR492407.101356082
TATTTTTAAACAAGGCCGTGTGATAAAAAAAGTAACCAAGATTGAGTGGGGATACAAAAAAAAAAGTATTATGAACTTTTTGATTGTAGCTAGTGAACGAG
>SRR492407.101363532
CGATTGCCACAGCTGTTGATTTAGGCATTTTGAAAATACGCCTTGCTAACCAATGGTTAACGATGGCTCTGTTGGGCGGGATTTCTCGAATAGGCAATAAA
>SRR492407.101364222
GTTCTTTCAAAATTGACTCTTTGTCCCTCTATTAGAGGAGTTCCAGAAATGTCTGCAATCGAGTAAATAGCTCTACGAACTAATGGATCGGAACCTATTTG
>SRR492407.101364992
ATCACTCTTGACAGTAATATCTGTTGTATATGTAAATCCTAGATATGACAATATGCGGAATTCATCCATGAAAATGAAAAACAAGGGGGGGGGGGTGGTCA
>SRR492407.10136832
AACAACACCAATCCATCCCGAACTTGGTGGTTAAACTCTACTGCGGTGACGATACTGTAGGGGAGGTCCTGCGGAAAAATAGCTCGACGCCAGGAGGATGA
>SRR492407.10137492
TCAAATTTAATTGAATGAACGGAAAAAATCATAACATACACAAAGTTTTCTTTGGTCTTTAATAATTTAGAACATTTTTTATTGACGAGCCACAGAAATTG
>SRR492407.101376792
TGGTTCAAAAATGCTGAATCTCGTCTGAATCATCATTTGTCAGGACTATTCGGGGTAAGCTCATTGGCTTTGGCAGGGGATTTTGTTCATGTTCCTATTCC
>SRR492407.101377042
TAAGCATGCCGCCAGCGTTCATCCTGAGCCAGGATCGAACTCTCCATGAGATTCATAGTTGCATTACTTATAGCTTCCTTCTTCGTAGACAAAGCTGATTC
>SRR492407.101377862
AATTCTAGTTACATTAAAAATTTAGCTAAAGATTAGATAAAAAAGGCGCGAACTCAAAAAAGAAATAAATAAAACCATAATCATAGAAATAGAGAATCCTT
>SRR492407.101380232
TTGAGTCTCTGCACCTATCCCTTTTTTCGCGCTTTGTAAACTCCGGTTTGTTCGCGTAAACCAGGATTTGGCTCAGGATTGCCCATTGTTAATTCCAGGGT
>SRR492407.101381732
AAGAAATGATTCATCGAAATAATGAGTCATCATTGATATCGACACATCTGAGATCGCCAAATGTTCGTGAGGTCCTCTATTCAATCCTTTTCCTTCTTCTT
>SRR492407.101384352
GAAGTATCATGCTCGTTTTCCTAATGGTGACACGAGGATTTCGAGTCCTCTGCAAAAAAGCTATGTCTACCTTTACTGAAGGATCATTATCATGTGACACA
>SRR492407.101386202
ATAGATAGATCACCCAGGTTCGGGTCCATAAGCAGTGACAATTGCCCTATGAAGACTCGCTTTCGCTACGGCTCCGGTCGGGTCCCTTACCCAAGACCCCG
>SRR492407.101389232
CTGTCGATAAGCTCCAATTGCATCATAGGAATTGCAAAAAAAGGGTTCTTTCGTATACTTATAGTTTGTTTCGTAAATTCTTTCATTTTGATAGTTTTTTC
>SRR492407.101389302
AATAATTCTATTAGGTCTAATGTAGTTATTAGATCTAATAAGTATAAGTTCCTTGTGTCAGAATTGAGAAATTCTATGGCTCCCAACCTTAATCTTCTCTT
>SRR492407.101393852
ACAAACAGATAAAGCAGCTAAACTATAAGACAAGTAAGCCTCCCCAGACCATACAAGTGCGCGGCGAGCCCATGCAAAAGGCTTGGTAAAGATAGGCAGAT
>SRR492407.101394322
ATCGACGAATCAAAACAATGATATATAAAGCAACGGAACCATCATAGTATTTTTTTAACTCCTACAAAAAAAAGAAGGATGGTAATTGGATGATTTAAGGA
>SRR492407.101395272
TCACTCTTGACAGTAATATCTGTTGTATATGTAAATCCTAGATATGACAATATGCGGAATTCATCCATGAAAATGAAAAACAAGGGGGGGGGGGGGGTGAA
>SRR492407.101404322
AATCCCTTACCTTGTGCCTTTTTATTTTTAATGGAAAAGGGGAGTTGTCCGAACTCTTGTTTTTAGTAATTTTTTTTTTTTTTTTACTTAAGTTGGGTTTT
>SRR492407.101408852
AGAGTTGGTTGTCGAGCCGTATGAGGGAGGAAACTCTCAAGTACGGCTCTCAGGGAGGGAATTGATCCGCCTATTCCGACCGTGGAGAACAGGCCATTCAA
>SRR492407.101412412
TTCTTCTTTTTGATCAATCAAAACCCCTTCCCAAACTGTACAAGCTTCTTCCAAAGCATACGGCTTTCTGGATGTAGATGATGATAGATCGGAAGAGCACA
>SRR492407.101416812
TTCGAGCTTTTCCTGGGAGTATAGCATGGGTTACTTCAGCGCCGTAGCGCCTGGTACTCGAACATTGGCTCGGGGGGCTTTTTCTTTCCCCTCCTTTCCCT
>SRR492407.101422192
ATATATTAAAATGATACTGATACTTCAGTAGATTATACTTCGGTAATGGTAGACATAGCTTAATTGCGGGGGACTGAAAATCCTTGTGTCACCATTAGTAA
>SRR492407.101427112
ACCAAGCTTGAGTACGGTAGGGGCAGAGGGAATTTCCGGTGGAGCGGTGAAATGCGTAGAGATCGGAAAGAACACCAACGGCGAAAGCACTCTGCTGGGCC
>SRR492407.101432622
CGACCATTACTGAGGTATCATCTACTGAAGTATCATCTTGCTTTTACTAATGGTGACATAAGGATTTTCAGTCCTCTGCAACTAAGCTATGTCGACCATTA
>SRR492407.101451802
CACAACGACGCAATTATCAGGGGCGCGCTCTACCACTGAGCTAATAGCCCGTCGTGCGGGGGGCCCTGCTGGCGGCGCGCCGCCCCACGCAGACTCGCGAG
>SRR492407.101452262
AGTCGTTACCTTAACCGCAAGGAGGGGGGTGCCGAAGGCAGGGCTAGTGACTGGAGTGAAGTCGTAACAAGGTAGCCGTACTGGAAGGGGGGGCGGGGGGG
>SRR492407.101452852
TGTCTACCAATTTCACCATAGCGGCAACTTGTTCAAAACAATATTAACAAGTTTTGATTCAATCGTCGAGATTAAAATTTAAATAAAGAAGCCAATTTATT
>SRR492407.101452932	Yes
TGTATCTACATATTTGCAGTACGTTCTTTTTTTTCCATTCATTCCTTTCAGGATCAGTCGTGGTCTTACAAACTCTACCGCAGATCTGGACGAATCCTTTT
>SRR492407.101453432
ACCCTATACCCTGAAATTTGACCTTTTTTTCTTACCCCTTCTCTGTCATTTATGCAAAAAAAAAAAAAAATGGTTATGTAAACACCAATTTTTTGGCCCGG
>SRR492407.101455472
TTCTTTTCCCAGAGAAGAAGCAATGACGGTATCTGGGGAATAAGCATCGGCTAACTCTGTGCCAGCAGCCGCGGTAATACAGAGGATGCAAGCGTGATCCG
>SRR492407.101459512
ATCACTATCTATCGATATATCGAGATAGATACTTAATTTATAATTTAGAATAAACCTTTTTCTTCATTAATTTTCATAGTTGTAATTTTTTTATATGAATT
>SRR492407.101464272
TAAACTCCTTTTCTTTTCTATCAAATATATCAAAAAAACGAGCATAAAAGAAGAGATGAATATTCAATTGAAAAAAAAAAGAAAGAAATTCTTTCGTTTTT
>SRR492407.101467372
GTATCATCTACTGAAGTATCATCTTGCTTTTACTAATGGTGACATAAGGATTTTCAGTCCTCTGCAACTAAGCTATGTCGACCATTACCGAAGGATCATCT
>SRR492407.101474312
AAATAGAGTTCTAAGGAGAATGAGCTCGGGGAAGGTAGAGTAGAAATTAGTATTAAAAAAAAAGTCGTCAAAACAAAACGAGAGTATATAGTTTCGAAAAA
>SRR492407.101475612
AATTCTGATTAGTTGATAATTTTGTGAAAGATTCCTGTGAAAAAGGTTAATTAAATCTATTCCTAATTTATGTCGAGTAGACCTTGTTGTTAGATCGGAAG
>SRR492407.101477182
AACTATACCCTATACCCTGAAATTTGACCTTTTTTTCTTACCCCTTCTCTGTCATTTATGCAAAAAAAAAAAAAAATGGTTATGTAGCCAGCTATTTATTG
>SRR492407.101482822
AAGGTAACGACTTCGGGCATGGCCAGCTCCCATAGTGTGACGGGCGGTGTGTACAAGGCCCGGGAACGAATTCACCGCCGTATGGCTGAACCGGCATTTCT
>SRR492407.101492502
CTTTGTCCCGGCCATTGTAGCACGTGTGTCGCCCAGGGCATAAGGGGCATGATGACTTGACGTCATCCTCACCTTCCTCCGGCTTATCACCGGCAGCGCGT
>SRR492407.101504852
GGAACCCTGAACAGACTGCCGGTGATAAGCCGGAGGAAGGTGAGGATGACGTCAAGTCATCATGCCCCTTTTGCCCTGGGCGACACCGGTGCTACAATGGC
>SRR492407.101506612
AGGCGTCCTTGGGGTGATCTCGTAGTTCCTACGGGGTGGAGACGATGGGGTCGGTCCATGGATTTTCCTTCCTTTTGCCGCATTTCGCTCAAAGGGGTGAA
>SRR492407.101507572
TTCATATCATAACATATGAACAGTAAGAACTAGCATTCTTATTGAGACTAGAACTCATAGGGAAGAAAATAGATCGGAAGAGCACACGTCTGAACTCCAGT
>SRR492407.101509622
TAACTTTAAGGCTATGCCATCCTAAGGTGCTGCTAAATGGAAAGATCTTATCAACGTCCATGAATGAAAAATCATAGATCGAACTGCCGAATCGGAAAAAT
>SRR492407.101509882
ACTGAAGTATCAAGTATCATCTACTGAAGTATCATGCTCGTTTTCCTAATGGTGACACGAGGATTTCGAGTCCTCTGCAAAAAAGCTATGTCTACCTTTAC
>SRR492407.101510582
ATAAGGCATCCTCCGGATAATTCAAATCTAAGCAATTAGATGTCCGACTCGGGCCTATATGACATGACCGATCAATAGAAATAATTCAACACTCAACTTTT
>SRR492407.101512862
CAGAATGAGACGGGATAACAAAAAAAAATAGATAAATTTGAATAACCGTACAGGCTTTTTTTGTGCATTGCATACGGCTCCACAATGGAATTGACATTTTT
>SRR492407.1015132
CAATGGAGGAACAATATCACCATTTTTGTTCAATAAAATACCAAAGTGGATGATTGACTCATTCCATACTAGAAAGAATCGCAGGAAAAGATCGGAAGAGC
>SRR492407.101513092
TACTTGTGATATTTCGGCTTGGGACGCATTTTATTTGGCAGTTTTCTGGATGTTAAATACTATTGGATGGGGTTATTTTTTTTTGCATTTGGAAAACAACA
>SRR492407.10151392
ACTGGGCAGGCGTCAGCCCCCATACNNNNNNNNNCGACTTTGCGGAGACCTGTGTTTTTNNNNNNNNNTCGCCCGGGCCTGGTCACTGCGACCCCNNNNGT
>SRR492407.101514652
AAGTTGTCATAAAATGGGTACCTCAATTTAATATTTGTACCTGTTATTGTTATATTCTGAATTCTAAAGATATCTTAGAATATCTTGTATTTTTATTATTT
>SRR492407.101520812
GCTGAATCCATGGGCAGGCAAGAGACAACCTGGCGAACTGAAACATCTTAGTAGCCAGAGGAAAAGAAAGCAAAAGCGATTCCCGTAGTAGAGGCGAGCGA
>SRR492407.101521952
CTTTGTATCGCGCACATAACTTAGTCAACTTTAGTCACATAACTGGGAATGAATAAATAAGATCGGAAAGCAATAAATGAAGGGGGGGGGATACAATTCTA
>SRR492407.101524602
CGATGATCAGTAGCTGGTCCGAGAGGATGATCAGCCACACTGGGACTGAGACACGGCCCAGACTCCTACGGGAGGCAGCAGTGGGGAATTTTCCGCAATGG
>SRR492407.101528752
CTTGCGTCCTTGAACCGATAACCATCTTTCGGCTAACCTAGCCTCCTCCGTCCCTCGGGACCAACAAGGGGTAGTACAGGAATATTCACCTGTTGTCCATC
>SRR492407.101529242
CTACGCCTAGGACACCAGAATATCGAACCATGAACGAAGAAAGGCATGCGAGAAAAGCATATTGGCTAATGGTTGTGAGGGCCCCATTCTTCAACTGGGTG
>SRR492407.101530182
GGTTATGCACTCTTCGAATAGGAATTCATTTTCTGAAAGATTCTGGCTTTCGTGCTTTGGCGGGGCCCCCAGGTTCTTTCGACGCCCCCTGTTGTGTTTGA
>SRR492407.101530842
ATAGAAATAGAATTGTATCCCCCCCCCTTCATTTATTGCTTTCCGATCTTATTTATTCATTCCCAGTTATGTGACTAAAGTTGACTAAGTTATGTGCGCGA
>SRR492407.101536912
ATATATCTAATATTAATATACAACCTAATAGAAATATATAGAATAGAACCGAATAGAAATAGAATAGAAATAGAATAAAAAAATAGGTACAAAAAAAGCCA
>SRR492407.101551252
ATATAGGTGGATTCCTTTATATTAAGATATTTCACTTGTATCTTTATACATTACAATAACCATAATGGCTAAAAAAATAAGAAAAGAAAACTTTTTTTCCA
>SRR492407.101551772
GGGGTCGGTCCATGGATTTTCCTTCCTTTTGCCGCATTTCGCTCAAAGGGTTGAAGGGAGATAGTGCATCAAGCTGTTCGCAAGGGCCAACTTGATCCTCT
>SRR492407.101552122
TTAACGCGTTAGCTACAGCACTGCACGGGTCGATACGCACAGCGCCTAGTATCCATCGTTTACGGCTAAGAACACCGGGGGTTCTAATCCCCATTCCCCCC
>SRR492407.101555022
ATAGTTCAATGTGCTCATCAGCGCCTGACCCTGAGATGTGGATCATCCAAGGCACATTAGCATGGCGTACTCCTCCTGTTCGAACCGGGGTTTGAAACCAA
>SRR492407.101555702
TCCTCTGCTCTACCAACTGAGCTATCCCGGCGAAGGATCATCCTCGTTTTACGAATGGTGGCACAACGATTTCAAGTCCCCCGGAAAAAAAGATCGGAAGA
>SRR492407.101560032
ATAGATAGATCACCCAGGTTCGGGTCCATAAGCAGTGACAATTGCCCTATGAAGACTCGCTTTCGCTACGGCTCCGGTGGGGTCCCCTAAACCACCCACCG
>SRR492407.101561372
CGGGAATTTCATTTTTTTTATTTGTTTTTGTTTTTGAGTCAATTTTCTTAGTTTTTATTGGCTCAAGGCTCTTAATTTTTTTTGTTTTCGGAACAGATTTA
>SRR492407.101562532
AGTAAGCCCACCCCAAGATGAGTGCTCTCCTATTCCGACTTCCCCAGAGCCTCCGGTAGCACAGCCGAGACAGCAACGGGTTCTCCGCCCCTGCGGGGATG
>SRR492407.10156412
AGATCTAATAAGTATAAGTTCCTTGTGTCAGAATTGAGAAATTCTATGGCTCCAATCTTTTGTATTTTTTTTTTTATTTTCTGTGTCTTCTATTTTTTCAG
>SRR492407.101566502
GGGGACAGGGATTTCTTCTTGTTTTCTTTATTATTGATAGGAATTCTCTTGTTAAGACCCTACTTAACTAATCAATTGAAACCTCAGATTCATAAGAGAAC
>SRR492407.10156792
TTTCCCGAAAGAGATCTTGTGGGAAGAGTGTTGCCAAATTTATACTGTCCGCTATCTCATAGGTGGCTACGGGCCGCACCCAAAGATCGGAAGAGCACACG
>SRR492407.101569222
GATTTTATTCCCTTCCATCATTCTTAAGTCCCATAAGTTTGATCCTATAGAATCTGACCCATTTTCTCATTGAGCGAAGGGGTACGAAATAAATTCAATCA
>SRR492407.101573752
ATCTACTGAAGTATCATGCTCGTTTTCCTAATGGTGACACGAGGATTTCGAGTCCTCTGCAAAAAAGCTATGTCTACCTTTACTGAAGGATCATTATCATG
>SRR492407.101577102
ATAATAGGCATATCGAAATTATTGTACGTCAAATAACATCAAAAGTTTTGGTTTCCGAAGAGGGAATGTCTAATGTTTTTTTACCTGGAGAACTTATTGGA
>SRR492407.101582102
TGTTCTACGCCTCCGAGCTATATATCCGCGTTTAATTCTAGTCATTGAATAAATCAAACTTTGATGAATAACTAATTCTTTTTTTAGAGATCGGAAGAGCA
>SRR492407.101583002
CTATTAGGTCTAATGTAGTTATTAGATCTAATAAGTATAAGTTCCTTGTGTCAGAATTGAGAAATTCTATGGCTCCCAACTTTTTTATTTTTTTTTTTTTT
>SRR492407.101583842
TAAATGACTACTCGAGTCGGGGTTTTGAGCATAAAGATTCCACTGACCCGTAAAAAGTGGGCCTAACCCTTGGGGATGCGGTAATACATTTAAGAAATTAT
>SRR492407.101586562
TATAATTATAAGTTATGAAAGGTAATCGAAAAGTATGCGGATTCAGTGGAAAGATGAAAGAAAGAGAGAAAAAATTGAATATTAATGATATATGATTCCAA
>SRR492407.101594252
TGGTAGAAGTACCACACGAGTGGATATATAGGAATCAAAATCTGCCGAATAACTTATGTTATGATCTTCTACATCCTAGGTCTTAGATCGGAAGAGCACAC
>SRR492407.101595392
TCATGGCATGCTCAATTATCTCTTAACCTAGCTATGTTAGGCTCTTTAACCATTATTGTAGCTCACCATATGTATTCCATGCCCCCTTATCCATATATAGC
>SRR492407.101595472
CCTGATCTTAGGCCCTGACTCACCCTCCGTGGACGAACCTTGCGGAGGAACCCTTGGGTTTTCGGGGCATTGGATTCTCACCAATGTTTGCGTTACTCAAG
>SRR492407.101597072
CCCTTTCCTTCTCTTTACGATGATAAATAACCTACTTAACTCAGTGGTTAGAGTATTGCTTTCATACGGCAGGGGGCCTTTGGTTAAAACCAAAAATAGGG
>SRR492407.101598182
TGTGGAGCCGTATGCAATGCACAAAAAAAGCCTGTACGGTTATTCAAATTTATCTATTTTTTTTTGTTATCCCGTCTCATTCTGCGAAATAGAAAAACCTT
>SRR492407.101601272
GTAAAACCGGCTTGATTTAGATCGGGAGAATCGTACGGTTTTATGAAACCATGTGCTATGGCTCCGCACCCCAGGTCATCCCTTTTCCCACACGAGGAGTT
>SRR492407.101604232
TTGAACTTATACTCAATGCAGTTAATATGAATTTCGTAACATTTTCTGATTTTTTTGATAATTCCCAACTAAAAGGGGAAATTTTCTGCATTTTTGTTATA
>SRR492407.101604932
TAAAAAAATAGGTACAAAAAAAGCCAAACTAAATAAATGGACTTATTCATCTTTCAAAATCAACTACAACTAGATGTATCATAATCCCCTTGTTAGATTTA
>SRR492407.101605862
ATCTACTGAAGTATCATGCTCGTTTTCCTAATGGTGACACGAGGATTTCGAGTCCTCTGCAAAAAAGCTATGTCTACCTTTACTGAAGGATCATTATCATG
>SRR492407.101608732
TACCACGAATGATTTTCCTTGGTTAACAATAATTGTTGTTTTTCCAATATCTGCTGGTTCATTAATGTTATTTCTCCCGCATAGGGGAAATAAAGTCAATA
>SRR492407.101614602
AAGGTCACTCCACTCTATTTCGACAAAAGACCCATCCCCAAGTTCCATAGCTTTGAGTCCGCTATCGCTATCCCGAGCATGATTTTCCTACCCCCCCGGAG
>SRR492407.101621402
TTGTAGCGGTTCAATAAAAAATAGGAGCGATTTCATGCAAATCTACAATTTAGAATTTTATATCTTTTTAGATTAAAGGTTTAGTTTAATATTCTCTTCAA
>SRR492407.101624672
GATCTATGCTAAGATCATTTATTTACAACGGAATGGTATACAAAGTCAACAGATCGTAATGAATACAAAATAAGATTTATGGCTAAAAAAACATGTTAAAA
>SRR492407.101625692
GTTCCCATCGCTTCTTGATTAATCATTAGGCCCGAATTCTACAATGGAGCTCTTATATGAAATCGGGAATTTCATTTTTTTTATTTGTTTTTGTTTTTGAG
>SRR492407.101628932
AACCTAATAGAAATATATAGAATAGAACCGAATAGAAATAGAATAGAAATAGAATAAAAAAATAGGTACAAAAAAAGCCAAACTAAATAAATGGACTTATT
>SRR492407.101630732
CACTCGCCATCTATTTTCATAGTTCAACTCTTTGACAACACGAAAAAACCATTGTTCAACTCTTTGACAACATGAAAAAACCTAAAATTCTGCCCTTCTAT
>SRR492407.101632102
CATAAGGTAAATCAGCCGCTATTCCTCCAATACGAAAAAAATTATGCATCATTCTCATACCGGTGGCAGCTTCGAATAGATCATATACAAATTCTCGTTCT
>SRR492407.101634882
CAACTGCTGCGCCTCAACGCATTTCGGGGAGAACCAGCTAGCTCTGGGTTCGAGTGGCATTTCACCCCTAACCACAACTCATCCGCTGATTTTTCAACATC
>SRR492407.101637782
TAGTGATCTTGGCGCAGTGAGTCCTTTCTTCCGTGATTAACTGTTGGCACCAGTCCTACATTTTGTCTCTGCGGACCGAGAAGAAAGGAGGCTCAGCGGGA
>SRR492407.101638742
GAATCCTCATTACTAATGGAATCGAAAGGATCTATGAATTGATCAGAAGATCCGTTCAATTGGCTAGAATCCGGTACCTCAACGACACAACATCTTGTAGA
>SRR492407.101645582
ATTCGCATCATTATGTTCGATAAAAGGAATTAGAGAAGCTCCAATGGAAAAATATTGGAAAGGGAAAATGCTTCGAAGATGAACCTCTTCCCATGCGATAG
>SRR492407.101646152
AACTTATAATATCTCTTTTAGAAGATCTTATGCCGCTACTCGGACTCGAACCGAGATGCTCTAGCACTGCTTCCTAAGAGCAGCGTGTCTACCAATTTCAC
>SRR492407.101651212
CGTGAAATAAAAGTAGGTGATAAAGTAGCTGGAAGACATGGAAATAAAGGTATCATTTCAAAAATTTTGCCTAGACAAGATCGGAAGAGCACACGTCTGAA
>SRR492407.101652032
TCATAAAATGGGTACCTCAATTTAATATTTGTACCTGTTATTGTTATATTCTGAATTCTAAAGATATCTTAGAATATCTTGTATTTTTATTATTTCTATTA
>SRR492407.101658022
AATTCTTGACGATGAATCGATTTTATAGCTCCGATATTGTTATTCATGATATTTCTTTCATTCGATATCATCGCAATCTAATTCATCTGAGTAAGTTTACA
>SRR492407.101660702
GAGAAACTCAAGGCCACTATTCTTGAACAACTTGGATTGGAGCCGGGCTTTCCTTTCGCACTTTATACGGGTATGAAATGAAAATAATGGAAAAAGTTGGA
>SRR492407.101661602
GTCCCGAGGGACGGAGGAGGCTAGGTTAGCCGAAAGATGGTTATCGGTTCAAGGACGCAAGGTGTCCCTGTTTTTTCAGGGTAAGAAGGGGTAGAGAAAAA
>SRR492407.101662142
CGACCATTACTGAGGTATCATCTACTGAAGTATCATCTTGCTTTTACTAATGGTGACATAAGGATTTTCAGTCCTCTGCAACTAAGCTATGTCGACCATTA
>SRR492407.101666022
ATGGAGCCAATCACTATCTATCGATATATCGAGATAGATACTTAATTTATAATTTAGAATAAACCTTTTTCTTCATTAATTTTCATAGTTGTAATTTTTTT
>SRR492407.101669132
ATGGTCGAGGTAAGATTTCCGCTTCTGAATCTCGGTTAATTGAATCTCCTGCCCCAGGTATTATTTCGAGACGTTCTGTATATGAGCCTCTTCAAACAGGA
>SRR492407.101671922
TGGAAAAGGGGAGTTGTCCGAACTCTTGTTTTTAGTAATTTTTTTTTTTTTTTCACTTAAGTTAGGTTTATTAAGTCTGTCGAGAGTAATATTCTATGACA
>SRR492407.101673872
AATGAGGCTACTATGAAATATTTACTCATGGGTGGGGCAAGCTCTAGATCGGAAGAGCACACGTCTGAACTCCAGTCACCTTGTAATCTCGTATGCCCTCT
>SRR492407.101678622
CAAAATAATTCTATTAGGTCTAATGTAGTTATTAGATCTAATAAGTATAAGTTCCTTGTGTCAGAATTGAGAAATTCTATGGCTCCAAACTTTTGTTTTTT
>SRR492407.101682352
AAAAACTAAAAGAAAATCATGTATTGGTCCAGGCAAATCCATTATATTATTAAAATAAGAAAAAATCGAAATCCTTTTCATGACCTTATTAATTTAACCAG
>SRR492407.10169022
CACATTCCAATATGAAGGGTTAGTCAATCAAATAATAGATAGGAAATGCGTCGGTTTGAAAATAAATGAATTGCTTGTCGTAGAATATTACTCTCGACAGA
>SRR492407.101691332
TTAGCACGGTTAATAATATCAGCCCAAGTATTAATAACACGTCCTTGACTATCAACTACTGATTGGTTGAAATTGAAACCATTTAGGTTGAAAGCCATAGT
>SRR492407.101693532
TCTATAGGAACTATTTTACTGACGGGATTTATTACTACTTTAGCCACTTTAGCGGCTTTTTCAGTTACTCCGGGTTTCCGATTTTTTCATTTTCTTGTTTT
>SRR492407.101694902
GCTGGATAGATACCTTTGGCAGCTAATCCTCTTGATAGTACGGTAGTCGCATCTCAATGTGCAAATGTGGTGGCAGGGTGGGGGGCAAGACAAACAACCTC
>SRR492407.101699712
ATTTCGAGTCCTCTGCAAAAAAGCTATGTCTACCTTTACTGAAGGATCATTATCATGTGACACAGGGATTTTCAGTCCCCCGCAATTAAGCTATGCCGACC
>SRR492407.101700692
AAATAAAATTATAGGAAACTGTAAATGAGAGTTTCTTTCTCACATACACCTTCGATCACATTACATTGTCATCTCGGATGCATCAATCTGGAAATCTTTAA
>SRR492407.101710162
CCTTCTCTTGAATTCTCAAAACTTCTGTCACTCCATCCCCGCAGGGGCGGAGCACCCGTTGCTGTCTCGGCTGGGCTTCCCGAGGGTCCGGGGGGGGACGG
>SRR492407.101710172
GAACGTACTCCCCAGGCGGGATACTTAACGCGTTAGCTACAGCACTGCACGGGTCGATACGCACAGCGCCTAGGATCCATCGTTTACGGCTAAAAAAAACA
>SRR492407.101712892
ACCTTTCCCTAGTACGAGAGGACCGGGAAGGACGCACCTCTGGTGTACCAGTTATCGTGCCCACGGTAAACGCTGGGTAGCCAAGTGCGGAGCGGATAACG
>SRR492407.101714742
AAGGTCTATCTATTTTATTTAGTTATTCAGTTGATTCGTTATAGATCGGAAGAGCACACGTCTGAACTCCAGTCACCTTGTAATCTCGTATGCCGTCTTCT
>SRR492407.101721792
CATTAGTAAAAGCAAGATGATCCTTCGGTAATGGTCGACATAGCTTAGTTGCAGAGGACTGAAAATCCTTATGTCACCATTAGTAAAAGCAAGATGATACT
>SRR492407.101723732
GTCAAACCTAAATACCCAAGAAGCATTAGCTCTCCCTGAAAAGGAGGTGATCCAGCCGCACCTTCCAGTACGGCTAACCTTTTAACACTTTCCTTCAATCC
>SRR492407.101727672
CATATCGGTTGAAGTAGATTCTTCTTTTTGATCAATCAAAACCCCTTCCCAAACTGTACAAGCTTCTTCCAAAGCATACGGCTTTCTGGATGTAAGATCGG
>SRR492407.101739712
CTTCTTTTTCAAGTTTTGAATCTTTGACTTTTTATAAATCCAAATATTTAATATTAAAATATTAATAAAATCACTCTTGACAGTAATATCTGTTGTATATG
>SRR492407.101745902
TTTTCTATTTCGCAGAATGAGACGGGATAACAAAAAAAAATAGATAAATTTGAATAACCGTACAGGCTTTTTTTGTGCATTGCATACGGCTCCACAATGGA
>SRR492407.101753272
CTCTCGGACCAGCTACTGATCATCGCCTTGGTAAGCTATTGCCTCACCAACTAGCTAATCAGACGCGAGCCCCTCCTCGGGCGGATTCCTCCTTTTGCTCC
>SRR492407.101753862
AGAGATATTATAAGTTTTATAATCAAAATAATACCCGACTTTTTTCTAAAATCGGGTAAAACCTAGTATTAATTCTTTAATTTTAACCAAATTTTTTATAT
>SRR492407.101753972
CGCGAATCCTCTTGAAAGAGAGGGGTGCCTTCGGGAACGCGGACACAGGTGGTGCATGGCTGGCCTCAGGTCGTGCCGTTAGGGGGTCGGTTAAGTTCGGC
>SRR492407.101755812
GAAGCTTTTTGACCAATAGCTACATAAACACATATTACATTTTGGCCTTGTTGATTGAGAATTGTATCTGTGGCTAATACTGTTTTTTCCGGCTGTTTGTT
>SRR492407.101755932
TATCGCTGCAAACCCCGAGATATTATTACAGTGAAGGATGAACAAAACTCTAGAACTTTGGTTCAAAATCTTCTTGATTCATCTGCCCCTGAGGAATTGCC
>SRR492407.101755942
TAACGCTGCAAACCCCGAGATATTATTACAGTGAAGGATGAACAAAACTCTAGAACTTTGGTTCAAAATCTTCTTGATTCATCTGCCCCTGAGGAATTGCC
>SRR492407.101756132
TCGGTGGATACCTCTTGGTCCTGTTTAGTCCCACCCGTTTCTGAGGTTCCTTTAAGTTTCTTAGTAAAAATGGGTGATGGTATTCTGCCTAAATAGTAGAC
>SRR492407.101762332
AGGAATTTCAATTGCGCTTATATTCATCACTGTAGGAATTGGGTTCAAGCTTTCCCTAGCCCCTTCTCATCAATGGACTCCTGACGTATACAGATCGGAAG
>SRR492407.101762802
AGTTCGATCCTGGCTCAGGATGAACGCTGGCGGCATGCTTAACACATGCAAGTCGGACGGGAAGTGGTGTTTCCAGTGGCGGGGGGGGGGGGGACGCGGGA
>SRR492407.101763222
AGGTATACCTATAGGATAAAAAGGTAAAATTTTGAGTAAGTTCTTAAGTATAAGTTAATAAGGGGACAGCCATTTTCTAGACTCCATAATAAGTAGATCGG
>SRR492407.10177252
AGTGTGACGGGCGGTGTGTACAAGGCCCGGGAACGAATTCACCGCCGTATGGCTGACCGGCGATTACTAGCGATTCCGGCTTTCTGCCGGGGGGGTGCGGG
>SRR492407.101772662
ACCGTCGAGAAACGAAAGAAGGCTTCCACCTCCAAGTTTAACTCAGACGTAGCTCCCTTCTTTTTGGGTGTGAAGCTGTGTCAAACCTAAATACCCAAGAA
>SRR492407.101779852
GGGAGCTTACGGTTTCATGTTCTATTTCACTCCCCGATGGGGGTTCTTTTCACCCTTCCCTCACGGTACTACTTCGCTTTCGGTCAAGATCGGAAGAGCAC
>SRR492407.101780202
TCGAAAAGTATGCGGATTCAGTGGAAAGATGAAAGAAAGAGAGAAAAAATTGAATATTAATGATATATGATTCCAATTTGGAAAGTCTATGAGGTCACTGT
>SRR492407.101784432
GGATCGAGTATTAGAACGGAAAAATCCATTAGATAATGAACTATTGGTTCTAAGCCATCTCTGGCGCTGAATCAACAATTCGAAGTGCTTTTCTTAGATCG
>SRR492407.101788312
TTCTAGAATGTCTAATATCTTTTTTACATCTTCTACGTGAAAATGTTCAATTTTGATAAGGTCTTCTTGACTGTTATTCAAAAGGTCCAATAATGTATGTA
>SRR492407.101794022
GTAACCCATTACCTTCTGGGTGGAATTGCCACAACATGGGCGTTCTTCTTAGCAAGAATTATTGCAGTAGGATAATGGCTAGGAGGAATTTGAAGGTCAAT
>SRR492407.101795772
CCGCGGCTGCTGGCACAGAGTTAGCCGATGCTTATTCCCCAGATACCGTCATTGCTTCTTCTCTGGGAAAAGAAGTTCAGGACCCGTAGGCCTTCTACCTC
>SRR492407.101801992
GGAAACCAAGAGTTTCGTGGTTCAAAAATGCTGAATCTCGTCTGAATCATCATTTGTCAGGACTATTCGGGGTAAGCTCATTGGCTTTGTCCGGGGCATTT
>SRR492407.101805452
TTAAGTTTTTTTTTGTCGTGGAAATCTTTGTTCTATTCTTAATATTTGTTCTATTCTTAATATATGTATATAAATTATTGTAATATGGAATTATAATTCAC
>SRR492407.101816112
TTCGCCTAGCAGCACGACGCTTTTTTTGCTCTCCCACAACCCCGTTTTCACGGTTTAGGCTGCTCCCATTTCGCTCGCCGCTACTACCGGAATCCCCTTTT
>SRR492407.101817992
CTACTTCTGCAGCTATTGGATTGCATTTTTACCCAATCTGGGAAGCTGCATCCGTTGATGAATGGCTATACAATGGCGGGCCTTTTGGAACAAATGTTTTT
>SRR492407.101823362
CCAATACGAAAAAAATTATGCATCATTCTCATACCGGTGGCAGCTTCGAATAGATCATATACAAATTCTCGTTCTCTGAAAATATAGAAAAAGGGAGTCTG
>SRR492407.101831182
AAGAGACAACCTGGCGAACTGAAACATCTTAGTAGCCAGAGGAAAAGAAAGCAAAAGCGATTCCCGTAGTAGCGGCGAGGGGAAAGGGGGGAGGGCAAACC
>SRR492407.101833352
TTAGATAGTGTGCATAAATCTCATGATAGTTACCAAAAGATTCATAGTGAACTTCGATAGGAACTTCTCTTGAAGCAATAACGCGTTGATCTAATTGCCAC
>SRR492407.10183562
ATTAGATCGTATATCTTTCTTGGTATATCCAGATAATAGGTAGGAGCATAAACTGAAACATTCTGGAGCTACAAAGATAGTTATTAAATAGATCGGAAGAG
>SRR492407.101837912
TATGCCGCTACTCGGACTCGAACCGAGATGCTCTAGCACTGCTTCCTAAGAGCAGCGTGTCTACCAATTTCACCATAGCGGCAACTTGTTCAAAACAATAT
>SRR492407.101839502
CGAATCAAATCTCTTTTGAAAGAAGATCTTTTGTCTCGTGGTAGCCTGCTCCAGTCCCCTTACGAAACTTTCGTTATTGGGTTAGCCATACAGATCGGAAG
>SRR492407.101840362
ACTCAAAATCTCGTGCTAAAGAGCGTGGAGGTTCGAGTCCTCTTCAAGGCATAATATTGAAATGGAATAAGTTCGGCAGCGGATCGCGGAAAATTAGCGGA
>SRR492407.101843902
CATCCATGCCCAGACTGATAAACTATTCATACCAAACGGGTTATATCCATTGATAAGTTGTGAAGAGTTTAACCATAGATAATCTCTTAACCATCCCATCA
>SRR492407.101844462
TTCTCTCTTTTTTTTTTTCGTTATTTCGCTTGTGGTCCTAAGAAAAGGGAATTTGTCGATTTTTCGGGGTCTTAAAGGGGCGTGGAAACACATAAGCACTA
>SRR492407.101844612
ATGATCCTGAACCGATCTTACCTGGGATCGCAAATCCCAAGTTTGTCTATGAAGAGCAGATCTAATTGTATTAGTGTCTATAATTGAGATCGGAAGAGCAC
>SRR492407.101847642
GAAAAACTTCCCTGACCAATTGGATAGATCAAGAAAACAGCAGTCGCAGCTGCAACAGGAGCTGAATATGCAACAGCAATCCAAGGACGCATACCCAGACG
>SRR492407.101847822
AGCTAATCAGACGCGAGCCCCTCCTCGGGCGGATTCCTCCTTTTGCTCCTCAGCCTACGGGGTATTAGCAGCCGTTTCCAGCTGTTGTTCCCCTCCCCAGG
>SRR492407.101849312
AAACGGATTACTAATCCTTAACTTTTCGAGGAATCCTTCATCAGTGGTTGTGAATGACTGATTTTTCTCAATCTTTTCGACCTTGGTTCCGTAGGAGCACG
>SRR492407.101850192
TGGCCTCTATGGTAGAATCAGTCAGGGGCCTGATAGGCGGTGGTTTACCCTGTGGCGGAAGTTAGGGGGTTGGGTTCGGCTTTTTCCCACCTGGTGGGCTT
>SRR492407.101856982
ACCTATTCTGGGACATACAATGCATTACAGACGTATGATCATTACGCTTCAACCGGGTTATTCTATTCCACCTCTTAGAAAGAAAAGAACTTAAATCAAAA
>SRR492407.101860062
TGGTCAGAGGCGAATTGAAAGCTAAGCAGTGGTAATTCTAAAGATTCCCCCGGGGAAAAAAAAGGAGGTCCCCTCGGTTACCCTTATTATGTGGAAGAACG
>SRR492407.101861662
AGAATATTAAGAACTTTTTTAGTAAAATCTCGTATACTAATATAAAAAAAAAATTTTTTTTTTTCCAAACCGGAATGAAAAAAAAAGGCAAAAAGCCGGGA
>SRR492407.101861862
GAACTCTCCATGAGATTCATAGTTGCATTACTTATAGCTTCCTTCTTCGTAGACAAAGCTGATTCGGAATTGTCTTTCATTCCAAGTCATAACTTGTATCC
>SRR492407.101862772
AATACGACCACCGGGTTTTATTATTGTGCAACGTCTTCCTGAACTAGTTAAAAGAATGATATTGGCTGATATTATGACTATACTCGGCAGCATAGAAAGAA
>SRR492407.101864392
AGCCGAGACAGCAACGGGTTCTCCGCCCCTGCGGGGATGGAGGGACAGAAGTTTTGAGAATTCAAGAGAAGGTCACGGCGAGACGAGCCGTTTATCATTAC
>SRR492407.101864772
TTAGTTTACATATATATATATATATATTATAGTAGTTACTTTTTGTAGTTTTCTTTTTTTTTTTTCAATTTTGATGAAATACTAAATAAATAAAATCAGAA
>SRR492407.101869442
AAGGGAAGGACCTTTCCCTCCGGGGGGGTAGGAAAATCATGCTCGGGATAGCGATAGCGGACTCAAAGCTATGGAACTTGGGGATGGGGCTTTTGTCAGAT
>SRR492407.101870352
GTTCGAACCGGGGTTTGAAACCAAACTTCTCCTCAGGAGGATAGATGGGGCGATTCAGGTGAGATCCAATGTAGATCCAACTTTCTATTCACTCGTGGGAT
>SRR492407.101877112
GCTTCCAAGATAAATTCTCCCGTTTGTGCCTCATAAAACGAACTAGCGGGTTGATGGATCATTACCCTGATGATATAATAGAAAAGGTTTTTCTATTTCGC
>SRR492407.101877302
TGGACGAATATGCAAGCATACGTTTCATGCTTGTTTGAGTAATAGCAATGAGATTCCCCAATATCATGCTAAGAATAGCTAGGATTTCCAGAAGAAGATGC
>SRR492407.101882142
TACAACGGAATGGTATACAAAGTCAACAGATCGTAATGAATACAAAATAAGATTTATGGCTAAAAAAACTTTTGAAGAAAGATTTAGATCTGGGCCCAGAA
>SRR492407.101882582
CAAAATGGATCCGTTTATCATAAAGAGATTCGTTGTTCCTGACCCTGCTTCACCTTAATTGTTATTTGAACAAGTCAAAGTTCTGTCTAGATCGGAAGAGC
>SRR492407.101882652
TCTCTTCAATATAAAAATAAAAATAAAAAAATATTGAAGAGAATCTTGAAGAGAAGTAATTCAGAATTAGCCGGTTAGAACTAATCTAAACCAGCCCATTA
>SRR492407.101883882
AATATGTCTACGCTGGTTCAAATCCAGCTCGGCCCAATAATTAGCTGTCTACATAACCATTTTTTTTTTTTTTTTCATAAATGACAGGAAAGGGGGAAGAA
>SRR492407.101886472
AAGCGATCTGCCGAAGCTGTGGGATGTCAAAATGCATCGGTAGGGGAGCGTTCCGCCTTAGGGGGAAGCAACCGCGCGAGCGGCGGGGGGGGGAGGGGGAG
>SRR492407.101889112
ACAATTCCTTTGTTTGTGAGAAAATTTTCTCACAAAAGAAAAGGTAAAGGAAATAAAAAGAGTTAGAGAATGGATTACTACCTATGCCAAGATCGCGTATA
>SRR492407.101895622
TAGCTCCATGGAACAATATGCTACTACTGAAACATGGAAGAATTGAAATCTTAGATCAAAACACTATGTATGGATGGTATGAACTGCCTAAACAAGAATTC
>SRR492407.101899142
ATGATACTGATACTTCAGTAGATTATACTTCGGTAATGGTAGACATAGCTTAATTGCGGGGGACTGAAAATCCTTGTGTCACCATTAGTAAAAGCAAGATG
>SRR492407.101901982
TTACCTTCTGGGTGGAATTGCCACAACATGGGCGTTCTTCTTAGCAAGAATTATTGCAGTAGGATAATGGCTAAGAGGAAGTGAGAAGGATTATTGGGTTT
>SRR492407.101902052
GTTACATTTTTCATTGTATTCTCGAAAAAAATATAAAGGACAAAAAGTCAATTGAAATTTTAATAAATTGGCTTCTTTATTTAAATTTTAATCTCGACGAT
>SRR492407.101902972
GGATTCCACGTGCCCCATGCTACTCGGGTCAGAGCATAAGCTAGTGATGCTTTCGGCTACTGGACTCTCGCCATCTAAGGGGCCGCACCCCAACCCCTTGC
>SRR492407.101907952
ATGTTGTGTTGAAGGGATATCTAGATGATCCGATCAATTGCGTAAAGCCCGCAGTAGCAACGGAACCGGGGAAAGTATACATAAGTATACAGAAGATCGGA
>SRR492407.101908272
CGGACTATGTAATGTACTTGAATCTGCCGGGTTACGGGGGGCTTTTTACCAGAGGTTTAGATTGTATCAATCTACCCTTGTGTGATTCCTGTTGAATCATA
>SRR492407.101916982
TATTGGATGGGTTACTTTTTATTGGCATTGGAAACACATCACATTATGGCAGGGGGAAGGTTTATAACTTTATTAAATATTCACCTTTTTTTTTGGGTGGG
>SRR492407.101921752
TCGTGCGGTGGTAAAAAAAAACATGCTTTTTTGGAGAGAGATACTATTTCACCTTCGTCAATCGAGTCACAGGTATCTAACATATTCATATCTAACGATTT
>SRR492407.101923272	Yes
GGATTAAATTGTTGTTGCTATCTGTTCCAATAACGAATCAACTGAATAACTAAATAAAATAGATAGAGATCGGAAGAGCACACGTCTGAACTCCAGTCACC
>SRR492407.101924802
TGAAGTTCCAACTACTTTAATTTAGTTACATTTTTCATTGTATTCTCGAAAAAAATATAAAGGACAAAAAGTCAATTGAAATTTTAATAAATTGGCTTCTT
>SRR492407.101924932
GGGGGAGTTCTTGTCTATCGTTGGCCTCTATGGTAGAATCAGTTAGGGGCCTGATAGGCGGTGGGTTACCCCGTGGCGGGTGGCAGGGGGTTGGGGGCGCT
>SRR492407.101927352
GAGTGGCGATGCCATACGCAAAAAGGAAGAGACTCATAGAATGGCAGAGGCAAATAGAGCTTTTGCACATTTTCGTTAATCCAGGAACAGGATAGATCGGA
>SRR492407.10193132
TTCATGTATGGTTACCTGATGCCATGGAGGGCCCTACTCCCATTTCGGCTCTTATACATGCTGCTACTATGGTAGCGGCGGGGGGGGTTTTTTTTTTTTCG
>SRR492407.101932322
TATTTGATTATAATTCAATTCGTGACGATCATAAGTGGAAAATTCATATTCTTCAGTCATTGACAAACAATTTGTTGGACAATACTCAACACAGATCGGAA
>SRR492407.101934112
ATACTATTGGATGGGTTACTTTTTATTGGCATTGGAAACACATCACATTATGGCAGGGGAAGGTGTTTCAGCGTAATTAAAATTTCCACTATTTTTTTGGG
>SRR492407.101934422
ACTGGTACACCAAAACAAAAGAGTTGGTTGTCGAGCCGTATGAGGTAGGAAACTCTCAAGTACGGTTCTCAGGGAGGGAATTGATCCGCCTAGATCGGAAG
>SRR492407.10193852
AGTAGTAAGCCCACCCCAAGATGAGTGCTCTCCTATTCCGACTTCCCCAGAGCCTCCGGTAGCACAGCCGAGACAGCAACGGGTTCTCCGCCCCTGCGGGG
>SRR492407.101938722
GCAGCATCCACTAATTCGGAACTTAATTTGAAAGCCATATTTCGACCCGGACGTTTTCGGGATGCCCCTAATAACCAACGAATGGCAAGTGCTTTTCCTTG
>SRR492407.101942622
ATTGTCTTTCATTCCAAGTCATAACTTGTATCCATGCGCTTCATATTCGCATGGAGTTCGCTCCCAGAAATATAGATACCCCTACCCCCTCACGCCAATCC
>SRR492407.101945822
CTACCAAGCTTGAGTACGGTAGGGGCAGAGGGAATTTCCGGTGGAGCGGTGAAATGCGTAGAGATCGGAAAGAACACCAACGGCGAAAGCACTATGCTGGG
>SRR492407.101946832
TCTATTTTGACTTGCTCCCTCGCTGTGATCGAATAAGAATGGATAAGAGGCTCGGGGGGTTGGCGGGGGGGGGGAGGGGGAGGCATATTTTTGGGGGGGGA
>SRR492407.101952192
ATCACTAACTAATCTAATAGAATAGAAAATCCTAATATAATAGAAAAGAAAAGAACTGTCTTTTCTGTATACTTATGTATACTTTCCCCGGTTCCGTCGCT
>SRR492407.101956292
ATCAGTGAGCTATTACACACTCTTTCAAGGGTGGCTGCTTCTAGGCAAACCTCCTGGCTGTCTCTGCACCCCTACCTCCTTTATCACTGAGCGGTCATTTA
>SRR492407.1019572
GGAAGGGGGCCTTCTTCGCCTTCCACCTAAGCTGCGCAGGAAAAGCCCAAAGCCAATCCCAGGGAACAGTGAAGCTTCATAGGGTCTTTCTGTCCAGGTGC
>SRR492407.101957022
ATGGTTACCTGATGCCATGGAGGGCCCTACTCCCATTTCGGCTCTTATACATGCTGCTACTATGGTAGGGGCGGGGGGGTTTTTTTTTTTTTTGGTTCTTT
>SRR492407.101960032
AGCTCATGGGTTTGGTCTTACTTCACCGTCGAGAAACGAAAGAAGGCTTCCACCTCCAAGTTTAACTCAGACGTAGCTCCCTTCTTTTTGGGTGTGGAGCT
>SRR492407.101962312
ATCCGGCTCTACCCAAACTTTTCTGGTTTACCCCAACATTTCCCACTTGTCCGACTGTTGCTGAGCAGTTTTTGGATATCAAACGGACCTCTCCAGAAGGT
>SRR492407.101965822
CCTGGGTGACCGATAGCGAAGTAGTACCGTGAGGGAAGGGTGAAAAGAACCCCCATCGGGGAGTGAAATAGAACATGAAACCGTAAGCTCCCAAGCAGTGG
>SRR492407.101970322
GATCCGGCTCTACCCAAACTTTTCTGGTTTACCCCAACATTTCCCACTTGTCCGACTGTTGCTGAGCAGTTTTTGGATATCAAACGGACCTCTCCAGAAGG
>SRR492407.101970382
GTTAGAAAGTCCATTTTATGAACTCTTTGAGAAATCAAAAAAAGCACGGATACGGATGCCTTTTTTTTCAACAAGGCAAGATGAAAAATTTAATATTGACG
>SRR492407.101970522
CGATTCGCATCATTATGTTCGATAAAAGGAATTAGAGAAGCTCCAATGGAAAAATATTGGAAAGGGAAAATGCTTCGAAGATGAACCTCTTCCCATGCGAT
>SRR492407.101975952
ACATATTCCCCCCTGGATGCAGGAATAGCGACATGGACTAAATGACCTGTCCAAGCCAATGAGCTTACCCCGAATAGTCCTGAAAAATGATGATTCAGACA
>SRR492407.101976672
ATTTCAACTAAAAAATGAAATAATTTTTCATTATCTTCATTAACGTAATCAGCCTCCAAATATTTGGAGGCTGATTACGTTAACTCGTCCCCGTGAGATCG
>SRR492407.101976852
AAGAGACAACCTGGCGAACTGAAACATCTTAGTAGCCAGAGGAAAAGAAAGCAAAAGCGATTCCCGTAGTAGCGGCGAGCGAAAAGGGAGGAGCCCAAACC
>SRR492407.10197702
ATATGAAATCGGGAATTTCATTTTTTTTATTTGTTTTTGTTTTTGAGTCAATTTTCTTAGTTTTTATTGGCTCAAGGCTCTTAATTTTTTTTGTTTTCGGA
>SRR492407.101977752
GCCCTATTCAGATATTCACGACCAAGAAGTACTGGATTCTCTTTAGGATAGGTCCTGAAAGGAGAAGGAAGGCTGGAATGCCGCCAGGCGTCTATTATTGA
>SRR492407.101977772
TTAGGATGCCTCAGCTGCATACATCACTGCACTTCCACTTGACACCTATCGTAATGATAAACGGCTCGTCTCCCCGCGGTCCTTTTTTTAATTCTTCACAA
>SRR492407.101980442
AAGAGAGATATAGGTGGATTCCTTTATATTAAGATATTTCACTTGTATCTTTATACATTACAATAACCATAATGGCTAAAAAAATAGAAAAAAAAATATTT
>SRR492407.101981862
GTGGAGGTTCGAGTCCTCTTCAAGGCATAATATTGAAATGGAATAAGTTCGGCAGCGGATCGCGGAAAAGTGGGGCTCTTCTCCATTCGATGAAAGGGGGG
>SRR492407.101984092
GGGAAATATTCAAGTTCCTAAAAGGGCCAGCTATATCAGAGTAATTATGCTGGAATTGAGTCGTATAGCTTCTCATCTGTTATGGCTCCCGCCCCTTTTTC
>SRR492407.101988982
CCTAGTACGAGAGGACCGGGAAGGACGCACCTCTGGTGTACCAGTTATCGTGCCCACGGTAAACGCTGGGTAGCCAAGTGCGGAGCGGATAACTGCCGCAA
>SRR492407.101992522
TTTACAACGGAATGGTATACAAAGTCAACAGATCGTAATGAATACAAAATAAGATTTATGGCTACACAAAATGATATACATATATCTGGAGTTAGGTCAAG
>SRR492407.101993012
GGACGTTACCAAAATTGGTACTATCGGGTCGGGAGAATTCAATAATAGACGCCTGGCGGCATTCCAGCCTTCCTTCTCCTTTCAGGACAGATCGGAAGAGC
>SRR492407.101995962
CTCTTCAATATTTTTTTATTTTTATTTTTATATTGAAGAGAATATTAAACTAAACCTTTAATCTAAAAAGATATAAAATTCTAAATTGTAGATTTGCATGA
>SRR492407.101997172
GTGGAGCGGTGAAATGCGTAGAGATCGGAAAGAACACCAACGGCGAAAGCACTCTGCTGGGCCGACACTGACACTGAGAGACGAAAGCTAGGGGAGCGAAT
>SRR492407.101997322
ACAGGAATATTCACCTGTTGTCCATCGACTACGCCTTTCGGCCTGATCTTAGGCCCTGACTCACCCTCCGTGGACGAACCTTGCGGAGGAACCCTTGGGGT
>SRR492407.101997972
ATTTAATCATGTAAAACATCACAATGTGATAAACCAATCAATAAAAAAAAATACTCTAATTACAATTAAAAATTCGTCGGGCCCCTTTGAACACCCACCCC
>SRR492407.101999262
CTTTTTTATTGGTATATCAAATTCATTTCTTCTTTTTTTCTCATATCAGATAACAAAGATATAATTAATAAATTTACTTTTTTTTTTTTCTTCTCTTAATT
>SRR492407.101999862
ACCTTTGGCAGCTAATCCTCTTGATAGTACGGTAGTCGCATCTAAATGTGCAAATGTGGTGGCAGGGGGGGGGGCCGGCCAATCATCTGCCGGGACAAAAA
>SRR492407.102000152
TCAGCTGCATACATCACTGCACTTCCACTTGACACCTATCGTAATGATAAACGGCTCCTCTCGCCGTGGCCTTCTCTTTGATTCTCCAAACTTCTGTACCC
>SRR492407.102003762
AAAAGCCTGTACGGTTATTCAAATTTATCTATTTTTTTTTGTTATCCCGTCTCATTCTGCGAAATAGAAAAACCTTTTCTATTATATCATCAGGGTAATGA
>SRR492407.102010032
AGCTGCTCACGGTTATTTTGGCCGATTGATTTTCCAATATGCTAGTTTCAACAATTCTCGTTCTTTACATTTCTTCTTAGCGGCTTTTTCCGTGGGTGGGT
>SRR492407.102010812
TCTGAGCAATTTTTCCCGTAGCTTTGACTGAACTTCCTTCTTGGATCATCAAACCGTCACCCATTAATACAACACCAACATTATTGGATTCTAAATTAAGG
>SRR492407.102011972
ACCAGAAACAATGGTATCTCCAATTATAGCCCCTCTGGGATGTAAAATATATCTCTTCTCACCATCCCCATAGTGTATGAGACAAATGTATGCATTTCGAT
>SRR492407.102022482
TTCAGTCCATCAGAATAGAAGTTAAAGAGGGTGTTTCTGCCCGGCGTGTCCTTTATATGGAAATTCGAGGTCAAGGGGCTATTCCTTTAATTCGTACTGAT
>SRR492407.102022592
CCGCATTTCGCTCAAAGGGTTGAAGGGAGATAGTGCATCAAGCTGTTCGCAAGGGCCAACTTGATCCTCTTCCCCAGGGATCAATCCCAGACGACGGAACC
>SRR492407.102022792
GCTATATCAGAGTAATTATGCTGGAATTGAGTCGTATAGCTTCTCATCTGTTATGGCTCCCGCCCTTTTTTGTATCTAATTTGTGTTTGGCTACCCCTTCT
>SRR492407.102022942
AAATGCATCGGTAGGGGAGCGTTCCGCCTTAGGGGGAAGCAACCGCGCGAGCGGCGGGGGGCGGAGCGGGAGCGGGAATGTTGGGGTTGTGGAACCCGAAA
>SRR492407.102030932
GCCGATTGATTTTCCAATATGCTAGTTTCAACAATTCTCGTTCTTTACATTTCTTCTTAGCGGCTTTGGTGGGCGTGCGGATTTTGGTTACTTGTTTTGAT
>SRR492407.102032212
ACTATATCTCTAGAGTCAATAATTTTATATGAGGAACTACTGAACTCAATCACTTGCTGCCGTTACTCTTCAGTTTTCTGTTGAGGTCTATCCTGTAGAGG
>SRR492407.10203312
CAAGATTGAGTGGGGATACAAAAAAAAAAGTATTATGAACTTTTTGATTGTAGCTAGTGAACGAGGAAAATTCATATAAAAAAATTACAACTATGAAAATT
>SRR492407.102035542
CGGGAATCTTATGATATGTTAGGAATCACTTATGATAGCCATCCACGACTGAAACGGATCCTAATGCCCGAGAGTTGGATAGGGTGGCCTTTACGTAAGGA
>SRR492407.102036232
AGTATTGACATGTAAAATGGGACTCTATCTTTATTCTCGTCCGATTAATTAAGTTCCATCAAGGATCTATCAGATTATGAAGTGAATAATTAGATCGGAAG
>SRR492407.102038082
TTCCGAGTCCAGGGCCTTTTATCCTTACTTCAGCTCGTTGCATACCTTGATCCACTACTGCTCGAATAGCATTTCCTGCTGCCGGTTGGGCCGCAAAGGGG
>SRR492407.102039262
TTGGCTCGACATTTTGTATTCTATTTTACAAGAGTCCTACACTTTTTTGTAATATAAAAAAGAGTACAGGATGGAGCTCGAGGGGGAAAGAAAAGTTTTTG
>SRR492407.102040202
TGTAATGTACTTGAATCTGCCGGGTTACGGGGGGCTTTTTACCAGAGGTTTAGATTGTATCAATCTACCCTTGTGTGATTCCTGTTGAATCATATACTGCG
>SRR492407.10204742
CTACTGAAGTATCATCTTGCTTTTACTAATGGTGACATAAGGATTTTCAGTCCTCTGCAACTAAGCTATGTCGACCATTACCGAAGGATCATCTTGCTTTT
>SRR492407.102048592
AAGGTTCGTCCACGGAGGGTGAGTCAGGGCCTAAGATCAGGCCGAAAGGCGTAGTCGATGGACAACAGGTGAATATTCCTGTACTACCCCTTGTTGGTCCC
>SRR492407.102049642
TAATTGCCCCATAGATCCTATATCTATCTATATGAAGAAGAAATCATGTAACGAAGGGGATTCTTATTTGTACAAATGGTACTTCGAGCTTGGAACGAGCA
>SRR492407.102050882
ACATTTTTTTTTGCTTTCCTGATCGGTACAATCTTATTTTGATGTCGAAAAAAAAAAAAATAACAATTTTTTGGATGTGATTAAAAATAAATGGATGGAGA
>SRR492407.102051152
AAGTTACTCTAGGGATAACAGGCTGATCTTCCCCAAGAGCTCACATCGACGGGAAGGTTTGGCACCTCGATGTCGGCTCTTCGCCACCTGGGGCTGCTGTA
>SRR492407.102056962
GTTTGAGTCAATGATTGCAAAACTTCCTTTTCTCGATCTTGATTTGCGTAGAATTTTAGGTCAGGAACTATGGTCCGATTTGAAAGATCGGAAGAGCACAC
>SRR492407.102060112
TACGACGAAACCTAGAAATCGATCACTGATCCAATTTGAGTACCTCTACAGGATAGACCTCAACAGAAAACTGAAGAGTAACGGCAGGAAGGGGCTTGGGT
>SRR492407.102064292
TTAGTCTTGGATTTATCTTTTTAACCGTCGGCATTCTTTCAGGAGCTGTCTGGGCTAATGAGACATGGGGTTCATATTGGAACTGGGAGATCGGAAGAGCA
>SRR492407.1020772
CTACTCAAGTCCAAACCGTTAGGACCCCTTAAAGGTTCTAACCAGGGAGCACGCAGATCCCAAAAGATCGGAAGAGCACACGTCTGAACTCCAGTCACCTT
>SRR492407.102079012
ACCTCTATCAACAAGCTAAAAAGTGAATTTTTTTGGGGGGGAAGTTCAAATTAGACTAGACAAACAAAAAAAAGTTCATTTTCCTCCCTTGCTTGCATATG
>SRR492407.102080762
GGCGGTCTTCGTAATAGAAGAGACATTTGTCGATAAGCTTGTGCTTGTTTGGAAAGATCATCATAAATTATTAAAGTGTGTTGTTCACGGTACATAAAATA
>SRR492407.102083112
TTGATGGGGATCAAATGGCTGTTCATGTGCCTTTATCTTTAGAGGCTCAAGCAGAGGCTCCGTTTCTTTTTTTTTTTCATATCAATATCTTTTCTCCCCCT
>SRR492407.102088542
GATATCTTGGCAGCATTCCGAGTAACTCCTCAACCTGGAGTTCCACCTGAAGAAGCAGGGGCTGCGGGAGGTGCTGAATCTTCTACCTGGACCTGGACACA
>SRR492407.10209192
TTGGCCCTTGCGAACAGCTTGATGCACTATCTCCCTTCAACCCTTTGAGCGAAATGCGGCAAAAGGAAGGAAAATCCATGGACCGACCCCATCGTCTCCAC
>SRR492407.102092022
GGTTTTGGCGCATTTCATGTAACAGGATTATATGGTCCTGGAATATGGGTATCCGACCCTTATGGACTAACCGGAAAGGTACAACCCGTAAACCCGGCGTG
>SRR492407.102094992
ATTTTATGTCTTTGTTATCTTCTTTTATTTTTTTGAGCTCCATCCATATTGATTTAGTCTAATCAACAAAGATTCTATCATTTTTGTATTTGCAATTCAAT
>SRR492407.102097452
TATGGAGGTACTTATGGCGGAACGGGCCAATCTGGTATTTCACAATAAAGTGATAGATGGAACTGCTATTAAACGACTTATAAGCCGCTTAATAGATCACT
>SRR492407.102099262
ATAGTTGCATTACTTATAGCTTCCTTCTTCGTAGACAAAGCTGATTCGGAATTGTCTTTCATTCCAAGTCATAACTTGTATCCATGCGCTTCATATTCGCA
>SRR492407.10210172
CTGGGATGTGATATGGTTCCGAAGGATGAACTGGATATGGACAGTTCCAATAAGATTTCATTCTTGAACAAAAATCCATTTTTTGATTTATTTAGATCGGA
>SRR492407.102102642
TGGCGAAAAAAAAATAAAATAGAAATTATCTTTCGGAGAGATGGCCGAGTGGTTGATGGCTCCGGTCTTGAAAACCGGTATAGTTCATAAAAATAACTATC
>SRR492407.10210482
GGATTGCAGGCTGCAACTCGCCTGCATGAAGCCGGAATCGCTAGTAATCGCCGGTCAGCCATACGGCGGGGAATTCGTTCCCGGGCCTTGGACACAACCCC
>SRR492407.102106372
TAGGATAATAAGCTCATGGGTTTGGTCTTACTTCACCGTCGAGAAACGAAAGAAGGCTTCCACCTCCAAGTTTAACTCAGACGTAGCTCCCTTCTTTTTGG
>SRR492407.102110462
TAAACCTTTTTCTTCATTAATTTTCATAGTTGTAATTTTTTTATATGAATTTTCCTCGTTCACTAGCTACAATCAAAAAGTTCATAATACTTTTTTTTTTG
>SRR492407.102110782
CTTGAGCCAATAAAAACTAAGAAAATTGACTCAAAAACAAAAACAAATAAAAAAAATGAAATTCCCGATTTCATATAAGAGCTCCATTGTAGAATTCGGGC
>SRR492407.102115942
AAATGCTGAATCTCGTCTGAATCATCATTTGTCAGGACTATTCGGGGTAAGCTCATTGGCTTTGGCAGGTCAATTTTTGCCTGTCGCCATTCCTTCCTCCA
>SRR492407.102118582
ATCTATTCGAAGCTGCCACCGGTATGAGAATGATGCATAATTTTTTTCGTATTGGAGGAATAGCGGCTGGTTTTCCTTTTGGTTTGGTAGGTTAAAACTTT
>SRR492407.102119082
AAAGAATGTATAATACTTGATACATAATACATATCCGAAAGGAAAGGTTAAATGAGTTCCGTTGAATCAAACAAGTAAAAAAAGGTCTATATGTATAGTAT
>SRR492407.102121222
TAAGCCGGAGGAAGGTGAGGATGACGTCAAGTCATCATGCCCCTTATGCCCTGGGCGACACACGTGCTACAATGGCCGGGACAAAGGGTCGCGATCCGGCG
>SRR492407.102121622
ACACGGGATTCCACGTGCCCCATGCTACTCGGGTCAGAGCATAAGCTAGTGATGCTTTCGGCTAACGGACTGTCCCCATCCTCGGTGCGGGACTTCCCCCC
>SRR492407.10212562
GCAATTAAGCTATGCCGACCATTACTGAGGTATCATCTACTGAAGTATCATCTTGCTTTTACTAATGGTGACATAAGGATTTTCAGTCCTCTGCAACTAAG
>SRR492407.102126052
TCCGTCAGGCTTTCGCCCATTGCGGAAAATTCCCCACTGCTGCCTCCCGTAGGAGTCTGGGCCGTGTCTCAGTCCCAGTGTGGCTGATCATCCTCTCCGAC
>SRR492407.102128382
TCGGGGGGGAGTTCTTGTCTATCGTTGGCCTCTATGGTAGAATCAGTCAGGGGCCTGATAGGCGGGGGGTTTCCCTGTGGGGGGAGGTCGGGGGTTGGGGC
>SRR492407.102132172
TGTTATTATCAATTTTTTCATGAGTCCTAATTATTGTTTTAACTAGTCCATTTGGATTAGGTTGGAGTGTGTAAAAGATCGGAAGAGCACACGTCTGAACT
>SRR492407.102133002
AACTTGCAAAATGGATCCGTTTATCATAAAGAGATTCGTTGTTCCTGACCCTGCTTCACCTTAATTGTTATTTGAACAAGTCAAAGTTCTGTCTTGGTCTG
>SRR492407.102133712
TACGCGCATCCGGAATACCATGGGATCTTCGTAAAATTGATCGTTATGAGTCTTACGATGAATTTGAATGGGAAATTCAATGGCAAAAACAAGATCGGAAG
>SRR492407.102136162
ACTCGCCTGCATGAAGCCGGAATCGCTAGTAATCGCCGGTCAGCCATACGGCGGTGAATTCGTTCCCGGGCCTTGTACACACCGCCCGTCACACTCTGGGA
>SRR492407.102136362
ATTAGCTCTCCCTGAAAAGGAGGGGATCCAGCCGCACCTTCCAGTACGGCTACCTTGTTACGACTTCCCTCCCGTCACTAACCCCGCCCTCGGCACCCCCC
>SRR492407.102141652
TCTGAGCATTCCGAGACTTTCATGAGTATATATCCAAAGTATCTTAGGTCCTTTTCAAAACTATTAATTTAAATCTCTCTCCGGCTATCCAGATCGGAAGA
>SRR492407.1021432
ATTTTTAATAATTTTTTTTTTTAGCCCCCATATATCAAACGAAAAAAAAAAAAGTTTTTTTTTTTTTTTAAAAAAAAGGGGGGAAATGACTTTTGTTTGAA
>SRR492407.102143842
ATAAGCTCACACTAACCCGTCAATTTGGGATCCAATTCGGGATTTTCCTTGAGGGATATTGGTAAGGAATTGGAATGTAATAATATCGATTCATAATGGAT
>SRR492407.10214422
ACTTAGTCAACTTTAGTCACATAACTGGGAATGAATAAATAAGATCGGAAAGCAATAAATGAAGGGGGGGGGATACAATTCTATTTCTATTGTATCTAATG
>SRR492407.10214662
CAGTAGAGTTTAACCACCAAGTTCGGGATGGATTGGTGTTGTTCCTCTACGCCTAGGACACCAGAATATCGAACCATGAACGAAGAAAGGCATGCGAGAAA
>SRR492407.102147632
AGGGTGAGTCAGGGCCTAAGATCAGGCCGAAAGGCGTAGTCGATGGACAACAGGTGAATATTCCTGTACTACCCCTTGTTGGTCCCGAGGGACGGAGGAGG
>SRR492407.102154192
CTACTTCTGCAGCTATTGGATTGCATTTTTACCCAATCTGGGAAGCTGCATCCGTTGATGAATGGCTATACAATGGCGGGCCCTTTGAAATAATTTATTTA
>SRR492407.10215482
AATTAGGAAAATCTAATTTTATTTAAAATTGCTAAGGATTTTGAAGAAGTTTTTATTTTTCGAAAAAGCATTTTTTTATCAATTTTTTTTCATATAAATGA
>SRR492407.102156562
CTACTTCTGCAGCTATTGGATTGCATTTTTACCCAATCTGGGAAGCTGCATCCGTTGATGAATGGCTATACAATGGCGGGCCCTATTAAATTATTTTTTTA
>SRR492407.102157412
GCCCGGGAACGAATTCACCGCCGTATGGCTGACCGGCGATTACTAGCGATTCCGGCTTCATGCAGGGGGGGTGGAGCCCGCCATCCCGACCGGGGGAGGGG
>SRR492407.102165102
GAAATGCGTTGAGGCGCAGCAGTTGACTGGACATCTAGGGGTAAAGCACTGTTTCGGTGCGGGCCGCGAGAGCGGCACCAAATCGAGGCAAGACCGGAAGG
>SRR492407.102166192
ATAAGCTCATGGGTTTGGTCTTACTTCACCGTCGAGAAACGAAAGAAGGCTTCCACCTCCAAGTTTAACTCAGACGTAGCTCCCTTCTTTTTTGGTGTGGA
>SRR492407.102166442
AATGCAGACTTTGATGGGGATCAAATGGCTGTTCATGTGCCTTTATCTTTAGAGGCTCAAGCAGAGGCTCCCTTTTTTTTTTTTTTTTTTTTTAATTTCTT
>SRR492407.10216662
CGTCAGGCTTTCGCCCATTGCGGAAAATTCCCCACTGCTGCCTCCCGTAGGAGTCTGGGCCGTGTCTCAGTCCCAGTGTGGCTGATCATCCCCTCGGACCA
>SRR492407.102167742
TATTTATGATTAAGGAATTGGAAATCGCGTATACATGCGTATTCTTATCATACTGAAATGATTTCCGTTAGTAGTATTAAACCAATAGCGATTCATACAAG
>SRR492407.102170992
AAGCTCGATTCGCATCATTATGTTCGATAAAAGGAATTAGAGAAGCTCCAATGGAAAAATATTGGAAAGGGAAAATGCTTCGAAGATGAACCTCTTCCCAT
>SRR492407.102174802
CGCAATATAAATATATCTATATTGATATTTAAATATATTGATATTTATCTATTATTTCCATTTCTATATATTATTTCTATATATTATATATAATATCTATT
>SRR492407.102178242
TGACAACACGAAAAAACCATTGTTCAACTCTTTGACAACATGAAAAAACCTAAAATTCTGCCCTTCTATCCAAAGGATGGGGGGGAAGAGGCCTTTGGTGT
>SRR492407.102180042
GGTCCATGGATTTTCCTTCCTTTTGCCGCATTTCGCTCAAAGGGTTGAAGGGAGATAGTGCATCAAGCTGTTCGCAAGGGCCAACTTGATCCTCTTCCCCA
>SRR492407.102181922
TTTCATTCTTGAACAAAAATCCATTTTTTGATTTATTTCATCTATTCCATGAACGGAAGAGGGGGGGATACACGTTACGCCACGAGTCAGAAGAGAGATTT
>SRR492407.102181952
ATAGAGAAAGATAACTAGTTCCAAGAATTAAAAAAATTCAATTGAAAATTTGTGAATTATCAATCATTATAGGTGGTATAGATCGGAAGAGCACACGTCTG
>SRR492407.102182852
CAATGCTAAATGCAGAGGCGCATAATAGATCGATATGAACATCATGAGCTGTCCCGCAATAAAACCTGTTGTTGCTGATACTTTATTCTCGGTTCATTCTT
>SRR492407.102183422
CTTAGGCCCTGACTCACCCTCCGTGGACGAACCTTGCGGAGGAACCCTTGGGTTTTCGGGGCATTGGATTCTCACCAATGTTTGCGTTACTCAAGCCGACA
>SRR492407.102191332
GTTAAGGGCGAGGTTCAAACGAGGAAAGGCTTACGGTGGATACCTAGGCACCCAGGGCCGGGGAAGGGGGAGGAAAGCGACGAAAGGTTTCGGGGGGGTGA
>SRR492407.102192252
TAACCCCTATGCCACATAATGGTTGTAGACCCCCTAAAAAAAGACGTGTATAGAACTAAAAAAAGGCTAAAAGGGTTTCAAGAGAAATAAACGATTCAACG
>SRR492407.102192352
TCTGTATATGAGCCTCTTCAAACAGGACTTATTGCTATTGATTCCATGATCCCTATAGGACGCGGCCAGCGAGAATTAATTATAGATCGGAAGAGCACACG
>SRR492407.102196532
AAAAAAAAGTCGTCAAAACAAAACGAGAGTATATAGTTTCGAAAAAACGAGTTATGCTTTTCGACGATTCTTTTCTTTTTTTTTTTTTTAAAGAACAAAAA
>SRR492407.102200372
AAGAAATATTATTTCTTAAACTTCGAATTGATTCACAACATTTTGATTTTGTTTATAAAAAAATAGAAATCGAGATTCAGGTCGTCATTTTAGATCGGAAG
>SRR492407.102201182
ACAGTGAAGCTTCATAGGGTCTTTCTGTCCAGGTGCAGGTAGTCCGCATCTTCACAGACATGTCTATTTCACCGAGCCTCTCTCCGAGACAGTGCCCAGAT
>SRR492407.102201732
AAAAGCAAGATGATCCTTCGGTAATGGTCGACATAGCTTAGTTGCAGAGGACTGAAAATCCTTATGTCACCATTAGTAAAAGCAAGATGATACTTCAGTAG
>SRR492407.102203322
TATTGCTACTGCACTCTTCATTCTCGTTCCTACTGCTTTTTTGCTTATAATTTACGTAAAAACCGTTAGTCAAAATGATTAATTTGAATAAAATTTTACTA
>SRR492407.102211032
GATTTTGCACATTCTTTTTTTTTAACAATTGGAAAGTAAAAAAAAGCGAAAAGCGTCCATTGTCTAATGGATAGGACAAAAGTCTTCTAAACCTTTGGTAT
>SRR492407.102211052
TTGGGTTAGTACCATTATTAACAATGAATAATACAAAAAGAGCTTCTTTTTTTTGCAATAAAACATATAAAATTAGTAATAATGTAAGAAATCAAATTTTT
>SRR492407.102217242
AAGGGGCTCGTACATGTTCGGCAGTACCTCCTGTAAATACTCCGCCGGTATGAAAAGTTCTTAATGTTAGTTGAGTCCCCGGTTCGCCGATCGATTGACCC
>SRR492407.102222622
TATTAAGGCACATTCTTTTAATATAATATATTCGTAATTACTTTCTTGAAATTGATAGGTTGAAAATACACTTTAGAAAAAAAAAGAGAAAACAGCCTAAT
>SRR492407.102225762
AGATATAAAGTTCAAAGTAGGTTAAAGTTAAAAAACTGGTACACCAAAACAAAAGAGTTGGTTGTCGAGCCGTATGAGGTAGGAAACTCTCAAGTAAGGTT
>SRR492407.102231812
GGGTAGCCAAGTGCGGAGCGGATAACTGCTGAAAGCATCTAAGTAGTAAGCCCACCCCAAGATGAGTGCTCTCCTATTCCGACTTCCCCAGAGCCTCCGGT
>SRR492407.102232172
CTACAGTGATGAATATAAGCGCAATTGAAATTCCTGGGGAGTTATACATTTGTGTATTGATAAGACCATTCACTATTTCTTGAAGCTCAATCTCTCCCCCG
>SRR492407.102232992
TCAAAACAATGATATATAAAGCAACGGAACCATCATAGTATTTTTTTAACTCCTACAAAAAAAAGAAGGATGGTAATTGGATGATTTAAGGAAAGGTCAAA
>SRR492407.102233152
TGCGACTGCTGTTTTCTTGATCTATCCAATTGGTCAGGGAAGTTTTTCTGATGGATGCCTCCTGGGATCTCTTGGACTTTCCACTTTATGATTTGATTTCA
>SRR492407.102240112
GAATTGAATAAAAAAACTCGGGAGAGGGTAGGCTCATTGCATGAAAAAGATGGGAAGGGAAGTCTCATAAATAAAGATCGGAAGAGCACACGTCTGAACTC
>SRR492407.102241072
CATAGGGTCTTTCTGTCCAGGTGCAGGTAGTCCGCATCTTCACAGACATGTCTATTTCACCGAGCCTCTCTCCGAGACAGTGCCCAGATCGTTAAGCCTTT
>SRR492407.102244292
ACAAGGTTCAAGTCTACCGGTCTGTTAGGATGCCTCAGCTGCATACATCACTGCACTTCCACTTGACACCTATCGTAATGATAAACGGCTCCTCCCCCCCG
>SRR492407.102244602
TGAATAAAAAAAAATATATATATATTATTATATTATAATAATATTATTATGAATAATTTCTTCATCATAAAAAAATAAAAATTTAAAGGCCATAAAAAAAA
>SRR492407.102247892
GAGGAGGGGGGTGCCGAAGGCAGGGCTAGTGACTGGAGTGAAGTCGTAACAAGGTAGCCGTACTGGAAGGGGGGGGTGGGGGACCCCCCTTTTTGGGGGGG
>SRR492407.102258852
TTAGGTGGACAACCCGGCAAATAGACATCTACAGGAATTAGCTTATCAACTCCTCGAACAGTACTATAAGAATCGGTACTGAACATCCCCCCTGTAATTGT
>SRR492407.102264072
TTGCTATCCTATCATCTTGCCTAGCAGGCAAAGATTTCACTCCGCGAAAAAGATGATTCATTCGGATCAACATGAAAGTCCAACTACATTGCCAGAATTTA
>SRR492407.102264462
ATCAAGTATCATCTACTGAAGTATCATGCTCGTTTTCCTAATGGTGACACGAGGATTTCGAGTCCTCTGCAAAAAAGCTATGTCTACCTTTACTGAAGGAT
>SRR492407.102266442
CTTAGGAGCCGTGCGAGATGAAAGTCTCATGCACGGTTTTGAATGAGAGAAAGAAGTGAGGAATCCTCTTTTCGACTCTGACTCTCCCACTCCAGTCGTTG
>SRR492407.102271662
GCTTGCATATGTATAGATAATTCAAATATAGATAGATGCAGATCTATAGAGAGTCTTCCATCTTTTTGCATTTCCCGAAAATTCCCTGTTGTTAGATCAGA
>SRR492407.102276592
TGTCACCATTAGTAAAAGCAAGATGATCCTTCGGTAATGGTCGACATAGCTTAGTTGCAGAGGACTGAAAATCCTTATGTCACCATTAGTAAAAGCAAGAT
>SRR492407.102277642
AACTTTTCCGGTAGTTTTGGTAGACGGAGACGGAATTGTTAGAGCTGACGTCCCGTTTAGAAGGGCAGAATCAAAATATAGTGAGATCGGAAGAGCACACG
>SRR492407.102279762
TCTTCCTTTTTGCGTATGGCATCGCCACTCCCTTTGGCAGCATCCACTAATTCGGAACTTAATTTGAAAGCCATATTTCGACCCGGACGTTTTCGGGGTGC
>SRR492407.102285152
CTGATAAGTGAGATTTCGAGTAAGTCTTTACATAATCTTCTTCTGTCCGAAGAAATGATTCATCGAAATAATGAGTCATCATTGATATCGACACATCTGAG
>SRR492407.102287472
ACAAGCAGTCTGATGCAACATTGCTTTTTTTCTTCTAGTTTCTGTTTGTTATTTTATTTAATAGGTAGGGTACTGTAGGAATCTTTATTTAAATCGCTGCC
>SRR492407.102289262
ATCTTCCCCTTCTTCCGAAAAAAGAGAAGGAAAAGGAGCTTCTTCGGTGGATACCTCTTGGTCCTGTTTAGTCCCACCCGTTTCTGAGGTTCCTTTCAGCT
>SRR492407.102291702
AATATTAACAAGTTTTGATTCAATCGTCGAGATTAAAATTTAAATAAAGAAGCCAATTTATTAAAATTTCAATTGACTTTTTGTCCTTTATATTTTTTTCG
>SRR492407.102292732
AGCGTTCATCCTGAGCCAGGATCGAACTCTCCATGAGATTCATAGTTGCATTACTTATAGCTTCCTTCTTCGTAGACAAAGCTGATTCGGAATTGTCTTTC
>SRR492407.102292782
TATTTGGCAGTTTTCTGGATGTTAAATACTATTGGATGGGTTACTTTTTATTGGCATTGGAAACACATCACATTATGGCAGGGGGGAGGTTTTCTGTTTTA
>SRR492407.102300862
CTTGACTGGAGTGGACACCAAAGGCCTCTGCCCCCCCATCCTTTGGATAGAAGGGCAGAATTTTAGGTTTTTTCATGTTGTCAAAGAGTTGAACAATGGTT
>SRR492407.102304482
CTATTGATATTGCAAGACCCAAAAGATTCTTCCGATGTATCATTTCTGGGTCCAATGGAATTCATAGGTATAGGAAGAAGCCCTTTCAAATAGAGAGATCG
>SRR492407.102305082
GTGATATTTCGGCTTGGGACGCATTTTATTTGGCAGTTTTCTGGATGTTAAATACTATTGGATGGGGTTCTTTTTTTTGGCATTTGGAAAACCACCCAATA
>SRR492407.10230962
CGGATTTTTTTAGGAAAATATCGAGAGAGAATTGGATTTGGTTAGACAATGTGTGGTTGGTAAACAAGGATAGATTTTTTAGCAAGGTAAGAAACCTCTCG
>SRR492407.102313192
TTCCTAAAAGGGCCAGCTATATCAGAGTAATTATGCTGGAATTGAGTCGTATAGCTTCTCATCTGTTATGGCTCCGCCCCCTTTTTGTGGGCGATTGTGGG
>SRR492407.102315822
CAAAACTTCTGTCACTCCATCCCCGCAGGGGCGGAGAACCCGTTGCTGTCTCGGCTGTGCTACCGGAGGGCCTGGGGGAGGGGGGAAAGGGGAGACAGCCC
>SRR492407.102317942
TAACTGTCCTAGCTCTACCGTATCTTTTGTTTCATTTCTTCTGGAACAATCACAAACACTTTTTGATTATGGGTCTACTTACAAGAATGAAAAGCGTTAAC
>SRR492407.10232322
AGCGTCGTGCTGCTAGGCGAAGCGGTGGAGTGCCGCACCCTAGATGGCGAGAGTCCAGTAGCCGAAAGCATCACTAGCTTATGCTCTGCCCCGCGATCAAC
>SRR492407.102330152
CTGTGGGATGTCAAAATGCATCGGTAGGGGAGCGTTCCGCCTTAGGGGGAAGCAACCGCGCGAGCGGCGGGGGGCGCAACGGACGCGAGAAAGTCGGCCGC
>SRR492407.102342742
ATTGAGAGGACCTTTCCCTAGTACGAGAGGACCGGGAAGGACGCACCTCTGGTGTACCAGTTATCGTGCCCACGGTAAACGCTGGGTAGCCAAGTGCGGAG
>SRR492407.102354532
TGAAAAAAAAATGATAAAGAGCATTTAGAGTTTTGTCTTTGGGTTGAAGTTCCAACTACTTTAATTTAGTTACATTTTTCATTGTATTCTCGAAAAAAATA
>SRR492407.102356582
ACGAGGATTTCGAGTCCTCTGCAAAAAAGCTATGTCTACCTTTACTGAAGGATCATTATCATGTGACACAGGGATTTTCAGTCCCCCGCAATTAAGCTATG
>SRR492407.1023572
CAAATTTTTTTACGTTTACACATGCATAAGAGTTTTTTTTATTTATGTTTGTAGGAATCTATGTGTTATACAACATTCTACCAAATGGGTCTTATCGAATG
>SRR492407.102357502
AAAATGCATCGGTAGGGGAGCGTTCCGCCTTAGGGGGAAGCAACCGCGCGAGCGGCGGGGGGCGGAGGGGGAGGGGGGAAGGCGGGGTTGGGGAACGCGAA
>SRR492407.10235912
GGGACGGAGGAGGCTAGGTTAGCCGAAAGATGGTTATCGGTTCAAGGACGCAAGGTGTCCCTGTTTTTTCAGGGTAAGAAGGGGTAGAGAAAATGCCCCGA
>SRR492407.102360072
CCGAATTTAAGAATTCAGAATGTAAGAATGAACGGGTTCGCTTTGACCGTTAAGAGTCGGTAACCCCTTCCCTGGGTCTTTGTTTCTATTGCATTCTATCT
>SRR492407.102363052
CCGAATTTATTATCTTCATGCATAAGGATACTAGATTACCTAGTATAAAAGATTGAAAAACCATCACAAACCTCCCTTTTTTCTTTTCTATTTCAATTTCT
>SRR492407.102363432
TACATGGATTATATCTGTTTGCACAAATACCTCGACGAGTGCCGCTCGTTAATACATAGAGTCCAATAAGCATATCTTGAGTCGGTACCGAAATGGGGTCT
>SRR492407.1023682
CGGTGTGTACAAGGCCCGGGAACGAATTCACCGCCGTATGGCTGACCGGCGATTACTAGCGATTCCGGCTTCATGCAGGCGGGGTGGCGGCCGCAAACCCA
>SRR492407.102368592
TTTCTTTCTAAGAGGTGGAATAGAATAACCCGGTTGAAGCGTAATGATCATACGTCTGTAATGCATTGTATGTCCCAGAATAGAGATCGGAAGAGCACACG
>SRR492407.102369902
GTAATTTCATAGAGTCATTCGGTCTGAATGCTACATGAAGAACATAAGCCAGATGACGGAACGGGAAGACCTAGGATGTAGAAGATCATAACATAAGTTAT
>SRR492407.102370352
GTACGGTAGGGGCAGAGGGAATTTCCGGTGGAGCGGTGAAATGCGTAGAGATCGGAAAGAACACCAACGGCGAAAGCACTCTGCTGGGCCGACACTGACAC
>SRR492407.102372272
GATGAGAATTTTACTACACGAGAAATTGAGCAAAAAGCTGCTGAATTGGCTTACTTCTTGCGTGTACCAATTGAAGTATTTTGAAATTAGGCAGTAGGAAG
>SRR492407.102372612
CGCTTTTCTAAGTTCAACGATATTGAATCAATCGAGCGGACTTCTAAAACTTGTTCTACTTTTGGAAGACCTTGGGTTATATCAGATCGGAAGAGCACACG
>SRR492407.102373932
GTGGATTGTCCAACACTAGCACTTCCGCGTAATAATTCTACAAGAGGAGATCCTATTACCGGGATAGCGTCAGGGACACCCGCTATAACTTTGACCGCCCC
>SRR492407.102378432
ACGCGTTAGCTACAGCACTGCACGGGTCGATACGCACAGCGCCTAGTATCCATCGTTTACGGCTAAGAACAATGGGGGATCTAAATCCATTCGCTCCCCCC
>SRR492407.102379412
GGTTACTGGTGTGGTTCTGGGTGTATTGACCGCATCTTTTGGTGTAACAGGTTATTCTTTACCTTGGGATCAAATTGGTTATTGGGCGGTCAAAATTGTAA
>SRR492407.102383762
GTTTACCCCAACATTTCCCACTTGTCCGACTGTTGCTGAGCAGTTTTTGGATATCAAACGGACCTCTCCAGAAGGTAATTTTAATGTGGCCGATTTCCCCC
>SRR492407.102385252
CAAGAAGCATTAGCTCTCCCTGAAAAGGAGGTGATCCAGCCGCACCTTCCAGTACGGCTAACTTGTTACGACCTCACTCCAGTCACCAACCCTTCCTTTCG
>SRR492407.102391622
TCCCTTACCTTGTGCCTTTTTATTTTTAATGGAAAAGGGGAGTTGTCCGAACTCTTGTTTTTAGTAATTTTTTTTTTTTTTTTACTTAATTTAGGTTTATT
>SRR492407.102392982
TAACAAATTGGTCCACTACCGAAAAAAGACTTCATAAGTTTAGGGACTTGAGAACTGAACAAAAGACAGAGGGATTCAACCGTCTTCCGAAAAGGGATGCA
>SRR492407.102395522
ATTTGAATAAAATTTTACTATCAATAAAAAAAAAAAGATTTCAATTTCTCGTCTTAAATGAAAGGAACGCATTAGACTCAGTAGTAGTATCCTAAGGGGTC
>SRR492407.102396112
TTCGCACTTTATACGGGTATGAAATGAAAATAATGGAAAAAGTTGGATTCAATTGTCAACTACTCCTATCGGAAATAGGATTGACTACGGATTCGAGCCAT
>SRR492407.102399012
ACTAGTCGGATGGAGTAGATAATCTCCTTGTTAAAATGAAAAAAAAAAGGTAAAAAACCCCTCCCCAAACCGAGATCGGAAGAGCACACGTCTGAACTCCA
>SRR492407.102402142
TGCCTCTTTTTCTCCGGAAGTTGTCGGAATGACTCGTAATAAGATATCGGCTAAAAATTTAAAAGGTTTTTTAAAAAAAATTTCCTTTTTACGCCAGCTTG
>SRR492407.102407242
ACGAAAGAACCCTTTTTTTGCAATTCCTATGATGCAATTGGAGCTTATCGACAGAAAAAAATCAATTTAGATAGTCCTTTGTGGCTTTTTTTGTCAATTAA
>SRR492407.102408202
CTAAATACCCAAGAAGCATTAGCTCTCCCTGAAAAGGAGGTGATCCAGCCGCACCTTCCAGTACGGCTAACTTGTTACCACTTTTCTCCCACCACTACCCC
>SRR492407.102408462
ATGGATTTTCCTTCCTTTTGCCGCATTTCGCTCAAAGGGTTGAAGGGAGATAGTGCATCAAGCTGTTCGCAAGGGCCAACTTGATCCTCTTCCCCAGGGAT
>SRR492407.102410422
AACTTTGTATCGCGCACATAACTTAGTCAACTTTAGTCACATAACTGGGAATGAATAAATAAGATCGGAAAGCAATAAATGAAGGGGGGGGGATACAATTC
>SRR492407.10241472
TCATGGAGAGTTCGATCCTGGCTCAGGATGAACGCTGGCGGCATGCTTAACACATGCAAGTCGGACGGGAAGAGGTGTTTCCAGTGGAGGGCGGGGGGGGG
>SRR492407.102416292
ATAGATACCCTTTTTGACCGGAAAATTTGGAAGTAGATAGAAGGTTTTTTTTAATGAGTCCGCTTTTATGTTAGTTCGTACTATACAATTCCTTTGTTTGT
>SRR492407.102418042
AGTCCGCTTTGAAATCGTCCGCCCTGCGCCCCGCAGTATATGATTCAACAGGAATCACACAAGGGGAGATTGATACAATCTAAACCTCTGGTAAAAAGCCC
>SRR492407.102418922
TTCGGTAATGGTCGACATAGCTTAGTTGCAGAGGACTGAAAATCCTTATGTCACCATTAGTAAAAGCAAGATGATACTTCAGTAGATGATACCTCAGTAAT
>SRR492407.102422792
AATATATCAAAAAAACGAGCATAAAAGAAGAGATGAATATTCAATTGAAAAAAAAAAGAAAGAAATTCTTTCGTTTTTTCTTCCTACTGCCTAATTTCAAA
>SRR492407.102433052
TGCTTCGAAGATGAACCTCTTCCCATGCGATAGTCAAAAATTCTTGGCGGTATCGAGCTGGAACAGCCTGTTCTTCTTGAATGCCCCGATTAAGAGCCAAA
>SRR492407.102434812
AATTGATAGGTTGAAAATACACTTTAGAAAAAAAAAGAGAAAACAGCCTAATACTAATAATTGTATCTACATCAATTCATATCCATTAGATTCTAATTTCA
>SRR492407.102445302
AAGGTTATATACATTCTCATTATGAGAAGGGGTCATTCGAGCGTATCTAAATAGATACTATGTTTACATAGGGATCCCTACGTCGTTCAATTCCATTTAGG
>SRR492407.102454832
TCGCGAGGTTTTTTAAAACCACCGGTGAGGTATACACGAAATACGTGCAGGATCATCATTAGGACCATCATACTTGCCGACCATCGATGAACTGATCGGAT
>SRR492407.102456402
TGTCAAACCTAAATACCCAAGAAGCATTAGCTCTCCCTGAAAAGGAGGTGATCCAGCCGCACCTTCCAGTACGGCTAACCTGTTACGACCTTACTCCCCGC
>SRR492407.102459572
AGAGGACTCGAACCTCCACGCTCTTTAGCACGGGATTTTGAGTCTCGCGTGTCTACCATTTCACCACCAAGGCATCTTACAAGTGAATCGTATTCAATAAA
>SRR492407.102461482
TTCAGTGGCATGTTTCGGTCCTTTTCCCCATTACTTAGAAAAAGTGAGCCACCGGTTCAGGTACAAGATACTATCATTACCGCCTGGACAATTAGACACCC
>SRR492407.102462162
TATACAACAGATATTACTGTCAAGAGTGATTTTATTAATATTTTAATATTAAATATTTGGATTTATAAAAAGTCAAAGATTCAAAACTTGAAAAAGAAGTA
>SRR492407.102462652
TGGCGGACGGGTGAGTAACGCGTAAGAACCTGCCCTTGGGAGGGGAACAACAGCTGGAAACGGCTGCTAATACCACCAAGGCTGAGGGGCAAAAGGGGGGA
>SRR492407.102468902
ATGGGTTTGGTCTTACTTCACCGTCGAGAAACGAAAGAAGGCTTCCACCTCCAAGTTTAACTCAGACGTAGCTCCCTTCTTTTTGGGTGTGAAGCTGTGTC
>SRR492407.102474972
AATGGAAAAGGGGAGTTGTCCGAACTCTTGTTTTTAGTAATTTTTTTTTTTTTTTACTTAAGTTAGGTTTTTTAAGTCTTTCGGGGGAAATTTTCTATCAA
>SRR492407.102482432
AATGGGGTAAACCCTTTAATTTGATTAAAAAGAGAATTCCAAGTTGTTGAATTATATTTATATAAAGAATTTAATTAAAAACTTGTATTGTATTTATATAA
>SRR492407.10248872
AAAGTTGTAAGCTGTGTTCGGGGGGGAGTTCTTGTCTATCGTTGGCCTCTATGGTAGAATCAGTCAGGGGCCTGATAGGCGGGGGGTTACCCCTTTGCGGG
>SRR492407.102489892
TTCCCATCGCTTCTTGATTAATCATTAGGCCCGAATTCTACAATGGAGCTCTTATATGAAATCGGGAATTTCATTTTTTTTATTTGTTTTTGTTTTTGAGT
>SRR492407.102491942
TTTCCCACTTGTCCGACTGTTGCTGAGCAGTTTTTGGATATCAAACGGACCTCTCCAGAAGGTAATTTTAATGTGGCCGGTTTCCCCTCTTTTGCAATCAG
>SRR492407.102493552
CTTGGCCCGTAGGTCCTGACACAAGGTTAGAATTCTAGCTCTTCCAGAGTGGTATCTCACTGATGGCTCCCGCCCCCCCCGCCAGGGGGCGTCTCTCGCCT
>SRR492407.102494752
TAAAAGCAAGATGATCCTTCGGTAATGGTCGACATAGCTTAGTTGCAGAGGACTGAAAATCCTTATGTCACCATTAGTAAAAGCAAGATGATACTTCAGTA
>SRR492407.102499542
TTCTCTTCAATATAAAAATAAAAATAAAAAAATATTGAAGAGAATCTTGAAGAGAAGTAATTCAGAATTAGCCGGTTAGAACTAATCTAAACCAGCCCATT
>SRR492407.102500522
TTTCTATTTTGACTTGCTCCCTCGCTGTGATCGAATAAGAATGGATAAGAGGCTCGGGGGGTTGACGTGGGGGGGGAGGGGGAGCTATTATTCTGGGGGCG
>SRR492407.102501742
AGATTTATTATTCTTTTTGTCTTAATATCTTATAATAGTTAATAGTCATTAATAAAGAAAAATTTTTCTTCCATTACAAATTTCTACAAAATTGATTAGAA
>SRR492407.102504602
GCTATATCAGAGTAATTATGCTGGAATTGAGTCGTATAGCTTCTCATCTGTTATGGCTCCCCCCCCTTTTTGTCGGGGTTTGTGGGCAGGACCCCCCTTTT
>SRR492407.102504752
TAAACCCAATGAATGTGAGTTTTTCTATTTTGACTTGCTCCCTCGCTGTGATCGAATAAGAATGGATAAGAGGCTCCTGGGGTTTGAGGGGGGGGGGGGGG
>SRR492407.102504862
CGATCGTATTTCACCCGAGATGAAAAAAAAGATAGGAAATCTTTCTTTTCAGAATTATCGTCCCAAAGATCGGAAGAGCACACGTCTGAACTCCAGTCACC
>SRR492407.102509682
AGACCTAAGTCATATATTAAAATGATACTGATACTTCAGTAGATTATACTTCGGTAATGGTAGACATCGCTTAATTGCGGGGGACTGAAAAGCCTTGTGTC
>SRR492407.102513352
TTGAGCCAAAAGATCCCGATTCAAGATAAATTCATGAGGAAGCGGTATTTCTTTAGGATCTACTCCAGCGTTTAAGATCGGAAGAGCACACGTCTGAACTC
>SRR492407.102516602
GCGGGGATTCGACTTCCCCTGGGGGTAGGGTACTACGAAAGGAAGTTGATCATGGATTATCCATAAAGTTAGAATAGATTCTTCCTGGGTCGATGCCCGAG
>SRR492407.102518492
AGATAAATCTGTTCCGAAAACAAAAAAAATTAAGAGCCTTGAGCCAATAAAAACTAAGAAAATTGACTCAAAAACAAAAACAAATAAAAAAAATGAAATTC
>SRR492407.102522332
CCTTGTTGGTCCCGAGGGACGGAGGAGGCTAGGTTAGCCGAAAGATGGTTATCGGTTCAAGGACGCAAGGTGTCCCTGTTTTTTCAGGGGAAGAAGGGGGA
>SRR492407.102526622
CTAAGTCAAAGGGTCGAGAAACTCAAGGCCACTATTCTTGAACAACTTGGATTGGAGCCGGGCTTTCCTTTCGCACTTTATACGGGTATGAAATGAAAATA
>SRR492407.102529562
GCTTCACGACCCGGCGGTCTTCGTAATAGAAGAGACATTTGTCGATAAGCTTGTGCTTGTTTGGAAAGATCATCATAAATTATTAAAGTGTGTTGTTTACG
>SRR492407.102531972
TCTCGTGGATTTTCATAATTCTGCTGGGCAAAAATCGGATATTCACTTGAAATGGATGCCCAAGATCGGAAGAGAACACGTCTGAACCACAGTCACCTTGT
>SRR492407.102537132
CCCTATGAAGACTCGCTTTCGCTACGGCTCCGGTGGGTTCCCTTAACCAAGCCACTGCCTATGAGTCCCCGGGTCATTCTTCCACCGGCCCCCGGTGCGGG
>SRR492407.102537522
GTGAAATGCGTAGAGATCGGAAAGAACACCAACGGCGAAAGCACTCTGCTGGGCCGACACTGACACTGAGAGACGAAAGCTAGGGGAGCGAATGGGATTAG
>SRR492407.10254182
CCACCATTAGTCTACTGAAGTATCAAGTATCATCTACTGAAGTATCATGCTCGTTTTCCTAATGGTGACACGAGGATTTCGAGTCCTCTGCAAAAAAGCTA
>SRR492407.102543042
GCTGCGGCTTATATAGGTGAGTCTATGGAAGGTCATCATTAATGGTTTTTTTTTTTATATTTTTTTTTTGGTTAACCCAATTAATTTTAGAAAATTTGGGT
>SRR492407.102547742
ACTCGATTTCGTTGGTCCCACCCAAGCGGATGTGGAATTCAATTTTTTATTCATTCAATGAAGGAATAGTCATTTTCAAGATCGGAAGAGCACACGTCTGA
>SRR492407.10254992
TGATTTAGTGTCGCGGGCTGCAATACGGGCTCGGTGTCATTATGTTAATAAAAAATGGCTCCGCGGCCCGTTTAAAAAAATGGCCACTCCCCAAAAAAAAC
>SRR492407.102551342
GATGCATTAACATTTCCCTTTTTTTCATTCTAGTTATTAACATCAGAAAGGGGTGAAAAATTTAGAGATACAATCAACAATCGGGGACTAACCCCCCCACC
>SRR492407.102553552
GATCTGCCGAAGCTGTGGGATGTCAAAATGCATCGGTAGGGGAGCGTTCCGCCTTAGGGGGAAGCAACCGCGCGAGCGGCGGGGGGCGGAGGGGGGGGGGG
>SRR492407.102554922
AATAATTAGATAAATCTGTTCCGAAAACAAAAAAAATTAAGAGCCTTGAGCCAATAAAAACTAAGAAAATTGACTCAAAAACAAAAACAAATAAAAAAAAT
>SRR492407.102563102
GTCTATCGTTGGCCTCTATGGTAGAATCAGTCAGGGGCCTGATAGGCGGTGGTTTACCCTGTGGCGGGTGTCCGCGGGTTGGGTGCCGCTTTTTTCCAACC
>SRR492407.102563172
TGTCACCATTAGTAAAAGCAAGATGATCCTTCGGTAATGGTCGACATAGCTTAGTTGCAGAGGACTGAAAATCCTTATGTCACCATTAGTAAAAGCAAGAT
>SRR492407.102563502
TAAGTCTTTACATAATCTTCTTCTGTCCGAAGAAATGATTCATCGAAATAATGAGTCATCATTGATATCGACACATCTGAGATCGCCAAATGTTCGTGAGG
>SRR492407.102565892
TATCATGTGACACAGGGATTTTCAGTCCCCCGCAATTAAGCTATGCCGACCATTACTGAGGTATCATCTACTGAAGTATCATCTTGCTTTTACTAATGGTG
>SRR492407.102574322
AGTAACTTTTGTAAATTAAAGGCTGTTCTTGAATATAACATATGCATAACATCCTTTTTTGTTAAGAATAAAATAAAGGTTTTTTTTCAAGAGATCGGAAG
>SRR492407.10257482
CTTGTTCCGACCTAGGATAATAAGCTCATGGGTTTGGTCTTACTTCACCGTCGAGAAACGAAAGAAGGCTTCCACCTCCAAGTTTAACTCAGACGTAGCTC
>SRR492407.102576922
TAAGGTCGATTGGTTTATGCGAATTGATTTTCTGTTACGATAAATTGACGAGACTATAGCTAATCCAATAGCTGCTTCAGCGGCTGGCATTTTTTTAAACA
>SRR492407.102581892
CAAGTTCCTAAAAGGGCCAGCTATATCAGAGTAATTATGCTGGAATTGAGTCGTATAGCTTCTCATCTGTTATGGCTCCCCCCCTTTCTTGCGTGGTATTG
>SRR492407.102583622
TTGAAAATACACTTTAGAAAAAAAAAGAGAAAACAGCCTAATACTAATAATTGTATCTACATCAATTCATATCCATTAGATTCTAATTTCACTCTATTTAG
>SRR492407.102590032
AACGCTGGCGGCATGCTTAACACATGCAAGTCGGACGGGAAGTGGTGTTTCCAGTGGCGGGGGGGGGGGGGACGGGGTACAAACCGCCCCTGGGGGGGGGA
>SRR492407.102590802
TGGGATGTCAAAATGCATCGGTAGGGGAGCGTTCCGCCTTAGGGGGAAGCAACCGCGCGAGCGGCGGGGGAGGAAAGGGAAAGGGGAAGAGCGGGATGGAG
>SRR492407.102595172
GAGACATTGTAGAATAGGCTAAACCCCGCTTAATGTCTTTTTGAGCAAGAGCTAAAGTGGCTCCTTAGAGTACTGTTATTATAACTTTCAAAGATATTATA
>SRR492407.102598932
TATTCAAATTTATCTATTTTTTTTTGTTATCCCGTCTCATTCTGCGAAATAGAAAAACCTTTTCTATTATATCATCAGGGTAATGATCCATCAACCCGCTA
>SRR492407.102600472
TGTAGGAGTAACCCATTACCTTCTGGGTGGAATTGCCACAACATGGGCGTTCTTCTTAGCAAGAATTATTGCAGTAGGATAATGGCTAAGAGGGACTTAAA
>SRR492407.102604512
CTATTTTCATAGTTCAACTCTTTGACAACACGAAAAAACCATTGTTCAACTCTTTGACAACATGAAAAAACCTAAAATTCTGCCCTTCTATCCAAAGGATG
>SRR492407.102604572
CTTTCGTTTTTTCTTCCTACTGCCTAATTTCAAAATACTTCAATTGGTACACGCAAGAAGTAAGCCAATTCAGCAGCTTTTTGCTCAATTTCTCGTGTAGT
>SRR492407.102615592
AGATCTATAGAGAGTCTTCCATCTTTTTGCATTTCCCGAAAATTCCCTGTTGTTAGATCAGATTCTAATCAATTTTGTAGAAATTTGTAATGGAAGAAAAA
>SRR492407.102620862
TGTGACACAGGGATTTTCAGTCCCCCGCAATTAAGCTATGCCGACCATTACTGAGGTATCATCTACTGAAGTATCATCTTGCTTTTACTAATGGTGACATA
>SRR492407.10262212
TGAAATAAAGCAGATCGATAAGACCCCATACCTAGAGCTAACATCATATAACCGAGTTGAGACATTGTAGAATAGGCTAAACCCCGCTTAATGTCTTTTTG
>SRR492407.102623152
ATATATAATATAAAGATAAAGAATATCTATAACAAAAAAAGAAAGCTTTTTAAGAATAAAGTGGAGAAGGTTCTTTTTCAAGCCTTTTTTTTTTTAATGAA
>SRR492407.102624612
GGGGGGGAGTTCTTGTCTATCGTTGGCCTCTATGGTAGAATCAGTCAGGGGCCTGATAGGCGGTGGTTTACCCTGTGGCGGGGGGCAGGGGGTCGGGGGCG
>SRR492407.102626462
ACCGCAAGGAGGGGGGTGCCGAAGGCAGGGCTAGTGACTGGAGTGAAGTCGTAACAAGGTAGCCGTACTGGAAGGGGGGGGGGGGGACCACCCCTTTTTCG
>SRR492407.102627832
TCTCAACCCATGACCAATATGAACTCGAAGTTTCCTTCGTAACCCCCGGAACTTCTTCGTAGTGGCTCCGCTGCATTCCCCATTTTATAGTTGAACTCCCA
>SRR492407.102632902
TACTTTCTTGAAATTGATAGGTTGAAAATACACTTTAGAAAAAAAAAGAGAAAACAGCCTAATACTAATAATTGTATCTACATCAATTCATATCCATTAGA
>SRR492407.102638022
GCTGCAACAGGAGCTGAATATGCAACAGCAATCCAAGGACGCATACCCAGACGGAAACTAAGTTCCCACTCACGACCCATATAACAAGCTACACCAAGTAA
>SRR492407.102644412
AGTAAATATATATCTAATATTAATATACAACCTAATAGAAATATATAGAATAGAACCGAATAGAAATAGAATAGAAATAGAATAAAAAAATAGGTACAAAA
>SRR492407.102649912
GGAATTTCCGGTGGAGCGGTGAAATGCGTAGAGATCGGAAAGAACACCAACGGCGAAAGCACTCTGCTGGGCCGACACTGACACTGAGAGACGAAAGCTAG
>SRR492407.102650352
AGGCTAGAAAGAGGGCATTCTTTAACCCGACTCGATTTTGTACGTATATACTATATCATACATAGTATATCATAAATTAGATCGGAAGAGCACACGTCTGA
>SRR492407.102652202
GTGAGTTTTTCTATTTTGACTTGCTCCCTCGCTGTGATCGAATAAGAATGGATAAGAGGCTCGTGGGAGTGACGGGGGGGGGGAGGGGGGGGTAAATTTTT
>SRR492407.102653572
AAAAAGTGAATTATAATTCCATATTACAATAATTTATATACATATATTAAGAATAGAACAAATATTAAGAATAGAACAAAGATTTCCACGACAAAAAAAAA
>SRR492407.102658482
TGGGTGATGGTATTCTGCCTAAATAGTAGACACAGGTAATAAATAAGAGAATACTAAAGATTCGAGCCATAGAATTTCTCAATTCTGACACAAGGAACTTA
>SRR492407.102663172
TATTGCTAATTGCCCGAAATGAGAAGCAAAAATATTCTGATAAAGACGTTCTTCAGTAATATCATCATGACTCTCGAAGTCATGTGCGGTAGCAATACCAA
>SRR492407.102663952
AATACTTGTATGCATCAAAAACCTCAGGTTCGTCGGGGTAAATGCATTAAAAAGGGACAAATTTTAGCGGATGGGGCTGGCTAAATTGGGGGGGGGACTTG
>SRR492407.102667502
CGCTGGCGGCATGCTTAACACATGCAAGTCGGACGGGAAGTGGTGTTTCCAGTGGCGGGGGGGGGGGGAACGCGTAAGAACCCGGCCCTGGGGGGGGGACA
>SRR492407.10266812
GTAATGGTCGACATAGCTTAGTTGCAGAGGACTGAAAATCCTTATGTCACCATTAGTAAAAGCAAGATGATACTTCAGTAGATGATACCTCAGTAATGGTC
>SRR492407.102671512
TGCGGGCTGGTTATTCGTCAGCACCGGTTTAGCTTACGATGTGTTCGGGAGCCCTCGTCCAAACGAGTATTTTACAGAGAGCCGACAAGGCATTCCATTAA
>SRR492407.102675752
TACTCACATTGGACCTAGTGCTCAGGTGGTTTGGCCAATAGTGGGCCAAGAAATCCTGAATGGAGATGTGGGCGGAGAGATCGGAAGAGCACACGTCTGAA
>SRR492407.102677772
GCTTGATTTAGATCGGGAGAATCGTACGGTTTTATGAAACCATGTGCTATGGCTCCAAACCCTAGGCAATCCCATTTTCGATCGGAGGAGATGGCAAATGA
>SRR492407.10267872
AAAAGGGGATCCTATCAACTTGTTCCGACCTAGGATAATAAGCTCATGGGTTTGGTCTTACTTCACCGTCGAGAAACGAAAGAAGGCTTCCACCTCCAAGT
>SRR492407.102684912
TAATAGAAATATATAGAATAGAACCGAATAGAAATAGAATAGAAATAGAATAAAAAAATAGGTACAAAAAAAGCCAAACTAAATAAATGGACTTATTCATC
>SRR492407.102686772
TAATAAATAAGAGAATACTAAAGATTCGAGCCATAGAATTTCTCAATTCTGACACAAGGAACTTATACTTATTAGATCTAATAAAGATCGGAAGAGCACAC
>SRR492407.102687542
AATCTTGATAGAATTAAAAAAACTACAAAAAAAATCCAGAATTTTGTGATTTCTGGGCTTAAACAAAAGGATTCGCAAATAAAAGCGCTAATGCTACAACC
>SRR492407.102689232
CCTGGATACCGAAGGCGTCCTTGGGGTGATCTCGTAGTTCCTACGGGGTGGAGACGATGGGGTCGGTCCATGGATTTTCCTTCCTTTTGCCGCATTTTGCT
>SRR492407.102694902
CAAATCCCAGGGCTCAACCCTGGACAGGCGGTGGAAACTACCAAGCTTGAGTACGGTAGGGGCAGAGGGAATTTCCGGTGGAGCGGGGAAATGGGGAGAGA
>SRR492407.102695172
TTGCAAGGTGGTCCTTGCTGATTCACACGGGATTCCACGTGCCCCATGCTACTCGGGTCAGAGCATAAGCTAGTGATGCTTTCGGCTAACGGGCTCCTCCC
>SRR492407.102695352
TAACAAGAATTCTTGGAATTCCTTGGGGATTCTTGATTGGTGCTGAGTTAACTATAGTGCAAAGTCGTATTTCTTTGGTTAATAAGAGATCGGAAGAGCAC
>SRR492407.10270032
GCCTCAACAGCAGCTAGGTCTAGAGGGAAGTTGTGAGCATTACGTTCATGCATAACTTCCATACCAAGGTTAGCACGGTTAATAATATCAGCCCAAGTATT
>SRR492407.102702402
CTACATGACCTGATCAATTCGATCAGGCACTCGCCATCTATTTTCATAGTTCAACTCTTTGACAACACGAAAAAACCATTGTTCAACTCTTTGACAACATG
>SRR492407.102703942
CGTTCGAGCTTTTCCTGGGAGTATAGCATGGGTTACTTCAGCGCCGTAGCGCCTGGTACTCGAACATTGGCTCCGGGGAATTTCCCTACCCCCTTTTATCC
>SRR492407.102704982
ACGGTTAATAATATCAGCCCAAGTATTAATAACACGTCCTTGACTATCAACTACTGATTGGTTGAAATTGAAACCATTTAGGTTGAAAGGCATAGTACTAA
>SRR492407.102712922
AGAATAATAAATCTAACAAGGGGATTATGATACATCTAGTTGTAGTTGATTTTGAAAGATGAATAAGTCCATTTATTTAGTTTGGCTTTTTTTGTACCTAT
>SRR492407.102713962
ATTGTCGACTAGAACGATCTTATCGATTCCATTTGAAAACGTAAAGGCCTATTTATGTAAAATTGAGAGAATAAAAAAAAAAAAGTAAATTTTTTAATTAT
>SRR492407.102714942
TGTGGCTGAGAGCCCTCACAGCCCAGGCACAACGACGCAATTATCAGGGGCGCGCTCTACCACTGAGCTAATAGCCCGTCGTATCGGGCTCCCGGCTCGGG
>SRR492407.10272002
ACGTCTCGAATGAATTCAAGGACAAATTCAAAGAAATTTTGGCCGTCAGTTGGAATTGTTTGTGGATTTGGGATAGCGTGAAAAAGGGGAACCAAAAAAAA
>SRR492407.102721682
GACCCTTTGTCCCGGCCATTGTAGCACGTGTGTCACCCAGGGCATAAGGGGCATGATGACTTGACGTCATCCTCACCTTCCTCCGGCTTATCACCGGCAGT
>SRR492407.102724192
GAATTGAAGGGTGATATAAAATCGGTCTATTTCCAACATCATATCCATAGTTAGCGCATTCATCATAGTTAGAAGCTCCAGCTCCGTATCAAGTTCACGAT
>SRR492407.10272442
AATAACCGAGCCGGATCTGGTGTATCATAAGGGATTTGCCTTTTCTATTGATTCCTACGGATTGGATCAAAGACAATTCTTGAAGGAGGTTTTCAACTTCA
>SRR492407.102727472
TATGAAAAAGTAATAAGAATGAGAGGTGTTAAGCTTTTCATCATCCTGGCGTCGAGCTATTTTTCCGCAGGACTCCCCTACAGTATCGTTCACGCAGGAAA
>SRR492407.102729312
GGTCGTTCGAGCTTTTCCTGGGAGTATAGCATGGGTTACTTCAGCGCCGTAGCGCCTGGTACTCGAACATTGGCTCCGGGCCGTTTTTCTTCTCCCTCTTT
>SRR492407.102730532
CTCTATAAGAACGGTGCGTTCCGGGGTGTGAAGTGGGATGATTTCATAATTGGGGTTTTGAATAAGACAACCTTTTCATTTTTCATTTTTTTTTCAATTTG
>SRR492407.102730992
CTAAGATCAGGCCGAAAGGCGTAGTCGATGGACAACAGGTGAATATTCCTGTACTACCCCTTGTTGGTCCCGAGGGACGGAGGAGGCTAGGTTTACCGAAA
>SRR492407.102734292
TCCGAATGAATCATCTTTTTCGCGGAGTGAAATCTTTGCCTGCTAGGCAAGATGATAGGATAGCAAGTTACAAATTCTGTTTCGGTAGGACATGTATTTCT
>SRR492407.102738362
AAATTTAATTGAATGAACGGAAAAAATCATAACATACACAAAGTTTTCTTTGGTCTTTAATAATTTAGAACATTTTTTATTGACGAGCCACAGAAATTGCA
>SRR492407.10274182
TACAATGCAATTATTGCATATAAATTAACCTTTTGTCGAACAAAGTAATCGGGGGTGTAATAAAAAAATCTGAAAAAATTTAGAAAAAACTAGAGTTGACT
>SRR492407.102748242
GTATCAAATCCAATAAAAAAGAATCGATATAAGATCTACCTTGTTTTGATTTTGAAATAGATTCTCTATTCCTAATTTCTTTCATATGGAAAATGCTGGGA
>SRR492407.102752632
AGCCGAACACGAGGGAAAAATCCTTTATACTGACACTGAGAAGATCGTTTTTTCGGGCAATGGTGATACTCTAAGCATTCCAAGATCGGAAGAGCACACGT
>SRR492407.102754842
CAGCACTGCACGGGTCGATACGCACAGCGCCTAGTATCCATCGTTTACGGCTAAGACCACCGGGGGATCTAAACCCATTCGCTCCCCCAGCTTTTCTCTCC
>SRR492407.102757212
ACCCAAGGGTTCCTCCGCAAGGTTCGTCCACGGAGGGTGAGTCAGGGCCTAAGATCAGGCCGAAAGGCGTAGTCGATGGACAACAGGTGAATATTCCTGTA
>SRR492407.102758292
TTATACTTCGGTAATGGTAGACATAGCTTAATTGCGGGGGACTGAAAATCCTTGTGTCACCATTAGTAAAAGCAAGATGATCCTTCGGTAATGGTCGACAT
>SRR492407.10275852
AAGTTTTGAATCTTTGACTTTTTATAAATCCAAATATTTAATATTAAAATATTAATAAAATCACTCTTGACAGTAATATCTGTTGTATATGTAAATCCTAG
>SRR492407.102762202
AAGTATCATCTTGCTTTTACTAATGGTGACATAAGGATTTTCAGTCCTCTGCAACTAAGCTATGTCGACCATTACCGAAGGATCATCTTGCTTTTACTAAT
>SRR492407.102768182
TCTTGGACAAGCCAGCCCTTAGAAGGTATCGTTAAAAGATCATCAATTCCTAATGAAATGGATGTAGCAGTGGCTTTGTGGGAAACCCCAGGCTTTTATTT
>SRR492407.102768462
AAATCCGCACAATTTCCTCTTCATGTATGGTTACCTGATGCCATGGAGGGCCCTACTCCCATTTCGGCTCTTATACATGCTGCTACTATGGTAGCGGGGGG
>SRR492407.102772022
TAATATATTCGTAATTACTTTCTTGAAATTGATAGGTTGAAAATACACTTTAGAAAAAAAAAGAGAAAACAGCCTAATACTAATAATTGTATCTACATCAA
>SRR492407.102779062
GGATGTAAAATATATCTCTTCTCACCATCCCCATAGTGTATGAGACAAATGTATGCATTTCGATTAGGGTCGTATTCTATGGTTACGATTCTACCGTATAT
>SRR492407.102786602
AACAAGTTTTGATTCAATCGTCGAGATTAAAATTTAAATAAAGAAGCCAATTTATTAAAATTTCAATTGACTTTTTGTCCTTTATATTTTTTTCGAGAATA
>SRR492407.102788322
TAAGACCAAACCCATGAGCTTATTATCCTAGGTCGGAACAAGTTGATAGGATCCCCTTTTACGCCCCCATGTCCCTCTCGTGTGGCGGCAGGGTGGCGCAA
>SRR492407.102789032
[truncated: 588,561+ more rows]

## Sheet: polIb
FASTA format	Assigned as rearrangement by BLAST+ analysis
>HWI-ST942:56:C4CFMACXX:7:1101:10015:739581
TACCATCAGGATAAATCTGACCCCTTCCCCTGTTTCCACCTACATATATAGGATATTTA
>HWI-ST942:56:C4CFMACXX:7:1101:10509:624181
AAGAGACTTTTTCAAGTTTGAATTTGTTCATTTGGAATCTGGGTTCTTCTACTTCATTTTGATTTACTTATTTTTTCTTTATTTTCTCTAAGTGAAGAAT
>HWI-ST942:56:C4CFMACXX:7:1101:10643:389391
TTACGAAGTAGACTTATAATTTTTTTCCATTGCACATTGTAGAATTCTAAGTTTCAATAATAATAATAATAAATTTCTTTTCATGAAAGTAAAAAAAAAA
>HWI-ST942:56:C4CFMACXX:7:1101:10698:849811
GTAACGAGGTATCTATTTTGATCAATTTTTTTTATCGGACATACATTTAATTCTGAAATTTATGATATACTATGTATGATATAGTATATACGTACAAAAT
>HWI-ST942:56:C4CFMACXX:7:1101:10799:818931
GAAGGGGTACGAAATAAATTCAATCAGATTTATTTTTGATCAAAAAAAAAAAAAAAAACACTTTGGGAAATTTTCGTTTTTTTTTTTTTTTTTTA
>HWI-ST942:56:C4CFMACXX:7:1101:10833:48561
GCTGTACTTATGGGAAAGCGATAGAGAAAGAGAAAAAAAAAACGAAGATTTCACATAGTGATTTTTTTTTTTTTTTTTTTTTAAAAAAAAAATTTAATTA
>HWI-ST942:56:C4CFMACXX:7:1101:10899:928091
GTTATTTTTAAATAAATAGAATTAATCTTGGATTCCATTTCGAAAAAGACATACACAAATTTAGAAGAGATCAGATGAAATTGAATATCATGATTAATA
>HWI-ST942:56:C4CFMACXX:7:1101:11053:785981
ATATGTTCTTTTTTTTTTCATCTTTGGCTTAAATTTTCAGAAATAGTCGAACGGTCGATTCTTTTTTTTTTTTTTTATTTTCTTGAAACAAAATTTTTAT
>HWI-ST942:56:C4CFMACXX:7:1101:11423:637401
GTAGACATTCATAAACTGCTCTACCATAGTTTTTAGCGGATAACCCCCATTTTGGTTTAATAGTACA
>HWI-ST942:56:C4CFMACXX:7:1101:11510:1003341
ACTCCCATTTCGGCTCTTATACATGCTGCTACTATGGTAGCGGCGGGGGTTTTTTTTTTTGTTCCTCTTTTTTCTCTTTTTTTTTTTTTTCCCTCTTTTA
>HWI-ST942:56:C4CFMACXX:7:1101:11712:870621
ATCCTATAGAATCTGACCCATTTTCTCATTGAGCGAAGGGGTACGAAATAAATTCAATCAGATTTATTTTTGATCAAAAAAAAAAAAAAAAAAAAAACTT
>HWI-ST942:56:C4CFMACXX:7:1101:11767:276031
TTATATAACACGATACAGACAGTAATAAAAAATTGCAGTCTTCTTTTTTATGTTTAAAAATAAAATAAGCAATTCTATAAGATTGAATAAAAATTTCCAT
>HWI-ST942:56:C4CFMACXX:7:1101:12152:284091
GTGGGGTTACCATTCTCTCTTTTTTTTTTCGTTATCTCGCATGTGGTCCTAAGAAAAGGGAATTTGTCGATTTTTCGGGGTCTTAAAGGGGCGTGGAAAC
>HWI-ST942:56:C4CFMACXX:7:1101:12170:905311
TGAACCCTCGTTTTTATGACCTTTCCCCCCCCCCCCGGTTAACGGTACCGATAACCGACGATCCAACACTACCTGTGCTAACGTTTCGAACATTGA
>HWI-ST942:56:C4CFMACXX:7:1101:12236:60671
TAACTATAAAAAAATTTTTCTAGGTCACTAAAATCATTGTCAATCTCAAAAATTTTTTTTTTTTTTTTCAAAAAATATAAAAAAAATATTTTTTTTACTT
>HWI-ST942:56:C4CFMACXX:7:1101:12248:695351
TACCAAAAGATTCATAGTGAACTTCGATAGGAACTTCTCTTGAAGCAATAACGCGTTGATCTAATTGCCACCGAAGCCACAAAGGACTATCTAAATT
>HWI-ST942:56:C4CFMACXX:7:1101:12699:333741
AGAAAATAAGTGTTTAAATGTCCTTCAAAAGTAAGTAAATAAATCCGAAACATATAAAATGCGGTTAATCCCGCTGTTGAACAAGCTATTATTGCAAAAA
>HWI-ST942:56:C4CFMACXX:7:1101:13057:128321
GGGGGGGTTGCTAACTCAACGGTAGAGTACTCGGCTTTTAAGTGCGACTAGCATCTTTTACACATTTGTATGAAGAAAAGGATTCGTCCAGATCTGCGGT
>HWI-ST942:56:C4CFMACXX:7:1101:13143:528731
ATATTATATACATTATAGAAGGGATAACGATAAAAAGAGGAAGAAGACGAGCTACAAGAAAAATACCCGCCGCTACCATAGTAGCAGCATGTATAA
>HWI-ST942:56:C4CFMACXX:7:1101:13376:23781
TTTTTTTATTGAAGAGTTTTTTTTCTATCTAAATTTAAGTATGTATCTATCAAAAAAAATAGTATATACAACAGATAACCTCTGATCGAAACTTTTTTTT
>HWI-ST942:56:C4CFMACXX:7:1101:1351:682151
GATCTTTCCAAACAAGCACAAGCTTATCGACAAATGTCTCTTCTATTACGAAGACCGCCGGGTCGTGACGCTTCTCCAGGGGGCGATTTTTTTTTATATT
>HWI-ST942:56:C4CFMACXX:7:1101:13568:439501
AGAAAAGGTTTTTCTATTTCGCAGAATGAGACGGGATAACAAAAAAAAAAATAGATAAATTTGAATAACCGTACAGGCTTTTTTTGTGCATTGCATACG
>HWI-ST942:56:C4CFMACXX:7:1101:13653:672741
CCTTCTTTGGATTTGCCCAAGATTTTTGGAATTCATTTATTTCTTTCAGGAGTGGCTTGCTTCGGGTTTTGCGGCTTTTATGTTACAGGATTATATAAAT
>HWI-ST942:56:C4CFMACXX:7:1101:13709:362661
TATACTTTCTTTTTATATTTGAAGTGGAAATATTAAAATTAAAAAATAAATAAAAAAAAATCTAAAAATCGTCTAGTACGGAATCTTTTCAAGAAGT
>HWI-ST942:56:C4CFMACXX:7:1101:13784:239351
TGTGTCACCATTAGTAAAAGCAAGATGATCCTTCGGTAATGGTCGACATAGCTTAGTTGCAGAGGACTA
>HWI-ST942:56:C4CFMACXX:7:1101:13785:969541
CCACGCCCCACGCCGGGTTTACGGGTTGTACCTTTCCGGTTAGTCCATAAGGGTCGGATACCCATATTCCAGGACCATATAATCCTGTTACATGAAATGC
>HWI-ST942:56:C4CFMACXX:7:1101:13875:823401
TCCTTGATAATCGAAGCCCAACGATCTATGAACCAGCCCGCGTTTGGGTAAGCAAAAGGGAAAAATGCCCCGCGTCTTTTTTATTTTCCCCACCCCCTTT
>HWI-ST942:56:C4CFMACXX:7:1101:13897:360571
AAATCTTCTTCATGTAAAACCGGCTTGATTTAGATCGGGAGAATCGTACGGTTTTATGAAACCATGTGCTATGGCTCGCACCCCTAGTTAATACCATTTC
>HWI-ST942:56:C4CFMACXX:7:1101:13900:335111
AAGCAGAAAATTTTTTTGATTTATTAAAGTTTATAAGATAGAACGGAAAGAAGTCGGGCAACAGGTTTTAGGAATTTAATATTGATTCTTAGTTCGATAC
>HWI-ST942:56:C4CFMACXX:7:1101:13903:483341
TGGAGTCCTGAACTAGCTGCTGCTTGTGAAGTATGGAAAGAGATCACATTTAACTTCCCAACCATCGATAAATTAGATGGCCAAGAGTAGATGAATTA
>HWI-ST942:56:C4CFMACXX:7:1101:13905:652901
TGAGTCTAATGCGTTCCTTTCATTTAAGACGAGAAATTGAAATCTTTTTTTTTTTTTTTTTTTTAAAATTTTTTTTAAATTTATTATTTTTTATTAACGT
>HWI-ST942:56:C4CFMACXX:7:1101:13944:97981
ATCACTAAAATACTCCTAGAGGGGGATAGGGCTAAGCGGAGCGAAAAGGGTTTTCCATGAGACGGGAAATGAAAACTATAGATCGGGAAGAGCACACGTC
>HWI-ST942:56:C4CFMACXX:7:1101:13967:375911
ATAATAGAAAAGGTTTTTCTATTTCGCAGAATGAGACGGGATAACAAAAAAAAAAAAAAAGAAAATTTTAAAAAACCGTCCGGGCTTTTTTTGGCCATTA
>HWI-ST942:56:C4CFMACXX:7:1101:14245:805541
ATGGTTACCTGATGCCATGGAGGGCCCTACTCCCATTTCGGCTCTTATACATGCTGCTACTATGGTAGCGGCGGGGTCTTTTTTTTTTAGTCTGTTTCTT
>HWI-ST942:56:C4CFMACXX:7:1101:14356:561951
TAATAATATCGATTCATAATGGATTCATATCGATACAGAAGAAAAGGTTCTCTATCGATTCAACAAGTGCTGTACTTATGGGAAAGCGATAGAGAAAGA
>HWI-ST942:56:C4CFMACXX:7:1101:14450:72581
CGGAGAAACTTTCTAGTTATGAATCAGGTATAGAACCGATCGGGGATGCTTGGTTACAATTTAGAATCCGTTATTATATGTTTGCTCTAGTTTTTGTTGT
>HWI-ST942:56:C4CFMACXX:7:1101:14510:376921
GTTCCCTAGCAACACTTTTTTTCGTTCTATTACTAATTTCATTGGATCCTGAACCCTCGTTTTTATGACCTTTCCCCCCCCCCCCCCCCCCCCTCCCCAC
>HWI-ST942:56:C4CFMACXX:7:1101:14552:330981
TTTATAGAAGCTTTCATTTTCGTGCTTATCCTAATTCTTGGTTTAGTTTATGCATGGCGAAAAGGAGCATTGGAATGGTCTTAGTTCGTTTACCGAATAC
>HWI-ST942:56:C4CFMACXX:7:1101:14555:635711
GTATTTGGATATTCTTTATCTTAATGATTTGGTCAATCATGAATAATTGGGTTCTGAGACCCCATAAATGAAATCGAAATTTATTAAAATTTATGCAGA
>HWI-ST942:56:C4CFMACXX:7:1101:14567:959741
ACTATCTATTCTTTTTTGTATTGTCTAAAAAAAAAAAAAAATAAAATTTTAAATAAAAAAAAAAAAAAGGTAAAAATTCCCACCTTTTTTTTTTTCTAAA
>HWI-ST942:56:C4CFMACXX:7:1101:1490:137891
TTTTTTCCAAATGAAATTTTTAATAATTTTTTTTTTAGCCCCCATATATCAAACGAAAAAAAAAAAGTTTATCTATTTTTTCAAAAAAAAGGGGGGAATT
>HWI-ST942:56:C4CFMACXX:7:1101:14983:940901
AGACTTATAATTTTTTTCCATTGCACATTGTAGAATTCTAAGTTTCAATAATAATAATAATAAATTTCTTTTCATGAAAGTAAAAAAAAAAAAAAAACCA
>HWI-ST942:56:C4CFMACXX:7:1101:15007:999471
ATGCTTGTGATAAAGAGCATAGGTCATAACTCATTTTTTTTTTATTGGATATTAAATTTTTTATAGTCGAAATAAAATAAAGAGATCGGAGAGCACACGT
>HWI-ST942:56:C4CFMACXX:7:1101:15044:1003351
TTTACGCCCCCATGTCCCTCTCGTGTGGCGGCAGGGAGGCGTAAAAAGGAAAGAGAGAGATGGGGTTTCTCTCGCTTTTGGCTTGGCATAGCGGGGCCCC
>HWI-ST942:56:C4CFMACXX:7:1101:15178:847351
AAAGGCCTATTTATGTAAAATTGAGAGAATAAAAAAAAAAAAAAAAAAATTTTTTAATTAATCTTTTTTTTATCTGATTAGAAAAAAAAAGAAAAAAAAA
>HWI-ST942:56:C4CFMACXX:7:1101:15241:733301
ACAAATGTGTAAAAGATGCTAGTCGCACTTAAAAGCCGAGTACTCTACCGTTGAGTTAGCAACCCCCCCCAAAAAAAAAAAACCTACCCCGAAAACGTA
>HWI-ST942:56:C4CFMACXX:7:1101:15265:216081
ATGGCCAAGAGTAGATGAATTAGATTTAGTAATTCACGTTTGTTTTATTAGTTTAATTGCACTCGGCTCAATTTTTTTTTTTCTAAAAAAAAATGAGCC
>HWI-ST942:56:C4CFMACXX:7:1101:15356:849441
ACTTATGGGAAAGCGATAGAGAAAGAGAAAAAAAAAAACGAAGATTTCACATAGGGATTTTTTTTTTTTTTTTGTTAAAAAAAAAATTTGATTAAATTTT
>HWI-ST942:56:C4CFMACXX:7:1101:15370:29391
AAATAAGTAAAAGATACAAAAAAAAAAGCTATATTAATAAAAAATTTTTTGAAAAATCCATTACAAAATATCAAAACAAAACTGTAAATAAAAAAAAAAA
>HWI-ST942:56:C4CFMACXX:7:1101:15370:565601
AATCTAAAAATCGTCTAGTACGGAATCTTTTCAAGAAGTGATTGGTCTAACATAAAAAAAAAAAGAAAAAAAGAGGGGTAAGTTTCGTTTA
>HWI-ST942:56:C4CFMACXX:7:1101:15438:237321
GATATAGTATATACGTACAAAATCGAGTCGGGTTAAAGAATGCCCTCTTTCTAGCCTTTTCGTTTTTTAGAAAAAAAAAAAAAAAAAAAACCCTTAATTT
>HWI-ST942:56:C4CFMACXX:7:1101:15564:20861
NATTATGCTGGAATTGAGTCGTATAGCTTCTCATCTGTTATGGCTCGGCCCCTTTTTGGCAGATATTTGGGCACAGACTCCCTTTTTTTTTATTTTTT
>HWI-ST942:56:C4CFMACXX:7:1101:15721:227321
AATAGTGGAGTGTATTTCACGTCATTTATCATTATCATTTAGTTCAGTTTTAATTTTATTTAGTTTTGTACAATTTCAATCAAAAAAGGAGTCTTTATGT
>HWI-ST942:56:C4CFMACXX:7:1101:15747:474061
TATATATTTTTTATTAGAAAAAAAATAAGGTGGAATTTGCTACCTTTTTTTATTTTTTATTGAAATTTGTATTTTTTTTTTTTTTTTAGAAAATACAAAA
>HWI-ST942:56:C4CFMACXX:7:1101:1580:39891
TAATATCTGTTGTATATGTAAATCCTAGATATGACAATATGCGGAATTCATCATGAAAAAGAAAAACAAGGGGGGGTTGCTAAAGGGATGAATAAATGG
>HWI-ST942:56:C4CFMACXX:7:1101:1601:322531
TCACTGTTCCCTGGGATTGGCTTTGGGCTTTTCCTGCGCAGCTTAGGTGGAAGGCGAAGAAGGCCCCCTTCCGGGGGGGCCCGAGCCATCAGTGAGATAC
>HWI-ST942:56:C4CFMACXX:7:1101:16153:998111
[truncated: 109,971 more rows]

## Sheet: reca1
FASTA format	Assigned as rearrangement by BLAST+ analysis
[truncated: 118,932 more rows]

[truncated: 17 more sheets: why1why3, why1why3polIb, why1why3reca1, reca1polIb, Col-0 mitochondria, Brain 1, Brain 2, Brain 3, Brain 4, Liver 1, Liver 2, Liver 3, Liver 4, E. coli 1, E. coli 2, E. coli 3, E.coli 4]
