# Supplementary material for: Organelle DNA rearrangement mapping reveals U-turn-like inversions as a major source of genomic instability in Arabidopsis and humans
Source: HighWire-hosted journal article supplement (doi:10.1101/gr.188573.114), 2015-03-23
Supplement: Supplemental_Data_File_2.xlsx [file Supplemental_Data_File_2.xlsx]

## Sheet: Col-0
Read Identifiant	Match %	Aligned bases	Mismatches	Gap Openings	Start Pos. Read	Stop Pos. Read	Start Pos. Genome	Stop Pos. Genome	Expect Value	Bit Score
HWI-ST942:56:C4CFMACXX:7:1101:16371:512841	100.00	36	0	0	1	36	86822	86787	4e-14	67.6
HWI-ST942:56:C4CFMACXX:7:1101:16371:512841	100.00	52	0	0	37	88	86786	86837	5e-23	97.1
HWI-ST942:56:C4CFMACXX:7:1101:17366:201792	89.13	46	5	0	1	46	5629	5584	3e-11	58.4
HWI-ST942:56:C4CFMACXX:7:1101:17366:201792	100.00	78	0	0	21	98	5576	5653	2e-37	145
HWI-ST942:56:C4CFMACXX:7:1101:4849:810892	97.40	77	2	0	1	77	3178	3254	2e-33	132
HWI-ST942:56:C4CFMACXX:7:1101:4849:810892	95.35	43	1	1	58	99	3427	3385	5e-14	67.6
HWI-ST942:56:C4CFMACXX:7:1101:6261:713792	96.30	54	2	0	1	54	107838	107785	1e-20	89.8
HWI-ST942:56:C4CFMACXX:7:1101:6261:713792	100.00	78	0	0	22	99	107785	107708	2e-37	145
HWI-ST942:56:C4CFMACXX:7:1101:9916:426151	98.78	82	1	0	1	82	91849	91930	6e-38	147
HWI-ST942:56:C4CFMACXX:7:1101:9916:426151	89.19	37	4	0	64	100	91930	91894	6e-08	47.3
HWI-ST942:56:C4CFMACXX:7:1101:9916:426152	93.18	44	3	0	1	44	91887	91930	2e-13	65.8
HWI-ST942:56:C4CFMACXX:7:1101:9916:426152	100.00	75	0	0	26	100	91930	91856	1e-35	139
HWI-ST942:56:C4CFMACXX:7:1102:13975:469272	98.75	80	1	0	1	80	71926	71847	8e-37	143
HWI-ST942:56:C4CFMACXX:7:1102:13975:469272	100.00	24	0	0	76	99	71984	71961	2e-07	45.4
HWI-ST942:56:C4CFMACXX:7:1102:14052:177182	100.00	73	0	0	1	73	37964	38036	1e-34	135
HWI-ST942:56:C4CFMACXX:7:1102:14052:177182	100.00	28	0	0	73	100	23424	23397	1e-09	52.8
HWI-ST942:56:C4CFMACXX:7:1102:14578:344012	91.80	61	3	2	1	59	6895	6835	5e-19	84.2
HWI-ST942:56:C4CFMACXX:7:1102:14578:344012	100.00	55	0	0	46	100	6807	6861	1e-24	102
HWI-ST942:56:C4CFMACXX:7:1102:16444:62532	100.00	51	0	0	1	51	67215	67165	2e-22	95.3
HWI-ST942:56:C4CFMACXX:7:1102:16444:62532	95.83	48	2	0	52	99	23449	23496	2e-17	78.7
HWI-ST942:56:C4CFMACXX:7:1102:18215:319271	100.00	34	0	0	1	34	116431	116464	5e-13	63.9
HWI-ST942:56:C4CFMACXX:7:1102:18215:319271	100.00	47	0	0	34	80	116355	116401	3e-20	87.9
HWI-ST942:56:C4CFMACXX:7:1102:18215:319272	100.00	46	0	0	1	46	116400	116355	1e-19	86.1
HWI-ST942:56:C4CFMACXX:7:1102:18215:319272	100.00	34	0	0	46	79	116464	116431	5e-13	63.9
HWI-ST942:56:C4CFMACXX:7:1102:20310:893512	98.57	70	1	0	1	70	67643	67574	3e-31	124
HWI-ST942:56:C4CFMACXX:7:1102:20310:893512	100.00	38	0	0	63	100	114184	114221	4e-15	71.3
HWI-ST942:56:C4CFMACXX:7:1102:3049:365872	100.00	76	0	0	1	76	84155	84080	3e-36	141
HWI-ST942:56:C4CFMACXX:7:1102:3049:365872	100.00	26	0	0	75	100	76967	76992	2e-08	49.1
HWI-ST942:56:C4CFMACXX:7:1102:7029:649592	98.21	56	1	0	1	56	122212	122267	2e-23	99.0
HWI-ST942:56:C4CFMACXX:7:1102:7029:649592	100.00	52	0	0	49	100	122299	122248	6e-23	97.1
HWI-ST942:56:C4CFMACXX:7:1103:11390:593161	100.00	79	0	0	1	79	99268	99190	6e-38	147
HWI-ST942:56:C4CFMACXX:7:1103:11390:593161	100.00	27	0	0	74	100	82126	82100	5e-09	51.0
HWI-ST942:56:C4CFMACXX:7:1103:11390:593162	100.00	81	0	0	1	81	82046	82126	5e-39	150
HWI-ST942:56:C4CFMACXX:7:1103:11390:593162	100.00	25	0	0	76	100	99190	99214	6e-08	47.3
HWI-ST942:56:C4CFMACXX:7:1103:17345:450682	100.00	29	0	0	1	29	78864	78836	3e-10	54.7
HWI-ST942:56:C4CFMACXX:7:1103:17345:450682	98.44	64	1	0	30	93	78839	78902	6e-28	113
HWI-ST942:56:C4CFMACXX:7:1103:6769:168392	98.46	65	1	0	1	65	57200	57264	2e-28	115
HWI-ST942:56:C4CFMACXX:7:1103:6769:168392	100.00	39	0	0	60	98	88586	88548	1e-15	73.1
HWI-ST942:56:C4CFMACXX:7:1103:7610:43302	100.00	86	0	0	1	86	96524	96609	8e-42	159
HWI-ST942:56:C4CFMACXX:7:1103:7610:43302	100.00	22	0	0	79	100	81274	81295	3e-06	41.7
HWI-ST942:56:C4CFMACXX:7:1104:1381:759751	100.00	65	0	0	1	65	125119	125183	4e-30	121
HWI-ST942:56:C4CFMACXX:7:1104:1381:759751	92.86	56	1	2	47	100	121631	121577	2e-17	78.7
HWI-ST942:56:C4CFMACXX:7:1104:19711:753382	97.56	82	1	1	1	81	126549	126630	1e-35	139
HWI-ST942:56:C4CFMACXX:7:1104:19711:753382	100.00	31	0	0	70	100	29071	29041	3e-11	58.4
HWI-ST942:56:C4CFMACXX:7:1104:4736:1002571	100.00	51	0	0	1	51	87901	87851	2e-22	95.3
HWI-ST942:56:C4CFMACXX:7:1104:4736:1002571	100.00	52	0	0	49	100	50279	50228	6e-23	97.1
HWI-ST942:56:C4CFMACXX:7:1104:7978:777751	100.00	25	0	0	1	25	125147	125171	6e-08	47.3
HWI-ST942:56:C4CFMACXX:7:1104:7978:777751	100.00	81	0	0	18	98	87368	87288	5e-39	150
HWI-ST942:56:C4CFMACXX:7:1104:8799:346802	100.00	26	0	0	1	26	104430	104455	2e-08	49.1
HWI-ST942:56:C4CFMACXX:7:1104:8799:346802	100.00	78	0	0	23	100	104480	104403	2e-37	145
HWI-ST942:56:C4CFMACXX:7:1104:9011:376171	100.00	73	0	0	1	73	76655	76727	1e-34	135
HWI-ST942:56:C4CFMACXX:7:1104:9011:376171	100.00	28	0	0	73	100	104179	104152	1e-09	52.8
HWI-ST942:56:C4CFMACXX:7:1104:9414:918532	94.94	79	3	1	1	78	29993	30071	1e-30	122
HWI-ST942:56:C4CFMACXX:7:1104:9414:918532	100.00	44	0	0	57	100	93251	93294	2e-18	82.4
HWI-ST942:56:C4CFMACXX:7:1105:14951:785822	96.61	59	2	0	1	59	5934	5876	2e-23	99.0
HWI-ST942:56:C4CFMACXX:7:1105:14951:785822	100.00	52	0	0	48	99	5845	5896	6e-23	97.1
HWI-ST942:56:C4CFMACXX:7:1105:19416:778621	100.00	36	0	0	1	36	98456	98421	5e-14	67.6
HWI-ST942:56:C4CFMACXX:7:1105:19416:778621	100.00	66	0	0	35	100	98505	98440	1e-30	122
HWI-ST942:56:C4CFMACXX:7:1105:2011:1006701	100.00	30	0	0	1	30	87272	87243	1e-10	56.5
HWI-ST942:56:C4CFMACXX:7:1105:2011:1006701	100.00	70	0	0	31	100	87363	87294	6e-33	130
HWI-ST942:56:C4CFMACXX:7:1105:21330:901982	100.00	81	0	0	1	81	29653	29733	5e-39	150
HWI-ST942:56:C4CFMACXX:7:1105:21330:901982	100.00	23	0	0	78	100	84331	84309	8e-07	43.6
HWI-ST942:56:C4CFMACXX:7:1105:3264:833872	100.00	50	0	0	1	50	90512	90463	8e-22	93.5
HWI-ST942:56:C4CFMACXX:7:1105:3264:833872	100.00	53	0	0	44	96	90413	90465	2e-23	99.0
HWI-ST942:56:C4CFMACXX:7:1105:3556:590272	100.00	24	0	0	1	24	9650	9627	2e-07	45.4
HWI-ST942:56:C4CFMACXX:7:1105:3556:590272	100.00	77	0	0	20	96	9639	9715	7e-37	143
HWI-ST942:56:C4CFMACXX:7:1105:4167:813281	100.00	77	0	0	1	77	89709	89785	8e-37	143
HWI-ST942:56:C4CFMACXX:7:1105:4167:813281	100.00	23	0	0	78	100	9300	9278	8e-07	43.6
HWI-ST942:56:C4CFMACXX:7:1105:4335:957152	96.97	33	1	0	1	33	12369	12337	1e-10	56.5
HWI-ST942:56:C4CFMACXX:7:1105:4335:957152	100.00	73	0	0	25	97	12313	12385	1e-34	135
HWI-ST942:56:C4CFMACXX:7:1106:16059:247762	100.00	29	0	0	1	29	82138	82110	4e-10	54.7
HWI-ST942:56:C4CFMACXX:7:1106:16059:247762	100.00	71	0	0	25	95	82095	82165	2e-33	132
HWI-ST942:56:C4CFMACXX:7:1106:19375:912292	100.00	60	0	0	1	60	84230	84171	2e-27	111
HWI-ST942:56:C4CFMACXX:7:1106:19375:912292	100.00	40	0	0	61	100	1	40	3e-16	75.0
HWI-ST942:56:C4CFMACXX:7:1106:2412:226801	100.00	81	0	0	1	81	87043	86963	5e-39	150
HWI-ST942:56:C4CFMACXX:7:1106:2412:226801	100.00	23	0	0	78	100	45602	45624	8e-07	43.6
HWI-ST942:56:C4CFMACXX:7:1106:2938:866762	100.00	39	0	0	1	39	128175	128213	1e-15	73.1
HWI-ST942:56:C4CFMACXX:7:1106:2938:866762	100.00	59	0	0	37	95	110419	110477	8e-27	110
HWI-ST942:56:C4CFMACXX:7:1106:7749:1002312	96.30	54	1	1	1	53	75559	75506	4e-20	87.9
HWI-ST942:56:C4CFMACXX:7:1106:7749:1002312	100.00	58	0	0	43	100	75476	75533	3e-26	108
HWI-ST942:56:C4CFMACXX:7:1107:11875:734592	100.00	53	0	0	1	53	84833	84885	2e-23	99.0
HWI-ST942:56:C4CFMACXX:7:1107:11875:734592	100.00	40	0	0	60	99	84893	84854	3e-16	75.0
HWI-ST942:56:C4CFMACXX:7:1107:14783:780942	100.00	60	0	0	1	60	86719	86778	2e-27	111
HWI-ST942:56:C4CFMACXX:7:1107:14783:780942	100.00	37	0	0	61	97	28649	28685	1e-14	69.4
HWI-ST942:56:C4CFMACXX:7:1107:17350:372212	90.32	31	2	1	1	31	103303	103274	1e-05	39.9
HWI-ST942:56:C4CFMACXX:7:1107:17350:372212	98.72	78	1	0	23	100	103174	103251	1e-35	139
HWI-ST942:56:C4CFMACXX:7:1107:18279:546142	100.00	55	0	0	1	55	37875	37929	1e-24	102
HWI-ST942:56:C4CFMACXX:7:1107:18279:546142	100.00	53	0	0	47	99	123568	123620	2e-23	99.0
HWI-ST942:56:C4CFMACXX:7:1107:18898:938562	100.00	73	0	0	1	73	95812	95884	1e-34	135
HWI-ST942:56:C4CFMACXX:7:1107:18898:938562	100.00	26	0	0	74	99	24333	24308	2e-08	49.1
HWI-ST942:56:C4CFMACXX:7:1107:6179:737112	100.00	75	0	0	1	75	110225	110299	1e-35	139
HWI-ST942:56:C4CFMACXX:7:1107:6179:737112	100.00	26	0	0	75	100	7084	7059	2e-08	49.1
HWI-ST942:56:C4CFMACXX:7:1107:7953:933051	100.00	27	0	0	1	27	98757	98731	5e-09	51.0
HWI-ST942:56:C4CFMACXX:7:1107:7953:933051	100.00	73	0	0	28	100	98729	98801	1e-34	135
HWI-ST942:56:C4CFMACXX:7:1107:9835:301001	100.00	73	0	0	1	73	106114	106186	1e-34	135
HWI-ST942:56:C4CFMACXX:7:1107:9835:301001	100.00	27	0	0	74	100	94748	94722	5e-09	51.0
HWI-ST942:56:C4CFMACXX:7:1108:10511:601502	97.87	47	1	0	1	47	50181	50227	2e-18	82.4
HWI-ST942:56:C4CFMACXX:7:1108:10511:601502	100.00	60	0	0	39	98	50308	50249	2e-27	111
HWI-ST942:56:C4CFMACXX:7:1108:12439:112792	100.00	60	0	0	1	60	84230	84171	2e-27	111
HWI-ST942:56:C4CFMACXX:7:1108:12439:112792	100.00	40	0	0	61	100	1	40	3e-16	75.0
HWI-ST942:56:C4CFMACXX:7:1108:14589:889902	100.00	35	0	0	1	35	126704	126670	2e-13	65.8
HWI-ST942:56:C4CFMACXX:7:1108:14589:889902	100.00	65	0	0	36	100	126670	126734	4e-30	121
HWI-ST942:56:C4CFMACXX:7:1108:1808:839872	100.00	75	0	0	1	75	64973	64899	1e-35	139
HWI-ST942:56:C4CFMACXX:7:1108:1808:839872	100.00	21	0	0	76	96	110196	110216	1e-05	39.9
HWI-ST942:56:C4CFMACXX:7:1108:8503:213632	100.00	31	0	0	1	31	107164	107134	3e-11	58.4
HWI-ST942:56:C4CFMACXX:7:1108:8503:213632	100.00	72	0	0	28	99	107124	107195	5e-34	134
HWI-ST942:56:C4CFMACXX:7:1108:9708:819271	100.00	27	0	0	1	27	106681	106707	5e-09	51.0
HWI-ST942:56:C4CFMACXX:7:1108:9708:819271	100.00	69	0	0	28	96	106708	106640	2e-32	128
HWI-ST942:56:C4CFMACXX:7:1109:12218:966432	100.00	60	0	0	1	60	22963	23022	2e-27	111
HWI-ST942:56:C4CFMACXX:7:1109:12218:966432	97.50	40	1	0	57	96	23032	22993	1e-14	69.4
HWI-ST942:56:C4CFMACXX:7:1109:20769:508202	100.00	81	0	0	1	81	94590	94670	5e-39	150
HWI-ST942:56:C4CFMACXX:7:1109:20769:508202	100.00	21	0	0	80	100	89858	89878	1e-05	39.9
HWI-ST942:56:C4CFMACXX:7:1109:3330:258922	100.00	27	0	0	1	27	7139	7113	5e-09	51.0
HWI-ST942:56:C4CFMACXX:7:1109:3330:258922	100.00	74	0	0	25	98	6997	7070	4e-35	137
HWI-ST942:56:C4CFMACXX:7:1109:3952:774831	100.00	44	0	0	1	44	119617	119574	2e-18	82.4
HWI-ST942:56:C4CFMACXX:7:1109:3952:774831	98.33	60	1	0	41	100	110731	110790	1e-25	106
HWI-ST942:56:C4CFMACXX:7:1109:4728:387301	100.00	62	0	0	1	62	98276	98337	2e-28	115
HWI-ST942:56:C4CFMACXX:7:1109:4728:387301	100.00	39	0	0	62	100	100716	100678	1e-15	73.1
HWI-ST942:56:C4CFMACXX:7:1110:10123:710912	100.00	24	0	0	1	24	33808	33785	2e-07	45.4
HWI-ST942:56:C4CFMACXX:7:1110:10123:710912	100.00	78	0	0	22	99	33724	33801	2e-37	145
HWI-ST942:56:C4CFMACXX:7:1110:11869:833732	100.00	78	0	0	1	78	62207	62284	2e-37	145
HWI-ST942:56:C4CFMACXX:7:1110:11869:833732	100.00	24	0	0	77	100	90800	90823	2e-07	45.4
HWI-ST942:56:C4CFMACXX:7:1110:14395:527572	96.15	26	1	0	1	26	78081	78056	8e-07	43.6
HWI-ST942:56:C4CFMACXX:7:1110:14395:527572	100.00	80	0	0	20	99	77994	78073	2e-38	148
HWI-ST942:56:C4CFMACXX:7:1110:14443:540222	100.00	30	0	0	1	30	103112	103141	1e-10	56.5
HWI-ST942:56:C4CFMACXX:7:1110:14443:540222	100.00	74	0	0	26	99	103227	103154	4e-35	137
HWI-ST942:56:C4CFMACXX:7:1110:14544:138352	100.00	26	0	0	1	26	16727	16702	2e-08	49.1
HWI-ST942:56:C4CFMACXX:7:1110:14544:138352	100.00	75	0	0	25	99	16702	16776	1e-35	139
HWI-ST942:56:C4CFMACXX:7:1110:18250:162672	98.63	73	1	0	1	73	93907	93835	6e-33	130
HWI-ST942:56:C4CFMACXX:7:1110:18250:162672	100.00	32	0	0	67	98	97720	97689	8e-12	60.2
HWI-ST942:56:C4CFMACXX:7:1110:18559:738162	100.00	21	0	0	1	21	127723	127703	1e-05	39.9
HWI-ST942:56:C4CFMACXX:7:1110:18559:738162	100.00	80	0	0	20	99	127686	127765	2e-38	148
HWI-ST942:56:C4CFMACXX:7:1110:19723:939342	95.56	45	0	1	1	45	38625	38667	4e-15	71.3
HWI-ST942:56:C4CFMACXX:7:1110:19723:939342	100.00	66	0	0	35	100	38824	38759	1e-30	122
HWI-ST942:56:C4CFMACXX:7:1110:21247:890181	100.00	57	0	0	1	57	50498	50442	9e-26	106
HWI-ST942:56:C4CFMACXX:7:1110:21247:890181	100.00	34	0	0	55	88	50513	50480	5e-13	63.9
HWI-ST942:56:C4CFMACXX:7:1110:21247:890182	100.00	33	0	0	1	33	50481	50513	2e-12	62.1
HWI-ST942:56:C4CFMACXX:7:1110:21247:890182	100.00	57	0	0	31	87	50442	50498	9e-26	106
HWI-ST942:56:C4CFMACXX:7:1110:4987:216441	97.50	80	1	1	1	80	93175	93253	1e-34	135
HWI-ST942:56:C4CFMACXX:7:1110:4987:216441	100.00	29	0	0	71	99	45622	45650	4e-10	54.7
HWI-ST942:56:C4CFMACXX:7:1110:4987:216442	100.00	67	0	0	1	67	45688	45622	2e-31	124
HWI-ST942:56:C4CFMACXX:7:1110:4987:216442	93.55	31	1	1	58	88	93253	93224	2e-07	45.4
HWI-ST942:56:C4CFMACXX:7:1110:6340:27312	98.88	89	1	0	1	89	99549	99637	8e-42	159
HWI-ST942:56:C4CFMACXX:7:1110:6340:27312	100.00	21	0	0	80	100	91824	91844	1e-05	39.9
HWI-ST942:56:C4CFMACXX:7:1111:13371:176092	85.88	85	3	8	1	77	94761	94844	2e-18	82.4
HWI-ST942:56:C4CFMACXX:7:1111:13371:176092	100.00	55	0	0	36	90	94830	94776	1e-24	102
HWI-ST942:56:C4CFMACXX:7:1111:15746:1004081	100.00	68	0	0	1	68	69759	69826	8e-32	126
HWI-ST942:56:C4CFMACXX:7:1111:15746:1004081	92.00	50	3	1	51	100	27931	27883	1e-14	69.4
HWI-ST942:56:C4CFMACXX:7:1111:3979:896631	100.00	39	0	0	1	39	117168	117206	1e-15	73.1
HWI-ST942:56:C4CFMACXX:7:1111:3979:896631	100.00	61	0	0	39	99	84642	84582	6e-28	113
HWI-ST942:56:C4CFMACXX:7:1111:7066:280212	100.00	38	0	0	1	38	26461	26498	4e-15	71.3
HWI-ST942:56:C4CFMACXX:7:1111:7066:280212	100.00	65	0	0	35	99	26532	26468	4e-30	121
HWI-ST942:56:C4CFMACXX:7:1111:7768:320902	91.43	35	2	1	1	35	50266	50299	6e-08	47.3
HWI-ST942:56:C4CFMACXX:7:1111:7768:320902	100.00	78	0	0	22	99	86671	86594	2e-37	145
HWI-ST942:56:C4CFMACXX:7:1111:7966:984482	100.00	68	0	0	1	68	89363	89430	8e-32	126
HWI-ST942:56:C4CFMACXX:7:1111:7966:984482	100.00	32	0	0	68	99	379	348	8e-12	60.2
HWI-ST942:56:C4CFMACXX:7:1111:8917:164012	98.00	50	0	1	1	50	125738	125690	1e-19	86.1
HWI-ST942:56:C4CFMACXX:7:1111:8917:164012	100.00	59	0	0	42	100	125671	125729	8e-27	110
HWI-ST942:56:C4CFMACXX:7:1112:15321:586752	100.00	73	0	0	1	73	120188	120260	1e-34	135
HWI-ST942:56:C4CFMACXX:7:1112:15321:586752	100.00	25	0	0	73	97	41980	42004	6e-08	47.3
HWI-ST942:56:C4CFMACXX:7:1112:15711:543361	100.00	77	0	0	1	77	63438	63362	8e-37	143
HWI-ST942:56:C4CFMACXX:7:1112:15711:543361	100.00	24	0	0	77	100	23457	23480	2e-07	45.4
HWI-ST942:56:C4CFMACXX:7:1112:15711:543362	100.00	31	0	0	1	31	23487	23457	3e-11	58.4
HWI-ST942:56:C4CFMACXX:7:1112:15711:543362	100.00	70	0	0	31	100	63362	63431	6e-33	130
HWI-ST942:56:C4CFMACXX:7:1112:16923:217212	100.00	47	0	0	1	47	39937	39983	4e-20	87.9
HWI-ST942:56:C4CFMACXX:7:1112:16923:217212	100.00	57	0	0	42	98	37765	37821	1e-25	106
HWI-ST942:56:C4CFMACXX:7:1112:17079:553852	100.00	70	0	0	1	70	53899	53830	6e-33	130
HWI-ST942:56:C4CFMACXX:7:1112:17079:553852	100.00	30	0	0	71	100	107843	107814	1e-10	56.5
HWI-ST942:56:C4CFMACXX:7:1112:18965:393742	100.00	56	0	0	1	56	78968	78913	4e-25	104
HWI-ST942:56:C4CFMACXX:7:1112:18965:393742	100.00	52	0	0	49	100	78832	78883	6e-23	97.1
HWI-ST942:56:C4CFMACXX:7:1112:19367:327691	100.00	86	0	0	1	86	51216	51131	8e-42	159
HWI-ST942:56:C4CFMACXX:7:1112:19367:327691	100.00	20	0	0	80	99	59479	59460	4e-05	38.1
HWI-ST942:56:C4CFMACXX:7:1112:19367:327692	100.00	64	0	0	1	64	59416	59479	1e-29	119
HWI-ST942:56:C4CFMACXX:7:1112:19367:327692	100.00	43	0	0	58	100	51131	51173	6e-18	80.5
HWI-ST942:56:C4CFMACXX:7:1112:3039:487152	100.00	61	0	0	1	61	124264	124324	6e-28	113
HWI-ST942:56:C4CFMACXX:7:1112:3039:487152	98.11	53	0	1	47	99	55608	55659	3e-21	91.6
HWI-ST942:56:C4CFMACXX:7:1112:6618:344442	100.00	78	0	0	1	78	90885	90808	2e-37	145
HWI-ST942:56:C4CFMACXX:7:1112:6618:344442	100.00	24	0	0	77	100	59820	59797	2e-07	45.4
HWI-ST942:56:C4CFMACXX:7:1112:9946:151642	100.00	38	0	0	1	38	16349	16312	4e-15	71.3
HWI-ST942:56:C4CFMACXX:7:1112:9946:151642	93.94	66	4	0	34	99	16274	16339	5e-24	100
HWI-ST942:56:C4CFMACXX:7:1113:10241:268542	98.59	71	1	0	1	71	77530	77600	8e-32	126
HWI-ST942:56:C4CFMACXX:7:1113:10241:268542	100.00	31	0	0	70	100	5039	5069	3e-11	58.4
HWI-ST942:56:C4CFMACXX:7:1113:12223:898202	100.00	76	0	0	1	76	30959	31034	3e-36	141
HWI-ST942:56:C4CFMACXX:7:1113:12223:898202	97.37	38	1	0	62	99	28268	28305	2e-13	65.8
HWI-ST942:56:C4CFMACXX:7:1113:13226:223622	100.00	77	0	0	1	77	28608	28684	8e-37	143
HWI-ST942:56:C4CFMACXX:7:1113:13226:223622	100.00	35	0	0	66	100	78097	78131	2e-13	65.8
HWI-ST942:56:C4CFMACXX:7:1113:19447:454912	96.15	26	1	0	1	26	117883	117908	8e-07	43.6
HWI-ST942:56:C4CFMACXX:7:1113:19447:454912	100.00	81	0	0	20	100	20529	20609	5e-39	150
HWI-ST942:56:C4CFMACXX:7:1113:4191:603801	100.00	60	0	0	1	60	83063	83122	2e-27	111
HWI-ST942:56:C4CFMACXX:7:1113:4191:603801	100.00	43	0	0	58	100	80544	80502	6e-18	80.5
HWI-ST942:56:C4CFMACXX:7:1114:1880:934852	97.22	36	1	0	1	36	125990	126025	2e-12	62.1
HWI-ST942:56:C4CFMACXX:7:1114:1880:934852	93.85	65	3	1	28	92	126059	125996	6e-23	97.1
HWI-ST942:56:C4CFMACXX:7:1114:19856:526752	100.00	57	0	0	1	57	104974	105030	1e-25	106
HWI-ST942:56:C4CFMACXX:7:1114:19856:526752	89.74	39	4	0	52	90	104684	104722	5e-09	51.0
HWI-ST942:56:C4CFMACXX:7:1114:4750:58192	100.00	78	0	0	1	78	120910	120987	2e-37	145
HWI-ST942:56:C4CFMACXX:7:1114:4750:58192	100.00	34	0	0	67	100	108501	108534	6e-13	63.9
HWI-ST942:56:C4CFMACXX:7:1114:5043:786751	100.00	76	0	0	1	76	92475	92550	3e-36	141
HWI-ST942:56:C4CFMACXX:7:1114:5043:786751	100.00	26	0	0	75	100	62161	62186	2e-08	49.1
HWI-ST942:56:C4CFMACXX:7:1114:5069:31252	100.00	70	0	0	1	70	22791	22722	6e-33	130
HWI-ST942:56:C4CFMACXX:7:1114:5069:31252	100.00	32	0	0	69	100	7811	7842	8e-12	60.2
HWI-ST942:56:C4CFMACXX:7:1114:8466:264962	100.00	24	0	0	1	24	85832	85855	2e-07	45.4
HWI-ST942:56:C4CFMACXX:7:1114:8466:264962	100.00	75	0	0	25	99	85856	85782	1e-35	139
HWI-ST942:56:C4CFMACXX:7:1115:10940:620372	97.37	38	1	0	1	38	110473	110510	2e-13	65.8
HWI-ST942:56:C4CFMACXX:7:1115:10940:620372	98.55	69	1	0	32	100	110525	110457	1e-30	122
HWI-ST942:56:C4CFMACXX:7:1115:14309:811342	95.12	41	2	0	1	41	107367	107407	2e-13	65.8
HWI-ST942:56:C4CFMACXX:7:1115:14309:811342	100.00	65	0	0	32	96	107455	107391	3e-30	121
HWI-ST942:56:C4CFMACXX:7:1115:15043:865272	100.00	75	0	0	1	75	108542	108468	1e-35	139
HWI-ST942:56:C4CFMACXX:7:1115:15043:865272	100.00	27	0	0	74	100	106612	106586	5e-09	51.0
HWI-ST942:56:C4CFMACXX:7:1115:17595:358401	100.00	65	0	0	1	65	30250	30314	4e-30	121
HWI-ST942:56:C4CFMACXX:7:1115:17595:358401	100.00	34	0	0	66	99	44823	44790	6e-13	63.9
HWI-ST942:56:C4CFMACXX:7:1115:17802:626912	100.00	29	0	0	1	29	92370	92398	4e-10	54.7
HWI-ST942:56:C4CFMACXX:7:1115:17802:626912	100.00	72	0	0	28	99	92378	92307	5e-34	134
HWI-ST942:56:C4CFMACXX:7:1115:3357:759011	100.00	71	0	0	1	71	107930	108000	2e-33	132
HWI-ST942:56:C4CFMACXX:7:1115:3357:759011	94.74	38	1	1	63	100	101738	101774	3e-11	58.4
HWI-ST942:56:C4CFMACXX:7:1115:3747:21612	98.63	73	1	0	1	73	52154	52226	6e-33	130
HWI-ST942:56:C4CFMACXX:7:1115:3747:21612	100.00	38	0	0	63	100	84371	84408	4e-15	71.3
HWI-ST942:56:C4CFMACXX:7:1115:8310:457561	97.83	46	0	1	1	45	109399	109444	2e-17	78.7
HWI-ST942:56:C4CFMACXX:7:1115:8310:457561	98.41	63	0	1	38	100	109356	109417	8e-27	110
HWI-ST942:56:C4CFMACXX:7:1116:10952:368922	100.00	27	0	0	1	27	29527	29553	5e-09	51.0
HWI-ST942:56:C4CFMACXX:7:1116:10952:368922	100.00	72	0	0	28	99	29556	29485	5e-34	134
HWI-ST942:56:C4CFMACXX:7:1201:11678:828962	100.00	24	0	0	1	24	98742	98765	2e-07	45.4
HWI-ST942:56:C4CFMACXX:7:1201:11678:828962	100.00	87	0	0	13	99	98765	98679	2e-42	161
HWI-ST942:56:C4CFMACXX:7:1201:15889:418382	100.00	77	0	0	1	77	85267	85191	8e-37	143
HWI-ST942:56:C4CFMACXX:7:1201:15889:418382	93.75	32	2	0	69	100	12811	12780	2e-08	49.1
HWI-ST942:56:C4CFMACXX:7:1201:17661:733952	100.00	81	0	0	1	81	91896	91816	5e-39	150
HWI-ST942:56:C4CFMACXX:7:1201:17661:733952	100.00	21	0	0	80	100	124228	124208	1e-05	39.9
HWI-ST942:56:C4CFMACXX:7:1201:6633:334042	100.00	31	0	0	1	31	119528	119498	3e-11	58.4
HWI-ST942:56:C4CFMACXX:7:1201:6633:334042	100.00	73	0	0	28	100	119423	119495	1e-34	135
HWI-ST942:56:C4CFMACXX:7:1201:6722:421622	98.68	76	0	1	1	75	48564	48489	5e-34	134
HWI-ST942:56:C4CFMACXX:7:1201:6722:421622	100.00	31	0	0	70	100	51995	52025	3e-11	58.4
HWI-ST942:56:C4CFMACXX:7:1201:7551:807661	100.00	39	0	0	1	39	84904	84942	1e-15	73.1
HWI-ST942:56:C4CFMACXX:7:1201:7551:807661	100.00	59	0	0	40	98	92796	92854	8e-27	110
HWI-ST942:56:C4CFMACXX:7:1201:8540:503421	97.56	82	1	1	1	82	94885	94965	1e-35	139
HWI-ST942:56:C4CFMACXX:7:1201:8540:503421	100.00	25	0	0	76	100	103819	103843	6e-08	47.3
HWI-ST942:56:C4CFMACXX:7:1202:12586:737492	89.58	48	5	0	1	48	112258	112211	2e-12	62.1
HWI-ST942:56:C4CFMACXX:7:1202:12586:737492	100.00	74	0	0	26	99	112211	112284	4e-35	137
HWI-ST942:56:C4CFMACXX:7:1202:1351:1002452	98.82	85	1	0	1	85	50045	49961	1e-39	152
HWI-ST942:56:C4CFMACXX:7:1202:1351:1002452	93.75	32	0	2	68	99	110409	110438	6e-08	47.3
HWI-ST942:56:C4CFMACXX:7:1202:14322:473582	100.00	57	0	0	1	57	111691	111747	1e-25	106
HWI-ST942:56:C4CFMACXX:7:1202:14322:473582	100.00	49	0	0	52	100	32891	32843	3e-21	91.6
HWI-ST942:56:C4CFMACXX:7:1202:2963:437102	100.00	34	0	0	1	34	86079	86112	6e-13	63.9
HWI-ST942:56:C4CFMACXX:7:1202:2963:437102	100.00	63	0	0	37	99	86151	86089	5e-29	117
HWI-ST942:56:C4CFMACXX:7:1202:3010:605722	98.68	76	1	0	1	76	107167	107242	1e-34	135
HWI-ST942:56:C4CFMACXX:7:1202:3010:605722	100.00	31	0	0	70	100	21751	21781	3e-11	58.4
HWI-ST942:56:C4CFMACXX:7:1202:3468:754412	100.00	33	0	0	1	33	123364	123332	2e-12	62.1
HWI-ST942:56:C4CFMACXX:7:1202:3468:754412	100.00	71	0	0	30	100	123293	123363	2e-33	132
HWI-ST942:56:C4CFMACXX:7:1202:4808:1005672	100.00	79	0	0	1	79	29082	29160	6e-38	147
HWI-ST942:56:C4CFMACXX:7:1202:4808:1005672	100.00	24	0	0	77	100	559	536	2e-07	45.4
HWI-ST942:56:C4CFMACXX:7:1202:4938:683682	96.10	77	2	1	1	76	74096	74020	3e-31	124
HWI-ST942:56:C4CFMACXX:7:1202:4938:683682	100.00	31	0	0	66	96	74000	74030	3e-11	58.4
HWI-ST942:56:C4CFMACXX:7:1202:6385:965842	95.77	71	3	0	1	71	15263	15333	2e-28	115
HWI-ST942:56:C4CFMACXX:7:1202:6385:965842	100.00	40	0	0	61	100	106159	106198	3e-16	75.0
HWI-ST942:56:C4CFMACXX:7:1203:15296:881272	93.22	59	2	2	1	58	96351	96408	1e-19	86.1
HWI-ST942:56:C4CFMACXX:7:1203:15296:881272	98.44	64	1	0	36	99	96408	96345	6e-28	113
HWI-ST942:56:C4CFMACXX:7:1203:16684:835511	100.00	65	0	0	1	65	115778	115714	4e-30	121
HWI-ST942:56:C4CFMACXX:7:1203:16684:835511	100.00	36	0	0	65	100	115571	115536	5e-14	67.6
HWI-ST942:56:C4CFMACXX:7:1203:16684:835512	100.00	57	0	0	1	57	115515	115571	1e-25	106
HWI-ST942:56:C4CFMACXX:7:1203:16684:835512	100.00	44	0	0	57	100	115714	115757	2e-18	82.4
HWI-ST942:56:C4CFMACXX:7:1203:17637:883482	97.67	43	1	0	1	43	97170	97128	3e-16	75.0
HWI-ST942:56:C4CFMACXX:7:1203:17637:883482	100.00	65	0	0	36	100	97114	97178	4e-30	121
HWI-ST942:56:C4CFMACXX:7:1203:18979:643182	100.00	23	0	0	1	23	26418	26440	8e-07	43.6
HWI-ST942:56:C4CFMACXX:7:1203:18979:643182	100.00	77	0	0	20	96	26452	26376	7e-37	143
HWI-ST942:56:C4CFMACXX:7:1203:20107:206252	89.36	47	3	2	1	45	62754	62800	3e-11	58.4
HWI-ST942:56:C4CFMACXX:7:1203:20107:206252	100.00	72	0	0	25	96	62828	62757	4e-34	134
HWI-ST942:56:C4CFMACXX:7:1203:2503:633932	89.66	58	6	0	1	58	125014	125071	3e-16	75.0
HWI-ST942:56:C4CFMACXX:7:1203:2503:633932	100.00	68	0	0	32	99	125073	125006	8e-32	126
HWI-ST942:56:C4CFMACXX:7:1203:4200:305831	100.00	81	0	0	1	81	29994	30074	5e-39	150
HWI-ST942:56:C4CFMACXX:7:1203:4200:305831	100.00	21	0	0	80	100	115510	115490	1e-05	39.9
HWI-ST942:56:C4CFMACXX:7:1204:11896:287582	96.55	29	1	0	1	29	26203	26175	2e-08	49.1
HWI-ST942:56:C4CFMACXX:7:1204:11896:287582	100.00	85	0	0	15	99	26175	26259	3e-41	158
HWI-ST942:56:C4CFMACXX:7:1204:13407:607502	100.00	48	0	0	1	48	98713	98760	1e-20	89.8
HWI-ST942:56:C4CFMACXX:7:1204:13407:607502	100.00	53	0	0	47	99	108998	109050	2e-23	99.0
HWI-ST942:56:C4CFMACXX:7:1204:14320:469832	100.00	24	0	0	1	24	101444	101467	2e-07	45.4
HWI-ST942:56:C4CFMACXX:7:1204:14320:469832	100.00	81	0	0	20	100	101486	101406	5e-39	150
HWI-ST942:56:C4CFMACXX:7:1204:14577:60682	100.00	42	0	0	1	42	95344	95303	2e-17	78.7
HWI-ST942:56:C4CFMACXX:7:1204:14577:60682	100.00	57	0	0	43	99	95302	95358	1e-25	106
HWI-ST942:56:C4CFMACXX:7:1204:15668:123662	100.00	65	0	0	1	65	21421	21357	4e-30	121
HWI-ST942:56:C4CFMACXX:7:1204:15668:123662	100.00	35	0	0	65	99	115933	115967	2e-13	65.8
HWI-ST942:56:C4CFMACXX:7:1204:1577:432612	100.00	24	0	0	1	24	31330	31353	2e-07	45.4
HWI-ST942:56:C4CFMACXX:7:1204:1577:432612	100.00	76	0	0	25	100	78180	78255	3e-36	141
HWI-ST942:56:C4CFMACXX:7:1204:9055:67311	100.00	78	0	0	1	78	25776	25853	2e-37	145
HWI-ST942:56:C4CFMACXX:7:1204:9055:67311	100.00	21	0	0	78	98	25851	25831	1e-05	39.9
HWI-ST942:56:C4CFMACXX:7:1204:9055:67312	100.00	43	0	0	1	43	25809	25851	6e-18	80.5
HWI-ST942:56:C4CFMACXX:7:1204:9055:67312	100.00	57	0	0	43	99	25853	25797	1e-25	106
HWI-ST942:56:C4CFMACXX:7:1205:17530:924871	100.00	54	0	0	1	54	99295	99242	5e-24	100
HWI-ST942:56:C4CFMACXX:7:1205:17530:924871	100.00	45	0	0	55	99	39900	39856	5e-19	84.2
HWI-ST942:56:C4CFMACXX:7:1205:18598:681342	100.00	77	0	0	1	77	69718	69642	8e-37	143
HWI-ST942:56:C4CFMACXX:7:1205:18598:681342	100.00	31	0	0	70	100	61749	61719	3e-11	58.4
HWI-ST942:56:C4CFMACXX:7:1205:19476:706692	100.00	30	0	0	1	30	86773	86802	1e-10	56.5
HWI-ST942:56:C4CFMACXX:7:1205:19476:706692	100.00	77	0	0	24	100	86848	86772	8e-37	143
HWI-ST942:56:C4CFMACXX:7:1205:21246:287731	100.00	79	0	0	1	79	99414	99492	6e-38	147
HWI-ST942:56:C4CFMACXX:7:1205:21246:287731	100.00	20	0	0	78	97	89192	89211	4e-05	38.1
HWI-ST942:56:C4CFMACXX:7:1205:6160:769121	100.00	33	0	0	1	33	57515	57547	2e-12	62.1
HWI-ST942:56:C4CFMACXX:7:1205:6160:769121	98.44	64	1	0	34	97	57547	57484	6e-28	113
HWI-ST942:56:C4CFMACXX:7:1205:9676:165002	100.00	56	0	0	1	56	126554	126609	4e-25	104
HWI-ST942:56:C4CFMACXX:7:1205:9676:165002	100.00	52	0	0	49	100	77880	77931	6e-23	97.1
HWI-ST942:56:C4CFMACXX:7:1206:10062:302211	100.00	67	0	0	1	67	89489	89423	3e-31	124
HWI-ST942:56:C4CFMACXX:7:1206:10062:302211	100.00	33	0	0	67	99	16472	16440	2e-12	62.1
HWI-ST942:56:C4CFMACXX:7:1206:10664:234642	100.00	64	0	0	1	64	77905	77968	1e-29	119
HWI-ST942:56:C4CFMACXX:7:1206:10664:234642	100.00	47	0	0	54	100	71631	71677	4e-20	87.9
HWI-ST942:56:C4CFMACXX:7:1206:13011:66632	100.00	82	0	0	1	82	113223	113304	1e-39	152
HWI-ST942:56:C4CFMACXX:7:1206:13011:66632	100.00	20	0	0	81	100	42245	42264	4e-05	38.1
HWI-ST942:56:C4CFMACXX:7:1206:17288:605592	98.28	58	1	0	1	58	55866	55923	1e-24	102
HWI-ST942:56:C4CFMACXX:7:1206:17288:605592	100.00	52	0	0	48	99	33201	33252	6e-23	97.1
HWI-ST942:56:C4CFMACXX:7:1206:3559:662122	98.44	64	1	0	1	64	29113	29176	6e-28	113
HWI-ST942:56:C4CFMACXX:7:1206:3559:662122	100.00	47	0	0	54	100	29192	29146	4e-20	87.9
HWI-ST942:56:C4CFMACXX:7:1206:4109:879892	93.75	32	2	0	1	32	94966	94935	2e-08	49.1
HWI-ST942:56:C4CFMACXX:7:1206:4109:879892	100.00	84	0	0	17	100	94935	95018	1e-40	156
HWI-ST942:56:C4CFMACXX:7:1206:6995:647592	97.50	40	1	0	1	40	93496	93535	1e-14	69.4
HWI-ST942:56:C4CFMACXX:7:1206:6995:647592	100.00	66	0	0	35	100	93562	93497	1e-30	122
HWI-ST942:56:C4CFMACXX:7:1206:7054:206562	95.92	49	2	0	1	49	94983	94935	6e-18	80.5
HWI-ST942:56:C4CFMACXX:7:1206:7054:206562	98.51	67	1	0	34	100	94935	95001	1e-29	119
HWI-ST942:56:C4CFMACXX:7:1206:9079:245742	100.00	72	0	0	1	72	124975	125046	5e-34	134
HWI-ST942:56:C4CFMACXX:7:1206:9079:245742	100.00	29	0	0	71	99	101755	101783	4e-10	54.7
HWI-ST942:56:C4CFMACXX:7:1207:17151:592671	100.00	81	0	0	1	81	73767	73847	5e-39	150
HWI-ST942:56:C4CFMACXX:7:1207:17151:592671	100.00	21	0	0	80	100	120158	120178	1e-05	39.9
HWI-ST942:56:C4CFMACXX:7:1207:1894:718271	100.00	79	0	0	1	79	66017	66095	6e-38	147
HWI-ST942:56:C4CFMACXX:7:1207:1894:718271	100.00	24	0	0	77	100	116275	116298	2e-07	45.4
HWI-ST942:56:C4CFMACXX:7:1207:1900:791682	100.00	39	0	0	1	39	96146	96108	1e-15	73.1
HWI-ST942:56:C4CFMACXX:7:1207:1900:791682	100.00	67	0	0	34	100	96059	96125	3e-31	124
HWI-ST942:56:C4CFMACXX:7:1207:3178:966052	100.00	39	0	0	1	39	11964	11926	1e-15	73.1
HWI-ST942:56:C4CFMACXX:7:1207:3178:966052	100.00	65	0	0	36	100	11897	11961	4e-30	121
HWI-ST942:56:C4CFMACXX:7:1207:6885:209302	100.00	30	0	0	1	30	101459	101430	1e-10	56.5
HWI-ST942:56:C4CFMACXX:7:1207:6885:209302	100.00	76	0	0	25	100	101415	101490	3e-36	141
HWI-ST942:56:C4CFMACXX:7:1207:7226:394531	100.00	73	0	0	1	73	38209	38281	1e-34	135
HWI-ST942:56:C4CFMACXX:7:1207:7226:394531	100.00	30	0	0	71	100	54858	54887	1e-10	56.5
HWI-ST942:56:C4CFMACXX:7:1207:9845:959862	100.00	38	0	0	1	38	106941	106904	4e-15	71.3
HWI-ST942:56:C4CFMACXX:7:1207:9845:959862	100.00	59	0	0	38	96	76766	76708	8e-27	110
HWI-ST942:56:C4CFMACXX:7:1208:11310:865912	100.00	78	0	0	1	78	100375	100298	2e-37	145
HWI-ST942:56:C4CFMACXX:7:1208:11310:865912	100.00	27	0	0	73	99	94021	94047	5e-09	51.0
HWI-ST942:56:C4CFMACXX:7:1208:12231:730312	97.14	35	1	0	1	35	33020	32986	8e-12	60.2
HWI-ST942:56:C4CFMACXX:7:1208:12231:730312	100.00	67	0	0	32	98	32943	33009	3e-31	124
HWI-ST942:56:C4CFMACXX:7:1208:18166:384272	100.00	29	0	0	1	29	16989	17017	4e-10	54.7
HWI-ST942:56:C4CFMACXX:7:1208:18166:384272	100.00	76	0	0	25	100	17029	16954	3e-36	141
HWI-ST942:56:C4CFMACXX:7:1208:20975:224901	97.06	34	1	0	1	34	1874	1841	3e-11	58.4
HWI-ST942:56:C4CFMACXX:7:1208:20975:224901	97.59	83	1	1	12	93	1841	1923	3e-36	141
HWI-ST942:56:C4CFMACXX:7:1208:6113:764121	98.41	63	1	0	1	63	51906	51844	2e-27	111
HWI-ST942:56:C4CFMACXX:7:1208:6113:764121	100.00	43	0	0	58	100	109482	109440	6e-18	80.5
HWI-ST942:56:C4CFMACXX:7:1208:7494:299032	100.00	24	0	0	1	24	116444	116421	2e-07	45.4
HWI-ST942:56:C4CFMACXX:7:1208:7494:299032	100.00	79	0	0	22	100	116396	116474	6e-38	147
HWI-ST942:56:C4CFMACXX:7:1208:8333:172022	100.00	32	0	0	1	32	4134	4165	8e-12	60.2
HWI-ST942:56:C4CFMACXX:7:1208:8333:172022	100.00	73	0	0	28	100	4208	4136	1e-34	135
HWI-ST942:56:C4CFMACXX:7:1208:9396:526932	100.00	32	0	0	1	32	60150	60119	8e-12	60.2
HWI-ST942:56:C4CFMACXX:7:1208:9396:526932	100.00	74	0	0	27	100	60104	60177	4e-35	137
HWI-ST942:56:C4CFMACXX:7:1209:12666:297691	98.55	69	1	0	1	69	117059	116991	1e-30	122
HWI-ST942:56:C4CFMACXX:7:1209:12666:297691	100.00	29	0	0	70	98	123884	123912	4e-10	54.7
HWI-ST942:56:C4CFMACXX:7:1209:12737:623482	100.00	57	0	0	1	57	56184	56128	1e-25	106
HWI-ST942:56:C4CFMACXX:7:1209:12737:623482	100.00	45	0	0	56	100	111092	111048	5e-19	84.2
HWI-ST942:56:C4CFMACXX:7:1209:13746:339392	100.00	79	0	0	1	79	119371	119293	6e-38	147
HWI-ST942:56:C4CFMACXX:7:1209:13746:339392	100.00	28	0	0	73	100	110338	110311	1e-09	52.8
HWI-ST942:56:C4CFMACXX:7:1209:15001:571352	96.15	26	1	0	1	26	76274	76299	8e-07	43.6
HWI-ST942:56:C4CFMACXX:7:1209:15001:571352	100.00	83	0	0	18	100	76352	76270	4e-40	154
HWI-ST942:56:C4CFMACXX:7:1209:15683:898892	93.33	30	2	0	1	30	76851	76880	2e-07	45.4
HWI-ST942:56:C4CFMACXX:7:1209:15683:898892	100.00	78	0	0	19	96	76912	76835	2e-37	145
HWI-ST942:56:C4CFMACXX:7:1209:4192:298002	87.93	58	5	2	1	56	117723	117666	5e-14	67.6
HWI-ST942:56:C4CFMACXX:7:1209:4192:298002	95.52	67	1	2	22	86	117666	117732	1e-25	106
HWI-ST942:56:C4CFMACXX:7:1210:13211:449312	100.00	82	0	0	1	82	106817	106736	1e-39	152
HWI-ST942:56:C4CFMACXX:7:1210:13211:449312	96.55	29	0	1	72	100	110487	110460	6e-08	47.3
HWI-ST942:56:C4CFMACXX:7:1210:13506:732871	100.00	77	0	0	1	77	123316	123240	8e-37	143
HWI-ST942:56:C4CFMACXX:7:1210:13506:732871	100.00	25	0	0	76	100	2913	2889	6e-08	47.3
HWI-ST942:56:C4CFMACXX:7:1210:14913:213322	98.39	62	1	0	1	62	28233	28294	8e-27	110
HWI-ST942:56:C4CFMACXX:7:1210:14913:213322	100.00	58	0	0	43	100	17800	17743	3e-26	108
HWI-ST942:56:C4CFMACXX:7:1210:15577:533172	98.15	54	1	0	1	54	98367	98314	2e-22	95.3
HWI-ST942:56:C4CFMACXX:7:1210:15577:533172	100.00	50	0	0	50	99	98430	98381	8e-22	93.5
HWI-ST942:56:C4CFMACXX:7:1210:19389:542722	98.70	77	1	0	1	77	21821	21897	4e-35	137
HWI-ST942:56:C4CFMACXX:7:1210:19389:542722	100.00	26	0	0	75	100	111014	111039	2e-08	49.1
HWI-ST942:56:C4CFMACXX:7:1210:4198:452262	100.00	41	0	0	1	41	125299	125259	8e-17	76.8
HWI-ST942:56:C4CFMACXX:7:1210:4198:452262	100.00	71	0	0	30	100	125259	125329	2e-33	132
HWI-ST942:56:C4CFMACXX:7:1210:7013:493742	100.00	28	0	0	1	28	101917	101944	1e-09	52.8
HWI-ST942:56:C4CFMACXX:7:1210:7013:493742	97.33	75	2	0	22	96	102043	101969	2e-32	128
HWI-ST942:56:C4CFMACXX:7:1210:7021:750172	100.00	77	0	0	1	77	122442	122366	8e-37	143
HWI-ST942:56:C4CFMACXX:7:1210:7021:750172	100.00	30	0	0	71	100	112683	112712	1e-10	56.5
HWI-ST942:56:C4CFMACXX:7:1210:7233:505411	100.00	92	0	0	1	92	115088	115179	4e-45	171
HWI-ST942:56:C4CFMACXX:7:1210:7233:505411	90.32	31	1	2	72	100	114630	114660	1e-05	39.9
HWI-ST942:56:C4CFMACXX:7:1211:18554:605052	100.00	29	0	0	1	29	67473	67445	4e-10	54.7
HWI-ST942:56:C4CFMACXX:7:1211:18554:605052	100.00	81	0	0	20	100	67403	67483	5e-39	150
HWI-ST942:56:C4CFMACXX:7:1211:18685:657741	100.00	64	0	0	1	64	18619	18556	1e-29	119
HWI-ST942:56:C4CFMACXX:7:1211:18685:657741	100.00	36	0	0	65	100	57073	57108	5e-14	67.6
HWI-ST942:56:C4CFMACXX:7:1211:6694:351272	98.65	74	1	0	1	74	80292	80365	2e-33	132
HWI-ST942:56:C4CFMACXX:7:1211:6694:351272	100.00	31	0	0	63	93	44280	44250	3e-11	58.4
HWI-ST942:56:C4CFMACXX:7:1211:8407:639972	90.59	85	5	3	1	85	99318	99237	8e-27	110
HWI-ST942:56:C4CFMACXX:7:1211:8407:639972	98.04	51	0	1	51	100	30701	30651	4e-20	87.9
HWI-ST942:56:C4CFMACXX:7:1212:13084:383991	89.83	59	5	1	1	58	115998	116056	3e-16	75.0
HWI-ST942:56:C4CFMACXX:7:1212:13084:383991	100.00	63	0	0	38	100	115909	115971	5e-29	117
HWI-ST942:56:C4CFMACXX:7:1212:15837:959562	100.00	39	0	0	1	39	22099	22137	1e-15	73.1
HWI-ST942:56:C4CFMACXX:7:1212:15837:959562	100.00	59	0	0	40	98	13137	13195	8e-27	110
HWI-ST942:56:C4CFMACXX:7:1212:16752:29042	97.67	43	0	1	1	42	57769	57811	1e-15	73.1
HWI-ST942:56:C4CFMACXX:7:1212:16752:29042	100.00	67	0	0	34	100	57835	57769	3e-31	124
HWI-ST942:56:C4CFMACXX:7:1212:17707:205271	96.97	66	1	1	1	65	82441	82376	8e-27	110
HWI-ST942:56:C4CFMACXX:7:1212:17707:205271	100.00	45	0	0	56	100	82461	82417	5e-19	84.2
HWI-ST942:56:C4CFMACXX:7:1212:17707:205272	100.00	52	0	0	1	52	82410	82461	6e-23	97.1
HWI-ST942:56:C4CFMACXX:7:1212:17707:205272	96.55	58	1	1	43	99	82376	82433	2e-22	95.3
HWI-ST942:56:C4CFMACXX:7:1212:1876:737462	100.00	53	0	0	1	53	37115	37063	2e-23	99.0
HWI-ST942:56:C4CFMACXX:7:1212:1876:737462	100.00	53	0	0	48	100	37036	37088	2e-23	99.0
HWI-ST942:56:C4CFMACXX:7:1212:21339:542072	95.12	41	2	0	1	41	123642	123602	2e-13	65.8
HWI-ST942:56:C4CFMACXX:7:1212:21339:542072	97.67	86	2	0	14	99	123602	123687	2e-38	148
HWI-ST942:56:C4CFMACXX:7:1212:3519:767252	96.55	29	0	1	1	29	49833	49860	6e-08	47.3
HWI-ST942:56:C4CFMACXX:7:1212:3519:767252	100.00	81	0	0	20	100	49939	49859	5e-39	150
HWI-ST942:56:C4CFMACXX:7:1212:4026:473872	98.25	57	1	0	1	57	87391	87335	5e-24	100
HWI-ST942:56:C4CFMACXX:7:1212:4026:473872	100.00	53	0	0	46	98	93813	93865	2e-23	99.0
HWI-ST942:56:C4CFMACXX:7:1213:18212:702912	100.00	67	0	0	1	67	106973	106907	3e-31	124
HWI-ST942:56:C4CFMACXX:7:1213:18212:702912	100.00	33	0	0	67	99	38999	39031	2e-12	62.1
HWI-ST942:56:C4CFMACXX:7:1213:20795:127962	90.74	54	3	2	1	54	4107	4056	4e-15	71.3
HWI-ST942:56:C4CFMACXX:7:1213:20795:127962	100.00	68	0	0	33	100	4046	4113	8e-32	126
HWI-ST942:56:C4CFMACXX:7:1213:2474:770342	98.25	57	1	0	1	57	897	953	5e-24	100
HWI-ST942:56:C4CFMACXX:7:1213:2474:770342	100.00	51	0	0	50	100	127456	127406	2e-22	95.3
HWI-ST942:56:C4CFMACXX:7:1213:5474:259752	100.00	70	0	0	1	70	44717	44786	6e-33	130
HWI-ST942:56:C4CFMACXX:7:1213:5474:259752	100.00	32	0	0	69	100	49637	49606	8e-12	60.2
HWI-ST942:56:C4CFMACXX:7:1213:5925:76122	100.00	48	0	0	1	48	50759	50806	1e-20	89.8
HWI-ST942:56:C4CFMACXX:7:1213:5925:76122	100.00	49	0	0	48	96	50703	50751	3e-21	91.6
HWI-ST942:56:C4CFMACXX:7:1213:5955:987612	100.00	44	0	0	1	44	93204	93161	2e-18	82.4
HWI-ST942:56:C4CFMACXX:7:1213:5955:987612	100.00	61	0	0	39	99	90825	90885	6e-28	113
HWI-ST942:56:C4CFMACXX:7:1213:7418:29782	100.00	73	0	0	1	73	52532	52460	1e-34	135
HWI-ST942:56:C4CFMACXX:7:1213:7418:29782	100.00	28	0	0	73	100	1341	1368	1e-09	52.8
HWI-ST942:56:C4CFMACXX:7:1214:16089:626732	100.00	52	0	0	1	52	21661	21712	6e-23	97.1
HWI-ST942:56:C4CFMACXX:7:1214:16089:626732	100.00	48	0	0	53	100	29221	29174	1e-20	89.8
HWI-ST942:56:C4CFMACXX:7:1214:17336:438312	98.15	54	1	0	1	54	98367	98314	2e-22	95.3
HWI-ST942:56:C4CFMACXX:7:1214:17336:438312	100.00	50	0	0	50	99	98430	98381	8e-22	93.5
HWI-ST942:56:C4CFMACXX:7:1215:14238:361042	98.39	62	1	0	1	62	465	526	8e-27	110
HWI-ST942:56:C4CFMACXX:7:1215:14238:361042	100.00	42	0	0	55	96	564	523	2e-17	78.7
HWI-ST942:56:C4CFMACXX:7:1215:14716:465551	100.00	45	0	0	1	45	100183	100227	5e-19	84.2
HWI-ST942:56:C4CFMACXX:7:1215:14716:465551	98.39	62	1	0	38	99	12672	12611	8e-27	110
HWI-ST942:56:C4CFMACXX:7:1215:15564:537961	100.00	65	0	0	1	65	81188	81252	4e-30	121
HWI-ST942:56:C4CFMACXX:7:1215:15564:537961	100.00	33	0	0	66	98	78610	78642	2e-12	62.1
HWI-ST942:56:C4CFMACXX:7:1215:16262:292372	89.74	39	4	0	1	39	46670	46632	5e-09	51.0
HWI-ST942:56:C4CFMACXX:7:1215:16262:292372	100.00	78	0	0	22	99	46626	46703	2e-37	145
HWI-ST942:56:C4CFMACXX:7:1215:4286:758582	98.33	60	1	0	1	60	28739	28798	1e-25	106
HWI-ST942:56:C4CFMACXX:7:1215:4286:758582	100.00	51	0	0	50	100	26052	26002	2e-22	95.3
HWI-ST942:56:C4CFMACXX:7:1215:4629:636852	87.72	57	7	0	1	57	300	244	5e-14	67.6
HWI-ST942:56:C4CFMACXX:7:1215:4629:636852	100.00	68	0	0	33	100	243	310	8e-32	126
HWI-ST942:56:C4CFMACXX:7:1215:7624:953622	97.30	37	1	0	1	37	98637	98673	6e-13	63.9
HWI-ST942:56:C4CFMACXX:7:1215:7624:953622	100.00	65	0	0	31	95	98748	98684	3e-30	121
HWI-ST942:56:C4CFMACXX:7:1216:1149:660231	98.77	81	1	0	1	81	55930	56010	2e-37	145
HWI-ST942:56:C4CFMACXX:7:1216:1149:660231	100.00	23	0	0	78	100	90868	90890	8e-07	43.6
HWI-ST942:56:C4CFMACXX:7:1216:15530:836752	100.00	66	0	0	1	66	113624	113559	1e-30	122
HWI-ST942:56:C4CFMACXX:7:1216:15530:836752	100.00	33	0	0	67	99	5679	5647	2e-12	62.1
HWI-ST942:56:C4CFMACXX:7:1216:16472:705411	100.00	73	0	0	1	73	78785	78713	1e-34	135
HWI-ST942:56:C4CFMACXX:7:1216:16472:705411	100.00	26	0	0	74	99	9073	9048	2e-08	49.1
HWI-ST942:56:C4CFMACXX:7:1216:19730:901852	96.05	76	3	0	1	76	97004	97079	3e-31	124
HWI-ST942:56:C4CFMACXX:7:1216:19730:901852	100.00	23	0	0	77	99	97115	97137	8e-07	43.6
HWI-ST942:56:C4CFMACXX:7:1301:13869:765212	97.06	68	2	0	1	68	45645	45712	2e-28	115
HWI-ST942:56:C4CFMACXX:7:1301:13869:765212	100.00	47	0	0	52	98	51068	51114	4e-20	87.9
HWI-ST942:56:C4CFMACXX:7:1301:20292:90972	100.00	73	0	0	1	73	111663	111591	1e-34	135
HWI-ST942:56:C4CFMACXX:7:1301:20292:90972	100.00	28	0	0	73	100	99744	99771	1e-09	52.8
HWI-ST942:56:C4CFMACXX:7:1301:21001:881732	100.00	74	0	0	1	74	85217	85290	4e-35	137
HWI-ST942:56:C4CFMACXX:7:1301:21001:881732	100.00	30	0	0	70	99	86760	86789	1e-10	56.5
HWI-ST942:56:C4CFMACXX:7:1301:8173:784401	100.00	74	0	0	1	74	91780	91707	4e-35	137
HWI-ST942:56:C4CFMACXX:7:1301:8173:784401	100.00	26	0	0	75	100	104701	104676	2e-08	49.1
HWI-ST942:56:C4CFMACXX:7:1301:9032:530911	100.00	77	0	0	1	77	111057	110981	8e-37	143
HWI-ST942:56:C4CFMACXX:7:1301:9032:530911	100.00	25	0	0	75	99	114680	114704	6e-08	47.3
HWI-ST942:56:C4CFMACXX:7:1302:1998:638962	96.77	31	0	1	1	30	90489	90459	5e-09	51.0
HWI-ST942:56:C4CFMACXX:7:1302:1998:638962	100.00	70	0	0	27	96	13819	13888	6e-33	130
HWI-ST942:56:C4CFMACXX:7:1303:12786:252772	100.00	70	0	0	1	70	46712	46781	6e-33	130
HWI-ST942:56:C4CFMACXX:7:1303:12786:252772	100.00	31	0	0	70	100	74839	74869	3e-11	58.4
HWI-ST942:56:C4CFMACXX:7:1303:12935:681622	100.00	37	0	0	1	37	89624	89660	1e-14	69.4
HWI-ST942:56:C4CFMACXX:7:1303:12935:681622	100.00	72	0	0	29	100	98109	98038	5e-34	134
HWI-ST942:56:C4CFMACXX:7:1303:14785:601992	97.92	48	1	0	1	48	26681	26634	5e-19	84.2
HWI-ST942:56:C4CFMACXX:7:1303:14785:601992	98.00	50	1	0	39	88	26616	26665	4e-20	87.9
HWI-ST942:56:C4CFMACXX:7:1303:15546:147111	100.00	62	0	0	1	62	72446	72507	2e-28	115
HWI-ST942:56:C4CFMACXX:7:1303:15546:147111	100.00	37	0	0	63	99	88389	88425	1e-14	69.4
HWI-ST942:56:C4CFMACXX:7:1303:18331:130232	98.39	62	1	0	1	62	122164	122225	8e-27	110
HWI-ST942:56:C4CFMACXX:7:1303:18331:130232	100.00	43	0	0	57	99	122417	122375	6e-18	80.5
HWI-ST942:56:C4CFMACXX:7:1303:20189:194792	100.00	28	0	0	1	28	95557	95584	1e-09	52.8
HWI-ST942:56:C4CFMACXX:7:1303:20189:194792	100.00	75	0	0	26	100	95641	95567	1e-35	139
HWI-ST942:56:C4CFMACXX:7:1303:3113:195492	100.00	93	0	0	1	93	124884	124976	1e-45	172
HWI-ST942:56:C4CFMACXX:7:1303:3113:195492	96.00	25	0	1	75	99	50548	50525	1e-05	39.9
HWI-ST942:56:C4CFMACXX:7:1304:10276:243041	100.00	81	0	0	1	81	98953	98873	5e-39	150
HWI-ST942:56:C4CFMACXX:7:1304:10276:243041	100.00	22	0	0	79	100	54823	54802	3e-06	41.7
HWI-ST942:56:C4CFMACXX:7:1304:14162:380472	100.00	32	0	0	1	32	81416	81385	8e-12	60.2
HWI-ST942:56:C4CFMACXX:7:1304:14162:380472	98.70	77	0	1	25	100	81336	81412	1e-34	135
HWI-ST942:56:C4CFMACXX:7:1304:14179:111362	96.08	51	2	0	1	51	88196	88146	5e-19	84.2
HWI-ST942:56:C4CFMACXX:7:1304:14179:111362	100.00	55	0	0	45	99	88088	88142	1e-24	102
HWI-ST942:56:C4CFMACXX:7:1304:15492:447871	100.00	86	0	0	1	86	18249	18334	8e-42	159
HWI-ST942:56:C4CFMACXX:7:1304:15492:447871	92.59	27	2	0	74	100	35769	35743	1e-05	39.9
HWI-ST942:56:C4CFMACXX:7:1304:15492:447872	97.18	71	2	0	1	71	35699	35769	4e-30	121
HWI-ST942:56:C4CFMACXX:7:1304:15492:447872	100.00	41	0	0	59	99	18334	18294	8e-17	76.8
HWI-ST942:56:C4CFMACXX:7:1304:17549:998242	98.65	74	1	0	1	74	102294	102367	2e-33	132
HWI-ST942:56:C4CFMACXX:7:1304:17549:998242	100.00	37	0	0	64	100	101597	101561	1e-14	69.4
HWI-ST942:56:C4CFMACXX:7:1304:4072:612281	100.00	44	0	0	1	44	101485	101442	2e-18	82.4
HWI-ST942:56:C4CFMACXX:7:1304:4072:612281	100.00	56	0	0	45	100	101549	101494	4e-25	104
HWI-ST942:56:C4CFMACXX:7:1304:4336:86802	98.68	76	0	1	1	75	113893	113968	5e-34	134
HWI-ST942:56:C4CFMACXX:7:1304:4336:86802	94.59	37	1	1	64	100	31861	31896	1e-10	56.5
HWI-ST942:56:C4CFMACXX:7:1304:8694:918122	100.00	40	0	0	1	40	20888	20849	3e-16	75.0
HWI-ST942:56:C4CFMACXX:7:1304:8694:918122	100.00	62	0	0	38	99	20826	20887	2e-28	115
HWI-ST942:56:C4CFMACXX:7:1304:9371:543901	98.88	89	0	1	1	89	39231	39144	3e-41	158
HWI-ST942:56:C4CFMACXX:7:1304:9371:543901	100.00	20	0	0	81	100	123544	123525	4e-05	38.1
HWI-ST942:56:C4CFMACXX:7:1304:9818:979502	97.78	45	1	0	1	45	27608	27564	2e-17	78.7
HWI-ST942:56:C4CFMACXX:7:1304:9818:979502	98.48	66	0	1	36	100	27543	27608	2e-28	115
HWI-ST942:56:C4CFMACXX:7:1305:1158:578382	100.00	83	0	0	1	83	10379	10461	4e-40	154
HWI-ST942:56:C4CFMACXX:7:1305:1158:578382	95.83	24	0	1	76	99	59651	59629	4e-05	38.1
HWI-ST942:56:C4CFMACXX:7:1305:14885:898771	100.00	43	0	0	1	43	108798	108756	6e-18	80.5
HWI-ST942:56:C4CFMACXX:7:1305:14885:898771	98.48	66	1	0	35	100	108769	108834	5e-29	117
HWI-ST942:56:C4CFMACXX:7:1305:14885:898772	98.53	68	1	0	1	68	108836	108769	4e-30	121
HWI-ST942:56:C4CFMACXX:7:1305:14885:898772	100.00	40	0	0	60	99	108756	108795	3e-16	75.0
HWI-ST942:56:C4CFMACXX:7:1305:14904:552132	100.00	69	0	0	1	69	117059	116991	2e-32	128
HWI-ST942:56:C4CFMACXX:7:1305:14904:552132	100.00	31	0	0	70	100	123884	123914	3e-11	58.4
HWI-ST942:56:C4CFMACXX:7:1305:16696:362372	100.00	76	0	0	1	76	43212	43137	3e-36	141
HWI-ST942:56:C4CFMACXX:7:1305:16696:362372	100.00	27	0	0	71	97	43120	43146	5e-09	51.0
HWI-ST942:56:C4CFMACXX:7:1305:2904:523492	96.88	32	1	0	1	32	112792	112823	4e-10	54.7
HWI-ST942:56:C4CFMACXX:7:1305:2904:523492	100.00	78	0	0	23	100	112878	112801	2e-37	145
HWI-ST942:56:C4CFMACXX:7:1305:4696:732562	100.00	29	0	0	1	29	73643	73615	4e-10	54.7
HWI-ST942:56:C4CFMACXX:7:1305:4696:732562	100.00	75	0	0	26	100	57255	57329	1e-35	139
HWI-ST942:56:C4CFMACXX:7:1305:8551:923242	100.00	25	0	0	1	25	63919	63895	6e-08	47.3
HWI-ST942:56:C4CFMACXX:7:1305:8551:923242	100.00	74	0	0	26	99	63894	63967	4e-35	137
HWI-ST942:56:C4CFMACXX:7:1306:10796:733382	100.00	29	0	0	1	29	8317	8289	4e-10	54.7
HWI-ST942:56:C4CFMACXX:7:1306:10796:733382	100.00	73	0	0	28	100	8289	8361	1e-34	135
HWI-ST942:56:C4CFMACXX:7:1306:1586:929981	100.00	85	0	0	1	85	58372	58456	3e-41	158
HWI-ST942:56:C4CFMACXX:7:1306:1586:929981	100.00	24	0	0	76	99	20689	20666	2e-07	45.4
HWI-ST942:56:C4CFMACXX:7:1306:18299:118822	100.00	68	0	0	1	68	84416	84483	8e-32	126
HWI-ST942:56:C4CFMACXX:7:1306:18299:118822	100.00	35	0	0	66	100	84711	84745	2e-13	65.8
HWI-ST942:56:C4CFMACXX:7:1306:18863:473172	100.00	77	0	0	1	77	102342	102418	8e-37	143
HWI-ST942:56:C4CFMACXX:7:1306:18863:473172	100.00	24	0	0	76	99	87528	87551	2e-07	45.4
HWI-ST942:56:C4CFMACXX:7:1306:19592:877782	100.00	77	0	0	1	77	75277	75353	8e-37	143
HWI-ST942:56:C4CFMACXX:7:1306:19592:877782	100.00	36	0	0	65	100	66020	65985	5e-14	67.6
HWI-ST942:56:C4CFMACXX:7:1306:20401:223151	100.00	33	0	0	1	33	121895	121863	2e-12	62.1
HWI-ST942:56:C4CFMACXX:7:1306:20401:223151	100.00	42	0	0	35	76	121922	121963	2e-17	78.7
HWI-ST942:56:C4CFMACXX:7:1306:20401:223152	100.00	42	0	0	1	42	121963	121922	2e-17	78.7
HWI-ST942:56:C4CFMACXX:7:1306:20401:223152	100.00	34	0	0	43	76	121862	121895	5e-13	63.9
HWI-ST942:56:C4CFMACXX:7:1306:20553:855752	100.00	46	0	0	1	46	82012	82057	1e-19	86.1
HWI-ST942:56:C4CFMACXX:7:1306:20553:855752	100.00	60	0	0	41	100	82096	82037	2e-27	111
HWI-ST942:56:C4CFMACXX:7:1306:20601:848532	100.00	65	0	0	1	65	86008	85944	4e-30	121
HWI-ST942:56:C4CFMACXX:7:1306:20601:848532	100.00	35	0	0	65	99	101950	101916	2e-13	65.8
HWI-ST942:56:C4CFMACXX:7:1306:2168:120892	100.00	77	0	0	1	77	91397	91321	8e-37	143
HWI-ST942:56:C4CFMACXX:7:1306:2168:120892	100.00	23	0	0	78	100	95530	95508	8e-07	43.6
HWI-ST942:56:C4CFMACXX:7:1306:2170:116141	100.00	63	0	0	1	63	17857	17795	5e-29	117
HWI-ST942:56:C4CFMACXX:7:1306:2170:116141	100.00	41	0	0	60	100	78732	78772	8e-17	76.8
HWI-ST942:56:C4CFMACXX:7:1306:2290:946862	100.00	35	0	0	1	35	33618	33584	2e-13	65.8
HWI-ST942:56:C4CFMACXX:7:1306:2290:946862	100.00	64	0	0	35	98	28169	28106	1e-29	119
HWI-ST942:56:C4CFMACXX:7:1306:2392:911971	100.00	44	0	0	1	44	76145	76188	2e-18	82.4
HWI-ST942:56:C4CFMACXX:7:1306:2392:911971	100.00	56	0	0	45	100	83494	83439	4e-25	104
HWI-ST942:56:C4CFMACXX:7:1306:7992:536351	100.00	80	0	0	1	80	56593	56514	2e-38	148
HWI-ST942:56:C4CFMACXX:7:1306:7992:536351	100.00	22	0	0	79	100	33287	33266	3e-06	41.7
HWI-ST942:56:C4CFMACXX:7:1307:11143:232472	100.00	26	0	0	1	26	95144	95119	2e-08	49.1
HWI-ST942:56:C4CFMACXX:7:1307:11143:232472	100.00	78	0	0	21	98	95092	95169	2e-37	145
HWI-ST942:56:C4CFMACXX:7:1307:11298:558591	100.00	64	0	0	1	64	111658	111595	1e-29	119
HWI-ST942:56:C4CFMACXX:7:1307:11298:558591	96.30	27	0	1	55	80	23209	23183	6e-07	43.6
HWI-ST942:56:C4CFMACXX:7:1307:11298:558592	96.15	26	0	1	1	25	23184	23209	2e-06	41.7
HWI-ST942:56:C4CFMACXX:7:1307:11298:558592	100.00	64	0	0	16	79	111595	111658	1e-29	119
HWI-ST942:56:C4CFMACXX:7:1307:1637:829852	100.00	49	0	0	1	49	109675	109723	3e-21	91.6
HWI-ST942:56:C4CFMACXX:7:1307:1637:829852	100.00	61	0	0	40	100	109777	109717	6e-28	113
HWI-ST942:56:C4CFMACXX:7:1307:19564:814702	100.00	25	0	0	1	25	110630	110654	6e-08	47.3
HWI-ST942:56:C4CFMACXX:7:1307:19564:814702	100.00	73	0	0	24	96	110741	110669	1e-34	135
HWI-ST942:56:C4CFMACXX:7:1307:7850:690681	100.00	52	0	0	1	52	46230	46281	6e-23	97.1
HWI-ST942:56:C4CFMACXX:7:1307:7850:690681	100.00	56	0	0	45	100	85145	85090	4e-25	104
HWI-ST942:56:C4CFMACXX:7:1307:8024:529202	100.00	63	0	0	1	63	100271	100333	5e-29	117
HWI-ST942:56:C4CFMACXX:7:1307:8024:529202	100.00	39	0	0	62	100	112567	112605	1e-15	73.1
HWI-ST942:56:C4CFMACXX:7:1308:10258:665152	96.15	52	0	1	1	50	70223	70274	5e-19	84.2
HWI-ST942:56:C4CFMACXX:7:1308:10258:665152	98.36	61	0	1	37	96	4106	4166	1e-25	106
HWI-ST942:56:C4CFMACXX:7:1308:11064:1000502	100.00	26	0	0	1	26	41141	41116	2e-08	49.1
HWI-ST942:56:C4CFMACXX:7:1308:11064:1000502	100.00	76	0	0	23	98	41101	41176	3e-36	141
HWI-ST942:56:C4CFMACXX:7:1308:17521:753872	98.08	52	1	0	1	52	63043	63094	3e-21	91.6
HWI-ST942:56:C4CFMACXX:7:1308:17521:753872	100.00	56	0	0	44	99	11067	11122	4e-25	104
HWI-ST942:56:C4CFMACXX:7:1308:18841:677041	100.00	57	0	0	1	57	120946	121002	1e-25	106
HWI-ST942:56:C4CFMACXX:7:1308:18841:677041	93.94	66	1	2	37	99	112252	112187	6e-23	97.1
HWI-ST942:56:C4CFMACXX:7:1308:18841:677042	95.00	80	1	2	1	77	112173	112252	1e-30	122
HWI-ST942:56:C4CFMACXX:7:1308:18841:677042	100.00	40	0	0	57	96	121002	120963	3e-16	75.0
HWI-ST942:56:C4CFMACXX:7:1308:6673:814742	100.00	25	0	0	1	25	9235	9211	6e-08	47.3
HWI-ST942:56:C4CFMACXX:7:1308:6673:814742	100.00	80	0	0	21	100	9188	9267	2e-38	148
HWI-ST942:56:C4CFMACXX:7:1309:14118:812681	100.00	76	0	0	1	76	24596	24671	3e-36	141
HWI-ST942:56:C4CFMACXX:7:1309:14118:812681	100.00	34	0	0	67	100	20024	19991	6e-13	63.9
HWI-ST942:56:C4CFMACXX:7:1309:14118:812682	100.00	37	0	0	1	37	19988	20024	1e-14	69.4
HWI-ST942:56:C4CFMACXX:7:1309:14118:812682	100.00	72	0	0	28	99	24671	24600	5e-34	134
HWI-ST942:56:C4CFMACXX:7:1309:16088:736691	100.00	44	0	0	1	44	58314	58271	2e-18	82.4
HWI-ST942:56:C4CFMACXX:7:1309:16088:736691	100.00	56	0	0	44	99	58269	58324	4e-25	104
HWI-ST942:56:C4CFMACXX:7:1309:18595:618411	100.00	83	0	0	1	83	30236	30318	4e-40	154
HWI-ST942:56:C4CFMACXX:7:1309:18595:618411	100.00	20	0	0	80	99	57282	57263	4e-05	38.1
HWI-ST942:56:C4CFMACXX:7:1309:18595:618412	98.48	66	1	0	1	66	57217	57282	5e-29	117
HWI-ST942:56:C4CFMACXX:7:1309:18595:618412	100.00	37	0	0	63	99	30318	30282	1e-14	69.4
HWI-ST942:56:C4CFMACXX:7:1309:18665:445562	100.00	59	0	0	1	59	34528	34586	8e-27	110
HWI-ST942:56:C4CFMACXX:7:1309:18665:445562	100.00	47	0	0	50	96	111576	111530	4e-20	87.9
HWI-ST942:56:C4CFMACXX:7:1309:20129:764131	98.57	70	1	0	1	70	67226	67157	3e-31	124
HWI-ST942:56:C4CFMACXX:7:1309:20129:764131	100.00	21	0	0	75	95	59387	59407	1e-05	39.9
HWI-ST942:56:C4CFMACXX:7:1309:20317:25921	100.00	52	0	0	1	52	96580	96631	6e-23	97.1
HWI-ST942:56:C4CFMACXX:7:1309:20317:25921	97.62	42	1	0	59	100	88817	88858	1e-15	73.1
HWI-ST942:56:C4CFMACXX:7:1309:20317:25922	98.25	57	1	0	1	57	88873	88817	5e-24	100
HWI-ST942:56:C4CFMACXX:7:1309:20317:25922	100.00	37	0	0	64	100	96631	96595	1e-14	69.4
HWI-ST942:56:C4CFMACXX:7:1309:3368:701662	92.86	56	4	0	1	56	65943	65888	2e-18	82.4
HWI-ST942:56:C4CFMACXX:7:1309:3368:701662	100.00	59	0	0	34	92	65886	65944	7e-27	110
HWI-ST942:56:C4CFMACXX:7:1309:4199:447832	95.95	74	2	1	1	74	90433	90361	1e-29	119
HWI-ST942:56:C4CFMACXX:7:1309:4199:447832	100.00	46	0	0	55	100	12560	12605	1e-19	86.1
HWI-ST942:56:C4CFMACXX:7:1310:14022:80522	98.61	72	1	0	1	72	97398	97327	2e-32	128
HWI-ST942:56:C4CFMACXX:7:1310:14022:80522	100.00	37	0	0	64	100	45495	45459	1e-14	69.4
HWI-ST942:56:C4CFMACXX:7:1310:15798:456922	100.00	48	0	0	1	48	80225	80178	1e-20	89.8
HWI-ST942:56:C4CFMACXX:7:1310:15798:456922	98.21	56	0	1	44	98	80333	80278	6e-23	97.1
HWI-ST942:56:C4CFMACXX:7:1310:18710:627342	98.61	72	1	0	1	72	54890	54961	2e-32	128
HWI-ST942:56:C4CFMACXX:7:1310:18710:627342	100.00	28	0	0	72	99	68513	68540	1e-09	52.8
HWI-ST942:56:C4CFMACXX:7:1310:18933:106282	97.14	35	0	1	1	34	93842	93808	3e-11	58.4
HWI-ST942:56:C4CFMACXX:7:1310:18933:106282	100.00	71	0	0	25	95	93713	93783	2e-33	132
HWI-ST942:56:C4CFMACXX:7:1310:21039:976272	95.12	41	2	0	1	41	109046	109006	2e-13	65.8
HWI-ST942:56:C4CFMACXX:7:1310:21039:976272	100.00	23	0	0	78	100	28515	28537	8e-07	43.6
HWI-ST942:56:C4CFMACXX:7:1310:7534:177802	98.39	62	1	0	1	62	21428	21367	8e-27	110
HWI-ST942:56:C4CFMACXX:7:1310:7534:177802	100.00	43	0	0	57	99	21350	21392	6e-18	80.5
HWI-ST942:56:C4CFMACXX:7:1311:15940:238512	94.44	36	1	1	1	35	62706	62671	4e-10	54.7
HWI-ST942:56:C4CFMACXX:7:1311:15940:238512	100.00	72	0	0	29	100	26244	26173	5e-34	134
HWI-ST942:56:C4CFMACXX:7:1311:17757:363911	98.61	72	1	0	1	72	583	654	2e-32	128
HWI-ST942:56:C4CFMACXX:7:1311:17757:363911	96.00	25	1	0	73	97	664	688	3e-06	41.7
HWI-ST942:56:C4CFMACXX:7:1311:21227:291592	98.78	82	1	0	1	82	123805	123724	6e-38	147
HWI-ST942:56:C4CFMACXX:7:1311:21227:291592	100.00	25	0	0	76	100	123714	123738	6e-08	47.3
HWI-ST942:56:C4CFMACXX:7:1311:7737:734272	97.75	89	2	0	1	89	75065	75153	4e-40	154
HWI-ST942:56:C4CFMACXX:7:1311:7737:734272	100.00	26	0	0	75	100	2969	2994	2e-08	49.1
HWI-ST942:56:C4CFMACXX:7:1312:1148:221461	100.00	47	0	0	1	47	35613	35567	4e-20	87.9
HWI-ST942:56:C4CFMACXX:7:1312:1148:221461	98.11	53	1	0	47	99	35640	35588	8e-22	93.5
HWI-ST942:56:C4CFMACXX:7:1312:1148:221462	96.23	53	2	0	1	53	35588	35640	4e-20	87.9
HWI-ST942:56:C4CFMACXX:7:1312:1148:221462	100.00	47	0	0	53	99	35567	35613	4e-20	87.9
HWI-ST942:56:C4CFMACXX:7:1312:13598:850061	100.00	69	0	0	1	69	12049	12117	2e-32	128
HWI-ST942:56:C4CFMACXX:7:1312:13598:850061	100.00	33	0	0	68	100	12553	12521	2e-12	62.1
HWI-ST942:56:C4CFMACXX:7:1312:4438:54381	100.00	75	0	0	1	75	55010	55084	1e-35	139
HWI-ST942:56:C4CFMACXX:7:1312:4438:54381	100.00	27	0	0	74	100	5761	5735	5e-09	51.0
HWI-ST942:56:C4CFMACXX:7:1312:6675:899302	100.00	48	0	0	1	48	85172	85125	1e-20	89.8
HWI-ST942:56:C4CFMACXX:7:1312:6675:899302	95.92	49	2	0	46	94	84987	85035	6e-18	80.5
HWI-ST942:56:C4CFMACXX:7:1312:7884:607892	100.00	80	0	0	1	80	58115	58194	2e-38	148
HWI-ST942:56:C4CFMACXX:7:1312:7884:607892	100.00	32	0	0	68	99	11212	11181	8e-12	60.2
HWI-ST942:56:C4CFMACXX:7:1312:9192:991782	100.00	30	0	0	1	30	65703	65732	1e-10	56.5
HWI-ST942:56:C4CFMACXX:7:1312:9192:991782	100.00	78	0	0	19	96	65732	65655	2e-37	145
HWI-ST942:56:C4CFMACXX:7:1312:9983:846291	100.00	80	0	0	1	80	87422	87501	2e-38	148
HWI-ST942:56:C4CFMACXX:7:1312:9983:846291	92.50	40	2	1	61	99	122612	122573	1e-10	56.5
HWI-ST942:56:C4CFMACXX:7:1312:9983:846292	95.38	65	2	1	1	64	122548	122612	1e-24	102
HWI-ST942:56:C4CFMACXX:7:1312:9983:846292	100.00	56	0	0	45	100	87501	87446	4e-25	104
HWI-ST942:56:C4CFMACXX:7:1313:10229:434231	100.00	74	0	0	1	74	97904	97831	4e-35	137
HWI-ST942:56:C4CFMACXX:7:1313:10229:434231	100.00	27	0	0	74	100	11789	11763	5e-09	51.0
HWI-ST942:56:C4CFMACXX:7:1313:13053:1004542	100.00	28	0	0	1	28	77684	77711	1e-09	52.8
HWI-ST942:56:C4CFMACXX:7:1313:13053:1004542	100.00	72	0	0	29	100	77711	77640	5e-34	134
HWI-ST942:56:C4CFMACXX:7:1313:14029:410131	100.00	64	0	0	1	64	91001	91064	1e-29	119
HWI-ST942:56:C4CFMACXX:7:1313:14029:410131	100.00	36	0	0	64	99	66543	66578	5e-14	67.6
HWI-ST942:56:C4CFMACXX:7:1313:15475:392381	100.00	76	0	0	1	76	96002	95927	3e-36	141
HWI-ST942:56:C4CFMACXX:7:1313:15475:392381	100.00	24	0	0	73	96	78688	78711	2e-07	45.4
HWI-ST942:56:C4CFMACXX:7:1313:16850:20872	94.44	36	2	0	1	36	107155	107190	1e-10	56.5
HWI-ST942:56:C4CFMACXX:7:1313:16850:20872	100.00	79	0	0	22	100	107222	107144	6e-38	147
HWI-ST942:56:C4CFMACXX:7:1313:17917:981161	100.00	63	0	0	1	63	62151	62089	5e-29	117
HWI-ST942:56:C4CFMACXX:7:1313:17917:981161	100.00	38	0	0	63	100	30960	30997	4e-15	71.3
HWI-ST942:56:C4CFMACXX:7:1313:20102:407391	100.00	74	0	0	1	74	27148	27075	4e-35	137
HWI-ST942:56:C4CFMACXX:7:1313:20102:407391	100.00	27	0	0	74	100	117405	117431	5e-09	51.0
HWI-ST942:56:C4CFMACXX:7:1313:3303:421621	100.00	74	0	0	1	74	76820	76747	4e-35	137
HWI-ST942:56:C4CFMACXX:7:1313:3303:421621	100.00	26	0	0	75	100	118383	118408	2e-08	49.1
HWI-ST942:56:C4CFMACXX:7:1313:3973:568622	100.00	74	0	0	1	74	59617	59544	4e-35	137
HWI-ST942:56:C4CFMACXX:7:1313:3973:568622	100.00	31	0	0	70	100	59533	59563	3e-11	58.4
HWI-ST942:56:C4CFMACXX:7:1313:6418:378472	100.00	49	0	0	1	49	75460	75412	3e-21	91.6
HWI-ST942:56:C4CFMACXX:7:1313:6418:378472	91.46	82	6	1	20	100	32768	32687	2e-27	111
HWI-ST942:56:C4CFMACXX:7:1313:8005:195482	100.00	46	0	0	1	46	79245	79290	1e-19	86.1
HWI-ST942:56:C4CFMACXX:7:1313:8005:195482	100.00	59	0	0	42	100	79306	79248	8e-27	110
HWI-ST942:56:C4CFMACXX:7:1313:8730:683292	100.00	77	0	0	1	77	86367	86443	7e-37	143
HWI-ST942:56:C4CFMACXX:7:1313:8730:683292	100.00	20	0	0	76	95	95372	95391	4e-05	38.1
HWI-ST942:56:C4CFMACXX:7:1314:12873:393802	100.00	39	0	0	1	39	115790	115828	1e-15	73.1
HWI-ST942:56:C4CFMACXX:7:1314:12873:393802	100.00	66	0	0	31	96	115891	115826	1e-30	122
HWI-ST942:56:C4CFMACXX:7:1314:15488:125152	100.00	82	0	0	1	82	82081	82000	1e-39	152
HWI-ST942:56:C4CFMACXX:7:1314:15488:125152	93.55	31	0	2	66	96	69523	69551	2e-07	45.4
HWI-ST942:56:C4CFMACXX:7:1314:7907:483852	100.00	41	0	0	1	41	104291	104331	8e-17	76.8
HWI-ST942:56:C4CFMACXX:7:1314:7907:483852	96.92	65	2	0	36	100	104349	104285	8e-27	110
HWI-ST942:56:C4CFMACXX:7:1314:7980:78391	100.00	41	0	0	1	41	90813	90853	8e-17	76.8
HWI-ST942:56:C4CFMACXX:7:1314:7980:78391	100.00	58	0	0	41	98	90783	90840	3e-26	108
HWI-ST942:56:C4CFMACXX:7:1314:7980:78392	100.00	70	0	0	1	70	90852	90783	6e-33	130
HWI-ST942:56:C4CFMACXX:7:1314:7980:78392	100.00	31	0	0	70	100	90853	90823	3e-11	58.4
HWI-ST942:56:C4CFMACXX:7:1315:1139:487272	94.20	69	4	0	1	69	14015	14083	1e-25	106
HWI-ST942:56:C4CFMACXX:7:1315:1139:487272	100.00	50	0	0	50	99	60738	60787	8e-22	93.5
HWI-ST942:56:C4CFMACXX:7:1315:14070:451852	100.00	25	0	0	1	25	98140	98116	6e-08	47.3
HWI-ST942:56:C4CFMACXX:7:1315:14070:451852	100.00	76	0	0	24	99	98116	98191	3e-36	141
HWI-ST942:56:C4CFMACXX:7:1315:17447:66862	96.00	25	1	0	1	25	98154	98130	3e-06	41.7
HWI-ST942:56:C4CFMACXX:7:1315:17447:66862	100.00	81	0	0	19	99	98069	98149	5e-39	150
HWI-ST942:56:C4CFMACXX:7:1315:17588:758532	96.00	25	1	0	1	25	100651	100675	3e-06	41.7
HWI-ST942:56:C4CFMACXX:7:1315:17588:758532	100.00	81	0	0	20	100	100688	100608	5e-39	150
HWI-ST942:56:C4CFMACXX:7:1315:20413:891902	100.00	30	0	0	1	30	39579	39608	1e-10	56.5
HWI-ST942:56:C4CFMACXX:7:1315:20413:891902	100.00	75	0	0	26	100	39622	39548	1e-35	139
HWI-ST942:56:C4CFMACXX:7:1315:21100:989221	100.00	45	0	0	1	45	125680	125724	4e-19	84.2
HWI-ST942:56:C4CFMACXX:7:1315:21100:989221	100.00	36	0	0	41	76	32237	32272	4e-14	67.6
HWI-ST942:56:C4CFMACXX:7:1315:21100:989222	100.00	36	0	0	1	36	32272	32237	3e-14	67.6
HWI-ST942:56:C4CFMACXX:7:1315:21100:989222	100.00	45	0	0	32	76	125724	125680	3e-19	84.2
HWI-ST942:56:C4CFMACXX:7:1315:3776:694701	100.00	55	0	0	1	55	113232	113286	1e-24	102
HWI-ST942:56:C4CFMACXX:7:1315:3776:694701	100.00	45	0	0	56	100	57991	57947	5e-19	84.2
HWI-ST942:56:C4CFMACXX:7:1315:3828:882372	98.44	64	1	0	1	64	103950	103887	6e-28	113
HWI-ST942:56:C4CFMACXX:7:1315:3828:882372	100.00	44	0	0	56	99	103629	103672	2e-18	82.4
HWI-ST942:56:C4CFMACXX:7:1315:5487:938191	100.00	76	0	0	1	76	108044	108119	3e-36	141
HWI-ST942:56:C4CFMACXX:7:1315:5487:938191	94.29	35	0	2	60	93	108119	108086	1e-09	52.8
HWI-ST942:56:C4CFMACXX:7:1315:5487:938192	94.29	35	0	2	1	34	108086	108119	1e-09	52.8
HWI-ST942:56:C4CFMACXX:7:1315:5487:938192	100.00	76	0	0	18	93	108119	108044	3e-36	141
HWI-ST942:56:C4CFMACXX:7:1315:6306:396742	100.00	36	0	0	1	36	86565	86600	5e-14	67.6
HWI-ST942:56:C4CFMACXX:7:1315:6306:396742	100.00	58	0	0	37	94	86645	86588	3e-26	108
HWI-ST942:56:C4CFMACXX:7:1315:6478:264401	100.00	67	0	0	1	67	106981	106915	3e-31	124
HWI-ST942:56:C4CFMACXX:7:1315:6478:264401	100.00	33	0	0	68	100	55433	55465	2e-12	62.1
HWI-ST942:56:C4CFMACXX:7:1315:7068:583741	100.00	56	0	0	1	56	55044	54989	4e-25	104
HWI-ST942:56:C4CFMACXX:7:1315:7068:583741	100.00	57	0	0	44	100	55343	55287	1e-25	106
HWI-ST942:56:C4CFMACXX:7:1316:12961:978142	100.00	72	0	0	1	72	41457	41528	5e-34	134
HWI-ST942:56:C4CFMACXX:7:1316:12961:978142	100.00	35	0	0	66	100	90175	90141	2e-13	65.8
HWI-ST942:56:C4CFMACXX:7:1316:15112:160851	100.00	68	0	0	1	68	35500	35567	8e-32	126
HWI-ST942:56:C4CFMACXX:7:1316:15112:160851	100.00	34	0	0	67	100	85392	85425	6e-13	63.9
HWI-ST942:56:C4CFMACXX:7:1316:20198:390141	100.00	68	0	0	1	68	32565	32632	8e-32	126
HWI-ST942:56:C4CFMACXX:7:1316:20198:390141	97.50	40	1	0	61	100	72810	72771	1e-14	69.4
HWI-ST942:56:C4CFMACXX:7:1316:2516:123992	98.00	50	1	0	1	50	26407	26358	4e-20	87.9
HWI-ST942:56:C4CFMACXX:7:1316:2516:123992	100.00	60	0	0	41	100	26331	26390	2e-27	111
HWI-ST942:56:C4CFMACXX:7:1316:7766:200242	100.00	59	0	0	1	59	61388	61446	8e-27	110
HWI-ST942:56:C4CFMACXX:7:1316:7766:200242	100.00	44	0	0	57	100	100540	100583	2e-18	82.4
HWI-ST942:56:C4CFMACXX:7:1316:9833:544882	97.37	76	1	1	1	76	34334	34260	2e-32	128
HWI-ST942:56:C4CFMACXX:7:1316:9833:544882	100.00	36	0	0	65	100	34462	34427	5e-14	67.6
HWI-ST942:56:C4CFMACXX:7:2101:11028:375952	100.00	58	0	0	1	58	40140	40083	3e-26	108
HWI-ST942:56:C4CFMACXX:7:2101:11028:375952	100.00	46	0	0	54	99	2303	2348	1e-19	86.1
HWI-ST942:56:C4CFMACXX:7:2101:11541:906112	96.39	83	2	1	1	82	108596	108514	1e-34	135
HWI-ST942:56:C4CFMACXX:7:2101:11541:906112	100.00	33	0	0	67	99	119573	119605	2e-12	62.1
HWI-ST942:56:C4CFMACXX:7:2101:12076:957242	100.00	35	0	0	1	35	68000	68034	2e-13	65.8
HWI-ST942:56:C4CFMACXX:7:2101:12076:957242	98.51	67	1	0	34	100	68057	67991	1e-29	119
HWI-ST942:56:C4CFMACXX:7:2101:1218:579472	96.92	65	2	0	1	65	70145	70209	8e-27	110
HWI-ST942:56:C4CFMACXX:7:2101:1218:579472	100.00	53	0	0	48	100	4523	4575	2e-23	99.0
HWI-ST942:56:C4CFMACXX:7:2101:12999:622151	100.00	55	0	0	1	55	112346	112400	1e-24	102
HWI-ST942:56:C4CFMACXX:7:2101:12999:622151	100.00	44	0	0	55	98	120026	120069	2e-18	82.4
HWI-ST942:56:C4CFMACXX:7:2101:12999:622152	100.00	77	0	0	1	77	120102	120026	8e-37	143
HWI-ST942:56:C4CFMACXX:7:2101:12999:622152	100.00	24	0	0	77	100	112400	112377	2e-07	45.4
HWI-ST942:56:C4CFMACXX:7:2101:19319:693162	100.00	31	0	0	1	31	120649	120619	3e-11	58.4
HWI-ST942:56:C4CFMACXX:7:2101:19319:693162	97.37	76	1	1	24	99	120619	120693	2e-32	128
HWI-ST942:56:C4CFMACXX:7:2102:12164:491292	100.00	25	0	0	1	25	12989	12965	6e-08	47.3
HWI-ST942:56:C4CFMACXX:7:2102:12164:491292	100.00	75	0	0	26	100	57972	57898	1e-35	139
HWI-ST942:56:C4CFMACXX:7:2102:14506:416431	100.00	81	0	0	1	81	32571	32651	5e-39	150
HWI-ST942:56:C4CFMACXX:7:2102:14506:416431	89.74	39	3	1	62	100	37618	37655	2e-08	49.1
HWI-ST942:56:C4CFMACXX:7:2102:14947:920182	100.00	77	0	0	1	77	61289	61365	8e-37	143
HWI-ST942:56:C4CFMACXX:7:2102:14947:920182	100.00	30	0	0	70	99	117122	117151	1e-10	56.5
HWI-ST942:56:C4CFMACXX:7:2102:1599:915341	100.00	73	0	0	1	73	104295	104367	1e-34	135
HWI-ST942:56:C4CFMACXX:7:2102:1599:915341	100.00	27	0	0	74	100	55597	55623	5e-09	51.0
HWI-ST942:56:C4CFMACXX:7:2102:17304:75482	100.00	23	0	0	1	23	31863	31841	8e-07	43.6
HWI-ST942:56:C4CFMACXX:7:2102:17304:75482	98.68	76	1	0	25	100	31840	31915	1e-34	135
HWI-ST942:56:C4CFMACXX:7:2102:2888:141852	100.00	67	0	0	1	67	14106	14172	3e-31	124
HWI-ST942:56:C4CFMACXX:7:2102:2888:141852	100.00	33	0	0	68	100	27411	27379	2e-12	62.1
HWI-ST942:56:C4CFMACXX:7:2102:4465:206752	100.00	82	0	0	1	82	88311	88392	1e-39	152
HWI-ST942:56:C4CFMACXX:7:2102:4465:206752	100.00	24	0	0	76	99	109329	109352	2e-07	45.4
HWI-ST942:56:C4CFMACXX:7:2102:6749:220812	100.00	81	0	0	1	81	124493	124413	5e-39	150
HWI-ST942:56:C4CFMACXX:7:2102:6749:220812	93.10	29	1	1	73	100	57364	57336	3e-06	41.7
HWI-ST942:56:C4CFMACXX:7:2102:6947:614642	96.77	31	1	0	1	31	71041	71071	1e-09	52.8
HWI-ST942:56:C4CFMACXX:7:2102:6947:614642	98.55	69	1	0	25	93	71112	71044	9e-31	122
HWI-ST942:56:C4CFMACXX:7:2103:12840:151122	98.65	74	0	1	1	74	110338	110266	6e-33	130
HWI-ST942:56:C4CFMACXX:7:2103:12840:151122	95.56	45	1	1	56	99	88140	88184	4e-15	71.3
HWI-ST942:56:C4CFMACXX:7:2103:13808:764602	100.00	51	0	0	1	51	3548	3498	2e-22	95.3
HWI-ST942:56:C4CFMACXX:7:2103:13808:764602	100.00	50	0	0	50	99	103033	103082	8e-22	93.5
HWI-ST942:56:C4CFMACXX:7:2103:13984:602682	100.00	24	0	0	1	24	107450	107427	2e-07	45.4
HWI-ST942:56:C4CFMACXX:7:2103:13984:602682	97.70	87	1	1	13	99	107647	107562	2e-38	148
HWI-ST942:56:C4CFMACXX:7:2103:14630:573392	96.67	30	1	0	1	30	48408	48437	5e-09	51.0
HWI-ST942:56:C4CFMACXX:7:2103:14630:573392	98.70	77	1	0	24	100	48515	48439	4e-35	137
HWI-ST942:56:C4CFMACXX:7:2103:19603:166812	98.00	50	1	0	1	50	47428	47379	4e-20	87.9
HWI-ST942:56:C4CFMACXX:7:2103:19603:166812	100.00	56	0	0	44	99	47361	47416	4e-25	104
HWI-ST942:56:C4CFMACXX:7:2103:1988:381021	98.00	50	1	0	1	50	16957	16908	4e-20	87.9
HWI-ST942:56:C4CFMACXX:7:2103:1988:381021	100.00	55	0	0	46	100	42155	42101	1e-24	102
HWI-ST942:56:C4CFMACXX:7:2103:3822:136712	100.00	73	0	0	1	73	126718	126646	1e-34	135
HWI-ST942:56:C4CFMACXX:7:2103:3822:136712	100.00	29	0	0	70	98	126609	126637	4e-10	54.7
HWI-ST942:56:C4CFMACXX:7:2103:5858:251831	100.00	78	0	0	1	78	104377	104300	2e-37	145
HWI-ST942:56:C4CFMACXX:7:2103:5858:251831	100.00	21	0	0	79	99	126387	126407	1e-05	39.9
HWI-ST942:56:C4CFMACXX:7:2103:5858:251832	100.00	47	0	0	1	47	126433	126387	4e-20	87.9
HWI-ST942:56:C4CFMACXX:7:2103:5858:251832	100.00	51	0	0	48	98	104300	104350	2e-22	95.3
HWI-ST942:56:C4CFMACXX:7:2104:11660:228562	100.00	41	0	0	1	41	41	1	8e-17	76.8
HWI-ST942:56:C4CFMACXX:7:2104:11660:228562	100.00	59	0	0	42	100	84171	84229	8e-27	110
HWI-ST942:56:C4CFMACXX:7:2104:13776:446332	100.00	60	0	0	1	60	21565	21506	2e-27	111
HWI-ST942:56:C4CFMACXX:7:2104:13776:446332	100.00	39	0	0	61	99	65311	65273	1e-15	73.1
HWI-ST942:56:C4CFMACXX:7:2104:16792:28812	100.00	25	0	0	1	25	52528	52504	6e-08	47.3
HWI-ST942:56:C4CFMACXX:7:2104:16792:28812	98.70	77	1	0	24	100	52397	52473	4e-35	137
HWI-ST942:56:C4CFMACXX:7:2104:20128:510582	100.00	73	0	0	1	73	93670	93742	1e-34	135
HWI-ST942:56:C4CFMACXX:7:2104:20128:510582	86.84	38	1	3	49	84	42002	41967	1e-05	39.9
HWI-ST942:56:C4CFMACXX:7:2104:3140:637962	100.00	23	0	0	1	23	63340	63362	8e-07	43.6
HWI-ST942:56:C4CFMACXX:7:2104:3140:637962	100.00	82	0	0	19	100	63406	63325	1e-39	152
HWI-ST942:56:C4CFMACXX:7:2104:4860:227341	100.00	76	0	0	1	76	28800	28875	3e-36	141
HWI-ST942:56:C4CFMACXX:7:2104:4860:227341	100.00	24	0	0	77	100	28874	28851	2e-07	45.4
HWI-ST942:56:C4CFMACXX:7:2104:4860:227342	100.00	25	0	0	1	25	28850	28874	6e-08	47.3
HWI-ST942:56:C4CFMACXX:7:2104:4860:227342	100.00	74	0	0	26	99	28875	28802	4e-35	137
HWI-ST942:56:C4CFMACXX:7:2105:19443:493252	93.22	59	4	0	1	59	25792	25850	4e-20	87.9
HWI-ST942:56:C4CFMACXX:7:2105:19443:493252	96.97	66	2	0	35	100	99200	99265	2e-27	111
HWI-ST942:56:C4CFMACXX:7:2105:2188:341482	100.00	81	0	0	1	81	24517	24437	5e-39	150
HWI-ST942:56:C4CFMACXX:7:2105:2188:341482	95.83	24	0	1	77	99	103726	103749	4e-05	38.1
HWI-ST942:56:C4CFMACXX:7:2105:2961:228232	96.10	77	2	1	1	76	3717	3793	3e-31	124
HWI-ST942:56:C4CFMACXX:7:2105:2961:228232	100.00	40	0	0	61	100	73959	73998	3e-16	75.0
HWI-ST942:56:C4CFMACXX:7:2106:10068:476182	97.67	43	1	0	1	43	38636	38678	3e-16	75.0
HWI-ST942:56:C4CFMACXX:7:2106:10068:476182	100.00	73	0	0	28	100	38680	38608	1e-34	135
HWI-ST942:56:C4CFMACXX:7:2106:6217:322822	97.62	84	0	2	1	84	70903	70822	7e-37	143
HWI-ST942:56:C4CFMACXX:7:2106:6217:322822	100.00	24	0	0	73	96	25389	25412	2e-07	45.4
HWI-ST942:56:C4CFMACXX:7:2106:6658:238471	100.00	77	0	0	1	77	111057	110981	8e-37	143
HWI-ST942:56:C4CFMACXX:7:2106:6658:238471	100.00	25	0	0	75	99	114680	114704	6e-08	47.3
HWI-ST942:56:C4CFMACXX:7:2106:7496:799612	100.00	56	0	0	1	56	72246	72301	4e-25	104
HWI-ST942:56:C4CFMACXX:7:2106:7496:799612	100.00	45	0	0	56	100	41972	42016	5e-19	84.2
HWI-ST942:56:C4CFMACXX:7:2106:9074:998702	100.00	35	0	0	1	35	89875	89841	2e-13	65.8
HWI-ST942:56:C4CFMACXX:7:2106:9074:998702	100.00	64	0	0	35	98	121698	121761	1e-29	119
HWI-ST942:56:C4CFMACXX:7:2107:10647:822352	100.00	41	0	0	1	41	36843	36883	8e-17	76.8
HWI-ST942:56:C4CFMACXX:7:2107:10647:822352	100.00	65	0	0	36	100	36943	36879	4e-30	121
HWI-ST942:56:C4CFMACXX:7:2107:10977:718472	97.78	45	1	0	1	45	73887	73931	2e-17	78.7
HWI-ST942:56:C4CFMACXX:7:2107:10977:718472	100.00	62	0	0	38	99	74031	73970	2e-28	115
HWI-ST942:56:C4CFMACXX:7:2107:13162:672071	100.00	69	0	0	1	69	94416	94484	2e-32	128
HWI-ST942:56:C4CFMACXX:7:2107:13162:672071	100.00	30	0	0	71	100	89776	89747	1e-10	56.5
HWI-ST942:56:C4CFMACXX:7:2107:13168:760012	100.00	42	0	0	1	42	69096	69055	2e-17	78.7
HWI-ST942:56:C4CFMACXX:7:2107:13168:760012	100.00	66	0	0	34	99	69008	69073	1e-30	122
HWI-ST942:56:C4CFMACXX:7:2107:14404:924361	100.00	80	0	0	1	80	4080	4159	2e-38	148
HWI-ST942:56:C4CFMACXX:7:2107:14404:924361	100.00	21	0	0	80	100	3395	3415	1e-05	39.9
HWI-ST942:56:C4CFMACXX:7:2107:14404:924362	100.00	24	0	0	1	24	3418	3395	2e-07	45.4
HWI-ST942:56:C4CFMACXX:7:2107:14404:924362	100.00	73	0	0	24	96	4159	4087	1e-34	135
HWI-ST942:56:C4CFMACXX:7:2107:19358:365242	93.75	64	4	0	1	64	61205	61142	6e-23	97.1
HWI-ST942:56:C4CFMACXX:7:2107:19358:365242	100.00	58	0	0	43	100	61142	61199	3e-26	108
HWI-ST942:56:C4CFMACXX:7:2107:21214:839462	100.00	36	0	0	1	36	63622	63657	5e-14	67.6
HWI-ST942:56:C4CFMACXX:7:2107:21214:839462	100.00	58	0	0	37	94	63657	63600	3e-26	108
HWI-ST942:56:C4CFMACXX:7:2107:3510:625482	97.73	44	1	0	1	44	77213	77170	8e-17	76.8
HWI-ST942:56:C4CFMACXX:7:2107:3510:625482	100.00	62	0	0	39	100	77154	77215	2e-28	115
HWI-ST942:56:C4CFMACXX:7:2107:8682:963362	100.00	44	0	0	1	44	22671	22714	2e-18	82.4
HWI-ST942:56:C4CFMACXX:7:2107:8682:963362	100.00	59	0	0	42	100	22726	22668	8e-27	110
HWI-ST942:56:C4CFMACXX:7:2107:8889:519052	100.00	60	0	0	1	60	908	967	2e-27	111
HWI-ST942:56:C4CFMACXX:7:2107:8889:519052	100.00	43	0	0	58	100	24703	24745	6e-18	80.5
HWI-ST942:56:C4CFMACXX:7:2108:14862:229732	98.61	72	1	0	1	72	34484	34555	2e-32	128
HWI-ST942:56:C4CFMACXX:7:2108:14862:229732	96.00	25	1	0	71	95	58058	58082	3e-06	41.7
HWI-ST942:56:C4CFMACXX:7:2108:15535:480011	100.00	82	0	0	1	82	32027	31946	1e-39	152
HWI-ST942:56:C4CFMACXX:7:2108:15535:480011	96.00	25	0	1	76	100	100224	100201	1e-05	39.9
HWI-ST942:56:C4CFMACXX:7:2108:15743:168511	100.00	69	0	0	1	69	4940	4872	2e-32	128
HWI-ST942:56:C4CFMACXX:7:2108:15743:168511	100.00	31	0	0	70	100	81839	81809	3e-11	58.4
HWI-ST942:56:C4CFMACXX:7:2108:1617:363782	100.00	58	0	0	1	58	29189	29246	3e-26	108
HWI-ST942:56:C4CFMACXX:7:2108:1617:363782	100.00	50	0	0	51	100	29263	29214	8e-22	93.5
HWI-ST942:56:C4CFMACXX:7:2108:18643:722571	100.00	78	0	0	1	78	95404	95481	2e-37	145
HWI-ST942:56:C4CFMACXX:7:2108:18643:722571	100.00	25	0	0	76	100	61469	61493	6e-08	47.3
HWI-ST942:56:C4CFMACXX:7:2108:19701:947822	100.00	61	0	0	1	61	75952	76012	6e-28	113
HWI-ST942:56:C4CFMACXX:7:2108:19701:947822	100.00	41	0	0	58	98	41062	41022	8e-17	76.8
HWI-ST942:56:C4CFMACXX:7:2108:3205:754272	96.49	57	1	1	1	57	87057	87112	8e-22	93.5
HWI-ST942:56:C4CFMACXX:7:2108:3205:754272	100.00	58	0	0	42	99	87194	87137	3e-26	108
HWI-ST942:56:C4CFMACXX:7:2108:5176:413372	100.00	66	0	0	1	66	26053	25988	1e-30	122
HWI-ST942:56:C4CFMACXX:7:2108:5176:413372	97.30	37	1	0	64	100	121549	121513	6e-13	63.9
HWI-ST942:56:C4CFMACXX:7:2108:6273:109342	100.00	73	0	0	1	73	41329	41401	1e-34	135
HWI-ST942:56:C4CFMACXX:7:2108:6273:109342	100.00	30	0	0	68	97	17420	17391	1e-10	56.5
HWI-ST942:56:C4CFMACXX:7:2108:6519:385652	100.00	40	0	0	1	40	71734	71773	3e-16	75.0
HWI-ST942:56:C4CFMACXX:7:2108:6519:385652	100.00	70	0	0	30	99	99315	99246	6e-33	130
HWI-ST942:56:C4CFMACXX:7:2108:7414:37672	98.28	58	1	0	1	58	112020	112077	1e-24	102
HWI-ST942:56:C4CFMACXX:7:2108:7414:37672	100.00	48	0	0	51	98	84438	84391	1e-20	89.8
HWI-ST942:56:C4CFMACXX:7:2108:9518:779131	100.00	61	0	0	1	61	54899	54959	6e-28	113
HWI-ST942:56:C4CFMACXX:7:2108:9518:779131	98.00	50	1	0	51	100	13519	13470	4e-20	87.9
HWI-ST942:56:C4CFMACXX:7:2108:9518:779132	98.11	53	1	0	1	53	13467	13519	8e-22	93.5
HWI-ST942:56:C4CFMACXX:7:2108:9518:779132	100.00	57	0	0	43	99	54959	54903	1e-25	106
HWI-ST942:56:C4CFMACXX:7:2108:9583:349482	100.00	35	0	0	1	35	89494	89460	2e-13	65.8
HWI-ST942:56:C4CFMACXX:7:2108:9583:349482	100.00	59	0	0	42	100	89454	89512	8e-27	110
HWI-ST942:56:C4CFMACXX:7:2109:16354:75081	100.00	30	0	0	1	30	41569	41598	1e-10	56.5
HWI-ST942:56:C4CFMACXX:7:2109:16354:75081	100.00	67	0	0	31	97	49932	49866	3e-31	124
HWI-ST942:56:C4CFMACXX:7:2109:16550:812291	100.00	37	0	0	1	37	125850	125814	1e-14	69.4
HWI-ST942:56:C4CFMACXX:7:2109:16550:812291	100.00	64	0	0	37	100	125630	125693	1e-29	119
HWI-ST942:56:C4CFMACXX:7:2109:17102:158662	100.00	69	0	0	1	69	54432	54500	2e-32	128
HWI-ST942:56:C4CFMACXX:7:2109:17102:158662	100.00	34	0	0	67	100	30252	30219	6e-13	63.9
HWI-ST942:56:C4CFMACXX:7:2109:19384:357542	100.00	22	0	0	1	22	128045	128066	3e-06	41.7
HWI-ST942:56:C4CFMACXX:7:2109:19384:357542	100.00	78	0	0	19	96	128091	128014	2e-37	145
HWI-ST942:56:C4CFMACXX:7:2109:3081:551392	96.97	66	1	1	1	65	69346	69281	8e-27	110
HWI-ST942:56:C4CFMACXX:7:2109:3081:551392	100.00	45	0	0	55	99	77435	77391	5e-19	84.2
HWI-ST942:56:C4CFMACXX:7:2109:4192:178632	100.00	52	0	0	1	52	56627	56576	6e-23	97.1
HWI-ST942:56:C4CFMACXX:7:2109:4192:178632	100.00	50	0	0	51	100	113061	113110	8e-22	93.5
HWI-ST942:56:C4CFMACXX:7:2109:6099:136091	100.00	59	0	0	1	59	96520	96578	8e-27	110
HWI-ST942:56:C4CFMACXX:7:2109:6099:136091	100.00	41	0	0	60	100	93712	93672	8e-17	76.8
HWI-ST942:56:C4CFMACXX:7:2109:6399:286282	95.92	49	2	0	1	49	95522	95570	6e-18	80.5
HWI-ST942:56:C4CFMACXX:7:2109:6399:286282	100.00	57	0	0	44	100	95602	95546	1e-25	106
HWI-ST942:56:C4CFMACXX:7:2109:6994:471731	100.00	38	0	0	1	38	79430	79467	3e-15	71.3
HWI-ST942:56:C4CFMACXX:7:2109:6994:471731	100.00	54	0	0	39	92	79404	79457	4e-24	100
HWI-ST942:56:C4CFMACXX:7:2109:6994:471732	100.00	54	0	0	1	54	79457	79404	4e-24	100
HWI-ST942:56:C4CFMACXX:7:2109:6994:471732	100.00	38	0	0	55	92	79467	79430	3e-15	71.3
HWI-ST942:56:C4CFMACXX:7:2109:7596:437041	100.00	78	0	0	1	78	119547	119470	2e-37	145
HWI-ST942:56:C4CFMACXX:7:2109:7596:437041	100.00	22	0	0	79	100	127841	127820	3e-06	41.7
HWI-ST942:56:C4CFMACXX:7:2109:8075:272742	94.12	51	2	1	1	50	26874	26924	8e-17	76.8
HWI-ST942:56:C4CFMACXX:7:2109:8075:272742	100.00	63	0	0	36	98	26979	26917	5e-29	117
HWI-ST942:56:C4CFMACXX:7:2109:8801:153961	95.35	43	2	0	1	43	23408	23450	1e-14	69.4
HWI-ST942:56:C4CFMACXX:7:2109:8801:153961	100.00	74	0	0	27	100	98559	98632	4e-35	137
HWI-ST942:56:C4CFMACXX:7:2110:10733:193751	100.00	55	0	0	1	55	88959	89013	1e-24	102
HWI-ST942:56:C4CFMACXX:7:2110:10733:193751	98.00	50	0	1	51	100	11644	11692	1e-19	86.1
HWI-ST942:56:C4CFMACXX:7:2110:10733:193752	98.51	67	0	1	1	67	11709	11644	5e-29	117
HWI-ST942:56:C4CFMACXX:7:2110:10733:193752	100.00	38	0	0	63	100	89013	88976	4e-15	71.3
HWI-ST942:56:C4CFMACXX:7:2110:13708:676171	100.00	68	0	0	1	68	105707	105774	8e-32	126
HWI-ST942:56:C4CFMACXX:7:2110:13708:676171	100.00	32	0	0	69	100	97271	97302	8e-12	60.2
HWI-ST942:56:C4CFMACXX:7:2110:16136:191752	96.97	33	1	0	1	33	71877	71845	1e-10	56.5
HWI-ST942:56:C4CFMACXX:7:2110:16136:191752	100.00	73	0	0	27	99	71774	71846	1e-34	135
HWI-ST942:56:C4CFMACXX:7:2110:16529:153441	95.83	48	1	1	1	48	95566	95612	8e-17	76.8
HWI-ST942:56:C4CFMACXX:7:2110:16529:153441	100.00	71	0	0	30	100	94206	94276	2e-33	132
HWI-ST942:56:C4CFMACXX:7:2110:17046:91782	100.00	30	0	0	1	30	54254	54225	1e-10	56.5
HWI-ST942:56:C4CFMACXX:7:2110:17046:91782	100.00	72	0	0	29	100	27680	27609	5e-34	134
HWI-ST942:56:C4CFMACXX:7:2110:19166:175682	100.00	58	0	0	1	58	28628	28685	3e-26	108
HWI-ST942:56:C4CFMACXX:7:2110:19166:175682	96.30	54	2	0	46	99	99380	99327	1e-20	89.8
HWI-ST942:56:C4CFMACXX:7:2110:19599:563382	100.00	86	0	0	1	86	93485	93400	8e-42	159
HWI-ST942:56:C4CFMACXX:7:2110:19599:563382	100.00	22	0	0	79	100	84655	84634	3e-06	41.7
HWI-ST942:56:C4CFMACXX:7:2110:4977:254842	98.33	60	1	0	1	60	84155	84096	1e-25	106
HWI-ST942:56:C4CFMACXX:7:2110:4977:254842	97.78	45	1	0	56	100	84044	84088	2e-17	78.7
HWI-ST942:56:C4CFMACXX:7:2110:8773:621742	93.44	61	2	2	5	64	27238	27179	1e-20	89.8
HWI-ST942:56:C4CFMACXX:7:2110:8773:621742	100.00	54	0	0	46	99	27179	27232	5e-24	100
HWI-ST942:56:C4CFMACXX:7:2111:10367:824281	100.00	78	0	0	1	78	27683	27606	2e-37	145
HWI-ST942:56:C4CFMACXX:7:2111:10367:824281	100.00	23	0	0	78	100	39887	39909	8e-07	43.6
HWI-ST942:56:C4CFMACXX:7:2111:14601:116601	100.00	83	0	0	1	83	124931	125013	4e-40	154
HWI-ST942:56:C4CFMACXX:7:2111:14601:116601	100.00	20	0	0	81	100	101617	101598	4e-05	38.1
HWI-ST942:56:C4CFMACXX:7:2111:14689:660331	100.00	79	0	0	1	79	61601	61679	6e-38	147
HWI-ST942:56:C4CFMACXX:7:2111:14689:660331	100.00	22	0	0	79	100	17131	17110	3e-06	41.7
HWI-ST942:56:C4CFMACXX:7:2111:16994:55432	100.00	41	0	0	1	41	12870	12910	8e-17	76.8
HWI-ST942:56:C4CFMACXX:7:2111:16994:55432	100.00	62	0	0	38	99	12932	12871	2e-28	115
HWI-ST942:56:C4CFMACXX:7:2111:20521:917711	100.00	82	0	0	1	82	5515	5596	1e-39	152
HWI-ST942:56:C4CFMACXX:7:2111:20521:917711	100.00	24	0	0	75	98	125520	125543	2e-07	45.4
HWI-ST942:56:C4CFMACXX:7:2111:20521:917712	100.00	24	0	0	1	24	125543	125520	2e-07	45.4
HWI-ST942:56:C4CFMACXX:7:2111:20521:917712	100.00	82	0	0	17	98	5596	5515	1e-39	152
HWI-ST942:56:C4CFMACXX:7:2112:11630:109511	100.00	24	0	0	1	24	33673	33650	2e-07	45.4
HWI-ST942:56:C4CFMACXX:7:2112:11630:109511	96.63	89	1	2	13	100	117534	117621	6e-38	147
HWI-ST942:56:C4CFMACXX:7:2112:13852:764441	100.00	75	0	0	1	75	104715	104641	1e-35	139
HWI-ST942:56:C4CFMACXX:7:2112:13852:764441	96.55	29	1	0	72	100	95364	95336	2e-08	49.1
HWI-ST942:56:C4CFMACXX:7:2112:16055:741672	100.00	66	0	0	1	66	102635	102570	1e-30	122
HWI-ST942:56:C4CFMACXX:7:2112:16055:741672	100.00	37	0	0	64	100	82887	82923	1e-14	69.4
HWI-ST942:56:C4CFMACXX:7:2112:2880:336391	100.00	88	0	0	1	88	12241	12154	6e-43	163
HWI-ST942:56:C4CFMACXX:7:2112:2880:336391	96.00	25	1	0	76	100	91003	91027	3e-06	41.7
HWI-ST942:56:C4CFMACXX:7:2112:2880:336392	98.46	65	1	0	1	65	91067	91003	2e-28	115
HWI-ST942:56:C4CFMACXX:7:2112:2880:336392	100.00	47	0	0	53	99	12154	12200	4e-20	87.9
HWI-ST942:56:C4CFMACXX:7:2112:2946:677882	94.64	56	3	0	1	56	63047	62992	4e-20	87.9
HWI-ST942:56:C4CFMACXX:7:2112:2946:677882	98.04	51	1	0	50	100	52406	52456	1e-20	89.8
HWI-ST942:56:C4CFMACXX:7:2112:6520:647222	100.00	35	0	0	1	35	81318	81352	2e-13	65.8
HWI-ST942:56:C4CFMACXX:7:2112:6520:647222	100.00	66	0	0	34	99	81381	81316	1e-30	122
HWI-ST942:56:C4CFMACXX:7:2112:8274:672132	100.00	80	0	0	1	80	1805	1884	2e-38	148
HWI-ST942:56:C4CFMACXX:7:2112:8274:672132	100.00	22	0	0	79	100	112131	112152	3e-06	41.7
HWI-ST942:56:C4CFMACXX:7:2112:8376:201602	100.00	25	0	0	1	25	107663	107639	6e-08	47.3
HWI-ST942:56:C4CFMACXX:7:2112:8376:201602	100.00	79	0	0	22	100	107538	107616	6e-38	147
HWI-ST942:56:C4CFMACXX:7:2112:9428:463672	100.00	38	0	0	1	38	46568	46605	4e-15	71.3
HWI-ST942:56:C4CFMACXX:7:2112:9428:463672	98.57	70	1	0	31	100	46622	46553	3e-31	124
HWI-ST942:56:C4CFMACXX:7:2113:12569:466231	100.00	63	0	0	1	63	69383	69445	5e-29	117
HWI-ST942:56:C4CFMACXX:7:2113:12569:466231	100.00	39	0	0	62	100	112084	112122	1e-15	73.1
HWI-ST942:56:C4CFMACXX:7:2113:14202:750352	97.78	45	0	1	1	45	39600	39557	8e-17	76.8
HWI-ST942:56:C4CFMACXX:7:2113:14202:750352	100.00	67	0	0	34	100	46129	46063	3e-31	124
HWI-ST942:56:C4CFMACXX:7:2113:16378:249982	90.91	33	3	0	1	33	127593	127625	2e-07	45.4
HWI-ST942:56:C4CFMACXX:7:2113:16378:249982	100.00	83	0	0	18	100	127845	127927	4e-40	154
HWI-ST942:56:C4CFMACXX:7:2113:20428:298112	97.06	68	0	1	1	68	110496	110431	6e-28	113
HWI-ST942:56:C4CFMACXX:7:2113:20428:298112	100.00	21	0	0	65	85	128193	128213	1e-05	39.9
HWI-ST942:56:C4CFMACXX:7:2113:21195:385082	100.00	43	0	0	1	43	91695	91737	6e-18	80.5
HWI-ST942:56:C4CFMACXX:7:2113:21195:385082	100.00	62	0	0	38	99	91754	91693	2e-28	115
HWI-ST942:56:C4CFMACXX:7:2113:2173:844002	100.00	37	0	0	1	37	89840	89876	1e-14	69.4
HWI-ST942:56:C4CFMACXX:7:2113:2173:844002	98.36	61	0	1	35	94	87749	87809	1e-25	106
HWI-ST942:56:C4CFMACXX:7:2113:2586:601201	87.04	54	6	1	1	53	103498	103445	8e-12	60.2
HWI-ST942:56:C4CFMACXX:7:2113:2586:601201	100.00	89	0	0	12	100	104430	104342	2e-43	165
HWI-ST942:56:C4CFMACXX:7:2113:5444:525801	100.00	66	0	0	1	66	49951	49886	1e-30	122
HWI-ST942:56:C4CFMACXX:7:2113:5444:525801	100.00	37	0	0	64	100	49992	49956	1e-14	69.4
HWI-ST942:56:C4CFMACXX:7:2113:5838:435061	100.00	81	0	0	1	81	89558	89638	5e-39	150
HWI-ST942:56:C4CFMACXX:7:2113:5838:435061	100.00	21	0	0	80	100	8477	8457	1e-05	39.9
HWI-ST942:56:C4CFMACXX:7:2114:12344:439901	97.59	83	1	1	1	82	59691	59773	3e-36	141
HWI-ST942:56:C4CFMACXX:7:2114:12344:439901	100.00	20	0	0	80	99	76213	76232	4e-05	38.1
HWI-ST942:56:C4CFMACXX:7:2114:13306:200581	100.00	72	0	0	1	72	26929	27000	5e-34	134
HWI-ST942:56:C4CFMACXX:7:2114:13306:200581	100.00	29	0	0	71	99	85462	85490	4e-10	54.7
HWI-ST942:56:C4CFMACXX:7:2114:13843:432411	100.00	69	0	0	1	69	99888	99820	2e-32	128
HWI-ST942:56:C4CFMACXX:7:2114:13843:432411	100.00	33	0	0	68	100	82363	82395	2e-12	62.1
HWI-ST942:56:C4CFMACXX:7:2114:14571:722022	100.00	26	0	0	1	26	98224	98249	2e-08	49.1
HWI-ST942:56:C4CFMACXX:7:2114:14571:722022	100.00	79	0	0	21	99	98282	98204	6e-38	147
HWI-ST942:56:C4CFMACXX:7:2114:16074:972271	100.00	52	0	0	1	52	96580	96631	6e-23	97.1
HWI-ST942:56:C4CFMACXX:7:2114:16074:972271	97.62	42	1	0	59	100	88817	88858	1e-15	73.1
HWI-ST942:56:C4CFMACXX:7:2114:16074:972272	98.25	57	1	0	1	57	88873	88817	5e-24	100
HWI-ST942:56:C4CFMACXX:7:2114:16074:972272	100.00	37	0	0	64	100	96631	96595	1e-14	69.4
HWI-ST942:56:C4CFMACXX:7:2114:16658:805442	98.25	57	1	0	1	57	71365	71309	5e-24	100
HWI-ST942:56:C4CFMACXX:7:2114:16658:805442	100.00	52	0	0	49	100	71456	71405	6e-23	97.1
HWI-ST942:56:C4CFMACXX:7:2114:19195:237682	97.14	35	1	0	1	35	35914	35880	8e-12	60.2
HWI-ST942:56:C4CFMACXX:7:2114:19195:237682	100.00	72	0	0	28	99	35859	35930	5e-34	134
HWI-ST942:56:C4CFMACXX:7:2114:4290:252592	96.83	63	1	1	1	63	14501	14440	4e-25	104
HWI-ST942:56:C4CFMACXX:7:2114:4290:252592	100.00	59	0	0	41	99	4542	4484	8e-27	110
HWI-ST942:56:C4CFMACXX:7:2114:7047:438501	100.00	48	0	0	1	48	28016	27969	1e-20	89.8
HWI-ST942:56:C4CFMACXX:7:2114:7047:438501	100.00	52	0	0	49	100	127632	127581	6e-23	97.1
HWI-ST942:56:C4CFMACXX:7:2114:8424:463242	100.00	40	0	0	1	40	80307	80346	3e-16	75.0
HWI-ST942:56:C4CFMACXX:7:2114:8424:463242	97.14	70	1	1	31	99	80317	80248	5e-29	117
HWI-ST942:56:C4CFMACXX:7:2114:9536:578232	97.30	37	1	0	1	37	116509	116473	6e-13	63.9
HWI-ST942:56:C4CFMACXX:7:2114:9536:578232	100.00	69	0	0	32	100	116426	116494	2e-32	128
HWI-ST942:56:C4CFMACXX:7:2115:13913:300852	94.34	53	3	0	1	53	106645	106593	2e-18	82.4
HWI-ST942:56:C4CFMACXX:7:2115:13913:300852	95.65	23	1	0	78	100	106555	106533	4e-05	38.1
HWI-ST942:56:C4CFMACXX:7:2115:16485:564132	96.00	25	1	0	1	25	111092	111068	3e-06	41.7
HWI-ST942:56:C4CFMACXX:7:2115:16485:564132	100.00	82	0	0	19	100	111050	111131	1e-39	152
HWI-ST942:56:C4CFMACXX:7:2115:17369:342902	95.77	71	2	1	1	71	32305	32236	6e-28	113
HWI-ST942:56:C4CFMACXX:7:2115:17369:342902	100.00	48	0	0	53	100	54509	54556	1e-20	89.8
HWI-ST942:56:C4CFMACXX:7:2115:2274:776002	96.20	79	3	0	1	79	30661	30739	6e-33	130
HWI-ST942:56:C4CFMACXX:7:2115:2274:776002	100.00	28	0	0	69	96	30757	30730	1e-09	52.8
HWI-ST942:56:C4CFMACXX:7:2115:5556:575962	100.00	25	0	0	1	25	124724	124700	6e-08	47.3
HWI-ST942:56:C4CFMACXX:7:2115:5556:575962	100.00	76	0	0	21	96	124670	124745	3e-36	141
HWI-ST942:56:C4CFMACXX:7:2115:7871:727172	94.83	58	1	2	1	56	59413	59470	1e-20	89.8
HWI-ST942:56:C4CFMACXX:7:2115:7871:727172	96.67	60	2	0	41	100	59335	59394	5e-24	100
HWI-ST942:56:C4CFMACXX:7:2116:13496:929881	100.00	24	0	0	1	24	18646	18669	2e-07	45.4
HWI-ST942:56:C4CFMACXX:7:2116:13496:929881	100.00	58	0	0	14	71	85879	85936	2e-26	108
HWI-ST942:56:C4CFMACXX:7:2116:13496:929882	100.00	58	0	0	1	58	85936	85879	2e-26	108
HWI-ST942:56:C4CFMACXX:7:2116:13496:929882	100.00	24	0	0	48	71	18669	18646	2e-07	45.4
HWI-ST942:56:C4CFMACXX:7:2116:13668:201312	100.00	53	0	0	1	53	89247	89195	2e-23	99.0
HWI-ST942:56:C4CFMACXX:7:2116:13668:201312	100.00	47	0	0	54	100	49935	49981	4e-20	87.9
HWI-ST942:56:C4CFMACXX:7:2116:13800:923282	97.56	41	1	0	1	41	84975	84935	4e-15	71.3
HWI-ST942:56:C4CFMACXX:7:2116:13800:923282	97.10	69	2	0	32	100	84903	84971	5e-29	117
HWI-ST942:56:C4CFMACXX:7:2116:16406:921371	98.57	70	1	0	1	70	14943	14874	3e-31	124
HWI-ST942:56:C4CFMACXX:7:2116:16406:921371	100.00	31	0	0	70	100	12686	12656	3e-11	58.4
HWI-ST942:56:C4CFMACXX:7:2116:17651:790502	94.64	56	3	0	1	56	90567	90622	4e-20	87.9
HWI-ST942:56:C4CFMACXX:7:2116:17651:790502	100.00	56	0	0	45	100	90714	90659	4e-25	104
HWI-ST942:56:C4CFMACXX:7:2116:18233:38631	100.00	74	0	0	1	74	112159	112086	4e-35	137
HWI-ST942:56:C4CFMACXX:7:2116:18233:38631	100.00	30	0	0	71	100	97121	97150	1e-10	56.5
HWI-ST942:56:C4CFMACXX:7:2116:18233:38632	98.67	75	1	0	1	75	97195	97121	5e-34	134
HWI-ST942:56:C4CFMACXX:7:2116:18233:38632	100.00	28	0	0	72	99	112086	112113	1e-09	52.8
HWI-ST942:56:C4CFMACXX:7:2116:18937:25332	95.71	70	3	0	1	70	117799	117730	6e-28	113
HWI-ST942:56:C4CFMACXX:7:2116:18937:25332	100.00	40	0	0	57	96	117687	117726	3e-16	75.0
HWI-ST942:56:C4CFMACXX:7:2116:3047:106502	96.30	27	1	0	1	27	100567	100541	2e-07	45.4
HWI-ST942:56:C4CFMACXX:7:2116:3047:106502	97.50	80	2	0	20	99	100528	100607	4e-35	137
HWI-ST942:56:C4CFMACXX:7:2116:4334:417031	100.00	67	0	0	1	67	75355	75289	3e-31	124
HWI-ST942:56:C4CFMACXX:7:2116:4334:417031	96.00	50	1	1	51	100	4404	4356	6e-18	80.5
HWI-ST942:56:C4CFMACXX:7:2116:4334:417032	95.24	63	2	1	1	63	4343	4404	2e-23	99.0
HWI-ST942:56:C4CFMACXX:7:2116:4334:417032	100.00	54	0	0	47	100	75289	75342	5e-24	100
HWI-ST942:56:C4CFMACXX:7:2116:6517:767852	90.79	76	7	0	1	76	103557	103482	1e-24	102
HWI-ST942:56:C4CFMACXX:7:2116:6517:767852	100.00	50	0	0	50	99	103481	103530	8e-22	93.5
HWI-ST942:56:C4CFMACXX:7:2116:7571:374301	100.00	75	0	0	1	75	28253	28179	1e-35	139
HWI-ST942:56:C4CFMACXX:7:2116:7571:374301	100.00	27	0	0	74	100	98801	98827	5e-09	51.0
HWI-ST942:56:C4CFMACXX:7:2201:10914:429402	96.30	27	1	0	1	27	104844	104818	2e-07	45.4
HWI-ST942:56:C4CFMACXX:7:2201:10914:429402	100.00	79	0	0	19	97	104773	104851	6e-38	147
HWI-ST942:56:C4CFMACXX:7:2201:13250:190292	100.00	67	0	0	1	67	120830	120764	3e-31	124
HWI-ST942:56:C4CFMACXX:7:2201:13250:190292	100.00	35	0	0	65	99	87659	87625	2e-13	65.8
HWI-ST942:56:C4CFMACXX:7:2201:15693:782802	100.00	34	0	0	1	34	56222	56255	6e-13	63.9
HWI-ST942:56:C4CFMACXX:7:2201:15693:782802	100.00	72	0	0	28	99	91485	91414	5e-34	134
HWI-ST942:56:C4CFMACXX:7:2201:17200:268662	93.75	32	2	0	1	32	47811	47780	2e-08	49.1
HWI-ST942:56:C4CFMACXX:7:2201:17200:268662	100.00	77	0	0	21	97	47637	47713	7e-37	143
HWI-ST942:56:C4CFMACXX:7:2201:5606:250812	97.30	37	1	0	1	37	93848	93884	6e-13	63.9
HWI-ST942:56:C4CFMACXX:7:2201:5606:250812	100.00	69	0	0	32	100	93910	93842	2e-32	128
HWI-ST942:56:C4CFMACXX:7:2201:9972:937182	98.28	58	0	1	1	58	124778	124722	5e-24	100
HWI-ST942:56:C4CFMACXX:7:2201:9972:937182	100.00	53	0	0	48	100	115178	115126	2e-23	99.0
HWI-ST942:56:C4CFMACXX:7:2202:3219:720442	81.25	80	9	6	1	77	40807	40883	8e-12	60.2
HWI-ST942:56:C4CFMACXX:7:2202:3219:720442	97.59	83	1	1	18	100	40897	40816	3e-36	141
HWI-ST942:56:C4CFMACXX:7:2202:4880:539662	100.00	27	0	0	1	27	118934	118960	5e-09	51.0
HWI-ST942:56:C4CFMACXX:7:2202:4880:539662	100.00	79	0	0	22	100	119006	118928	6e-38	147
HWI-ST942:56:C4CFMACXX:7:2202:5686:955642	100.00	28	0	0	1	28	38171	38144	1e-09	52.8
HWI-ST942:56:C4CFMACXX:7:2202:5686:955642	100.00	73	0	0	27	99	125718	125790	1e-34	135
HWI-ST942:56:C4CFMACXX:7:2202:8946:115232	100.00	36	0	0	1	36	18523	18488	5e-14	67.6
HWI-ST942:56:C4CFMACXX:7:2202:8946:115232	100.00	68	0	0	31	98	18462	18529	8e-32	126
HWI-ST942:56:C4CFMACXX:7:2203:12260:380492	100.00	34	0	0	1	34	11291	11324	6e-13	63.9
HWI-ST942:56:C4CFMACXX:7:2203:12260:380492	97.26	73	2	0	28	100	11367	11295	3e-31	124
HWI-ST942:56:C4CFMACXX:7:2203:12291:209142	100.00	69	0	0	1	69	80862	80930	2e-32	128
HWI-ST942:56:C4CFMACXX:7:2203:12291:209142	100.00	32	0	0	69	100	58196	58165	8e-12	60.2
HWI-ST942:56:C4CFMACXX:7:2203:12519:125951	97.62	84	1	1	1	83	11401	11318	8e-37	143
HWI-ST942:56:C4CFMACXX:7:2203:12519:125951	100.00	27	0	0	74	100	112500	112474	5e-09	51.0
HWI-ST942:56:C4CFMACXX:7:2203:14154:915642	100.00	25	0	0	1	25	89819	89843	6e-08	47.3
HWI-ST942:56:C4CFMACXX:7:2203:14154:915642	100.00	79	0	0	22	100	89928	89850	6e-38	147
HWI-ST942:56:C4CFMACXX:7:2203:15999:279402	100.00	42	0	0	1	42	90027	89986	2e-17	78.7
HWI-ST942:56:C4CFMACXX:7:2203:15999:279402	98.46	65	1	0	36	100	89965	90029	2e-28	115
HWI-ST942:56:C4CFMACXX:7:2203:3614:574812	100.00	46	0	0	1	46	75518	75563	1e-19	86.1
HWI-ST942:56:C4CFMACXX:7:2203:3614:574812	96.55	58	2	0	43	100	14039	13982	6e-23	97.1
HWI-ST942:56:C4CFMACXX:7:2203:5326:321531	98.68	76	0	1	1	75	88172	88097	5e-34	134
HWI-ST942:56:C4CFMACXX:7:2203:5326:321531	100.00	33	0	0	68	100	91824	91856	2e-12	62.1
HWI-ST942:56:C4CFMACXX:7:2203:6608:389431	100.00	70	0	0	1	70	553	622	6e-33	130
HWI-ST942:56:C4CFMACXX:7:2203:6608:389431	100.00	32	0	0	69	100	77884	77853	8e-12	60.2
HWI-ST942:56:C4CFMACXX:7:2203:8426:645862	100.00	31	0	0	1	31	117291	117321	3e-11	58.4
HWI-ST942:56:C4CFMACXX:7:2203:8426:645862	100.00	68	0	0	29	96	117452	117385	7e-32	126
HWI-ST942:56:C4CFMACXX:7:2204:11794:804152	100.00	72	0	0	1	72	54817	54888	5e-34	134
HWI-ST942:56:C4CFMACXX:7:2204:11794:804152	100.00	31	0	0	70	100	49213	49183	3e-11	58.4
HWI-ST942:56:C4CFMACXX:7:2204:13968:540012	91.67	60	4	1	1	60	100544	100602	2e-18	82.4
HWI-ST942:56:C4CFMACXX:7:2204:13968:540012	100.00	60	0	0	41	100	100605	100546	2e-27	111
HWI-ST942:56:C4CFMACXX:7:2204:14281:488682	100.00	44	0	0	1	44	110411	110368	2e-18	82.4
HWI-ST942:56:C4CFMACXX:7:2204:14281:488682	96.15	26	1	0	75	100	110337	110312	8e-07	43.6
HWI-ST942:56:C4CFMACXX:7:2204:14918:819702	97.14	35	1	0	1	35	53081	53047	8e-12	60.2
HWI-ST942:56:C4CFMACXX:7:2204:14918:819702	100.00	72	0	0	29	100	52996	53067	5e-34	134
HWI-ST942:56:C4CFMACXX:7:2204:15164:817052	100.00	37	0	0	1	37	104979	104943	1e-14	69.4
HWI-ST942:56:C4CFMACXX:7:2204:15164:817052	100.00	66	0	0	34	99	54501	54566	1e-30	122
HWI-ST942:56:C4CFMACXX:7:2204:15796:400852	100.00	73	0	0	1	73	120653	120581	1e-34	135
HWI-ST942:56:C4CFMACXX:7:2204:15796:400852	100.00	27	0	0	70	96	40916	40890	5e-09	51.0
HWI-ST942:56:C4CFMACXX:7:2204:18070:422121	100.00	81	0	0	1	81	18390	18470	5e-39	150
HWI-ST942:56:C4CFMACXX:7:2204:18070:422121	100.00	22	0	0	79	100	106140	106161	3e-06	41.7
HWI-ST942:56:C4CFMACXX:7:2204:19227:949261	100.00	69	0	0	1	69	65124	65056	2e-32	128
HWI-ST942:56:C4CFMACXX:7:2204:19227:949261	100.00	32	0	0	68	99	18153	18122	8e-12	60.2
HWI-ST942:56:C4CFMACXX:7:2204:19249:768782	100.00	65	0	0	1	65	123760	123696	4e-30	121
HWI-ST942:56:C4CFMACXX:7:2204:19249:768782	100.00	48	0	0	52	99	123696	123743	1e-20	89.8
HWI-ST942:56:C4CFMACXX:7:2204:19554:671261	100.00	78	0	0	1	78	54712	54789	2e-37	145
HWI-ST942:56:C4CFMACXX:7:2204:19554:671261	93.75	32	1	1	69	100	39830	39800	6e-08	47.3
HWI-ST942:56:C4CFMACXX:7:2204:19691:38682	100.00	48	0	0	1	48	90707	90660	1e-20	89.8
HWI-ST942:56:C4CFMACXX:7:2204:19691:38682	100.00	49	0	0	45	93	90630	90678	3e-21	91.6
HWI-ST942:56:C4CFMACXX:7:2204:20837:500232	100.00	45	0	0	1	45	85933	85977	5e-19	84.2
HWI-ST942:56:C4CFMACXX:7:2204:20837:500232	100.00	63	0	0	37	99	52774	52712	5e-29	117
HWI-ST942:56:C4CFMACXX:7:2204:20865:689792	90.74	54	4	1	1	54	100550	100602	4e-15	71.3
HWI-ST942:56:C4CFMACXX:7:2204:20865:689792	100.00	66	0	0	35	100	100605	100540	1e-30	122
HWI-ST942:56:C4CFMACXX:7:2204:20925:442262	100.00	39	0	0	1	39	39	1	1e-15	73.1
HWI-ST942:56:C4CFMACXX:7:2204:20925:442262	100.00	61	0	0	40	100	84171	84231	6e-28	113
HWI-ST942:56:C4CFMACXX:7:2204:2238:914541	100.00	82	0	0	1	82	106084	106165	1e-39	152
HWI-ST942:56:C4CFMACXX:7:2204:2238:914541	100.00	22	0	0	79	100	74968	74989	3e-06	41.7
HWI-ST942:56:C4CFMACXX:7:2204:6502:691462	100.00	29	0	0	1	29	127127	127155	4e-10	54.7
HWI-ST942:56:C4CFMACXX:7:2204:6502:691462	100.00	75	0	0	22	96	127178	127104	1e-35	139
HWI-ST942:56:C4CFMACXX:7:2205:10765:495592	100.00	70	0	0	1	70	58161	58092	6e-33	130
HWI-ST942:56:C4CFMACXX:7:2205:10765:495592	100.00	29	0	0	70	98	98312	98340	4e-10	54.7
HWI-ST942:56:C4CFMACXX:7:2205:9721:291112	100.00	44	0	0	1	44	61330	61287	2e-18	82.4
HWI-ST942:56:C4CFMACXX:7:2205:9721:291112	98.59	71	1	0	26	96	61287	61357	7e-32	126
HWI-ST942:56:C4CFMACXX:7:2206:10542:193011	100.00	54	0	0	1	54	107226	107173	5e-24	100
HWI-ST942:56:C4CFMACXX:7:2206:10542:193011	100.00	44	0	0	55	98	42343	42386	2e-18	82.4
HWI-ST942:56:C4CFMACXX:7:2206:1786:910691	100.00	45	0	0	1	45	22050	22006	5e-19	84.2
HWI-ST942:56:C4CFMACXX:7:2206:1786:910691	97.01	67	2	0	34	100	20153	20219	6e-28	113
HWI-ST942:56:C4CFMACXX:7:2206:18642:998292	96.00	25	1	0	1	25	61872	61896	3e-06	41.7
HWI-ST942:56:C4CFMACXX:7:2206:18642:998292	100.00	77	0	0	20	96	61915	61839	7e-37	143
HWI-ST942:56:C4CFMACXX:7:2206:4582:950912	100.00	71	0	0	1	71	83242	83172	2e-33	132
HWI-ST942:56:C4CFMACXX:7:2206:4582:950912	100.00	29	0	0	72	100	108738	108766	4e-10	54.7
HWI-ST942:56:C4CFMACXX:7:2206:6349:695132	100.00	31	0	0	1	31	115913	115943	3e-11	58.4
HWI-ST942:56:C4CFMACXX:7:2206:6349:695132	100.00	77	0	0	24	100	116050	115974	8e-37	143
HWI-ST942:56:C4CFMACXX:7:2206:8062:630202	100.00	56	0	0	1	56	74193	74248	4e-25	104
HWI-ST942:56:C4CFMACXX:7:2206:8062:630202	100.00	86	0	0	13	98	74248	74163	8e-42	159
HWI-ST942:56:C4CFMACXX:7:2206:8635:465822	100.00	65	0	0	1	65	104786	104850	4e-30	121
HWI-ST942:56:C4CFMACXX:7:2206:8635:465822	100.00	34	0	0	66	99	76274	76241	6e-13	63.9
HWI-ST942:56:C4CFMACXX:7:2206:9013:680241	100.00	79	0	0	1	79	65626	65704	6e-38	147
HWI-ST942:56:C4CFMACXX:7:2206:9013:680241	100.00	21	0	0	80	100	102600	102620	1e-05	39.9
HWI-ST942:56:C4CFMACXX:7:2207:10884:703051	100.00	24	0	0	1	24	64916	64939	2e-07	45.4
HWI-ST942:56:C4CFMACXX:7:2207:10884:703051	100.00	57	0	0	25	81	64883	64939	8e-26	106
HWI-ST942:56:C4CFMACXX:7:2207:10884:703052	100.00	57	0	0	1	57	64939	64883	8e-26	106
HWI-ST942:56:C4CFMACXX:7:2207:10884:703052	100.00	24	0	0	58	81	64939	64916	2e-07	45.4
HWI-ST942:56:C4CFMACXX:7:2207:10893:738461	100.00	63	0	0	1	63	113054	112992	5e-29	117
HWI-ST942:56:C4CFMACXX:7:2207:10893:738461	95.56	45	2	0	56	100	99696	99740	1e-15	73.1
HWI-ST942:56:C4CFMACXX:7:2207:10893:738462	98.18	55	1	0	1	55	99750	99696	6e-23	97.1
HWI-ST942:56:C4CFMACXX:7:2207:10893:738462	100.00	53	0	0	48	100	112992	113044	2e-23	99.0
HWI-ST942:56:C4CFMACXX:7:2207:19422:861331	96.70	91	2	1	1	91	6926	6837	5e-39	150
HWI-ST942:56:C4CFMACXX:7:2207:19422:861331	81.63	49	7	2	54	100	115055	115103	1e-05	39.9
HWI-ST942:56:C4CFMACXX:7:2207:19963:88061	100.00	79	0	0	1	79	40033	39955	6e-38	147
HWI-ST942:56:C4CFMACXX:7:2207:19963:88061	100.00	23	0	0	78	100	76950	76928	8e-07	43.6
HWI-ST942:56:C4CFMACXX:7:2207:2681:862042	97.06	34	1	0	1	34	18090	18057	3e-11	58.4
HWI-ST942:56:C4CFMACXX:7:2207:2681:862042	100.00	73	0	0	28	100	18031	18103	1e-34	135
HWI-ST942:56:C4CFMACXX:7:2207:3409:160872	100.00	75	0	0	1	75	22567	22493	1e-35	139
HWI-ST942:56:C4CFMACXX:7:2207:3409:160872	100.00	28	0	0	73	100	55312	55285	1e-09	52.8
HWI-ST942:56:C4CFMACXX:7:2207:5376:116401	100.00	78	0	0	1	78	100998	100921	2e-37	145
HWI-ST942:56:C4CFMACXX:7:2207:5376:116401	100.00	30	0	0	71	100	100904	100933	1e-10	56.5
HWI-ST942:56:C4CFMACXX:7:2207:5376:116402	100.00	50	0	0	1	50	100953	100904	8e-22	93.5
HWI-ST942:56:C4CFMACXX:7:2207:5376:116402	100.00	58	0	0	43	100	100921	100978	3e-26	108
HWI-ST942:56:C4CFMACXX:7:2207:7136:86012	100.00	82	0	0	1	82	65433	65514	1e-39	152
HWI-ST942:56:C4CFMACXX:7:2207:7136:86012	100.00	20	0	0	81	100	19877	19858	4e-05	38.1
HWI-ST942:56:C4CFMACXX:7:2208:10279:934702	100.00	71	0	0	1	71	21296	21226	2e-33	132
HWI-ST942:56:C4CFMACXX:7:2208:10279:934702	100.00	32	0	0	69	100	21565	21534	8e-12	60.2
HWI-ST942:56:C4CFMACXX:7:2208:12245:634761	100.00	77	0	0	1	77	61217	61141	8e-37	143
HWI-ST942:56:C4CFMACXX:7:2208:12245:634761	100.00	27	0	0	74	100	47576	47602	5e-09	51.0
HWI-ST942:56:C4CFMACXX:7:2208:17311:950592	97.50	40	1	0	1	40	64907	64946	1e-14	69.4
HWI-ST942:56:C4CFMACXX:7:2208:17311:950592	100.00	65	0	0	36	100	64960	64896	4e-30	121
HWI-ST942:56:C4CFMACXX:7:2208:19025:891712	94.59	37	2	0	1	37	59884	59848	3e-11	58.4
HWI-ST942:56:C4CFMACXX:7:2208:19025:891712	100.00	76	0	0	25	100	59744	59819	3e-36	141
HWI-ST942:56:C4CFMACXX:7:2208:19306:493451	100.00	59	0	0	1	59	30142	30084	8e-27	110
HWI-ST942:56:C4CFMACXX:7:2208:19306:493451	100.00	43	0	0	57	99	75840	75882	6e-18	80.5
HWI-ST942:56:C4CFMACXX:7:2208:20438:775992	96.77	31	1	0	1	31	85302	85332	1e-09	52.8
HWI-ST942:56:C4CFMACXX:7:2208:20438:775992	100.00	76	0	0	24	99	85359	85284	3e-36	141
HWI-ST942:56:C4CFMACXX:7:2208:4720:501212	95.56	45	2	0	1	45	99981	100025	1e-15	73.1
HWI-ST942:56:C4CFMACXX:7:2208:4720:501212	98.57	70	1	0	31	100	100349	100280	3e-31	124
HWI-ST942:56:C4CFMACXX:7:2208:6190:191131	100.00	85	0	0	1	85	32762	32846	3e-41	158
HWI-ST942:56:C4CFMACXX:7:2208:6190:191131	95.83	24	0	1	78	100	33070	33093	4e-05	38.1
HWI-ST942:56:C4CFMACXX:7:2208:6648:555522	94.44	72	3	1	1	72	122957	122887	8e-27	110
HWI-ST942:56:C4CFMACXX:7:2208:6648:555522	100.00	50	0	0	50	99	122829	122878	8e-22	93.5
HWI-ST942:56:C4CFMACXX:7:2208:9209:251972	96.43	28	1	0	1	28	103743	103770	6e-08	47.3
HWI-ST942:56:C4CFMACXX:7:2208:9209:251972	100.00	78	0	0	23	100	103885	103808	2e-37	145
HWI-ST942:56:C4CFMACXX:7:2209:11578:24081	100.00	79	0	0	1	79	85571	85649	6e-38	147
HWI-ST942:56:C4CFMACXX:7:2209:11578:24081	100.00	29	0	0	72	100	37173	37145	4e-10	54.7
HWI-ST942:56:C4CFMACXX:7:2209:11906:874851	100.00	78	0	0	1	78	119786	119863	2e-37	145
HWI-ST942:56:C4CFMACXX:7:2209:11906:874851	100.00	23	0	0	77	99	1956	1934	8e-07	43.6
HWI-ST942:56:C4CFMACXX:7:2209:12600:875042	98.86	88	1	0	1	88	46746	46659	3e-41	158
HWI-ST942:56:C4CFMACXX:7:2209:12600:875042	100.00	20	0	0	81	100	14109	14090	4e-05	38.1
HWI-ST942:56:C4CFMACXX:7:2209:19959:787471	100.00	53	0	0	1	53	97374	97426	1e-23	99.0
HWI-ST942:56:C4CFMACXX:7:2209:19959:787471	96.55	29	0	1	42	69	86948	86920	4e-08	47.3
HWI-ST942:56:C4CFMACXX:7:2209:19959:787472	96.43	28	0	1	1	27	86921	86948	1e-07	45.4
HWI-ST942:56:C4CFMACXX:7:2209:19959:787472	100.00	53	0	0	16	68	97426	97374	1e-23	99.0
HWI-ST942:56:C4CFMACXX:7:2209:21212:935602	100.00	77	0	0	1	77	3411	3487	8e-37	143
HWI-ST942:56:C4CFMACXX:7:2209:21212:935602	100.00	24	0	0	77	100	51893	51916	2e-07	45.4
HWI-ST942:56:C4CFMACXX:7:2210:13755:310272	100.00	71	0	0	1	71	112778	112708	2e-33	132
HWI-ST942:56:C4CFMACXX:7:2210:13755:310272	100.00	40	0	0	61	100	82466	82427	3e-16	75.0
HWI-ST942:56:C4CFMACXX:7:2210:14610:136212	95.74	47	2	0	1	47	51786	51832	8e-17	76.8
HWI-ST942:56:C4CFMACXX:7:2210:14610:136212	100.00	61	0	0	40	100	51851	51791	6e-28	113
HWI-ST942:56:C4CFMACXX:7:2210:16852:999922	98.80	83	1	0	1	83	127724	127642	2e-38	148
HWI-ST942:56:C4CFMACXX:7:2210:16852:999922	100.00	26	0	0	72	97	37334	37359	2e-08	49.1
HWI-ST942:56:C4CFMACXX:7:2210:19825:582112	100.00	26	0	0	1	26	96347	96372	2e-08	49.1
HWI-ST942:56:C4CFMACXX:7:2210:19825:582112	100.00	83	0	0	18	100	96484	96402	4e-40	154
HWI-ST942:56:C4CFMACXX:7:2210:20936:938811	100.00	70	0	0	1	70	97138	97207	6e-33	130
HWI-ST942:56:C4CFMACXX:7:2210:20936:938811	100.00	32	0	0	69	100	49219	49188	8e-12	60.2
HWI-ST942:56:C4CFMACXX:7:2210:3307:153811	100.00	40	0	0	1	40	109038	109077	2e-16	75.0
HWI-ST942:56:C4CFMACXX:7:2210:3307:153811	97.83	46	0	1	24	68	103689	103644	1e-17	78.7
HWI-ST942:56:C4CFMACXX:7:2210:3307:153812	97.83	46	0	1	1	45	103644	103689	1e-17	78.7
HWI-ST942:56:C4CFMACXX:7:2210:3307:153812	100.00	40	0	0	29	68	109077	109038	2e-16	75.0
HWI-ST942:56:C4CFMACXX:7:2210:3541:159692	93.10	29	2	0	1	29	77973	78001	8e-07	43.6
HWI-ST942:56:C4CFMACXX:7:2210:3541:159692	100.00	82	0	0	15	96	78025	77944	1e-39	152
HWI-ST942:56:C4CFMACXX:7:2210:3864:987632	100.00	70	0	0	1	70	84240	84171	6e-33	130
HWI-ST942:56:C4CFMACXX:7:2210:3864:987632	100.00	29	0	0	71	99	1	29	4e-10	54.7
HWI-ST942:56:C4CFMACXX:7:2210:4308:895722	100.00	46	0	0	1	46	79767	79722	1e-19	86.1
HWI-ST942:56:C4CFMACXX:7:2210:4308:895722	100.00	56	0	0	45	100	79819	79764	4e-25	104
HWI-ST942:56:C4CFMACXX:7:2210:6186:138832	100.00	40	0	0	1	40	41179	41218	3e-16	75.0
HWI-ST942:56:C4CFMACXX:7:2210:6186:138832	100.00	64	0	0	36	99	41246	41183	1e-29	119
HWI-ST942:56:C4CFMACXX:7:2210:7160:367191	84.48	58	2	6	1	53	76718	76773	5e-09	51.0
HWI-ST942:56:C4CFMACXX:7:2210:7160:367191	100.00	79	0	0	18	96	46672	46750	6e-38	147
HWI-ST942:56:C4CFMACXX:7:2211:12713:226652	100.00	35	0	0	1	35	128207	128173	2e-13	65.8
HWI-ST942:56:C4CFMACXX:7:2211:12713:226652	100.00	58	0	0	30	87	128156	128213	3e-26	108
HWI-ST942:56:C4CFMACXX:7:2211:16216:587192	97.96	49	1	0	1	49	59567	59519	1e-19	86.1
HWI-ST942:56:C4CFMACXX:7:2211:16216:587192	100.00	57	0	0	44	100	75095	75151	1e-25	106
HWI-ST942:56:C4CFMACXX:7:2211:18000:609272	100.00	27	0	0	1	27	96118	96092	5e-09	51.0
HWI-ST942:56:C4CFMACXX:7:2211:18000:609272	100.00	79	0	0	21	99	96009	96087	6e-38	147
HWI-ST942:56:C4CFMACXX:7:2211:20964:699072	96.05	76	2	1	1	75	3762	3837	1e-30	122
HWI-ST942:56:C4CFMACXX:7:2211:20964:699072	100.00	49	0	0	52	100	119467	119419	3e-21	91.6
HWI-ST942:56:C4CFMACXX:7:2211:5092:664742	100.00	44	0	0	1	44	58639	58682	2e-18	82.4
HWI-ST942:56:C4CFMACXX:7:2211:5092:664742	96.00	75	0	2	28	100	58729	58656	1e-29	119
HWI-ST942:56:C4CFMACXX:7:2211:5585:752591	100.00	60	0	0	1	60	48266	48325	2e-27	111
HWI-ST942:56:C4CFMACXX:7:2211:5585:752591	100.00	41	0	0	60	100	48247	48287	8e-17	76.8
HWI-ST942:56:C4CFMACXX:7:2211:5585:752592	100.00	51	0	0	1	51	48297	48247	2e-22	95.3
HWI-ST942:56:C4CFMACXX:7:2211:5585:752592	100.00	50	0	0	51	100	48325	48276	8e-22	93.5
HWI-ST942:56:C4CFMACXX:7:2211:6038:956092	100.00	78	0	0	1	78	26542	26465	2e-37	145
HWI-ST942:56:C4CFMACXX:7:2211:6038:956092	100.00	24	0	0	77	100	89456	89433	2e-07	45.4
HWI-ST942:56:C4CFMACXX:7:2211:9168:348232	97.44	39	1	0	1	39	88220	88182	5e-14	67.6
HWI-ST942:56:C4CFMACXX:7:2211:9168:348232	100.00	71	0	0	29	99	88137	88207	2e-33	132
HWI-ST942:56:C4CFMACXX:7:2212:10891:455081	100.00	78	0	0	1	78	73273	73350	2e-37	145
HWI-ST942:56:C4CFMACXX:7:2212:10891:455081	100.00	22	0	0	76	97	84835	84856	3e-06	41.7
HWI-ST942:56:C4CFMACXX:7:2212:12182:430201	100.00	80	0	0	1	80	864	943	2e-38	148
HWI-ST942:56:C4CFMACXX:7:2212:12182:430201	96.88	32	0	1	69	100	766	736	1e-09	52.8
HWI-ST942:56:C4CFMACXX:7:2212:12182:430202	97.22	36	0	1	1	36	732	766	8e-12	60.2
HWI-ST942:56:C4CFMACXX:7:2212:12182:430202	100.00	76	0	0	25	100	943	868	3e-36	141
HWI-ST942:56:C4CFMACXX:7:2212:12596:25922	96.97	33	0	1	1	32	93300	93332	4e-10	54.7
HWI-ST942:56:C4CFMACXX:7:2212:12596:25922	100.00	75	0	0	26	100	93396	93322	1e-35	139
HWI-ST942:56:C4CFMACXX:7:2212:17725:85072	100.00	67	0	0	1	67	68348	68414	3e-31	124
HWI-ST942:56:C4CFMACXX:7:2212:17725:85072	100.00	33	0	0	68	100	12376	12344	2e-12	62.1
HWI-ST942:56:C4CFMACXX:7:2212:21211:252132	89.58	48	4	1	1	47	87020	86973	8e-12	60.2
HWI-ST942:56:C4CFMACXX:7:2212:21211:252132	91.78	73	6	0	28	100	46909	46837	1e-24	102
HWI-ST942:56:C4CFMACXX:7:2212:4573:955981	97.06	34	0	1	1	34	97059	97091	7e-11	56.5
HWI-ST942:56:C4CFMACXX:7:2212:4573:955981	98.08	52	0	1	22	72	97024	97075	7e-21	89.8
HWI-ST942:56:C4CFMACXX:7:2212:4573:955982	98.04	51	0	1	1	50	97074	97024	2e-20	87.9
HWI-ST942:56:C4CFMACXX:7:2212:4573:955982	97.06	34	0	1	38	71	97091	97059	7e-11	56.5
HWI-ST942:56:C4CFMACXX:7:2212:8067:381151	98.73	79	1	0	1	79	34117	34039	3e-36	141
HWI-ST942:56:C4CFMACXX:7:2212:8067:381151	92.11	38	1	1	65	100	104400	104437	1e-09	52.8
HWI-ST942:56:C4CFMACXX:7:2212:9125:181251	100.00	72	0	0	1	72	102286	102357	5e-34	134
HWI-ST942:56:C4CFMACXX:7:2212:9125:181251	100.00	29	0	0	72	100	97361	97389	4e-10	54.7
HWI-ST942:56:C4CFMACXX:7:2213:14217:519731	100.00	29	0	0	1	29	96942	96914	4e-10	54.7
HWI-ST942:56:C4CFMACXX:7:2213:14217:519731	100.00	67	0	0	30	96	97004	96938	3e-31	124
HWI-ST942:56:C4CFMACXX:7:2213:15437:795552	100.00	32	0	0	1	32	104228	104259	8e-12	60.2
HWI-ST942:56:C4CFMACXX:7:2213:15437:795552	100.00	70	0	0	31	100	104290	104221	6e-33	130
HWI-ST942:56:C4CFMACXX:7:2213:17288:357962	100.00	29	0	0	1	29	109751	109779	4e-10	54.7
HWI-ST942:56:C4CFMACXX:7:2213:17288:357962	100.00	81	0	0	20	100	109846	109766	5e-39	150
HWI-ST942:56:C4CFMACXX:7:2213:20892:606092	98.08	52	1	0	1	52	90968	90917	3e-21	91.6
HWI-ST942:56:C4CFMACXX:7:2213:20892:606092	100.00	57	0	0	43	99	79992	79936	1e-25	106
HWI-ST942:56:C4CFMACXX:7:2213:2124:948151	98.08	52	1	0	1	52	81005	81056	3e-21	91.6
HWI-ST942:56:C4CFMACXX:7:2213:2124:948151	100.00	48	0	0	52	99	80950	80997	1e-20	89.8
HWI-ST942:56:C4CFMACXX:7:2213:2920:30572	100.00	44	0	0	1	44	16919	16876	2e-18	82.4
HWI-ST942:56:C4CFMACXX:7:2213:2920:30572	100.00	59	0	0	40	98	63082	63140	8e-27	110
HWI-ST942:56:C4CFMACXX:7:2213:7353:420022	84.62	52	8	0	1	52	22475	22424	1e-09	52.8
HWI-ST942:56:C4CFMACXX:7:2213:7353:420022	100.00	77	0	0	23	99	22412	22488	8e-37	143
HWI-ST942:56:C4CFMACXX:7:2214:12851:470462	100.00	60	0	0	1	60	89976	90035	2e-27	111
HWI-ST942:56:C4CFMACXX:7:2214:12851:470462	100.00	40	0	0	60	99	88931	88892	3e-16	75.0
HWI-ST942:56:C4CFMACXX:7:2214:18514:131281	97.33	75	2	0	1	75	111030	110956	2e-32	128
HWI-ST942:56:C4CFMACXX:7:2214:18514:131281	100.00	31	0	0	69	99	112200	112170	3e-11	58.4
HWI-ST942:56:C4CFMACXX:7:2214:18514:131282	100.00	64	0	0	1	64	112137	112200	1e-29	119
HWI-ST942:56:C4CFMACXX:7:2214:18514:131282	100.00	40	0	0	58	97	110956	110995	3e-16	75.0
HWI-ST942:56:C4CFMACXX:7:2214:19310:875992	98.18	55	0	1	1	55	113792	113739	2e-22	95.3
HWI-ST942:56:C4CFMACXX:7:2214:19310:875992	100.00	57	0	0	44	100	15756	15812	1e-25	106
HWI-ST942:56:C4CFMACXX:7:2215:13289:293591	100.00	74	0	0	1	74	96142	96069	4e-35	137
HWI-ST942:56:C4CFMACXX:7:2215:13289:293591	100.00	29	0	0	72	100	90252	90280	4e-10	54.7
HWI-ST942:56:C4CFMACXX:7:2215:13449:453071	100.00	71	0	0	1	71	9261	9331	2e-33	132
HWI-ST942:56:C4CFMACXX:7:2215:13449:453071	100.00	29	0	0	72	100	96515	96543	4e-10	54.7
HWI-ST942:56:C4CFMACXX:7:2215:13731:279012	100.00	34	0	0	1	34	96849	96882	6e-13	63.9
HWI-ST942:56:C4CFMACXX:7:2215:13731:279012	100.00	72	0	0	29	100	96899	96828	5e-34	134
HWI-ST942:56:C4CFMACXX:7:2215:16245:48852	100.00	25	0	0	1	25	100511	100487	6e-08	47.3
HWI-ST942:56:C4CFMACXX:7:2215:16245:48852	97.18	71	1	1	18	88	100453	100522	1e-29	119
HWI-ST942:56:C4CFMACXX:7:2215:17589:908552	87.93	58	2	5	1	55	71407	71352	6e-13	63.9
HWI-ST942:56:C4CFMACXX:7:2215:17589:908552	100.00	76	0	0	24	99	14932	14857	3e-36	141
HWI-ST942:56:C4CFMACXX:7:2215:18415:30282	100.00	81	0	0	1	81	84049	83969	5e-39	150
HWI-ST942:56:C4CFMACXX:7:2215:18415:30282	100.00	24	0	0	76	99	98304	98281	2e-07	45.4
HWI-ST942:56:C4CFMACXX:7:2215:18457:910521	100.00	35	0	0	1	35	121130	121096	2e-13	65.8
HWI-ST942:56:C4CFMACXX:7:2215:18457:910521	100.00	65	0	0	28	92	113859	113923	3e-30	121
HWI-ST942:56:C4CFMACXX:7:2215:18457:910522	100.00	65	0	0	1	65	113923	113859	3e-30	121
HWI-ST942:56:C4CFMACXX:7:2215:18457:910522	100.00	35	0	0	58	92	121096	121130	2e-13	65.8
HWI-ST942:56:C4CFMACXX:7:2215:2177:311591	98.31	59	1	0	1	59	36812	36870	4e-25	104
HWI-ST942:56:C4CFMACXX:7:2215:2177:311591	100.00	41	0	0	59	99	36787	36827	8e-17	76.8
HWI-ST942:56:C4CFMACXX:7:2215:2177:311592	100.00	52	0	0	1	52	36838	36787	6e-23	97.1
HWI-ST942:56:C4CFMACXX:7:2215:2177:311592	100.00	49	0	0	52	100	36870	36822	3e-21	91.6
HWI-ST942:56:C4CFMACXX:7:2215:2731:987002	100.00	76	0	0	1	76	108817	108742	3e-36	141
HWI-ST942:56:C4CFMACXX:7:2215:2731:987002	100.00	28	0	0	73	100	21219	21246	1e-09	52.8
HWI-ST942:56:C4CFMACXX:7:2215:3982:645422	96.67	30	1	0	1	30	88333	88304	5e-09	51.0
HWI-ST942:56:C4CFMACXX:7:2215:3982:645422	100.00	78	0	0	23	100	88277	88200	2e-37	145
HWI-ST942:56:C4CFMACXX:7:2215:5487:706542	100.00	24	0	0	1	24	64746	64723	2e-07	45.4
HWI-ST942:56:C4CFMACXX:7:2215:5487:706542	100.00	90	0	0	11	100	64723	64812	5e-44	167
HWI-ST942:56:C4CFMACXX:7:2216:10704:43951	100.00	65	0	0	1	65	100728	100792	4e-30	121
HWI-ST942:56:C4CFMACXX:7:2216:10704:43951	100.00	38	0	0	63	100	46337	46374	4e-15	71.3
HWI-ST942:56:C4CFMACXX:7:2216:16329:240622	91.80	61	5	0	1	61	51587	51527	1e-19	86.1
HWI-ST942:56:C4CFMACXX:7:2216:16329:240622	87.50	40	5	0	59	98	7875	7836	6e-08	47.3
HWI-ST942:56:C4CFMACXX:7:2216:4239:236352	98.72	78	1	0	1	78	84791	84868	1e-35	139
HWI-ST942:56:C4CFMACXX:7:2216:4239:236352	100.00	21	0	0	77	97	92970	92990	1e-05	39.9
HWI-ST942:56:C4CFMACXX:7:2216:7980:561791	100.00	71	0	0	1	71	1321	1391	2e-33	132
HWI-ST942:56:C4CFMACXX:7:2216:7980:561791	100.00	29	0	0	71	99	87023	86995	4e-10	54.7
HWI-ST942:56:C4CFMACXX:7:2216:9534:640912	100.00	26	0	0	1	26	51983	51958	2e-08	49.1
HWI-ST942:56:C4CFMACXX:7:2216:9534:640912	87.50	72	8	1	30	100	51909	51838	2e-18	82.4
HWI-ST942:56:C4CFMACXX:7:2301:11254:830661	100.00	67	0	0	1	67	21182	21248	3e-31	124
HWI-ST942:56:C4CFMACXX:7:2301:11254:830661	93.94	33	2	0	54	86	83958	83926	5e-09	51.0
HWI-ST942:56:C4CFMACXX:7:2301:11254:830662	88.89	72	4	4	1	70	83938	83869	1e-19	86.1
HWI-ST942:56:C4CFMACXX:7:2301:11254:830662	100.00	70	0	0	31	100	83869	83938	6e-33	130
HWI-ST942:56:C4CFMACXX:7:2301:11859:98792	100.00	74	0	0	1	74	92657	92584	4e-35	137
HWI-ST942:56:C4CFMACXX:7:2301:11859:98792	100.00	28	0	0	73	100	20572	20545	1e-09	52.8
HWI-ST942:56:C4CFMACXX:7:2301:12608:206052	100.00	45	0	0	1	45	83034	83078	5e-19	84.2
HWI-ST942:56:C4CFMACXX:7:2301:12608:206052	90.74	54	5	0	44	97	83095	83042	1e-15	73.1
HWI-ST942:56:C4CFMACXX:7:2301:1630:791402	100.00	21	0	0	1	21	106568	106588	1e-05	39.9
HWI-ST942:56:C4CFMACXX:7:2301:1630:791402	98.80	83	1	0	18	100	106615	106533	2e-38	148
HWI-ST942:56:C4CFMACXX:7:2301:19527:447521	100.00	37	0	0	1	37	26642	26606	1e-14	69.4
HWI-ST942:56:C4CFMACXX:7:2301:19527:447521	100.00	77	0	0	24	100	30191	30115	8e-37	143
HWI-ST942:56:C4CFMACXX:7:2301:19527:447522	100.00	94	0	0	1	94	30098	30191	3e-46	174
HWI-ST942:56:C4CFMACXX:7:2301:19527:447522	100.00	20	0	0	81	100	26606	26625	4e-05	38.1
HWI-ST942:56:C4CFMACXX:7:2301:8361:336612	100.00	24	0	0	1	24	114713	114736	2e-07	45.4
HWI-ST942:56:C4CFMACXX:7:2301:8361:336612	100.00	75	0	0	25	99	114737	114663	1e-35	139
HWI-ST942:56:C4CFMACXX:7:2302:11597:601762	95.45	44	2	0	1	44	24261	24218	4e-15	71.3
HWI-ST942:56:C4CFMACXX:7:2302:11597:601762	100.00	70	0	0	31	100	24127	24196	6e-33	130
HWI-ST942:56:C4CFMACXX:7:2302:11739:158052	97.78	90	0	2	1	89	37714	37802	4e-40	154
HWI-ST942:56:C4CFMACXX:7:2302:11739:158052	100.00	23	0	0	77	99	109193	109215	8e-07	43.6
HWI-ST942:56:C4CFMACXX:7:2302:12749:990151	98.11	53	1	0	1	53	13676	13624	8e-22	93.5
HWI-ST942:56:C4CFMACXX:7:2302:12749:990151	96.23	53	1	1	44	96	13755	13704	1e-19	86.1
HWI-ST942:56:C4CFMACXX:7:2302:13790:971092	100.00	71	0	0	1	71	25131	25201	2e-33	132
HWI-ST942:56:C4CFMACXX:7:2302:13790:971092	100.00	30	0	0	70	99	121707	121678	1e-10	56.5
HWI-ST942:56:C4CFMACXX:7:2302:1521:584011	100.00	74	0	0	1	74	6249	6176	4e-35	137
HWI-ST942:56:C4CFMACXX:7:2302:1521:584011	97.14	35	0	1	67	100	5968	6002	3e-11	58.4
HWI-ST942:56:C4CFMACXX:7:2302:1521:584012	98.39	62	0	1	1	61	6029	5968	3e-26	108
HWI-ST942:56:C4CFMACXX:7:2302:1521:584012	100.00	46	0	0	54	99	6176	6221	1e-19	86.1
HWI-ST942:56:C4CFMACXX:7:2302:18069:888012	100.00	71	0	0	1	71	122923	122993	2e-33	132
HWI-ST942:56:C4CFMACXX:7:2302:18069:888012	100.00	30	0	0	71	100	126674	126703	1e-10	56.5
HWI-ST942:56:C4CFMACXX:7:2302:3518:40171	100.00	77	0	0	1	77	106824	106900	7e-37	143
HWI-ST942:56:C4CFMACXX:7:2302:3518:40171	100.00	20	0	0	77	96	76366	76347	4e-05	38.1
HWI-ST942:56:C4CFMACXX:7:2302:8122:52462	97.37	38	1	0	1	38	93380	93417	2e-13	65.8
HWI-ST942:56:C4CFMACXX:7:2302:8122:52462	100.00	69	0	0	31	99	93470	93402	2e-32	128
HWI-ST942:56:C4CFMACXX:7:2303:12383:576452	86.96	46	4	2	1	45	109820	109776	5e-09	51.0
HWI-ST942:56:C4CFMACXX:7:2303:12383:576452	100.00	78	0	0	23	100	109772	109849	2e-37	145
HWI-ST942:56:C4CFMACXX:7:2303:14357:820272	100.00	27	0	0	1	27	105441	105467	5e-09	51.0
HWI-ST942:56:C4CFMACXX:7:2303:14357:820272	100.00	77	0	0	24	100	105492	105416	8e-37	143
HWI-ST942:56:C4CFMACXX:7:2303:1537:755602	100.00	32	0	0	1	32	91804	91773	8e-12	60.2
HWI-ST942:56:C4CFMACXX:7:2303:1537:755602	100.00	74	0	0	23	96	91657	91730	3e-35	137
HWI-ST942:56:C4CFMACXX:7:2303:15552:439792	100.00	68	0	0	1	68	106178	106111	8e-32	126
HWI-ST942:56:C4CFMACXX:7:2303:15552:439792	100.00	33	0	0	68	100	1928	1896	2e-12	62.1
HWI-ST942:56:C4CFMACXX:7:2303:17952:448241	100.00	76	0	0	1	76	111029	111104	3e-36	141
HWI-ST942:56:C4CFMACXX:7:2303:17952:448241	100.00	22	0	0	75	96	111010	111031	3e-06	41.7
HWI-ST942:56:C4CFMACXX:7:2303:17952:448242	100.00	44	0	0	1	44	111053	111010	2e-18	82.4
HWI-ST942:56:C4CFMACXX:7:2303:17952:448242	100.00	58	0	0	43	100	111104	111047	3e-26	108
HWI-ST942:56:C4CFMACXX:7:2303:19066:781482	96.00	25	1	0	1	25	17094	17070	3e-06	41.7
HWI-ST942:56:C4CFMACXX:7:2303:19066:781482	100.00	79	0	0	18	96	17014	17092	6e-38	147
HWI-ST942:56:C4CFMACXX:7:2303:19520:74771	92.31	39	1	2	1	37	50462	50500	2e-10	54.7
HWI-ST942:56:C4CFMACXX:7:2303:19520:74771	98.15	54	1	0	16	69	82178	82231	1e-22	95.3
HWI-ST942:56:C4CFMACXX:7:2303:19520:74772	98.15	54	1	0	1	54	82231	82178	1e-22	95.3
HWI-ST942:56:C4CFMACXX:7:2303:19520:74772	92.31	39	1	2	33	69	50500	50462	2e-10	54.7
HWI-ST942:56:C4CFMACXX:7:2303:20776:911212	100.00	47	0	0	1	47	110604	110650	4e-20	87.9
HWI-ST942:56:C4CFMACXX:7:2303:20776:911212	100.00	57	0	0	44	100	110701	110645	1e-25	106
HWI-ST942:56:C4CFMACXX:7:2303:21186:625502	96.77	31	1	0	1	31	19663	19633	1e-09	52.8
HWI-ST942:56:C4CFMACXX:7:2303:21186:625502	100.00	79	0	0	22	100	19579	19657	6e-38	147
HWI-ST942:56:C4CFMACXX:7:2303:4796:466272	97.62	42	1	0	1	42	41726	41767	1e-15	73.1
HWI-ST942:56:C4CFMACXX:7:2303:4796:466272	100.00	66	0	0	35	100	41788	41723	1e-30	122
HWI-ST942:56:C4CFMACXX:7:2303:8234:862612	100.00	26	0	0	1	26	79516	79541	2e-08	49.1
HWI-ST942:56:C4CFMACXX:7:2303:8234:862612	100.00	72	0	0	27	98	79542	79471	5e-34	134
HWI-ST942:56:C4CFMACXX:7:2303:9776:190912	100.00	65	0	0	1	65	14667	14603	4e-30	121
HWI-ST942:56:C4CFMACXX:7:2303:9776:190912	100.00	41	0	0	60	100	106744	106704	8e-17	76.8
HWI-ST942:56:C4CFMACXX:7:2304:13904:31581	100.00	27	0	0	1	27	75067	75093	5e-09	51.0
HWI-ST942:56:C4CFMACXX:7:2304:13904:31581	100.00	73	0	0	28	100	75276	75348	1e-34	135
HWI-ST942:56:C4CFMACXX:7:2304:16696:196452	96.88	32	0	1	1	31	46581	46612	1e-09	52.8
HWI-ST942:56:C4CFMACXX:7:2304:16696:196452	93.06	72	4	1	22	93	46656	46586	4e-25	104
HWI-ST942:56:C4CFMACXX:7:2304:20062:241541	100.00	35	0	0	1	35	39998	39964	2e-13	65.8
HWI-ST942:56:C4CFMACXX:7:2304:20062:241541	100.00	65	0	0	36	100	39942	39878	4e-30	121
HWI-ST942:56:C4CFMACXX:7:2305:14613:687212	98.68	76	0	1	1	76	110957	111031	5e-34	134
HWI-ST942:56:C4CFMACXX:7:2305:14613:687212	100.00	34	0	0	66	99	109339	109306	6e-13	63.9
HWI-ST942:56:C4CFMACXX:7:2305:14873:836982	100.00	33	0	0	1	33	88822	88790	2e-12	62.1
HWI-ST942:56:C4CFMACXX:7:2305:14873:836982	100.00	71	0	0	30	100	88777	88847	2e-33	132
HWI-ST942:56:C4CFMACXX:7:2305:1605:865272	89.36	47	5	0	1	47	7576	7530	8e-12	60.2
HWI-ST942:56:C4CFMACXX:7:2305:1605:865272	100.00	83	0	0	17	99	7527	7609	4e-40	154
HWI-ST942:56:C4CFMACXX:7:2305:4795:276221	100.00	80	0	0	1	80	28831	28910	2e-38	148
HWI-ST942:56:C4CFMACXX:7:2305:4795:276221	100.00	22	0	0	79	100	15398	15419	3e-06	41.7
HWI-ST942:56:C4CFMACXX:7:2305:9978:268812	100.00	30	0	0	1	30	65703	65732	1e-10	56.5
HWI-ST942:56:C4CFMACXX:7:2305:9978:268812	97.44	78	2	0	19	96	65732	65655	4e-34	134
HWI-ST942:56:C4CFMACXX:7:2306:1304:601102	96.43	28	1	0	1	28	93356	93383	6e-08	47.3
HWI-ST942:56:C4CFMACXX:7:2306:1304:601102	98.72	78	1	0	23	100	93417	93340	1e-35	139
HWI-ST942:56:C4CFMACXX:7:2306:15039:585212	100.00	25	0	0	1	25	78426	78450	6e-08	47.3
HWI-ST942:56:C4CFMACXX:7:2306:15039:585212	100.00	77	0	0	24	100	78472	78396	8e-37	143
HWI-ST942:56:C4CFMACXX:7:2306:15285:901192	100.00	51	0	0	1	51	98186	98236	2e-22	95.3
HWI-ST942:56:C4CFMACXX:7:2306:15285:901192	100.00	50	0	0	51	100	75994	75945	8e-22	93.5
HWI-ST942:56:C4CFMACXX:7:2306:16870:920331	98.21	56	1	0	1	56	80438	80493	2e-23	99.0
HWI-ST942:56:C4CFMACXX:7:2306:16870:920331	97.96	49	1	0	52	100	80384	80432	1e-19	86.1
HWI-ST942:56:C4CFMACXX:7:2306:17595:441951	100.00	79	0	0	1	79	95140	95062	6e-38	147
HWI-ST942:56:C4CFMACXX:7:2306:17595:441951	100.00	22	0	0	79	100	86893	86872	3e-06	41.7
HWI-ST942:56:C4CFMACXX:7:2306:19167:355402	100.00	80	0	0	1	80	98708	98787	2e-38	148
HWI-ST942:56:C4CFMACXX:7:2306:19167:355402	100.00	28	0	0	73	100	63864	63837	1e-09	52.8
HWI-ST942:56:C4CFMACXX:7:2306:1995:800592	100.00	26	0	0	1	26	28443	28418	2e-08	49.1
HWI-ST942:56:C4CFMACXX:7:2306:1995:800592	100.00	67	0	0	24	90	28389	28455	3e-31	124
HWI-ST942:56:C4CFMACXX:7:2306:3127:601162	98.53	68	0	1	1	67	48946	49013	1e-29	119
HWI-ST942:56:C4CFMACXX:7:2306:3127:601162	100.00	36	0	0	64	99	75885	75920	5e-14	67.6
HWI-ST942:56:C4CFMACXX:7:2306:3546:635532	92.59	27	2	0	1	27	81540	81514	1e-05	39.9
HWI-ST942:56:C4CFMACXX:7:2306:3546:635532	100.00	80	0	0	20	99	81487	81566	2e-38	148
HWI-ST942:56:C4CFMACXX:7:2306:3791:591772	100.00	50	0	0	1	50	30538	30489	8e-22	93.5
HWI-ST942:56:C4CFMACXX:7:2306:3791:591772	100.00	49	0	0	51	99	66058	66010	3e-21	91.6
HWI-ST942:56:C4CFMACXX:7:2306:6374:643782	100.00	70	0	0	1	70	553	622	6e-33	130
HWI-ST942:56:C4CFMACXX:7:2306:6374:643782	100.00	31	0	0	69	99	77884	77854	3e-11	58.4
HWI-ST942:56:C4CFMACXX:7:2307:10088:886772	100.00	68	0	0	1	68	15711	15778	8e-32	126
HWI-ST942:56:C4CFMACXX:7:2307:10088:886772	100.00	36	0	0	65	100	107013	106978	5e-14	67.6
HWI-ST942:56:C4CFMACXX:7:2307:14327:632412	97.67	43	1	0	1	43	78128	78086	3e-16	75.0
HWI-ST942:56:C4CFMACXX:7:2307:14327:632412	100.00	70	0	0	31	100	54916	54847	6e-33	130
HWI-ST942:56:C4CFMACXX:7:2307:16972:809911	96.72	61	2	0	1	61	50799	50859	1e-24	102
HWI-ST942:56:C4CFMACXX:7:2307:16972:809911	100.00	45	0	0	48	92	82464	82420	4e-19	84.2
HWI-ST942:56:C4CFMACXX:7:2307:17450:154522	100.00	73	0	0	1	73	92105	92177	1e-34	135
HWI-ST942:56:C4CFMACXX:7:2307:17450:154522	100.00	28	0	0	73	100	83733	83760	1e-09	52.8
HWI-ST942:56:C4CFMACXX:7:2307:3110:725682	100.00	47	0	0	1	47	127201	127155	4e-20	87.9
HWI-ST942:56:C4CFMACXX:7:2307:3110:725682	100.00	53	0	0	48	100	127266	127214	2e-23	99.0
HWI-ST942:56:C4CFMACXX:7:2307:9408:736562	98.72	78	0	1	1	77	15759	15682	4e-35	137
HWI-ST942:56:C4CFMACXX:7:2307:9408:736562	100.00	28	0	0	73	100	91718	91745	1e-09	52.8
HWI-ST942:56:C4CFMACXX:7:2307:9433:598812	100.00	43	0	0	1	43	62104	62062	6e-18	80.5
HWI-ST942:56:C4CFMACXX:7:2307:9433:598812	100.00	62	0	0	37	98	62044	62105	2e-28	115
HWI-ST942:56:C4CFMACXX:7:2308:11805:145902	100.00	36	0	0	1	36	89284	89319	5e-14	67.6
HWI-ST942:56:C4CFMACXX:7:2308:11805:145902	100.00	63	0	0	34	96	89351	89289	4e-29	117
HWI-ST942:56:C4CFMACXX:7:2308:15559:66322	100.00	73	0	0	1	73	83535	83607	1e-34	135
HWI-ST942:56:C4CFMACXX:7:2308:15559:66322	100.00	32	0	0	69	100	83629	83598	8e-12	60.2
HWI-ST942:56:C4CFMACXX:7:2308:19265:810941	98.73	79	1	0	1	79	21491	21413	3e-36	141
HWI-ST942:56:C4CFMACXX:7:2308:19265:810941	100.00	22	0	0	79	100	85535	85514	3e-06	41.7
HWI-ST942:56:C4CFMACXX:7:2308:19672:762561	100.00	72	0	0	1	72	97795	97724	5e-34	134
HWI-ST942:56:C4CFMACXX:7:2308:19672:762561	100.00	28	0	0	72	99	22631	22658	1e-09	52.8
HWI-ST942:56:C4CFMACXX:7:2308:21025:951511	98.25	57	1	0	1	57	107704	107648	4e-24	100
HWI-ST942:56:C4CFMACXX:7:2308:21025:951511	100.00	36	0	0	56	91	107770	107735	4e-14	67.6
HWI-ST942:56:C4CFMACXX:7:2308:21025:951512	100.00	36	0	0	1	36	107735	107770	4e-14	67.6
HWI-ST942:56:C4CFMACXX:7:2308:21025:951512	100.00	57	0	0	35	91	107648	107704	9e-26	106
HWI-ST942:56:C4CFMACXX:7:2308:4829:403792	100.00	52	0	0	1	52	100291	100342	6e-23	97.1
HWI-ST942:56:C4CFMACXX:7:2308:4829:403792	98.08	52	0	1	49	100	115929	115979	1e-20	89.8
HWI-ST942:56:C4CFMACXX:7:2308:7064:400852	97.06	68	2	0	1	68	99823	99756	2e-28	115
HWI-ST942:56:C4CFMACXX:7:2308:7064:400852	100.00	44	0	0	53	96	99756	99799	2e-18	82.4
HWI-ST942:56:C4CFMACXX:7:2308:7563:715592	98.72	78	1	0	1	78	120571	120648	1e-35	139
HWI-ST942:56:C4CFMACXX:7:2308:7563:715592	100.00	30	0	0	71	100	32824	32795	1e-10	56.5
HWI-ST942:56:C4CFMACXX:7:2308:7714:757672	100.00	25	0	0	1	25	107923	107947	6e-08	47.3
HWI-ST942:56:C4CFMACXX:7:2308:7714:757672	97.37	76	2	0	21	96	107996	107921	6e-33	130
HWI-ST942:56:C4CFMACXX:7:2308:7812:740242	100.00	24	0	0	1	24	100202	100225	2e-07	45.4
HWI-ST942:56:C4CFMACXX:7:2308:7812:740242	100.00	79	0	0	22	100	100266	100188	6e-38	147
HWI-ST942:56:C4CFMACXX:7:2309:10260:932901	100.00	59	0	0	1	59	74619	74561	8e-27	110
HWI-ST942:56:C4CFMACXX:7:2309:10260:932901	100.00	48	0	0	53	100	62767	62814	1e-20	89.8
HWI-ST942:56:C4CFMACXX:7:2309:13585:564401	100.00	67	0	0	1	67	56048	56114	3e-31	124
HWI-ST942:56:C4CFMACXX:7:2309:13585:564401	100.00	33	0	0	67	99	100717	100749	2e-12	62.1
HWI-ST942:56:C4CFMACXX:7:2309:14823:322192	100.00	23	0	0	1	23	99825	99847	8e-07	43.6
HWI-ST942:56:C4CFMACXX:7:2309:14823:322192	100.00	81	0	0	19	99	99903	99823	5e-39	150
HWI-ST942:56:C4CFMACXX:7:2309:15834:877282	94.29	35	2	0	1	35	29378	29344	4e-10	54.7
HWI-ST942:56:C4CFMACXX:7:2309:15834:877282	100.00	86	0	0	14	99	29344	29429	8e-42	159
HWI-ST942:56:C4CFMACXX:7:2309:1616:106302	100.00	45	0	0	1	45	71027	71071	5e-19	84.2
HWI-ST942:56:C4CFMACXX:7:2309:1616:106302	100.00	61	0	0	39	99	71112	71052	6e-28	113
HWI-ST942:56:C4CFMACXX:7:2309:16262:182292	97.75	89	2	0	1	89	75065	75153	4e-40	154
HWI-ST942:56:C4CFMACXX:7:2309:16262:182292	100.00	26	0	0	75	100	2969	2994	2e-08	49.1
HWI-ST942:56:C4CFMACXX:7:2309:16730:849241	100.00	85	0	0	1	85	90434	90350	3e-41	158
HWI-ST942:56:C4CFMACXX:7:2309:16730:849241	100.00	23	0	0	78	100	90350	90372	8e-07	43.6
HWI-ST942:56:C4CFMACXX:7:2309:16730:849242	100.00	32	0	0	1	32	90381	90350	8e-12	60.2
HWI-ST942:56:C4CFMACXX:7:2309:16730:849242	100.00	76	0	0	25	100	90350	90425	3e-36	141
HWI-ST942:56:C4CFMACXX:7:2309:17814:56522	100.00	78	0	0	1	78	30842	30919	2e-37	145
HWI-ST942:56:C4CFMACXX:7:2309:17814:56522	100.00	32	0	0	69	100	18244	18213	8e-12	60.2
HWI-ST942:56:C4CFMACXX:7:2309:3401:304802	100.00	75	0	0	1	75	62181	62107	1e-35	139
HWI-ST942:56:C4CFMACXX:7:2309:3401:304802	100.00	27	0	0	73	99	11553	11579	5e-09	51.0
HWI-ST942:56:C4CFMACXX:7:2309:3603:781972	100.00	21	0	0	1	21	5728	5708	1e-05	39.9
HWI-ST942:56:C4CFMACXX:7:2309:3603:781972	100.00	83	0	0	17	99	5654	5736	4e-40	154
HWI-ST942:56:C4CFMACXX:7:2309:4234:740871	100.00	83	0	0	1	83	56610	56528	4e-40	154
HWI-ST942:56:C4CFMACXX:7:2309:4234:740871	100.00	21	0	0	79	99	34354	34374	1e-05	39.9
HWI-ST942:56:C4CFMACXX:7:2309:6920:623772	100.00	62	0	0	1	62	122560	122621	2e-28	115
HWI-ST942:56:C4CFMACXX:7:2309:6920:623772	100.00	40	0	0	60	99	122586	122547	3e-16	75.0
HWI-ST942:56:C4CFMACXX:7:2309:7192:53872	100.00	29	0	0	1	29	108291	108263	4e-10	54.7
HWI-ST942:56:C4CFMACXX:7:2309:7192:53872	100.00	80	0	0	21	100	73958	73879	2e-38	148
HWI-ST942:56:C4CFMACXX:7:2309:7837:847232	100.00	27	0	0	1	27	52997	52971	5e-09	51.0
HWI-ST942:56:C4CFMACXX:7:2309:7837:847232	98.67	75	1	0	26	100	52929	53003	5e-34	134
HWI-ST942:56:C4CFMACXX:7:2310:10131:711072	93.22	59	4	0	1	59	111949	112007	4e-20	87.9
HWI-ST942:56:C4CFMACXX:7:2310:10131:711072	96.00	50	2	0	50	99	112051	112002	2e-18	82.4
HWI-ST942:56:C4CFMACXX:7:2310:12901:449812	100.00	72	0	0	1	72	37720	37649	4e-34	134
HWI-ST942:56:C4CFMACXX:7:2310:12901:449812	100.00	31	0	0	66	96	37491	37521	3e-11	58.4
HWI-ST942:56:C4CFMACXX:7:2310:14296:390592	100.00	67	0	0	1	67	27262	27196	3e-31	124
HWI-ST942:56:C4CFMACXX:7:2310:14296:390592	97.92	48	1	0	50	97	27196	27243	5e-19	84.2
HWI-ST942:56:C4CFMACXX:7:2310:8329:608832	100.00	51	0	0	1	51	109642	109592	2e-22	95.3
HWI-ST942:56:C4CFMACXX:7:2310:8329:608832	100.00	60	0	0	41	100	73120	73179	2e-27	111
HWI-ST942:56:C4CFMACXX:7:2311:10999:127252	100.00	37	0	0	1	37	16476	16512	1e-14	69.4
HWI-ST942:56:C4CFMACXX:7:2311:10999:127252	97.18	71	1	1	27	96	16602	16532	1e-29	119
HWI-ST942:56:C4CFMACXX:7:2311:11233:604152	100.00	58	0	0	1	58	40677	40734	3e-26	108
HWI-ST942:56:C4CFMACXX:7:2311:11233:604152	100.00	47	0	0	54	100	40758	40712	4e-20	87.9
HWI-ST942:56:C4CFMACXX:7:2311:13531:301491	100.00	71	0	0	1	71	38546	38616	2e-33	132
HWI-ST942:56:C4CFMACXX:7:2311:13531:301491	100.00	29	0	0	72	100	70723	70695	4e-10	54.7
HWI-ST942:56:C4CFMACXX:7:2311:15221:992822	100.00	68	0	0	1	68	106178	106111	8e-32	126
HWI-ST942:56:C4CFMACXX:7:2311:15221:992822	93.94	33	2	0	68	100	1928	1896	5e-09	51.0
HWI-ST942:56:C4CFMACXX:7:2311:9092:308462	94.44	36	1	1	1	36	97749	97783	4e-10	54.7
HWI-ST942:56:C4CFMACXX:7:2311:9092:308462	100.00	77	0	0	23	99	85765	85841	8e-37	143
HWI-ST942:56:C4CFMACXX:7:2312:11225:968972	100.00	36	0	0	1	36	105569	105604	5e-14	67.6
HWI-ST942:56:C4CFMACXX:7:2312:11225:968972	98.46	65	1	0	35	99	93517	93581	2e-28	115
HWI-ST942:56:C4CFMACXX:7:2312:16291:280101	100.00	31	0	0	1	31	84407	84437	3e-11	58.4
HWI-ST942:56:C4CFMACXX:7:2312:16291:280101	100.00	69	0	0	31	99	57058	57126	2e-32	128
HWI-ST942:56:C4CFMACXX:7:2312:16604:895961	100.00	59	0	0	1	59	96682	96624	8e-27	110
HWI-ST942:56:C4CFMACXX:7:2312:16604:895961	100.00	42	0	0	57	98	96753	96712	2e-17	78.7
HWI-ST942:56:C4CFMACXX:7:2312:17592:357281	100.00	45	0	0	1	45	99631	99675	4e-19	84.2
HWI-ST942:56:C4CFMACXX:7:2312:17592:357281	98.08	52	1	0	34	85	87676	87727	2e-21	91.6
HWI-ST942:56:C4CFMACXX:7:2312:17592:357282	100.00	51	0	0	1	51	87726	87676	2e-22	95.3
HWI-ST942:56:C4CFMACXX:7:2312:17592:357282	100.00	45	0	0	40	84	99675	99631	4e-19	84.2
HWI-ST942:56:C4CFMACXX:7:2312:3058:282302	100.00	27	0	0	1	27	32462	32436	5e-09	51.0
HWI-ST942:56:C4CFMACXX:7:2312:3058:282302	100.00	70	0	0	27	96	8640	8571	6e-33	130
HWI-ST942:56:C4CFMACXX:7:2312:6438:581492	100.00	46	0	0	1	46	28604	28649	1e-19	86.1
HWI-ST942:56:C4CFMACXX:7:2312:6438:581492	100.00	62	0	0	39	100	100614	100553	2e-28	115
HWI-ST942:56:C4CFMACXX:7:2312:9888:568492	96.88	32	1	0	1	32	112792	112823	4e-10	54.7
HWI-ST942:56:C4CFMACXX:7:2312:9888:568492	100.00	78	0	0	23	100	112878	112801	2e-37	145
HWI-ST942:56:C4CFMACXX:7:2313:10072:827562	98.73	79	1	0	1	79	99453	99375	3e-36	141
HWI-ST942:56:C4CFMACXX:7:2313:10072:827562	96.43	28	1	0	73	100	71770	71743	6e-08	47.3
HWI-ST942:56:C4CFMACXX:7:2313:10191:422102	98.41	63	1	0	1	63	47673	47611	2e-27	111
HWI-ST942:56:C4CFMACXX:7:2313:10191:422102	100.00	38	0	0	63	100	116717	116754	4e-15	71.3
HWI-ST942:56:C4CFMACXX:7:2313:10570:33072	83.33	78	5	8	1	74	76819	76746	2e-13	65.8
HWI-ST942:56:C4CFMACXX:7:2313:10570:33072	100.00	72	0	0	28	99	76746	76817	5e-34	134
HWI-ST942:56:C4CFMACXX:7:2313:11231:592552	96.77	31	1	0	1	31	16219	16189	1e-09	52.8
HWI-ST942:56:C4CFMACXX:7:2313:11231:592552	100.00	73	0	0	27	99	16159	16231	1e-34	135
HWI-ST942:56:C4CFMACXX:7:2313:16579:709971	98.68	76	1	0	1	76	63070	63145	1e-34	135
HWI-ST942:56:C4CFMACXX:7:2313:16579:709971	100.00	26	0	0	75	100	103652	103627	2e-08	49.1
HWI-ST942:56:C4CFMACXX:7:2313:3902:787421	100.00	81	0	0	1	81	35556	35636	5e-39	150
HWI-ST942:56:C4CFMACXX:7:2313:3902:787421	100.00	22	0	0	79	100	47065	47086	3e-06	41.7
HWI-ST942:56:C4CFMACXX:7:2313:5787:642731	100.00	63	0	0	1	63	82268	82206	5e-29	117
HWI-ST942:56:C4CFMACXX:7:2313:5787:642731	87.67	73	6	2	27	99	98005	97936	2e-18	82.4
HWI-ST942:56:C4CFMACXX:7:2313:5843:391142	100.00	33	0	0	1	33	56498	56466	2e-12	62.1
HWI-ST942:56:C4CFMACXX:7:2313:5843:391142	100.00	69	0	0	32	100	56552	56484	2e-32	128
HWI-ST942:56:C4CFMACXX:7:2313:8397:663932	96.77	31	0	1	1	30	102010	102040	5e-09	51.0
HWI-ST942:56:C4CFMACXX:7:2313:8397:663932	100.00	76	0	0	24	99	110128	110053	3e-36	141
HWI-ST942:56:C4CFMACXX:7:2314:10174:441871	96.08	51	2	0	1	51	81477	81427	5e-19	84.2
HWI-ST942:56:C4CFMACXX:7:2314:10174:441871	100.00	62	0	0	39	100	109292	109231	2e-28	115
HWI-ST942:56:C4CFMACXX:7:2314:10797:802392	100.00	81	0	0	1	81	80009	79929	5e-39	150
HWI-ST942:56:C4CFMACXX:7:2314:10797:802392	100.00	22	0	0	79	100	13044	13023	3e-06	41.7
HWI-ST942:56:C4CFMACXX:7:2314:15278:568802	100.00	65	0	0	1	65	49769	49833	4e-30	121
HWI-ST942:56:C4CFMACXX:7:2314:15278:568802	100.00	39	0	0	61	99	85839	85877	1e-15	73.1
HWI-ST942:56:C4CFMACXX:7:2314:15373:282201	97.56	82	2	0	1	82	26285	26204	3e-36	141
HWI-ST942:56:C4CFMACXX:7:2314:15373:282201	100.00	27	0	0	73	99	109724	109698	5e-09	51.0
HWI-ST942:56:C4CFMACXX:7:2314:2583:259262	87.50	40	3	2	1	39	53472	53434	2e-07	45.4
HWI-ST942:56:C4CFMACXX:7:2314:2583:259262	100.00	80	0	0	21	100	53333	53412	2e-38	148
HWI-ST942:56:C4CFMACXX:7:2314:3468:132962	98.51	67	1	0	1	67	123317	123251	1e-29	119
HWI-ST942:56:C4CFMACXX:7:2314:3468:132962	100.00	34	0	0	66	99	120393	120360	6e-13	63.9
HWI-ST942:56:C4CFMACXX:7:2314:4122:127982	100.00	56	0	0	1	56	67219	67164	4e-25	104
HWI-ST942:56:C4CFMACXX:7:2314:4122:127982	90.00	30	3	0	71	100	127096	127067	1e-05	39.9
HWI-ST942:56:C4CFMACXX:7:2314:4682:736242	100.00	80	0	0	1	80	25929	25850	2e-38	148
HWI-ST942:56:C4CFMACXX:7:2314:4682:736242	100.00	20	0	0	81	100	26375	26394	4e-05	38.1
HWI-ST942:56:C4CFMACXX:7:2315:12688:814852	100.00	66	0	0	1	66	98452	98517	1e-30	122
HWI-ST942:56:C4CFMACXX:7:2315:12688:814852	100.00	38	0	0	63	100	39858	39821	4e-15	71.3
HWI-ST942:56:C4CFMACXX:7:2315:14320:314572	98.31	59	1	0	1	59	38620	38678	4e-25	104
HWI-ST942:56:C4CFMACXX:7:2315:14320:314572	100.00	54	0	0	46	99	38678	38625	5e-24	100
HWI-ST942:56:C4CFMACXX:7:2315:15451:126381	100.00	43	0	0	1	43	90939	90897	6e-18	80.5
HWI-ST942:56:C4CFMACXX:7:2315:15451:126381	98.51	67	1	0	34	100	20091	20157	1e-29	119
HWI-ST942:56:C4CFMACXX:7:2315:19319:428582	93.75	80	3	2	1	79	54773	54851	1e-29	119
HWI-ST942:56:C4CFMACXX:7:2315:19319:428582	100.00	38	0	0	62	99	54889	54852	4e-15	71.3
HWI-ST942:56:C4CFMACXX:7:2315:19904:168082	93.33	45	2	1	1	44	91112	91068	2e-13	65.8
HWI-ST942:56:C4CFMACXX:7:2315:19904:168082	100.00	70	0	0	31	100	111158	111227	6e-33	130
HWI-ST942:56:C4CFMACXX:7:2315:4160:680681	100.00	78	0	0	1	78	126426	126503	2e-37	145
HWI-ST942:56:C4CFMACXX:7:2315:4160:680681	96.00	25	1	0	75	99	106801	106825	3e-06	41.7
HWI-ST942:56:C4CFMACXX:7:2315:6308:471672	98.25	57	1	0	1	57	91955	91899	5e-24	100
HWI-ST942:56:C4CFMACXX:7:2315:6308:471672	100.00	47	0	0	54	100	115332	115378	4e-20	87.9
HWI-ST942:56:C4CFMACXX:7:2315:7854:64112	97.92	48	1	0	1	48	23342	23389	5e-19	84.2
HWI-ST942:56:C4CFMACXX:7:2315:7854:64112	100.00	52	0	0	49	100	23411	23360	6e-23	97.1
HWI-ST942:56:C4CFMACXX:7:2315:8569:520522	100.00	69	0	0	1	69	95232	95300	2e-32	128
HWI-ST942:56:C4CFMACXX:7:2315:8569:520522	100.00	30	0	0	70	99	82442	82413	1e-10	56.5
HWI-ST942:56:C4CFMACXX:7:2316:11137:69072	100.00	30	0	0	1	30	60527	60556	1e-10	56.5
HWI-ST942:56:C4CFMACXX:7:2316:11137:69072	100.00	78	0	0	23	100	60594	60517	2e-37	145
HWI-ST942:56:C4CFMACXX:7:2316:11879:361031	100.00	39	0	0	1	39	91385	91347	1e-15	73.1
HWI-ST942:56:C4CFMACXX:7:2316:11879:361031	100.00	72	0	0	29	100	70174	70245	5e-34	134
HWI-ST942:56:C4CFMACXX:7:2316:11879:361032	100.00	82	0	0	1	82	70255	70174	1e-39	152
HWI-ST942:56:C4CFMACXX:7:2316:11879:361032	100.00	29	0	0	72	100	91347	91375	4e-10	54.7
HWI-ST942:56:C4CFMACXX:7:2316:14087:124352	91.30	46	2	1	1	44	30613	30658	2e-12	62.1
HWI-ST942:56:C4CFMACXX:7:2316:14087:124352	100.00	73	0	0	27	99	30719	30647	1e-34	135
HWI-ST942:56:C4CFMACXX:7:2316:19325:380421	100.00	80	0	0	1	80	102732	102653	2e-38	148
HWI-ST942:56:C4CFMACXX:7:2316:19325:380421	100.00	21	0	0	80	100	777	797	1e-05	39.9
HWI-ST942:56:C4CFMACXX:7:2316:20539:924591	100.00	81	0	0	1	81	95999	96079	5e-39	150
HWI-ST942:56:C4CFMACXX:7:2316:20539:924591	100.00	21	0	0	80	100	13938	13958	1e-05	39.9
HWI-ST942:56:C4CFMACXX:7:2316:6226:462572	98.80	83	1	0	1	83	14346	14428	2e-38	148
HWI-ST942:56:C4CFMACXX:7:2316:6226:462572	100.00	20	0	0	81	100	45752	45771	4e-05	38.1
HWI-ST942:56:C4CFMACXX:7:2316:6295:970022	100.00	44	0	0	1	44	58020	58063	2e-18	82.4
HWI-ST942:56:C4CFMACXX:7:2316:6295:970022	100.00	62	0	0	39	100	58102	58041	2e-28	115
HWI-ST942:56:C4CFMACXX:8:1101:15606:731801	100.00	81	0	0	1	81	15355	15435	5e-39	150
HWI-ST942:56:C4CFMACXX:8:1101:15606:731801	100.00	28	0	0	73	100	82183	82210	1e-09	52.8
HWI-ST942:56:C4CFMACXX:8:1101:17998:704622	100.00	74	0	0	1	74	127606	127679	3e-35	137
HWI-ST942:56:C4CFMACXX:8:1101:17998:704622	100.00	28	0	0	68	95	38435	38462	1e-09	52.8
HWI-ST942:56:C4CFMACXX:8:1101:19282:493312	100.00	38	0	0	1	38	41741	41704	4e-15	71.3
HWI-ST942:56:C4CFMACXX:8:1101:19282:493312	100.00	63	0	0	38	100	105300	105362	5e-29	117
HWI-ST942:56:C4CFMACXX:8:1101:20911:89391	100.00	73	0	0	1	73	56916	56988	1e-34	135
HWI-ST942:56:C4CFMACXX:8:1101:20911:89391	96.77	31	0	1	69	98	3410	3440	5e-09	51.0
HWI-ST942:56:C4CFMACXX:8:1101:6050:181901	100.00	59	0	0	1	59	91217	91275	8e-27	110
HWI-ST942:56:C4CFMACXX:8:1101:6050:181901	90.16	61	5	1	41	100	11700	11640	2e-17	78.7
HWI-ST942:56:C4CFMACXX:8:1102:14244:59912	93.06	72	3	1	1	72	28376	28307	4e-25	104
HWI-ST942:56:C4CFMACXX:8:1102:14244:59912	100.00	46	0	0	55	100	36900	36945	1e-19	86.1
HWI-ST942:56:C4CFMACXX:8:1102:14535:657001	100.00	48	0	0	1	48	76092	76139	1e-20	89.8
HWI-ST942:56:C4CFMACXX:8:1102:14535:657001	100.00	54	0	0	47	100	12370	12423	5e-24	100
HWI-ST942:56:C4CFMACXX:8:1102:18506:590192	100.00	24	0	0	1	24	121129	121152	2e-07	45.4
HWI-ST942:56:C4CFMACXX:8:1102:18506:590192	100.00	82	0	0	18	99	121195	121114	1e-39	152
HWI-ST942:56:C4CFMACXX:8:1102:18570:574281	100.00	64	0	0	1	64	106204	106141	1e-29	119
HWI-ST942:56:C4CFMACXX:8:1102:18570:574281	100.00	36	0	0	65	100	34999	34964	5e-14	67.6
HWI-ST942:56:C4CFMACXX:8:1102:4549:588361	100.00	73	0	0	1	73	105562	105490	1e-34	135
HWI-ST942:56:C4CFMACXX:8:1102:4549:588361	89.80	49	0	5	53	100	105082	105038	3e-11	58.4
HWI-ST942:56:C4CFMACXX:8:1102:8436:587072	100.00	30	0	0	1	30	125747	125718	1e-10	56.5
HWI-ST942:56:C4CFMACXX:8:1102:8436:587072	100.00	70	0	0	31	100	125718	125787	6e-33	130
HWI-ST942:56:C4CFMACXX:8:1102:8537:175432	97.87	47	0	1	1	47	48667	48712	6e-18	80.5
HWI-ST942:56:C4CFMACXX:8:1102:8537:175432	100.00	60	0	0	41	100	48739	48680	2e-27	111
HWI-ST942:56:C4CFMACXX:8:1103:10045:166102	95.65	46	2	0	1	46	7426	7381	3e-16	75.0
HWI-ST942:56:C4CFMACXX:8:1103:10045:166102	100.00	69	0	0	31	99	7381	7449	2e-32	128
HWI-ST942:56:C4CFMACXX:8:1103:10475:226422	100.00	49	0	0	4	52	29328	29376	3e-21	91.6
HWI-ST942:56:C4CFMACXX:8:1103:10475:226422	100.00	52	0	0	49	100	109741	109690	6e-23	97.1
HWI-ST942:56:C4CFMACXX:8:1103:12634:790942	100.00	70	0	0	1	70	84240	84171	6e-33	130
HWI-ST942:56:C4CFMACXX:8:1103:12634:790942	100.00	29	0	0	71	99	1	29	4e-10	54.7
HWI-ST942:56:C4CFMACXX:8:1103:12889:182032	94.12	34	2	0	1	34	16375	16342	1e-09	52.8
HWI-ST942:56:C4CFMACXX:8:1103:12889:182032	100.00	74	0	0	26	99	16279	16352	4e-35	137
HWI-ST942:56:C4CFMACXX:8:1103:13145:901742	100.00	80	0	0	1	80	82385	82464	2e-38	148
HWI-ST942:56:C4CFMACXX:8:1103:13145:901742	100.00	31	0	0	69	99	7918	7888	3e-11	58.4
HWI-ST942:56:C4CFMACXX:8:1103:16604:596421	100.00	60	0	0	1	60	65847	65906	2e-27	111
HWI-ST942:56:C4CFMACXX:8:1103:16604:596421	100.00	37	0	0	60	96	65396	65432	1e-14	69.4
HWI-ST942:56:C4CFMACXX:8:1103:17016:423381	100.00	29	0	0	1	29	26579	26551	4e-10	54.7
HWI-ST942:56:C4CFMACXX:8:1103:17016:423381	100.00	79	0	0	22	100	27002	26924	6e-38	147
HWI-ST942:56:C4CFMACXX:8:1103:5180:752102	100.00	44	0	0	1	44	123647	123690	2e-18	82.4
HWI-ST942:56:C4CFMACXX:8:1103:5180:752102	100.00	61	0	0	39	99	123702	123642	6e-28	113
HWI-ST942:56:C4CFMACXX:8:1103:6177:76732	100.00	44	0	0	1	44	59671	59628	2e-18	82.4
HWI-ST942:56:C4CFMACXX:8:1103:6177:76732	100.00	61	0	0	40	100	59565	59625	6e-28	113
HWI-ST942:56:C4CFMACXX:8:1104:19167:932301	100.00	74	0	0	1	74	94629	94702	4e-35	137
HWI-ST942:56:C4CFMACXX:8:1104:19167:932301	100.00	26	0	0	75	100	113607	113582	2e-08	49.1
HWI-ST942:56:C4CFMACXX:8:1104:2450:348932	98.59	71	1	0	1	71	100082	100012	8e-32	126
HWI-ST942:56:C4CFMACXX:8:1104:2450:348932	96.97	33	1	0	68	100	71451	71483	1e-10	56.5
HWI-ST942:56:C4CFMACXX:8:1104:7141:794662	100.00	81	0	0	1	81	127781	127701	5e-39	150
HWI-ST942:56:C4CFMACXX:8:1104:7141:794662	100.00	22	0	0	79	100	108076	108055	3e-06	41.7
HWI-ST942:56:C4CFMACXX:8:1105:11133:544992	100.00	72	0	0	1	72	71105	71176	5e-34	134
HWI-ST942:56:C4CFMACXX:8:1105:11133:544992	94.44	36	1	1	64	98	31676	31711	4e-10	54.7
HWI-ST942:56:C4CFMACXX:8:1105:13993:618801	100.00	77	0	0	1	77	22062	22138	8e-37	143
HWI-ST942:56:C4CFMACXX:8:1105:13993:618801	100.00	23	0	0	78	100	13392	13414	8e-07	43.6
HWI-ST942:56:C4CFMACXX:8:1105:16929:890872	100.00	69	0	0	1	69	49463	49531	2e-32	128
HWI-ST942:56:C4CFMACXX:8:1105:16929:890872	95.45	44	1	1	56	99	119521	119563	1e-14	69.4
HWI-ST942:56:C4CFMACXX:8:1105:17457:720892	100.00	84	0	0	1	84	86756	86839	1e-40	156
HWI-ST942:56:C4CFMACXX:8:1105:17457:720892	100.00	26	0	0	75	100	98525	98550	2e-08	49.1
HWI-ST942:56:C4CFMACXX:8:1105:20775:820912	97.62	84	1	1	1	83	110049	109966	8e-37	143
HWI-ST942:56:C4CFMACXX:8:1105:20775:820912	100.00	32	0	0	69	100	64873	64842	8e-12	60.2
HWI-ST942:56:C4CFMACXX:8:1105:3752:110072	100.00	85	0	0	1	85	127464	127380	3e-41	158
HWI-ST942:56:C4CFMACXX:8:1105:3752:110072	100.00	20	0	0	77	96	58094	58113	4e-05	38.1
HWI-ST942:56:C4CFMACXX:8:1105:5652:592582	100.00	77	0	0	1	77	102329	102253	8e-37	143
HWI-ST942:56:C4CFMACXX:8:1105:5652:592582	100.00	25	0	0	76	100	18271	18247	6e-08	47.3
HWI-ST942:56:C4CFMACXX:8:1106:10382:747012	100.00	44	0	0	1	44	120150	120193	2e-18	82.4
HWI-ST942:56:C4CFMACXX:8:1106:10382:747012	100.00	53	0	0	33	85	120193	120141	2e-23	99.0
HWI-ST942:56:C4CFMACXX:8:1106:11931:336661	100.00	43	0	0	1	43	124423	124381	6e-18	80.5
HWI-ST942:56:C4CFMACXX:8:1106:11931:336661	100.00	57	0	0	44	100	122151	122095	1e-25	106
HWI-ST942:56:C4CFMACXX:8:1106:11931:336662	100.00	62	0	0	1	62	122090	122151	2e-28	115
HWI-ST942:56:C4CFMACXX:8:1106:11931:336662	100.00	38	0	0	63	100	124381	124418	4e-15	71.3
HWI-ST942:56:C4CFMACXX:8:1106:12263:920352	100.00	35	0	0	1	35	69516	69482	2e-13	65.8
HWI-ST942:56:C4CFMACXX:8:1106:12263:920352	100.00	67	0	0	34	100	69468	69534	3e-31	124
HWI-ST942:56:C4CFMACXX:8:1106:15071:148352	92.86	56	0	2	1	54	50942	50995	2e-17	78.7
HWI-ST942:56:C4CFMACXX:8:1106:15071:148352	100.00	72	0	0	29	100	50995	50924	5e-34	134
HWI-ST942:56:C4CFMACXX:8:1106:16979:575911	100.00	74	0	0	1	74	96248	96321	4e-35	137
HWI-ST942:56:C4CFMACXX:8:1106:16979:575911	91.49	47	3	1	55	100	42049	42095	6e-13	63.9
HWI-ST942:56:C4CFMACXX:8:1106:17790:530562	100.00	30	0	0	1	30	29732	29761	1e-10	56.5
HWI-ST942:56:C4CFMACXX:8:1106:17790:530562	100.00	65	0	0	24	88	29781	29717	4e-30	121
HWI-ST942:56:C4CFMACXX:8:1106:4470:805922	100.00	24	0	0	1	24	111179	111202	2e-07	45.4
HWI-ST942:56:C4CFMACXX:8:1106:4470:805922	100.00	76	0	0	25	100	126033	126108	3e-36	141
HWI-ST942:56:C4CFMACXX:8:1107:11272:930121	100.00	26	0	0	1	26	119481	119506	2e-08	49.1
HWI-ST942:56:C4CFMACXX:8:1107:11272:930121	100.00	67	0	0	26	92	121701	121635	3e-31	124
HWI-ST942:56:C4CFMACXX:8:1107:12054:707781	100.00	34	0	0	1	34	50480	50513	5e-13	63.9
HWI-ST942:56:C4CFMACXX:8:1107:12054:707781	100.00	57	0	0	32	88	50442	50498	9e-26	106
HWI-ST942:56:C4CFMACXX:8:1107:12054:707782	100.00	57	0	0	1	57	50498	50442	9e-26	106
HWI-ST942:56:C4CFMACXX:8:1107:12054:707782	100.00	34	0	0	55	88	50513	50480	5e-13	63.9
HWI-ST942:56:C4CFMACXX:8:1107:1208:555552	100.00	75	0	0	1	75	85448	85374	1e-35	139
HWI-ST942:56:C4CFMACXX:8:1107:1208:555552	100.00	25	0	0	76	100	65937	65961	6e-08	47.3
HWI-ST942:56:C4CFMACXX:8:1107:12767:424182	97.53	81	2	0	1	81	22676	22756	1e-35	139
HWI-ST942:56:C4CFMACXX:8:1107:12767:424182	100.00	32	0	0	69	100	72846	72815	8e-12	60.2
HWI-ST942:56:C4CFMACXX:8:1107:15292:854351	100.00	65	0	0	1	65	88879	88815	4e-30	121
HWI-ST942:56:C4CFMACXX:8:1107:15292:854351	100.00	41	0	0	60	100	44979	45019	8e-17	76.8
HWI-ST942:56:C4CFMACXX:8:1107:16945:951512	100.00	84	0	0	1	84	125592	125509	1e-40	156
HWI-ST942:56:C4CFMACXX:8:1107:16945:951512	96.77	31	0	1	69	99	125637	125608	5e-09	51.0
HWI-ST942:56:C4CFMACXX:8:1107:3522:537172	93.02	43	3	0	1	43	59384	59342	6e-13	63.9
HWI-ST942:56:C4CFMACXX:8:1107:3522:537172	98.65	74	1	0	27	100	59342	59415	2e-33	132
HWI-ST942:56:C4CFMACXX:8:1107:4846:784001	100.00	25	0	0	1	25	82832	82856	6e-08	47.3
HWI-ST942:56:C4CFMACXX:8:1107:4846:784001	100.00	85	0	0	16	100	81402	81486	3e-41	158
HWI-ST942:56:C4CFMACXX:8:1107:5695:691471	100.00	44	0	0	1	44	101485	101442	2e-18	82.4
HWI-ST942:56:C4CFMACXX:8:1107:5695:691471	100.00	56	0	0	45	100	101549	101494	4e-25	104
HWI-ST942:56:C4CFMACXX:8:1108:11974:932812	100.00	70	0	0	1	70	90458	90389	6e-33	130
HWI-ST942:56:C4CFMACXX:8:1108:11974:932812	100.00	36	0	0	64	99	54970	54935	5e-14	67.6
HWI-ST942:56:C4CFMACXX:8:1108:1820:247492	100.00	29	0	0	1	29	69679	69707	4e-10	54.7
HWI-ST942:56:C4CFMACXX:8:1108:1820:247492	100.00	70	0	0	30	99	69709	69640	6e-33	130
HWI-ST942:56:C4CFMACXX:8:1108:18260:745732	100.00	41	0	0	1	41	96319	96279	8e-17	76.8
HWI-ST942:56:C4CFMACXX:8:1108:18260:745732	100.00	60	0	0	37	96	80309	80250	2e-27	111
HWI-ST942:56:C4CFMACXX:8:1108:2688:727662	100.00	54	0	0	1	54	82090	82037	5e-24	100
HWI-ST942:56:C4CFMACXX:8:1108:2688:727662	100.00	49	0	0	52	100	25459	25507	3e-21	91.6
HWI-ST942:56:C4CFMACXX:8:1108:2740:500981	100.00	75	0	0	1	75	50204	50130	1e-35	139
HWI-ST942:56:C4CFMACXX:8:1108:2740:500981	100.00	26	0	0	75	100	2460	2485	2e-08	49.1
HWI-ST942:56:C4CFMACXX:8:1108:4740:332112	100.00	80	0	0	1	80	95113	95034	2e-38	148
HWI-ST942:56:C4CFMACXX:8:1108:4740:332112	100.00	23	0	0	77	99	4141	4163	8e-07	43.6
HWI-ST942:56:C4CFMACXX:8:1108:5965:801182	100.00	52	0	0	1	52	124618	124567	6e-23	97.1
HWI-ST942:56:C4CFMACXX:8:1108:5965:801182	100.00	51	0	0	50	100	68479	68529	2e-22	95.3
HWI-ST942:56:C4CFMACXX:8:1109:11960:867411	100.00	68	0	0	1	68	100372	100305	8e-32	126
HWI-ST942:56:C4CFMACXX:8:1109:11960:867411	100.00	32	0	0	69	100	100386	100355	8e-12	60.2
HWI-ST942:56:C4CFMACXX:8:1109:11960:867412	100.00	45	0	0	1	45	100342	100386	5e-19	84.2
HWI-ST942:56:C4CFMACXX:8:1109:11960:867412	100.00	55	0	0	46	100	100305	100359	1e-24	102
HWI-ST942:56:C4CFMACXX:8:1109:16180:166832	93.75	80	3	2	1	80	119901	119824	1e-29	119
HWI-ST942:56:C4CFMACXX:8:1109:16180:166832	100.00	41	0	0	57	97	119808	119848	8e-17	76.8
HWI-ST942:56:C4CFMACXX:8:1109:20486:82381	100.00	63	0	0	1	63	65082	65020	5e-29	117
HWI-ST942:56:C4CFMACXX:8:1109:20486:82381	100.00	39	0	0	62	100	111557	111519	1e-15	73.1
HWI-ST942:56:C4CFMACXX:8:1109:21159:953531	98.00	50	1	0	1	50	24239	24190	4e-20	87.9
HWI-ST942:56:C4CFMACXX:8:1109:21159:953531	94.59	74	2	2	28	100	41170	41098	6e-28	113
HWI-ST942:56:C4CFMACXX:8:1109:3812:949922	86.90	84	4	7	1	80	10344	10264	4e-20	87.9
HWI-ST942:56:C4CFMACXX:8:1109:3812:949922	98.57	70	0	1	32	100	10264	10333	1e-30	122
HWI-ST942:56:C4CFMACXX:8:1109:9220:68952	100.00	43	0	0	1	43	126619	126577	6e-18	80.5
HWI-ST942:56:C4CFMACXX:8:1109:9220:68952	100.00	63	0	0	38	100	126541	126603	5e-29	117
HWI-ST942:56:C4CFMACXX:8:1110:13681:358091	100.00	27	0	0	1	27	122686	122712	5e-09	51.0
HWI-ST942:56:C4CFMACXX:8:1110:13681:358091	100.00	73	0	0	28	100	39057	38985	1e-34	135
HWI-ST942:56:C4CFMACXX:8:1110:17230:170492	100.00	44	0	0	1	44	81212	81169	2e-18	82.4
HWI-ST942:56:C4CFMACXX:8:1110:17230:170492	100.00	61	0	0	39	99	81134	81194	6e-28	113
HWI-ST942:56:C4CFMACXX:8:1110:18600:195122	94.51	91	5	0	1	91	124167	124257	3e-36	141
HWI-ST942:56:C4CFMACXX:8:1110:18600:195122	100.00	29	0	0	71	99	126029	126001	4e-10	54.7
HWI-ST942:56:C4CFMACXX:8:1110:19714:394821	100.00	60	0	0	1	60	105158	105217	2e-27	111
HWI-ST942:56:C4CFMACXX:8:1110:19714:394821	100.00	41	0	0	60	100	85450	85490	8e-17	76.8
HWI-ST942:56:C4CFMACXX:8:1110:20727:863602	95.51	89	3	1	1	89	99437	99350	3e-36	141
HWI-ST942:56:C4CFMACXX:8:1110:20727:863602	85.42	48	2	4	57	99	46633	46586	2e-07	45.4
HWI-ST942:56:C4CFMACXX:8:1110:3042:617441	100.00	88	0	0	1	88	37106	37193	6e-43	163
HWI-ST942:56:C4CFMACXX:8:1110:3042:617441	93.10	29	2	0	72	100	115642	115670	8e-07	43.6
HWI-ST942:56:C4CFMACXX:8:1110:8584:537881	100.00	80	0	0	1	80	61361	61282	2e-38	148
HWI-ST942:56:C4CFMACXX:8:1110:8584:537881	100.00	21	0	0	80	100	73814	73834	1e-05	39.9
HWI-ST942:56:C4CFMACXX:8:1111:13057:955452	100.00	73	0	0	1	73	37964	38036	1e-34	135
HWI-ST942:56:C4CFMACXX:8:1111:13057:955452	100.00	28	0	0	73	100	23424	23397	1e-09	52.8
HWI-ST942:56:C4CFMACXX:8:1111:17908:337032	96.55	29	1	0	1	29	38224	38196	2e-08	49.1
HWI-ST942:56:C4CFMACXX:8:1111:17908:337032	100.00	80	0	0	21	100	50430	50351	2e-38	148
HWI-ST942:56:C4CFMACXX:8:1111:9969:570332	100.00	25	0	0	1	25	103398	103374	6e-08	47.3
HWI-ST942:56:C4CFMACXX:8:1111:9969:570332	100.00	80	0	0	20	99	103321	103400	2e-38	148
HWI-ST942:56:C4CFMACXX:8:1112:11479:30422	100.00	66	0	0	1	66	58107	58172	1e-30	122
HWI-ST942:56:C4CFMACXX:8:1112:11479:30422	100.00	40	0	0	61	100	66917	66956	3e-16	75.0
HWI-ST942:56:C4CFMACXX:8:1112:11576:319562	97.92	48	1	0	1	48	95764	95717	5e-19	84.2
HWI-ST942:56:C4CFMACXX:8:1112:11576:319562	100.00	63	0	0	38	100	95717	95779	5e-29	117
HWI-ST942:56:C4CFMACXX:8:1112:14920:526451	95.95	74	2	1	1	73	25731	25658	1e-29	119
HWI-ST942:56:C4CFMACXX:8:1112:14920:526451	100.00	39	0	0	62	100	29184	29146	1e-15	73.1
HWI-ST942:56:C4CFMACXX:8:1112:16560:169451	100.00	64	0	0	1	64	94101	94164	1e-29	119
HWI-ST942:56:C4CFMACXX:8:1112:16560:169451	100.00	37	0	0	64	100	51332	51368	1e-14	69.4
HWI-ST942:56:C4CFMACXX:8:1112:16933:871002	100.00	66	0	0	1	66	48394	48329	1e-30	122
HWI-ST942:56:C4CFMACXX:8:1112:16933:871002	100.00	37	0	0	63	99	5986	5950	1e-14	69.4
HWI-ST942:56:C4CFMACXX:8:1112:16983:138281	100.00	67	0	0	1	67	58190	58124	3e-31	124
HWI-ST942:56:C4CFMACXX:8:1112:16983:138281	100.00	26	0	0	68	93	71425	71450	2e-08	49.1
HWI-ST942:56:C4CFMACXX:8:1112:18616:943482	100.00	33	0	0	1	33	124213	124181	2e-12	62.1
HWI-ST942:56:C4CFMACXX:8:1112:18616:943482	98.25	57	1	0	44	100	124261	124205	5e-24	100
HWI-ST942:56:C4CFMACXX:8:1112:3699:161092	95.74	47	1	1	1	47	109175	109130	3e-16	75.0
HWI-ST942:56:C4CFMACXX:8:1112:3699:161092	100.00	68	0	0	33	100	93497	93430	8e-32	126
HWI-ST942:56:C4CFMACXX:8:1112:4790:316632	100.00	76	0	0	1	76	28414	28339	3e-36	141
HWI-ST942:56:C4CFMACXX:8:1112:4790:316632	100.00	26	0	0	75	100	126054	126079	2e-08	49.1
HWI-ST942:56:C4CFMACXX:8:1113:10669:212742	100.00	77	0	0	1	77	73695	73771	8e-37	143
HWI-ST942:56:C4CFMACXX:8:1113:10669:212742	100.00	26	0	0	75	100	119699	119674	2e-08	49.1
HWI-ST942:56:C4CFMACXX:8:1113:11325:260081	100.00	71	0	0	1	71	39768	39838	2e-33	132
HWI-ST942:56:C4CFMACXX:8:1113:11325:260081	100.00	30	0	0	71	100	116917	116946	1e-10	56.5
HWI-ST942:56:C4CFMACXX:8:1113:17819:132341	100.00	67	0	0	1	67	8461	8527	3e-31	124
HWI-ST942:56:C4CFMACXX:8:1113:17819:132341	95.12	41	1	1	61	100	102836	102876	6e-13	63.9
HWI-ST942:56:C4CFMACXX:8:1113:17819:132342	96.43	56	1	1	1	55	102891	102836	3e-21	91.6
HWI-ST942:56:C4CFMACXX:8:1113:17819:132342	100.00	51	0	0	49	99	8527	8477	2e-22	95.3
HWI-ST942:56:C4CFMACXX:8:1113:3727:105022	95.31	64	1	2	1	64	28120	28181	5e-24	100
HWI-ST942:56:C4CFMACXX:8:1113:3727:105022	100.00	52	0	0	48	99	63689	63740	6e-23	97.1
HWI-ST942:56:C4CFMACXX:8:1113:8030:219571	100.00	73	0	0	1	73	59594	59522	1e-34	135
HWI-ST942:56:C4CFMACXX:8:1113:8030:219571	100.00	27	0	0	73	99	20376	20402	5e-09	51.0
HWI-ST942:56:C4CFMACXX:8:1113:8030:219572	100.00	69	0	0	1	69	20444	20376	2e-32	128
HWI-ST942:56:C4CFMACXX:8:1113:8030:219572	100.00	31	0	0	69	99	59522	59552	3e-11	58.4
HWI-ST942:56:C4CFMACXX:8:1114:10629:867901	100.00	62	0	0	1	62	45291	45352	2e-28	115
HWI-ST942:56:C4CFMACXX:8:1114:10629:867901	100.00	29	0	0	62	90	93736	93708	3e-10	54.7
HWI-ST942:56:C4CFMACXX:8:1114:14287:482012	100.00	74	0	0	1	74	105374	105301	4e-35	137
HWI-ST942:56:C4CFMACXX:8:1114:14287:482012	100.00	33	0	0	68	100	17765	17733	2e-12	62.1
HWI-ST942:56:C4CFMACXX:8:1114:16932:580531	100.00	84	0	0	1	84	64804	64721	1e-40	156
HWI-ST942:56:C4CFMACXX:8:1114:16932:580531	100.00	21	0	0	80	100	113011	112991	1e-05	39.9
HWI-ST942:56:C4CFMACXX:8:1114:18481:184452	87.76	49	3	3	1	47	93566	93519	4e-10	54.7
HWI-ST942:56:C4CFMACXX:8:1114:18481:184452	100.00	77	0	0	24	100	87261	87185	8e-37	143
HWI-ST942:56:C4CFMACXX:8:1114:5789:237262	100.00	56	0	0	1	56	67219	67164	4e-25	104
HWI-ST942:56:C4CFMACXX:8:1114:5789:237262	92.86	28	1	1	69	95	99380	99353	1e-05	39.9
HWI-ST942:56:C4CFMACXX:8:1114:7571:448732	100.00	67	0	0	1	67	36007	36073	3e-31	124
HWI-ST942:56:C4CFMACXX:8:1114:7571:448732	100.00	41	0	0	58	98	124780	124740	8e-17	76.8
HWI-ST942:56:C4CFMACXX:8:1115:10393:882152	100.00	56	0	0	1	56	31374	31429	4e-25	104
HWI-ST942:56:C4CFMACXX:8:1115:10393:882152	100.00	53	0	0	46	98	66511	66459	2e-23	99.0
HWI-ST942:56:C4CFMACXX:8:1115:13633:33232	100.00	42	0	0	1	42	75650	75691	2e-17	78.7
HWI-ST942:56:C4CFMACXX:8:1115:13633:33232	100.00	68	0	0	33	100	86995	86928	8e-32	126
HWI-ST942:56:C4CFMACXX:8:1115:1374:367661	95.00	40	2	0	1	40	13687	13726	6e-13	63.9
HWI-ST942:56:C4CFMACXX:8:1115:1374:367661	91.67	60	3	2	40	98	13715	13773	2e-18	82.4
HWI-ST942:56:C4CFMACXX:8:1115:17721:298351	98.70	77	1	0	1	77	6226	6150	3e-35	137
HWI-ST942:56:C4CFMACXX:8:1115:17721:298351	100.00	21	0	0	76	96	96050	96030	1e-05	39.9
HWI-ST942:56:C4CFMACXX:8:1115:18684:206822	94.87	39	2	0	1	39	102133	102171	2e-12	62.1
HWI-ST942:56:C4CFMACXX:8:1115:18684:206822	100.00	68	0	0	33	100	102216	102149	8e-32	126
HWI-ST942:56:C4CFMACXX:8:1115:19715:781341	100.00	72	0	0	1	72	113719	113790	5e-34	134
HWI-ST942:56:C4CFMACXX:8:1115:19715:781341	96.43	28	1	0	73	100	97055	97082	6e-08	47.3
HWI-ST942:56:C4CFMACXX:8:1115:19863:506302	100.00	24	0	0	1	24	74591	74614	2e-07	45.4
HWI-ST942:56:C4CFMACXX:8:1115:19863:506302	98.68	76	1	0	25	100	74614	74539	1e-34	135
HWI-ST942:56:C4CFMACXX:8:1115:4153:390381	100.00	32	0	0	1	32	107309	107278	8e-12	60.2
HWI-ST942:56:C4CFMACXX:8:1115:4153:390381	100.00	70	0	0	29	98	107278	107347	6e-33	130
HWI-ST942:56:C4CFMACXX:8:1115:6002:119032	100.00	49	0	0	1	49	25914	25962	3e-21	91.6
HWI-ST942:56:C4CFMACXX:8:1115:6002:119032	100.00	61	0	0	40	100	87358	87298	6e-28	113
HWI-ST942:56:C4CFMACXX:8:1115:7578:624152	96.88	32	1	0	1	32	82934	82965	4e-10	54.7
HWI-ST942:56:C4CFMACXX:8:1115:7578:624152	100.00	74	0	0	27	100	82999	82926	4e-35	137
HWI-ST942:56:C4CFMACXX:8:1115:9085:539912	100.00	31	0	0	3	33	9938	9908	3e-11	58.4
HWI-ST942:56:C4CFMACXX:8:1115:9085:539912	100.00	69	0	0	32	100	9888	9956	2e-32	128
HWI-ST942:56:C4CFMACXX:8:1115:9098:654471	100.00	29	0	0	1	29	113061	113033	4e-10	54.7
HWI-ST942:56:C4CFMACXX:8:1115:9098:654471	100.00	67	0	0	30	96	113032	113098	3e-31	124
HWI-ST942:56:C4CFMACXX:8:1116:10742:192062	100.00	27	0	0	1	27	48728	48754	5e-09	51.0
HWI-ST942:56:C4CFMACXX:8:1116:10742:192062	100.00	77	0	0	24	100	48820	48744	8e-37	143
HWI-ST942:56:C4CFMACXX:8:1116:11783:425842	95.83	24	1	0	1	24	38183	38206	1e-05	39.9
HWI-ST942:56:C4CFMACXX:8:1116:11783:425842	100.00	78	0	0	22	99	38224	38147	2e-37	145
HWI-ST942:56:C4CFMACXX:8:1116:12813:403652	100.00	82	0	0	1	82	39031	39112	1e-39	152
HWI-ST942:56:C4CFMACXX:8:1116:12813:403652	96.00	25	1	0	76	100	34420	34444	3e-06	41.7
HWI-ST942:56:C4CFMACXX:8:1116:16997:981332	100.00	23	0	0	1	23	28142	28164	8e-07	43.6
HWI-ST942:56:C4CFMACXX:8:1116:16997:981332	100.00	79	0	0	21	99	28311	28233	6e-38	147
HWI-ST942:56:C4CFMACXX:8:1116:17708:131372	97.59	83	2	0	1	83	31731	31649	8e-37	143
HWI-ST942:56:C4CFMACXX:8:1116:17708:131372	82.22	45	6	2	55	97	126498	126454	4e-05	38.1
HWI-ST942:56:C4CFMACXX:8:1116:6587:363371	100.00	49	0	0	1	49	38276	38324	3e-21	91.6
HWI-ST942:56:C4CFMACXX:8:1116:6587:363371	100.00	50	0	0	47	96	90770	90819	8e-22	93.5
HWI-ST942:56:C4CFMACXX:8:1116:7393:993242	98.44	64	1	0	1	64	82658	82595	6e-28	113
HWI-ST942:56:C4CFMACXX:8:1116:7393:993242	100.00	51	0	0	49	99	66317	66267	2e-22	95.3
HWI-ST942:56:C4CFMACXX:8:1116:8678:189311	100.00	83	0	0	1	83	117001	116919	4e-40	154
HWI-ST942:56:C4CFMACXX:8:1116:8678:189311	100.00	20	0	0	81	100	29214	29195	4e-05	38.1
HWI-ST942:56:C4CFMACXX:8:1201:10041:522851	100.00	76	0	0	4	79	3766	3841	3e-36	141
HWI-ST942:56:C4CFMACXX:8:1201:10041:522851	100.00	22	0	0	79	100	111219	111198	3e-06	41.7
HWI-ST942:56:C4CFMACXX:8:1201:10951:317512	98.41	63	0	1	1	62	34578	34640	8e-27	110
HWI-ST942:56:C4CFMACXX:8:1201:10951:317512	100.00	50	0	0	49	98	106915	106964	8e-22	93.5
HWI-ST942:56:C4CFMACXX:8:1201:12412:528442	100.00	73	0	0	1	73	22412	22484	1e-34	135
HWI-ST942:56:C4CFMACXX:8:1201:12412:528442	96.30	27	1	0	74	100	115629	115655	2e-07	45.4
HWI-ST942:56:C4CFMACXX:8:1201:19967:152552	90.70	43	3	1	1	42	2667	2625	1e-10	56.5
HWI-ST942:56:C4CFMACXX:8:1201:19967:152552	98.65	74	1	0	27	100	2551	2624	2e-33	132
HWI-ST942:56:C4CFMACXX:8:1201:3118:691772	100.00	78	0	0	1	78	83010	82933	2e-37	145
HWI-ST942:56:C4CFMACXX:8:1201:3118:691772	100.00	22	0	0	79	100	107530	107551	3e-06	41.7
HWI-ST942:56:C4CFMACXX:8:1201:4290:103451	100.00	66	0	0	1	66	63559	63494	1e-30	122
HWI-ST942:56:C4CFMACXX:8:1201:4290:103451	97.37	38	0	1	64	100	10576	10539	6e-13	63.9
HWI-ST942:56:C4CFMACXX:8:1201:4670:85531	100.00	73	0	0	1	73	93108	93180	1e-34	135
HWI-ST942:56:C4CFMACXX:8:1201:4670:85531	100.00	28	0	0	73	100	85251	85224	1e-09	52.8
HWI-ST942:56:C4CFMACXX:8:1202:10514:813342	100.00	23	0	0	1	23	42429	42451	8e-07	43.6
HWI-ST942:56:C4CFMACXX:8:1202:10514:813342	100.00	81	0	0	19	99	107019	107099	5e-39	150
HWI-ST942:56:C4CFMACXX:8:1202:11227:846502	96.72	61	2	0	1	61	4489	4429	1e-24	102
HWI-ST942:56:C4CFMACXX:8:1202:11227:846502	100.00	59	0	0	42	100	4429	4487	8e-27	110
HWI-ST942:56:C4CFMACXX:8:1202:17367:984301	98.75	80	0	1	1	79	30230	30309	3e-36	141
HWI-ST942:56:C4CFMACXX:8:1202:17367:984301	100.00	21	0	0	79	99	84304	84284	1e-05	39.9
HWI-ST942:56:C4CFMACXX:8:1202:17755:271352	97.96	49	1	0	1	49	25945	25897	1e-19	86.1
HWI-ST942:56:C4CFMACXX:8:1202:17755:271352	100.00	61	0	0	40	100	37928	37868	6e-28	113
HWI-ST942:56:C4CFMACXX:8:1202:21036:962971	100.00	62	0	0	1	62	14914	14975	2e-28	115
HWI-ST942:56:C4CFMACXX:8:1202:21036:962971	100.00	40	0	0	61	100	18805	18844	3e-16	75.0
HWI-ST942:56:C4CFMACXX:8:1202:2137:317982	97.83	46	1	0	1	46	21557	21512	6e-18	80.5
HWI-ST942:56:C4CFMACXX:8:1202:2137:317982	96.77	62	2	0	39	100	21495	21556	4e-25	104
HWI-ST942:56:C4CFMACXX:8:1202:2356:785352	100.00	61	0	0	1	61	83992	84052	6e-28	113
HWI-ST942:56:C4CFMACXX:8:1202:2356:785352	100.00	42	0	0	59	100	15838	15879	2e-17	78.7
HWI-ST942:56:C4CFMACXX:8:1202:4413:984402	100.00	29	0	0	1	29	78864	78836	3e-10	54.7
HWI-ST942:56:C4CFMACXX:8:1202:4413:984402	100.00	64	0	0	30	93	78839	78902	1e-29	119
HWI-ST942:56:C4CFMACXX:8:1202:4509:125771	100.00	74	0	0	1	74	115531	115458	4e-35	137
HWI-ST942:56:C4CFMACXX:8:1202:4509:125771	97.44	39	1	0	62	100	128156	128194	5e-14	67.6
HWI-ST942:56:C4CFMACXX:8:1202:4560:699471	100.00	70	0	0	1	70	14943	14874	6e-33	130
HWI-ST942:56:C4CFMACXX:8:1202:4560:699471	100.00	31	0	0	70	100	12686	12656	3e-11	58.4
HWI-ST942:56:C4CFMACXX:8:1202:9955:485142	100.00	47	0	0	1	47	108273	108227	4e-20	87.9
HWI-ST942:56:C4CFMACXX:8:1202:9955:485142	100.00	53	0	0	48	100	108407	108459	2e-23	99.0
HWI-ST942:56:C4CFMACXX:8:1203:11530:908682	100.00	44	0	0	1	44	15912	15955	2e-18	82.4
HWI-ST942:56:C4CFMACXX:8:1203:11530:908682	100.00	57	0	0	44	100	15953	15897	1e-25	106
HWI-ST942:56:C4CFMACXX:8:1203:11567:381651	100.00	61	0	0	1	61	113140	113080	6e-28	113
HWI-ST942:56:C4CFMACXX:8:1203:11567:381651	100.00	40	0	0	60	99	113161	113122	3e-16	75.0
HWI-ST942:56:C4CFMACXX:8:1203:11567:381652	100.00	55	0	0	1	55	113107	113161	1e-24	102
HWI-ST942:56:C4CFMACXX:8:1203:11567:381652	100.00	46	0	0	54	99	113080	113125	1e-19	86.1
HWI-ST942:56:C4CFMACXX:8:1203:19706:943691	100.00	52	0	0	1	52	65728	65779	6e-23	97.1
HWI-ST942:56:C4CFMACXX:8:1203:19706:943691	98.11	53	1	0	48	100	65666	65718	8e-22	93.5
HWI-ST942:56:C4CFMACXX:8:1203:3971:358841	100.00	54	0	0	1	54	59046	58993	4e-24	100
HWI-ST942:56:C4CFMACXX:8:1203:3971:358841	97.73	44	0	1	50	92	59109	59066	3e-16	75.0
HWI-ST942:56:C4CFMACXX:8:1203:4453:92291	100.00	74	0	0	1	74	99068	98995	3e-35	137
HWI-ST942:56:C4CFMACXX:8:1203:4453:92291	100.00	22	0	0	75	96	34718	34697	3e-06	41.7
HWI-ST942:56:C4CFMACXX:8:1203:4890:607821	100.00	77	0	0	1	77	71311	71387	8e-37	143
HWI-ST942:56:C4CFMACXX:8:1203:4890:607821	92.68	41	3	0	60	100	87036	86996	8e-12	60.2
HWI-ST942:56:C4CFMACXX:8:1203:4890:607822	95.65	69	3	0	1	69	86968	87036	2e-27	111
HWI-ST942:56:C4CFMACXX:8:1203:4890:607822	100.00	49	0	0	52	100	71387	71339	3e-21	91.6
HWI-ST942:56:C4CFMACXX:8:1203:6811:381351	100.00	70	0	0	1	70	31960	32029	6e-33	130
HWI-ST942:56:C4CFMACXX:8:1203:6811:381351	100.00	32	0	0	69	100	63133	63102	8e-12	60.2
HWI-ST942:56:C4CFMACXX:8:1203:9846:90362	100.00	43	0	0	1	43	111638	111596	6e-18	80.5
HWI-ST942:56:C4CFMACXX:8:1203:9846:90362	100.00	59	0	0	42	100	111573	111631	8e-27	110
HWI-ST942:56:C4CFMACXX:8:1204:12935:735361	100.00	64	0	0	1	64	60867	60804	1e-29	119
HWI-ST942:56:C4CFMACXX:8:1204:12935:735361	100.00	36	0	0	65	100	94881	94846	5e-14	67.6
HWI-ST942:56:C4CFMACXX:8:1204:18002:108722	100.00	24	0	0	1	24	49551	49528	2e-07	45.4
HWI-ST942:56:C4CFMACXX:8:1204:18002:108722	100.00	82	0	0	19	100	49463	49544	1e-39	152
HWI-ST942:56:C4CFMACXX:8:1204:20405:267631	100.00	75	0	0	1	75	121908	121834	1e-35	139
HWI-ST942:56:C4CFMACXX:8:1204:20405:267631	100.00	25	0	0	76	100	56223	56199	6e-08	47.3
HWI-ST942:56:C4CFMACXX:8:1204:2274:38302	100.00	80	0	0	1	80	109746	109825	2e-38	148
HWI-ST942:56:C4CFMACXX:8:1204:2274:38302	100.00	21	0	0	80	100	103995	104015	1e-05	39.9
HWI-ST942:56:C4CFMACXX:8:1204:5427:241261	100.00	66	0	0	1	66	98391	98456	1e-30	122
HWI-ST942:56:C4CFMACXX:8:1204:5427:241261	100.00	34	0	0	67	100	94172	94205	6e-13	63.9
HWI-ST942:56:C4CFMACXX:8:1204:7293:238712	100.00	23	0	0	1	23	73059	73037	8e-07	43.6
HWI-ST942:56:C4CFMACXX:8:1204:7293:238712	100.00	58	0	0	17	74	72988	73045	3e-26	108
HWI-ST942:56:C4CFMACXX:8:1205:13008:353111	100.00	68	0	0	1	68	87815	87748	8e-32	126
HWI-ST942:56:C4CFMACXX:8:1205:13008:353111	100.00	36	0	0	65	100	50705	50670	5e-14	67.6
HWI-ST942:56:C4CFMACXX:8:1205:17019:382621	97.50	80	1	1	1	79	51198	51119	1e-34	135
HWI-ST942:56:C4CFMACXX:8:1205:17019:382621	97.87	47	0	1	54	100	82594	82639	6e-18	80.5
HWI-ST942:56:C4CFMACXX:8:1205:17019:382622	98.28	58	0	1	1	58	82650	82594	5e-24	100
HWI-ST942:56:C4CFMACXX:8:1205:17019:382622	97.06	68	1	1	33	99	51119	51186	6e-28	113
HWI-ST942:56:C4CFMACXX:8:1205:19774:235731	100.00	47	0	0	1	47	47	1	4e-20	87.9
HWI-ST942:56:C4CFMACXX:8:1205:19774:235731	100.00	53	0	0	48	100	84171	84223	2e-23	99.0
HWI-ST942:56:C4CFMACXX:8:1205:20031:759232	100.00	58	0	0	1	58	112274	112331	3e-26	108
HWI-ST942:56:C4CFMACXX:8:1205:20031:759232	100.00	48	0	0	53	100	112184	112231	1e-20	89.8
HWI-ST942:56:C4CFMACXX:8:1205:2970:205322	100.00	69	0	0	1	69	65962	65894	2e-32	128
HWI-ST942:56:C4CFMACXX:8:1205:2970:205322	100.00	29	0	0	70	98	29113	29085	4e-10	54.7
HWI-ST942:56:C4CFMACXX:8:1205:5653:62041	100.00	83	0	0	1	83	54612	54530	4e-40	154
HWI-ST942:56:C4CFMACXX:8:1205:5653:62041	93.94	33	2	0	68	100	54530	54562	5e-09	51.0
HWI-ST942:56:C4CFMACXX:8:1205:5653:62042	94.74	38	2	0	1	38	54567	54530	8e-12	60.2
HWI-ST942:56:C4CFMACXX:8:1205:5653:62042	100.00	78	0	0	23	100	54530	54607	2e-37	145
HWI-ST942:56:C4CFMACXX:8:1205:6193:610092	95.65	69	2	1	1	69	13663	13596	8e-27	110
HWI-ST942:56:C4CFMACXX:8:1205:6193:610092	100.00	45	0	0	55	99	13589	13633	5e-19	84.2
HWI-ST942:56:C4CFMACXX:8:1205:8842:862162	100.00	77	0	0	1	77	30766	30842	8e-37	143
HWI-ST942:56:C4CFMACXX:8:1205:8842:862162	100.00	33	0	0	68	100	28844	28812	2e-12	62.1
HWI-ST942:56:C4CFMACXX:8:1205:8847:56101	100.00	82	0	0	1	82	125980	126061	1e-39	152
HWI-ST942:56:C4CFMACXX:8:1205:8847:56101	100.00	22	0	0	79	100	125886	125907	3e-06	41.7
HWI-ST942:56:C4CFMACXX:8:1206:16360:187262	100.00	51	0	0	1	51	87286	87236	2e-22	95.3
HWI-ST942:56:C4CFMACXX:8:1206:16360:187262	100.00	50	0	0	51	100	87387	87338	8e-22	93.5
HWI-ST942:56:C4CFMACXX:8:1206:17012:945941	98.11	53	1	0	1	53	64548	64600	8e-22	93.5
HWI-ST942:56:C4CFMACXX:8:1206:17012:945941	100.00	51	0	0	50	100	124120	124170	2e-22	95.3
HWI-ST942:56:C4CFMACXX:8:1206:17183:262512	100.00	37	0	0	1	37	71484	71448	1e-14	69.4
HWI-ST942:56:C4CFMACXX:8:1206:17183:262512	100.00	72	0	0	29	100	61482	61553	5e-34	134
HWI-ST942:56:C4CFMACXX:8:1206:17907:808222	94.55	55	2	1	1	54	26208	26154	5e-19	84.2
HWI-ST942:56:C4CFMACXX:8:1206:17907:808222	100.00	62	0	0	39	100	26079	26140	2e-28	115
HWI-ST942:56:C4CFMACXX:8:1206:6372:593922	100.00	51	0	0	1	51	98186	98236	2e-22	95.3
HWI-ST942:56:C4CFMACXX:8:1206:6372:593922	100.00	50	0	0	51	100	75994	75945	8e-22	93.5
HWI-ST942:56:C4CFMACXX:8:1207:14353:219612	100.00	46	0	0	1	46	67209	67164	1e-19	86.1
HWI-ST942:56:C4CFMACXX:8:1207:14353:219612	91.18	34	1	2	66	98	49949	49981	2e-07	45.4
HWI-ST942:56:C4CFMACXX:8:1207:17038:617371	100.00	81	0	0	1	81	41198	41118	5e-39	150
HWI-ST942:56:C4CFMACXX:8:1207:17038:617371	100.00	20	0	0	81	100	119712	119731	4e-05	38.1
HWI-ST942:56:C4CFMACXX:8:1207:17777:427971	100.00	53	0	0	1	53	19599	19651	2e-23	99.0
HWI-ST942:56:C4CFMACXX:8:1207:17777:427971	100.00	45	0	0	53	97	64510	64466	5e-19	84.2
HWI-ST942:56:C4CFMACXX:8:1207:2044:484942	97.59	83	0	2	1	81	25498	25416	3e-36	141
HWI-ST942:56:C4CFMACXX:8:1207:2044:484942	97.14	35	1	0	66	100	97679	97713	8e-12	60.2
HWI-ST942:56:C4CFMACXX:8:1207:21047:413821	100.00	76	0	0	1	76	107892	107967	3e-36	141
HWI-ST942:56:C4CFMACXX:8:1207:21047:413821	92.11	38	3	0	62	99	837	800	4e-10	54.7
HWI-ST942:56:C4CFMACXX:8:1207:7523:824801	100.00	66	0	0	1	66	94088	94153	1e-30	122
HWI-ST942:56:C4CFMACXX:8:1207:7523:824801	100.00	32	0	0	65	96	65170	65201	8e-12	60.2
HWI-ST942:56:C4CFMACXX:8:1207:7523:824802	100.00	65	0	0	1	65	65234	65170	4e-30	121
HWI-ST942:56:C4CFMACXX:8:1207:7523:824802	100.00	37	0	0	64	100	94153	94117	1e-14	69.4
HWI-ST942:56:C4CFMACXX:8:1208:11696:338201	100.00	80	0	0	1	80	10167	10246	2e-38	148
HWI-ST942:56:C4CFMACXX:8:1208:11696:338201	100.00	21	0	0	79	99	10228	10208	1e-05	39.9
HWI-ST942:56:C4CFMACXX:8:1208:11696:338202	100.00	28	0	0	1	28	10201	10228	1e-09	52.8
HWI-ST942:56:C4CFMACXX:8:1208:11696:338202	100.00	74	0	0	27	100	10246	10173	4e-35	137
HWI-ST942:56:C4CFMACXX:8:1208:12583:843222	100.00	79	0	0	1	79	19735	19813	6e-38	147
HWI-ST942:56:C4CFMACXX:8:1208:12583:843222	100.00	24	0	0	76	99	96343	96320	2e-07	45.4
HWI-ST942:56:C4CFMACXX:8:1208:13665:652902	100.00	73	0	0	1	73	109898	109970	1e-34	135
HWI-ST942:56:C4CFMACXX:8:1208:13665:652902	100.00	28	0	0	72	99	49000	49027	1e-09	52.8
HWI-ST942:56:C4CFMACXX:8:1208:14817:833902	100.00	28	0	0	1	28	27670	27643	1e-09	52.8
HWI-ST942:56:C4CFMACXX:8:1208:14817:833902	100.00	78	0	0	23	100	27615	27692	2e-37	145
HWI-ST942:56:C4CFMACXX:8:1208:16775:648421	100.00	66	0	0	1	66	64113	64048	1e-30	122
HWI-ST942:56:C4CFMACXX:8:1208:16775:648421	100.00	34	0	0	67	100	125860	125827	6e-13	63.9
HWI-ST942:56:C4CFMACXX:8:1208:16983:876132	100.00	38	0	0	1	38	76805	76842	4e-15	71.3
HWI-ST942:56:C4CFMACXX:8:1208:16983:876132	98.53	68	1	0	33	100	76867	76800	4e-30	121
HWI-ST942:56:C4CFMACXX:8:1208:7359:156832	100.00	47	0	0	1	47	1220	1266	4e-20	87.9
HWI-ST942:56:C4CFMACXX:8:1208:7359:156832	100.00	56	0	0	45	100	1314	1259	4e-25	104
HWI-ST942:56:C4CFMACXX:8:1208:8014:902651	100.00	82	0	0	1	82	25527	25446	1e-39	152
HWI-ST942:56:C4CFMACXX:8:1208:8014:902651	100.00	21	0	0	80	100	18860	18880	1e-05	39.9
HWI-ST942:56:C4CFMACXX:8:1208:8014:902652	100.00	68	0	0	1	68	18927	18860	8e-32	126
HWI-ST942:56:C4CFMACXX:8:1208:8014:902652	100.00	35	0	0	66	100	25446	25480	2e-13	65.8
HWI-ST942:56:C4CFMACXX:8:1209:12638:326862	98.67	75	1	0	1	75	45357	45283	5e-34	134
HWI-ST942:56:C4CFMACXX:8:1209:12638:326862	100.00	30	0	0	71	100	120709	120680	1e-10	56.5
HWI-ST942:56:C4CFMACXX:8:1209:1529:377822	100.00	24	0	0	1	24	74533	74556	2e-07	45.4
HWI-ST942:56:C4CFMACXX:8:1209:1529:377822	100.00	77	0	0	24	100	74541	74617	8e-37	143
HWI-ST942:56:C4CFMACXX:8:1209:15604:839692	100.00	36	0	0	1	36	123503	123538	5e-14	67.6
HWI-ST942:56:C4CFMACXX:8:1209:15604:839692	97.47	79	1	1	23	100	8359	8437	5e-34	134
HWI-ST942:56:C4CFMACXX:8:1209:18269:943161	100.00	86	0	0	1	86	43902	43987	8e-42	159
HWI-ST942:56:C4CFMACXX:8:1209:18269:943161	93.55	31	1	1	69	99	76734	76763	2e-07	45.4
HWI-ST942:56:C4CFMACXX:8:1209:3658:944292	98.39	62	1	0	1	62	20802	20863	8e-27	110
HWI-ST942:56:C4CFMACXX:8:1209:3658:944292	100.00	37	0	0	60	96	76404	76368	1e-14	69.4
HWI-ST942:56:C4CFMACXX:8:1209:6186:259682	100.00	78	0	0	1	78	81956	82033	2e-37	145
HWI-ST942:56:C4CFMACXX:8:1209:6186:259682	100.00	21	0	0	78	98	72613	72593	1e-05	39.9
HWI-ST942:56:C4CFMACXX:8:1209:6556:939911	100.00	70	0	0	1	70	127192	127123	6e-33	130
HWI-ST942:56:C4CFMACXX:8:1209:6556:939911	100.00	33	0	0	68	100	107008	106976	2e-12	62.1
HWI-ST942:56:C4CFMACXX:8:1209:7052:929311	100.00	76	0	0	1	76	64914	64839	3e-36	141
HWI-ST942:56:C4CFMACXX:8:1209:7052:929311	96.97	33	1	0	68	100	126613	126645	1e-10	56.5
HWI-ST942:56:C4CFMACXX:8:1209:7052:929312	98.15	54	1	0	1	54	126666	126613	2e-22	95.3
HWI-ST942:56:C4CFMACXX:8:1209:7052:929312	100.00	54	0	0	46	99	64839	64892	5e-24	100
HWI-ST942:56:C4CFMACXX:8:1209:8111:159991	98.48	66	0	1	1	66	127588	127524	2e-28	115
HWI-ST942:56:C4CFMACXX:8:1209:8111:159991	100.00	38	0	0	63	100	107144	107107	4e-15	71.3
HWI-ST942:56:C4CFMACXX:8:1210:10276:238522	100.00	75	0	0	1	75	41196	41122	1e-35	139
HWI-ST942:56:C4CFMACXX:8:1210:10276:238522	100.00	24	0	0	76	99	127431	127454	2e-07	45.4
HWI-ST942:56:C4CFMACXX:8:1210:12567:72101	100.00	63	0	0	1	63	31253	31191	5e-29	117
HWI-ST942:56:C4CFMACXX:8:1210:12567:72101	94.44	54	3	0	46	99	108547	108600	5e-19	84.2
HWI-ST942:56:C4CFMACXX:8:1210:12567:72102	95.59	68	3	0	1	68	108614	108547	8e-27	110
HWI-ST942:56:C4CFMACXX:8:1210:12567:72102	100.00	49	0	0	51	99	31191	31239	3e-21	91.6
HWI-ST942:56:C4CFMACXX:8:1210:13924:812802	96.55	29	1	0	1	29	23847	23875	2e-08	49.1
HWI-ST942:56:C4CFMACXX:8:1210:13924:812802	100.00	75	0	0	22	96	23930	23856	1e-35	139
HWI-ST942:56:C4CFMACXX:8:1210:19421:1004312	100.00	69	0	0	1	69	49463	49531	2e-32	128
HWI-ST942:56:C4CFMACXX:8:1210:19421:1004312	95.45	44	1	1	56	99	119521	119563	1e-14	69.4
HWI-ST942:56:C4CFMACXX:8:1210:19563:833312	100.00	67	0	0	1	67	123690	123756	3e-31	124
HWI-ST942:56:C4CFMACXX:8:1210:19563:833312	100.00	35	0	0	66	100	31585	31551	2e-13	65.8
HWI-ST942:56:C4CFMACXX:8:1210:20778:340092	98.21	56	1	0	1	56	90662	90607	2e-23	99.0
HWI-ST942:56:C4CFMACXX:8:1210:20778:340092	100.00	50	0	0	50	99	84431	84382	8e-22	93.5
HWI-ST942:56:C4CFMACXX:8:1211:11733:444342	100.00	38	0	0	1	38	17249	17286	4e-15	71.3
HWI-ST942:56:C4CFMACXX:8:1211:11733:444342	100.00	46	0	0	34	79	7869	7914	1e-19	86.1
HWI-ST942:56:C4CFMACXX:8:1211:12682:783791	98.57	70	0	1	1	69	109492	109423	1e-30	122
HWI-ST942:56:C4CFMACXX:8:1211:12682:783791	100.00	36	0	0	64	99	100452	100487	5e-14	67.6
HWI-ST942:56:C4CFMACXX:8:1211:13019:852802	97.33	75	2	0	1	75	67539	67465	2e-32	128
HWI-ST942:56:C4CFMACXX:8:1211:13019:852802	100.00	28	0	0	73	100	50089	50116	1e-09	52.8
HWI-ST942:56:C4CFMACXX:8:1211:13730:730562	100.00	27	0	0	1	27	104359	104333	5e-09	51.0
HWI-ST942:56:C4CFMACXX:8:1211:13730:730562	100.00	71	0	0	26	96	67929	67859	2e-33	132
HWI-ST942:56:C4CFMACXX:8:1211:16608:994721	100.00	69	0	0	1	69	72190	72122	2e-32	128
HWI-ST942:56:C4CFMACXX:8:1211:16608:994721	100.00	33	0	0	68	100	30103	30071	2e-12	62.1
HWI-ST942:56:C4CFMACXX:8:1211:17528:776421	100.00	67	0	0	1	67	50654	50720	3e-31	124
HWI-ST942:56:C4CFMACXX:8:1211:17528:776421	100.00	35	0	0	66	100	99573	99539	2e-13	65.8
HWI-ST942:56:C4CFMACXX:8:1211:18246:176831	100.00	32	0	0	1	32	107630	107599	8e-12	60.2
HWI-ST942:56:C4CFMACXX:8:1211:18246:176831	98.46	65	1	0	32	96	121843	121779	2e-28	115
HWI-ST942:56:C4CFMACXX:8:1211:19403:952302	100.00	29	0	0	1	29	121842	121814	4e-10	54.7
HWI-ST942:56:C4CFMACXX:8:1211:19403:952302	100.00	74	0	0	26	99	121793	121866	4e-35	137
HWI-ST942:56:C4CFMACXX:8:1211:20772:36202	98.72	78	0	1	1	78	78132	78208	4e-35	137
HWI-ST942:56:C4CFMACXX:8:1211:20772:36202	97.67	43	0	1	57	99	78208	78167	1e-15	73.1
HWI-ST942:56:C4CFMACXX:8:1211:5901:356662	96.43	28	1	0	1	28	109835	109862	6e-08	47.3
HWI-ST942:56:C4CFMACXX:8:1211:5901:356662	100.00	77	0	0	23	99	109881	109805	8e-37	143
HWI-ST942:56:C4CFMACXX:8:1211:6903:978222	96.00	50	2	0	1	50	69898	69849	2e-18	82.4
HWI-ST942:56:C4CFMACXX:8:1211:6903:978222	95.95	74	2	1	27	100	69809	69881	1e-29	119
HWI-ST942:56:C4CFMACXX:8:1212:10888:929582	100.00	32	0	0	1	32	96974	97005	8e-12	60.2
HWI-ST942:56:C4CFMACXX:8:1212:10888:929582	100.00	74	0	0	27	100	97049	96976	4e-35	137
HWI-ST942:56:C4CFMACXX:8:1212:15380:571322	100.00	40	0	0	1	40	72172	72211	3e-16	75.0
HWI-ST942:56:C4CFMACXX:8:1212:15380:571322	100.00	67	0	0	32	98	122806	122740	3e-31	124
HWI-ST942:56:C4CFMACXX:8:1212:15783:537792	100.00	80	0	0	1	80	63706	63627	2e-38	148
HWI-ST942:56:C4CFMACXX:8:1212:15783:537792	100.00	21	0	0	80	100	94247	94267	1e-05	39.9
HWI-ST942:56:C4CFMACXX:8:1213:11166:143551	100.00	54	0	0	1	54	76352	76299	5e-24	100
HWI-ST942:56:C4CFMACXX:8:1213:11166:143551	100.00	46	0	0	54	99	76434	76389	1e-19	86.1
HWI-ST942:56:C4CFMACXX:8:1213:14087:304011	100.00	63	0	0	1	63	119809	119747	5e-29	117
HWI-ST942:56:C4CFMACXX:8:1213:14087:304011	97.67	43	0	1	58	99	16664	16622	1e-15	73.1
HWI-ST942:56:C4CFMACXX:8:1213:19296:507812	100.00	57	0	0	1	57	112141	112197	1e-25	106
HWI-ST942:56:C4CFMACXX:8:1213:19296:507812	100.00	52	0	0	49	100	47255	47204	6e-23	97.1
HWI-ST942:56:C4CFMACXX:8:1213:2259:597832	100.00	50	0	0	1	50	127781	127732	8e-22	93.5
HWI-ST942:56:C4CFMACXX:8:1213:2259:597832	100.00	61	0	0	40	100	97222	97162	6e-28	113
HWI-ST942:56:C4CFMACXX:8:1213:4793:779092	100.00	45	0	0	1	45	94970	94926	5e-19	84.2
HWI-ST942:56:C4CFMACXX:8:1213:4793:779092	98.36	61	1	0	40	100	94848	94908	3e-26	108
HWI-ST942:56:C4CFMACXX:8:1213:8474:578681	100.00	36	0	0	1	36	37903	37868	5e-14	67.6
HWI-ST942:56:C4CFMACXX:8:1213:8474:578681	100.00	68	0	0	33	100	89988	90055	8e-32	126
HWI-ST942:56:C4CFMACXX:8:1214:11377:231032	100.00	66	0	0	1	66	94779	94844	1e-30	122
HWI-ST942:56:C4CFMACXX:8:1214:11377:231032	87.23	94	2	9	11	99	94844	94756	2e-23	99.0
HWI-ST942:56:C4CFMACXX:8:1214:12719:952992	98.48	66	1	0	1	66	112544	112479	5e-29	117
HWI-ST942:56:C4CFMACXX:8:1214:12719:952992	100.00	36	0	0	65	100	92796	92831	5e-14	67.6
HWI-ST942:56:C4CFMACXX:8:1214:13355:762442	98.48	66	1	0	1	66	60374	60309	5e-29	117
HWI-ST942:56:C4CFMACXX:8:1214:13355:762442	97.62	42	1	0	59	100	60284	60325	1e-15	73.1
HWI-ST942:56:C4CFMACXX:8:1214:13567:48192	97.14	35	1	0	1	35	88013	87979	8e-12	60.2
HWI-ST942:56:C4CFMACXX:8:1214:13567:48192	100.00	73	0	0	28	100	87923	87995	1e-34	135
HWI-ST942:56:C4CFMACXX:8:1214:13639:895341	100.00	55	0	0	1	55	3922	3868	1e-24	102
HWI-ST942:56:C4CFMACXX:8:1214:13639:895341	100.00	39	0	0	48	86	553	591	9e-16	73.1
HWI-ST942:56:C4CFMACXX:8:1214:13639:895342	100.00	38	0	0	1	38	590	553	3e-15	71.3
HWI-ST942:56:C4CFMACXX:8:1214:13639:895342	100.00	55	0	0	31	85	3868	3922	1e-24	102
HWI-ST942:56:C4CFMACXX:8:1214:16685:515751	100.00	60	0	0	1	60	92711	92652	2e-27	111
HWI-ST942:56:C4CFMACXX:8:1214:16685:515751	100.00	40	0	0	61	100	92764	92725	3e-16	75.0
HWI-ST942:56:C4CFMACXX:8:1214:17636:29202	100.00	58	0	0	1	58	94962	94905	3e-26	108
HWI-ST942:56:C4CFMACXX:8:1214:17636:29202	97.92	48	1	0	52	99	94926	94973	5e-19	84.2
HWI-ST942:56:C4CFMACXX:8:1214:19628:634121	100.00	57	0	0	1	57	77949	78005	1e-25	106
HWI-ST942:56:C4CFMACXX:8:1214:19628:634121	97.92	48	1	0	53	100	77916	77963	5e-19	84.2
HWI-ST942:56:C4CFMACXX:8:1214:19628:634122	98.57	70	1	0	1	70	77985	77916	3e-31	124
HWI-ST942:56:C4CFMACXX:8:1214:19628:634122	100.00	32	0	0	66	97	78005	77974	8e-12	60.2
HWI-ST942:56:C4CFMACXX:8:1214:2839:698272	100.00	37	0	0	1	37	111985	111949	1e-14	69.4
HWI-ST942:56:C4CFMACXX:8:1214:2839:698272	96.97	66	2	0	35	100	111923	111988	2e-27	111
HWI-ST942:56:C4CFMACXX:8:1214:9933:932732	100.00	64	0	0	1	64	114207	114270	1e-29	119
HWI-ST942:56:C4CFMACXX:8:1214:9933:932732	100.00	33	0	0	64	96	103656	103624	2e-12	62.1
HWI-ST942:56:C4CFMACXX:8:1215:5065:499322	98.25	57	1	0	1	57	63882	63938	5e-24	100
HWI-ST942:56:C4CFMACXX:8:1215:5065:499322	100.00	54	0	0	47	100	81726	81673	5e-24	100
HWI-ST942:56:C4CFMACXX:8:1215:6021:789711	100.00	57	0	0	1	57	100353	100297	1e-25	106
HWI-ST942:56:C4CFMACXX:8:1215:6021:789711	100.00	43	0	0	58	100	100297	100339	6e-18	80.5
HWI-ST942:56:C4CFMACXX:8:1215:6879:912892	100.00	80	0	0	1	80	1587	1666	2e-38	148
HWI-ST942:56:C4CFMACXX:8:1215:6879:912892	100.00	23	0	0	77	99	5280	5302	8e-07	43.6
HWI-ST942:56:C4CFMACXX:8:1215:8352:533792	100.00	40	0	0	1	40	17591	17630	3e-16	75.0
HWI-ST942:56:C4CFMACXX:8:1215:8352:533792	100.00	67	0	0	33	99	17663	17597	3e-31	124
HWI-ST942:56:C4CFMACXX:8:1216:13808:161562	100.00	72	0	0	1	72	11542	11471	5e-34	134
HWI-ST942:56:C4CFMACXX:8:1216:13808:161562	100.00	28	0	0	72	99	89755	89782	1e-09	52.8
HWI-ST942:56:C4CFMACXX:8:1216:20840:628942	100.00	73	0	0	1	73	100725	100797	1e-34	135
HWI-ST942:56:C4CFMACXX:8:1216:20840:628942	100.00	29	0	0	72	100	104421	104393	4e-10	54.7
HWI-ST942:56:C4CFMACXX:8:1216:3873:186072	100.00	41	0	0	1	41	11151	11111	8e-17	76.8
HWI-ST942:56:C4CFMACXX:8:1216:3873:186072	100.00	68	0	0	33	100	89277	89210	8e-32	126
HWI-ST942:56:C4CFMACXX:8:1216:7063:267071	97.50	40	0	1	1	40	77611	77573	5e-14	67.6
HWI-ST942:56:C4CFMACXX:8:1216:7063:267071	100.00	69	0	0	29	97	93596	93528	2e-32	128
HWI-ST942:56:C4CFMACXX:8:1216:8004:532962	98.15	54	1	0	1	54	126906	126853	2e-22	95.3
HWI-ST942:56:C4CFMACXX:8:1216:8004:532962	100.00	53	0	0	47	99	126836	126888	2e-23	99.0
HWI-ST942:56:C4CFMACXX:8:1216:9492:688941	100.00	49	0	0	1	49	92551	92599	3e-21	91.6
HWI-ST942:56:C4CFMACXX:8:1216:9492:688941	97.50	40	1	0	49	88	92531	92570	1e-14	69.4
HWI-ST942:56:C4CFMACXX:8:1216:9492:688942	100.00	40	0	0	1	40	92570	92531	3e-16	75.0
HWI-ST942:56:C4CFMACXX:8:1216:9492:688942	100.00	49	0	0	40	88	92599	92551	2e-21	91.6
HWI-ST942:56:C4CFMACXX:8:1301:13061:280341	100.00	53	0	0	1	53	109365	109417	2e-23	99.0
[truncated: 839 more rows]

## Sheet: TS-1
Read Identifiant	Match %	Aligned bases	Mismatches	Gap Openings	Start Pos. Read	Stop Pos. Read	Start Pos. Genome	Stop Pos. Genome	Expect Value	Bit Score
SRR492388.99126891	100.00	77	0	0	1	77	115340	115416	8e-37	143
SRR492388.99126891	100.00	24	0	0	78	101	47811	47834	2e-07	45.4
SRR492388.98855261	100.00	90	0	0	1	90	93654	93743	5e-44	167
SRR492388.98855261	86.49	37	4	1	65	101	42002	41967	1e-05	39.9
SRR492388.9871772	98.86	88	0	1	1	87	127468	127381	1e-40	156
SRR492388.9871772	85.00	40	6	0	62	101	40329	40290	3e-06	41.7
SRR492388.9871771	93.33	90	6	0	1	90	40240	40329	5e-34	134
SRR492388.9871771	97.37	38	0	1	65	101	127381	127418	6e-13	63.9
SRR492388.98335721	100.00	68	0	0	1	68	116527	116594	8e-32	126
SRR492388.98335721	100.00	32	0	0	70	101	65449	65480	8e-12	60.2
SRR492388.98333711	100.00	33	0	0	1	33	45001	44969	2e-12	62.1
SRR492388.98333711	98.59	71	1	0	31	101	44937	45007	8e-32	126
SRR492388.97671452	96.00	25	1	0	3	27	688	664	3e-06	41.7
SRR492388.97671452	97.62	42	1	0	28	69	654	613	1e-15	73.1
SRR492388.97431152	96.67	60	1	1	1	60	61967	61909	2e-23	99.0
SRR492388.97431152	98.28	58	1	0	44	101	62106	62049	1e-24	102
SRR492388.97049142	98.61	72	1	0	1	72	101327	101256	2e-32	128
SRR492388.97049142	89.66	29	3	0	73	101	103831	103803	4e-05	38.1
SRR492388.96959072	100.00	74	0	0	1	74	73276	73203	4e-35	137
SRR492388.96959072	100.00	27	0	0	75	101	73190	73164	5e-09	51.0
SRR492388.95880901	100.00	50	0	0	1	50	93551	93502	8e-22	93.5
SRR492388.95880901	98.36	61	0	1	42	101	93240	93300	1e-25	106
SRR492388.95350971	100.00	28	0	0	1	28	102978	103005	1e-09	52.8
SRR492388.95350971	94.74	76	4	0	26	101	103025	102950	1e-29	119
SRR492388.94831591	100.00	61	0	0	1	61	35986	36046	6e-28	113
SRR492388.94831591	100.00	44	0	0	58	101	85198	85155	2e-18	82.4
SRR492388.94625311	100.00	42	0	0	1	42	127508	127467	2e-17	78.7
SRR492388.94625311	100.00	67	0	0	35	101	127443	127377	3e-31	124
SRR492388.94317621	100.00	70	0	0	1	70	117128	117059	6e-33	130
SRR492388.94317621	100.00	31	0	0	71	101	109455	109485	3e-11	58.4
SRR492388.93955042	100.00	72	0	0	1	72	105656	105727	5e-34	134
SRR492388.93955042	100.00	26	0	0	67	92	105758	105733	2e-08	49.1
SRR492388.93955041	100.00	26	0	0	1	26	105733	105758	2e-08	49.1
SRR492388.93955041	100.00	72	0	0	21	92	105727	105656	5e-34	134
SRR492388.93735192	95.59	68	3	0	1	68	77847	77914	8e-27	110
SRR492388.93735192	100.00	28	0	0	73	100	77908	77935	1e-09	52.8
SRR492388.93681401	100.00	27	0	0	1	27	30818	30844	5e-09	51.0
SRR492388.93681401	93.02	86	5	1	14	98	30838	30923	3e-31	124
SRR492388.91714021	100.00	70	0	0	1	70	125832	125763	6e-33	130
SRR492388.91714021	100.00	30	0	0	72	101	85571	85542	1e-10	56.5
SRR492388.91680362	100.00	45	0	0	1	45	53091	53135	5e-19	84.2
SRR492388.91680362	96.61	59	2	0	43	101	32766	32824	2e-23	99.0
SRR492388.9139381	100.00	75	0	0	1	75	26130	26204	1e-35	139
SRR492388.9139381	90.63	32	2	1	71	101	92626	92657	3e-06	41.7
SRR492388.91316161	93.67	79	4	1	1	78	77957	77879	5e-29	117
SRR492388.91316161	100.00	47	0	0	55	101	77914	77868	4e-20	87.9
SRR492388.90207711	92.86	56	2	2	1	55	109740	109794	6e-18	80.5
SRR492388.90207711	100.00	65	0	0	37	101	109794	109730	4e-30	121
SRR492388.88600981	100.00	71	0	0	1	71	116126	116196	2e-33	132
SRR492388.88600981	100.00	29	0	0	73	101	69558	69530	4e-10	54.7
SRR492388.8833142	100.00	30	0	0	1	30	65669	65640	1e-10	56.5
SRR492388.8833142	100.00	73	0	0	29	101	67750	67678	1e-34	135
SRR492388.87764421	100.00	50	0	0	1	50	65595	65546	8e-22	93.5
SRR492388.87764421	100.00	48	0	0	54	101	77281	77328	1e-20	89.8
SRR492388.87245061	100.00	52	0	0	1	52	85510	85561	6e-23	97.1
SRR492388.87245061	100.00	53	0	0	49	101	34945	34893	2e-23	99.0
SRR492388.87188311	100.00	38	0	0	1	38	62607	62570	4e-15	71.3
SRR492388.87188311	100.00	64	0	0	38	101	9713	9650	1e-29	119
SRR492388.86397632	100.00	46	0	0	1	46	87300	87345	1e-19	86.1
SRR492388.86397632	100.00	59	0	0	43	101	87326	87384	8e-27	110
SRR492388.85490582	100.00	77	0	0	1	77	76140	76064	8e-37	143
SRR492388.85490582	100.00	30	0	0	72	101	75934	75963	1e-10	56.5
SRR492388.84199852	100.00	75	0	0	1	75	109762	109688	1e-35	139
SRR492388.84199852	100.00	25	0	0	77	101	109702	109678	6e-08	47.3
SRR492388.83557971	100.00	44	0	0	1	44	77871	77914	2e-18	82.4
SRR492388.83557971	93.90	82	4	1	21	101	77879	77960	1e-30	122
SRR492388.8342242	100.00	39	0	0	1	39	14528	14490	1e-15	73.1
SRR492388.8342242	100.00	62	0	0	40	101	27720	27659	2e-28	115
SRR492388.82850562	100.00	30	0	0	1	30	77885	77914	1e-10	56.5
SRR492388.82850562	94.79	96	4	1	7	101	77879	77974	2e-38	148
SRR492388.82562281	90.70	43	4	0	1	43	5670	5628	3e-11	58.4
SRR492388.82562281	98.81	84	1	0	18	101	5628	5711	5e-39	150
SRR492388.81864812	100.00	80	0	0	1	80	112526	112605	2e-38	148
SRR492388.81864812	100.00	28	0	0	74	101	39590	39563	1e-09	52.8
SRR492388.81226562	100.00	35	0	0	1	35	110331	110297	2e-13	65.8
SRR492388.81226562	100.00	66	0	0	36	101	96295	96360	1e-30	122
SRR492388.80957842	93.90	82	4	1	1	81	77960	77879	1e-30	122
SRR492388.80957842	100.00	44	0	0	58	101	77914	77871	2e-18	82.4
SRR492388.80411072	100.00	78	0	0	1	78	14896	14819	2e-37	145
SRR492388.80411072	96.88	32	1	0	68	99	23947	23916	4e-10	54.7
SRR492388.80411071	95.74	47	2	0	1	47	23901	23947	8e-17	76.8
SRR492388.80411071	100.00	65	0	0	37	101	14819	14883	4e-30	121
SRR492388.80272212	100.00	79	0	0	1	79	95443	95521	6e-38	147
SRR492388.80272212	100.00	24	0	0	78	101	95507	95530	2e-07	45.4
SRR492388.80011391	100.00	81	0	0	1	81	118187	118107	5e-39	150
SRR492388.80011391	100.00	20	0	0	82	101	99586	99567	4e-05	38.1
SRR492388.79579392	98.33	60	1	0	1	60	105499	105440	1e-25	106
SRR492388.79579392	97.83	46	0	1	56	101	11779	11823	2e-17	78.7
SRR492388.77745431	100.00	33	0	0	1	33	94524	94492	2e-12	62.1
SRR492388.77745431	97.62	84	1	1	18	101	94554	94636	8e-37	143
SRR492388.77095642	100.00	78	0	0	1	78	93231	93308	2e-37	145
SRR492388.77095642	100.00	22	0	0	80	101	51781	51802	3e-06	41.7
SRR492388.76419361	95.45	88	4	0	1	88	24444	24357	3e-36	141
SRR492388.76419361	96.00	25	0	1	77	101	5447	5424	1e-05	39.9
SRR492388.75647302	100.00	51	0	0	1	51	48782	48732	2e-22	95.3
SRR492388.75647302	100.00	54	0	0	48	101	126334	126387	5e-24	100
SRR492388.75401532	93.90	82	4	1	1	81	77960	77879	1e-30	122
SRR492388.75401532	100.00	44	0	0	58	101	77914	77871	2e-18	82.4
SRR492388.75076792	100.00	55	0	0	1	55	122689	122635	1e-24	102
SRR492388.75076792	100.00	45	0	0	57	101	85483	85527	5e-19	84.2
SRR492388.74255572	97.62	84	1	1	1	83	82266	82183	8e-37	143
SRR492388.74255572	91.18	34	2	1	69	101	81777	81744	2e-07	45.4
SRR492388.74255571	96.43	84	2	1	1	83	81694	81777	4e-35	137
SRR492388.74255571	94.12	34	1	1	69	101	82183	82216	5e-09	51.0
SRR492388.74075752	100.00	60	0	0	1	60	54003	53944	2e-27	111
SRR492388.74075752	100.00	40	0	0	62	101	100632	100671	3e-16	75.0
SRR492388.73441382	94.79	96	4	1	1	95	77974	77879	2e-38	148
SRR492388.73441382	100.00	30	0	0	72	101	77914	77885	1e-10	56.5
SRR492388.73409802	100.00	26	0	0	1	26	31042	31017	2e-08	49.1
SRR492388.73409802	100.00	82	0	0	20	101	31029	30948	1e-39	152
SRR492388.73291411	100.00	72	0	0	1	72	61669	61598	5e-34	134
SRR492388.73291411	92.68	41	2	1	61	101	61092	61053	3e-11	58.4
SRR492388.73110612	98.73	79	1	0	1	79	93331	93253	3e-36	141
SRR492388.73110612	100.00	21	0	0	81	101	76767	76787	1e-05	39.9
SRR492388.70278272	100.00	76	0	0	1	76	105451	105376	3e-36	141
SRR492388.70278272	92.59	27	1	1	75	101	78274	78299	4e-05	38.1
SRR492388.70231912	100.00	80	0	0	1	80	30931	30852	2e-38	148
SRR492388.70231912	100.00	21	0	0	81	101	52775	52795	1e-05	39.9
SRR492388.69454751	97.44	39	1	0	1	39	94339	94377	5e-14	67.6
SRR492388.69454751	100.00	70	0	0	32	101	94390	94321	6e-33	130
SRR492388.68746781	97.75	89	1	1	1	89	43961	43874	1e-39	152
SRR492388.68746781	100.00	28	0	0	74	101	43690	43717	1e-09	52.8
SRR492388.68638642	100.00	79	0	0	1	79	119363	119441	6e-38	147
SRR492388.68638642	100.00	20	0	0	82	101	104936	104917	4e-05	38.1
SRR492388.68465211	94.44	36	2	0	1	36	85554	85589	1e-10	56.5
SRR492388.68465211	100.00	79	0	0	23	101	85589	85511	6e-38	147
SRR492388.68461411	100.00	22	0	0	1	22	3299	3278	3e-06	41.7
SRR492388.68461411	100.00	84	0	0	18	101	3261	3344	1e-40	156
SRR492388.67880902	100.00	67	0	0	1	67	11325	11391	3e-31	124
SRR492388.67880902	100.00	32	0	0	70	101	11366	11397	8e-12	60.2
SRR492388.6775321	89.04	73	4	4	1	71	25545	25615	4e-20	87.9
SRR492388.6775321	98.44	64	1	0	38	101	25615	25552	6e-28	113
SRR492388.67748491	93.75	32	2	0	1	32	100799	100768	2e-08	49.1
SRR492388.67748491	100.00	73	0	0	28	100	100756	100828	1e-34	135
SRR492388.67548542	100.00	47	0	0	1	47	93524	93478	4e-20	87.9
SRR492388.67548542	100.00	54	0	0	48	101	105372	105319	5e-24	100
SRR492388.6660011	100.00	47	0	0	1	47	77868	77914	4e-20	87.9
SRR492388.6660011	93.67	79	4	1	24	101	77879	77957	5e-29	117
SRR492388.66442552	100.00	67	0	0	1	67	105418	105352	3e-31	124
SRR492388.66442552	100.00	32	0	0	70	101	72990	72959	8e-12	60.2
SRR492388.66383912	100.00	58	0	0	1	58	12759	12816	3e-26	108
SRR492388.66383912	100.00	50	0	0	52	101	63704	63655	8e-22	93.5
SRR492388.65986932	98.89	90	0	1	1	90	30756	30844	8e-42	159
SRR492388.65986932	100.00	20	0	0	82	101	30844	30863	4e-05	38.1
SRR492388.65077191	100.00	25	0	0	2	26	19789	19813	6e-08	47.3
SRR492388.65077191	100.00	79	0	0	23	101	19849	19771	6e-38	147
SRR492388.64994451	100.00	42	0	0	1	42	127223	127264	2e-17	78.7
SRR492388.64994451	100.00	59	0	0	43	101	127009	126951	8e-27	110
SRR492388.63080601	100.00	31	0	0	1	31	92693	92663	3e-11	58.4
SRR492388.63080601	100.00	76	0	0	26	101	92578	92653	3e-36	141
SRR492388.6277432	100.00	60	0	0	1	60	26339	26280	2e-27	111
SRR492388.6277432	100.00	40	0	0	62	101	66065	66104	3e-16	75.0
SRR492388.61750281	100.00	27	0	0	1	27	73272	73298	5e-09	51.0
SRR492388.61750281	100.00	75	0	0	27	101	73335	73409	1e-35	139
SRR492388.61699481	100.00	59	0	0	1	59	96571	96513	8e-27	110
SRR492388.61699481	100.00	43	0	0	59	101	107058	107100	6e-18	80.5
SRR492388.59717771	100.00	20	0	0	1	20	30863	30844	4e-05	38.1
SRR492388.59717771	98.89	90	0	1	12	101	30844	30756	8e-42	159
SRR492388.59557712	100.00	81	0	0	1	81	114934	114854	5e-39	150
SRR492388.59557712	100.00	20	0	0	82	101	22808	22789	4e-05	38.1
SRR492388.58974902	100.00	44	0	0	1	44	77871	77914	2e-18	82.4
SRR492388.58974902	93.90	82	4	1	21	101	77879	77960	1e-30	122
SRR492388.57641642	100.00	80	0	0	1	80	38591	38512	2e-38	148
SRR492388.57641642	100.00	20	0	0	82	101	87334	87353	4e-05	38.1
SRR492388.57277261	93.59	78	4	1	1	77	77956	77879	2e-28	115
SRR492388.57277261	100.00	48	0	0	54	101	77914	77867	1e-20	89.8
SRR492388.56787142	100.00	79	0	0	1	79	105749	105827	6e-38	147
SRR492388.56787142	100.00	21	0	0	81	101	40542	40522	1e-05	39.9
SRR492388.56619752	100.00	69	0	0	1	69	111864	111932	2e-32	128
SRR492388.56619752	100.00	32	0	0	70	101	107662	107693	8e-12	60.2
SRR492388.56048731	93.83	81	4	1	1	80	77959	77879	4e-30	121
SRR492388.56048731	97.78	45	1	0	57	101	77914	77870	2e-17	78.7
SRR492388.5564462	100.00	50	0	0	1	50	118214	118165	8e-22	93.5
SRR492388.5564462	100.00	29	0	0	42	70	47352	47380	4e-10	54.7
SRR492388.5564461	100.00	28	0	0	1	28	47379	47352	1e-09	52.8
SRR492388.5564461	100.00	50	0	0	20	69	118165	118214	8e-22	93.5
SRR492388.55229041	92.31	39	3	0	5	43	62898	62860	1e-10	56.5
SRR492388.55229041	100.00	77	0	0	25	101	62860	62936	8e-37	143
SRR492388.55172601	100.00	62	0	0	1	62	100346	100285	2e-28	115
SRR492388.55172601	97.37	38	1	0	64	101	111568	111605	2e-13	65.8
SRR492388.54991511	100.00	61	0	0	1	61	49640	49580	6e-28	113
SRR492388.54991511	100.00	47	0	0	55	101	49415	49461	4e-20	87.9
SRR492388.54649811	100.00	39	0	0	1	39	123901	123939	1e-15	73.1
SRR492388.54649811	98.46	65	1	0	37	101	57697	57633	2e-28	115
SRR492388.54292301	98.31	59	1	0	1	59	96656	96598	4e-25	104
SRR492388.54292301	98.08	52	0	1	51	101	96672	96723	1e-20	89.8
SRR492388.54269102	100.00	62	0	0	1	62	40200	40139	2e-28	115
SRR492388.54269102	100.00	38	0	0	64	101	88963	88926	4e-15	71.3
SRR492388.53870931	100.00	72	0	0	1	72	101869	101798	5e-34	134
SRR492388.53870931	100.00	27	0	0	75	101	56486	56512	5e-09	51.0
SRR492388.53222102	100.00	55	0	0	1	55	106088	106034	1e-24	102
SRR492388.53222102	100.00	47	0	0	55	101	70908	70862	4e-20	87.9
SRR492388.52709811	98.55	69	1	0	1	69	16658	16590	1e-30	122
SRR492388.52709811	96.88	32	1	0	70	101	16633	16602	4e-10	54.7
SRR492388.52326332	93.90	82	4	1	1	81	77960	77879	1e-30	122
SRR492388.52326332	100.00	44	0	0	58	101	77914	77871	2e-18	82.4
SRR492388.5171481	94.87	39	2	0	1	39	14018	14056	2e-12	62.1
SRR492388.5171481	95.65	69	3	0	33	101	14099	14031	2e-27	111
SRR492388.51439011	100.00	24	0	0	1	24	51790	51813	2e-07	45.4
SRR492388.51439011	100.00	85	0	0	17	101	92696	92612	3e-41	158
SRR492388.50034221	100.00	30	0	0	1	30	77885	77914	1e-10	56.5
SRR492388.50034221	94.79	96	4	1	7	101	77879	77974	2e-38	148
SRR492388.49787792	100.00	65	0	0	1	65	109543	109607	4e-30	121
SRR492388.49787792	100.00	35	0	0	67	101	93235	93201	2e-13	65.8
SRR492388.49781721	100.00	79	0	0	1	79	22337	22259	6e-38	147
SRR492388.49781721	100.00	20	0	0	82	101	95434	95453	4e-05	38.1
SRR492388.49673301	100.00	46	0	0	1	46	77869	77914	1e-19	86.1
SRR492388.49673301	93.75	80	4	1	23	101	77879	77958	1e-29	119
SRR492388.49576771	100.00	64	0	0	1	64	97542	97605	1e-29	119
SRR492388.49576771	100.00	36	0	0	66	101	96161	96126	5e-14	67.6
SRR492388.49379522	100.00	70	0	0	1	70	49411	49342	6e-33	130
SRR492388.49379522	100.00	36	0	0	66	101	49243	49278	5e-14	67.6
SRR492388.48663021	97.22	72	1	1	1	71	67228	67157	4e-30	121
SRR492388.48663021	100.00	21	0	0	75	95	59387	59407	1e-05	39.9
SRR492388.4727802	100.00	20	0	0	1	20	30863	30844	4e-05	38.1
SRR492388.4727802	98.89	90	0	1	12	101	30844	30756	8e-42	159
SRR492388.47113341	100.00	78	0	0	1	78	19165	19242	2e-37	145
SRR492388.47113341	96.15	26	1	0	76	101	20606	20581	8e-07	43.6
SRR492388.46642511	93.33	75	4	1	1	74	77953	77879	8e-27	110
SRR492388.46642511	98.04	51	1	0	51	101	77914	77864	1e-20	89.8
SRR492388.46183761	100.00	59	0	0	1	59	35901	35843	8e-27	110
SRR492388.46183761	100.00	41	0	0	61	101	87769	87729	8e-17	76.8
SRR492388.45688052	97.78	90	0	2	1	88	30927	30838	4e-40	154
SRR492388.45688052	100.00	24	0	0	75	98	30844	30821	2e-07	45.4
SRR492388.45643341	100.00	32	0	0	1	32	40540	40571	8e-12	60.2
SRR492388.45643341	97.53	81	2	0	21	101	40571	40491	1e-35	139
SRR492388.43860191	100.00	63	0	0	1	63	125043	125105	5e-29	117
SRR492388.43860191	100.00	38	0	0	64	101	356	393	4e-15	71.3
SRR492388.43671062	93.75	80	4	1	1	79	77958	77879	1e-29	119
SRR492388.43671062	100.00	46	0	0	56	101	77914	77869	1e-19	86.1
SRR492388.43053612	100.00	43	0	0	1	43	33747	33705	6e-18	80.5
SRR492388.43053612	97.62	42	1	0	39	80	33645	33686	1e-15	73.1
SRR492388.43053611	97.56	41	1	0	1	41	33685	33645	4e-15	71.3
SRR492388.43053611	100.00	43	0	0	37	79	33705	33747	6e-18	80.5
SRR492388.43050562	100.00	70	0	0	1	70	30960	31029	6e-33	130
SRR492388.43050562	91.89	37	3	0	65	101	31017	31053	1e-09	52.8
SRR492388.43032491	100.00	39	0	0	1	39	111141	111179	1e-15	73.1
SRR492388.43032491	100.00	64	0	0	38	101	111167	111230	1e-29	119
SRR492388.42585711	96.00	25	1	0	1	25	688	664	3e-06	41.7
SRR492388.42585711	100.00	42	0	0	26	67	654	613	2e-17	78.7
SRR492388.4122702	100.00	72	0	0	1	72	82525	82454	5e-34	134
SRR492388.4122702	100.00	40	0	0	62	101	30288	30327	3e-16	75.0
SRR492388.40365632	100.00	30	0	0	1	30	46326	46355	1e-10	56.5
SRR492388.40365632	98.78	82	1	0	20	101	46517	46436	6e-38	147
SRR492388.40325971	96.15	52	2	0	1	52	91377	91326	1e-19	86.1
SRR492388.40325971	100.00	62	0	0	40	101	108311	108250	2e-28	115
SRR492388.40166961	100.00	77	0	0	1	77	44757	44833	8e-37	143
SRR492388.40166961	100.00	30	0	0	72	101	108207	108236	1e-10	56.5
SRR492388.39861821	100.00	79	0	0	1	79	97501	97579	6e-38	147
SRR492388.39861821	100.00	20	0	0	82	101	99862	99843	4e-05	38.1
SRR492388.39145782	100.00	30	0	0	1	30	77885	77914	1e-10	56.5
SRR492388.39145782	94.79	96	4	1	7	101	77879	77974	2e-38	148
SRR492388.39076622	100.00	59	0	0	1	59	106130	106188	8e-27	110
SRR492388.39076622	100.00	46	0	0	56	101	47312	47267	1e-19	86.1
SRR492388.39069771	98.89	90	0	1	1	90	30756	30844	8e-42	159
SRR492388.39069771	100.00	20	0	0	82	101	30844	30863	4e-05	38.1
SRR492388.38974921	92.05	88	5	2	1	88	24939	24854	1e-30	122
SRR492388.38974921	95.83	24	0	1	78	101	127076	127054	4e-05	38.1
SRR492388.38906391	96.43	28	1	0	1	28	123898	123925	6e-08	47.3
SRR492388.38906391	100.00	78	0	0	24	101	123936	123859	2e-37	145
SRR492388.37748832	100.00	47	0	0	1	47	77868	77914	4e-20	87.9
SRR492388.37748832	93.67	79	4	1	24	101	77879	77957	5e-29	117
SRR492388.37543462	100.00	44	0	0	1	44	96282	96325	2e-18	82.4
SRR492388.37543462	100.00	56	0	0	46	101	16834	16889	4e-25	104
SRR492388.37213791	100.00	76	0	0	1	76	24741	24816	3e-36	141
SRR492388.37213791	100.00	25	0	0	77	101	11179	11155	6e-08	47.3
SRR492388.37067362	100.00	76	0	0	1	76	54017	54092	3e-36	141
SRR492388.37067362	100.00	23	0	0	79	101	75938	75916	8e-07	43.6
SRR492388.36746602	100.00	82	0	0	1	82	30948	31029	1e-39	152
SRR492388.36746602	100.00	24	0	0	76	99	31017	31040	2e-07	45.4
SRR492388.35840091	100.00	29	0	0	1	29	14763	14791	4e-10	54.7
SRR492388.35840091	100.00	78	0	0	24	101	14807	14730	2e-37	145
SRR492388.35755231	100.00	47	0	0	1	47	9047	9093	4e-20	87.9
SRR492388.35755231	100.00	56	0	0	46	101	15355	15410	4e-25	104
SRR492388.3493002	100.00	67	0	0	1	67	3853	3919	3e-31	124
SRR492388.3493002	97.56	41	0	1	62	101	4069	4029	1e-14	69.4
SRR492388.33862242	100.00	66	0	0	1	66	47288	47223	1e-30	122
SRR492388.33862242	97.37	38	0	1	65	101	47259	47222	6e-13	63.9
SRR492388.33862241	98.33	60	0	1	1	59	47200	47259	4e-25	104
SRR492388.33862241	100.00	44	0	0	58	101	47223	47266	2e-18	82.4
SRR492388.32842991	100.00	61	0	0	1	61	49640	49580	6e-28	113
SRR492388.32842991	100.00	44	0	0	55	98	49415	49458	2e-18	82.4
SRR492388.32036321	97.22	36	1	0	1	36	89859	89894	2e-12	62.1
SRR492388.32036321	98.53	68	1	0	34	101	89906	89839	4e-30	121
SRR492388.31969661	100.00	67	0	0	1	67	13703	13637	3e-31	124
SRR492388.31969661	100.00	34	0	0	68	101	92382	92349	6e-13	63.9
SRR492388.31952771	100.00	52	0	0	1	52	93694	93745	6e-23	97.1
SRR492388.31952771	100.00	49	0	0	53	101	103903	103951	3e-21	91.6
SRR492388.31762612	100.00	42	0	0	28	69	654	613	2e-17	78.7
SRR492388.31762612	96.00	25	1	0	3	27	688	664	3e-06	41.7
SRR492388.299762092	98.46	65	1	0	1	65	85285	85349	2e-28	115
SRR492388.299762092	100.00	35	0	0	66	100	95950	95916	2e-13	65.8
SRR492388.299733671	100.00	42	0	0	1	42	95761	95802	2e-17	78.7
SRR492388.299733671	97.26	73	1	1	29	101	95820	95749	1e-30	122
SRR492388.299701452	98.28	58	0	1	1	58	94271	94327	5e-24	100
SRR492388.299701452	98.04	51	1	0	51	101	86488	86438	1e-20	89.8
SRR492388.299025691	100.00	30	0	0	1	30	77885	77914	1e-10	56.5
SRR492388.299025691	94.79	96	4	1	7	101	77879	77974	2e-38	148
SRR492388.298862801	100.00	48	0	0	1	48	77867	77914	1e-20	89.8
SRR492388.298862801	93.59	78	4	1	25	101	77879	77956	2e-28	115
SRR492388.298158901	100.00	49	0	0	1	49	30476	30524	3e-21	91.6
SRR492388.298158901	100.00	57	0	0	45	101	100196	100140	1e-25	106
SRR492388.298132872	96.88	64	2	0	1	64	96255	96192	3e-26	108
SRR492388.298132872	100.00	48	0	0	54	101	85375	85328	1e-20	89.8
SRR492388.297735151	100.00	48	0	0	1	48	77867	77914	1e-20	89.8
SRR492388.297735151	93.59	78	4	1	25	101	77879	77956	2e-28	115
SRR492388.297134232	100.00	72	0	0	1	72	105416	105487	5e-34	134
SRR492388.297134232	100.00	27	0	0	75	101	43230	43256	5e-09	51.0
SRR492388.295283762	100.00	52	0	0	1	52	32288	32339	6e-23	97.1
SRR492388.295283762	97.83	46	1	0	53	98	95683	95638	6e-18	80.5
SRR492388.2951721	100.00	63	0	0	1	63	98484	98546	5e-29	117
SRR492388.2951721	100.00	34	0	0	68	101	98505	98538	6e-13	63.9
SRR492388.294995702	100.00	29	0	0	1	29	103749	103721	4e-10	54.7
SRR492388.294995702	100.00	73	0	0	29	101	6733	6661	1e-34	135
SRR492388.294716662	93.75	80	4	1	1	79	77958	77879	1e-29	119
SRR492388.294716662	100.00	46	0	0	56	101	77914	77869	1e-19	86.1
SRR492388.294716661	100.00	47	0	0	1	47	77868	77914	4e-20	87.9
SRR492388.294716661	93.67	79	4	1	24	101	77879	77957	5e-29	117
SRR492388.293779001	100.00	63	0	0	1	63	98484	98546	5e-29	117
SRR492388.293779001	100.00	34	0	0	68	101	98505	98538	6e-13	63.9
SRR492388.293543051	100.00	48	0	0	1	48	77867	77914	1e-20	89.8
SRR492388.293543051	93.59	78	4	1	25	101	77879	77956	2e-28	115
SRR492388.292155562	98.36	61	0	1	1	60	1336	1396	1e-25	106
SRR492388.292155562	100.00	45	0	0	57	101	98612	98656	5e-19	84.2
SRR492388.291826211	100.00	21	0	0	1	21	77745	77725	1e-05	39.9
SRR492388.291826211	91.86	86	7	0	16	101	77718	77633	4e-30	121
SRR492388.290758942	100.00	48	0	0	1	48	77867	77914	1e-20	89.8
SRR492388.290758942	93.59	78	4	1	25	101	77879	77956	2e-28	115
SRR492388.290257791	100.00	62	0	0	1	62	27881	27820	2e-28	115
SRR492388.290257791	97.67	43	1	0	59	101	104336	104294	3e-16	75.0
SRR492388.290069262	93.59	78	4	1	1	77	77956	77879	2e-28	115
SRR492388.290069262	100.00	48	0	0	54	101	77914	77867	1e-20	89.8
SRR492388.289997772	93.83	81	4	1	1	80	77959	77879	4e-30	121
SRR492388.289997772	100.00	45	0	0	57	101	77914	77870	5e-19	84.2
SRR492388.289414682	100.00	78	0	0	1	78	108845	108768	2e-37	145
SRR492388.289414682	100.00	24	0	0	78	101	104278	104301	2e-07	45.4
SRR492388.28900952	98.53	68	1	0	1	68	94194	94127	4e-30	121
SRR492388.28900952	96.97	33	1	0	69	101	100345	100377	1e-10	56.5
SRR492388.288403572	100.00	81	0	0	1	81	107436	107356	5e-39	150
SRR492388.288403572	100.00	20	0	0	82	101	25459	25440	4e-05	38.1
SRR492388.288001032	100.00	79	0	0	1	79	107945	108023	6e-38	147
SRR492388.288001032	100.00	20	0	0	82	101	25599	25580	4e-05	38.1
SRR492388.287687331	91.36	81	3	4	1	79	37825	37747	3e-26	108
SRR492388.287687331	95.83	24	0	1	64	86	5830	5853	4e-05	38.1
SRR492388.287062072	98.67	75	0	1	1	75	93822	93895	2e-33	132
SRR492388.287062072	100.00	31	0	0	71	101	106471	106501	3e-11	58.4
SRR492388.285909762	100.00	48	0	0	1	48	77867	77914	1e-20	89.8
SRR492388.285909762	93.59	78	4	1	25	101	77879	77956	2e-28	115
SRR492388.285662111	100.00	74	0	0	1	74	96355	96282	4e-35	137
SRR492388.285662111	100.00	25	0	0	77	101	52406	52430	6e-08	47.3
SRR492388.285349571	97.44	39	1	0	1	39	5736	5774	5e-14	67.6
SRR492388.285349571	100.00	68	0	0	34	101	5814	5747	8e-32	126
SRR492388.285257031	100.00	34	0	0	1	34	60051	60018	6e-13	63.9
SRR492388.285257031	100.00	71	0	0	31	101	59999	60069	2e-33	132
SRR492388.285198362	100.00	55	0	0	1	55	63809	63755	1e-24	102
SRR492388.285198362	95.16	62	3	0	40	101	5476	5415	2e-23	99.0
SRR492388.284930481	100.00	21	0	0	1	21	30864	30844	1e-05	39.9
SRR492388.284930481	98.88	89	0	1	13	101	30844	30757	3e-41	158
SRR492388.283950142	100.00	62	0	0	1	62	19765	19704	2e-28	115
SRR492388.283950142	100.00	38	0	0	64	101	20070	20107	4e-15	71.3
SRR492388.283049042	100.00	41	0	0	1	41	23846	23886	8e-17	76.8
SRR492388.283049042	100.00	61	0	0	41	101	19347	19287	6e-28	113
SRR492388.283049032	100.00	41	0	0	1	41	23846	23886	8e-17	76.8
SRR492388.283049032	100.00	61	0	0	41	101	19347	19287	6e-28	113
SRR492388.28258001	100.00	29	0	0	1	29	75665	75637	4e-10	54.7
SRR492388.28258001	97.22	72	2	0	26	97	75626	75697	1e-30	122
SRR492388.282527101	96.10	77	2	1	1	77	97649	97724	3e-31	124
SRR492388.282527101	100.00	37	0	0	65	101	103038	103074	1e-14	69.4
SRR492388.280934932	88.00	75	8	1	1	75	4244	4317	4e-20	87.9
SRR492388.280934932	100.00	35	0	0	66	100	808	842	2e-13	65.8
SRR492388.280592781	95.12	41	1	1	1	40	26124	26164	6e-13	63.9
SRR492388.280592781	98.61	72	1	0	30	101	26179	26108	2e-32	128
SRR492388.28051732	100.00	47	0	0	1	47	77868	77914	4e-20	87.9
SRR492388.28051732	93.67	79	4	1	24	101	77879	77957	5e-29	117
SRR492388.280335942	95.06	81	4	0	1	81	28506	28586	2e-32	128
SRR492388.280335942	95.83	24	0	1	69	91	27839	27816	4e-05	38.1
SRR492388.280174261	100.00	61	0	0	1	61	112718	112778	6e-28	113
SRR492388.280174261	100.00	41	0	0	61	101	100660	100620	8e-17	76.8
SRR492388.279796181	100.00	48	0	0	1	48	77867	77914	1e-20	89.8
SRR492388.279796181	93.59	78	4	1	25	101	77879	77956	2e-28	115
SRR492388.279488232	100.00	61	0	0	1	61	57042	57102	6e-28	113
SRR492388.279488232	100.00	39	0	0	63	101	125599	125637	1e-15	73.1
SRR492388.279222402	100.00	65	0	0	1	65	1544	1608	4e-30	121
SRR492388.279222402	100.00	39	0	0	63	101	1589	1627	1e-15	73.1
SRR492388.27916881	100.00	75	0	0	1	75	50988	51062	1e-35	139
SRR492388.27916881	100.00	25	0	0	77	101	86424	86448	6e-08	47.3
SRR492388.278748331	100.00	71	0	0	1	71	31087	31017	2e-33	132
SRR492388.278748331	89.74	39	3	1	62	99	66715	66677	2e-08	49.1
SRR492388.276609912	100.00	55	0	0	1	55	103559	103505	1e-24	102
SRR492388.276609912	100.00	46	0	0	56	101	127711	127666	1e-19	86.1
SRR492388.276577671	97.62	42	1	0	1	42	97867	97826	1e-15	73.1
SRR492388.276577671	100.00	68	0	0	34	101	34533	34600	8e-32	126
SRR492388.275413881	96.88	32	0	1	1	32	117614	117644	1e-09	52.8
SRR492388.275413881	100.00	81	0	0	21	101	117606	117526	5e-39	150
SRR492388.275031422	100.00	24	0	0	1	24	30821	30844	2e-07	45.4
SRR492388.275031422	97.83	92	1	1	11	101	30838	30929	3e-41	158
SRR492388.274808161	100.00	28	0	0	1	28	88921	88894	1e-09	52.8
SRR492388.274808161	100.00	78	0	0	24	101	88881	88958	2e-37	145
SRR492388.274260191	92.65	68	5	0	1	68	83926	83993	2e-23	99.0
SRR492388.274260191	100.00	59	0	0	43	101	83993	83935	8e-27	110
SRR492388.27376761	100.00	54	0	0	1	54	57962	57909	5e-24	100
SRR492388.27376761	100.00	45	0	0	57	101	100789	100833	5e-19	84.2
SRR492388.273630501	91.89	37	3	0	3	39	21764	21728	1e-09	52.8
SRR492388.273630501	100.00	80	0	0	22	101	21728	21807	2e-38	148
SRR492388.27344132	93.75	80	4	1	1	79	77958	77879	1e-29	119
SRR492388.27344132	100.00	46	0	0	56	101	77914	77869	1e-19	86.1
SRR492388.273421391	100.00	84	0	0	1	84	102505	102588	1e-40	156
SRR492388.273421391	100.00	20	0	0	82	101	77631	77612	4e-05	38.1
SRR492388.272889892	100.00	59	0	0	1	59	29973	30031	8e-27	110
SRR492388.272889892	100.00	40	0	0	62	101	20439	20400	3e-16	75.0
SRR492388.272826761	100.00	75	0	0	1	75	84996	85070	1e-35	139
SRR492388.272826761	100.00	26	0	0	76	101	101383	101358	2e-08	49.1
SRR492388.272796781	100.00	46	0	0	1	46	77869	77914	1e-19	86.1
SRR492388.272796781	92.50	80	5	1	23	101	77879	77958	6e-28	113
SRR492388.272628912	100.00	74	0	0	1	74	100930	100857	4e-35	137
SRR492388.272628912	100.00	33	0	0	69	101	93421	93389	2e-12	62.1
SRR492388.270967851	95.00	40	2	0	1	40	81794	81755	6e-13	63.9
SRR492388.270967851	98.61	72	1	0	30	101	99005	98934	2e-32	128
SRR492388.270593262	89.23	65	7	0	28	92	654	590	2e-18	82.4
SRR492388.270593262	96.00	25	1	0	3	27	688	664	3e-06	41.7
SRR492388.270479452	100.00	70	0	0	1	70	33225	33294	6e-33	130
SRR492388.270479452	97.30	37	0	1	64	100	33451	33416	2e-12	62.1
SRR492388.270375671	98.67	75	0	1	1	75	14883	14810	2e-33	132
SRR492388.270375671	100.00	26	0	0	76	101	100312	100337	2e-08	49.1
SRR492388.270335711	100.00	71	0	0	1	71	35735	35805	2e-33	132
SRR492388.270335711	100.00	31	0	0	71	101	110017	109987	3e-11	58.4
SRR492388.270084982	100.00	72	0	0	1	72	81393	81464	5e-34	134
SRR492388.270084982	97.37	38	1	0	64	101	60460	60497	2e-13	65.8
SRR492388.270084981	97.37	38	1	0	1	38	60497	60460	2e-13	65.8
SRR492388.270084981	100.00	72	0	0	30	101	81464	81393	5e-34	134
SRR492388.270075631	100.00	38	0	0	1	38	35032	35069	4e-15	71.3
SRR492388.270075631	100.00	67	0	0	35	101	99987	100053	3e-31	124
SRR492388.269990951	88.89	45	5	0	1	45	122726	122682	1e-10	56.5
SRR492388.269990951	97.37	76	2	0	26	101	34526	34601	6e-33	130
SRR492388.269386721	100.00	57	0	0	1	57	21842	21898	1e-25	106
SRR492388.269386721	100.00	46	0	0	56	101	23724	23769	1e-19	86.1
SRR492388.268332352	100.00	69	0	0	1	69	101768	101836	2e-32	128
SRR492388.268332352	97.06	34	1	0	68	101	101823	101856	3e-11	58.4
SRR492388.268276971	96.72	61	2	0	1	61	91956	92016	1e-24	102
SRR492388.268276971	95.65	46	2	0	52	97	92022	91977	3e-16	75.0
SRR492388.267796592	100.00	45	0	0	1	45	77870	77914	5e-19	84.2
SRR492388.267796592	93.83	81	4	1	22	101	77879	77959	4e-30	121
SRR492388.266870181	94.79	96	4	1	1	95	77974	77879	2e-38	148
SRR492388.266870181	100.00	30	0	0	72	101	77914	77885	1e-10	56.5
SRR492388.266682511	95.00	80	3	1	1	79	77958	77879	3e-31	124
SRR492388.266682511	100.00	25	0	0	77	101	77893	77869	6e-08	47.3
SRR492388.266267912	100.00	60	0	0	1	60	10785	10844	2e-27	111
SRR492388.266267912	100.00	47	0	0	55	101	11030	10984	4e-20	87.9
SRR492388.264959712	98.86	88	0	1	1	87	30925	30838	1e-40	156
SRR492388.264959712	100.00	28	0	0	74	101	30844	30817	1e-09	52.8
SRR492388.264265151	100.00	65	0	0	1	65	94213	94149	4e-30	121
SRR492388.264265151	100.00	35	0	0	67	101	6970	7004	2e-13	65.8
SRR492388.26318672	88.37	43	4	1	1	42	77921	77879	5e-09	51.0
SRR492388.26318672	100.00	48	0	0	19	66	77914	77867	1e-20	89.8
SRR492388.262472371	100.00	25	0	0	1	25	74442	74418	6e-08	47.3
SRR492388.262472371	100.00	81	0	0	21	101	74407	74487	5e-39	150
SRR492388.262448471	100.00	26	0	0	1	26	4201	4176	2e-08	49.1
SRR492388.262448471	100.00	79	0	0	23	101	4151	4229	6e-38	147
SRR492388.262098611	100.00	64	0	0	1	64	89638	89701	1e-29	119
SRR492388.262098611	97.92	48	0	1	54	101	73556	73510	2e-18	82.4
SRR492388.262057561	100.00	27	0	0	1	27	108783	108757	5e-09	51.0
SRR492388.262057561	100.00	80	0	0	22	101	108748	108827	2e-38	148
SRR492388.261121141	100.00	65	0	0	1	65	90540	90604	4e-30	121
SRR492388.261121141	100.00	35	0	0	67	101	109029	108995	2e-13	65.8
SRR492388.260811851	97.14	35	1	0	1	35	86031	86065	8e-12	60.2
SRR492388.260811851	98.75	80	0	1	22	101	38362	38440	3e-36	141
SRR492388.260629971	100.00	46	0	0	1	46	77869	77914	1e-19	86.1
SRR492388.260629971	93.75	80	4	1	23	101	77879	77958	1e-29	119
SRR492388.260445981	100.00	87	0	0	1	87	109372	109458	2e-42	161
SRR492388.260445981	100.00	20	0	0	82	101	15376	15395	4e-05	38.1
SRR492388.25994901	100.00	22	0	0	1	22	30865	30844	3e-06	41.7
SRR492388.25994901	98.85	87	0	1	14	100	30844	30759	4e-40	154
SRR492388.259262672	100.00	75	0	0	1	75	1999	1925	1e-35	139
SRR492388.259262672	100.00	26	0	0	76	101	92994	92969	2e-08	49.1
SRR492388.259183852	96.00	25	1	0	1	25	688	664	3e-06	41.7
SRR492388.259183852	100.00	42	0	0	26	67	654	613	2e-17	78.7
SRR492388.259053701	100.00	47	0	0	1	47	43159	43205	4e-20	87.9
SRR492388.259053701	100.00	53	0	0	49	101	92154	92102	2e-23	99.0
SRR492388.258763762	96.43	28	0	1	1	28	66540	66566	2e-07	45.4
SRR492388.258763762	100.00	80	0	0	22	101	52908	52987	2e-38	148
SRR492388.258652891	100.00	64	0	0	1	64	100411	100474	1e-29	119
SRR492388.258652891	100.00	36	0	0	66	101	57364	57329	5e-14	67.6
SRR492388.258584912	100.00	79	0	0	1	79	58097	58019	6e-38	147
SRR492388.258584912	100.00	27	0	0	75	101	62437	62411	5e-09	51.0
SRR492388.258270942	100.00	65	0	0	1	65	85285	85349	4e-30	121
SRR492388.258270942	100.00	36	0	0	66	101	95950	95915	5e-14	67.6
SRR492388.258006012	100.00	29	0	0	1	29	105021	104993	4e-10	54.7
SRR492388.258006012	98.63	73	1	0	29	101	102550	102622	6e-33	130
SRR492388.257147232	89.23	65	7	0	26	90	654	590	2e-18	82.4
SRR492388.257147232	96.00	25	1	0	1	25	688	664	3e-06	41.7
SRR492388.256912011	100.00	45	0	0	1	45	40451	40495	5e-19	84.2
SRR492388.256912011	100.00	58	0	0	44	101	40339	40282	3e-26	108
SRR492388.256533672	100.00	80	0	0	1	80	93448	93527	2e-38	148
SRR492388.256533672	100.00	27	0	0	75	101	13256	13230	5e-09	51.0
SRR492388.255187352	100.00	47	0	0	1	47	74944	74898	4e-20	87.9
SRR492388.255187352	100.00	53	0	0	49	101	105635	105687	2e-23	99.0
SRR492388.254937461	100.00	73	0	0	1	73	87438	87510	1e-34	135
SRR492388.254937461	100.00	27	0	0	75	101	89823	89797	5e-09	51.0
SRR492388.254896452	98.51	67	1	0	1	67	91270	91336	1e-29	119
SRR492388.254896452	100.00	39	0	0	63	101	90317	90279	1e-15	73.1
SRR492388.254354331	100.00	35	0	0	1	35	35041	35075	2e-13	65.8
SRR492388.254354331	97.18	71	2	0	31	101	46847	46917	4e-30	121
SRR492388.254253181	100.00	66	0	0	1	66	98720	98655	1e-30	122
SRR492388.254253181	100.00	43	0	0	59	101	84668	84626	6e-18	80.5
SRR492388.254069472	100.00	80	0	0	1	80	98300	98379	2e-38	148
SRR492388.254069472	96.77	31	1	0	71	101	42630	42600	1e-09	52.8
SRR492388.253737672	100.00	47	0	0	1	47	77868	77914	4e-20	87.9
SRR492388.253737672	93.67	79	4	1	24	101	77879	77957	5e-29	117
SRR492388.253632201	98.81	84	0	1	1	83	30919	30836	2e-38	148
SRR492388.253632201	94.12	34	2	0	68	101	30844	30811	1e-09	52.8
SRR492388.252273212	100.00	77	0	0	1	77	110182	110258	8e-37	143
SRR492388.252273212	100.00	24	0	0	78	101	91689	91712	2e-07	45.4
SRR492388.252177571	100.00	76	0	0	1	76	31092	31017	3e-36	141
SRR492388.252177571	96.43	28	1	0	66	93	66715	66688	6e-08	47.3
SRR492388.251775301	100.00	49	0	0	1	49	70268	70316	3e-21	91.6
SRR492388.251775301	100.00	49	0	0	53	101	70287	70335	3e-21	91.6
SRR492388.251482282	100.00	35	0	0	1	35	40133	40167	2e-13	65.8
SRR492388.251482282	97.47	79	1	1	24	101	40111	40033	5e-34	134
SRR492388.250773602	100.00	71	0	0	1	71	67717	67787	2e-33	132
SRR492388.250773602	100.00	38	0	0	64	101	68036	67999	4e-15	71.3
SRR492388.250741021	100.00	71	0	0	1	71	17505	17575	2e-33	132
SRR492388.250741021	100.00	33	0	0	69	101	40802	40770	2e-12	62.1
SRR492388.250648831	96.00	25	1	0	3	27	688	664	3e-06	41.7
SRR492388.250648831	100.00	42	0	0	28	69	654	613	2e-17	78.7
SRR492388.25036972	100.00	51	0	0	1	51	96012	95962	2e-22	95.3
SRR492388.25036972	91.38	58	5	0	44	101	96041	96098	6e-18	80.5
SRR492388.25036971	98.80	83	1	0	1	83	96123	96041	2e-38	148
SRR492388.25036971	100.00	26	0	0	76	101	95962	95987	2e-08	49.1
SRR492388.249290492	100.00	45	0	0	1	45	102623	102667	5e-19	84.2
SRR492388.249290492	100.00	62	0	0	40	101	34536	34475	2e-28	115
SRR492388.247730461	94.79	96	4	1	1	95	77974	77879	2e-38	148
SRR492388.247730461	100.00	30	0	0	72	101	77914	77885	1e-10	56.5
SRR492388.247492611	98.89	90	0	1	1	89	30927	30838	8e-42	159
SRR492388.247492611	100.00	26	0	0	76	101	30844	30819	2e-08	49.1
SRR492388.246205802	100.00	71	0	0	1	71	101401	101331	2e-33	132
SRR492388.246205802	100.00	30	0	0	72	101	86191	86162	1e-10	56.5
SRR492388.245095902	100.00	70	0	0	1	70	91238	91307	6e-33	130
SRR492388.245095902	100.00	29	0	0	73	101	2170	2198	4e-10	54.7
SRR492388.244637971	100.00	26	0	0	1	26	100929	100904	2e-08	49.1
SRR492388.244637971	100.00	83	0	0	19	101	100921	101003	4e-40	154
SRR492388.244021502	93.18	44	3	0	1	44	15928	15971	2e-13	65.8
SRR492388.244021502	96.92	65	2	0	37	101	97342	97278	8e-27	110
SRR492388.243738702	100.00	30	0	0	1	30	77885	77914	1e-10	56.5
SRR492388.243738702	94.79	96	4	1	7	101	77879	77974	2e-38	148
SRR492388.243676811	98.04	51	1	0	1	51	12110	12060	1e-20	89.8
SRR492388.243676811	100.00	49	0	0	53	101	124709	124757	3e-21	91.6
SRR492388.243625462	100.00	20	0	0	1	20	30863	30844	4e-05	38.1
SRR492388.243625462	98.89	90	0	1	12	101	30844	30756	8e-42	159
SRR492388.242639862	100.00	68	0	0	1	68	34098	34165	8e-32	126
SRR492388.242639862	100.00	34	0	0	68	101	100299	100266	6e-13	63.9
SRR492388.242513872	100.00	70	0	0	1	70	55421	55490	6e-33	130
SRR492388.242513872	100.00	34	0	0	68	101	55477	55510	6e-13	63.9
SRR492388.242284141	96.55	29	0	1	1	28	98641	98669	6e-08	47.3
SRR492388.242284141	100.00	81	0	0	21	101	98688	98608	5e-39	150
SRR492388.241779012	100.00	82	0	0	1	82	30948	31029	1e-39	152
SRR492388.241779012	100.00	26	0	0	76	101	31017	31042	2e-08	49.1
SRR492388.240637612	96.47	85	1	2	1	84	93962	93879	1e-35	139
SRR492388.240637612	100.00	27	0	0	75	101	94947	94921	5e-09	51.0
SRR492388.240447451	100.00	54	0	0	1	54	18790	18843	5e-24	100
SRR492388.240447451	100.00	47	0	0	55	101	96482	96436	4e-20	87.9
SRR492388.2394601	93.18	44	3	0	1	44	109411	109368	2e-13	65.8
SRR492388.2394601	98.77	81	0	1	22	101	109319	109399	8e-37	143
SRR492388.239257641	100.00	48	0	0	1	48	77867	77914	1e-20	89.8
SRR492388.239257641	93.59	78	4	1	25	101	77879	77956	2e-28	115
SRR492388.239206321	93.33	60	3	1	1	59	103819	103878	4e-20	87.9
SRR492388.239206321	100.00	61	0	0	41	101	18919	18979	6e-28	113
SRR492388.239162542	100.00	28	0	0	1	28	30817	30844	1e-09	52.8
SRR492388.239162542	98.86	88	0	1	15	101	30838	30925	1e-40	156
SRR492388.239123091	97.14	35	0	1	1	35	84752	84719	3e-11	58.4
SRR492388.239123091	100.00	76	0	0	26	101	53973	53898	3e-36	141
SRR492388.238526581	100.00	38	0	0	4	41	39978	40015	4e-15	71.3
SRR492388.238526581	100.00	65	0	0	37	101	40259	40195	4e-30	121
SRR492388.237812701	100.00	47	0	0	1	47	77868	77914	4e-20	87.9
SRR492388.237812701	93.67	79	4	1	24	101	77879	77957	5e-29	117
SRR492388.237624962	100.00	30	0	0	1	30	77885	77914	1e-10	56.5
SRR492388.237624962	94.79	96	4	1	7	101	77879	77974	2e-38	148
SRR492388.237099402	100.00	78	0	0	1	78	108845	108768	2e-37	145
SRR492388.237099402	100.00	24	0	0	78	101	104278	104301	2e-07	45.4
SRR492388.236858692	100.00	80	0	0	1	80	97535	97614	2e-38	148
SRR492388.236858692	100.00	23	0	0	79	101	72023	72001	8e-07	43.6
SRR492388.236099992	98.89	90	0	1	1	89	30927	30838	8e-42	159
SRR492388.236099992	100.00	26	0	0	76	101	30844	30819	2e-08	49.1
SRR492388.236018592	100.00	62	0	0	1	62	11105	11044	2e-28	115
SRR492388.236018592	100.00	38	0	0	64	101	126676	126713	4e-15	71.3
SRR492388.235910511	100.00	50	0	0	1	50	108496	108447	8e-22	93.5
SRR492388.235910511	100.00	49	0	0	53	101	41895	41847	3e-21	91.6
SRR492388.235742311	100.00	30	0	0	1	30	77885	77914	1e-10	56.5
SRR492388.235742311	94.79	96	4	1	7	101	77879	77974	2e-38	148
SRR492388.235536551	100.00	80	0	0	1	80	86867	86788	2e-38	148
SRR492388.235536551	100.00	20	0	0	82	101	94939	94958	4e-05	38.1
SRR492388.235265322	100.00	69	0	0	1	69	19666	19734	2e-32	128
SRR492388.235265322	100.00	30	0	0	72	101	93680	93651	1e-10	56.5
SRR492388.235209822	100.00	62	0	0	1	62	19405	19344	2e-28	115
SRR492388.235209822	100.00	40	0	0	62	101	90333	90294	3e-16	75.0
SRR492388.234880862	94.79	96	4	1	1	95	77974	77879	2e-38	148
SRR492388.234880862	100.00	30	0	0	72	101	77914	77885	1e-10	56.5
SRR492388.233250572	100.00	46	0	0	1	46	77869	77914	1e-19	86.1
SRR492388.233250572	93.75	80	4	1	23	101	77879	77958	1e-29	119
SRR492388.232781481	100.00	40	0	0	1	40	1163	1124	3e-16	75.0
SRR492388.232781481	100.00	59	0	0	43	101	101913	101855	8e-27	110
SRR492388.232554172	100.00	74	0	0	1	74	43610	43537	4e-35	137
SRR492388.232554172	100.00	26	0	0	76	101	4419	4394	2e-08	49.1
SRR492388.231722192	100.00	51	0	0	1	51	40019	39969	2e-22	95.3
SRR492388.231722192	98.00	50	1	0	52	101	8745	8696	4e-20	87.9
SRR492388.231704351	100.00	72	0	0	1	72	63567	63496	5e-34	134
SRR492388.231704351	100.00	31	0	0	71	101	63480	63450	3e-11	58.4
SRR492388.23132351	100.00	26	0	0	1	26	82639	82614	2e-08	49.1
SRR492388.23132351	100.00	81	0	0	17	97	82270	82190	5e-39	150
SRR492388.231293802	100.00	75	0	0	1	75	6928	6854	1e-35	139
SRR492388.231293802	92.31	26	2	0	61	86	8750	8725	4e-05	38.1
SRR492388.230959142	100.00	36	0	0	1	36	99848	99813	5e-14	67.6
SRR492388.230959142	98.59	71	1	0	31	101	99609	99679	8e-32	126
SRR492388.229458942	100.00	77	0	0	1	77	20834	20910	8e-37	143
SRR492388.229458942	100.00	26	0	0	76	101	102554	102579	2e-08	49.1
SRR492388.229106392	100.00	63	0	0	1	63	77852	77914	5e-29	117
SRR492388.229106392	100.00	25	0	0	77	101	77917	77941	6e-08	47.3
SRR492388.227953912	94.79	96	4	1	1	95	77974	77879	2e-38	148
SRR492388.227953912	100.00	30	0	0	72	101	77914	77885	1e-10	56.5
SRR492388.227890621	100.00	31	0	0	1	31	92250	92280	3e-11	58.4
SRR492388.227890621	100.00	75	0	0	27	101	92303	92229	1e-35	139
SRR492388.227537601	97.26	73	1	1	1	72	14746	14674	1e-30	122
SRR492388.227537601	100.00	33	0	0	69	101	91623	91591	2e-12	62.1
SRR492388.225336711	100.00	23	0	0	1	23	30866	30844	8e-07	43.6
SRR492388.225336711	97.70	87	1	1	15	101	30844	30759	2e-38	148
SRR492388.225036682	100.00	46	0	0	1	46	77869	77914	1e-19	86.1
SRR492388.225036682	93.75	80	4	1	23	101	77879	77958	1e-29	119
SRR492388.224999061	100.00	81	0	0	1	81	60823	60743	5e-39	150
SRR492388.224999061	100.00	23	0	0	79	101	51867	51889	8e-07	43.6
SRR492388.224674861	100.00	48	0	0	1	48	77867	77914	1e-20	89.8
SRR492388.224674861	93.59	78	4	1	25	101	77879	77956	2e-28	115
SRR492388.224420471	96.55	29	0	1	1	28	78838	78866	6e-08	47.3
SRR492388.224420471	100.00	80	0	0	22	101	78884	78805	2e-38	148
SRR492388.224343891	100.00	49	0	0	1	49	40044	39996	3e-21	91.6
SRR492388.224343891	100.00	57	0	0	45	101	39910	39966	1e-25	106
SRR492388.223575131	94.62	93	2	2	1	91	92742	92833	3e-36	141
SRR492388.223575131	100.00	36	0	0	66	101	35019	35054	5e-14	67.6
SRR492388.223325251	100.00	28	0	0	1	28	113783	113810	1e-09	52.8
SRR492388.223325251	98.85	87	0	1	16	101	113830	113916	4e-40	154
SRR492388.223086332	100.00	67	0	0	1	67	110846	110780	3e-31	124
SRR492388.223086332	100.00	32	0	0	70	101	105142	105173	8e-12	60.2
SRR492388.222807522	100.00	53	0	0	1	53	89787	89735	2e-23	99.0
SRR492388.222807522	100.00	47	0	0	55	101	32688	32734	4e-20	87.9
SRR492388.222489741	96.43	28	1	0	1	28	88921	88894	6e-08	47.3
SRR492388.222489741	100.00	78	0	0	24	101	88881	88958	2e-37	145
SRR492388.222379931	100.00	49	0	0	1	49	70268	70316	3e-21	91.6
SRR492388.222379931	100.00	49	0	0	53	101	70287	70335	3e-21	91.6
SRR492388.222124572	100.00	50	0	0	1	50	127222	127271	8e-22	93.5
SRR492388.222124572	98.33	60	1	0	42	101	66106	66165	1e-25	106
SRR492388.222039341	100.00	24	0	0	1	24	27681	27704	2e-07	45.4
SRR492388.222039341	95.59	68	3	0	29	96	69423	69490	8e-27	110
SRR492388.221756741	90.63	64	1	4	1	62	95760	95820	6e-18	80.5
SRR492388.221756741	98.61	72	0	1	30	101	95820	95750	8e-32	126
SRR492388.221394092	100.00	80	0	0	1	80	37113	37192	2e-38	148
SRR492388.221394092	91.67	36	2	1	66	101	104607	104641	2e-08	49.1
SRR492388.220558631	93.67	79	4	1	1	78	77957	77879	5e-29	117
SRR492388.220558631	100.00	44	0	0	55	98	77914	77871	2e-18	82.4
SRR492388.220073651	100.00	31	0	0	1	31	87645	87615	3e-11	58.4
SRR492388.220073651	100.00	76	0	0	26	101	87675	87750	3e-36	141
SRR492388.219310912	100.00	75	0	0	1	75	20807	20881	1e-35	139
SRR492388.219310912	100.00	24	0	0	78	101	103481	103504	2e-07	45.4
SRR492388.219267771	98.57	70	1	0	1	70	105419	105488	3e-31	124
SRR492388.219267771	100.00	29	0	0	73	101	117128	117156	4e-10	54.7
SRR492388.218707342	100.00	46	0	0	1	46	77869	77914	1e-19	86.1
SRR492388.218707342	93.75	80	4	1	23	101	77879	77958	1e-29	119
SRR492388.218573942	100.00	28	0	0	1	28	30817	30844	1e-09	52.8
SRR492388.218573942	98.86	88	0	1	15	101	30838	30925	1e-40	156
SRR492388.21666042	100.00	57	0	0	1	57	107222	107166	1e-25	106
SRR492388.21666042	100.00	42	0	0	60	101	41639	41680	2e-17	78.7
SRR492388.216241261	98.80	83	0	1	1	83	3167	3086	6e-38	147
SRR492388.216241261	100.00	20	0	0	82	101	108745	108764	4e-05	38.1
SRR492388.215363422	100.00	66	0	0	1	66	81073	81008	1e-30	122
SRR492388.215363422	97.50	40	0	1	63	101	80717	80678	5e-14	67.6
SRR492388.215073782	100.00	35	0	0	1	35	54599	54565	2e-13	65.8
SRR492388.215073782	100.00	80	0	0	22	101	4351	4272	2e-38	148
SRR492388.214853921	100.00	20	0	0	1	20	30863	30844	4e-05	38.1
SRR492388.214853921	96.67	90	2	1	12	101	30844	30756	2e-38	148
SRR492388.214841031	100.00	38	0	0	1	38	102780	102817	4e-15	71.3
SRR492388.214841031	96.30	27	1	0	75	101	102804	102830	2e-07	45.4
SRR492388.213363031	100.00	65	0	0	1	65	32946	33010	4e-30	121
SRR492388.213363031	97.56	41	0	1	62	101	40121	40081	1e-14	69.4
SRR492388.212806682	100.00	55	0	0	1	55	106088	106034	1e-24	102
SRR492388.212806682	100.00	47	0	0	55	101	70908	70862	4e-20	87.9
SRR492388.21277001	100.00	24	0	0	1	24	30820	30843	2e-07	45.4
SRR492388.21277001	97.80	91	1	1	12	101	30838	30928	1e-40	156
SRR492388.212767232	100.00	27	0	0	1	27	30870	30844	5e-09	51.0
SRR492388.212767232	100.00	42	0	0	19	60	30844	30803	2e-17	78.7
SRR492388.212767231	100.00	41	0	0	1	41	30804	30844	8e-17	76.8
SRR492388.212767231	100.00	27	0	0	33	59	30844	30870	5e-09	51.0
SRR492388.211080232	100.00	51	0	0	1	51	5614	5564	2e-22	95.3
SRR492388.211080232	100.00	53	0	0	49	101	5534	5482	2e-23	99.0
SRR492388.211073041	100.00	49	0	0	1	49	46528	46576	3e-21	91.6
SRR492388.211073041	100.00	39	0	0	63	101	46651	46689	1e-15	73.1
SRR492388.209780032	100.00	75	0	0	1	75	6928	6854	1e-35	139
SRR492388.209780032	92.31	26	2	0	61	86	8750	8725	4e-05	38.1
SRR492388.209361982	100.00	72	0	0	1	72	67057	67128	5e-34	134
SRR492388.209361982	92.31	26	2	0	76	101	168	193	4e-05	38.1
SRR492388.20902591	100.00	77	0	0	1	77	45849	45773	8e-37	143
SRR492388.20902591	100.00	23	0	0	79	101	118564	118542	8e-07	43.6
SRR492388.208895771	100.00	58	0	0	1	58	97179	97236	3e-26	108
SRR492388.208895771	100.00	42	0	0	60	101	93219	93260	2e-17	78.7
SRR492388.208752551	100.00	77	0	0	1	77	46209	46133	8e-37	143
SRR492388.208752551	100.00	22	0	0	80	101	107847	107826	3e-06	41.7
SRR492388.20863091	100.00	65	0	0	1	65	94213	94149	4e-30	121
SRR492388.20863091	100.00	35	0	0	67	101	6970	7004	2e-13	65.8
SRR492388.208321161	100.00	70	0	0	1	70	105419	105488	6e-33	130
SRR492388.208321161	100.00	29	0	0	73	101	117128	117156	4e-10	54.7
SRR492388.207929271	100.00	44	0	0	1	44	77871	77914	2e-18	82.4
SRR492388.207929271	93.90	82	4	1	21	101	77879	77960	1e-30	122
SRR492388.207334591	100.00	72	0	0	1	72	74942	75013	5e-34	134
SRR492388.207334591	96.77	31	0	1	70	100	70186	70215	5e-09	51.0
SRR492388.207313961	100.00	78	0	0	1	78	31094	31017	2e-37	145
SRR492388.207313961	93.10	29	2	0	69	97	66715	66687	8e-07	43.6
SRR492388.20705891	89.29	84	9	0	1	84	39712	39795	1e-25	106
SRR492388.20705891	100.00	64	0	0	38	101	37534	37597	1e-29	119
SRR492388.206384362	98.44	64	1	0	1	64	89519	89456	6e-28	113
SRR492388.206384362	100.00	37	0	0	65	101	126752	126788	1e-14	69.4
SRR492388.206362021	96.43	28	1	0	1	28	123898	123925	6e-08	47.3
SRR492388.206362021	100.00	78	0	0	24	101	123936	123859	2e-37	145
SRR492388.205728922	100.00	73	0	0	1	73	123928	124000	1e-34	135
SRR492388.205728922	100.00	27	0	0	75	101	55946	55920	5e-09	51.0
SRR492388.204085672	100.00	29	0	0	1	29	994	1022	4e-10	54.7
SRR492388.204085672	100.00	78	0	0	24	101	963	886	2e-37	145
SRR492388.203003691	100.00	50	0	0	1	50	106960	106911	8e-22	93.5
SRR492388.203003691	100.00	47	0	0	53	99	107577	107531	4e-20	87.9
SRR492388.202478431	100.00	23	0	0	1	23	65229	65207	8e-07	43.6
SRR492388.202478431	97.59	83	2	0	19	101	65192	65274	8e-37	143
SRR492388.201960441	100.00	77	0	0	1	77	95340	95264	8e-37	143
SRR492388.201960441	100.00	25	0	0	77	101	89414	89438	6e-08	47.3
SRR492388.200995281	98.89	90	0	1	1	90	30756	30844	8e-42	159
SRR492388.200995281	100.00	20	0	0	82	101	30844	30863	4e-05	38.1
SRR492388.199162312	100.00	68	0	0	1	68	102552	102485	8e-32	126
SRR492388.199162312	100.00	32	0	0	70	101	35407	35438	8e-12	60.2
SRR492388.199076871	100.00	48	0	0	1	48	77867	77914	1e-20	89.8
SRR492388.199076871	93.59	78	4	1	25	101	77879	77956	2e-28	115
SRR492388.198928402	98.85	87	0	1	1	86	30922	30836	4e-40	154
SRR492388.198928402	96.55	29	0	1	74	101	30842	30814	6e-08	47.3
SRR492388.198775911	100.00	22	0	0	1	22	30865	30844	3e-06	41.7
SRR492388.198775911	98.85	87	0	1	14	100	30844	30759	4e-40	154
SRR492388.198001902	100.00	46	0	0	1	46	56219	56264	1e-19	86.1
SRR492388.198001902	100.00	61	0	0	41	101	56108	56048	6e-28	113
SRR492388.19745731	100.00	56	0	0	1	56	4316	4371	4e-25	104
SRR492388.19745731	100.00	45	0	0	57	101	107383	107427	5e-19	84.2
SRR492388.196007841	98.59	71	1	0	1	71	98505	98435	8e-32	126
SRR492388.196007841	100.00	37	0	0	65	101	105240	105204	1e-14	69.4
SRR492388.1954421	98.86	88	0	1	1	87	30925	30838	1e-40	156
SRR492388.1954421	100.00	28	0	0	74	101	30844	30817	1e-09	52.8
SRR492388.195192341	96.43	28	1	0	1	28	88921	88894	6e-08	47.3
SRR492388.195192341	100.00	78	0	0	24	101	88881	88958	2e-37	145
SRR492388.194930081	100.00	25	0	0	1	25	73344	73320	6e-08	47.3
SRR492388.194930081	97.50	80	2	0	20	99	73307	73386	4e-35	137
SRR492388.194323821	98.78	82	0	1	1	82	91710	91790	2e-37	145
SRR492388.194323821	100.00	24	0	0	78	101	91084	91061	2e-07	45.4
SRR492388.193376642	100.00	48	0	0	1	48	77867	77914	1e-20	89.8
SRR492388.193376642	93.59	78	4	1	25	101	77879	77956	2e-28	115
SRR492388.193130201	93.90	82	4	1	1	81	77960	77879	1e-30	122
SRR492388.193130201	100.00	44	0	0	58	101	77914	77871	2e-18	82.4
SRR492388.192715302	100.00	39	0	0	1	39	58406	58368	1e-15	73.1
SRR492388.192715302	100.00	60	0	0	42	101	38225	38166	2e-27	111
SRR492388.192455561	100.00	26	0	0	1	26	71211	71236	2e-08	49.1
SRR492388.192455561	100.00	79	0	0	23	101	15567	15645	6e-38	147
SRR492388.191545092	98.85	87	0	1	1	86	30924	30838	4e-40	154
SRR492388.191545092	100.00	28	0	0	73	100	30844	30817	1e-09	52.8
SRR492388.191473812	98.36	61	1	0	1	61	96533	96473	3e-26	108
SRR492388.191473812	100.00	45	0	0	57	101	96509	96465	5e-19	84.2
SRR492388.188662172	100.00	21	0	0	1	21	97408	97428	1e-05	39.9
SRR492388.188662172	96.59	88	3	0	14	101	97611	97524	6e-38	147
SRR492388.188480201	95.12	41	2	0	2	42	39378	39418	2e-13	65.8
SRR492388.188480201	98.67	75	0	1	27	101	39450	39377	2e-33	132
SRR492388.188248481	100.00	83	0	0	1	83	30947	31029	4e-40	154
SRR492388.188248481	100.00	24	0	0	77	100	31017	31040	2e-07	45.4
SRR492388.188163131	100.00	30	0	0	1	30	77885	77914	1e-10	56.5
SRR492388.188163131	94.79	96	4	1	7	101	77879	77974	2e-38	148
SRR492388.187906962	100.00	68	0	0	1	68	101656	101723	8e-32	126
SRR492388.187906962	100.00	34	0	0	68	101	92474	92507	6e-13	63.9
SRR492388.184656581	100.00	65	0	0	1	65	72936	72872	4e-30	121
SRR492388.184656581	100.00	33	0	0	68	100	105543	105575	2e-12	62.1
SRR492388.184497722	100.00	54	0	0	1	54	26265	26318	5e-24	100
SRR492388.184497722	100.00	47	0	0	55	101	124090	124136	4e-20	87.9
SRR492388.184128762	100.00	42	0	0	1	42	27946	27987	2e-17	78.7
SRR492388.184128762	100.00	58	0	0	44	101	100640	100697	3e-26	108
SRR492388.183654332	100.00	30	0	0	1	30	77885	77914	1e-10	56.5
SRR492388.183654332	94.79	96	4	1	7	101	77879	77974	2e-38	148
SRR492388.18343941	100.00	53	0	0	1	53	32776	32724	2e-23	99.0
SRR492388.18343941	100.00	64	0	0	38	101	32724	32787	1e-29	119
SRR492388.182972821	100.00	57	0	0	1	57	21824	21880	1e-25	106
SRR492388.182972821	100.00	46	0	0	56	101	85847	85802	1e-19	86.1
SRR492388.182598161	100.00	33	0	0	1	33	27672	27704	2e-12	62.1
SRR492388.182598161	95.31	64	3	0	38	101	69423	69486	1e-24	102
SRR492388.182514771	100.00	43	0	0	1	43	126841	126799	6e-18	80.5
SRR492388.182514771	100.00	58	0	0	44	101	105258	105315	3e-26	108
SRR492388.1823691	100.00	61	0	0	1	61	49640	49580	6e-28	113
SRR492388.1823691	100.00	47	0	0	55	101	49415	49461	4e-20	87.9
SRR492388.182169061	98.61	72	0	1	1	72	88235	88305	8e-32	126
SRR492388.182169061	100.00	31	0	0	71	101	35548	35578	3e-11	58.4
SRR492388.182140081	100.00	43	0	0	1	43	105905	105863	6e-18	80.5
SRR492388.182140081	100.00	56	0	0	46	101	89966	90021	4e-25	104
SRR492388.181750522	98.70	77	1	0	1	77	14284	14208	4e-35	137
SRR492388.181750522	100.00	23	0	0	79	101	105721	105743	8e-07	43.6
SRR492388.181057051	92.59	81	4	2	1	80	37826	37747	2e-28	115
SRR492388.181057051	95.83	24	0	1	65	87	5830	5853	4e-05	38.1
SRR492388.180575722	100.00	53	0	0	1	53	3355	3407	2e-23	99.0
SRR492388.180575722	98.25	57	0	1	46	101	55512	55456	2e-23	99.0
SRR492388.180104162	100.00	72	0	0	1	72	96393	96464	5e-34	134
SRR492388.180104162	94.74	38	1	1	64	101	95912	95876	3e-11	58.4
SRR492388.179306512	100.00	21	0	0	1	21	77745	77725	1e-05	39.9
SRR492388.179306512	91.86	86	7	0	16	101	77718	77633	4e-30	121
SRR492388.179067112	100.00	64	0	0	1	64	83653	83590	1e-29	119
SRR492388.179067112	100.00	42	0	0	60	101	83615	83574	2e-17	78.7
SRR492388.177768012	93.90	82	4	1	1	81	77960	77879	1e-30	122
SRR492388.177768012	100.00	44	0	0	58	101	77914	77871	2e-18	82.4
SRR492388.177552882	100.00	42	0	0	1	42	52715	52756	2e-17	78.7
SRR492388.177552882	100.00	63	0	0	39	101	52687	52625	5e-29	117
SRR492388.177118372	100.00	30	0	0	1	30	77885	77914	1e-10	56.5
SRR492388.177118372	94.79	96	4	1	7	101	77879	77974	2e-38	148
SRR492388.176897641	96.00	25	1	0	4	28	688	664	3e-06	41.7
SRR492388.176897641	100.00	42	0	0	29	70	654	613	2e-17	78.7
SRR492388.176697972	100.00	74	0	0	1	74	95831	95904	4e-35	137
SRR492388.176697972	96.55	29	0	1	73	101	92018	92045	6e-08	47.3
SRR492388.176229471	98.89	90	0	1	1	90	30756	30844	8e-42	159
SRR492388.176229471	100.00	20	0	0	82	101	30844	30863	4e-05	38.1
SRR492388.176159361	100.00	31	0	0	1	31	45388	45418	3e-11	58.4
SRR492388.176159361	96.15	26	1	0	75	100	45387	45412	8e-07	43.6
SRR492388.176071722	100.00	45	0	0	1	45	77870	77914	5e-19	84.2
SRR492388.176071722	93.83	81	4	1	22	101	77879	77959	4e-30	121
SRR492388.176014002	100.00	27	0	0	1	27	24277	24251	5e-09	51.0
SRR492388.176014002	100.00	80	0	0	22	101	24112	24191	2e-38	148
SRR492388.175971721	100.00	33	0	0	1	33	92695	92663	2e-12	62.1
SRR492388.175971721	100.00	74	0	0	28	101	92578	92651	4e-35	137
SRR492388.174977961	100.00	82	0	0	1	82	89868	89787	1e-39	152
SRR492388.174977961	100.00	20	0	0	82	101	100578	100597	4e-05	38.1
SRR492388.173537922	100.00	55	0	0	1	55	95148	95094	1e-24	102
SRR492388.173537922	100.00	60	0	0	42	101	95179	95238	2e-27	111
SRR492388.173223891	100.00	69	0	0	1	69	98035	97967	2e-32	128
SRR492388.173223891	100.00	41	0	0	61	101	97761	97801	8e-17	76.8
SRR492388.172970482	100.00	48	0	0	1	48	87675	87722	1e-20	89.8
SRR492388.172970482	100.00	52	0	0	50	101	110316	110367	6e-23	97.1
SRR492388.172970481	100.00	30	0	0	1	30	128184	128213	1e-10	56.5
SRR492388.172970481	100.00	70	0	0	32	101	110434	110365	6e-33	130
SRR492388.172657902	100.00	58	0	0	1	58	89606	89663	3e-26	108
SRR492388.172657902	100.00	49	0	0	53	101	89260	89212	3e-21	91.6
SRR492388.172657901	100.00	84	0	0	1	84	89177	89260	1e-40	156
SRR492388.172657901	100.00	23	0	0	79	101	89663	89641	8e-07	43.6
SRR492388.172201161	100.00	59	0	0	1	59	35901	35843	8e-27	110
SRR492388.172201161	100.00	41	0	0	61	101	87769	87729	8e-17	76.8
SRR492388.17193161	100.00	29	0	0	1	29	14763	14791	4e-10	54.7
SRR492388.17193161	100.00	78	0	0	24	101	14807	14730	2e-37	145
SRR492388.171887751	100.00	23	0	0	1	23	105609	105631	8e-07	43.6
SRR492388.171887751	98.80	83	1	0	19	101	105649	105567	2e-38	148
SRR492388.17140072	100.00	56	0	0	1	56	56963	56908	4e-25	104
SRR492388.17140072	93.75	64	3	1	39	101	44639	44576	2e-22	95.3
SRR492388.171243612	100.00	41	0	0	1	41	108916	108876	8e-17	76.8
SRR492388.171243612	100.00	53	0	0	44	96	98488	98436	2e-23	99.0
SRR492388.17032441	100.00	62	0	0	1	62	106416	106355	2e-28	115
SRR492388.17032441	91.89	37	3	0	65	101	10914	10950	1e-09	52.8
SRR492388.169768411	100.00	63	0	0	1	63	6175	6113	5e-29	117
SRR492388.169768411	100.00	46	0	0	56	101	39282	39237	1e-19	86.1
SRR492388.169714472	98.31	59	0	1	1	59	86118	86175	1e-24	102
SRR492388.169714472	100.00	46	0	0	56	101	91277	91232	1e-19	86.1
SRR492388.169524281	97.96	49	1	0	1	49	61	13	1e-19	86.1
SRR492388.169524281	98.25	57	1	0	45	101	84181	84125	5e-24	100
SRR492388.169275182	100.00	23	0	0	1	23	30866	30844	8e-07	43.6
SRR492388.169275182	89.66	58	5	1	15	71	30844	30787	1e-15	73.1
SRR492388.169260852	98.48	66	1	0	1	66	99659	99594	5e-29	117
SRR492388.169260852	100.00	35	0	0	67	101	98554	98588	2e-13	65.8
SRR492388.168052321	92.86	56	2	2	1	55	57310	57364	6e-18	80.5
SRR492388.168052321	100.00	69	0	0	33	101	57364	57296	2e-32	128
SRR492388.167670181	100.00	76	0	0	1	76	124709	124634	3e-36	141
SRR492388.167670181	100.00	27	0	0	75	101	57760	57786	5e-09	51.0
SRR492388.167668361	88.89	54	4	2	1	53	75895	75843	2e-13	65.8
SRR492388.167668361	100.00	77	0	0	25	101	75843	75919	8e-37	143
SRR492388.167303241	100.00	31	0	0	1	31	96009	95979	3e-11	58.4
SRR492388.167303241	100.00	78	0	0	24	101	96010	96087	2e-37	145
SRR492388.167158392	100.00	65	0	0	1	65	51132	51068	4e-30	121
SRR492388.167158392	100.00	35	0	0	67	101	76496	76462	2e-13	65.8
SRR492388.166900091	100.00	78	0	0	1	78	73280	73203	2e-37	145
SRR492388.166900091	100.00	22	0	0	80	101	66841	66862	3e-06	41.7
SRR492388.166713421	100.00	24	0	0	1	24	123426	123403	2e-07	45.4
SRR492388.166713421	98.81	84	1	0	18	101	55502	55585	5e-39	150
SRR492388.166365582	93.55	31	2	0	54	84	29832	29802	6e-08	47.3
SRR492388.166365582	93.88	49	3	0	3	51	99972	99924	3e-16	75.0
SRR492388.166365581	97.67	43	1	0	2	44	27662	27704	3e-16	75.0
SRR492388.166365581	94.34	53	3	0	49	101	69423	69475	2e-18	82.4
SRR492388.165762661	84.62	52	4	4	1	50	92917	92966	2e-08	49.1
SRR492388.165762661	100.00	81	0	0	21	101	92977	92897	5e-39	150
SRR492388.165720571	100.00	71	0	0	1	71	94920	94850	2e-33	132
SRR492388.165720571	100.00	31	0	0	71	101	61279	61309	3e-11	58.4
SRR492388.165173872	100.00	70	0	0	1	70	98098	98167	6e-33	130
SRR492388.165173872	100.00	29	0	0	73	101	114913	114885	4e-10	54.7
SRR492388.16416371	96.43	28	1	0	1	28	123898	123925	6e-08	47.3
SRR492388.16416371	100.00	78	0	0	24	101	123936	123859	2e-37	145
SRR492388.163884472	100.00	48	0	0	1	48	77867	77914	1e-20	89.8
SRR492388.163884472	93.59	78	4	1	25	101	77879	77956	2e-28	115
SRR492388.163592401	100.00	77	0	0	1	77	93668	93744	8e-37	143
SRR492388.163592401	86.84	38	3	2	51	88	42002	41967	3e-06	41.7
SRR492388.163465511	100.00	78	0	0	1	78	102868	102945	2e-37	145
SRR492388.163465511	100.00	21	0	0	81	101	34838	34818	1e-05	39.9
SRR492388.163268392	100.00	69	0	0	1	69	64144	64076	2e-32	128
SRR492388.163268392	100.00	31	0	0	71	101	68048	68018	3e-11	58.4
SRR492388.162878741	100.00	21	0	0	1	21	30864	30844	1e-05	39.9
SRR492388.162878741	98.88	89	0	1	13	101	30844	30757	3e-41	158
SRR492388.162188282	100.00	70	0	0	1	70	14048	14117	6e-33	130
SRR492388.162188282	100.00	30	0	0	72	101	108703	108732	1e-10	56.5
SRR492388.161481692	98.73	79	1	0	1	79	90331	90409	3e-36	141
SRR492388.161481692	100.00	24	0	0	78	101	34204	34227	2e-07	45.4
SRR492388.161409142	100.00	41	0	0	1	41	84211	84171	8e-17	76.8
SRR492388.161409142	100.00	45	0	0	57	101	31812	31856	5e-19	84.2
SRR492388.161336632	100.00	50	0	0	1	50	1511	1560	8e-22	93.5
SRR492388.161336632	100.00	51	0	0	51	101	441	491	2e-22	95.3
SRR492388.159755982	100.00	79	0	0	1	79	95443	95521	6e-38	147
SRR492388.159755982	100.00	24	0	0	78	101	95507	95530	2e-07	45.4
SRR492388.159419722	98.89	90	0	1	1	89	30927	30838	8e-42	159
SRR492388.159419722	100.00	26	0	0	76	101	30844	30819	2e-08	49.1
SRR492388.15823411	95.24	42	2	0	1	42	106226	106185	5e-14	67.6
SRR492388.15823411	98.44	64	1	0	34	97	106116	106179	6e-28	113
SRR492388.157990221	100.00	37	0	0	1	37	100158	100194	1e-14	69.4
SRR492388.157990221	100.00	69	0	0	33	101	100253	100185	2e-32	128
SRR492388.157906051	98.80	83	1	0	1	83	62232	62150	2e-38	148
SRR492388.157906051	100.00	21	0	0	81	101	20586	20566	1e-05	39.9
SRR492388.157332952	100.00	41	0	0	1	41	91725	91765	8e-17	76.8
SRR492388.157332952	98.44	64	1	0	38	101	3002	3065	6e-28	113
SRR492388.157261881	100.00	44	0	0	1	44	77871	77914	2e-18	82.4
SRR492388.157261881	93.90	82	4	1	21	101	77879	77960	1e-30	122
SRR492388.157203722	100.00	62	0	0	1	62	105030	104969	2e-28	115
SRR492388.157203722	100.00	45	0	0	57	101	105061	105105	5e-19	84.2
SRR492388.156283081	100.00	48	0	0	1	48	39251	39204	1e-20	89.8
SRR492388.156283081	100.00	54	0	0	48	101	85771	85718	5e-24	100
SRR492388.155800172	93.83	81	4	1	1	80	77959	77879	4e-30	121
SRR492388.155800172	100.00	45	0	0	57	101	77914	77870	5e-19	84.2
SRR492388.155773061	100.00	76	0	0	1	76	42639	42564	3e-36	141
SRR492388.155773061	100.00	26	0	0	76	101	94686	94711	2e-08	49.1
SRR492388.155036152	100.00	58	0	0	1	58	568	511	3e-26	108
SRR492388.155036152	100.00	42	0	0	60	101	78813	78854	2e-17	78.7
SRR492388.154723882	100.00	61	0	0	1	61	76884	76944	6e-28	113
SRR492388.154723882	100.00	38	0	0	64	101	98911	98874	4e-15	71.3
SRR492388.153695921	100.00	70	0	0	1	70	107249	107318	6e-33	130
SRR492388.153695921	100.00	30	0	0	72	101	108900	108929	1e-10	56.5
SRR492388.153078972	100.00	56	0	0	1	56	109079	109024	4e-25	104
SRR492388.153078972	100.00	56	0	0	46	101	108354	108409	4e-25	104
SRR492388.152848512	100.00	72	0	0	1	72	96393	96464	5e-34	134
SRR492388.152848512	94.74	38	1	1	64	101	95912	95876	3e-11	58.4
SRR492388.152745791	100.00	74	0	0	1	74	91535	91462	4e-35	137
SRR492388.152745791	100.00	27	0	0	75	101	78670	78696	5e-09	51.0
SRR492388.152702112	100.00	46	0	0	1	46	77869	77914	1e-19	86.1
SRR492388.152702112	93.75	80	4	1	23	101	77879	77958	1e-29	119
SRR492388.152288431	100.00	32	0	0	1	32	110467	110436	8e-12	60.2
SRR492388.152288431	100.00	76	0	0	26	101	128135	128210	3e-36	141
SRR492388.151377861	100.00	46	0	0	1	46	121564	121609	1e-19	86.1
SRR492388.151377861	100.00	55	0	0	47	101	116872	116818	1e-24	102
SRR492388.150854281	100.00	46	0	0	1	46	95147	95192	1e-19	86.1
SRR492388.150854281	100.00	69	0	0	33	101	95107	95039	2e-32	128
SRR492388.149711261	100.00	40	0	0	4	43	97507	97546	3e-16	75.0
SRR492388.149711261	93.62	47	3	0	38	84	97601	97555	4e-15	71.3
SRR492388.149374571	95.52	67	2	1	1	67	23910	23975	1e-25	106
SRR492388.149374571	100.00	51	0	0	51	101	38608	38558	2e-22	95.3
SRR492388.149359461	100.00	68	0	0	1	68	94959	94892	8e-32	126
SRR492388.149359461	94.12	34	2	0	68	101	88369	88336	1e-09	52.8
SRR492388.148856481	98.61	72	1	0	1	72	17786	17715	2e-32	128
SRR492388.148856481	100.00	37	0	0	65	101	17443	17479	1e-14	69.4
SRR492388.148013691	96.05	76	3	0	1	76	54470	54545	3e-31	124
SRR492388.148013691	100.00	40	0	0	62	101	54544	54505	3e-16	75.0
SRR492388.147855552	100.00	31	0	0	1	31	96014	96044	3e-11	58.4
SRR492388.147855552	98.73	79	1	0	23	101	96249	96171	3e-36	141
SRR492388.147547951	100.00	79	0	0	1	79	99310	99232	6e-38	147
SRR492388.147547951	100.00	29	0	0	73	101	97827	97799	4e-10	54.7
SRR492388.146685722	100.00	71	0	0	1	71	105791	105721	2e-33	132
SRR492388.146685722	100.00	35	0	0	67	101	105853	105887	2e-13	65.8
SRR492388.14667601	100.00	20	0	0	1	20	30863	30844	4e-05	38.1
SRR492388.14667601	98.89	90	0	1	12	101	30844	30756	8e-42	159
SRR492388.145853421	100.00	70	0	0	1	70	104365	104434	6e-33	130
SRR492388.145853421	100.00	28	0	0	71	98	71861	71834	1e-09	52.8
SRR492388.145267551	96.67	30	1	0	1	30	58467	58496	5e-09	51.0
SRR492388.145267551	100.00	75	0	0	27	101	58511	58437	1e-35	139
SRR492388.145175431	100.00	62	0	0	1	62	98723	98784	2e-28	115
SRR492388.145175431	100.00	40	0	0	62	101	84920	84959	3e-16	75.0
SRR492388.14478202	98.91	92	0	1	1	91	30929	30838	6e-43	163
SRR492388.14478202	100.00	24	0	0	78	101	30844	30821	2e-07	45.4
SRR492388.144529311	97.37	38	1	0	1	38	112533	112496	2e-13	65.8
SRR492388.144529311	100.00	72	0	0	30	101	112535	112606	5e-34	134
SRR492388.144048242	100.00	32	0	0	1	32	100054	100023	8e-12	60.2
SRR492388.144048242	98.65	74	1	0	28	101	104568	104641	2e-33	132
SRR492388.144026111	100.00	86	0	0	1	86	83269	83184	8e-42	159
SRR492388.144026111	100.00	21	0	0	81	101	30106	30126	1e-05	39.9
SRR492388.143101391	100.00	63	0	0	1	63	100875	100937	5e-29	117
SRR492388.143101391	97.37	38	1	0	64	101	99927	99890	2e-13	65.8
SRR492388.142931401	100.00	30	0	0	1	30	77885	77914	1e-10	56.5
SRR492388.142931401	94.79	96	4	1	7	101	77879	77974	2e-38	148
SRR492388.142557652	100.00	75	0	0	1	75	63615	63541	1e-35	139
SRR492388.142557652	100.00	31	0	0	71	101	114801	114771	3e-11	58.4
SRR492388.142365372	93.90	82	4	1	1	81	77960	77879	1e-30	122
SRR492388.142365372	100.00	44	0	0	58	101	77914	77871	2e-18	82.4
SRR492388.142038242	94.79	96	4	1	1	95	77974	77879	2e-38	148
SRR492388.142038242	100.00	30	0	0	72	101	77914	77885	1e-10	56.5
SRR492388.141975331	100.00	28	0	0	1	28	95092	95065	1e-09	52.8
SRR492388.141975331	100.00	77	0	0	25	101	95013	95089	8e-37	143
SRR492388.141727751	100.00	35	0	0	1	35	76958	76992	2e-13	65.8
SRR492388.141727751	97.44	78	1	1	24	101	76956	76880	2e-33	132
SRR492388.141639972	100.00	26	0	0	1	26	84490	84465	2e-08	49.1
SRR492388.141639972	100.00	76	0	0	26	101	84931	85006	3e-36	141
SRR492388.141310452	100.00	68	0	0	1	68	95278	95345	8e-32	126
SRR492388.141310452	100.00	31	0	0	71	101	64144	64114	3e-11	58.4
SRR492388.139698842	94.81	77	2	2	1	76	20826	20751	1e-29	119
SRR492388.139698842	92.31	26	2	0	70	95	8511	8486	4e-05	38.1
SRR492388.13940922	100.00	76	0	0	1	76	95421	95346	3e-36	141
SRR492388.13940922	100.00	27	0	0	75	101	105623	105597	5e-09	51.0
SRR492388.13920341	100.00	36	0	0	1	36	10225	10190	5e-14	67.6
SRR492388.13920341	100.00	70	0	0	32	101	91726	91657	6e-33	130
SRR492388.13878021	100.00	30	0	0	1	30	102908	102879	1e-10	56.5
SRR492388.13878021	100.00	71	0	0	31	101	103330	103400	2e-33	132
SRR492388.138245282	100.00	21	0	0	1	21	77745	77725	1e-05	39.9
SRR492388.138245282	91.86	86	7	0	16	101	77718	77633	4e-30	121
SRR492388.137932491	100.00	79	0	0	1	79	31095	31017	6e-38	147
SRR492388.137932491	96.55	29	1	0	70	98	66715	66687	2e-08	49.1
SRR492388.137713131	100.00	47	0	0	1	47	105723	105677	4e-20	87.9
SRR492388.137713131	100.00	56	0	0	46	101	33483	33538	4e-25	104
SRR492388.137322871	100.00	66	0	0	1	66	48387	48452	1e-30	122
SRR492388.137322871	97.83	46	0	1	56	101	4398	4442	2e-17	78.7
SRR492388.136998261	93.75	48	3	0	1	48	112455	112408	1e-15	73.1
SRR492388.136998261	100.00	70	0	0	32	101	112408	112477	6e-33	130
SRR492388.136437241	100.00	46	0	0	1	46	77869	77914	1e-19	86.1
SRR492388.136437241	93.75	80	4	1	23	101	77879	77958	1e-29	119
SRR492388.136314571	100.00	25	0	0	1	25	90896	90920	6e-08	47.3
SRR492388.136314571	100.00	79	0	0	22	100	90946	90868	6e-38	147
SRR492388.136180001	97.37	38	1	0	1	38	112533	112496	2e-13	65.8
SRR492388.136180001	100.00	72	0	0	30	101	112535	112606	5e-34	134
SRR492388.134807661	100.00	23	0	0	1	23	10641	10619	8e-07	43.6
SRR492388.134807661	100.00	23	0	0	79	101	100980	101002	8e-07	43.6
SRR492388.133776511	96.00	25	1	0	1	25	688	664	3e-06	41.7
SRR492388.133776511	97.92	48	1	0	26	73	654	607	5e-19	84.2
SRR492388.133232432	100.00	65	0	0	1	65	109124	109060	4e-30	121
SRR492388.133232432	100.00	54	0	0	48	101	102808	102861	5e-24	100
SRR492388.133160791	96.77	31	1	0	1	31	55836	55866	1e-09	52.8
SRR492388.133160791	100.00	80	0	0	22	101	50984	51063	2e-38	148
SRR492388.133118641	100.00	51	0	0	1	51	95760	95810	2e-22	95.3
SRR492388.133118641	100.00	51	0	0	51	101	83776	83726	2e-22	95.3
SRR492388.133106452	97.06	34	0	1	1	33	113300	113333	1e-10	56.5
SRR492388.133106452	100.00	78	0	0	24	101	82455	82532	2e-37	145
SRR492388.131944361	100.00	73	0	0	1	73	103696	103768	1e-34	135
SRR492388.131944361	100.00	31	0	0	71	101	104219	104189	3e-11	58.4
SRR492388.128251881	100.00	76	0	0	1	76	31092	31017	3e-36	141
SRR492388.128251881	96.55	29	1	0	66	94	66715	66687	2e-08	49.1
SRR492388.128136542	100.00	84	0	0	1	84	30946	31029	1e-40	156
SRR492388.128136542	100.00	24	0	0	78	101	31017	31040	2e-07	45.4
SRR492388.126557172	100.00	36	0	0	1	36	92335	92370	5e-14	67.6
SRR492388.126557172	100.00	72	0	0	30	101	92536	92465	5e-34	134
SRR492388.126506192	100.00	69	0	0	1	69	85652	85720	2e-32	128
SRR492388.126506192	100.00	34	0	0	68	101	90427	90460	6e-13	63.9
SRR492388.126482952	100.00	72	0	0	1	72	84999	85070	5e-34	134
SRR492388.126482952	100.00	29	0	0	73	101	42064	42036	4e-10	54.7
SRR492388.125965071	100.00	69	0	0	1	69	66959	67027	2e-32	128
SRR492388.125965071	100.00	30	0	0	72	101	46257	46286	1e-10	56.5
SRR492388.125938741	100.00	72	0	0	1	72	101869	101798	5e-34	134
SRR492388.125938741	100.00	27	0	0	75	101	56486	56512	5e-09	51.0
SRR492388.125908221	100.00	70	0	0	1	70	31086	31017	6e-33	130
SRR492388.125908221	90.00	30	3	0	60	89	66715	66686	1e-05	39.9
SRR492388.125049782	100.00	62	0	0	1	62	31078	31017	2e-28	115
SRR492388.125049782	90.00	30	3	0	52	81	66715	66686	1e-05	39.9
SRR492388.124959051	100.00	33	0	0	3	35	97160	97128	2e-12	62.1
SRR492388.124959051	100.00	73	0	0	29	101	97115	97187	1e-34	135
SRR492388.124919752	94.57	92	1	4	1	89	30927	30837	1e-35	139
SRR492388.124919752	100.00	24	0	0	78	101	30842	30819	2e-07	45.4
SRR492388.124720762	100.00	73	0	0	1	73	55437	55365	1e-34	135
SRR492388.124720762	100.00	27	0	0	74	100	105957	105983	5e-09	51.0
SRR492388.124427041	100.00	75	0	0	1	75	98580	98654	1e-35	139
SRR492388.124427041	100.00	24	0	0	78	101	105405	105428	2e-07	45.4
SRR492388.12386581	100.00	74	0	0	1	74	74684	74757	4e-35	137
SRR492388.12386581	100.00	30	0	0	72	101	24159	24130	1e-10	56.5
SRR492388.123197131	100.00	21	0	0	1	21	30864	30844	1e-05	39.9
SRR492388.123197131	97.75	89	1	1	13	101	30844	30757	1e-39	152
SRR492388.122562282	100.00	81	0	0	1	81	30949	31029	5e-39	150
SRR492388.122562282	100.00	27	0	0	75	101	31017	31043	5e-09	51.0
SRR492388.12242271	100.00	44	0	0	1	44	99179	99136	2e-18	82.4
SRR492388.12242271	100.00	56	0	0	46	101	118490	118435	4e-25	104
SRR492388.122313032	98.86	88	0	1	1	87	30925	30838	1e-40	156
SRR492388.122313032	100.00	28	0	0	74	101	30844	30817	1e-09	52.8
SRR492388.121666952	100.00	38	0	0	1	38	84208	84171	4e-15	71.3
SRR492388.121666952	100.00	63	0	0	39	101	1	63	5e-29	117
SRR492388.121637381	100.00	42	0	0	1	42	105318	105277	2e-17	78.7
SRR492388.121637381	100.00	70	0	0	32	101	106591	106522	6e-33	130
SRR492388.121423131	97.96	49	1	0	1	49	95446	95398	1e-19	86.1
SRR492388.121423131	89.89	89	4	5	15	101	95413	95498	8e-27	110
SRR492388.121105301	97.67	43	1	0	2	44	27662	27704	3e-16	75.0
SRR492388.121105301	94.34	53	3	0	49	101	69423	69475	2e-18	82.4
SRR492388.120811871	96.43	28	1	0	1	28	123898	123925	6e-08	47.3
SRR492388.120811871	100.00	78	0	0	24	101	123936	123859	2e-37	145
SRR492388.120323111	93.18	44	3	0	1	44	109411	109368	2e-13	65.8
SRR492388.120323111	98.77	81	0	1	22	101	109319	109399	8e-37	143
SRR492388.120311922	100.00	72	0	0	1	72	102367	102438	5e-34	134
SRR492388.120311922	100.00	29	0	0	73	101	109758	109730	4e-10	54.7
SRR492388.120292992	100.00	80	0	0	1	80	30950	31029	2e-38	148
SRR492388.120292992	100.00	27	0	0	74	100	31017	31043	5e-09	51.0
SRR492388.120170252	100.00	86	0	0	1	86	126687	126602	8e-42	159
SRR492388.120170252	100.00	23	0	0	79	101	46781	46803	8e-07	43.6
SRR492388.120021762	100.00	49	0	0	1	49	114561	114609	3e-21	91.6
SRR492388.120021762	100.00	51	0	0	51	101	11781	11831	2e-22	95.3
SRR492388.119821141	98.89	90	0	1	1	89	30927	30838	8e-42	159
SRR492388.119821141	100.00	26	0	0	76	101	30844	30819	2e-08	49.1
SRR492388.119660751	98.73	79	1	0	1	79	97906	97828	3e-36	141
SRR492388.119660751	100.00	25	0	0	77	101	27273	27249	6e-08	47.3
SRR492388.119660741	100.00	79	0	0	1	79	97906	97828	6e-38	147
SRR492388.119660741	100.00	25	0	0	77	101	27273	27249	6e-08	47.3
SRR492388.119559612	100.00	72	0	0	1	72	89730	89801	5e-34	134
SRR492388.119559612	100.00	29	0	0	73	101	55750	55778	4e-10	54.7
SRR492388.118452371	100.00	77	0	0	1	77	97400	97324	8e-37	143
SRR492388.118452371	100.00	31	0	0	71	101	81476	81446	3e-11	58.4
SRR492388.117281552	100.00	58	0	0	1	58	568	511	3e-26	108
SRR492388.117281552	100.00	42	0	0	60	101	78813	78854	2e-17	78.7
SRR492388.11719921	100.00	32	0	0	1	32	498	467	8e-12	60.2
SRR492388.11719921	100.00	69	0	0	33	101	83849	83781	2e-32	128
SRR492388.115583972	100.00	38	0	0	1	38	108278	108241	4e-15	71.3
SRR492388.115583972	100.00	65	0	0	37	101	105752	105688	4e-30	121
SRR492388.115372032	100.00	76	0	0	1	76	67111	67036	3e-36	141
SRR492388.115372032	100.00	21	0	0	81	101	94555	94535	1e-05	39.9
SRR492388.115337922	97.78	90	1	1	1	89	30927	30838	4e-40	154
SRR492388.115337922	100.00	21	0	0	81	101	30839	30819	1e-05	39.9
SRR492388.114781752	100.00	43	0	0	1	43	107370	107412	6e-18	80.5
SRR492388.114781752	96.67	60	2	0	42	101	107399	107458	5e-24	100
SRR492388.113899882	100.00	48	0	0	1	48	77867	77914	1e-20	89.8
SRR492388.113899882	92.31	78	5	1	25	101	77879	77956	8e-27	110
SRR492388.113484082	98.41	63	1	0	1	63	77852	77914	2e-27	111
SRR492388.113484082	100.00	30	0	0	72	101	77912	77941	1e-10	56.5
SRR492388.113440212	100.00	25	0	0	1	25	90354	90378	6e-08	47.3
SRR492388.113440212	97.67	86	1	1	17	101	90333	90248	6e-38	147
SRR492388.113371752	97.80	91	1	1	1	90	30928	30838	1e-40	156
SRR492388.113371752	100.00	25	0	0	77	101	30844	30820	6e-08	47.3
SRR492388.113073582	100.00	30	0	0	1	30	77885	77914	1e-10	56.5
SRR492388.113073582	93.75	96	5	1	7	101	77879	77974	8e-37	143
SRR492388.112970901	97.50	40	1	0	1	40	78965	79004	1e-14	69.4
SRR492388.112970901	98.57	70	1	0	32	101	79069	79000	3e-31	124
SRR492388.112919721	100.00	68	0	0	1	68	85030	85097	8e-32	126
SRR492388.112919721	100.00	32	0	0	70	101	62069	62100	8e-12	60.2
SRR492388.112407161	100.00	44	0	0	1	44	77871	77914	2e-18	82.4
SRR492388.112407161	93.90	82	4	1	21	101	77879	77960	1e-30	122
SRR492388.112083981	100.00	79	0	0	1	79	54810	54888	6e-38	147
SRR492388.112083981	100.00	23	0	0	79	101	10482	10504	8e-07	43.6
SRR492388.111939592	98.89	90	0	1	1	89	30927	30838	8e-42	159
SRR492388.111939592	100.00	26	0	0	76	101	30844	30819	2e-08	49.1
SRR492388.110413982	100.00	43	0	0	1	43	105668	105710	6e-18	80.5
SRR492388.110413982	92.59	54	4	0	46	99	105961	106014	2e-17	78.7
SRR492388.108538122	100.00	64	0	0	1	64	110544	110607	1e-29	119
SRR492388.108538122	100.00	36	0	0	66	101	84633	84598	5e-14	67.6
SRR492388.107996032	100.00	55	0	0	1	55	91767	91713	1e-24	102
SRR492388.107996032	100.00	44	0	0	58	101	70655	70698	2e-18	82.4
SRR492388.107821851	100.00	75	0	0	1	75	64537	64611	1e-35	139
SRR492388.107821851	100.00	33	0	0	69	101	41579	41547	2e-12	62.1
SRR492388.107544101	98.18	55	1	0	1	55	117716	117662	6e-23	97.1
SRR492388.107544101	100.00	55	0	0	47	101	117630	117684	1e-24	102
SRR492388.107231051	100.00	54	0	0	1	54	100955	100902	5e-24	100
SRR492388.107231051	96.30	54	1	1	49	101	58131	58078	4e-20	87.9
SRR492388.107191332	100.00	70	0	0	1	70	95762	95693	6e-33	130
SRR492388.107191332	100.00	29	0	0	73	101	102327	102355	4e-10	54.7
SRR492388.106901441	100.00	91	0	0	1	91	65095	65185	1e-44	169
SRR492388.106901441	100.00	21	0	0	81	101	99221	99241	1e-05	39.9
SRR492388.106594591	100.00	72	0	0	1	72	65886	65815	5e-34	134
SRR492388.106594591	100.00	31	0	0	71	101	106740	106710	3e-11	58.4
SRR492388.106249682	100.00	51	0	0	1	51	28076	28126	2e-22	95.3
SRR492388.106249682	100.00	50	0	0	52	101	63126	63077	8e-22	93.5
SRR492388.105297621	98.89	90	0	1	1	89	30927	30838	8e-42	159
SRR492388.105297621	100.00	26	0	0	76	101	30844	30819	2e-08	49.1
SRR492388.105237612	100.00	58	0	0	1	58	26101	26158	3e-26	108
SRR492388.105237612	100.00	39	0	0	60	98	4244	4282	1e-15	73.1
SRR492388.105228022	100.00	66	0	0	1	66	125188	125253	1e-30	122
SRR492388.105228022	95.74	47	1	1	56	101	24594	24640	3e-16	75.0
SRR492388.105228021	97.33	75	1	1	1	74	24668	24594	8e-32	126
SRR492388.105228021	100.00	38	0	0	64	101	125253	125216	4e-15	71.3
SRR492388.103467742	100.00	25	0	0	1	25	45696	45720	6e-08	47.3
SRR492388.103467742	97.70	87	2	0	15	101	47048	47134	5e-39	150
SRR492388.10206311	98.44	64	1	0	1	64	27882	27945	6e-28	113
SRR492388.10206311	100.00	41	0	0	61	101	27926	27966	8e-17	76.8
SRR492388.101657732	100.00	62	0	0	1	62	11105	11044	2e-28	115
SRR492388.101657732	100.00	38	0	0	64	101	126676	126713	4e-15	71.3
SRR492388.101326661	100.00	29	0	0	1	29	14763	14791	4e-10	54.7
SRR492388.101326661	100.00	78	0	0	24	101	14807	14730	2e-37	145
SRR492388.101245531	100.00	22	0	0	1	22	30865	30844	3e-06	41.7
SRR492388.101245531	96.47	85	3	0	14	98	30844	30760	3e-36	141
SRR492388.100966062	98.28	58	0	1	1	58	94271	94327	5e-24	100
SRR492388.100966062	100.00	51	0	0	51	101	86488	86438	2e-22	95.3
SRR492388.100813992	100.00	73	0	0	1	73	86099	86027	1e-34	135
SRR492388.100813992	100.00	26	0	0	76	101	101734	101759	2e-08	49.1
SRR492388.10069121	100.00	29	0	0	1	29	104001	103973	4e-10	54.7
SRR492388.10069121	100.00	72	0	0	30	101	103960	103889	5e-34	134

## Sheet: WS-2
Read Identifiant	Match %	Aligned bases	Mismatches	Gap Openings	Start Pos. Read	Stop Pos. Read	Start Pos. Genome	Stop Pos. Genome	Expect Value	Bit Score
SRR492407.100091991	100.00	71	0	0	1	71	47008	46938	2e-33	132
SRR492407.100091991	100.00	28	0	0	74	101	100945	100972	1e-09	52.8
SRR492407.10020992	100.00	65	0	0	1	65	93386	93450	4e-30	121
SRR492407.10020992	100.00	35	0	0	67	101	122290	122256	2e-13	65.8
SRR492407.10079331	100.00	49	0	0	1	49	75318	75366	3e-21	91.6
SRR492407.10079331	98.33	60	1	0	42	101	75491	75432	1e-25	106
SRR492407.101042401	100.00	29	0	0	1	29	25882	25854	4e-10	54.7
SRR492407.101042401	98.63	73	0	1	28	100	72957	73028	2e-32	128
SRR492407.101452932	100.00	34	0	0	1	34	4388	4355	6e-13	63.9
SRR492407.101452932	100.00	73	0	0	29	101	4204	4276	1e-34	135
SRR492407.101714741	100.00	42	0	0	1	42	93705	93746	2e-17	78.7
SRR492407.101714741	85.00	40	2	4	14	53	42002	41967	4e-05	38.1
SRR492407.101895621	100.00	59	0	0	1	59	47146	47088	8e-27	110
SRR492407.101895621	100.00	47	0	0	55	101	93656	93610	4e-20	87.9
SRR492407.101923272	100.00	67	0	0	1	67	93676	93742	3e-31	124
SRR492407.101923272	86.49	37	2	3	43	77	42002	41967	4e-05	38.1
SRR492407.102200371	98.95	95	0	1	1	95	47221	47314	1e-44	169
SRR492407.102200371	90.00	30	1	2	72	101	8753	8726	4e-05	38.1
SRR492407.102363051	100.00	30	0	0	1	30	109228	109257	1e-10	56.5
SRR492407.102363051	100.00	78	0	0	24	101	109273	109350	2e-37	145
SRR492407.103998391	100.00	62	0	0	1	62	16548	16609	2e-28	115
SRR492407.103998391	100.00	38	0	0	64	101	44453	44490	4e-15	71.3
SRR492407.104137092	100.00	63	0	0	1	63	25916	25854	5e-29	117
SRR492407.104137092	100.00	40	0	0	62	101	72957	72996	3e-16	75.0
SRR492407.10416951	100.00	35	0	0	1	35	108058	108024	2e-13	65.8
SRR492407.10416951	100.00	64	0	0	38	101	104526	104463	1e-29	119
SRR492407.105819522	100.00	81	0	0	1	81	104733	104813	5e-39	150
SRR492407.105819522	100.00	20	0	0	82	101	16818	16799	4e-05	38.1
SRR492407.106091252	100.00	45	0	0	1	45	108224	108268	5e-19	84.2
SRR492407.106091252	98.36	61	0	1	42	101	108157	108097	1e-25	106
SRR492407.106261502	100.00	73	0	0	1	73	86682	86754	1e-34	135
SRR492407.106261502	100.00	31	0	0	71	101	87281	87251	3e-11	58.4
SRR492407.107232191	100.00	25	0	0	1	25	63401	63377	6e-08	47.3
SRR492407.107232191	100.00	78	0	0	24	101	63364	63441	2e-37	145
SRR492407.107430761	100.00	69	0	0	1	69	96721	96789	2e-32	128
SRR492407.107430761	94.12	34	2	0	67	100	96766	96799	1e-09	52.8
SRR492407.107505682	100.00	33	0	0	1	33	9707	9675	2e-12	62.1
SRR492407.107505682	96.97	66	2	0	36	101	9688	9623	2e-27	111
SRR492407.108251911	86.42	81	2	5	1	72	612	692	6e-18	80.5
SRR492407.108251911	93.33	30	2	0	72	101	702	731	2e-07	45.4
SRR492407.108251912	96.67	60	2	0	1	60	761	702	5e-24	100
SRR492407.108251912	96.00	25	1	0	64	88	688	664	3e-06	41.7
SRR492407.108485561	100.00	81	0	0	1	81	45126	45206	5e-39	150
SRR492407.108485561	100.00	25	0	0	77	101	45196	45220	6e-08	47.3
SRR492407.109250681	100.00	52	0	0	1	52	30960	30909	6e-23	97.1
SRR492407.109250681	98.08	52	1	0	49	100	30803	30854	3e-21	91.6
SRR492407.109280342	100.00	43	0	0	1	43	94609	94567	6e-18	80.5
SRR492407.109280342	98.51	67	1	0	35	101	94621	94687	1e-29	119
SRR492407.109612091	100.00	65	0	0	1	65	100909	100845	4e-30	121
SRR492407.109612091	100.00	35	0	0	66	100	86266	86300	2e-13	65.8
SRR492407.110047612	100.00	72	0	0	1	72	105806	105877	5e-34	134
SRR492407.110047612	97.44	39	1	0	63	101	105840	105878	5e-14	67.6
SRR492407.110108002	100.00	47	0	0	1	47	115840	115886	4e-20	87.9
SRR492407.110108002	100.00	53	0	0	49	101	93090	93142	2e-23	99.0
SRR492407.110122141	100.00	37	0	0	1	37	127503	127467	1e-14	69.4
SRR492407.110122141	100.00	72	0	0	30	101	127443	127372	5e-34	134
SRR492407.111451921	100.00	66	0	0	1	66	101010	101075	1e-30	122
SRR492407.111451921	100.00	33	0	0	69	101	55175	55207	2e-12	62.1
SRR492407.112009592	100.00	68	0	0	1	68	15518	15451	8e-32	126
SRR492407.112009592	100.00	33	0	0	69	101	108764	108732	2e-12	62.1
SRR492407.112077112	100.00	59	0	0	1	59	93303	93361	8e-27	110
SRR492407.112077112	100.00	40	0	0	62	101	103906	103945	3e-16	75.0
SRR492407.112104902	100.00	62	0	0	1	62	86903	86842	2e-28	115
SRR492407.112104902	100.00	37	0	0	65	101	19016	18980	1e-14	69.4
SRR492407.112746421	100.00	74	0	0	1	74	42252	42325	4e-35	137
SRR492407.112746421	100.00	29	0	0	73	101	52450	52422	4e-10	54.7
SRR492407.113232481	94.12	34	1	1	1	34	108706	108674	5e-09	51.0
SRR492407.113232481	100.00	79	0	0	23	101	57572	57494	6e-38	147
SRR492407.113533961	100.00	35	0	0	1	35	105528	105494	2e-13	65.8
SRR492407.113533961	98.65	74	1	0	28	101	74347	74274	2e-33	132
SRR492407.1136352	100.00	57	0	0	1	57	92924	92980	1e-25	106
SRR492407.1136352	100.00	42	0	0	60	101	55564	55605	2e-17	78.7
SRR492407.114617921	98.81	84	1	0	1	84	39712	39795	5e-39	150
SRR492407.114617921	95.65	46	2	0	56	101	37552	37597	3e-16	75.0
SRR492407.115140671	100.00	34	0	0	1	34	93200	93233	6e-13	63.9
SRR492407.115140671	100.00	68	0	0	34	101	88984	89051	8e-32	126
SRR492407.115233121	100.00	81	0	0	1	81	99524	99604	5e-39	150
SRR492407.115233121	100.00	20	0	0	82	101	99624	99605	4e-05	38.1
SRR492407.115647131	98.41	63	1	0	1	63	24433	24495	2e-27	111
SRR492407.115647131	100.00	45	0	0	57	101	24398	24354	5e-19	84.2
SRR492407.115939772	100.00	56	0	0	1	56	26055	26110	4e-25	104
SRR492407.115939772	98.21	56	1	0	46	101	26054	25999	2e-23	99.0
SRR492407.11596882	100.00	77	0	0	1	77	100846	100770	8e-37	143
SRR492407.11596882	100.00	22	0	0	80	101	86565	86544	3e-06	41.7
SRR492407.116438272	100.00	71	0	0	1	71	120870	120940	2e-33	132
SRR492407.116438272	100.00	29	0	0	73	101	91328	91300	4e-10	54.7
SRR492407.11728551	96.00	25	1	0	4	28	688	664	3e-06	41.7
SRR492407.11728551	87.84	74	7	2	29	101	654	582	1e-19	86.1
SRR492407.118253602	100.00	76	0	0	1	76	99460	99535	3e-36	141
SRR492407.118253602	97.22	36	1	0	66	101	112319	112354	2e-12	62.1
SRR492407.118357791	100.00	45	0	0	1	45	64539	64495	5e-19	84.2
SRR492407.118357791	100.00	64	0	0	38	101	55387	55450	1e-29	119
SRR492407.118441921	98.55	69	1	0	1	69	60419	60351	1e-30	122
SRR492407.118441921	100.00	27	0	0	75	101	60329	60303	5e-09	51.0
SRR492407.118679662	100.00	53	0	0	1	53	73009	72957	2e-23	99.0
SRR492407.118679662	100.00	50	0	0	52	101	25854	25903	8e-22	93.5
SRR492407.118708821	98.68	76	1	0	1	76	121204	121129	1e-34	135
SRR492407.118708821	100.00	28	0	0	74	101	121083	121110	1e-09	52.8
SRR492407.118708822	100.00	29	0	0	1	29	121111	121083	4e-10	54.7
SRR492407.118708822	98.67	75	1	0	27	101	121129	121203	5e-34	134
SRR492407.11959111	94.74	38	1	1	1	38	72997	73033	3e-11	58.4
SRR492407.11959111	98.73	79	0	1	24	101	58152	58230	1e-35	139
SRR492407.119710312	100.00	39	0	0	1	39	110163	110125	1e-15	73.1
SRR492407.119710312	100.00	62	0	0	40	101	84662	84601	2e-28	115
SRR492407.119752132	100.00	66	0	0	1	66	62310	62375	1e-30	122
SRR492407.119752132	95.24	42	1	1	56	97	20133	20093	2e-13	65.8
SRR492407.119790811	100.00	41	0	0	1	41	105101	105141	8e-17	76.8
SRR492407.119790811	98.31	59	1	0	39	97	102016	102074	4e-25	104
SRR492407.120125162	100.00	66	0	0	1	66	58044	58109	1e-30	122
SRR492407.120125162	100.00	36	0	0	66	101	12562	12597	5e-14	67.6
SRR492407.121107531	100.00	36	0	0	1	36	92338	92373	5e-14	67.6
SRR492407.121107531	100.00	70	0	0	32	101	92398	92329	6e-33	130
SRR492407.121388441	100.00	92	0	0	1	92	9597	9688	4e-45	171
SRR492407.121388441	88.24	34	3	1	66	99	8088	8120	1e-05	39.9
SRR492407.121897681	100.00	47	0	0	1	47	17032	16986	4e-20	87.9
SRR492407.121897681	100.00	58	0	0	44	101	25936	25879	3e-26	108
SRR492407.121897682	98.77	81	0	1	1	80	58232	58152	8e-37	143
SRR492407.121897682	94.44	36	1	1	66	101	73033	72999	4e-10	54.7
SRR492407.12271412	100.00	41	0	0	1	41	96888	96928	8e-17	76.8
SRR492407.12271412	100.00	65	0	0	37	101	96839	96775	4e-30	121
SRR492407.122827032	100.00	84	0	0	1	84	41235	41152	1e-40	156
SRR492407.122827032	97.30	37	0	1	66	101	24212	24176	2e-12	62.1
SRR492407.12298111	100.00	83	0	0	1	83	45278	45196	4e-40	154
SRR492407.12298111	100.00	23	0	0	79	101	45206	45184	8e-07	43.6
SRR492407.123508201	100.00	58	0	0	1	58	27345	27288	3e-26	108
SRR492407.123508201	100.00	44	0	0	58	101	79440	79483	2e-18	82.4
SRR492407.124913701	100.00	54	0	0	1	54	5806	5859	5e-24	100
SRR492407.124913701	100.00	45	0	0	57	101	24048	24092	5e-19	84.2
SRR492407.125555301	100.00	47	0	0	1	47	103269	103315	4e-20	87.9
SRR492407.125555301	100.00	68	0	0	34	101	104928	104995	8e-32	126
SRR492407.125728982	90.14	71	3	3	1	69	47629	47697	1e-20	89.8
SRR492407.125728982	100.00	54	0	0	48	101	85275	85222	5e-24	100
SRR492407.125876011	100.00	48	0	0	1	48	70927	70974	1e-20	89.8
SRR492407.125876011	98.00	50	1	0	50	99	66971	67020	4e-20	87.9
SRR492407.125925321	100.00	66	0	0	1	66	97732	97797	1e-30	122
SRR492407.125925321	100.00	40	0	0	62	101	97964	97925	3e-16	75.0
SRR492407.126066522	100.00	48	0	0	1	48	58507	58460	1e-20	89.8
SRR492407.126066522	100.00	53	0	0	49	101	96352	96300	2e-23	99.0
SRR492407.126518781	100.00	65	0	0	1	65	105256	105320	4e-30	121
SRR492407.126518781	100.00	34	0	0	68	101	117119	117086	6e-13	63.9
SRR492407.127301362	100.00	54	0	0	1	54	103269	103216	5e-24	100
SRR492407.127301362	98.46	65	1	0	37	101	104110	104046	2e-28	115
SRR492407.12741092	92.31	52	4	0	1	52	87033	87084	3e-16	75.0
SRR492407.12741092	90.00	30	3	0	70	99	87897	87926	1e-05	39.9
SRR492407.127532052	100.00	43	0	0	1	43	71278	71236	6e-18	80.5
SRR492407.127532052	98.53	68	0	1	34	101	99180	99114	1e-29	119
SRR492407.128245012	100.00	60	0	0	1	60	67585	67644	2e-27	111
SRR492407.128245012	94.12	51	3	0	51	101	101638	101588	2e-17	78.7
SRR492407.12827331	100.00	53	0	0	1	53	43725	43777	2e-23	99.0
SRR492407.12827331	94.44	54	1	2	48	101	63259	63310	2e-18	82.4
SRR492407.130070042	100.00	40	0	0	1	40	107296	107335	3e-16	75.0
SRR492407.130070042	100.00	67	0	0	35	101	107269	107203	3e-31	124
SRR492407.130187561	100.00	84	0	0	1	84	88040	87957	1e-40	156
SRR492407.130187561	100.00	22	0	0	80	101	97493	97514	3e-06	41.7
SRR492407.130187562	100.00	42	0	0	1	42	97534	97493	2e-17	78.7
SRR492407.130187562	100.00	64	0	0	38	101	87957	88020	1e-29	119
SRR492407.130463431	100.00	37	0	0	1	37	22756	22792	1e-14	69.4
SRR492407.130463431	93.75	64	4	0	38	101	38439	38502	6e-23	97.1
SRR492407.130617121	100.00	40	0	0	1	40	13422	13461	3e-16	75.0
SRR492407.130617121	100.00	66	0	0	36	101	110189	110254	1e-30	122
SRR492407.130784702	100.00	45	0	0	1	45	58956	58912	5e-19	84.2
SRR492407.130784702	100.00	58	0	0	44	101	58709	58766	3e-26	108
SRR492407.131117021	97.53	81	0	1	1	81	63159	63081	4e-35	137
SRR492407.131117021	100.00	25	0	0	77	101	73758	73734	6e-08	47.3
SRR492407.13119762	100.00	23	0	0	3	25	54725	54703	8e-07	43.6
SRR492407.13119762	100.00	26	0	0	70	95	54652	54627	2e-08	49.1
SRR492407.131238521	96.00	25	1	0	4	28	688	664	3e-06	41.7
SRR492407.131238521	90.32	62	4	2	29	90	654	595	6e-18	80.5
SRR492407.131263001	100.00	32	0	0	2	33	28268	28299	8e-12	60.2
SRR492407.131263001	100.00	70	0	0	32	101	28314	28245	6e-33	130
SRR492407.131577252	100.00	70	0	0	1	70	75225	75156	6e-33	130
SRR492407.131577252	100.00	30	0	0	72	101	21235	21264	1e-10	56.5
SRR492407.131813942	100.00	66	0	0	1	66	117916	117981	1e-30	122
SRR492407.131813942	100.00	35	0	0	67	101	117410	117444	2e-13	65.8
SRR492407.132256421	100.00	33	0	0	1	33	104559	104527	2e-12	62.1
SRR492407.132256421	95.52	67	2	1	18	84	104772	104837	1e-25	106
SRR492407.132256422	96.77	62	2	0	1	62	104833	104772	4e-25	104
SRR492407.132256422	100.00	34	0	0	47	80	104527	104560	6e-13	63.9
SRR492407.132807551	100.00	55	0	0	1	55	120211	120265	1e-24	102
SRR492407.132807551	100.00	45	0	0	57	101	86064	86020	5e-19	84.2
SRR492407.132900041	92.68	41	3	0	1	41	87044	87084	8e-12	60.2
SRR492407.132900041	88.10	42	5	0	59	100	87897	87938	5e-09	51.0
SRR492407.133070551	100.00	43	0	0	1	43	49165	49207	6e-18	80.5
SRR492407.133070551	100.00	56	0	0	46	101	93588	93533	4e-25	104
SRR492407.133604711	100.00	28	0	0	1	28	96981	97008	1e-09	52.8
SRR492407.133604711	100.00	78	0	0	24	101	97025	96948	2e-37	145
SRR492407.134034161	100.00	27	0	0	1	27	199	173	5e-09	51.0
SRR492407.134034161	95.65	69	3	0	30	98	180	112	2e-27	111
SRR492407.134566732	100.00	74	0	0	1	74	92382	92455	4e-35	137
SRR492407.134566732	100.00	25	0	0	77	101	79294	79318	6e-08	47.3
SRR492407.136387321	100.00	46	0	0	1	46	101900	101945	1e-19	86.1
SRR492407.136387321	98.25	57	0	1	46	101	72305	72249	2e-23	99.0
SRR492407.136667871	100.00	80	0	0	1	80	106660	106581	2e-38	148
SRR492407.136667871	100.00	32	0	0	70	101	105287	105256	8e-12	60.2
SRR492407.136754122	100.00	28	0	0	1	28	92873	92846	1e-09	52.8
SRR492407.136754122	95.65	92	2	2	12	101	90325	90416	6e-38	147
SRR492407.137457151	98.25	57	1	0	1	57	59734	59678	5e-24	100
SRR492407.137457151	100.00	56	0	0	46	101	59631	59686	4e-25	104
SRR492407.137503872	100.00	20	0	0	1	20	77744	77725	4e-05	38.1
SRR492407.137503872	94.25	87	5	0	15	101	77718	77632	5e-34	134
SRR492407.137567281	100.00	42	0	0	1	42	99304	99345	2e-17	78.7
SRR492407.137567281	98.31	59	1	0	43	101	67571	67629	4e-25	104
SRR492407.138259701	100.00	67	0	0	1	67	68700	68766	3e-31	124
SRR492407.138259701	94.87	39	2	0	63	101	69011	68973	2e-12	62.1
SRR492407.138664261	100.00	25	0	0	1	25	45220	45196	6e-08	47.3
SRR492407.138664261	97.56	82	1	1	21	101	45206	45125	1e-35	139
SRR492407.138903472	100.00	66	0	0	1	66	117816	117881	1e-30	122
SRR492407.138903472	100.00	33	0	0	69	101	107332	107300	2e-12	62.1
SRR492407.139602431	100.00	58	0	0	1	58	97876	97819	3e-26	108
SRR492407.139602431	95.56	45	2	0	57	101	96818	96774	1e-15	73.1
SRR492407.139791931	100.00	77	0	0	1	77	64541	64617	8e-37	143
SRR492407.139791931	96.00	25	1	0	77	101	124694	124670	3e-06	41.7
SRR492407.140310252	98.88	89	0	1	1	88	50940	50852	3e-41	158
SRR492407.140310252	100.00	21	0	0	81	101	50853	50833	1e-05	39.9
SRR492407.14043861	100.00	29	0	0	4	32	85641	85613	4e-10	54.7
SRR492407.14043861	100.00	74	0	0	28	101	85599	85672	4e-35	137
SRR492407.141220511	94.74	38	1	1	1	37	85310	85273	3e-11	58.4
SRR492407.141220511	100.00	71	0	0	31	101	85256	85326	2e-33	132
SRR492407.141794472	100.00	47	0	0	1	47	43553	43599	4e-20	87.9
SRR492407.141794472	96.77	62	2	0	40	101	43550	43489	4e-25	104
SRR492407.145653171	100.00	31	0	0	1	31	91386	91416	3e-11	58.4
SRR492407.145653171	100.00	72	0	0	30	101	91349	91278	5e-34	134
SRR492407.146060171	100.00	30	0	0	1	30	21656	21627	1e-10	56.5
SRR492407.146060171	100.00	79	0	0	23	101	92117	92195	6e-38	147
SRR492407.146727251	100.00	40	0	0	4	43	68869	68908	3e-16	75.0
SRR492407.146727251	100.00	62	0	0	40	101	68928	68867	2e-28	115
SRR492407.147214391	90.41	73	7	0	1	73	109658	109730	6e-23	97.1
SRR492407.147214391	100.00	27	0	0	75	101	109761	109787	5e-09	51.0
SRR492407.147346512	100.00	65	0	0	1	65	101620	101684	4e-30	121
SRR492407.147346512	100.00	39	0	0	63	101	63903	63941	1e-15	73.1
SRR492407.147611431	98.15	54	1	0	1	54	69437	69490	2e-22	95.3
SRR492407.147611431	89.58	48	4	1	55	101	29776	29823	8e-12	60.2
SRR492407.147611432	89.74	39	2	2	1	39	99960	99924	2e-08	49.1
SRR492407.147611432	92.98	57	3	1	42	97	29832	29776	2e-18	82.4
SRR492407.147627961	96.00	25	1	0	2	26	688	664	3e-06	41.7
SRR492407.147627961	100.00	42	0	0	27	68	654	613	2e-17	78.7
SRR492407.147925821	98.25	57	0	1	1	57	55395	55340	2e-23	99.0
SRR492407.147925821	96.15	52	2	0	50	101	54950	55001	1e-19	86.1
SRR492407.148463021	100.00	66	0	0	1	66	105787	105852	1e-30	122
SRR492407.148463021	100.00	34	0	0	68	101	91743	91710	6e-13	63.9
SRR492407.150929801	100.00	47	0	0	1	47	32575	32529	4e-20	87.9
SRR492407.150929801	100.00	52	0	0	50	101	48480	48531	6e-23	97.1
SRR492407.151375021	98.15	54	0	1	1	53	92324	92377	8e-22	93.5
SRR492407.151375021	98.36	61	0	1	42	101	92773	92833	1e-25	106
SRR492407.151636992	100.00	70	0	0	1	70	91158	91227	6e-33	130
SRR492407.151636992	97.44	39	1	0	63	101	32454	32416	5e-14	67.6
SRR492407.151678351	100.00	75	0	0	1	75	89136	89062	1e-35	139
SRR492407.151678351	100.00	25	0	0	77	101	50143	50167	6e-08	47.3
SRR492407.151903642	95.45	88	0	3	1	85	114093	114179	4e-35	137
SRR492407.151903642	100.00	27	0	0	75	101	114190	114216	5e-09	51.0
SRR492407.15224691	85.71	63	8	1	1	63	104450	104389	2e-13	65.8
SRR492407.15224691	100.00	86	0	0	16	101	103492	103407	8e-42	159
SRR492407.152522992	100.00	30	0	0	1	30	65699	65728	1e-10	56.5
SRR492407.152522992	96.47	85	2	1	18	101	65950	65866	1e-35	139
SRR492407.152709331	100.00	77	0	0	1	77	117473	117397	8e-37	143
SRR492407.152709331	100.00	22	0	0	80	101	52963	52984	3e-06	41.7
SRR492407.15271112	100.00	40	0	0	1	40	70659	70698	3e-16	75.0
SRR492407.15271112	100.00	61	0	0	41	101	113298	113238	6e-28	113
SRR492407.153157761	100.00	59	0	0	1	59	33182	33240	8e-27	110
SRR492407.153157761	100.00	46	0	0	55	100	33363	33318	1e-19	86.1
SRR492407.153157762	100.00	84	0	0	1	84	33280	33363	1e-40	156
SRR492407.153157762	100.00	22	0	0	80	101	33240	33219	3e-06	41.7
SRR492407.153688102	98.25	57	0	1	1	57	70868	70813	2e-23	99.0
SRR492407.153688102	92.75	69	5	0	33	101	127966	128034	5e-24	100
SRR492407.154005781	100.00	42	0	0	1	42	17027	16986	2e-17	78.7
SRR492407.154005781	100.00	63	0	0	39	101	25936	25874	5e-29	117
SRR492407.154005782	100.00	47	0	0	1	47	73003	72957	4e-20	87.9
SRR492407.154005782	100.00	56	0	0	46	101	25854	25909	4e-25	104
SRR492407.154359451	100.00	59	0	0	1	59	98381	98323	8e-27	110
SRR492407.154359451	100.00	42	0	0	60	101	102999	103040	2e-17	78.7
SRR492407.155524871	96.30	27	1	0	1	27	69464	69490	2e-07	45.4
SRR492407.155524871	92.98	57	3	1	28	83	29776	29832	2e-18	82.4
SRR492407.155524872	91.23	57	4	1	1	56	9123	9179	8e-17	76.8
SRR492407.155524872	90.48	42	3	1	49	89	100022	99981	4e-10	54.7
SRR492407.155927161	100.00	55	0	0	1	55	93617	93563	1e-24	102
SRR492407.155927161	100.00	45	0	0	57	101	122099	122143	5e-19	84.2
SRR492407.1561792	91.07	56	4	1	1	55	9124	9179	3e-16	75.0
SRR492407.1561792	90.48	42	3	1	48	88	100022	99981	4e-10	54.7
SRR492407.15698772	100.00	65	0	0	1	65	87621	87685	4e-30	121
SRR492407.15698772	100.00	34	0	0	68	101	20765	20732	6e-13	63.9
SRR492407.157653681	100.00	62	0	0	1	62	96302	96241	2e-28	115
SRR492407.157653681	100.00	37	0	0	65	101	91673	91709	1e-14	69.4
SRR492407.15772281	100.00	26	0	0	1	26	38898	38873	2e-08	49.1
SRR492407.15772281	98.77	81	1	0	21	101	41059	40979	2e-37	145
SRR492407.158451211	98.39	62	1	0	1	62	49559	49620	8e-27	110
SRR492407.158451211	97.87	47	1	0	55	101	49779	49733	2e-18	82.4
SRR492407.159443802	100.00	55	0	0	1	55	94015	93961	1e-24	102
SRR492407.159443802	100.00	45	0	0	57	101	26360	26316	5e-19	84.2
SRR492407.159802441	96.00	25	1	0	1	25	688	664	3e-06	41.7
SRR492407.159802441	100.00	42	0	0	26	67	654	613	2e-17	78.7
SRR492407.16024201	100.00	62	0	0	1	62	59483	59544	2e-28	115
SRR492407.16024201	100.00	37	0	0	65	101	18934	18970	1e-14	69.4
SRR492407.16039262	100.00	66	0	0	1	66	18601	18666	1e-30	122
SRR492407.16039262	100.00	41	0	0	61	101	122641	122601	8e-17	76.8
SRR492407.161470531	100.00	46	0	0	1	46	83817	83772	1e-19	86.1
SRR492407.161470531	100.00	64	0	0	38	101	83547	83610	1e-29	119
SRR492407.162341851	100.00	93	0	0	1	93	9596	9688	1e-45	172
SRR492407.162341851	88.24	34	3	1	67	100	8088	8120	1e-05	39.9
SRR492407.162571411	92.68	41	3	0	1	41	87044	87084	8e-12	60.2
SRR492407.162571411	88.10	42	5	0	59	100	87897	87938	5e-09	51.0
SRR492407.16327201	93.10	29	2	0	1	29	38079	38107	8e-07	43.6
SRR492407.16327201	83.93	56	7	2	39	93	38136	38190	1e-09	52.8
SRR492407.1636531	100.00	41	0	0	1	41	66585	66625	8e-17	76.8
SRR492407.1636531	100.00	39	0	0	36	74	20964	21002	1e-15	73.1
SRR492407.1636532	100.00	39	0	0	1	39	21002	20964	1e-15	73.1
SRR492407.1636532	100.00	41	0	0	34	74	66625	66585	8e-17	76.8
SRR492407.164622641	100.00	79	0	0	1	79	97953	97875	6e-38	147
SRR492407.164622641	85.11	47	3	2	58	101	78135	78090	2e-07	45.4
SRR492407.164907142	100.00	85	0	0	1	85	122288	122372	3e-41	158
SRR492407.164907142	100.00	21	0	0	81	101	52137	52117	1e-05	39.9
SRR492407.166064491	100.00	26	0	0	1	26	94817	94792	2e-08	49.1
SRR492407.166064491	98.84	86	1	0	16	101	94831	94916	4e-40	154
SRR492407.166338362	97.92	48	1	0	1	48	85018	84971	5e-19	84.2
SRR492407.166338362	98.57	70	1	0	32	101	84850	84919	3e-31	124
SRR492407.167095741	94.25	87	2	3	1	87	4243	4160	6e-33	130
SRR492407.167095741	90.70	43	0	1	63	101	70216	70174	4e-10	54.7
SRR492407.168047081	98.72	78	1	0	1	78	103597	103520	1e-35	139
SRR492407.168047081	100.00	23	0	0	79	101	86647	86669	8e-07	43.6
SRR492407.168501662	100.00	77	0	0	1	77	5178	5254	8e-37	143
SRR492407.168501662	100.00	22	0	0	80	101	21153	21174	3e-06	41.7
SRR492407.16966492	100.00	66	0	0	1	66	11243	11178	1e-30	122
SRR492407.16966492	100.00	41	0	0	61	101	11495	11535	8e-17	76.8
SRR492407.170403162	100.00	60	0	0	1	60	105308	105249	2e-27	111
SRR492407.170403162	100.00	46	0	0	56	101	105322	105367	1e-19	86.1
SRR492407.170566721	100.00	47	0	0	1	47	106044	106090	4e-20	87.9
SRR492407.170566721	96.55	58	2	0	44	101	105862	105919	6e-23	97.1
SRR492407.171417482	100.00	34	0	0	1	34	84204	84171	6e-13	63.9
SRR492407.171417482	100.00	67	0	0	35	101	1	67	3e-31	124
SRR492407.171765802	100.00	39	0	0	1	39	55200	55238	1e-15	73.1
SRR492407.171765802	98.63	73	1	0	29	101	55148	55076	6e-33	130
SRR492407.171875992	95.12	41	2	0	1	41	104845	104805	2e-13	65.8
SRR492407.171875992	100.00	69	0	0	33	101	111494	111562	2e-32	128
SRR492407.173231401	100.00	64	0	0	1	64	107032	106969	1e-29	119
SRR492407.173231401	100.00	42	0	0	60	101	34811	34770	2e-17	78.7
SRR492407.173317802	100.00	56	0	0	1	56	78724	78669	4e-25	104
SRR492407.173317802	97.73	44	1	0	58	101	41209	41166	8e-17	76.8
SRR492407.17362071	100.00	58	0	0	1	58	54488	54545	3e-26	108
SRR492407.17362071	100.00	47	0	0	55	101	55075	55029	4e-20	87.9
SRR492407.17376611	100.00	32	0	0	1	32	57183	57152	8e-12	60.2
SRR492407.17376611	100.00	70	0	0	32	101	64308	64239	6e-33	130
SRR492407.174631881	100.00	32	0	0	1	32	61672	61641	8e-12	60.2
SRR492407.174631881	100.00	74	0	0	28	101	61604	61677	4e-35	137
SRR492407.174785902	100.00	59	0	0	1	59	46964	46906	8e-27	110
SRR492407.174785902	100.00	49	0	0	53	101	14260	14212	3e-21	91.6
SRR492407.175571351	100.00	90	0	0	1	90	9599	9688	5e-44	167
SRR492407.175571351	88.24	34	3	1	64	97	8088	8120	1e-05	39.9
SRR492407.17586832	100.00	24	0	0	1	24	26450	26427	2e-07	45.4
SRR492407.17586832	100.00	84	0	0	18	101	87082	86999	1e-40	156
SRR492407.176327301	98.31	59	1	0	1	59	117423	117481	4e-25	104
SRR492407.176327301	100.00	43	0	0	59	101	85222	85180	6e-18	80.5
SRR492407.177395641	100.00	37	0	0	1	37	104318	104282	1e-14	69.4
SRR492407.177395641	100.00	64	0	0	38	101	103905	103842	1e-29	119
SRR492407.177521791	98.67	75	1	0	1	75	60255	60329	5e-34	134
SRR492407.177521791	95.65	23	1	0	79	101	60349	60371	4e-05	38.1
SRR492407.17758672	100.00	54	0	0	1	54	53904	53851	5e-24	100
SRR492407.17758672	100.00	45	0	0	57	101	111215	111259	5e-19	84.2
SRR492407.178130082	100.00	59	0	0	1	59	106378	106436	8e-27	110
SRR492407.178130082	100.00	46	0	0	56	101	69723	69678	1e-19	86.1
SRR492407.178277361	100.00	63	0	0	1	63	61401	61463	5e-29	117
SRR492407.178277361	100.00	37	0	0	65	101	13459	13423	1e-14	69.4
SRR492407.178410162	100.00	84	0	0	1	84	13608	13525	1e-40	156
SRR492407.178410162	90.32	31	1	2	61	90	88102	88073	1e-05	39.9
SRR492407.17850892	100.00	73	0	0	1	73	96460	96388	1e-34	135
SRR492407.17850892	100.00	25	0	0	75	99	128208	128184	6e-08	47.3
SRR492407.179997161	100.00	64	0	0	1	64	104341	104404	1e-29	119
SRR492407.179997161	100.00	35	0	0	67	101	107232	107266	2e-13	65.8
SRR492407.180375461	98.72	78	0	1	1	77	80413	80490	4e-35	137
SRR492407.180375461	100.00	35	0	0	66	100	80367	80333	2e-13	65.8
SRR492407.18071682	98.84	86	0	1	1	86	92364	92448	1e-39	152
SRR492407.18071682	100.00	23	0	0	79	101	92294	92272	8e-07	43.6
SRR492407.182003151	100.00	67	0	0	1	67	25920	25854	3e-31	124
SRR492407.182003151	96.88	32	1	0	66	97	72957	72988	4e-10	54.7
SRR492407.182606011	98.78	82	1	0	1	82	91939	92020	6e-38	147
SRR492407.182606011	100.00	23	0	0	79	101	107615	107593	8e-07	43.6
SRR492407.182725131	100.00	39	0	0	1	39	115701	115739	1e-15	73.1
SRR492407.182725131	100.00	68	0	0	34	101	115052	115119	8e-32	126
SRR492407.183256001	100.00	76	0	0	1	76	79240	79315	3e-36	141
SRR492407.183256001	100.00	30	0	0	72	101	95475	95504	1e-10	56.5
SRR492407.183591901	100.00	58	0	0	1	58	83469	83412	3e-26	108
SRR492407.183591901	100.00	43	0	0	59	101	90912	90870	6e-18	80.5
SRR492407.184092562	100.00	82	0	0	1	82	99911	99830	1e-39	152
SRR492407.184092562	100.00	21	0	0	81	101	88469	88449	1e-05	39.9
SRR492407.184256321	100.00	67	0	0	1	67	109627	109693	3e-31	124
SRR492407.184256321	100.00	40	0	0	62	101	109620	109581	3e-16	75.0
SRR492407.18517861	98.90	91	1	0	1	91	115777	115687	6e-43	163
SRR492407.18517861	100.00	25	0	0	77	101	119600	119576	6e-08	47.3
SRR492407.18542171	100.00	58	0	0	1	58	51457	51400	3e-26	108
SRR492407.18542171	93.94	33	1	1	58	90	27941	27910	2e-08	49.1
SRR492407.185675011	98.84	86	1	0	1	86	37066	37151	4e-40	154
SRR492407.185675011	100.00	27	0	0	75	101	70468	70442	5e-09	51.0
SRR492407.185883202	100.00	62	0	0	1	62	99874	99813	2e-28	115
SRR492407.185883202	100.00	45	0	0	57	101	99609	99653	5e-19	84.2
SRR492407.185901571	97.83	46	1	0	1	46	49194	49239	6e-18	80.5
SRR492407.185901571	100.00	67	0	0	35	101	97774	97840	3e-31	124
SRR492407.186087752	100.00	57	0	0	1	57	72458	72514	1e-25	106
SRR492407.186087752	97.67	43	1	0	57	99	79720	79762	3e-16	75.0
SRR492407.186308532	100.00	38	0	0	1	38	99449	99412	4e-15	71.3
SRR492407.186308532	100.00	62	0	0	40	101	85045	84984	2e-28	115
SRR492407.186570442	100.00	79	0	0	1	79	99300	99222	6e-38	147
SRR492407.186570442	100.00	32	0	0	70	101	97354	97323	8e-12	60.2
SRR492407.186635451	100.00	76	0	0	1	76	1349	1274	3e-36	141
SRR492407.186635451	100.00	29	0	0	73	101	1352	1380	4e-10	54.7
SRR492407.187037122	100.00	50	0	0	1	50	23539	23588	8e-22	93.5
SRR492407.187037122	93.48	46	3	0	52	97	47066	47111	1e-14	69.4
SRR492407.187038001	100.00	41	0	0	1	41	25894	25854	8e-17	76.8
SRR492407.187038001	98.28	58	1	0	40	97	72957	73014	1e-24	102
SRR492407.187284931	100.00	24	0	0	1	24	34348	34325	2e-07	45.4
SRR492407.187284931	100.00	77	0	0	25	101	32810	32886	8e-37	143
SRR492407.187869061	100.00	56	0	0	1	56	75836	75891	4e-25	104
SRR492407.187869061	97.67	43	1	0	59	101	96943	96901	3e-16	75.0
SRR492407.18853971	100.00	75	0	0	1	75	14611	14685	1e-35	139
SRR492407.18853971	100.00	33	0	0	69	101	78348	78316	2e-12	62.1
SRR492407.189353571	96.00	25	1	0	2	26	688	664	3e-06	41.7
SRR492407.189353571	100.00	42	0	0	27	68	654	613	2e-17	78.7
SRR492407.190003852	100.00	65	0	0	1	65	104260	104196	4e-30	121
SRR492407.190003852	100.00	36	0	0	66	101	71753	71718	5e-14	67.6
SRR492407.191084362	100.00	47	0	0	1	47	78257	78211	4e-20	87.9
SRR492407.191084362	100.00	56	0	0	46	101	74900	74845	4e-25	104
SRR492407.191314342	100.00	59	0	0	1	59	108162	108220	8e-27	110
SRR492407.191314342	97.92	48	1	0	54	101	79065	79018	5e-19	84.2
SRR492407.191597032	100.00	73	0	0	1	73	93527	93599	1e-34	135
SRR492407.191597032	97.67	43	0	1	60	101	47033	47075	1e-15	73.1
SRR492407.191689521	96.30	27	1	0	1	27	97967	97993	2e-07	45.4
SRR492407.191689521	97.47	79	2	0	18	96	98234	98156	1e-34	135
SRR492407.191996601	100.00	58	0	0	1	58	109525	109582	3e-26	108
SRR492407.191996601	100.00	40	0	0	59	98	101111	101072	3e-16	75.0
SRR492407.192748442	100.00	32	0	0	1	32	34657	34626	8e-12	60.2
SRR492407.192748442	96.15	78	2	1	18	95	106928	106852	8e-32	126
SRR492407.193224861	98.90	91	0	1	1	91	66789	66700	2e-42	161
SRR492407.193224861	81.13	53	5	5	53	101	2023	1972	4e-05	38.1
SRR492407.19355491	100.00	81	0	0	1	81	73183	73263	5e-39	150
SRR492407.19355491	100.00	27	0	0	75	101	73467	73441	5e-09	51.0
SRR492407.194366071	100.00	56	0	0	1	56	16943	16998	4e-25	104
SRR492407.194366071	97.14	35	0	1	50	83	18112	18078	3e-11	58.4
SRR492407.194366072	100.00	28	0	0	1	28	18085	18112	1e-09	52.8
SRR492407.194366072	100.00	56	0	0	22	77	16998	16943	4e-25	104
SRR492407.194676241	100.00	34	0	0	1	34	85256	85289	6e-13	63.9
SRR492407.194676241	100.00	71	0	0	31	101	64285	64355	2e-33	132
SRR492407.195537402	100.00	73	0	0	1	73	87987	88059	1e-34	135
SRR492407.195537402	100.00	28	0	0	74	101	124462	124435	1e-09	52.8
SRR492407.195854121	94.64	56	3	0	1	56	64409	64464	4e-20	87.9
SRR492407.195854121	100.00	61	0	0	41	101	64472	64412	6e-28	113
SRR492407.195961581	96.72	61	2	0	1	61	69430	69490	1e-24	102
SRR492407.195961581	94.44	36	1	1	62	96	29776	29811	4e-10	54.7
SRR492407.195961582	90.91	55	4	1	1	54	9125	9179	1e-15	73.1
SRR492407.195961582	90.48	42	3	1	47	87	100022	99981	4e-10	54.7
SRR492407.196225961	100.00	47	0	0	1	47	45217	45263	4e-20	87.9
SRR492407.196225961	98.33	60	1	0	42	101	45371	45312	1e-25	106
SRR492407.196744191	100.00	67	0	0	1	67	1041	1107	3e-31	124
SRR492407.196744191	100.00	34	0	0	68	101	88374	88341	6e-13	63.9
SRR492407.19696602	100.00	41	0	0	1	41	4489	4449	8e-17	76.8
SRR492407.19696602	96.05	76	1	2	27	101	4493	4567	1e-30	122
SRR492407.197844781	100.00	30	0	0	1	30	98534	98563	1e-10	56.5
SRR492407.197844781	100.00	60	0	0	31	90	98611	98670	2e-27	111
SRR492407.197844782	100.00	60	0	0	1	60	98670	98611	2e-27	111
SRR492407.197844782	100.00	30	0	0	61	90	98563	98534	1e-10	56.5
SRR492407.197871821	100.00	81	0	0	1	81	51616	51696	5e-39	150
SRR492407.197871821	100.00	21	0	0	81	101	102142	102162	1e-05	39.9
SRR492407.197953871	98.55	69	1	0	1	69	104719	104651	1e-30	122
SRR492407.197953871	100.00	33	0	0	69	101	90699	90667	2e-12	62.1
SRR492407.198141752	98.86	88	0	1	1	88	49874	49960	1e-40	156
SRR492407.198141752	96.15	26	1	0	76	101	45198	45223	8e-07	43.6
SRR492407.198742681	100.00	65	0	0	1	65	57246	57310	4e-30	121
SRR492407.198742681	100.00	36	0	0	66	101	113459	113494	5e-14	67.6
SRR492407.200789901	95.52	67	1	2	5	70	82851	82786	1e-25	106
SRR492407.200789901	100.00	49	0	0	53	101	82786	82834	3e-21	91.6
SRR492407.20159262	100.00	79	0	0	1	79	90437	90515	6e-38	147
SRR492407.20159262	100.00	22	0	0	80	101	86724	86745	3e-06	41.7
SRR492407.202185762	100.00	82	0	0	1	82	93662	93743	1e-39	152
SRR492407.202185762	86.49	37	4	1	57	93	42002	41967	1e-05	39.9
SRR492407.203114961	100.00	27	0	0	1	27	115830	115856	5e-09	51.0
SRR492407.203114961	100.00	86	0	0	16	101	90515	90430	8e-42	159
SRR492407.203608651	100.00	79	0	0	1	79	56097	56175	6e-38	147
SRR492407.203608651	100.00	22	0	0	80	101	106562	106541	3e-06	41.7
SRR492407.204872092	100.00	39	0	0	1	39	38644	38682	1e-15	73.1
SRR492407.204872092	100.00	61	0	0	41	101	97000	96940	6e-28	113
SRR492407.204876881	100.00	79	0	0	1	79	45781	45703	6e-38	147
SRR492407.204876881	100.00	22	0	0	80	101	100068	100047	3e-06	41.7
SRR492407.205911631	98.88	89	0	1	1	88	58240	58152	3e-41	158
SRR492407.205911631	92.86	28	1	1	74	101	73033	73007	1e-05	39.9
SRR492407.205911632	100.00	75	0	0	1	75	25928	25854	1e-35	139
SRR492407.205911632	100.00	28	0	0	74	101	72957	72984	1e-09	52.8
SRR492407.2061582	97.78	45	0	1	1	44	107294	107338	8e-17	76.8
SRR492407.2061582	100.00	66	0	0	36	101	107480	107415	1e-30	122
SRR492407.206301021	92.98	57	2	2	1	57	99978	99924	2e-18	82.4
SRR492407.206301021	87.18	39	5	0	60	98	29832	29794	2e-07	45.4
SRR492407.206301022	100.00	29	0	0	1	29	27676	27704	4e-10	54.7
SRR492407.206301022	95.59	68	3	0	34	101	69423	69490	8e-27	110
SRR492407.20652352	100.00	63	0	0	1	63	90054	89992	5e-29	117
SRR492407.20652352	97.56	41	1	0	61	101	48903	48863	4e-15	71.3
SRR492407.206602921	100.00	76	0	0	1	76	22850	22925	3e-36	141
SRR492407.206602921	100.00	23	0	0	79	101	89287	89265	8e-07	43.6
SRR492407.207016291	94.29	70	4	0	1	70	122939	123008	3e-26	108
SRR492407.207016291	100.00	47	0	0	55	101	122932	122886	4e-20	87.9
SRR492407.207244692	100.00	40	0	0	1	40	25893	25854	3e-16	75.0
SRR492407.207244692	96.83	63	2	0	39	101	72957	73019	1e-25	106
SRR492407.207295631	100.00	33	0	0	1	33	9707	9675	2e-12	62.1
SRR492407.207295631	100.00	66	0	0	36	101	9688	9623	1e-30	122
SRR492407.207520291	97.92	48	1	0	1	48	12526	12573	5e-19	84.2
SRR492407.207520291	100.00	53	0	0	49	101	17553	17501	2e-23	99.0
SRR492407.207560332	100.00	71	0	0	1	71	89531	89461	2e-33	132
SRR492407.207560332	100.00	28	0	0	74	101	40065	40092	1e-09	52.8
SRR492407.20806031	100.00	26	0	0	1	26	104256	104231	2e-08	49.1
SRR492407.20806031	96.20	79	3	0	23	101	104214	104292	6e-33	130
SRR492407.208696092	100.00	55	0	0	1	55	121279	121225	1e-24	102
SRR492407.208696092	100.00	48	0	0	54	101	11535	11582	1e-20	89.8
SRR492407.209129221	100.00	41	0	0	1	41	94041	94001	8e-17	76.8
SRR492407.209129221	100.00	65	0	0	37	101	93894	93958	4e-30	121
SRR492407.209129222	100.00	81	0	0	1	81	93974	93894	5e-39	150
SRR492407.209129222	100.00	25	0	0	77	101	94001	94025	6e-08	47.3
SRR492407.209263691	96.67	60	2	0	1	60	108228	108287	5e-24	100
SRR492407.209263691	98.11	53	1	0	49	101	109196	109144	8e-22	93.5
SRR492407.210011652	100.00	71	0	0	1	71	93748	93818	2e-33	132
SRR492407.210011652	97.56	41	0	1	61	101	93722	93683	1e-14	69.4
SRR492407.210374811	100.00	23	0	0	1	23	94303	94281	8e-07	43.6
SRR492407.210374811	100.00	78	0	0	24	101	96288	96365	2e-37	145
SRR492407.210544782	100.00	53	0	0	1	53	40116	40168	2e-23	99.0
SRR492407.210544782	95.16	62	2	1	41	101	40111	40050	6e-23	97.1
SRR492407.211534101	97.73	44	0	1	1	44	87560	87518	3e-16	75.0
SRR492407.211534101	98.53	68	1	0	34	101	87294	87361	4e-30	121
SRR492407.212069411	100.00	34	0	0	1	34	37903	37936	6e-13	63.9
SRR492407.212069411	100.00	75	0	0	27	101	38150	38076	1e-35	139
SRR492407.212741762	100.00	66	0	0	1	66	88079	88014	1e-30	122
SRR492407.212741762	100.00	35	0	0	67	101	91043	91077	2e-13	65.8
SRR492407.213176581	100.00	70	0	0	1	70	95162	95093	6e-33	130
SRR492407.213176581	100.00	31	0	0	71	101	97983	97953	3e-11	58.4
SRR492407.214843892	100.00	80	0	0	1	80	8243	8322	2e-38	148
SRR492407.214843892	97.06	34	1	0	68	101	4397	4430	3e-11	58.4
SRR492407.214898962	97.06	68	1	1	1	67	79906	79973	6e-28	113
SRR492407.214898962	97.78	45	1	0	57	101	80724	80768	2e-17	78.7
SRR492407.215310091	100.00	36	0	0	1	36	84553	84588	5e-14	67.6
SRR492407.215310091	97.06	68	2	0	31	98	84728	84661	2e-28	115
SRR492407.215335491	98.59	71	1	0	1	71	58112	58042	8e-32	126
SRR492407.215335491	96.30	27	1	0	73	99	101953	101927	2e-07	45.4
SRR492407.215575231	100.00	50	0	0	1	50	102913	102864	8e-22	93.5
SRR492407.215575231	100.00	49	0	0	53	101	95744	95792	3e-21	91.6
SRR492407.215761111	100.00	69	0	0	1	69	68760	68692	2e-32	128
SRR492407.215761111	97.14	35	0	1	66	100	91049	91016	3e-11	58.4
SRR492407.216093631	100.00	40	0	0	1	40	73729	73768	3e-16	75.0
SRR492407.216093631	100.00	59	0	0	43	101	105852	105794	8e-27	110
SRR492407.216110941	94.74	38	1	1	1	37	86913	86876	3e-11	58.4
SRR492407.216110941	100.00	79	0	0	23	101	92581	92503	6e-38	147
SRR492407.21823401	100.00	43	0	0	1	43	109711	109669	6e-18	80.5
SRR492407.21823401	100.00	64	0	0	38	101	109698	109761	1e-29	119
SRR492407.22003012	89.74	39	4	0	1	39	106398	106436	5e-09	51.0
SRR492407.22003012	87.18	39	5	0	63	101	106449	106487	2e-07	45.4
SRR492407.220557081	100.00	34	0	0	1	34	109229	109196	6e-13	63.9
SRR492407.220557081	100.00	72	0	0	30	101	103646	103717	5e-34	134
SRR492407.22096231	87.63	97	7	5	1	92	127319	127223	3e-26	108
SRR492407.22096231	100.00	50	0	0	52	101	64567	64616	8e-22	93.5
SRR492407.22096232	100.00	85	0	0	1	85	64651	64567	3e-41	158
SRR492407.22096232	80.65	62	7	5	45	101	127223	127284	8e-07	43.6
SRR492407.221142212	100.00	31	0	0	1	31	91539	91509	3e-11	58.4
SRR492407.221142212	100.00	73	0	0	29	101	91546	91618	1e-34	135
SRR492407.221366182	100.00	60	0	0	1	60	55035	55094	2e-27	111
SRR492407.221366182	94.34	53	2	1	50	101	40001	40053	6e-18	80.5
SRR492407.222085032	100.00	33	0	0	1	33	9707	9675	2e-12	62.1
SRR492407.222085032	100.00	66	0	0	36	101	9688	9623	1e-30	122
SRR492407.222669021	98.70	77	1	0	1	77	21651	21727	4e-35	137
SRR492407.222669021	100.00	34	0	0	68	101	126831	126798	6e-13	63.9
SRR492407.223076241	100.00	27	0	0	1	27	91437	91411	5e-09	51.0
SRR492407.223076241	100.00	80	0	0	22	101	91384	91463	2e-38	148
SRR492407.22356171	100.00	25	0	0	1	25	87504	87528	6e-08	47.3
SRR492407.22356171	100.00	81	0	0	18	98	97772	97852	5e-39	150
SRR492407.224143062	100.00	62	0	0	1	62	108234	108295	2e-28	115
SRR492407.224143062	100.00	37	0	0	65	101	103928	103892	1e-14	69.4
SRR492407.226250342	100.00	28	0	0	1	28	90385	90358	1e-09	52.8
SRR492407.226250342	100.00	75	0	0	27	101	90336	90262	1e-35	139
SRR492407.226779812	100.00	76	0	0	1	76	87701	87626	3e-36	141
SRR492407.226779812	100.00	24	0	0	78	101	109487	109464	2e-07	45.4
SRR492407.227841481	98.39	62	1	0	1	62	86346	86285	8e-27	110
SRR492407.227841481	97.67	43	0	1	58	99	85671	85629	1e-15	73.1
SRR492407.227910081	100.00	81	0	0	1	81	3691	3771	5e-39	150
SRR492407.227910081	100.00	20	0	0	82	101	74589	74608	4e-05	38.1
SRR492407.227959791	100.00	57	0	0	1	57	55096	55040	1e-25	106
SRR492407.227959791	100.00	43	0	0	59	101	100437	100395	6e-18	80.5
SRR492407.228295401	96.43	84	2	1	1	83	106395	106312	4e-35	137
SRR492407.228295401	96.43	28	1	0	72	99	106116	106143	6e-08	47.3
SRR492407.228408681	100.00	58	0	0	1	58	105230	105287	3e-26	108
SRR492407.228408681	96.88	32	1	0	48	79	106581	106612	4e-10	54.7
SRR492407.228423871	97.06	34	1	0	1	34	15838	15871	3e-11	58.4
SRR492407.228423871	97.40	77	2	0	24	100	32937	32861	2e-33	132
SRR492407.228462152	100.00	79	0	0	1	79	38118	38196	6e-38	147
SRR492407.228462152	100.00	21	0	0	81	101	115824	115844	1e-05	39.9
SRR492407.22889082	100.00	38	0	0	1	38	104592	104555	4e-15	71.3
SRR492407.22889082	100.00	71	0	0	31	101	88918	88848	2e-33	132
SRR492407.232065781	97.06	34	1	0	1	34	36171	36204	3e-11	58.4
SRR492407.232065781	100.00	77	0	0	25	101	36260	36184	8e-37	143
SRR492407.232598352	100.00	73	0	0	1	73	122641	122569	1e-34	135
SRR492407.232598352	100.00	28	0	0	74	101	97626	97599	1e-09	52.8
SRR492407.232801831	91.67	60	4	1	4	62	9120	9179	2e-18	82.4
SRR492407.232801831	90.48	42	3	1	55	95	100022	99981	4e-10	54.7
SRR492407.232801832	97.78	45	1	0	1	45	69446	69490	2e-17	78.7
SRR492407.232801832	89.09	55	5	1	46	99	29776	29830	5e-14	67.6
SRR492407.233228082	100.00	81	0	0	1	81	23180	23260	5e-39	150
SRR492407.233228082	91.18	34	2	1	69	101	28229	28196	2e-07	45.4
SRR492407.233360461	98.59	71	1	0	1	71	20097	20167	8e-32	126
SRR492407.233360461	100.00	32	0	0	62	93	20229	20198	8e-12	60.2
SRR492407.233360462	100.00	32	0	0	1	32	20198	20229	8e-12	60.2
SRR492407.233360462	98.59	71	1	0	23	93	20167	20097	8e-32	126
SRR492407.234410721	100.00	29	0	0	1	29	83586	83614	4e-10	54.7
SRR492407.234410721	100.00	75	0	0	27	101	83634	83560	1e-35	139
SRR492407.234720242	100.00	62	0	0	1	62	105292	105353	2e-28	115
SRR492407.234720242	97.50	40	1	0	59	98	105265	105226	1e-14	69.4
SRR492407.234849611	93.18	44	3	0	1	44	101098	101141	2e-13	65.8
SRR492407.234849611	94.74	57	3	0	45	101	29916	29860	1e-20	89.8
SRR492407.235260212	100.00	65	0	0	1	65	94899	94963	4e-30	121
SRR492407.235260212	100.00	35	0	0	67	101	115045	115011	2e-13	65.8
SRR492407.23581121	100.00	75	0	0	1	75	100990	101064	1e-35	139
SRR492407.23581121	95.83	24	1	0	78	101	20975	20998	1e-05	39.9
SRR492407.235894812	100.00	53	0	0	1	53	23022	23074	2e-23	99.0
SRR492407.235894812	100.00	46	0	0	56	101	92938	92893	1e-19	86.1
SRR492407.236463601	100.00	70	0	0	1	70	45943	45874	6e-33	130
SRR492407.236463601	100.00	36	0	0	66	101	45675	45710	5e-14	67.6
SRR492407.236490661	98.72	78	1	0	1	78	94800	94723	1e-35	139
SRR492407.236490661	96.15	26	1	0	76	101	46256	46281	8e-07	43.6
SRR492407.236694062	100.00	58	0	0	1	58	47103	47160	3e-26	108
SRR492407.236694062	100.00	41	0	0	61	101	97987	98027	8e-17	76.8
SRR492407.237058711	100.00	28	0	0	1	28	200	173	1e-09	52.8
SRR492407.237058711	95.65	69	3	0	31	99	180	112	2e-27	111
SRR492407.237731622	91.30	92	7	1	1	92	35295	35205	3e-31	124
SRR492407.237731622	80.00	55	9	2	44	98	35204	35256	1e-05	39.9
SRR492407.239354101	96.61	59	1	1	1	59	90442	90385	6e-23	97.1
SRR492407.239354101	100.00	49	0	0	53	101	720	672	3e-21	91.6
SRR492407.239433632	100.00	42	0	0	1	42	21968	21927	2e-17	78.7
SRR492407.239433632	100.00	58	0	0	44	101	38573	38630	3e-26	108
SRR492407.239970621	96.30	27	1	0	1	27	44261	44235	2e-07	45.4
SRR492407.239970621	96.30	81	3	0	21	101	44209	44289	5e-34	134
SRR492407.240196972	96.00	25	1	0	3	27	688	664	3e-06	41.7
SRR492407.240196972	95.92	49	2	0	28	76	654	606	6e-18	80.5
SRR492407.240663301	100.00	51	0	0	1	51	26323	26373	2e-22	95.3
SRR492407.240663301	100.00	50	0	0	52	101	24410	24459	8e-22	93.5
SRR492407.240663302	100.00	69	0	0	1	69	24478	24410	2e-32	128
SRR492407.240663302	100.00	32	0	0	70	101	26373	26342	8e-12	60.2
SRR492407.241423271	100.00	49	0	0	1	49	100110	100062	3e-21	91.6
SRR492407.241423271	98.15	54	1	0	42	95	100023	100076	2e-22	95.3
SRR492407.241793561	100.00	38	0	0	1	38	3299	3262	4e-15	71.3
SRR492407.241793561	100.00	67	0	0	35	101	3245	3311	3e-31	124
SRR492407.242062412	100.00	45	0	0	1	45	19138	19182	5e-19	84.2
SRR492407.242062412	98.28	58	1	0	43	100	100915	100972	1e-24	102
SRR492407.24310531	100.00	45	0	0	1	45	62173	62217	5e-19	84.2
SRR492407.24310531	100.00	62	0	0	40	101	104712	104773	2e-28	115
SRR492407.243797041	100.00	66	0	0	1	66	94651	94716	1e-30	122
SRR492407.243797041	97.44	39	0	1	64	101	93164	93202	2e-13	65.8
SRR492407.243934311	97.62	42	0	1	1	41	58193	58152	4e-15	71.3
SRR492407.243934311	97.01	67	1	1	27	93	73033	72968	2e-27	111
SRR492407.243934312	97.01	67	1	1	1	67	72968	73033	2e-27	111
SRR492407.243934312	97.62	42	0	1	53	93	58152	58193	4e-15	71.3
SRR492407.244097291	100.00	39	0	0	1	39	65969	65931	1e-15	73.1
SRR492407.244097291	95.45	66	3	0	36	101	65877	65942	1e-25	106
SRR492407.244167532	98.55	69	1	0	1	69	102842	102910	1e-30	122
SRR492407.244167532	100.00	30	0	0	72	101	78077	78106	1e-10	56.5
SRR492407.244380822	100.00	53	0	0	1	53	88832	88884	2e-23	99.0
SRR492407.244380822	98.00	50	1	0	52	101	107370	107321	4e-20	87.9
SRR492407.244455902	100.00	67	0	0	1	67	36700	36634	3e-31	124
SRR492407.244455902	100.00	33	0	0	69	101	105739	105771	2e-12	62.1
SRR492407.244878411	100.00	27	0	0	5	31	55002	55028	5e-09	51.0
SRR492407.244878411	88.89	54	5	1	35	88	55046	55098	2e-13	65.8
SRR492407.246090132	100.00	49	0	0	1	49	25902	25854	3e-21	91.6
SRR492407.246090132	100.00	52	0	0	48	99	72957	73008	6e-23	97.1
SRR492407.246324671	100.00	27	0	0	1	27	120480	120506	5e-09	51.0
SRR492407.246324671	97.37	76	2	0	25	100	120532	120457	6e-33	130
SRR492407.246640961	100.00	89	0	0	1	89	68428	68340	2e-43	165
SRR492407.246640961	88.24	34	2	2	68	100	46634	46602	1e-05	39.9
SRR492407.247676652	100.00	66	0	0	1	66	12032	12097	1e-30	122
SRR492407.247676652	100.00	33	0	0	69	101	93581	93613	2e-12	62.1
SRR492407.247998361	85.71	63	8	1	1	63	104450	104389	2e-13	65.8
SRR492407.247998361	98.84	86	1	0	16	101	103492	103407	4e-40	154
SRR492407.248751231	93.48	46	0	3	1	43	114130	114175	2e-13	65.8
SRR492407.248751231	90.12	81	6	2	22	101	114174	114253	4e-25	104
SRR492407.249508782	100.00	47	0	0	1	47	84217	84171	4e-20	87.9
SRR492407.249508782	100.00	54	0	0	48	101	1	54	5e-24	100
SRR492407.25011551	95.35	43	2	0	1	43	86769	86727	1e-14	69.4
SRR492407.25011551	86.21	58	7	1	45	101	86706	86649	2e-12	62.1
SRR492407.250738682	100.00	82	0	0	1	82	85453	85372	1e-39	152
SRR492407.250738682	86.05	43	4	2	60	101	85613	85572	2e-07	45.4
SRR492407.250949101	100.00	71	0	0	1	71	40771	40701	2e-33	132
SRR492407.250949101	96.43	28	1	0	74	101	111513	111486	6e-08	47.3
SRR492407.250949102	100.00	58	0	0	1	58	111456	111513	3e-26	108
SRR492407.250949102	100.00	41	0	0	61	101	40701	40741	8e-17	76.8
SRR492407.25136872	98.08	52	0	1	1	51	81980	81929	1e-20	89.8
SRR492407.25136872	98.63	73	0	1	30	101	81929	82001	2e-32	128
SRR492407.251421951	100.00	86	0	0	1	86	62982	63067	8e-42	159
SRR492407.251421951	82.00	50	6	3	48	97	63072	63026	1e-05	39.9
SRR492407.252148332	100.00	48	0	0	1	48	7592	7639	1e-20	89.8
SRR492407.252148332	96.88	64	1	1	38	101	7790	7728	1e-25	106
SRR492407.252881101	100.00	39	0	0	1	39	99890	99852	1e-15	73.1
SRR492407.252881101	98.61	72	1	0	30	101	99910	99981	2e-32	128
SRR492407.253697832	100.00	81	0	0	1	81	110170	110090	5e-39	150
SRR492407.253697832	100.00	20	0	0	82	101	98840	98821	4e-05	38.1
SRR492407.254851822	100.00	41	0	0	1	41	100705	100745	8e-17	76.8
SRR492407.254851822	95.52	67	3	0	34	100	102157	102091	3e-26	108
SRR492407.255072251	98.65	74	1	0	1	74	25927	25854	2e-33	132
SRR492407.255072251	100.00	29	0	0	73	101	72957	72985	4e-10	54.7
SRR492407.256556192	98.75	80	1	0	1	80	104584	104663	8e-37	143
SRR492407.256556192	100.00	21	0	0	81	101	124119	124099	1e-05	39.9
SRR492407.256811041	100.00	66	0	0	1	66	65934	65869	1e-30	122
SRR492407.256811041	100.00	34	0	0	68	101	108777	108744	6e-13	63.9
SRR492407.257487121	100.00	68	0	0	1	68	89223	89156	8e-32	126
SRR492407.257487121	100.00	32	0	0	70	101	91141	91172	8e-12	60.2
SRR492407.257531611	98.46	65	1	0	1	65	103148	103212	2e-28	115
SRR492407.257531611	100.00	35	0	0	67	101	85137	85103	2e-13	65.8
SRR492407.257620662	100.00	33	0	0	1	33	108718	108750	2e-12	62.1
SRR492407.257620662	100.00	66	0	0	36	101	115437	115372	1e-30	122
SRR492407.257642712	100.00	33	0	0	1	33	9707	9675	2e-12	62.1
SRR492407.257642712	100.00	66	0	0	36	101	9688	9623	1e-30	122
SRR492407.25768331	95.24	84	3	1	1	83	98364	98281	2e-33	132
SRR492407.25768331	100.00	24	0	0	78	101	123075	123098	2e-07	45.4
SRR492407.258030021	100.00	70	0	0	1	70	80003	80072	6e-33	130
SRR492407.258030021	100.00	29	0	0	73	101	13832	13860	4e-10	54.7
SRR492407.258924522	100.00	27	0	0	1	27	25880	25854	5e-09	51.0
SRR492407.258924522	98.63	73	0	1	26	98	72957	73028	2e-32	128
SRR492407.261364181	100.00	59	0	0	1	59	77513	77455	8e-27	110
SRR492407.261364181	100.00	40	0	0	62	101	105578	105539	3e-16	75.0
SRR492407.261489231	100.00	64	0	0	1	64	108375	108438	1e-29	119
SRR492407.261489231	100.00	36	0	0	66	101	86923	86888	5e-14	67.6
SRR492407.261778332	100.00	65	0	0	1	65	117269	117333	4e-30	121
SRR492407.261778332	100.00	34	0	0	68	101	102121	102088	6e-13	63.9
SRR492407.262032002	100.00	65	0	0	1	65	91801	91737	4e-30	121
SRR492407.262032002	100.00	36	0	0	66	101	96016	95981	5e-14	67.6
SRR492407.262191922	98.70	77	1	0	1	77	45130	45206	4e-35	137
SRR492407.262191922	96.15	26	1	0	74	99	45196	45221	8e-07	43.6
SRR492407.262314632	96.30	27	1	0	1	27	109359	109385	2e-07	45.4
SRR492407.262314632	92.96	71	4	1	32	101	109317	109387	1e-24	102
SRR492407.262558742	100.00	74	0	0	1	74	58016	57943	4e-35	137
SRR492407.262558742	100.00	26	0	0	76	101	100343	100318	2e-08	49.1
SRR492407.262728412	100.00	28	0	0	1	28	106352	106379	1e-09	52.8
SRR492407.262728412	98.81	84	1	0	18	101	105579	105662	5e-39	150
SRR492407.263127952	100.00	82	0	0	1	82	92283	92364	1e-39	152
SRR492407.263127952	95.83	24	1	0	78	101	45208	45231	1e-05	39.9
SRR492407.263294721	98.51	67	1	0	1	67	108032	107966	1e-29	119
SRR492407.263294721	100.00	26	0	0	76	101	108000	107975	2e-08	49.1
SRR492407.263358872	100.00	56	0	0	1	56	36901	36846	4e-25	104
SRR492407.263358872	100.00	43	0	0	59	101	110135	110177	6e-18	80.5
SRR492407.263482361	100.00	71	0	0	1	71	106144	106074	2e-33	132
SRR492407.263482361	100.00	28	0	0	74	101	41227	41254	1e-09	52.8
SRR492407.263730951	96.74	92	2	1	1	91	60788	60697	1e-39	152
SRR492407.263730951	96.00	25	1	0	77	101	60513	60537	3e-06	41.7
SRR492407.26392271	98.57	70	1	0	1	70	90067	90136	3e-31	124
SRR492407.26392271	96.67	30	1	0	72	101	39692	39663	5e-09	51.0
SRR492407.264418242	100.00	26	0	0	1	26	198	173	2e-08	49.1
SRR492407.264418242	97.10	69	2	0	29	97	180	112	5e-29	117
SRR492407.264949242	100.00	70	0	0	1	70	109241	109310	6e-33	130
SRR492407.264949242	100.00	32	0	0	70	101	108980	108949	8e-12	60.2
SRR492407.265256341	100.00	46	0	0	1	46	97791	97746	1e-19	86.1
SRR492407.265256341	100.00	61	0	0	41	101	97856	97916	6e-28	113
SRR492407.265256342	100.00	68	0	0	1	68	97923	97856	8e-32	126
SRR492407.265256342	100.00	39	0	0	63	101	97746	97784	1e-15	73.1
SRR492407.265958062	93.90	82	5	0	1	82	110022	110103	3e-31	124
SRR492407.265958062	85.71	35	5	0	64	98	124653	124687	4e-05	38.1
SRR492407.266080831	98.80	83	0	1	1	82	58234	58152	6e-38	147
SRR492407.266080831	94.12	34	1	1	68	101	73033	73001	5e-09	51.0
SRR492407.266080832	100.00	53	0	0	1	53	17038	16986	2e-23	99.0
SRR492407.266080832	100.00	52	0	0	50	101	25936	25885	6e-23	97.1
SRR492407.266148361	96.70	91	2	1	1	91	94634	94545	5e-39	150
SRR492407.266148361	100.00	22	0	0	80	101	34255	34276	3e-06	41.7
SRR492407.266293481	98.59	71	1	0	1	71	77407	77477	8e-32	126
SRR492407.266293481	100.00	38	0	0	64	101	77375	77338	4e-15	71.3
SRR492407.266293482	100.00	75	0	0	1	75	77301	77375	1e-35	139
SRR492407.266293482	97.06	34	1	0	68	101	77477	77444	3e-11	58.4
SRR492407.266476232	100.00	28	0	0	1	28	10587	10614	1e-09	52.8
SRR492407.266476232	98.77	81	1	0	21	101	10577	10497	2e-37	145
SRR492407.26678131	100.00	71	0	0	1	71	122166	122096	2e-33	132
SRR492407.26678131	100.00	34	0	0	68	101	121956	121989	6e-13	63.9
SRR492407.26678132	100.00	64	0	0	1	64	122019	121956	1e-29	119
SRR492407.26678132	100.00	41	0	0	61	101	122096	122136	8e-17	76.8
SRR492407.267896391	100.00	69	0	0	1	69	106523	106591	2e-32	128
SRR492407.267896391	90.91	44	2	2	59	101	105277	105319	3e-11	58.4
SRR492407.268664131	100.00	67	0	0	1	67	64039	63973	3e-31	124
SRR492407.268664131	97.30	37	1	0	64	100	64044	64080	6e-13	63.9
SRR492407.26938332	100.00	60	0	0	1	60	86739	86680	2e-27	111
SRR492407.26938332	100.00	39	0	0	63	101	102754	102716	1e-15	73.1
SRR492407.270389092	93.75	80	3	2	1	78	65595	65516	1e-29	119
SRR492407.270389092	100.00	35	0	0	67	101	84352	84386	2e-13	65.8
SRR492407.27068521	100.00	40	0	0	1	40	74882	74843	3e-16	75.0
SRR492407.27068521	98.67	75	1	0	27	101	76498	76424	5e-34	134
SRR492407.270685342	100.00	43	0	0	1	43	88587	88629	6e-18	80.5
SRR492407.270685342	100.00	57	0	0	45	101	45774	45830	1e-25	106
SRR492407.270763341	100.00	57	0	0	1	57	92638	92582	1e-25	106
SRR492407.270763341	94.44	36	2	0	59	94	109020	109055	1e-10	56.5
SRR492407.270894031	100.00	33	0	0	1	33	125560	125528	2e-12	62.1
SRR492407.270894031	98.65	74	1	0	28	101	125581	125654	2e-33	132
SRR492407.271869551	100.00	46	0	0	1	46	29331	29376	1e-19	86.1
SRR492407.271869551	100.00	56	0	0	43	98	109741	109686	4e-25	104
SRR492407.272020042	100.00	40	0	0	1	40	115700	115739	3e-16	75.0
SRR492407.272020042	100.00	67	0	0	35	101	115052	115118	3e-31	124
SRR492407.272403781	100.00	37	0	0	1	37	72471	72435	1e-14	69.4
SRR492407.272403781	100.00	72	0	0	30	101	72486	72557	5e-34	134
SRR492407.273196622	100.00	76	0	0	1	76	106986	106911	3e-36	141
SRR492407.273196622	100.00	24	0	0	78	101	37603	37580	2e-07	45.4
SRR492407.273311651	100.00	54	0	0	1	54	97789	97736	5e-24	100
SRR492407.273311651	100.00	47	0	0	55	101	89219	89265	4e-20	87.9
SRR492407.273438851	100.00	61	0	0	1	61	4520	4580	6e-28	113
SRR492407.273438851	100.00	39	0	0	63	101	55936	55898	1e-15	73.1
SRR492407.274010402	100.00	72	0	0	1	72	124351	124422	5e-34	134
SRR492407.274010402	100.00	27	0	0	75	101	1255	1229	5e-09	51.0
SRR492407.274337281	100.00	72	0	0	1	72	121871	121800	5e-34	134
SRR492407.274337281	93.33	30	2	0	72	101	121787	121758	2e-07	45.4
SRR492407.274353222	100.00	72	0	0	1	72	78378	78449	5e-34	134
SRR492407.274353222	100.00	28	0	0	74	101	78078	78105	1e-09	52.8
SRR492407.276922301	100.00	51	0	0	1	51	90444	90494	2e-22	95.3
SRR492407.276922301	100.00	51	0	0	51	101	96284	96334	2e-22	95.3
SRR492407.276996721	96.67	30	1	0	1	30	114556	114585	5e-09	51.0
SRR492407.276996721	100.00	80	0	0	22	101	114605	114526	2e-38	148
SRR492407.27737341	97.37	38	1	0	1	38	115447	115410	2e-13	65.8
SRR492407.27737341	100.00	70	0	0	32	101	115470	115539	6e-33	130
SRR492407.278834021	94.12	51	2	1	1	51	109834	109883	8e-17	76.8
SRR492407.278834021	100.00	55	0	0	47	101	72001	71947	1e-24	102
SRR492407.279401471	100.00	75	0	0	1	75	93672	93746	1e-35	139
SRR492407.279401471	85.00	40	2	4	47	86	42002	41967	4e-05	38.1
SRR492407.280146501	100.00	63	0	0	1	63	103957	103895	5e-29	117
SRR492407.280146501	100.00	39	0	0	63	101	119383	119421	1e-15	73.1
SRR492407.280810111	100.00	53	0	0	1	53	23595	23543	2e-23	99.0
SRR492407.280810111	100.00	47	0	0	55	101	73483	73529	4e-20	87.9
SRR492407.281146521	98.73	79	1	0	1	79	96484	96562	3e-36	141
SRR492407.281146521	96.55	29	0	1	73	101	127954	127927	6e-08	47.3
SRR492407.28174421	100.00	57	0	0	1	57	92312	92368	1e-25	106
SRR492407.28174421	100.00	43	0	0	59	101	51807	51849	6e-18	80.5
SRR492407.282402762	100.00	56	0	0	1	56	98661	98606	4e-25	104
SRR492407.282402762	100.00	43	0	0	59	101	10621	10663	6e-18	80.5
SRR492407.284527531	100.00	45	0	0	1	45	87479	87435	5e-19	84.2
SRR492407.284527531	98.55	69	1	0	27	95	39665	39597	1e-30	122
SRR492407.285398461	100.00	57	0	0	1	57	84227	84171	1e-25	106
SRR492407.285398461	100.00	44	0	0	58	101	1	44	2e-18	82.4
SRR492407.285472312	100.00	64	0	0	1	64	109632	109695	1e-29	119
SRR492407.285472312	97.78	45	1	0	57	101	98292	98336	2e-17	78.7
SRR492407.285591722	100.00	60	0	0	1	60	115508	115449	2e-27	111
SRR492407.285591722	100.00	45	0	0	57	101	84567	84611	5e-19	84.2
SRR492407.285805132	100.00	82	0	0	1	82	94470	94389	1e-39	152
SRR492407.285805132	100.00	20	0	0	82	101	9164	9145	4e-05	38.1
SRR492407.285880292	100.00	52	0	0	1	52	28519	28570	6e-23	97.1
SRR492407.285880292	92.86	28	1	1	58	85	127575	127601	1e-05	39.9
SRR492407.28603921	100.00	44	0	0	1	44	95319	95362	2e-18	82.4
SRR492407.28603921	100.00	55	0	0	47	101	102088	102142	1e-24	102
SRR492407.286202101	97.30	74	0	2	1	72	68497	68424	3e-31	124
SRR492407.286202101	100.00	42	0	0	60	101	68531	68572	2e-17	78.7
SRR492407.286202102	98.82	85	1	0	1	85	68615	68531	1e-39	152
SRR492407.286202102	93.55	31	0	2	73	101	68424	68454	2e-07	45.4
SRR492407.286320841	100.00	41	0	0	1	41	52847	52807	8e-17	76.8
SRR492407.286320841	100.00	65	0	0	37	101	51971	52035	4e-30	121
SRR492407.287228532	100.00	65	0	0	1	65	76418	76482	4e-30	121
SRR492407.287228532	100.00	37	0	0	65	101	60581	60545	1e-14	69.4
SRR492407.288480882	100.00	65	0	0	1	65	124412	124476	4e-30	121
SRR492407.288480882	100.00	37	0	0	65	101	101545	101509	1e-14	69.4
SRR492407.28850141	100.00	69	0	0	1	69	109284	109216	2e-32	128
SRR492407.28850141	97.14	35	1	0	65	99	103571	103605	8e-12	60.2
SRR492407.289411921	94.12	68	2	2	1	67	87823	87757	1e-24	102
SRR492407.289411921	100.00	55	0	0	47	101	87757	87811	1e-24	102
SRR492407.289712591	98.70	77	1	0	1	77	84812	84736	4e-35	137
SRR492407.289712591	96.97	33	1	0	69	101	84974	84942	1e-10	56.5
SRR492407.29043302	100.00	94	0	0	1	94	9595	9688	3e-46	174
SRR492407.29043302	88.24	34	3	1	68	101	8088	8120	1e-05	39.9
SRR492407.292756561	100.00	46	0	0	1	46	35093	35048	1e-19	86.1
SRR492407.292756561	98.36	61	1	0	41	101	34802	34862	3e-26	108
SRR492407.293008121	100.00	47	0	0	1	47	6495	6541	4e-20	87.9
SRR492407.293008121	98.36	61	0	1	41	101	6555	6496	1e-25	106
SRR492407.293337861	100.00	45	0	0	1	45	73001	72957	5e-19	84.2
SRR492407.293337861	100.00	58	0	0	44	101	25854	25911	3e-26	108
SRR492407.293366701	97.62	84	2	0	1	84	92981	92898	2e-37	145
SRR492407.293366701	100.00	27	0	0	75	101	92987	93013	5e-09	51.0
SRR492407.293603851	100.00	74	0	0	1	74	15733	15806	4e-35	137
SRR492407.293603851	100.00	26	0	0	76	101	109447	109422	2e-08	49.1
SRR492407.293974232	100.00	43	0	0	1	43	59218	59260	6e-18	80.5
SRR492407.293974232	100.00	59	0	0	43	101	61892	61834	8e-27	110
SRR492407.294437162	100.00	35	0	0	1	35	100785	100751	2e-13	65.8
SRR492407.294437162	96.36	55	2	0	30	84	100809	100863	3e-21	91.6
SRR492407.295541791	100.00	80	0	0	1	80	104838	104759	2e-38	148
SRR492407.295541791	100.00	25	0	0	77	101	87917	87893	6e-08	47.3
SRR492407.295679391	93.94	33	2	0	1	33	101927	101959	5e-09	51.0
SRR492407.295679391	96.00	25	1	0	77	101	102001	102025	3e-06	41.7
SRR492407.295679392	89.29	56	5	1	1	55	102171	102116	1e-14	69.4
SRR492407.295679392	100.00	20	0	0	79	98	102078	102059	4e-05	38.1
SRR492407.296693342	100.00	57	0	0	1	57	89572	89516	1e-25	106
SRR492407.296693342	100.00	43	0	0	59	101	25945	25903	6e-18	80.5
SRR492407.296858412	100.00	43	0	0	1	43	102535	102493	6e-18	80.5
SRR492407.296858412	94.37	71	1	2	31	101	92857	92924	1e-25	106
SRR492407.297139861	88.89	72	4	4	1	70	32379	32310	1e-19	86.1
SRR492407.297139861	100.00	60	0	0	42	101	32310	32369	2e-27	111
SRR492407.297156591	100.00	57	0	0	1	57	12518	12462	1e-25	106
SRR492407.297156591	97.83	46	0	1	56	101	67104	67060	2e-17	78.7
SRR492407.299425171	90.41	73	7	0	1	73	109658	109730	6e-23	97.1
SRR492407.299425171	100.00	27	0	0	75	101	109761	109787	5e-09	51.0
SRR492407.299919141	100.00	44	0	0	1	44	94854	94897	2e-18	82.4
SRR492407.299919141	100.00	56	0	0	46	101	48839	48784	4e-25	104
SRR492407.30006421	100.00	56	0	0	1	56	20263	20318	4e-25	104
SRR492407.30006421	92.59	27	2	0	75	101	27571	27597	1e-05	39.9
SRR492407.30078131	100.00	55	0	0	1	55	98719	98773	1e-24	102
SRR492407.30078131	100.00	46	0	0	56	101	83881	83926	1e-19	86.1
SRR492407.302775302	100.00	79	0	0	1	79	75798	75720	6e-38	147
SRR492407.302775302	100.00	21	0	0	81	101	106640	106660	1e-05	39.9
SRR492407.303338581	100.00	41	0	0	1	41	100119	100159	8e-17	76.8
SRR492407.303338581	100.00	64	0	0	38	101	100100	100037	1e-29	119
SRR492407.303630912	100.00	56	0	0	1	56	84226	84171	4e-25	104
SRR492407.303630912	100.00	45	0	0	57	101	1	45	5e-19	84.2
SRR492407.304225621	100.00	49	0	0	1	49	102636	102684	3e-21	91.6
SRR492407.304225621	100.00	50	0	0	52	101	41227	41276	8e-22	93.5
SRR492407.304604971	98.57	70	0	1	1	69	94752	94821	1e-30	122
SRR492407.304604971	97.30	37	0	1	65	101	54418	54453	2e-12	62.1
SRR492407.30469511	98.25	57	1	0	1	57	7159	7215	5e-24	100
SRR492407.30469511	100.00	43	0	0	59	101	103243	103285	6e-18	80.5
SRR492407.305540242	100.00	53	0	0	1	53	84223	84171	2e-23	99.0
SRR492407.305540242	100.00	48	0	0	54	101	1	48	1e-20	89.8
SRR492407.306296821	100.00	83	0	0	1	83	40223	40141	4e-40	154
SRR492407.306296821	100.00	21	0	0	81	101	37630	37610	1e-05	39.9
SRR492407.307059192	100.00	57	0	0	1	57	17042	16986	1e-25	106
SRR492407.307059192	100.00	48	0	0	54	101	25936	25889	1e-20	89.8
SRR492407.307616812	100.00	60	0	0	1	60	38894	38835	2e-27	111
SRR492407.307616812	100.00	46	0	0	56	101	39010	39055	1e-19	86.1
SRR492407.308375891	100.00	61	0	0	1	61	117037	116977	6e-28	113
SRR492407.308375891	100.00	40	0	0	62	101	61123	61084	3e-16	75.0
SRR492407.308553072	100.00	57	0	0	1	57	48353	48297	1e-25	106
SRR492407.308553072	100.00	44	0	0	58	101	47968	48011	2e-18	82.4
SRR492407.309731232	100.00	84	0	0	1	84	93661	93744	1e-40	156
SRR492407.309731232	86.84	38	3	2	58	95	42002	41967	3e-06	41.7
SRR492407.309796031	98.86	88	1	0	1	88	64686	64599	3e-41	158
SRR492407.309796031	100.00	20	0	0	82	101	64416	64435	4e-05	38.1
SRR492407.309812232	100.00	63	0	0	1	63	101730	101668	5e-29	117
SRR492407.309812232	97.37	38	0	1	64	101	70715	70751	6e-13	63.9
SRR492407.31022532	100.00	73	0	0	1	73	115251	115179	1e-34	135
SRR492407.31022532	97.14	35	1	0	67	101	114989	115023	8e-12	60.2
SRR492407.31074212	100.00	38	0	0	1	38	78664	78701	4e-15	71.3
SRR492407.31074212	98.59	71	1	0	31	101	78621	78551	8e-32	126
SRR492407.311611391	100.00	36	0	0	1	36	27669	27704	5e-14	67.6
SRR492407.311611391	95.08	61	3	0	41	101	69423	69483	6e-23	97.1
SRR492407.311611392	93.33	60	2	2	5	64	99981	99924	4e-20	87.9
SRR492407.311611392	96.77	31	1	0	67	97	29832	29802	1e-09	52.8
SRR492407.311853082	100.00	60	0	0	1	60	76662	76603	2e-27	111
SRR492407.311853082	100.00	42	0	0	60	101	31078	31119	2e-17	78.7
SRR492407.312566781	98.90	91	1	0	1	91	115777	115687	6e-43	163
SRR492407.312566781	100.00	25	0	0	77	101	119600	119576	6e-08	47.3
SRR492407.312835631	100.00	49	0	0	1	49	115255	115207	3e-21	91.6
SRR492407.312835631	100.00	51	0	0	51	101	114517	114567	2e-22	95.3
SRR492407.312978502	100.00	81	0	0	1	81	113993	113913	5e-39	150
SRR492407.312978502	100.00	20	0	0	82	101	103250	103231	4e-05	38.1
SRR492407.314617101	100.00	57	0	0	1	57	12518	12462	1e-25	106
SRR492407.314617101	97.83	46	0	1	56	101	67104	67060	2e-17	78.7
SRR492407.315522501	96.67	60	2	0	1	60	28223	28282	5e-24	100
SRR492407.315522501	100.00	55	0	0	47	101	28494	28440	1e-24	102
SRR492407.315522502	100.00	59	0	0	1	59	28436	28494	8e-27	110
SRR492407.315522502	96.43	56	2	0	46	101	28282	28227	8e-22	93.5
SRR492407.315924221	98.39	62	1	0	1	62	46451	46512	8e-27	110
SRR492407.315924221	97.62	42	1	0	60	101	46544	46503	1e-15	73.1
SRR492407.31695202	100.00	78	0	0	1	78	91123	91200	2e-37	145
SRR492407.31695202	90.91	33	2	1	69	101	93198	93167	8e-07	43.6
SRR492407.317345911	100.00	74	0	0	1	74	103681	103608	4e-35	137
SRR492407.317345911	100.00	25	0	0	77	101	117674	117650	6e-08	47.3
SRR492407.317858722	100.00	39	0	0	1	39	103801	103763	1e-15	73.1
SRR492407.317858722	100.00	62	0	0	40	101	42357	42296	2e-28	115
SRR492407.318143281	98.63	73	1	0	1	73	38555	38627	6e-33	130
SRR492407.318143281	96.67	30	0	1	72	101	77187	77215	2e-08	49.1
SRR492407.319746162	100.00	30	0	0	1	30	109933	109904	1e-10	56.5
SRR492407.319746162	100.00	75	0	0	27	101	109639	109713	1e-35	139
SRR492407.320270621	100.00	80	0	0	1	80	105655	105734	2e-38	148
SRR492407.320270621	100.00	26	0	0	76	101	105649	105624	2e-08	49.1
SRR492407.32068851	96.88	32	1	0	1	32	63465	63496	4e-10	54.7
SRR492407.32068851	100.00	81	0	0	21	101	63456	63376	5e-39	150
SRR492407.321258481	95.56	45	1	1	1	44	23372	23416	4e-15	71.3
SRR492407.321258481	100.00	70	0	0	32	101	23343	23274	6e-33	130
SRR492407.321459862	100.00	84	0	0	1	84	104545	104462	1e-40	156
SRR492407.321459862	100.00	20	0	0	82	101	95354	95373	4e-05	38.1
SRR492407.321865321	100.00	57	0	0	1	57	104655	104711	1e-25	106
SRR492407.321865321	100.00	48	0	0	54	101	103750	103703	1e-20	89.8
SRR492407.322825332	100.00	49	0	0	1	49	101618	101666	3e-21	91.6
SRR492407.322825332	100.00	58	0	0	44	101	103142	103085	3e-26	108
SRR492407.323399202	100.00	46	0	0	1	46	108417	108462	1e-19	86.1
SRR492407.323399202	100.00	56	0	0	46	101	47158	47213	4e-25	104
SRR492407.325366571	100.00	84	0	0	1	84	72214	72297	1e-40	156
SRR492407.325366571	96.15	26	1	0	76	101	62787	62762	8e-07	43.6
SRR492407.325491481	95.35	43	2	0	1	43	36771	36813	1e-14	69.4
SRR492407.325491481	100.00	65	0	0	37	101	107810	107874	4e-30	121
SRR492407.325570111	100.00	89	0	0	1	89	6942	6854	2e-43	165
SRR492407.325570111	92.31	26	2	0	75	100	8750	8725	4e-05	38.1
SRR492407.326177752	97.78	45	0	1	1	45	95453	95410	8e-17	76.8
SRR492407.326177752	98.46	65	1	0	37	101	95521	95585	2e-28	115
SRR492407.327594602	88.89	45	4	1	2	45	102160	102116	4e-10	54.7
SRR492407.327594602	93.55	31	2	0	69	99	102078	102048	6e-08	47.3
SRR492407.327753032	100.00	29	0	0	1	29	201	173	4e-10	54.7
SRR492407.327753032	95.65	69	3	0	32	100	180	112	2e-27	111
SRR492407.328320902	100.00	27	0	0	1	27	16594	16620	5e-09	51.0
SRR492407.328320902	100.00	80	0	0	22	101	16584	16505	2e-38	148
SRR492407.328773511	100.00	40	0	0	1	40	104331	104292	3e-16	75.0
SRR492407.328773511	100.00	66	0	0	36	101	103769	103834	1e-30	122
SRR492407.329112572	100.00	76	0	0	1	76	61265	61190	3e-36	141
SRR492407.329112572	96.77	31	0	1	71	101	777	806	5e-09	51.0
SRR492407.329846422	100.00	23	0	0	1	23	109973	109995	8e-07	43.6
SRR492407.329846422	100.00	82	0	0	20	101	110112	110031	1e-39	152
SRR492407.329960972	100.00	49	0	0	1	49	99282	99234	3e-21	91.6
SRR492407.329960972	100.00	58	0	0	44	101	89268	89325	3e-26	108
SRR492407.330944902	98.70	77	0	1	1	77	90685	90760	1e-34	135
SRR492407.330944902	90.00	50	4	1	53	101	90597	90548	6e-13	63.9
SRR492407.331575151	100.00	62	0	0	1	62	86903	86842	2e-28	115
SRR492407.331575151	100.00	37	0	0	65	101	19016	18980	1e-14	69.4
SRR492407.333567962	94.05	84	4	1	1	84	35287	35205	8e-32	126
SRR492407.333567962	82.14	56	6	3	36	90	35204	35256	2e-07	45.4
SRR492407.33375712	100.00	82	0	0	1	82	96952	96871	1e-39	152
SRR492407.33375712	100.00	23	0	0	79	101	97083	97105	8e-07	43.6
SRR492407.334069962	100.00	80	0	0	1	80	109686	109765	2e-38	148
SRR492407.334069962	100.00	21	0	0	81	101	21677	21697	1e-05	39.9
SRR492407.334202721	98.68	76	1	0	1	76	11898	11823	1e-34	135
SRR492407.334202721	100.00	23	0	0	79	101	61746	61768	8e-07	43.6
SRR492407.33465522	100.00	72	0	0	1	72	55005	54934	5e-34	134
SRR492407.33465522	97.06	34	1	0	68	101	54758	54791	3e-11	58.4
SRR492407.334956171	96.15	26	1	0	1	26	18461	18436	8e-07	43.6
SRR492407.334956171	100.00	33	0	0	18	50	18436	18468	2e-12	62.1
SRR492407.334982792	96.88	32	1	0	1	32	109792	109761	4e-10	54.7
SRR492407.334982792	91.04	67	6	0	34	100	109730	109664	3e-21	91.6
SRR492407.335397301	100.00	68	0	0	1	68	90437	90504	8e-32	126
SRR492407.335397301	92.86	42	1	2	60	101	81462	81501	8e-12	60.2
SRR492407.335456281	100.00	34	0	0	1	34	90479	90512	6e-13	63.9
SRR492407.335456281	100.00	67	0	0	35	101	90574	90640	3e-31	124
SRR492407.335913971	100.00	92	0	0	1	92	42709	42800	4e-45	171
SRR492407.335913971	85.71	42	3	2	59	99	98834	98873	3e-06	41.7
SRR492407.336222021	100.00	48	0	0	1	48	72451	72404	1e-20	89.8
SRR492407.336222021	100.00	51	0	0	51	101	100522	100572	2e-22	95.3
SRR492407.33659631	100.00	71	0	0	1	71	56740	56670	2e-33	132
SRR492407.33659631	96.67	30	1	0	72	101	22415	22444	5e-09	51.0
SRR492407.336707461	100.00	38	0	0	1	38	93685	93648	4e-15	71.3
SRR492407.336707461	100.00	64	0	0	38	101	105607	105544	1e-29	119
SRR492407.337379341	100.00	34	0	0	1	34	49885	49918	6e-13	63.9
SRR492407.337379341	98.53	68	0	1	35	101	71232	71165	1e-29	119
SRR492407.337907081	100.00	41	0	0	1	41	123495	123455	8e-17	76.8
SRR492407.337907081	100.00	64	0	0	38	101	123321	123384	1e-29	119
SRR492407.338232051	98.68	76	1	0	1	76	13342	13417	1e-34	135
SRR492407.338232051	100.00	30	0	0	72	101	13446	13475	1e-10	56.5
SRR492407.338529991	100.00	46	0	0	1	46	88246	88201	1e-19	86.1
SRR492407.338529991	96.72	61	2	0	41	101	88187	88247	1e-24	102
SRR492407.338627771	98.80	83	0	1	1	83	95286	95367	6e-38	147
SRR492407.338627771	100.00	28	0	0	74	101	95454	95427	1e-09	52.8
SRR492407.338627772	100.00	85	0	0	1	85	95370	95454	3e-41	158
SRR492407.338627772	96.15	26	0	1	76	101	95367	95343	3e-06	41.7
SRR492407.338745422	100.00	59	0	0	1	59	126597	126539	8e-27	110
SRR492407.338745422	100.00	43	0	0	59	101	107380	107422	6e-18	80.5
SRR492407.338784031	100.00	29	0	0	1	29	68464	68492	4e-10	54.7
SRR492407.338784031	100.00	79	0	0	23	101	68699	68621	6e-38	147
SRR492407.340757061	100.00	47	0	0	1	47	43075	43121	4e-20	87.9
SRR492407.340757061	100.00	53	0	0	49	101	110323	110375	2e-23	99.0
SRR492407.341302931	100.00	54	0	0	1	54	15085	15138	5e-24	100
SRR492407.341302931	100.00	45	0	0	57	101	122931	122975	5e-19	84.2
SRR492407.341302932	100.00	54	0	0	1	54	122984	122931	5e-24	100
SRR492407.341302932	100.00	45	0	0	57	101	15138	15094	5e-19	84.2
SRR492407.341616581	100.00	42	0	0	1	42	115698	115739	2e-17	78.7
SRR492407.341616581	100.00	65	0	0	37	101	115052	115116	4e-30	121
SRR492407.341947722	100.00	26	0	0	1	26	32479	32504	2e-08	49.1
SRR492407.341947722	100.00	79	0	0	21	99	32449	32371	6e-38	147
SRR492407.342518021	100.00	40	0	0	1	40	108349	108310	3e-16	75.0
SRR492407.342518021	98.41	63	0	1	40	101	71511	71449	8e-27	110
SRR492407.343288211	97.50	40	1	0	1	40	17501	17462	1e-14	69.4
SRR492407.343288211	100.00	71	0	0	31	101	108706	108636	2e-33	132
SRR492407.34418691	100.00	66	0	0	1	66	77324	77389	1e-30	122
SRR492407.34418691	100.00	35	0	0	67	101	81596	81562	2e-13	65.8
SRR492407.345645971	85.11	47	7	0	1	47	37286	37332	2e-08	49.1
SRR492407.345645971	97.73	88	2	0	14	101	37332	37245	1e-39	152
SRR492407.345890262	100.00	35	0	0	1	35	25902	25936	2e-13	65.8
SRR492407.345890262	100.00	70	0	0	32	101	16986	17055	6e-33	130
SRR492407.34604642	100.00	63	0	0	1	63	62056	61994	5e-29	117
SRR492407.34604642	100.00	39	0	0	63	101	90447	90409	1e-15	73.1
SRR492407.346213781	100.00	74	0	0	1	74	34715	34788	4e-35	137
SRR492407.346213781	100.00	26	0	0	76	101	100333	100358	2e-08	49.1
SRR492407.346473531	100.00	33	0	0	1	33	9707	9675	2e-12	62.1
SRR492407.346473531	100.00	66	0	0	36	101	9688	9623	1e-30	122
SRR492407.346815271	100.00	64	0	0	1	64	107237	107300	1e-29	119
SRR492407.346815271	100.00	37	0	0	65	101	60956	60992	1e-14	69.4
SRR492407.347344651	100.00	76	0	0	1	76	79769	79694	3e-36	141
SRR492407.347344651	100.00	28	0	0	74	101	79775	79802	1e-09	52.8
SRR492407.347583141	100.00	65	0	0	1	65	58221	58285	4e-30	121
SRR492407.347583141	97.56	41	1	0	61	101	107551	107591	4e-15	71.3
SRR492407.349043761	93.06	72	4	1	1	71	109388	109317	4e-25	104
SRR492407.349043761	96.15	26	1	0	76	101	109385	109360	8e-07	43.6
SRR492407.349043762	96.30	27	1	0	1	27	109359	109385	2e-07	45.4
SRR492407.349043762	92.96	71	4	1	32	101	109317	109387	1e-24	102
SRR492407.349472081	91.11	45	4	0	1	45	10594	10550	2e-12	62.1
SRR492407.349472081	93.94	33	2	0	69	101	102938	102970	5e-09	51.0
SRR492407.349806422	100.00	45	0	0	1	45	110314	110270	5e-19	84.2
SRR492407.349806422	100.00	65	0	0	37	101	109836	109900	4e-30	121
SRR492407.350437902	100.00	26	0	0	1	26	102026	102001	2e-08	49.1
SRR492407.350437902	96.55	29	1	0	70	98	101959	101931	2e-08	49.1
SRR492407.350937971	100.00	71	0	0	1	71	104038	103968	2e-33	132
SRR492407.350937971	100.00	35	0	0	67	101	104071	104105	2e-13	65.8
SRR492407.351742721	98.55	69	1	0	1	69	92017	92085	1e-30	122
SRR492407.351742721	100.00	44	0	0	58	101	92012	91969	2e-18	82.4
SRR492407.352802962	100.00	86	0	0	1	86	85719	85634	8e-42	159
SRR492407.352802962	90.32	31	1	2	67	97	58819	58791	1e-05	39.9
SRR492407.353706001	100.00	55	0	0	1	55	127275	127221	1e-24	102
SRR492407.353706001	100.00	37	0	0	55	91	95943	95907	1e-14	69.4
SRR492407.353706002	100.00	36	0	0	1	36	95908	95943	5e-14	67.6
SRR492407.353706002	100.00	55	0	0	36	90	127221	127275	1e-24	102
SRR492407.354714462	96.00	25	1	0	1	25	688	664	3e-06	41.7
SRR492407.354714462	100.00	42	0	0	26	67	654	613	2e-17	78.7
SRR492407.355272711	100.00	70	0	0	1	70	84240	84171	6e-33	130
SRR492407.355272711	100.00	31	0	0	71	101	1	31	3e-11	58.4
SRR492407.356238601	100.00	50	0	0	1	50	98659	98610	8e-22	93.5
SRR492407.356238601	100.00	53	0	0	47	99	104099	104151	2e-23	99.0
SRR492407.357754991	100.00	62	0	0	1	62	41251	41312	2e-28	115
SRR492407.357754991	100.00	44	0	0	58	101	41535	41492	2e-18	82.4
SRR492407.35830252	100.00	64	0	0	1	64	86093	86156	1e-29	119
SRR492407.35830252	100.00	36	0	0	66	101	98742	98777	5e-14	67.6
SRR492407.359404262	100.00	65	0	0	1	65	38566	38630	4e-30	121
SRR492407.359404262	100.00	36	0	0	66	101	107363	107328	5e-14	67.6
SRR492407.360144572	100.00	67	0	0	1	67	81217	81151	3e-31	124
SRR492407.360144572	100.00	35	0	0	67	101	43872	43838	2e-13	65.8
SRR492407.360525402	100.00	25	0	0	1	25	45220	45196	6e-08	47.3
SRR492407.360525402	98.77	81	1	0	21	101	45206	45126	2e-37	145
SRR492407.360591021	100.00	63	0	0	1	63	73178	73240	5e-29	117
SRR492407.360591021	100.00	37	0	0	65	101	121209	121173	1e-14	69.4
SRR492407.360632051	100.00	51	0	0	1	51	106519	106469	2e-22	95.3
SRR492407.360632051	100.00	54	0	0	48	101	106536	106589	5e-24	100
SRR492407.360724051	95.45	44	2	0	1	44	15518	15475	4e-15	71.3
SRR492407.360724051	100.00	73	0	0	29	101	15475	15547	1e-34	135
SRR492407.360836111	100.00	36	0	0	1	36	108771	108736	5e-14	67.6
SRR492407.360836111	100.00	66	0	0	36	101	108720	108655	1e-30	122
SRR492407.361500302	100.00	64	0	0	1	64	35037	34974	1e-29	119
SRR492407.361500302	100.00	44	0	0	58	101	34865	34908	2e-18	82.4
SRR492407.361607632	100.00	76	0	0	1	76	88619	88544	3e-36	141
SRR492407.361607632	100.00	23	0	0	79	101	92616	92594	8e-07	43.6
SRR492407.362094601	98.55	69	1	0	1	69	107507	107439	1e-30	122
SRR492407.362094601	94.44	36	2	0	66	101	107101	107136	1e-10	56.5
SRR492407.362132141	98.36	61	1	0	1	61	88100	88160	3e-26	108
SRR492407.362132141	97.96	49	1	0	53	101	88366	88318	1e-19	86.1
SRR492407.362252452	100.00	73	0	0	1	73	97063	97135	1e-34	135
SRR492407.362252452	96.30	27	1	0	75	101	98411	98385	2e-07	45.4
SRR492407.363468722	100.00	70	0	0	1	70	97162	97231	6e-33	130
SRR492407.363468722	100.00	30	0	0	72	101	6622	6651	1e-10	56.5
SRR492407.363682761	100.00	50	0	0	1	50	96324	96373	8e-22	93.5
SRR492407.363682761	100.00	52	0	0	50	101	95865	95916	6e-23	97.1
SRR492407.363942251	100.00	68	0	0	1	68	87091	87024	8e-32	126
SRR492407.363942251	100.00	41	0	0	61	101	87148	87188	8e-17	76.8
SRR492407.364073331	93.33	30	2	0	1	30	54829	54800	2e-07	45.4
SRR492407.364073331	97.56	41	1	0	56	96	54511	54471	4e-15	71.3
SRR492407.364582791	97.73	44	0	1	1	43	103748	103705	3e-16	75.0
SRR492407.364582791	100.00	65	0	0	37	101	103366	103430	4e-30	121
SRR492407.364764842	100.00	88	0	0	1	88	123322	123235	6e-43	163
SRR492407.364764842	100.00	21	0	0	81	101	123338	123358	1e-05	39.9
SRR492407.365073022	100.00	62	0	0	1	62	47062	47001	2e-28	115
SRR492407.365073022	100.00	38	0	0	64	101	108857	108820	4e-15	71.3
SRR492407.365184812	100.00	47	0	0	1	47	54039	54085	4e-20	87.9
SRR492407.365184812	96.77	62	2	0	37	98	54025	53964	4e-25	104
SRR492407.365441742	100.00	70	0	0	1	70	29022	28953	6e-33	130
SRR492407.365441742	100.00	20	0	0	82	101	28981	28962	4e-05	38.1
SRR492407.366247101	96.15	26	1	0	1	26	89518	89543	8e-07	43.6
SRR492407.366247101	98.70	77	1	0	25	101	89550	89474	4e-35	137
SRR492407.366635092	100.00	72	0	0	1	72	104993	104922	5e-34	134
SRR492407.366635092	100.00	27	0	0	75	101	89978	89952	5e-09	51.0
SRR492407.367590342	100.00	69	0	0	1	69	102842	102910	2e-32	128
SRR492407.367590342	100.00	30	0	0	72	101	78077	78106	1e-10	56.5
SRR492407.367612981	100.00	71	0	0	1	71	109038	108968	2e-33	132
SRR492407.367612981	92.68	41	1	2	63	101	93271	93231	3e-11	58.4
SRR492407.369163082	100.00	60	0	0	1	60	14649	14590	2e-27	111
SRR492407.369163082	100.00	45	0	0	57	101	86667	86711	5e-19	84.2
SRR492407.369423211	100.00	33	0	0	1	33	9707	9675	2e-12	62.1
SRR492407.369423211	100.00	66	0	0	36	101	9688	9623	1e-30	122
SRR492407.369957551	100.00	71	0	0	1	71	84089	84159	2e-33	132
SRR492407.369957551	97.06	34	1	0	68	101	62	29	3e-11	58.4
SRR492407.369957552	100.00	80	0	0	1	80	84250	84171	2e-38	148
SRR492407.369957552	100.00	21	0	0	81	101	1	21	1e-05	39.9
SRR492407.370483222	100.00	68	0	0	1	68	43729	43796	8e-32	126
SRR492407.370483222	100.00	31	0	0	71	101	84974	85004	3e-11	58.4
SRR492407.371259091	100.00	35	0	0	1	35	107963	107929	2e-13	65.8
SRR492407.371259091	100.00	70	0	0	32	101	23206	23275	6e-33	130
SRR492407.372491531	100.00	40	0	0	1	40	109711	109750	3e-16	75.0
SRR492407.372491531	100.00	66	0	0	36	101	110000	109935	1e-30	122
SRR492407.37284972	100.00	80	0	0	1	80	8243	8322	2e-38	148
SRR492407.37284972	97.06	34	1	0	68	101	4397	4430	3e-11	58.4
SRR492407.373055662	100.00	73	0	0	1	73	93617	93689	1e-34	135
SRR492407.373055662	100.00	33	0	0	69	101	119433	119401	2e-12	62.1
SRR492407.37391111	100.00	45	0	0	1	45	44968	45012	5e-19	84.2
SRR492407.37391111	100.00	61	0	0	41	101	45039	44979	6e-28	113
SRR492407.374424911	98.67	75	0	1	1	74	58226	58152	2e-33	132
SRR492407.374424911	95.24	42	1	1	60	101	73033	72993	2e-13	65.8
SRR492407.374424912	100.00	59	0	0	1	59	25912	25854	8e-27	110
SRR492407.374424912	100.00	44	0	0	58	101	72957	73000	2e-18	82.4
SRR492407.374481551	96.55	87	3	0	1	87	107871	107785	2e-37	145
SRR492407.374481551	97.87	47	1	0	55	101	107785	107739	2e-18	82.4
SRR492407.374512762	100.00	30	0	0	1	30	31	2	1e-10	56.5
SRR492407.374512762	100.00	62	0	0	32	93	84171	84232	2e-28	115
SRR492407.374542182	100.00	66	0	0	1	66	63517	63582	1e-30	122
SRR492407.374542182	100.00	34	0	0	68	101	50647	50614	6e-13	63.9
SRR492407.375090832	100.00	57	0	0	1	57	92639	92583	1e-25	106
SRR492407.375090832	100.00	42	0	0	60	101	13391	13432	2e-17	78.7
SRR492407.375691741	100.00	65	0	0	1	65	90855	90919	4e-30	121
SRR492407.375691741	100.00	52	0	0	50	101	91055	91004	6e-23	97.1
SRR492407.375691742	100.00	91	0	0	1	91	90965	91055	1e-44	169
SRR492407.375691742	100.00	24	0	0	76	99	90919	90896	2e-07	45.4
SRR492407.375959951	98.39	62	1	0	1	62	20823	20762	8e-27	110
SRR492407.375959951	95.65	23	1	0	67	89	66700	66722	4e-05	38.1
SRR492407.376056302	100.00	73	0	0	1	73	106496	106568	1e-34	135
SRR492407.376056302	96.15	26	1	0	76	101	117996	118021	8e-07	43.6
SRR492407.376697301	100.00	64	0	0	1	64	73020	72957	1e-29	119
SRR492407.376697301	100.00	39	0	0	63	101	25854	25892	1e-15	73.1
SRR492407.376697302	100.00	78	0	0	1	78	25931	25854	2e-37	145
SRR492407.376697302	96.00	25	1	0	77	101	72957	72981	3e-06	41.7
SRR492407.376773202	96.00	25	1	0	3	27	688	664	3e-06	41.7
SRR492407.376773202	100.00	42	0	0	28	69	654	613	2e-17	78.7
SRR492407.376810991	100.00	72	0	0	1	72	84804	84875	5e-34	134
SRR492407.376810991	100.00	35	0	0	67	101	84838	84872	2e-13	65.8
SRR492407.376895692	100.00	35	0	0	1	35	54544	54510	2e-13	65.8
SRR492407.376895692	100.00	72	0	0	30	101	53660	53589	5e-34	134
SRR492407.376951951	100.00	53	0	0	1	53	109756	109808	2e-23	99.0
SRR492407.376951951	100.00	48	0	0	54	101	95358	95405	1e-20	89.8
SRR492407.376971691	96.43	56	2	0	1	56	14695	14750	8e-22	93.5
SRR492407.376971691	98.15	54	1	0	48	101	119744	119691	2e-22	95.3
SRR492407.377660241	98.92	93	0	1	1	93	99292	99383	2e-43	165
SRR492407.377660241	100.00	20	0	0	82	101	2982	2963	4e-05	38.1
SRR492407.377934851	97.53	81	0	2	1	81	96019	95941	4e-35	137
SRR492407.377934851	100.00	28	0	0	74	101	86941	86968	1e-09	52.8
SRR492407.378882122	100.00	71	0	0	1	71	107123	107053	2e-33	132
SRR492407.378882122	96.88	32	0	1	70	101	85222	85252	1e-09	52.8
SRR492407.378893681	97.30	74	1	1	1	73	11820	11893	3e-31	124
SRR492407.378893681	100.00	40	0	0	62	101	11783	11744	3e-16	75.0
SRR492407.379074111	100.00	57	0	0	1	57	96568	96512	1e-25	106
SRR492407.379074111	100.00	43	0	0	59	101	89030	89072	6e-18	80.5
SRR492407.379661792	100.00	77	0	0	1	77	118838	118762	8e-37	143
SRR492407.379661792	97.50	40	0	1	62	101	51132	51094	5e-14	67.6
SRR492407.379757541	96.00	25	1	0	1	25	53694	53718	3e-06	41.7
SRR492407.379757541	100.00	85	0	0	17	101	53946	53862	3e-41	158
SRR492407.379810751	100.00	53	0	0	1	53	78208	78260	2e-23	99.0
SRR492407.379810751	100.00	48	0	0	54	101	80172	80219	1e-20	89.8
SRR492407.380634212	96.00	25	1	0	3	27	688	664	3e-06	41.7
SRR492407.380634212	100.00	42	0	0	28	69	654	613	2e-17	78.7
SRR492407.380678741	100.00	46	0	0	1	46	37041	37086	1e-19	86.1
SRR492407.380678741	100.00	54	0	0	48	101	98806	98859	5e-24	100
SRR492407.381252362	100.00	76	0	0	1	76	103413	103338	3e-36	141
SRR492407.381252362	100.00	24	0	0	78	101	88525	88548	2e-07	45.4
SRR492407.38137861	94.87	39	2	0	1	39	56092	56054	2e-12	62.1
SRR492407.38137861	98.39	62	1	0	40	101	55780	55841	8e-27	110
SRR492407.381397871	100.00	41	0	0	1	41	27664	27704	8e-17	76.8
SRR492407.381397871	94.64	56	3	0	46	101	69423	69478	4e-20	87.9
SRR492407.381629831	100.00	72	0	0	1	72	93672	93743	5e-34	134
SRR492407.381629831	86.49	37	4	1	47	83	42002	41967	1e-05	39.9
SRR492407.381864102	92.31	26	2	0	2	27	86681	86706	4e-05	38.1
SRR492407.381864102	92.54	67	5	0	29	95	86727	86793	6e-23	97.1
SRR492407.382206671	100.00	66	0	0	1	66	97718	97653	1e-30	122
SRR492407.382206671	100.00	34	0	0	68	101	25646	25613	6e-13	63.9
SRR492407.383339362	100.00	60	0	0	1	60	121	180	2e-27	111
SRR492407.383339362	97.14	35	0	1	64	97	173	207	3e-11	58.4
SRR492407.383874951	100.00	88	0	0	1	88	40233	40320	6e-43	163
SRR492407.383874951	100.00	20	0	0	82	101	40444	40425	4e-05	38.1
SRR492407.383954272	100.00	27	0	0	1	27	25880	25854	5e-09	51.0
SRR492407.383954272	97.26	73	1	1	26	98	72957	73028	1e-30	122
SRR492407.386015831	100.00	58	0	0	1	58	61042	60985	3e-26	108
SRR492407.386015831	100.00	45	0	0	57	101	61257	61213	5e-19	84.2
SRR492407.386015832	100.00	56	0	0	1	56	61202	61257	4e-25	104
SRR492407.386015832	100.00	46	0	0	55	100	60985	61030	1e-19	86.1
SRR492407.386675072	100.00	61	0	0	1	61	94974	95034	6e-28	113
SRR492407.386675072	97.50	40	1	0	62	101	95570	95609	1e-14	69.4
SRR492407.389598921	100.00	49	0	0	1	49	84219	84171	3e-21	91.6
SRR492407.389598921	100.00	52	0	0	50	101	1	52	6e-23	97.1
SRR492407.38996241	100.00	38	0	0	1	38	115702	115739	4e-15	71.3
SRR492407.38996241	100.00	69	0	0	33	101	115052	115120	2e-32	128
SRR492407.39016742	100.00	69	0	0	1	69	95108	95040	2e-32	128
SRR492407.39016742	100.00	30	0	0	72	101	66140	66169	1e-10	56.5
SRR492407.391253011	96.67	30	1	0	1	30	111617	111646	5e-09	51.0
SRR492407.391253011	98.65	74	1	0	28	101	111662	111589	2e-33	132
SRR492407.392007951	96.30	27	1	0	1	27	92818	92792	2e-07	45.4
SRR492407.392007951	98.25	57	1	0	22	78	92792	92848	5e-24	100
SRR492407.392007952	100.00	52	0	0	1	52	92843	92792	6e-23	97.1
SRR492407.392007952	96.30	27	1	0	47	73	92792	92818	2e-07	45.4
SRR492407.39252852	95.06	81	3	1	1	80	77444	77364	8e-32	126
SRR492407.39252852	94.59	37	1	1	66	101	93539	93575	1e-10	56.5
SRR492407.392528972	100.00	23	0	0	1	23	45184	45206	8e-07	43.6
SRR492407.392528972	98.81	84	1	0	18	101	45196	45279	5e-39	150
SRR492407.392704032	97.83	92	2	0	1	92	99900	99809	8e-42	159
SRR492407.392704032	100.00	30	0	0	72	101	99806	99777	1e-10	56.5
SRR492407.394200471	98.72	78	1	0	1	78	91348	91271	1e-35	139
SRR492407.394200471	95.65	23	1	0	79	101	105443	105421	4e-05	38.1
SRR492407.394819462	100.00	67	0	0	1	67	119274	119340	3e-31	124
SRR492407.394819462	100.00	35	0	0	66	100	93731	93765	2e-13	65.8
SRR492407.394877001	100.00	33	0	0	1	33	36086	36054	2e-12	62.1
SRR492407.394877001	100.00	73	0	0	29	101	28247	28319	1e-34	135
SRR492407.394892701	100.00	62	0	0	1	62	115791	115852	2e-28	115
SRR492407.394892701	94.34	53	2	1	49	101	116055	116004	6e-18	80.5
SRR492407.395022971	100.00	76	0	0	1	76	77074	76999	3e-36	141
SRR492407.395022971	100.00	23	0	0	79	101	19843	19821	8e-07	43.6
SRR492407.395683562	100.00	76	0	0	1	76	63746	63821	3e-36	141
SRR492407.395683562	100.00	24	0	0	78	101	66391	66414	2e-07	45.4
SRR492407.395983642	100.00	30	0	0	1	30	202	173	1e-10	56.5
SRR492407.395983642	95.65	69	3	0	33	101	180	112	2e-27	111
SRR492407.3973472	100.00	76	0	0	1	76	58063	57988	3e-36	141
SRR492407.3973472	100.00	23	0	0	79	101	106592	106614	8e-07	43.6
SRR492407.399232392	100.00	73	0	0	1	73	94826	94754	1e-34	135
SRR492407.399232392	100.00	26	0	0	76	101	109382	109357	2e-08	49.1
SRR492407.399393581	96.77	31	1	0	1	31	69460	69490	1e-09	52.8
SRR492407.399393581	90.91	55	4	1	32	85	29776	29830	1e-15	73.1
SRR492407.399393582	91.67	60	4	1	4	62	9120	9179	2e-18	82.4
SRR492407.399393582	90.48	42	3	1	55	95	100022	99981	4e-10	54.7
SRR492407.399589611	96.55	87	3	0	1	87	109859	109945	2e-37	145
SRR492407.399589611	100.00	28	0	0	74	101	109838	109811	1e-09	52.8
SRR492407.399590841	98.59	71	1	0	1	71	105932	105862	8e-32	126
SRR492407.399590841	100.00	42	0	0	60	101	104591	104632	2e-17	78.7
SRR492407.400185881	100.00	74	0	0	1	74	25863	25936	4e-35	137
SRR492407.400185881	100.00	31	0	0	71	101	16986	17016	3e-11	58.4
SRR492407.401480492	100.00	55	0	0	1	55	122691	122745	1e-24	102
SRR492407.401480492	100.00	44	0	0	58	101	49416	49373	2e-18	82.4
SRR492407.402235151	100.00	37	0	0	2	38	120019	119983	1e-14	69.4
SRR492407.402235151	100.00	68	0	0	34	101	119966	120033	8e-32	126
SRR492407.402713052	98.15	54	0	1	1	53	37737	37790	8e-22	93.5
SRR492407.402713052	98.31	59	1	0	43	101	37731	37673	4e-25	104
SRR492407.403238302	100.00	80	0	0	1	80	100622	100701	2e-38	148
SRR492407.403238302	88.24	34	1	2	68	99	6510	6542	4e-05	38.1
SRR492407.404356271	100.00	52	0	0	1	52	10532	10583	6e-23	97.1
SRR492407.404356271	96.15	52	2	0	50	101	10567	10618	1e-19	86.1
SRR492407.405879131	100.00	69	0	0	1	69	99794	99862	2e-32	128
SRR492407.405879131	100.00	32	0	0	70	101	96078	96109	8e-12	60.2
SRR492407.406810651	94.12	34	2	0	1	34	109697	109730	1e-09	52.8
SRR492407.406810651	96.97	66	2	0	36	101	109761	109826	2e-27	111
SRR492407.4075772	100.00	23	0	0	1	23	60128	60106	8e-07	43.6
SRR492407.4075772	100.00	82	0	0	20	101	60131	60212	1e-39	152
SRR492407.408118041	100.00	27	0	0	1	27	51446	51472	5e-09	51.0
SRR492407.408118041	100.00	78	0	0	24	101	51438	51361	2e-37	145
SRR492407.40845641	97.06	34	0	1	1	33	127509	127542	1e-10	56.5
SRR492407.40845641	100.00	81	0	0	21	101	29728	29648	5e-39	150
SRR492407.408671131	100.00	62	0	0	1	62	99800	99861	2e-28	115
SRR492407.408671131	100.00	39	0	0	63	101	100713	100675	1e-15	73.1
SRR492407.408715062	98.57	70	1	0	1	70	98410	98341	3e-31	124
SRR492407.408715062	100.00	30	0	0	72	101	92768	92797	1e-10	56.5
SRR492407.409197541	100.00	34	0	0	1	34	87944	87911	6e-13	63.9
SRR492407.409197541	100.00	67	0	0	35	101	87866	87800	3e-31	124
SRR492407.409383312	100.00	71	0	0	1	71	31749	31679	2e-33	132
SRR492407.409383312	100.00	28	0	0	74	101	9422	9449	1e-09	52.8
SRR492407.409405621	100.00	64	0	0	1	64	1411	1474	1e-29	119
SRR492407.409405621	100.00	38	0	0	64	101	119548	119511	4e-15	71.3
SRR492407.409551052	100.00	53	0	0	1	53	84223	84171	2e-23	99.0
SRR492407.409551052	97.92	48	1	0	54	101	1	48	5e-19	84.2
SRR492407.410577901	100.00	56	0	0	1	56	121811	121756	4e-25	104
SRR492407.410577901	100.00	48	0	0	54	101	90951	90998	1e-20	89.8
SRR492407.410864381	100.00	75	0	0	1	75	84245	84171	1e-35	139
SRR492407.410864381	100.00	26	0	0	76	101	1	26	2e-08	49.1
SRR492407.410938872	100.00	54	0	0	1	54	88051	87998	5e-24	100
SRR492407.410938872	100.00	54	0	0	48	101	94668	94615	5e-24	100
SRR492407.411339431	94.87	39	2	0	1	39	86793	86831	2e-12	62.1
SRR492407.411339431	98.63	73	1	0	29	101	74520	74592	6e-33	130
SRR492407.411622651	100.00	81	0	0	1	81	25934	25854	5e-39	150
SRR492407.411622651	100.00	22	0	0	80	101	72957	72978	3e-06	41.7
SRR492407.411622652	98.63	73	0	1	1	73	73028	72957	2e-32	128
SRR492407.411622652	100.00	30	0	0	72	101	25854	25883	1e-10	56.5
SRR492407.412239141	90.91	66	6	0	1	66	109665	109730	1e-20	89.8
SRR492407.412239141	97.06	34	1	0	68	101	109761	109794	3e-11	58.4
SRR492407.413226891	91.07	56	4	1	1	55	83741	83686	3e-16	75.0
SRR492407.413226891	100.00	61	0	0	41	101	83758	83818	6e-28	113
SRR492407.413326841	85.48	62	8	1	1	61	103506	103445	6e-13	63.9
SRR492407.413326841	100.00	87	0	0	15	101	104435	104349	2e-42	161
SRR492407.414411162	100.00	69	0	0	1	69	109917	109985	2e-32	128
SRR492407.414411162	100.00	31	0	0	71	101	49137	49167	3e-11	58.4
SRR492407.414624251	100.00	43	0	0	1	43	122120	122078	6e-18	80.5
SRR492407.414624251	100.00	56	0	0	46	101	21551	21606	4e-25	104
SRR492407.415126521	100.00	76	0	0	1	76	5181	5256	3e-36	141
SRR492407.415126521	100.00	27	0	0	75	101	108541	108515	5e-09	51.0
SRR492407.415505402	100.00	78	0	0	1	78	96145	96222	2e-37	145
SRR492407.415505402	100.00	21	0	0	81	101	122617	122597	1e-05	39.9
SRR492407.416547341	90.24	82	7	1	1	82	124117	124037	1e-25	106
SRR492407.416547341	100.00	58	0	0	44	101	30182	30125	3e-26	108
SRR492407.416549791	100.00	53	0	0	1	53	95077	95025	2e-23	99.0
SRR492407.416549791	97.78	45	1	0	55	99	87277	87321	2e-17	78.7
SRR492407.416866371	100.00	49	0	0	1	49	103159	103111	3e-21	91.6
SRR492407.416866371	100.00	51	0	0	51	101	84326	84376	2e-22	95.3
SRR492407.417104481	92.50	40	3	0	1	40	87045	87084	3e-11	58.4
SRR492407.417104481	88.10	42	5	0	58	99	87897	87938	5e-09	51.0
SRR492407.417209541	100.00	73	0	0	1	73	89458	89386	1e-34	135
SRR492407.417209541	96.77	31	1	0	71	101	117363	117393	1e-09	52.8
SRR492407.41817491	97.78	45	1	0	1	45	35296	35252	2e-17	78.7
SRR492407.41817491	100.00	63	0	0	39	101	35213	35151	5e-29	117
SRR492407.418281092	100.00	26	0	0	1	26	35598	35573	2e-08	49.1
SRR492407.418281092	100.00	75	0	0	27	101	37031	37105	1e-35	139
SRR492407.418553541	97.22	36	1	0	1	36	88072	88037	2e-12	62.1
SRR492407.418553541	100.00	75	0	0	27	101	108968	109042	1e-35	139
SRR492407.418664322	100.00	66	0	0	1	66	88986	88921	1e-30	122
SRR492407.418664322	100.00	33	0	0	69	101	105439	105471	2e-12	62.1
SRR492407.418676331	94.81	77	3	1	1	77	123250	123175	1e-29	119
SRR492407.418676331	100.00	42	0	0	60	101	34072	34031	2e-17	78.7
SRR492407.418766552	100.00	63	0	0	1	63	109354	109292	5e-29	117
SRR492407.418766552	100.00	37	0	0	65	101	80864	80828	1e-14	69.4
SRR492407.41921381	98.41	63	1	0	1	63	58624	58562	2e-27	111
SRR492407.41921381	88.57	35	3	1	66	100	116019	115986	3e-06	41.7
SRR492407.420059121	95.38	65	3	0	1	65	37616	37552	4e-25	104
SRR492407.420059121	100.00	65	0	0	37	101	39795	39731	4e-30	121
SRR492407.421081182	96.55	29	1	0	1	29	7319	7291	2e-08	49.1
SRR492407.421081182	98.80	83	0	1	19	101	6896	6977	6e-38	147
SRR492407.421857251	100.00	62	0	0	1	62	95812	95873	2e-28	115
SRR492407.421857251	94.29	35	2	0	64	98	105465	105499	4e-10	54.7
SRR492407.423076072	100.00	24	0	0	1	24	100876	100899	2e-07	45.4
SRR492407.423076072	100.00	84	0	0	18	101	103307	103390	1e-40	156
SRR492407.423352991	100.00	47	0	0	1	47	29921	29875	4e-20	87.9
SRR492407.423352991	98.31	59	1	0	43	101	1756	1698	4e-25	104
SRR492407.423745082	96.74	92	2	1	1	91	9346	9437	1e-39	152
SRR492407.423745082	100.00	40	0	0	62	101	36536	36575	3e-16	75.0
SRR492407.423878481	100.00	46	0	0	1	46	39618	39663	1e-19	86.1
SRR492407.423878481	100.00	47	0	0	40	86	39926	39972	4e-20	87.9
SRR492407.423878482	100.00	47	0	0	1	47	39972	39926	4e-20	87.9
SRR492407.423878482	100.00	46	0	0	41	86	39663	39618	1e-19	86.1
SRR492407.423935512	100.00	70	0	0	1	70	91949	92018	6e-33	130
SRR492407.423935512	100.00	30	0	0	72	101	77376	77347	1e-10	56.5
SRR492407.423995881	91.36	81	7	0	1	81	40192	40112	2e-27	111
SRR492407.423995881	86.52	89	12	0	13	101	37944	37856	2e-23	99.0
SRR492407.42412742	100.00	66	0	0	1	66	76047	76112	1e-30	122
SRR492407.42412742	100.00	34	0	0	68	101	88121	88088	6e-13	63.9
SRR492407.424469361	100.00	66	0	0	1	66	34406	34341	1e-30	122
SRR492407.424469361	100.00	34	0	0	68	101	84919	84952	6e-13	63.9
SRR492407.425136021	98.81	84	0	1	1	84	103355	103437	2e-38	148
SRR492407.425136021	100.00	35	0	0	67	101	88269	88303	2e-13	65.8
SRR492407.425187982	100.00	63	0	0	1	63	73135	73073	5e-29	117
SRR492407.425187982	100.00	36	0	0	66	101	103163	103198	5e-14	67.6
SRR492407.425196652	100.00	81	0	0	1	81	62627	62547	5e-39	150
SRR492407.425196652	100.00	23	0	0	79	101	41389	41411	8e-07	43.6
SRR492407.426483051	94.44	54	1	2	1	52	98269	98216	2e-18	82.4
SRR492407.426483051	98.48	66	1	0	36	101	25047	24982	5e-29	117
SRR492407.42793602	100.00	84	0	0	1	84	103266	103183	1e-40	156
SRR492407.42793602	100.00	21	0	0	81	101	93701	93721	1e-05	39.9
SRR492407.428637701	97.22	36	1	0	1	36	23931	23896	2e-12	62.1
SRR492407.428637701	93.15	73	5	0	29	101	23882	23954	3e-26	108
SRR492407.429036722	100.00	68	0	0	1	68	87137	87204	8e-32	126
SRR492407.429036722	100.00	31	0	0	71	101	99880	99850	3e-11	58.4
SRR492407.430439151	97.53	81	1	1	1	81	97916	97995	4e-35	137
SRR492407.430439151	100.00	32	0	0	70	101	85358	85389	8e-12	60.2
SRR492407.430493192	100.00	83	0	0	1	83	45124	45206	4e-40	154
SRR492407.430493192	100.00	23	0	0	79	101	45196	45218	8e-07	43.6
SRR492407.430501141	100.00	53	0	0	1	53	90264	90212	2e-23	99.0
SRR492407.430501141	100.00	51	0	0	51	101	93633	93683	2e-22	95.3
SRR492407.430600802	100.00	67	0	0	1	67	86335	86269	3e-31	124
SRR492407.430600802	100.00	34	0	0	68	101	125012	124979	6e-13	63.9
SRR492407.430902171	100.00	81	0	0	1	81	43526	43446	5e-39	150
SRR492407.430902171	100.00	24	0	0	78	101	103628	103605	2e-07	45.4
SRR492407.431176562	100.00	91	0	0	1	91	9598	9688	1e-44	169
SRR492407.431176562	88.24	34	3	1	65	98	8088	8120	1e-05	39.9
SRR492407.431380222	100.00	66	0	0	1	66	96019	95954	1e-30	122
SRR492407.431380222	100.00	35	0	0	67	101	96853	96819	2e-13	65.8
SRR492407.431746111	100.00	23	0	0	1	23	127489	127467	8e-07	43.6
SRR492407.431746111	98.84	86	1	0	16	101	127443	127358	4e-40	154
SRR492407.43206142	100.00	57	0	0	1	57	59468	59412	1e-25	106
SRR492407.43206142	97.73	44	0	1	59	101	108143	108100	3e-16	75.0
SRR492407.432181271	94.12	34	2	0	1	34	90627	90660	1e-09	52.8
SRR492407.432181271	97.44	78	0	2	23	99	90660	90584	2e-33	132
SRR492407.43283842	100.00	80	0	0	1	80	57748	57827	2e-38	148
SRR492407.43283842	100.00	38	0	0	64	101	22828	22791	4e-15	71.3
SRR492407.43306312	100.00	73	0	0	1	73	103222	103294	1e-34	135
SRR492407.43306312	96.77	31	0	1	71	101	95985	95956	5e-09	51.0
SRR492407.43446231	100.00	75	0	0	1	75	104032	103958	1e-35	139
SRR492407.43446231	100.00	33	0	0	69	101	669	701	2e-12	62.1
SRR492407.434469311	96.15	26	1	0	1	26	60304	60329	8e-07	43.6
SRR492407.434469311	94.29	70	4	0	32	101	60351	60420	3e-26	108
SRR492407.435281971	97.06	68	1	1	1	68	72966	73032	6e-28	113
SRR492407.435281971	92.31	39	2	1	55	92	58152	58190	4e-10	54.7
SRR492407.435808831	98.88	89	1	0	1	89	66792	66704	8e-42	159
SRR492407.435808831	100.00	22	0	0	78	99	31028	31007	3e-06	41.7
SRR492407.436474071	97.83	92	1	1	1	91	78052	77961	3e-41	158
SRR492407.436474071	100.00	26	0	0	76	101	86800	86775	2e-08	49.1
SRR492407.436633661	100.00	37	0	0	1	37	86122	86158	1e-14	69.4
SRR492407.436633661	100.00	69	0	0	33	101	86258	86190	2e-32	128
SRR492407.436913431	98.48	66	0	1	1	65	95019	94954	2e-28	115
SRR492407.436913431	100.00	44	0	0	58	101	94689	94732	2e-18	82.4
SRR492407.43814321	100.00	49	0	0	1	49	96074	96026	3e-21	91.6
SRR492407.43814321	100.00	57	0	0	45	101	95881	95937	1e-25	106
SRR492407.438233622	96.36	55	1	1	1	55	98560	98507	1e-20	89.8
SRR492407.438233622	100.00	56	0	0	46	101	98618	98673	4e-25	104
SRR492407.438928301	96.30	27	1	0	1	27	39182	39208	2e-07	45.4
SRR492407.438928301	100.00	78	0	0	22	99	39208	39131	2e-37	145
SRR492407.439212761	100.00	95	0	0	1	95	9594	9688	8e-47	176
SRR492407.439212761	87.88	33	3	1	69	101	8088	8119	4e-05	38.1
SRR492407.439453091	100.00	77	0	0	1	77	5444	5520	8e-37	143
SRR492407.439453091	95.83	24	1	0	78	101	4613	4590	1e-05	39.9
SRR492407.440038051	100.00	67	0	0	1	67	104295	104229	3e-31	124
SRR492407.440038051	100.00	33	0	0	69	101	15357	15325	2e-12	62.1
SRR492407.440238491	100.00	46	0	0	1	46	72964	72919	1e-19	86.1
SRR492407.440238491	100.00	53	0	0	49	101	109452	109400	2e-23	99.0
SRR492407.440626161	100.00	68	0	0	1	68	76990	77057	8e-32	126
SRR492407.440626161	100.00	48	0	0	54	101	38700	38653	1e-20	89.8
SRR492407.440873372	95.24	42	1	1	1	42	121743	121703	2e-13	65.8
SRR492407.440873372	98.72	78	1	0	24	101	121543	121620	1e-35	139
SRR492407.44116241	90.41	73	7	0	1	73	109658	109730	6e-23	97.1
SRR492407.44116241	100.00	27	0	0	75	101	109761	109787	5e-09	51.0
SRR492407.44144731	100.00	32	0	0	1	32	84202	84171	8e-12	60.2
SRR492407.44144731	100.00	69	0	0	33	101	1	69	2e-32	128
SRR492407.441622761	100.00	79	0	0	1	79	57218	57296	6e-38	147
SRR492407.441622761	100.00	24	0	0	78	101	11159	11182	2e-07	45.4
SRR492407.443195621	98.59	71	1	0	1	71	106703	106633	8e-32	126
SRR492407.443195621	96.55	29	1	0	73	101	15693	15665	2e-08	49.1
SRR492407.444011012	100.00	33	0	0	1	33	59360	59328	2e-12	62.1
SRR492407.444011012	100.00	73	0	0	29	101	57851	57923	1e-34	135
SRR492407.444105332	91.36	81	6	1	1	80	35938	35858	8e-27	110
SRR492407.444105332	100.00	40	0	0	62	101	97190	97229	3e-16	75.0
SRR492407.444138192	100.00	54	0	0	1	54	16686	16633	5e-24	100
SRR492407.444138192	100.00	46	0	0	56	101	55978	56023	1e-19	86.1
SRR492407.444302691	100.00	47	0	0	1	47	110600	110554	4e-20	87.9
SRR492407.444302691	100.00	55	0	0	47	101	108463	108409	1e-24	102
SRR492407.444356461	100.00	50	0	0	1	50	35631	35680	8e-22	93.5
SRR492407.444356461	100.00	51	0	0	51	101	34830	34780	2e-22	95.3
SRR492407.444469361	100.00	21	0	0	1	21	3025	3045	1e-05	39.9
SRR492407.444469361	100.00	80	0	0	22	101	3469	3548	2e-38	148
SRR492407.444761381	100.00	35	0	0	1	35	43238	43204	2e-13	65.8
SRR492407.444761381	100.00	73	0	0	29	101	90530	90458	1e-34	135
SRR492407.444921411	100.00	37	0	0	1	37	90954	90918	1e-14	69.4
SRR492407.444921411	100.00	71	0	0	31	101	90978	91048	2e-33	132
SRR492407.445462641	93.75	32	2	0	1	32	109699	109730	2e-08	49.1
SRR492407.445462641	97.06	68	2	0	34	101	109761	109828	2e-28	115
SRR492407.445517661	100.00	68	0	0	1	68	68612	68679	8e-32	126
SRR492407.445517661	100.00	34	0	0	68	101	86188	86221	6e-13	63.9
SRR492407.445659721	100.00	51	0	0	1	51	38677	38627	2e-22	95.3
SRR492407.445659721	100.00	47	0	0	55	101	86116	86162	4e-20	87.9
SRR492407.445797102	96.00	25	1	0	1	25	688	664	3e-06	41.7
SRR492407.445797102	100.00	42	0	0	26	67	654	613	2e-17	78.7
SRR492407.445893902	100.00	24	0	0	1	24	84194	84171	2e-07	45.4
SRR492407.445893902	100.00	77	0	0	25	101	1	77	8e-37	143
SRR492407.446570811	96.49	57	1	1	1	56	109050	109106	8e-22	93.5
SRR492407.446570811	100.00	61	0	0	41	101	109017	108957	6e-28	113
SRR492407.447730011	98.78	82	1	0	1	82	28489	28570	6e-38	147
SRR492407.447730011	100.00	20	0	0	81	100	12862	12843	4e-05	38.1
SRR492407.447991441	100.00	64	0	0	1	64	760	823	1e-29	119
SRR492407.447991441	100.00	28	0	0	66	93	71818	71791	1e-09	52.8
SRR492407.448360111	100.00	62	0	0	1	62	25915	25854	2e-28	115
SRR492407.448360111	95.00	40	2	0	61	100	72957	72996	6e-13	63.9
SRR492407.449427452	100.00	64	0	0	1	64	81621	81684	1e-29	119
SRR492407.449427452	97.37	38	1	0	64	101	105397	105434	2e-13	65.8
SRR492407.451574691	98.82	85	1	0	1	85	9604	9688	1e-39	152
SRR492407.451574691	88.24	34	3	1	59	92	8088	8120	1e-05	39.9
SRR492407.451824362	100.00	91	0	0	1	91	9598	9688	1e-44	169
SRR492407.451824362	88.24	34	3	1	65	98	8088	8120	1e-05	39.9
SRR492407.451970401	100.00	76	0	0	1	76	85951	86026	3e-36	141
SRR492407.451970401	100.00	24	0	0	78	101	11684	11707	2e-07	45.4
SRR492407.452046801	100.00	37	0	0	1	37	126726	126762	1e-14	69.4
SRR492407.452046801	98.61	72	1	0	30	101	73358	73287	2e-32	128
SRR492407.452686831	100.00	69	0	0	1	69	98667	98735	2e-32	128
SRR492407.452686831	100.00	37	0	0	65	101	98908	98872	1e-14	69.4
SRR492407.452763752	100.00	51	0	0	1	51	65308	65258	2e-22	95.3
SRR492407.452763752	100.00	53	0	0	49	101	91757	91705	2e-23	99.0
SRR492407.453930971	90.48	42	3	1	1	42	87526	87486	4e-10	54.7
SRR492407.453930971	100.00	81	0	0	21	101	87283	87363	5e-39	150
SRR492407.454111271	98.39	62	0	1	1	61	97205	97144	3e-26	108
SRR492407.454111271	100.00	44	0	0	58	101	118934	118977	2e-18	82.4
SRR492407.45424761	100.00	69	0	0	1	69	96557	96489	2e-32	128
SRR492407.45424761	100.00	32	0	0	70	101	104328	104359	8e-12	60.2
SRR492407.45424762	100.00	64	0	0	1	64	104391	104328	1e-29	119
SRR492407.45424762	100.00	37	0	0	65	101	96489	96525	1e-14	69.4
SRR492407.45996671	97.06	34	1	0	1	34	46903	46870	3e-11	58.4
SRR492407.45996671	98.67	75	1	0	27	101	46822	46896	5e-34	134
SRR492407.47112401	100.00	26	0	0	1	26	93375	93350	2e-08	49.1
SRR492407.47112401	98.75	80	1	0	22	101	93338	93417	8e-37	143
SRR492407.47349431	96.77	31	1	0	1	31	118450	118480	1e-09	52.8
SRR492407.47349431	100.00	81	0	0	21	101	118748	118668	5e-39	150
SRR492407.47446272	100.00	74	0	0	1	74	93991	93918	4e-35	137
SRR492407.47446272	100.00	26	0	0	76	101	57349	57374	2e-08	49.1
SRR492407.47512351	100.00	30	0	0	1	30	202	173	1e-10	56.5
SRR492407.47512351	94.20	69	4	0	33	101	180	112	1e-25	106
SRR492407.48343592	100.00	62	0	0	1	62	99216	99277	2e-28	115
SRR492407.48343592	100.00	37	0	0	65	101	17710	17674	1e-14	69.4
SRR492407.49759562	100.00	74	0	0	1	74	57957	57884	4e-35	137
SRR492407.49759562	100.00	27	0	0	75	101	91689	91715	5e-09	51.0
SRR492407.50502512	96.00	25	1	0	1	25	688	664	3e-06	41.7
SRR492407.50502512	100.00	43	0	0	26	68	654	612	6e-18	80.5
SRR492407.50714451	100.00	73	0	0	1	73	76993	76921	1e-34	135
SRR492407.50714451	93.55	31	1	1	71	101	104586	104615	2e-07	45.4
SRR492407.50893781	100.00	57	0	0	1	57	98875	98931	1e-25	106
SRR492407.50893781	100.00	50	0	0	52	101	73914	73963	8e-22	93.5
SRR492407.51012202	100.00	81	0	0	1	81	80245	80325	5e-39	150
SRR492407.51012202	100.00	21	0	0	81	101	82450	82430	1e-05	39.9
SRR492407.52249421	100.00	69	0	0	4	72	73025	72957	2e-32	128
SRR492407.52249421	100.00	27	0	0	71	97	25854	25880	5e-09	51.0
SRR492407.52249422	100.00	69	0	0	1	69	17054	16986	2e-32	128
SRR492407.52249422	100.00	36	0	0	66	101	25936	25901	5e-14	67.6
SRR492407.52338812	100.00	27	0	0	1	27	42554	42528	5e-09	51.0
SRR492407.52338812	98.84	86	1	0	16	101	5377	5292	4e-40	154
SRR492407.52477961	96.10	77	0	1	1	77	116453	116380	1e-30	122
SRR492407.52477961	100.00	36	0	0	66	101	116584	116619	5e-14	67.6
SRR492407.52716322	100.00	66	0	0	1	66	93637	93702	1e-30	122
SRR492407.52716322	100.00	34	0	0	68	101	90110	90143	6e-13	63.9
SRR492407.52853302	98.21	56	1	0	1	56	127499	127444	2e-23	99.0
SRR492407.52853302	100.00	45	0	0	57	101	89160	89204	5e-19	84.2
SRR492407.5393271	97.56	41	0	1	1	41	105633	105672	1e-14	69.4
SRR492407.5393271	100.00	70	0	0	32	101	107072	107003	6e-33	130
SRR492407.5422502	97.22	72	2	0	1	72	91891	91820	1e-30	122
SRR492407.5422502	100.00	40	0	0	62	101	57247	57286	3e-16	75.0
SRR492407.54329892	100.00	71	0	0	1	71	73037	73107	2e-33	132
SRR492407.54329892	96.97	33	0	1	69	101	93182	93213	4e-10	54.7
SRR492407.54335332	100.00	58	0	0	1	58	87585	87528	3e-26	108
SRR492407.54335332	100.00	43	0	0	59	101	100067	100025	6e-18	80.5
SRR492407.54641422	100.00	55	0	0	1	55	3341	3287	1e-24	102
SRR492407.54641422	100.00	46	0	0	56	101	14462	14417	1e-19	86.1
SRR492407.55055172	97.14	35	0	1	1	34	58186	58152	3e-11	58.4
SRR492407.55055172	97.44	78	1	1	20	97	73033	72957	2e-33	132
SRR492407.55088032	100.00	70	0	0	1	70	41048	41117	6e-33	130
SRR492407.55088032	100.00	29	0	0	73	101	91802	91830	4e-10	54.7
SRR492407.55553551	100.00	25	0	0	1	25	20328	20304	6e-08	47.3
SRR492407.55553551	100.00	81	0	0	20	100	20301	20221	5e-39	150
SRR492407.5681241	100.00	75	0	0	1	75	6087	6161	1e-35	139
SRR492407.5681241	100.00	24	0	0	78	101	104161	104138	2e-07	45.4
SRR492407.57805732	94.94	79	4	0	1	79	110016	110094	3e-31	124
SRR492407.57805732	86.11	36	3	2	65	99	111164	111198	4e-05	38.1
SRR492407.57988011	100.00	31	0	0	1	31	1453	1483	3e-11	58.4
SRR492407.57988011	100.00	73	0	0	29	101	1446	1374	1e-34	135
SRR492407.58505641	100.00	72	0	0	1	72	110223	110294	5e-34	134
SRR492407.58505641	100.00	32	0	0	70	101	110281	110312	8e-12	60.2
SRR492407.58579621	100.00	63	0	0	1	63	126399	126337	5e-29	117
SRR492407.58579621	90.57	53	4	1	50	101	86568	86620	1e-14	69.4
SRR492407.59327011	100.00	37	0	0	1	37	87319	87283	1e-14	69.4
SRR492407.59327011	100.00	64	0	0	38	101	92265	92202	1e-29	119
SRR492407.59945611	100.00	46	0	0	1	46	19733	19688	1e-19	86.1
SRR492407.59945611	100.00	53	0	0	49	101	105652	105704	2e-23	99.0
SRR492407.61438861	96.36	55	1	1	1	54	27443	27497	1e-20	89.8
SRR492407.61438861	94.81	77	2	2	27	101	27837	27761	1e-29	119
SRR492407.62268462	100.00	25	0	0	1	25	72981	72957	6e-08	47.3
SRR492407.62268462	100.00	78	0	0	24	101	25854	25931	2e-37	145
SRR492407.62413212	100.00	68	0	0	1	68	94266	94333	8e-32	126
SRR492407.62413212	100.00	32	0	0	70	101	109215	109246	8e-12	60.2
SRR492407.62603451	96.72	61	0	1	1	61	48585	48527	5e-24	100
SRR492407.62603451	97.87	47	1	0	55	101	48612	48658	2e-18	82.4
SRR492407.62711671	100.00	70	0	0	1	70	32463	32532	6e-33	130
SRR492407.62711671	90.00	30	1	2	52	80	126211	126183	4e-05	38.1
SRR492407.62937741	97.33	75	2	0	1	75	122942	123016	2e-32	128
SRR492407.62937741	94.44	36	1	1	66	101	50198	50164	4e-10	54.7
SRR492407.63162201	100.00	31	0	0	1	31	62414	62444	3e-11	58.4
SRR492407.63162201	100.00	73	0	0	29	101	62547	62475	1e-34	135
SRR492407.63272891	100.00	32	0	0	1	32	108276	108307	8e-12	60.2
SRR492407.63272891	92.59	81	5	1	21	101	107483	107404	2e-28	115
SRR492407.64340702	94.51	91	4	1	1	91	44478	44389	1e-35	139
SRR492407.64340702	100.00	23	0	0	79	101	44359	44337	8e-07	43.6
SRR492407.64768672	100.00	41	0	0	1	41	96412	96452	8e-17	76.8
SRR492407.64768672	100.00	60	0	0	42	101	107022	107081	2e-27	111
SRR492407.65273462	100.00	80	0	0	1	80	92584	92663	2e-38	148
SRR492407.65273462	100.00	20	0	0	82	101	106132	106113	4e-05	38.1
SRR492407.65658781	98.21	56	1	0	1	56	127392	127337	2e-23	99.0
SRR492407.65658781	100.00	54	0	0	48	101	127110	127163	5e-24	100
SRR492407.65904062	100.00	73	0	0	1	73	75345	75417	1e-34	135
SRR492407.65904062	96.67	30	0	1	73	101	95264	95293	2e-08	49.1
SRR492407.65911262	100.00	69	0	0	1	69	99840	99908	2e-32	128
SRR492407.65911262	100.00	30	0	0	72	101	40097	40068	1e-10	56.5
SRR492407.66089232	98.57	70	1	0	1	70	111367	111436	3e-31	124
SRR492407.66089232	100.00	30	0	0	72	101	37056	37027	1e-10	56.5
SRR492407.66599731	100.00	29	0	0	1	29	95459	95487	4e-10	54.7
SRR492407.66599731	100.00	74	0	0	27	100	95503	95430	4e-35	137
SRR492407.66741041	100.00	33	0	0	1	33	69058	69090	2e-12	62.1
SRR492407.66741041	100.00	73	0	0	29	101	69132	69060	1e-34	135
SRR492407.67936131	98.28	58	1	0	1	58	28187	28244	1e-24	102
SRR492407.67936131	96.08	51	2	0	51	101	28181	28131	5e-19	84.2
SRR492407.68259901	100.00	75	0	0	1	75	128182	128108	1e-35	139
SRR492407.68259901	100.00	29	0	0	73	101	302	330	4e-10	54.7
SRR492407.68409551	100.00	77	0	0	1	77	108727	108651	8e-37	143
SRR492407.68409551	100.00	25	0	0	77	101	83674	83698	6e-08	47.3
SRR492407.69238951	100.00	77	0	0	1	77	99260	99336	8e-37	143
SRR492407.69238951	100.00	24	0	0	78	101	17644	17621	2e-07	45.4
SRR492407.69852101	100.00	38	0	0	1	38	52576	52539	4e-15	71.3
SRR492407.69852101	98.59	71	0	1	32	101	52574	52644	3e-31	124
SRR492407.70124641	100.00	63	0	0	1	63	106937	106999	5e-29	117
SRR492407.70124641	100.00	36	0	0	65	100	53113	53078	5e-14	67.6
SRR492407.70348671	92.59	27	2	0	1	27	85507	85533	1e-05	39.9
SRR492407.70348671	100.00	79	0	0	23	101	85547	85469	6e-38	147
SRR492407.70370641	98.57	70	1	0	1	70	51834	51765	3e-31	124
SRR492407.70370641	100.00	42	0	0	60	101	51525	51566	2e-17	78.7
SRR492407.70550751	100.00	78	0	0	1	78	45273	45196	2e-37	145
SRR492407.70550751	96.43	28	1	0	74	101	45206	45179	6e-08	47.3
SRR492407.70819021	100.00	28	0	0	1	28	37254	37227	1e-09	52.8
SRR492407.70819021	100.00	82	0	0	20	101	97354	97273	1e-39	152
SRR492407.70879391	100.00	37	0	0	1	37	86243	86279	1e-14	69.4
SRR492407.70879391	100.00	70	0	0	32	101	86310	86241	6e-33	130
SRR492407.71819911	95.56	45	0	2	1	45	9510	9468	4e-15	71.3
SRR492407.71819911	98.48	66	1	0	36	101	9520	9585	5e-29	117
SRR492407.71819912	98.80	83	1	0	1	83	9602	9520	2e-38	148
SRR492407.71819912	92.86	28	0	2	74	101	9468	9493	1e-05	39.9
SRR492407.72027531	100.00	54	0	0	1	54	45895	45842	5e-24	100
SRR492407.72027531	100.00	47	0	0	55	101	45386	45340	4e-20	87.9
SRR492407.72101182	100.00	67	0	0	1	67	15909	15843	3e-31	124
SRR492407.72101182	97.30	37	1	0	65	101	86870	86906	6e-13	63.9
SRR492407.73684681	100.00	62	0	0	1	62	112394	112455	2e-28	115
SRR492407.73684681	100.00	40	0	0	62	101	105189	105150	3e-16	75.0
SRR492407.74970771	100.00	60	0	0	1	60	5144	5203	2e-27	111
SRR492407.74970771	100.00	40	0	0	62	101	22247	22208	3e-16	75.0
SRR492407.76303581	96.97	33	1	0	1	33	56705	56737	1e-10	56.5
SRR492407.76303581	94.74	76	4	0	26	101	124681	124756	1e-29	119
SRR492407.76439111	96.00	25	1	0	3	27	688	664	3e-06	41.7
SRR492407.76439111	86.49	74	8	2	28	100	654	582	6e-18	80.5
SRR492407.78899271	100.00	52	0	0	1	52	69678	69627	6e-23	97.1
SRR492407.78899271	100.00	49	0	0	53	101	109671	109719	3e-21	91.6
SRR492407.79571641	97.14	35	1	0	1	35	104034	104000	8e-12	60.2
SRR492407.79571641	100.00	74	0	0	28	101	104310	104237	4e-35	137
SRR492407.80876691	100.00	73	0	0	1	73	83098	83026	1e-34	135
SRR492407.80876691	100.00	28	0	0	74	101	111616	111589	1e-09	52.8
SRR492407.81089791	100.00	22	0	0	1	22	110045	110024	3e-06	41.7
SRR492407.81089791	95.00	80	4	0	7	86	110024	110103	8e-32	126
SRR492407.81089792	100.00	76	0	0	1	76	110099	110024	3e-36	141
SRR492407.81089792	100.00	22	0	0	61	82	110024	110045	3e-06	41.7
SRR492407.8168461	97.37	76	2	0	1	76	96853	96928	6e-33	130
SRR492407.8168461	100.00	36	0	0	66	101	96845	96810	5e-14	67.6
SRR492407.81969492	100.00	58	0	0	1	58	88588	88645	3e-26	108
SRR492407.81969492	100.00	42	0	0	60	101	107364	107405	2e-17	78.7
SRR492407.82117351	93.55	62	2	2	1	62	76515	76456	3e-21	91.6
SRR492407.82117351	100.00	60	0	0	42	101	76531	76590	2e-27	111
SRR492407.82588712	100.00	28	0	0	1	28	102828	102855	1e-09	52.8
SRR492407.82588712	100.00	75	0	0	27	101	106966	107040	1e-35	139
SRR492407.8318061	100.00	39	0	0	1	39	10188	10226	1e-15	73.1
SRR492407.8318061	100.00	62	0	0	40	101	10204	10265	2e-28	115
SRR492407.85367572	100.00	59	0	0	1	59	109786	109844	8e-27	110
SRR492407.85367572	98.18	55	0	1	48	101	109972	109918	2e-22	95.3
SRR492407.85608432	100.00	61	0	0	1	61	102940	102880	6e-28	113
SRR492407.85608432	96.67	30	1	0	64	93	23184	23213	5e-09	51.0
SRR492407.86011811	100.00	57	0	0	1	57	103810	103866	1e-25	106
SRR492407.86011811	100.00	47	0	0	55	101	103844	103890	4e-20	87.9
SRR492407.86258612	96.00	50	2	0	1	50	109810	109761	2e-18	82.4
SRR492407.86258612	89.58	48	5	0	52	99	109730	109683	2e-12	62.1
SRR492407.86530491	100.00	37	0	0	1	37	4240	4204	1e-14	69.4
SRR492407.86530491	94.29	70	4	0	32	101	4162	4231	3e-26	108
SRR492407.8653752	100.00	84	0	0	1	84	79023	79106	1e-40	156
SRR492407.8653752	95.83	24	0	1	79	101	79282	79259	4e-05	38.1
SRR492407.87084871	100.00	59	0	0	1	59	117617	117559	8e-27	110
SRR492407.87084871	97.14	35	1	0	62	96	107154	107120	8e-12	60.2
SRR492407.87295911	100.00	64	0	0	1	64	123057	123120	1e-29	119
SRR492407.87295911	100.00	35	0	0	67	101	102365	102399	2e-13	65.8
SRR492407.87591852	100.00	67	0	0	1	67	39757	39691	3e-31	124
SRR492407.87591852	100.00	32	0	0	70	101	89423	89392	8e-12	60.2
SRR492407.88488951	100.00	73	0	0	1	73	88790	88718	1e-34	135
SRR492407.88488951	100.00	33	0	0	69	101	88443	88475	2e-12	62.1
SRR492407.88488952	100.00	83	0	0	1	83	88525	88443	4e-40	154
SRR492407.88488952	100.00	23	0	0	79	101	88718	88740	8e-07	43.6
SRR492407.8877952	100.00	69	0	0	1	69	103290	103222	2e-32	128
SRR492407.8877952	100.00	32	0	0	70	101	119790	119759	8e-12	60.2
SRR492407.89026552	100.00	25	0	0	1	25	197	173	6e-08	47.3
SRR492407.89026552	100.00	69	0	0	28	96	180	112	2e-32	128
SRR492407.89099331	100.00	25	0	0	1	25	117755	117779	6e-08	47.3
SRR492407.89099331	100.00	81	0	0	21	101	117788	117868	5e-39	150
SRR492407.89442861	100.00	67	0	0	1	67	103661	103595	3e-31	124
SRR492407.89442861	92.31	39	3	0	63	101	103349	103387	1e-10	56.5
SRR492407.89452511	100.00	43	0	0	1	43	21781	21823	6e-18	80.5
SRR492407.89452511	100.00	63	0	0	39	101	22022	21960	5e-29	117
SRR492407.89588481	100.00	67	0	0	1	67	103661	103595	3e-31	124
SRR492407.89588481	94.87	39	2	0	63	101	103349	103387	2e-12	62.1
SRR492407.89876032	100.00	30	0	0	1	30	115759	115788	1e-10	56.5
SRR492407.89876032	100.00	75	0	0	27	101	115770	115696	1e-35	139
SRR492407.89919991	100.00	61	0	0	1	61	108233	108173	6e-28	113
SRR492407.89919991	100.00	39	0	0	63	101	46374	46412	1e-15	73.1
SRR492407.91965722	98.57	70	1	0	1	70	78526	78457	3e-31	124
SRR492407.91965722	100.00	30	0	0	72	101	94132	94161	1e-10	56.5
SRR492407.92074081	100.00	36	0	0	1	36	37120	37155	5e-14	67.6
SRR492407.92074081	100.00	69	0	0	33	101	37165	37097	2e-32	128
SRR492407.92125971	100.00	40	0	0	1	40	100987	101026	3e-16	75.0
SRR492407.92125971	100.00	60	0	0	42	101	117651	117710	2e-27	111
SRR492407.93085511	100.00	39	0	0	1	39	89686	89724	1e-15	73.1
SRR492407.93085511	100.00	68	0	0	34	101	90543	90610	8e-32	126
SRR492407.93143371	98.65	74	0	1	1	74	34304	34232	6e-33	130
SRR492407.93143371	100.00	40	0	0	62	101	37212	37173	3e-16	75.0
SRR492407.93357242	96.30	27	1	0	1	27	65300	65326	2e-07	45.4
SRR492407.93357242	98.88	89	1	0	13	101	65432	65344	8e-42	159
SRR492407.94909161	98.67	75	0	1	1	74	4177	4103	2e-33	132
SRR492407.94909161	100.00	31	0	0	71	101	3900	3930	3e-11	58.4
SRR492407.95027362	92.00	50	4	0	1	50	87035	87084	4e-15	71.3
SRR492407.95027362	90.00	30	3	0	68	97	87897	87926	1e-05	39.9
SRR492407.95031891	100.00	62	0	0	1	62	108928	108989	2e-28	115
SRR492407.95031891	100.00	39	0	0	63	101	49492	49454	1e-15	73.1
SRR492407.95046262	100.00	40	0	0	1	40	25893	25854	3e-16	75.0
SRR492407.95046262	100.00	60	0	0	39	98	72957	73016	2e-27	111
SRR492407.95193471	100.00	60	0	0	1	60	13203	13262	2e-27	111
SRR492407.95193471	100.00	42	0	0	60	101	76937	76978	2e-17	78.7
SRR492407.95480502	100.00	83	0	0	1	83	45124	45206	4e-40	154
SRR492407.95480502	92.86	28	1	1	73	100	30850	30824	1e-05	39.9
SRR492407.96360811	100.00	55	0	0	1	55	58479	58425	1e-24	102
SRR492407.96360811	100.00	52	0	0	50	101	58504	58555	6e-23	97.1
SRR492407.96834862	100.00	69	0	0	1	69	18682	18614	2e-32	128
SRR492407.96834862	95.45	44	1	1	58	101	18690	18732	1e-14	69.4
SRR492407.97383662	100.00	40	0	0	1	40	98339	98300	3e-16	75.0
SRR492407.97383662	100.00	66	0	0	36	101	52197	52262	1e-30	122
SRR492407.98587651	100.00	36	0	0	1	36	127868	127903	5e-14	67.6
SRR492407.98587651	100.00	72	0	0	30	101	127915	127844	5e-34	134
SRR492407.99500961	97.56	41	0	1	1	41	88861	88900	1e-14	69.4
SRR492407.99500961	100.00	69	0	0	33	101	17278	17346	2e-32	128
SRR492407.99832171	100.00	25	0	0	1	25	23471	23447	6e-08	47.3
SRR492407.99832171	100.00	76	0	0	26	101	23448	23523	3e-36	141

## Sheet: polIb
Read Identifiant	Match %	Aligned bases	Mismatches	Gap Openings	Start Pos. Read	Stop Pos. Read	Start Pos. Genome	Stop Pos. Genome	Expect Value	Bit Score
HWI-ST942:56:C4CFMACXX:7:1101:10899:928092	100.00	66	0	0	1	66	124192	124127	1e-30	122
HWI-ST942:56:C4CFMACXX:7:1101:10899:928092	100.00	34	0	0	67	100	81448	81481	6e-13	63.9
HWI-ST942:56:C4CFMACXX:7:1101:14555:635712	100.00	77	0	0	1	77	8410	8486	8e-37	143
HWI-ST942:56:C4CFMACXX:7:1101:14555:635712	100.00	25	0	0	76	100	1789	1813	6e-08	47.3
HWI-ST942:56:C4CFMACXX:7:1101:17956:549232	100.00	54	0	0	1	54	76770	76823	5e-24	100
HWI-ST942:56:C4CFMACXX:7:1101:17956:549232	100.00	46	0	0	53	98	11082	11127	1e-19	86.1
HWI-ST942:56:C4CFMACXX:7:1101:18117:987001	100.00	71	0	0	1	71	81413	81483	2e-33	132
HWI-ST942:56:C4CFMACXX:7:1101:18117:987001	100.00	31	0	0	70	100	121111	121081	3e-11	58.4
HWI-ST942:56:C4CFMACXX:7:1101:19075:483772	94.92	59	3	0	1	59	118959	118901	8e-22	93.5
HWI-ST942:56:C4CFMACXX:7:1101:19075:483772	100.00	50	0	0	47	96	118878	118927	8e-22	93.5
HWI-ST942:56:C4CFMACXX:7:1101:4974:705021	100.00	61	0	0	1	61	42509	42569	6e-28	113
HWI-ST942:56:C4CFMACXX:7:1101:4974:705021	88.89	54	6	0	47	100	118866	118919	5e-14	67.6
HWI-ST942:56:C4CFMACXX:7:1101:5840:789681	100.00	84	0	0	1	84	91487	91570	1e-40	156
HWI-ST942:56:C4CFMACXX:7:1101:5840:789681	100.00	26	0	0	74	99	91578	91603	2e-08	49.1
HWI-ST942:56:C4CFMACXX:7:1101:6050:563172	100.00	29	0	0	1	29	112129	112101	4e-10	54.7
HWI-ST942:56:C4CFMACXX:7:1101:6050:563172	100.00	75	0	0	26	100	112210	112136	1e-35	139
HWI-ST942:56:C4CFMACXX:7:1101:7407:623042	98.04	51	0	1	1	50	75266	75316	3e-20	87.9
HWI-ST942:56:C4CFMACXX:7:1101:7407:623042	100.00	41	0	0	43	83	88526	88566	6e-17	76.8
HWI-ST942:56:C4CFMACXX:7:1101:7878:646562	100.00	39	0	0	1	39	85693	85655	1e-15	73.1
HWI-ST942:56:C4CFMACXX:7:1101:7878:646562	100.00	69	0	0	32	100	85534	85602	2e-32	128
HWI-ST942:56:C4CFMACXX:7:1101:9097:266962	100.00	74	0	0	1	74	61323	61250	4e-35	137
HWI-ST942:56:C4CFMACXX:7:1101:9097:266962	100.00	34	0	0	67	100	113744	113777	6e-13	63.9
HWI-ST942:56:C4CFMACXX:7:1101:9694:81262	100.00	37	0	0	1	37	47583	47619	1e-14	69.4
HWI-ST942:56:C4CFMACXX:7:1101:9694:81262	100.00	63	0	0	37	99	115881	115819	5e-29	117
HWI-ST942:56:C4CFMACXX:7:1102:12216:216912	100.00	28	0	0	1	28	35288	35261	1e-09	52.8
HWI-ST942:56:C4CFMACXX:7:1102:12216:216912	100.00	74	0	0	26	99	35218	35145	4e-35	137
HWI-ST942:56:C4CFMACXX:7:1102:13691:113931	97.65	85	1	1	1	85	45114	45197	2e-37	145
HWI-ST942:56:C4CFMACXX:7:1102:13691:113931	100.00	24	0	0	77	100	389	366	2e-07	45.4
HWI-ST942:56:C4CFMACXX:7:1102:16695:897872	100.00	58	0	0	1	58	91705	91648	3e-26	108
HWI-ST942:56:C4CFMACXX:7:1102:16695:897872	100.00	48	0	0	53	100	91817	91770	1e-20	89.8
HWI-ST942:56:C4CFMACXX:7:1102:1749:145661	100.00	60	0	0	1	60	43420	43361	2e-27	111
HWI-ST942:56:C4CFMACXX:7:1102:1749:145661	100.00	40	0	0	60	99	10955	10994	3e-16	75.0
HWI-ST942:56:C4CFMACXX:7:1102:1779:691462	100.00	25	0	0	1	25	121086	121110	6e-08	47.3
HWI-ST942:56:C4CFMACXX:7:1102:1779:691462	100.00	77	0	0	23	99	121127	121051	8e-37	143
HWI-ST942:56:C4CFMACXX:7:1102:2224:413382	100.00	56	0	0	1	56	40759	40704	4e-25	104
HWI-ST942:56:C4CFMACXX:7:1102:2224:413382	100.00	47	0	0	52	98	40657	40703	4e-20	87.9
HWI-ST942:56:C4CFMACXX:7:1102:4273:768531	100.00	72	0	0	1	72	122612	122683	4e-34	134
HWI-ST942:56:C4CFMACXX:7:1102:4273:768531	100.00	26	0	0	71	96	122599	122624	2e-08	49.1
HWI-ST942:56:C4CFMACXX:7:1102:4273:768532	100.00	47	0	0	1	47	122645	122599	4e-20	87.9
HWI-ST942:56:C4CFMACXX:7:1102:4273:768532	100.00	54	0	0	46	99	122683	122630	5e-24	100
HWI-ST942:56:C4CFMACXX:7:1102:5771:684552	100.00	38	0	0	1	38	118720	118757	4e-15	71.3
HWI-ST942:56:C4CFMACXX:7:1102:5771:684552	100.00	60	0	0	40	99	118282	118341	2e-27	111
HWI-ST942:56:C4CFMACXX:7:1102:5889:966912	100.00	75	0	0	1	75	85159	85233	1e-35	139
HWI-ST942:56:C4CFMACXX:7:1102:5889:966912	95.65	23	1	0	76	98	85109	85087	4e-05	38.1
HWI-ST942:56:C4CFMACXX:7:1102:6820:875212	100.00	46	0	0	1	46	17348	17303	1e-19	86.1
HWI-ST942:56:C4CFMACXX:7:1102:6820:875212	100.00	62	0	0	37	98	100915	100854	2e-28	115
HWI-ST942:56:C4CFMACXX:7:1102:8180:195092	100.00	70	0	0	1	70	41566	41635	6e-33	130
HWI-ST942:56:C4CFMACXX:7:1102:8180:195092	97.62	42	1	0	59	100	45168	45209	1e-15	73.1
HWI-ST942:56:C4CFMACXX:7:1102:8822:108222	96.30	27	0	1	1	26	121106	121132	8e-07	43.6
HWI-ST942:56:C4CFMACXX:7:1102:8822:108222	100.00	79	0	0	21	99	121241	121163	6e-38	147
HWI-ST942:56:C4CFMACXX:7:1103:11103:177292	97.37	38	1	0	1	38	50330	50293	2e-13	65.8
HWI-ST942:56:C4CFMACXX:7:1103:11103:177292	100.00	66	0	0	32	97	94864	94929	1e-30	122
HWI-ST942:56:C4CFMACXX:7:1103:11947:997882	94.23	52	3	0	1	52	85912	85963	6e-18	80.5
HWI-ST942:56:C4CFMACXX:7:1103:11947:997882	100.00	65	0	0	36	100	85963	85899	4e-30	121
HWI-ST942:56:C4CFMACXX:7:1103:1208:644592	97.14	35	1	0	1	35	4855	4821	8e-12	60.2
HWI-ST942:56:C4CFMACXX:7:1103:1208:644592	100.00	76	0	0	24	99	4821	4896	3e-36	141
HWI-ST942:56:C4CFMACXX:7:1103:13400:212951	100.00	69	0	0	1	69	16085	16017	2e-32	128
HWI-ST942:56:C4CFMACXX:7:1103:13400:212951	100.00	32	0	0	69	100	111737	111768	8e-12	60.2
HWI-ST942:56:C4CFMACXX:7:1103:13400:212952	100.00	77	0	0	1	77	111813	111737	8e-37	143
HWI-ST942:56:C4CFMACXX:7:1103:13400:212952	100.00	24	0	0	77	100	16017	16040	2e-07	45.4
HWI-ST942:56:C4CFMACXX:7:1103:15601:215392	100.00	60	0	0	1	60	45025	44966	2e-27	111
HWI-ST942:56:C4CFMACXX:7:1103:15601:215392	100.00	46	0	0	51	96	7704	7749	1e-19	86.1
HWI-ST942:56:C4CFMACXX:7:1103:1767:730492	96.97	33	1	0	1	33	96024	96056	1e-10	56.5
HWI-ST942:56:C4CFMACXX:7:1103:1767:730492	98.63	73	1	0	27	99	96124	96052	6e-33	130
HWI-ST942:56:C4CFMACXX:7:1103:18675:477481	100.00	25	0	0	1	25	15897	15921	6e-08	47.3
HWI-ST942:56:C4CFMACXX:7:1103:18675:477481	95.65	92	4	0	9	100	112056	112147	2e-38	148
HWI-ST942:56:C4CFMACXX:7:1103:18705:592902	100.00	77	0	0	1	77	20558	20634	8e-37	143
HWI-ST942:56:C4CFMACXX:7:1103:18705:592902	100.00	24	0	0	77	100	24276	24299	2e-07	45.4
HWI-ST942:56:C4CFMACXX:7:1103:2628:950822	96.43	28	1	0	1	28	13371	13344	6e-08	47.3
HWI-ST942:56:C4CFMACXX:7:1103:2628:950822	100.00	79	0	0	22	100	13292	13370	6e-38	147
HWI-ST942:56:C4CFMACXX:7:1103:8426:624662	93.33	60	4	0	1	60	79880	79821	1e-20	89.8
HWI-ST942:56:C4CFMACXX:7:1103:8426:624662	100.00	54	0	0	46	99	79818	79871	5e-24	100
HWI-ST942:56:C4CFMACXX:7:1103:9834:123441	100.00	33	0	0	1	33	86742	86710	2e-12	62.1
HWI-ST942:56:C4CFMACXX:7:1103:9834:123441	100.00	66	0	0	32	97	86822	86757	1e-30	122
HWI-ST942:56:C4CFMACXX:7:1104:10074:827552	100.00	26	0	0	1	26	86454	86479	2e-08	49.1
HWI-ST942:56:C4CFMACXX:7:1104:10074:827552	100.00	78	0	0	23	100	86506	86429	2e-37	145
HWI-ST942:56:C4CFMACXX:7:1104:11396:1005892	100.00	41	0	0	1	41	63940	63980	8e-17	76.8
HWI-ST942:56:C4CFMACXX:7:1104:11396:1005892	100.00	63	0	0	37	99	64065	64003	5e-29	117
HWI-ST942:56:C4CFMACXX:7:1104:12282:785801	98.77	81	1	0	1	81	116351	116271	2e-37	145
HWI-ST942:56:C4CFMACXX:7:1104:12282:785801	100.00	20	0	0	81	100	80945	80926	4e-05	38.1
HWI-ST942:56:C4CFMACXX:7:1104:12282:785802	100.00	79	0	0	1	79	80867	80945	6e-38	147
HWI-ST942:56:C4CFMACXX:7:1104:12282:785802	100.00	21	0	0	79	99	116271	116291	1e-05	39.9
HWI-ST942:56:C4CFMACXX:7:1104:13064:444461	100.00	74	0	0	1	74	84375	84448	4e-35	137
HWI-ST942:56:C4CFMACXX:7:1104:13064:444461	100.00	24	0	0	75	98	116404	116381	2e-07	45.4
HWI-ST942:56:C4CFMACXX:7:1104:14273:914092	100.00	68	0	0	1	68	37978	38045	8e-32	126
HWI-ST942:56:C4CFMACXX:7:1104:14273:914092	100.00	40	0	0	60	99	22257	22218	3e-16	75.0
HWI-ST942:56:C4CFMACXX:7:1104:15376:550952	100.00	26	0	0	1	26	91420	91395	2e-08	49.1
HWI-ST942:56:C4CFMACXX:7:1104:15376:550952	100.00	67	0	0	34	100	106105	106171	3e-31	124
HWI-ST942:56:C4CFMACXX:7:1104:3206:153972	100.00	65	0	0	1	65	14157	14221	4e-30	121
HWI-ST942:56:C4CFMACXX:7:1104:3206:153972	100.00	36	0	0	64	99	24791	24826	5e-14	67.6
HWI-ST942:56:C4CFMACXX:7:1104:4068:916491	100.00	63	0	0	1	63	14250	14312	5e-29	117
HWI-ST942:56:C4CFMACXX:7:1104:4068:916491	100.00	36	0	0	64	99	103499	103464	5e-14	67.6
HWI-ST942:56:C4CFMACXX:7:1104:8945:287552	100.00	83	0	0	1	83	88204	88122	4e-40	154
HWI-ST942:56:C4CFMACXX:7:1104:8945:287552	100.00	28	0	0	73	100	40397	40424	1e-09	52.8
HWI-ST942:56:C4CFMACXX:7:1105:11279:86562	100.00	80	0	0	1	80	90931	90852	2e-38	148
HWI-ST942:56:C4CFMACXX:7:1105:11279:86562	100.00	21	0	0	79	99	17215	17195	1e-05	39.9
HWI-ST942:56:C4CFMACXX:7:1105:1311:147122	100.00	56	0	0	1	56	126087	126032	4e-25	104
HWI-ST942:56:C4CFMACXX:7:1105:1311:147122	96.30	54	2	0	47	100	107593	107540	1e-20	89.8
HWI-ST942:56:C4CFMACXX:7:1105:15954:473801	100.00	66	0	0	1	66	100707	100772	1e-30	122
HWI-ST942:56:C4CFMACXX:7:1105:15954:473801	100.00	34	0	0	67	100	82403	82370	6e-13	63.9
HWI-ST942:56:C4CFMACXX:7:1105:18425:926101	100.00	83	0	0	1	83	50816	50734	4e-40	154
HWI-ST942:56:C4CFMACXX:7:1105:18425:926101	100.00	21	0	0	80	100	124710	124690	1e-05	39.9
HWI-ST942:56:C4CFMACXX:7:1105:20253:483292	95.45	66	3	0	1	66	54892	54957	1e-25	106
HWI-ST942:56:C4CFMACXX:7:1105:20253:483292	100.00	45	0	0	52	96	35486	35530	5e-19	84.2
HWI-ST942:56:C4CFMACXX:7:1105:2146:895461	100.00	83	0	0	1	83	92498	92416	4e-40	154
HWI-ST942:56:C4CFMACXX:7:1105:2146:895461	100.00	21	0	0	80	100	52274	52254	1e-05	39.9
HWI-ST942:56:C4CFMACXX:7:1105:5026:534242	98.51	67	1	0	1	67	105542	105476	1e-29	119
HWI-ST942:56:C4CFMACXX:7:1105:5026:534242	97.62	42	1	0	59	100	98791	98750	1e-15	73.1
HWI-ST942:56:C4CFMACXX:7:1105:5367:372982	100.00	24	0	0	1	24	103302	103325	2e-07	45.4
HWI-ST942:56:C4CFMACXX:7:1105:5367:372982	100.00	80	0	0	19	98	103381	103302	2e-38	148
HWI-ST942:56:C4CFMACXX:7:1105:6841:129022	100.00	76	0	0	1	76	104147	104072	3e-36	141
HWI-ST942:56:C4CFMACXX:7:1105:6841:129022	100.00	26	0	0	75	100	664	689	2e-08	49.1
HWI-ST942:56:C4CFMACXX:7:1105:6874:865861	98.55	69	1	0	1	69	23010	23078	1e-30	122
HWI-ST942:56:C4CFMACXX:7:1105:6874:865861	100.00	33	0	0	68	100	70855	70823	2e-12	62.1
HWI-ST942:56:C4CFMACXX:7:1105:9671:563752	100.00	75	0	0	1	75	86419	86345	1e-35	139
HWI-ST942:56:C4CFMACXX:7:1105:9671:563752	100.00	27	0	0	74	100	29919	29893	5e-09	51.0
HWI-ST942:56:C4CFMACXX:7:1106:12134:778431	100.00	74	0	0	1	74	97173	97100	4e-35	137
HWI-ST942:56:C4CFMACXX:7:1106:12134:778431	100.00	28	0	0	73	100	95219	95192	1e-09	52.8
HWI-ST942:56:C4CFMACXX:7:1106:12219:336612	100.00	74	0	0	1	74	1640	1713	4e-35	137
HWI-ST942:56:C4CFMACXX:7:1106:12219:336612	100.00	28	0	0	73	100	106039	106012	1e-09	52.8
HWI-ST942:56:C4CFMACXX:7:1106:15564:477442	100.00	65	0	0	1	65	127630	127694	4e-30	121
HWI-ST942:56:C4CFMACXX:7:1106:15564:477442	100.00	44	0	0	57	100	103587	103630	2e-18	82.4
HWI-ST942:56:C4CFMACXX:7:1106:17494:870842	100.00	28	0	0	1	28	118444	118417	1e-09	52.8
HWI-ST942:56:C4CFMACXX:7:1106:17494:870842	100.00	69	0	0	28	96	116688	116620	2e-32	128
HWI-ST942:56:C4CFMACXX:7:1106:17631:302652	97.50	80	1	1	1	80	119048	118970	1e-34	135
HWI-ST942:56:C4CFMACXX:7:1106:17631:302652	100.00	31	0	0	69	99	118926	118956	3e-11	58.4
HWI-ST942:56:C4CFMACXX:7:1106:20524:190532	97.67	43	0	1	1	43	84582	84623	1e-15	73.1
HWI-ST942:56:C4CFMACXX:7:1106:20524:190532	100.00	70	0	0	30	99	11210	11279	6e-33	130
HWI-ST942:56:C4CFMACXX:7:1106:3257:941471	100.00	36	0	0	1	36	85578	85613	5e-14	67.6
HWI-ST942:56:C4CFMACXX:7:1106:3257:941471	100.00	69	0	0	32	100	84563	84631	2e-32	128
HWI-ST942:56:C4CFMACXX:7:1106:3981:389571	100.00	28	0	0	1	28	3387	3360	1e-09	52.8
HWI-ST942:56:C4CFMACXX:7:1106:3981:389571	100.00	71	0	0	29	99	3359	3429	2e-33	132
HWI-ST942:56:C4CFMACXX:7:1106:4223:540082	93.85	65	3	1	1	64	79150	79086	6e-23	97.1
HWI-ST942:56:C4CFMACXX:7:1106:4223:540082	100.00	55	0	0	46	100	79474	79420	1e-24	102
HWI-ST942:56:C4CFMACXX:7:1106:4333:110401	100.00	81	0	0	1	81	97794	97874	5e-39	150
HWI-ST942:56:C4CFMACXX:7:1106:4333:110401	100.00	20	0	0	81	100	46285	46266	4e-05	38.1
HWI-ST942:56:C4CFMACXX:7:1106:4733:907422	97.44	39	0	1	1	38	99398	99360	2e-13	65.8
HWI-ST942:56:C4CFMACXX:7:1106:4733:907422	100.00	69	0	0	32	100	99285	99353	2e-32	128
HWI-ST942:56:C4CFMACXX:7:1106:6272:526551	100.00	77	0	0	1	77	36709	36633	8e-37	143
HWI-ST942:56:C4CFMACXX:7:1106:6272:526551	100.00	26	0	0	75	100	100403	100378	2e-08	49.1
HWI-ST942:56:C4CFMACXX:7:1106:8984:612562	100.00	66	0	0	1	66	38674	38609	1e-30	122
HWI-ST942:56:C4CFMACXX:7:1106:8984:612562	100.00	32	0	0	65	96	22890	22859	8e-12	60.2
HWI-ST942:56:C4CFMACXX:7:1107:10320:322502	100.00	41	0	0	1	41	56014	55974	8e-17	76.8
HWI-ST942:56:C4CFMACXX:7:1107:10320:322502	100.00	59	0	0	41	99	57313	57371	8e-27	110
HWI-ST942:56:C4CFMACXX:7:1107:13596:214432	98.80	83	1	0	1	83	29365	29283	2e-38	148
HWI-ST942:56:C4CFMACXX:7:1107:13596:214432	100.00	30	0	0	71	100	99205	99234	1e-10	56.5
HWI-ST942:56:C4CFMACXX:7:1107:15508:406481	96.88	64	2	0	1	64	100158	100221	3e-26	108
HWI-ST942:56:C4CFMACXX:7:1107:15508:406481	97.83	46	0	1	55	100	82411	82455	2e-17	78.7
HWI-ST942:56:C4CFMACXX:7:1107:1607:53451	100.00	39	0	0	1	39	96735	96697	1e-15	73.1
HWI-ST942:56:C4CFMACXX:7:1107:1607:53451	98.55	69	1	0	32	100	96726	96794	1e-30	122
HWI-ST942:56:C4CFMACXX:7:1107:16104:146681	100.00	72	0	0	1	72	50809	50880	5e-34	134
HWI-ST942:56:C4CFMACXX:7:1107:16104:146681	100.00	28	0	0	73	100	79553	79580	1e-09	52.8
HWI-ST942:56:C4CFMACXX:7:1107:17517:391941	98.72	78	1	0	1	78	100640	100563	1e-35	139
HWI-ST942:56:C4CFMACXX:7:1107:17517:391941	96.00	25	0	1	71	95	17057	17080	1e-05	39.9
HWI-ST942:56:C4CFMACXX:7:1107:19121:438162	100.00	57	0	0	1	57	85519	85463	1e-25	106
HWI-ST942:56:C4CFMACXX:7:1107:19121:438162	100.00	46	0	0	55	100	127304	127259	1e-19	86.1
HWI-ST942:56:C4CFMACXX:7:1107:2245:825222	100.00	67	0	0	1	67	94133	94067	3e-31	124
HWI-ST942:56:C4CFMACXX:7:1107:2245:825222	100.00	32	0	0	66	97	115540	115509	8e-12	60.2
HWI-ST942:56:C4CFMACXX:7:1107:3881:542591	100.00	24	0	0	1	24	44785	44808	2e-07	45.4
HWI-ST942:56:C4CFMACXX:7:1107:3881:542591	100.00	76	0	0	25	100	38054	37979	3e-36	141
HWI-ST942:56:C4CFMACXX:7:1108:13117:864262	100.00	35	0	0	1	35	109759	109725	2e-13	65.8
HWI-ST942:56:C4CFMACXX:7:1108:13117:864262	100.00	63	0	0	36	98	108376	108314	5e-29	117
HWI-ST942:56:C4CFMACXX:7:1108:13982:142792	100.00	82	0	0	1	82	72386	72467	1e-39	152
HWI-ST942:56:C4CFMACXX:7:1108:13982:142792	100.00	20	0	0	81	100	126453	126434	4e-05	38.1
HWI-ST942:56:C4CFMACXX:7:1108:16349:212301	98.72	78	0	1	1	78	61242	61318	3e-35	137
HWI-ST942:56:C4CFMACXX:7:1108:16349:212301	100.00	24	0	0	73	96	88982	88959	2e-07	45.4
HWI-ST942:56:C4CFMACXX:7:1108:1739:425181	97.30	37	1	0	1	37	44924	44960	5e-13	63.9
HWI-ST942:56:C4CFMACXX:7:1108:1739:425181	100.00	42	0	0	35	76	44983	44942	2e-17	78.7
HWI-ST942:56:C4CFMACXX:7:1108:1739:425182	100.00	42	0	0	1	42	44942	44983	2e-17	78.7
HWI-ST942:56:C4CFMACXX:7:1108:1739:425182	97.30	37	1	0	40	76	44960	44924	5e-13	63.9
HWI-ST942:56:C4CFMACXX:7:1108:17983:229752	97.22	36	1	0	1	36	106089	106124	2e-12	62.1
HWI-ST942:56:C4CFMACXX:7:1108:17983:229752	100.00	70	0	0	29	98	106192	106123	6e-33	130
HWI-ST942:56:C4CFMACXX:7:1108:18248:412682	100.00	67	0	0	1	67	11019	11085	3e-31	124
HWI-ST942:56:C4CFMACXX:7:1108:18248:412682	100.00	38	0	0	63	100	109787	109750	4e-15	71.3
HWI-ST942:56:C4CFMACXX:7:1108:18895:1005942	100.00	24	0	0	1	24	96249	96226	2e-07	45.4
HWI-ST942:56:C4CFMACXX:7:1108:18895:1005942	100.00	83	0	0	18	100	96165	96247	4e-40	154
HWI-ST942:56:C4CFMACXX:7:1108:19222:392922	100.00	23	0	0	1	23	88618	88596	8e-07	43.6
HWI-ST942:56:C4CFMACXX:7:1108:19222:392922	100.00	79	0	0	22	100	88580	88658	6e-38	147
HWI-ST942:56:C4CFMACXX:7:1108:1951:649511	100.00	69	0	0	1	69	19187	19119	2e-32	128
HWI-ST942:56:C4CFMACXX:7:1108:1951:649511	100.00	32	0	0	67	98	101947	101978	8e-12	60.2
HWI-ST942:56:C4CFMACXX:7:1108:19625:143792	100.00	76	0	0	1	76	45070	44995	3e-36	141
HWI-ST942:56:C4CFMACXX:7:1108:19625:143792	100.00	23	0	0	77	99	63765	63787	8e-07	43.6
HWI-ST942:56:C4CFMACXX:7:1108:19988:116272	100.00	40	0	0	1	40	92571	92532	3e-16	75.0
HWI-ST942:56:C4CFMACXX:7:1108:19988:116272	100.00	63	0	0	38	100	92442	92504	5e-29	117
HWI-ST942:56:C4CFMACXX:7:1108:3970:995812	96.67	30	0	1	1	29	44365	44336	2e-08	49.1
HWI-ST942:56:C4CFMACXX:7:1108:3970:995812	100.00	77	0	0	24	100	44317	44393	8e-37	143
HWI-ST942:56:C4CFMACXX:7:1108:4119:597141	100.00	68	0	0	1	68	125507	125574	7e-32	126
HWI-ST942:56:C4CFMACXX:7:1108:4119:597141	100.00	33	0	0	64	96	77448	77480	2e-12	62.1
HWI-ST942:56:C4CFMACXX:7:1108:4119:597142	100.00	83	0	0	1	83	77530	77448	4e-40	154
HWI-ST942:56:C4CFMACXX:7:1108:4119:597142	100.00	21	0	0	79	99	125574	125554	1e-05	39.9
HWI-ST942:56:C4CFMACXX:7:1108:4882:945632	100.00	80	0	0	1	80	68871	68950	2e-38	148
HWI-ST942:56:C4CFMACXX:7:1108:4882:945632	100.00	20	0	0	81	100	94688	94669	4e-05	38.1
HWI-ST942:56:C4CFMACXX:7:1109:13560:779312	100.00	83	0	0	1	83	86349	86431	4e-40	154
HWI-ST942:56:C4CFMACXX:7:1109:13560:779312	100.00	20	0	0	81	100	91475	91456	4e-05	38.1
HWI-ST942:56:C4CFMACXX:7:1109:14673:563572	93.02	43	1	1	1	41	22207	22249	2e-12	62.1
HWI-ST942:56:C4CFMACXX:7:1109:14673:563572	100.00	75	0	0	26	100	15702	15776	1e-35	139
HWI-ST942:56:C4CFMACXX:7:1109:17434:148552	100.00	45	0	0	1	45	94970	94926	5e-19	84.2
HWI-ST942:56:C4CFMACXX:7:1109:17434:148552	100.00	61	0	0	40	100	94848	94908	6e-28	113
HWI-ST942:56:C4CFMACXX:7:1109:18256:430752	100.00	62	0	0	1	62	46965	46904	2e-28	115
HWI-ST942:56:C4CFMACXX:7:1109:18256:430752	100.00	42	0	0	55	96	97386	97427	2e-17	78.7
HWI-ST942:56:C4CFMACXX:7:1109:18599:1002272	96.43	28	0	1	1	27	14482	14509	2e-07	45.4
HWI-ST942:56:C4CFMACXX:7:1109:18599:1002272	100.00	80	0	0	20	99	14573	14494	2e-38	148
HWI-ST942:56:C4CFMACXX:7:1109:19241:278671	100.00	76	0	0	1	76	30436	30511	3e-36	141
HWI-ST942:56:C4CFMACXX:7:1109:19241:278671	100.00	22	0	0	74	95	108879	108900	3e-06	41.7
HWI-ST942:56:C4CFMACXX:7:1109:20247:809291	98.75	80	0	1	1	80	29630	29708	3e-36	141
HWI-ST942:56:C4CFMACXX:7:1109:20247:809291	100.00	28	0	0	72	99	104904	104877	1e-09	52.8
HWI-ST942:56:C4CFMACXX:7:1109:21145:393772	91.67	48	2	2	1	47	108568	108522	2e-13	65.8
HWI-ST942:56:C4CFMACXX:7:1109:21145:393772	100.00	76	0	0	25	100	108522	108597	3e-36	141
HWI-ST942:56:C4CFMACXX:7:1109:21186:129892	98.57	70	1	0	1	70	72590	72659	3e-31	124
HWI-ST942:56:C4CFMACXX:7:1109:21186:129892	94.59	37	2	0	64	100	92248	92212	3e-11	58.4
HWI-ST942:56:C4CFMACXX:7:1109:21256:520371	100.00	67	0	0	1	67	109334	109400	3e-31	124
HWI-ST942:56:C4CFMACXX:7:1109:21256:520371	100.00	34	0	0	67	100	125581	125614	6e-13	63.9
HWI-ST942:56:C4CFMACXX:7:1109:2357:663041	98.57	70	1	0	1	70	126921	126852	3e-31	124
HWI-ST942:56:C4CFMACXX:7:1109:2357:663041	95.24	42	2	0	59	100	127002	126961	5e-14	67.6
HWI-ST942:56:C4CFMACXX:7:1109:4193:347092	100.00	28	0	0	1	28	84894	84921	1e-09	52.8
HWI-ST942:56:C4CFMACXX:7:1109:4193:347092	100.00	78	0	0	20	97	85814	85891	2e-37	145
HWI-ST942:56:C4CFMACXX:7:1110:10394:227612	96.49	57	2	0	1	57	68831	68775	2e-22	95.3
HWI-ST942:56:C4CFMACXX:7:1110:10394:227612	100.00	53	0	0	48	100	68684	68736	2e-23	99.0
HWI-ST942:56:C4CFMACXX:7:1110:12193:892291	100.00	59	0	0	1	59	96614	96556	8e-27	110
HWI-ST942:56:C4CFMACXX:7:1110:12193:892291	91.53	59	4	1	41	99	41614	41557	6e-18	80.5
HWI-ST942:56:C4CFMACXX:7:1110:19025:667092	100.00	27	0	0	1	27	96066	96092	5e-09	51.0
HWI-ST942:56:C4CFMACXX:7:1110:19025:667092	100.00	77	0	0	22	98	96162	96086	8e-37	143
HWI-ST942:56:C4CFMACXX:7:1110:19092:803022	100.00	39	0	0	1	39	19210	19172	1e-15	73.1
HWI-ST942:56:C4CFMACXX:7:1110:19092:803022	98.51	67	1	0	34	100	102488	102554	1e-29	119
HWI-ST942:56:C4CFMACXX:7:1110:20540:657041	100.00	76	0	0	1	76	10724	10649	3e-36	141
HWI-ST942:56:C4CFMACXX:7:1110:20540:657041	100.00	27	0	0	74	100	115940	115914	5e-09	51.0
HWI-ST942:56:C4CFMACXX:7:1110:21348:646112	100.00	81	0	0	1	81	2309	2389	5e-39	150
HWI-ST942:56:C4CFMACXX:7:1110:21348:646112	84.09	44	3	3	59	100	70853	70894	1e-05	39.9
HWI-ST942:56:C4CFMACXX:7:1110:2537:428582	100.00	54	0	0	1	54	69288	69341	5e-24	100
HWI-ST942:56:C4CFMACXX:7:1110:2537:428582	100.00	47	0	0	53	99	69338	69292	4e-20	87.9
HWI-ST942:56:C4CFMACXX:7:1110:3746:642752	100.00	29	0	0	1	29	13347	13375	4e-10	54.7
HWI-ST942:56:C4CFMACXX:7:1110:3746:642752	100.00	75	0	0	26	100	13473	13399	1e-35	139
HWI-ST942:56:C4CFMACXX:7:1110:3750:823992	97.67	43	1	0	1	43	93129	93087	3e-16	75.0
HWI-ST942:56:C4CFMACXX:7:1110:3750:823992	100.00	58	0	0	41	98	93074	93131	3e-26	108
HWI-ST942:56:C4CFMACXX:7:1110:4216:50172	100.00	27	0	0	1	27	61746	61772	5e-09	51.0
HWI-ST942:56:C4CFMACXX:7:1110:4216:50172	100.00	78	0	0	22	99	61795	61718	2e-37	145
HWI-ST942:56:C4CFMACXX:7:1110:6852:324082	100.00	25	0	0	1	25	65402	65378	6e-08	47.3
HWI-ST942:56:C4CFMACXX:7:1110:6852:324082	98.84	86	1	0	15	100	65356	65441	4e-40	154
HWI-ST942:56:C4CFMACXX:7:1110:7828:901891	100.00	49	0	0	1	49	82743	82791	3e-21	91.6
HWI-ST942:56:C4CFMACXX:7:1110:7828:901891	91.11	90	4	3	8	96	124648	124734	1e-29	119
HWI-ST942:56:C4CFMACXX:7:1110:7861:109012	96.47	85	1	1	1	83	103209	103293	1e-35	139
HWI-ST942:56:C4CFMACXX:7:1110:7861:109012	100.00	32	0	0	69	100	975	944	8e-12	60.2
HWI-ST942:56:C4CFMACXX:7:1110:9071:31162	100.00	32	0	0	1	32	63550	63519	8e-12	60.2
HWI-ST942:56:C4CFMACXX:7:1110:9071:31162	100.00	73	0	0	27	99	63494	63566	1e-34	135
HWI-ST942:56:C4CFMACXX:7:1110:9321:891062	100.00	44	0	0	1	44	66457	66500	2e-18	82.4
HWI-ST942:56:C4CFMACXX:7:1110:9321:891062	98.36	61	1	0	39	99	66585	66525	3e-26	108
HWI-ST942:56:C4CFMACXX:7:1111:11145:706972	95.12	41	2	0	1	41	123956	123996	2e-13	65.8
HWI-ST942:56:C4CFMACXX:7:1111:11145:706972	100.00	72	0	0	29	100	124024	123953	5e-34	134
HWI-ST942:56:C4CFMACXX:7:1111:1278:581742	100.00	37	0	0	1	37	122244	122208	1e-14	69.4
HWI-ST942:56:C4CFMACXX:7:1111:1278:581742	98.44	64	1	0	36	99	122173	122236	6e-28	113
HWI-ST942:56:C4CFMACXX:7:1111:15088:168332	97.56	82	2	0	1	82	91131	91050	3e-36	141
HWI-ST942:56:C4CFMACXX:7:1111:15088:168332	100.00	24	0	0	74	97	116322	116345	2e-07	45.4
HWI-ST942:56:C4CFMACXX:7:1111:1689:878182	100.00	31	0	0	1	31	26715	26685	3e-11	58.4
HWI-ST942:56:C4CFMACXX:7:1111:1689:878182	100.00	73	0	0	26	98	26648	26720	1e-34	135
HWI-ST942:56:C4CFMACXX:7:1111:1938:571071	100.00	69	0	0	1	69	120107	120175	2e-32	128
HWI-ST942:56:C4CFMACXX:7:1111:1938:571071	100.00	32	0	0	68	99	99463	99432	8e-12	60.2
HWI-ST942:56:C4CFMACXX:7:1111:3284:489032	93.33	30	2	0	1	30	82488	82517	2e-07	45.4
HWI-ST942:56:C4CFMACXX:7:1111:3284:489032	100.00	79	0	0	21	99	112381	112303	6e-38	147
HWI-ST942:56:C4CFMACXX:7:1111:3536:711281	100.00	34	0	0	1	34	78934	78967	6e-13	63.9
HWI-ST942:56:C4CFMACXX:7:1111:3536:711281	98.57	70	0	1	31	100	66606	66538	1e-30	122
HWI-ST942:56:C4CFMACXX:7:1111:4007:423081	98.21	56	1	0	1	56	68405	68350	2e-23	99.0
HWI-ST942:56:C4CFMACXX:7:1111:4007:423081	100.00	46	0	0	53	98	1494	1539	1e-19	86.1
HWI-ST942:56:C4CFMACXX:7:1111:4980:644542	100.00	67	0	0	1	67	1606	1540	3e-31	124
HWI-ST942:56:C4CFMACXX:7:1111:4980:644542	100.00	35	0	0	66	100	92557	92591	2e-13	65.8
HWI-ST942:56:C4CFMACXX:7:1111:5563:725602	100.00	70	0	0	1	70	14611	14680	6e-33	130
HWI-ST942:56:C4CFMACXX:7:1111:5563:725602	100.00	38	0	0	63	100	35163	35126	4e-15	71.3
HWI-ST942:56:C4CFMACXX:7:1111:5983:671272	100.00	60	0	0	1	60	2114	2173	2e-27	111
HWI-ST942:56:C4CFMACXX:7:1111:5983:671272	100.00	40	0	0	61	100	100175	100136	3e-16	75.0
HWI-ST942:56:C4CFMACXX:7:1111:6834:714631	100.00	80	0	0	1	80	110123	110044	2e-38	148
HWI-ST942:56:C4CFMACXX:7:1111:6834:714631	100.00	22	0	0	79	100	99746	99725	3e-06	41.7
HWI-ST942:56:C4CFMACXX:7:1111:7001:895502	94.12	34	1	1	1	33	123613	123580	5e-09	51.0
HWI-ST942:56:C4CFMACXX:7:1111:7001:895502	96.55	87	2	1	15	100	123580	123666	8e-37	143
HWI-ST942:56:C4CFMACXX:7:1111:7754:973322	100.00	38	0	0	1	38	107866	107903	4e-15	71.3
HWI-ST942:56:C4CFMACXX:7:1111:7754:973322	100.00	70	0	0	31	100	104221	104290	6e-33	130
HWI-ST942:56:C4CFMACXX:7:1111:8496:614672	96.77	62	1	1	1	62	104866	104926	1e-24	102
HWI-ST942:56:C4CFMACXX:7:1111:8496:614672	100.00	43	0	0	48	90	104746	104788	6e-18	80.5
HWI-ST942:56:C4CFMACXX:7:1111:9081:135111	98.63	73	1	0	1	73	51724	51796	6e-33	130
HWI-ST942:56:C4CFMACXX:7:1111:9081:135111	100.00	28	0	0	73	100	126351	126378	1e-09	52.8
HWI-ST942:56:C4CFMACXX:7:1111:9237:302011	100.00	28	0	0	1	28	83000	82973	1e-09	52.8
HWI-ST942:56:C4CFMACXX:7:1111:9237:302011	100.00	72	0	0	29	100	82972	83043	5e-34	134
HWI-ST942:56:C4CFMACXX:7:1112:11342:33832	100.00	55	0	0	1	55	74494	74548	1e-24	102
HWI-ST942:56:C4CFMACXX:7:1112:11342:33832	98.28	58	0	1	43	100	65652	65708	5e-24	100
HWI-ST942:56:C4CFMACXX:7:1112:13089:48521	100.00	67	0	0	1	67	16609	16543	3e-31	124
HWI-ST942:56:C4CFMACXX:7:1112:13089:48521	100.00	47	0	0	54	100	93568	93614	4e-20	87.9
HWI-ST942:56:C4CFMACXX:7:1112:13790:311521	100.00	70	0	0	1	70	84545	84614	6e-33	130
HWI-ST942:56:C4CFMACXX:7:1112:13790:311521	100.00	32	0	0	69	100	106585	106554	8e-12	60.2
HWI-ST942:56:C4CFMACXX:7:1112:15269:132881	100.00	85	0	0	1	85	32819	32735	3e-41	158
HWI-ST942:56:C4CFMACXX:7:1112:15269:132881	100.00	23	0	0	78	100	94599	94577	8e-07	43.6
HWI-ST942:56:C4CFMACXX:7:1112:15269:132882	100.00	85	0	0	1	85	94515	94599	3e-41	158
HWI-ST942:56:C4CFMACXX:7:1112:15269:132882	100.00	23	0	0	78	100	32735	32757	8e-07	43.6
HWI-ST942:56:C4CFMACXX:7:1112:17962:870511	100.00	82	0	0	1	82	69767	69686	1e-39	152
HWI-ST942:56:C4CFMACXX:7:1112:17962:870511	93.55	31	0	2	70	99	73938	73909	2e-07	45.4
HWI-ST942:56:C4CFMACXX:7:1112:2608:744071	100.00	37	0	0	1	37	65947	65911	1e-14	69.4
HWI-ST942:56:C4CFMACXX:7:1112:2608:744071	100.00	63	0	0	38	100	90233	90171	5e-29	117
HWI-ST942:56:C4CFMACXX:7:1112:3662:661241	98.77	81	1	0	1	81	9339	9259	2e-37	145
HWI-ST942:56:C4CFMACXX:7:1112:3662:661241	100.00	22	0	0	79	100	89679	89700	3e-06	41.7
HWI-ST942:56:C4CFMACXX:7:1112:4228:400542	100.00	73	0	0	1	73	97336	97408	1e-34	135
HWI-ST942:56:C4CFMACXX:7:1112:4228:400542	96.55	29	0	1	61	89	25684	25711	6e-08	47.3
HWI-ST942:56:C4CFMACXX:7:1112:6151:504362	98.78	82	1	0	1	82	14434	14515	6e-38	147
HWI-ST942:56:C4CFMACXX:7:1112:6151:504362	100.00	30	0	0	71	100	77214	77185	1e-10	56.5
HWI-ST942:56:C4CFMACXX:7:1112:6575:353692	96.00	25	1	0	2	26	688	664	3e-06	41.7
HWI-ST942:56:C4CFMACXX:7:1112:6575:353692	100.00	46	0	0	27	72	654	609	1e-19	86.1
HWI-ST942:56:C4CFMACXX:7:1112:6808:86712	97.56	41	1	0	1	41	23167	23207	4e-15	71.3
HWI-ST942:56:C4CFMACXX:7:1112:6808:86712	100.00	71	0	0	29	99	86680	86750	2e-33	132
HWI-ST942:56:C4CFMACXX:7:1113:13154:399521	100.00	67	0	0	1	67	98150	98084	3e-31	124
HWI-ST942:56:C4CFMACXX:7:1113:13154:399521	100.00	35	0	0	66	100	97079	97045	2e-13	65.8
HWI-ST942:56:C4CFMACXX:7:1113:14776:616882	100.00	69	0	0	1	69	115877	115945	2e-32	128
HWI-ST942:56:C4CFMACXX:7:1113:14776:616882	100.00	31	0	0	69	99	16880	16850	3e-11	58.4
HWI-ST942:56:C4CFMACXX:7:1113:18875:614072	100.00	25	0	0	1	25	91064	91040	6e-08	47.3
HWI-ST942:56:C4CFMACXX:7:1113:18875:614072	100.00	91	0	0	10	100	90904	90994	1e-44	169
HWI-ST942:56:C4CFMACXX:7:1113:21098:222022	100.00	42	0	0	1	42	10991	11032	2e-17	78.7
HWI-ST942:56:C4CFMACXX:7:1113:21098:222022	100.00	69	0	0	32	100	40889	40821	2e-32	128
HWI-ST942:56:C4CFMACXX:7:1113:2917:941382	100.00	73	0	0	1	73	75428	75500	1e-34	135
HWI-ST942:56:C4CFMACXX:7:1113:2917:941382	100.00	28	0	0	71	98	79159	79132	1e-09	52.8
HWI-ST942:56:C4CFMACXX:7:1113:4283:751362	100.00	37	0	0	1	37	109354	109318	1e-14	69.4
HWI-ST942:56:C4CFMACXX:7:1113:4283:751362	100.00	69	0	0	31	99	109297	109365	2e-32	128
HWI-ST942:56:C4CFMACXX:7:1113:4867:449632	100.00	45	0	0	1	45	103189	103233	5e-19	84.2
HWI-ST942:56:C4CFMACXX:7:1113:4867:449632	100.00	72	0	0	28	99	104093	104164	5e-34	134
HWI-ST942:56:C4CFMACXX:7:1113:6815:358581	100.00	25	0	0	1	25	89887	89863	6e-08	47.3
HWI-ST942:56:C4CFMACXX:7:1113:6815:358581	100.00	85	0	0	16	100	26994	27078	3e-41	158
HWI-ST942:56:C4CFMACXX:7:1113:8326:982721	100.00	73	0	0	1	73	61865	61793	1e-34	135
HWI-ST942:56:C4CFMACXX:7:1113:8326:982721	100.00	29	0	0	71	99	15129	15157	4e-10	54.7
HWI-ST942:56:C4CFMACXX:7:1113:9167:181301	100.00	80	0	0	1	80	48999	48920	2e-38	148
HWI-ST942:56:C4CFMACXX:7:1113:9167:181301	93.55	31	1	1	70	99	46079	46109	2e-07	45.4
HWI-ST942:56:C4CFMACXX:7:1114:10472:576071	100.00	71	0	0	1	71	81038	80968	2e-33	132
HWI-ST942:56:C4CFMACXX:7:1114:10472:576071	100.00	32	0	0	69	100	6230	6261	8e-12	60.2
HWI-ST942:56:C4CFMACXX:7:1114:10974:310512	96.67	30	1	0	1	30	105630	105601	4e-09	51.0
HWI-ST942:56:C4CFMACXX:7:1114:10974:310512	100.00	69	0	0	24	92	105581	105649	2e-32	128
HWI-ST942:56:C4CFMACXX:7:1114:11320:675282	90.63	32	2	1	1	31	95181	95212	3e-06	41.7
HWI-ST942:56:C4CFMACXX:7:1114:11320:675282	100.00	81	0	0	20	100	95260	95180	5e-39	150
HWI-ST942:56:C4CFMACXX:7:1114:14251:261562	98.33	60	1	0	1	60	85254	85313	1e-25	106
HWI-ST942:56:C4CFMACXX:7:1114:14251:261562	98.00	50	1	0	48	97	85388	85339	4e-20	87.9
HWI-ST942:56:C4CFMACXX:7:1114:15137:941342	100.00	65	0	0	1	65	48720	48656	4e-30	121
HWI-ST942:56:C4CFMACXX:7:1114:15137:941342	100.00	35	0	0	66	100	73085	73051	2e-13	65.8
HWI-ST942:56:C4CFMACXX:7:1114:15627:503831	100.00	70	0	0	1	70	109196	109127	6e-33	130
HWI-ST942:56:C4CFMACXX:7:1114:15627:503831	100.00	32	0	0	69	100	3458	3489	8e-12	60.2
HWI-ST942:56:C4CFMACXX:7:1114:17020:67782	88.52	61	6	1	1	61	25239	25298	1e-15	73.1
HWI-ST942:56:C4CFMACXX:7:1114:17020:67782	100.00	65	0	0	35	99	25305	25241	4e-30	121
HWI-ST942:56:C4CFMACXX:7:1114:17366:499142	100.00	27	0	0	1	27	45810	45784	5e-09	51.0
HWI-ST942:56:C4CFMACXX:7:1114:17366:499142	100.00	73	0	0	27	99	45735	45807	1e-34	135
HWI-ST942:56:C4CFMACXX:7:1114:17566:779591	100.00	74	0	0	1	74	88655	88728	4e-35	137
HWI-ST942:56:C4CFMACXX:7:1114:17566:779591	100.00	29	0	0	72	100	88571	88599	4e-10	54.7
HWI-ST942:56:C4CFMACXX:7:1114:17566:779592	98.46	65	1	0	1	65	88635	88571	2e-28	115
HWI-ST942:56:C4CFMACXX:7:1114:17566:779592	94.59	37	2	0	63	99	88728	88692	3e-11	58.4
HWI-ST942:56:C4CFMACXX:7:1114:17994:528321	93.62	47	2	1	1	47	14022	13977	1e-14	69.4
HWI-ST942:56:C4CFMACXX:7:1114:17994:528321	100.00	69	0	0	32	100	21687	21619	2e-32	128
HWI-ST942:56:C4CFMACXX:7:1114:18311:544671	100.00	39	0	0	1	39	86762	86800	1e-15	73.1
HWI-ST942:56:C4CFMACXX:7:1114:18311:544671	100.00	57	0	0	40	96	86801	86745	1e-25	106
HWI-ST942:56:C4CFMACXX:7:1114:20451:275612	96.55	29	1	0	1	29	81415	81387	2e-08	49.1
HWI-ST942:56:C4CFMACXX:7:1114:20451:275612	100.00	74	0	0	26	99	81346	81419	4e-35	137
HWI-ST942:56:C4CFMACXX:7:1114:20550:830831	100.00	82	0	0	1	82	21667	21586	1e-39	152
HWI-ST942:56:C4CFMACXX:7:1114:20550:830831	100.00	20	0	0	81	100	75274	75293	4e-05	38.1
HWI-ST942:56:C4CFMACXX:7:1114:3801:77152	100.00	72	0	0	1	72	9266	9195	4e-34	134
HWI-ST942:56:C4CFMACXX:7:1114:3801:77152	100.00	26	0	0	70	95	90065	90040	2e-08	49.1
HWI-ST942:56:C4CFMACXX:7:1114:5630:406132	98.18	55	1	0	1	55	89935	89989	6e-23	97.1
HWI-ST942:56:C4CFMACXX:7:1114:5630:406132	100.00	53	0	0	47	99	90028	89976	2e-23	99.0
HWI-ST942:56:C4CFMACXX:7:1114:7775:233482	100.00	29	0	0	1	29	48640	48612	4e-10	54.7
HWI-ST942:56:C4CFMACXX:7:1114:7775:233482	100.00	77	0	0	23	99	48527	48603	8e-37	143
HWI-ST942:56:C4CFMACXX:7:1114:9849:186532	100.00	76	0	0	1	76	96909	96834	3e-36	141
HWI-ST942:56:C4CFMACXX:7:1114:9849:186532	100.00	24	0	0	73	96	96814	96837	2e-07	45.4
HWI-ST942:56:C4CFMACXX:7:1115:11349:217232	88.89	36	4	0	1	36	117260	117225	2e-07	45.4
HWI-ST942:56:C4CFMACXX:7:1115:11349:217232	98.81	84	1	0	17	100	117225	117308	5e-39	150
HWI-ST942:56:C4CFMACXX:7:1115:15231:103971	100.00	72	0	0	1	72	84905	84976	5e-34	134
HWI-ST942:56:C4CFMACXX:7:1115:15231:103971	100.00	28	0	0	70	97	54597	54624	1e-09	52.8
HWI-ST942:56:C4CFMACXX:7:1115:15636:395382	97.44	78	1	1	1	77	78864	78941	2e-33	132
HWI-ST942:56:C4CFMACXX:7:1115:15636:395382	100.00	35	0	0	66	100	86627	86661	2e-13	65.8
HWI-ST942:56:C4CFMACXX:7:1115:15807:831332	100.00	39	0	0	1	39	85693	85655	1e-15	73.1
HWI-ST942:56:C4CFMACXX:7:1115:15807:831332	100.00	69	0	0	32	100	85534	85602	2e-32	128
HWI-ST942:56:C4CFMACXX:7:1115:16921:748841	100.00	35	0	0	1	35	110291	110325	2e-13	65.8
HWI-ST942:56:C4CFMACXX:7:1115:16921:748841	100.00	65	0	0	35	99	110128	110192	4e-30	121
HWI-ST942:56:C4CFMACXX:7:1115:17276:76252	98.44	64	1	0	1	64	95000	95063	6e-28	113
HWI-ST942:56:C4CFMACXX:7:1115:17276:76252	100.00	40	0	0	58	97	40212	40173	3e-16	75.0
HWI-ST942:56:C4CFMACXX:7:1115:18872:938222	100.00	47	0	0	1	47	74681	74635	4e-20	87.9
HWI-ST942:56:C4CFMACXX:7:1115:18872:938222	100.00	52	0	0	48	99	74635	74686	6e-23	97.1
HWI-ST942:56:C4CFMACXX:7:1115:20995:318492	96.15	26	1	0	1	26	85724	85749	8e-07	43.6
HWI-ST942:56:C4CFMACXX:7:1115:20995:318492	100.00	80	0	0	21	100	85809	85730	2e-38	148
HWI-ST942:56:C4CFMACXX:7:1115:3472:765192	98.36	61	1	0	1	61	126870	126810	3e-26	108
HWI-ST942:56:C4CFMACXX:7:1115:3472:765192	100.00	47	0	0	53	99	108807	108853	4e-20	87.9
HWI-ST942:56:C4CFMACXX:7:1115:5992:452811	100.00	80	0	0	1	80	76865	76786	2e-38	148
HWI-ST942:56:C4CFMACXX:7:1115:5992:452811	96.30	27	1	0	72	98	29220	29246	2e-07	45.4
HWI-ST942:56:C4CFMACXX:7:1115:8422:531462	100.00	56	0	0	1	56	122484	122429	4e-25	104
HWI-ST942:56:C4CFMACXX:7:1115:8422:531462	100.00	44	0	0	56	99	2552	2595	2e-18	82.4
HWI-ST942:56:C4CFMACXX:7:1115:9274:887741	100.00	72	0	0	1	72	124661	124590	5e-34	134
HWI-ST942:56:C4CFMACXX:7:1115:9274:887741	100.00	31	0	0	70	100	92942	92972	3e-11	58.4
HWI-ST942:56:C4CFMACXX:7:1116:10389:654892	93.94	66	1	2	1	66	65670	65732	6e-23	97.1
HWI-ST942:56:C4CFMACXX:7:1116:10389:654892	100.00	52	0	0	49	100	65738	65687	6e-23	97.1
HWI-ST942:56:C4CFMACXX:7:1116:11192:80622	97.56	41	1	0	1	41	5140	5100	4e-15	71.3
HWI-ST942:56:C4CFMACXX:7:1116:11192:80622	100.00	68	0	0	33	100	93941	94008	8e-32	126
HWI-ST942:56:C4CFMACXX:7:1116:11773:58421	100.00	80	0	0	1	80	108244	108323	2e-38	148
HWI-ST942:56:C4CFMACXX:7:1116:11773:58421	100.00	20	0	0	81	100	87733	87752	4e-05	38.1
HWI-ST942:56:C4CFMACXX:7:1116:13221:658451	100.00	73	0	0	1	73	20477	20405	1e-34	135
HWI-ST942:56:C4CFMACXX:7:1116:13221:658451	100.00	29	0	0	72	100	9879	9851	4e-10	54.7
HWI-ST942:56:C4CFMACXX:7:1116:13500:985591	100.00	33	0	0	1	33	85199	85167	2e-12	62.1
HWI-ST942:56:C4CFMACXX:7:1116:13500:985591	100.00	67	0	0	34	100	85167	85233	3e-31	124
HWI-ST942:56:C4CFMACXX:7:1116:13786:419712	98.72	78	1	0	1	78	10565	10488	1e-35	139
HWI-ST942:56:C4CFMACXX:7:1116:13786:419712	100.00	24	0	0	77	100	65736	65759	2e-07	45.4
HWI-ST942:56:C4CFMACXX:7:1116:13954:555172	97.78	45	1	0	1	45	75859	75903	2e-17	78.7
HWI-ST942:56:C4CFMACXX:7:1116:13954:555172	100.00	59	0	0	41	99	75936	75878	8e-27	110
HWI-ST942:56:C4CFMACXX:7:1116:15667:767631	100.00	37	0	0	1	37	45096	45132	1e-14	69.4
HWI-ST942:56:C4CFMACXX:7:1116:15667:767631	100.00	55	0	0	38	92	45134	45080	1e-24	102
HWI-ST942:56:C4CFMACXX:7:1116:16566:297261	100.00	50	0	0	1	50	99674	99625	8e-22	93.5
HWI-ST942:56:C4CFMACXX:7:1116:16566:297261	100.00	47	0	0	50	96	122716	122762	4e-20	87.9
HWI-ST942:56:C4CFMACXX:7:1116:16566:297262	100.00	68	0	0	1	68	122783	122716	8e-32	126
HWI-ST942:56:C4CFMACXX:7:1116:16566:297262	100.00	33	0	0	68	100	99625	99657	2e-12	62.1
HWI-ST942:56:C4CFMACXX:7:1116:16748:458291	98.55	69	0	1	1	68	67225	67157	4e-30	121
HWI-ST942:56:C4CFMACXX:7:1116:16748:458291	100.00	21	0	0	73	93	59387	59407	1e-05	39.9
HWI-ST942:56:C4CFMACXX:7:1116:16762:705562	100.00	46	0	0	1	46	18481	18436	1e-19	86.1
HWI-ST942:56:C4CFMACXX:7:1116:16762:705562	100.00	60	0	0	41	100	18391	18450	2e-27	111
HWI-ST942:56:C4CFMACXX:7:1116:17255:561512	94.52	73	2	2	1	72	24713	24642	2e-27	111
HWI-ST942:56:C4CFMACXX:7:1116:17255:561512	100.00	52	0	0	49	100	24640	24691	6e-23	97.1
HWI-ST942:56:C4CFMACXX:7:1116:17319:504072	100.00	22	0	0	1	22	36190	36169	3e-06	41.7
HWI-ST942:56:C4CFMACXX:7:1116:17319:504072	100.00	85	0	0	16	100	99201	99285	3e-41	158
HWI-ST942:56:C4CFMACXX:7:1116:21263:382251	100.00	33	0	0	1	33	54959	54927	2e-12	62.1
HWI-ST942:56:C4CFMACXX:7:1116:21263:382251	100.00	67	0	0	34	100	58953	58887	3e-31	124
HWI-ST942:56:C4CFMACXX:7:1116:3327:611801	100.00	77	0	0	1	77	121609	121533	8e-37	143
HWI-ST942:56:C4CFMACXX:7:1116:3327:611801	89.74	39	2	2	64	100	93191	93229	2e-08	49.1
HWI-ST942:56:C4CFMACXX:7:1116:3327:611802	95.40	87	2	2	1	85	93277	93191	4e-35	137
HWI-ST942:56:C4CFMACXX:7:1116:3327:611802	100.00	29	0	0	72	100	121533	121561	4e-10	54.7
HWI-ST942:56:C4CFMACXX:7:1116:9528:133492	100.00	31	0	0	1	31	59499	59469	3e-11	58.4
HWI-ST942:56:C4CFMACXX:7:1116:9528:133492	100.00	80	0	0	20	99	59390	59469	2e-38	148
HWI-ST942:56:C4CFMACXX:7:1201:11914:802662	100.00	27	0	0	1	27	61334	61360	5e-09	51.0
HWI-ST942:56:C4CFMACXX:7:1201:11914:802662	100.00	81	0	0	20	100	61381	61301	5e-39	150
HWI-ST942:56:C4CFMACXX:7:1201:12236:796672	96.55	87	0	2	1	87	29526	29443	3e-36	141
HWI-ST942:56:C4CFMACXX:7:1201:12236:796672	100.00	26	0	0	72	97	65218	65193	2e-08	49.1
HWI-ST942:56:C4CFMACXX:7:1201:16865:328131	100.00	81	0	0	1	81	113081	113161	5e-39	150
HWI-ST942:56:C4CFMACXX:7:1201:16865:328131	90.24	41	1	2	62	99	65407	65447	5e-09	51.0
HWI-ST942:56:C4CFMACXX:7:1201:16865:328132	95.35	86	1	2	1	83	65492	65407	5e-34	134
HWI-ST942:56:C4CFMACXX:7:1201:16865:328132	100.00	37	0	0	64	100	113161	113125	1e-14	69.4
HWI-ST942:56:C4CFMACXX:7:1201:17084:303912	97.87	47	1	0	1	47	97746	97792	2e-18	82.4
HWI-ST942:56:C4CFMACXX:7:1201:17084:303912	100.00	63	0	0	37	99	85628	85690	5e-29	117
HWI-ST942:56:C4CFMACXX:7:1201:18489:965122	100.00	58	0	0	1	58	103786	103729	3e-26	108
HWI-ST942:56:C4CFMACXX:7:1201:18489:965122	100.00	44	0	0	57	100	98382	98339	2e-18	82.4
HWI-ST942:56:C4CFMACXX:7:1201:19696:322032	100.00	75	0	0	1	75	39366	39440	1e-35	139
HWI-ST942:56:C4CFMACXX:7:1201:19696:322032	100.00	27	0	0	73	99	99516	99542	5e-09	51.0
HWI-ST942:56:C4CFMACXX:7:1201:2104:33492	97.44	39	0	1	1	38	78142	78104	2e-13	65.8
HWI-ST942:56:C4CFMACXX:7:1201:2104:33492	96.83	63	2	0	34	96	78066	78128	1e-25	106
HWI-ST942:56:C4CFMACXX:7:1201:3587:683082	96.00	25	1	0	1	25	26373	26397	3e-06	41.7
HWI-ST942:56:C4CFMACXX:7:1201:3587:683082	100.00	81	0	0	19	99	26416	26336	5e-39	150
HWI-ST942:56:C4CFMACXX:7:1201:7136:397162	94.87	78	3	1	1	78	61026	61102	4e-30	121
HWI-ST942:56:C4CFMACXX:7:1201:7136:397162	100.00	45	0	0	56	100	27487	27531	5e-19	84.2
HWI-ST942:56:C4CFMACXX:7:1202:10914:1004151	100.00	49	0	0	1	49	27502	27550	3e-21	91.6
HWI-ST942:56:C4CFMACXX:7:1202:10914:1004151	100.00	53	0	0	48	100	90069	90017	2e-23	99.0
HWI-ST942:56:C4CFMACXX:7:1202:13983:462601	100.00	43	0	0	1	43	124318	124276	6e-18	80.5
HWI-ST942:56:C4CFMACXX:7:1202:13983:462601	93.59	78	5	0	19	96	112246	112323	4e-29	117
HWI-ST942:56:C4CFMACXX:7:1202:14555:946592	100.00	60	0	0	1	60	107192	107251	2e-27	111
HWI-ST942:56:C4CFMACXX:7:1202:14555:946592	100.00	42	0	0	59	100	45955	45914	2e-17	78.7
HWI-ST942:56:C4CFMACXX:7:1202:14875:79031	100.00	73	0	0	1	73	64869	64941	1e-34	135
HWI-ST942:56:C4CFMACXX:7:1202:14875:79031	100.00	25	0	0	72	96	16540	16564	6e-08	47.3
HWI-ST942:56:C4CFMACXX:7:1202:15657:750002	100.00	26	0	0	1	26	59592	59617	2e-08	49.1
HWI-ST942:56:C4CFMACXX:7:1202:15657:750002	100.00	74	0	0	27	100	56748	56675	4e-35	137
HWI-ST942:56:C4CFMACXX:7:1202:17637:831191	100.00	77	0	0	1	77	24756	24832	8e-37	143
HWI-ST942:56:C4CFMACXX:7:1202:17637:831191	100.00	27	0	0	74	100	126728	126702	5e-09	51.0
HWI-ST942:56:C4CFMACXX:7:1202:18339:739662	100.00	65	0	0	1	65	2739	2675	4e-30	121
HWI-ST942:56:C4CFMACXX:7:1202:18339:739662	100.00	37	0	0	64	100	15114	15150	1e-14	69.4
HWI-ST942:56:C4CFMACXX:7:1202:19790:803851	96.00	25	1	0	1	25	11635	11611	3e-06	41.7
HWI-ST942:56:C4CFMACXX:7:1202:19790:803851	97.59	83	2	0	18	100	11611	11693	8e-37	143
HWI-ST942:56:C4CFMACXX:7:1202:7260:547912	94.94	79	3	1	1	78	63679	63757	1e-30	122
HWI-ST942:56:C4CFMACXX:7:1202:7260:547912	95.74	47	1	1	55	100	63757	63711	3e-16	75.0
HWI-ST942:56:C4CFMACXX:7:1203:12641:654362	97.30	37	1	0	1	37	120789	120825	6e-13	63.9
HWI-ST942:56:C4CFMACXX:7:1203:12641:654362	100.00	63	0	0	29	91	120839	120777	5e-29	117
HWI-ST942:56:C4CFMACXX:7:1203:15323:283762	97.87	94	1	1	1	94	102794	102702	2e-42	161
HWI-ST942:56:C4CFMACXX:7:1203:15323:283762	100.00	24	0	0	77	100	4430	4407	2e-07	45.4
HWI-ST942:56:C4CFMACXX:7:1203:19284:401062	100.00	45	0	0	1	45	109491	109447	5e-19	84.2
HWI-ST942:56:C4CFMACXX:7:1203:19284:401062	100.00	60	0	0	40	99	109649	109590	2e-27	111
HWI-ST942:56:C4CFMACXX:7:1203:19738:60612	100.00	59	0	0	1	59	124045	124103	8e-27	110
HWI-ST942:56:C4CFMACXX:7:1203:19738:60612	100.00	51	0	0	49	99	123914	123964	2e-22	95.3
HWI-ST942:56:C4CFMACXX:7:1203:3560:867322	100.00	46	0	0	1	46	75193	75148	1e-19	86.1
HWI-ST942:56:C4CFMACXX:7:1203:3560:867322	100.00	54	0	0	47	100	75147	75200	5e-24	100
HWI-ST942:56:C4CFMACXX:7:1203:3914:606392	94.59	37	1	1	1	36	25394	25358	1e-10	56.5
HWI-ST942:56:C4CFMACXX:7:1203:3914:606392	100.00	72	0	0	28	99	25337	25408	5e-34	134
HWI-ST942:56:C4CFMACXX:7:1203:5574:936712	100.00	38	0	0	1	38	122773	122810	4e-15	71.3
HWI-ST942:56:C4CFMACXX:7:1203:5574:936712	100.00	62	0	0	39	100	122810	122749	2e-28	115
HWI-ST942:56:C4CFMACXX:7:1203:6469:135922	100.00	69	0	0	1	69	86944	87012	2e-32	128
HWI-ST942:56:C4CFMACXX:7:1203:6469:135922	100.00	37	0	0	64	100	101647	101683	1e-14	69.4
HWI-ST942:56:C4CFMACXX:7:1204:10876:96562	100.00	56	0	0	1	56	115222	115167	4e-25	104
HWI-ST942:56:C4CFMACXX:7:1204:10876:96562	100.00	51	0	0	50	100	96282	96232	2e-22	95.3
HWI-ST942:56:C4CFMACXX:7:1204:1128:319602	98.18	55	1	0	1	55	63653	63599	6e-23	97.1
HWI-ST942:56:C4CFMACXX:7:1204:1128:319602	100.00	49	0	0	48	96	63848	63800	3e-21	91.6
HWI-ST942:56:C4CFMACXX:7:1204:11999:719812	98.55	69	1	0	1	69	29539	29471	1e-30	122
HWI-ST942:56:C4CFMACXX:7:1204:11999:719812	97.56	41	1	0	60	100	99146	99186	4e-15	71.3
HWI-ST942:56:C4CFMACXX:7:1204:12126:813271	100.00	39	0	0	1	39	101276	101238	1e-15	73.1
HWI-ST942:56:C4CFMACXX:7:1204:12126:813271	98.53	68	1	0	33	100	37243	37310	4e-30	121
HWI-ST942:56:C4CFMACXX:7:1204:13450:899722	93.24	74	5	0	1	74	13804	13731	8e-27	110
HWI-ST942:56:C4CFMACXX:7:1204:13450:899722	90.63	32	3	0	69	100	13707	13738	8e-07	43.6
HWI-ST942:56:C4CFMACXX:7:1204:16495:655802	100.00	82	0	0	1	82	4458	4539	1e-39	152
HWI-ST942:56:C4CFMACXX:7:1204:16495:655802	90.63	32	2	1	69	100	6485	6515	3e-06	41.7
HWI-ST942:56:C4CFMACXX:7:1204:18529:218232	98.55	69	1	0	1	69	50435	50503	1e-30	122
HWI-ST942:56:C4CFMACXX:7:1204:18529:218232	100.00	44	0	0	56	99	91944	91901	2e-18	82.4
HWI-ST942:56:C4CFMACXX:7:1204:2124:242532	100.00	24	0	0	1	24	90210	90233	2e-07	45.4
HWI-ST942:56:C4CFMACXX:7:1204:2124:242532	100.00	78	0	0	23	100	90313	90236	2e-37	145
HWI-ST942:56:C4CFMACXX:7:1204:7688:898502	98.39	62	1	0	1	62	13281	13342	8e-27	110
HWI-ST942:56:C4CFMACXX:7:1204:7688:898502	98.15	54	0	1	47	100	98783	98731	8e-22	93.5
HWI-ST942:56:C4CFMACXX:7:1204:8103:501691	100.00	69	0	0	1	69	32344	32412	2e-32	128
HWI-ST942:56:C4CFMACXX:7:1204:8103:501691	100.00	45	0	0	56	100	90467	90511	5e-19	84.2
HWI-ST942:56:C4CFMACXX:7:1204:8103:501692	100.00	65	0	0	1	65	90531	90467	4e-30	121
HWI-ST942:56:C4CFMACXX:7:1204:8103:501692	100.00	49	0	0	52	100	32412	32364	3e-21	91.6
HWI-ST942:56:C4CFMACXX:7:1204:8926:388741	100.00	68	0	0	1	68	77383	77450	7e-32	126
HWI-ST942:56:C4CFMACXX:7:1204:8926:388741	100.00	30	0	0	67	96	59403	59374	1e-10	56.5
HWI-ST942:56:C4CFMACXX:7:1204:9525:495691	100.00	37	0	0	1	37	90093	90057	1e-14	69.4
HWI-ST942:56:C4CFMACXX:7:1204:9525:495691	100.00	63	0	0	38	100	85958	85896	5e-29	117
HWI-ST942:56:C4CFMACXX:7:1205:12584:361442	100.00	66	0	0	1	66	86728	86793	1e-30	122
HWI-ST942:56:C4CFMACXX:7:1205:12584:361442	100.00	35	0	0	66	100	64368	64402	2e-13	65.8
HWI-ST942:56:C4CFMACXX:7:1205:13418:80902	100.00	56	0	0	1	56	16958	16903	4e-25	104
HWI-ST942:56:C4CFMACXX:7:1205:13418:80902	98.15	54	1	0	46	99	16882	16935	2e-22	95.3
[truncated: 4,374 more rows]

## Sheet: reca1
Read Identifiant	Match %	Aligned bases	Mismatches	Gap Openings	Start Pos. Read	Stop Pos. Read	Start Pos. Genome	Stop Pos. Genome	Expect Value	Bit Score
[truncated: 5,238 more rows]

[truncated: 17 more sheets: why1why3, why1why3polIb, why1why3reca1, reca1polIb, Col-0 mitochondria, Brain 1, Brain 2, Brain 3, Brain 4, Liver 1, Liver 2, Liver 3, Liver 4, E. coli 1, E. coli 2, E. coli 3, E.coli 4]
