# Supplementary material for: Organelle DNA rearrangement mapping reveals U-turn-like inversions as a major source of genomic instability in Arabidopsis and humans
Source: HighWire-hosted journal article supplement (doi:10.1101/gr.188573.114), 2015-03-23
Supplement: SuppTableS4.xlsx [file SuppTableS4.xlsx]

## Sheet: Supp. Table S4
Rearrangement junctions per position per 100 mitochondrion genomes in A. thaliana Col-0
Organism		Genome Positions	0-9999	10000-19999	20000-29999	30000-39999	40000-49999	50000-59999	60000-69999	70000-79999	80000-89999	90000-99999	100000-109999	110000-119999	120000-129999	130000-139999	140000-149999	150000-159999	160000-169999	170000-179999	180000-189999	190000-199999	200000-209999	210000-219999	220000-229999	230000-239999	240000-249999	250000-259999	260000-269999	270000-279999	280000-289999	290000-299999	300000-309999	310000-319999	320000-329999	330000-339999	340000-349999	350000-359999	360000-369999
A.thaliana		360000-369999	0	0.998446	0	0	0	0	0	0	0	0	0	0	0	0	0	0	0	0	0	0	0	0	0	0	0	0	0	0	0	0.998446	0	0	0.998446	0	1.99689	0	3.99378
Genome		350000-359999	0	0	0	0	0	0	0	0	0	0	0	0	0	0	0	0	0	0	0	0	0	0	0	0	0	0	0	0	0	0	0	0	0	0	0	10.9829
Mitochondrion		340000-349999	0	0	0.998446	0	0	0	0	0	0	0	0	0	0	0	0	0	0	0	0	0	0	0	0	0	0	0.998446	0	0	0	0	0	0	0	0	2.99534
Line		330000-339999	0.998446	0	0	0	0	0	0	2.99534	0	0	0	0	0	0	0	0	0	0	0	0	0	0	0	0	0	0	0	0	0	0	0	0	0	9.98446
Col-0		320000-329999	0	0	0	0	0	0	0	0	0	0	0	0	0.998446	0	0	0	0	0	0	0	0	0	0.998446	0	0	0	0	0.998446	0	0	0	0	6.98912
Mutations		310000-319999	0	0	0	0	0	0	0	0	0	0	0	0	0	0	0	0	0.998446	0	0	0	0	0	0	0	0	0.998446	0	0	0	0	0	42.9332
WT		300000-309999	0	0	0	0	0	0.998446	0	0	0	0	0	0	0	0	0	0	0	0	0	0	0	0	0	0	0	0	0	0	0	0	5.99068
Total Reads		290000-299999	0	0	0	0	0	0	0	0	0	0	0	0	0	0	0	0	0	0	0.998446	0	0	0	0	0	0	0	0	0	0	0.998446
367495		280000-289999	0	0	0	0	0	0	0	0	0	0.998446	0	0	0	0	0	0.998446	0	0	0	0	0	0	0	0	0	0	0	0	0.998446
Total Bases		270000-279999	0	0	0	0	0	0	0	0	0	0	0	0	0	0	0	0	0	0	0	0	0	0	0	0	0	0	0	2.99534
36749500		260000-269999	0	1.99689	0	0	0	0	0	0	0	0.998446	0	0	0	0	0	0	0	0	0	0	0	0	0	0	0	0	2.99534
Genome Size		250000-259999	0	0	0	0	0	0	0	0	0	0	0	0	0	0	0	0	0	0	0	0	0	0	0	0	0	5.99068
366924		240000-249999	0	0	0	0	0	0	0.998446	0	0	0	0	0	0	0	0	0	0	0	0	0	0	0	0	0.998446	2.99534
Multiplier		230000-239999	0	0	0	0	0	0	0	0	0	0	0	0	0	0	0	0	0	0	0	0	0	0	0	3.99378
0.998446		220000-229999	0.998446	0	0	0	0	0	0	0	0	0	0	0	0	0	0	0	0	0	0	0	0	0	2.99534
		210000-219999	0	0	0	0	0	0	0	0	0	0	0	0	0	0.998446	0	0	0	0	0	0	0	4.99223
Color Scale		200000-209999	0	0	0	0	0	0	0	0	0	0	0	0	0.998446	0	0	0	0	0	0	0	5.99068
0		190000-199999	0	0	0	0	0	0	0	0	0	0	0	0	0	0	0	0	0	0	0	4.99223
1		180000-189999	0	0	0	0	0	0	0	0	0	0	0	0	0	0	0	0	0	0	4.99223
2		170000-179999	0	0	0	0	0	0	0	0	0	0	0	0	0	0	0	0	0	2.99534
3		160000-169999	0	0	0	0	0	0	0	0	0.998446	0	0	0	0	0	0	0	0.998446
4		150000-159999	0	0	0	0	0	0.998446	0	0	0	0	0	0	0	0	0	8.98602
5		140000-149999	0	0	0	0	0	0	0	0	0	0	0	0	0	0	4.99223
6		130000-139999	0	0	0	0	0	0	0	0	0	0	0	0	0	2.99534
7		120000-129999	0	0	0	0	0	0	0	0	0	0	0	0	1.99689
8		110000-119999	0	0	0	0	0	0	0	0	0	0	0	0
9		100000-109999	0	0	0.998446	0	0	0	0	0	0	0	7.98757
10		90000-99999	0	0	0	0.998446	0	0.998446	0	0	0	5.99068
11		80000-89999	0	0	0	0	0	0	0	0	3.99378
12		70000-79999	0	0	0	0	1.99689	0	0.998446	2.99534
13		60000-69999	0	0	0	0.998446	0	0	2.99534
14		50000-59999	0	0	0	0	0	3.99378
15		40000-49999	1.99689	0	0	0.998446	2.99534
		30000-39999	0	0	0	2.99534
		20000-29999	0	0	5.99068
		10000-19999	0	2.99534
		0-9999	0
