# Supplementary material for: Organelle DNA rearrangement mapping reveals U-turn-like inversions as a major source of genomic instability in Arabidopsis and humans
Source: HighWire-hosted journal article supplement (doi:10.1101/gr.188573.114), 2015-03-23
Supplement: SuppTablesS1-3.xlsx [file SuppTablesS1-3.xlsx]

## Sheet: Supp. Table S1
Rearrangement junctions per position per 10000 plastid genomes in A. thaliana Col-0
Organism		Genome Positions	0-999	1000-1999	2000-2999	3000-3999	4000-4999	5000-5999	6000-6999	7000-7999	8000-8999	9000-9999	10000-10999	11000-11999	12000-12999	13000-13999	14000-14999	15000-15999	16000-16999	17000-17999	18000-18999	19000-19999	20000-20999	21000-21999	22000-22999	23000-23999	24000-24999	25000-25999	26000-26999	27000-27999	28000-28999	29000-29999	30000-30999	31000-31999	32000-32999	33000-33999	34000-34999	35000-35999	36000-36999	37000-37999	38000-38999	39000-39999	40000-40999	41000-41999	42000-42999	43000-43999	44000-44999	45000-45999	46000-46999
A.thaliana		128000-128214	0	0	0	0	0	0	0	0	0	0	0	0	0	0	0	0	0	0	0	0	0	0	0	0	0	0	0	0	0	0	0	0	0	0	0	0	0	0	0	0	0	0	0	0	0	0	0
Genome		127000-127999	1.50154	0	0	0	0	0	0	0	0	0	0	1.50154	0	0	0	0	0	0	0	0	0	0	0	0	0	0	0	1.50154	0	0	0	0	0	0	0	0	0	1.50154	1.50154	0	0	1.50154	0	0	0	0	0
Plastid		126000-126999	0	0	0	0	0	0	0	0	0	0	0	0	0	0	0	0	0	0	0	0	0	0	0	0	0	0	0	0	1.50154	1.50154	0	1.50154	0	0	0	0	0	0	0	0	0	0	0	0	0	0	0
Line		125000-125999	0	0	0	0	0	3.00309	0	0	0	0	0	0	0	0	0	0	0	0	0	0	0	0	0	0	0	0	0	0	0	0	0	1.50154	3.00309	0	0	0	0	0	1.50154	0	0	0	0	0	0	0	0
Col-0		124000-124999	0	0	0	0	0	0	0	0	0	0	0	0	0	1.50154	0	0	0	0	0	0	0	0	0	0	0	0	0	0	0	0	0	0	0	0	0	0	1.50154	0	0	0	0	0	0	0	0	0	0
Mutations		123000-123999	0	0	1.50154	0	0	0	0	0	1.50154	0	0	0	0	0	1.50154	0	0	0	0	0	0	0	0	0	0	0	0	0	0	0	0	3.00309	0	0	0	0	0	1.50154	0	1.50154	0	0	0	0	0	0	0
WT		122000-122999	0	0	0	0	0	0	0	0	0	0	0	0	0	0	0	0	0	0	0	0	0	0	0	0	0	0	0	0	0	0	0	0	0	0	0	0	0	0	0	1.50154	0	0	0	0	0	0	0
Total Reads		121000-121999	0	0	0	0	0	0	0	0	0	0	0	0	0	0	0	0	0	0	0	0	0	0	0	0	0	3.00309	0	0	0	0	1.50154	0	0	0	0	0	0	0	0	0	0	0	0	1.50154	0	0	0
10287952		120000-120999	0	0	0	0	0	0	0	0	0	0	0	0	0	0	0	0	0	0	0	0	0	0	0	0	0	0	0	0	0	0	0	1.50154	1.50154	0	0	0	0	0	0	0	1.50154	1.50154	0	0	0	1.50154	0
Total Bases		119000-119999	0	1.50154	0	1.50154	0	0	0	0	0	0	0	0	0	0	0	0	1.50154	0	0	0	0	0	0	0	0	0	0	0	0	0	0	0	0	0	0	0	0	0	0	0	0	1.50154	0	1.50154	0	0	0
1028795200		118000-118999	0	0	0	0	0	0	0	0	0	0	0	0	0	0	0	0	0	0	0	0	0	0	0	0	0	0	0	0	0	0	0	0	0	0	0	0	0	0	0	0	0	0	0	0	0	0	0
Genome Size		117000-117999	0	0	0	0	0	0	0	0	0	0	0	0	0	0	0	0	0	0	0	0	1.50154	0	0	0	0	0	0	1.50154	0	0	0	0	0	1.50154	0	0	0	0	0	0	0	0	0	0	0	0	0
154478		116000-116999	0	0	0	0	0	0	0	0	0	0	0	0	0	0	0	0	0	0	0	1.50154	0	0	0	0	0	0	0	0	0	1.50154	0	0	0	0	0	0	0	0	0	1.50154	0	0	0	0	0	0	0
Multiplier		115000-115999	0	0	0	0	0	0	0	0	0	0	0	0	0	0	0	0	0	0	0	0	0	1.50154	1.50154	1.50154	0	0	0	0	0	0	1.50154	0	0	0	0	0	0	0	1.50154	0	0	0	0	0	0	0	0
1.50154		114000-114999	0	0	3.00309	0	0	1.50154	0	0	0	0	0	0	0	0	0	0	0	0	0	0	0	0	0	0	0	0	0	0	0	0	0	0	0	0	0	0	0	0	0	0	0	0	0	0	0	0	0
		113000-113999	0	0	0	0	0	1.50154	0	0	0	0	0	0	0	0	0	3.00309	0	0	0	0	0	0	0	0	0	0	0	0	0	0	0	1.50154	0	0	0	0	1.50154	0	0	0	0	0	1.50154	0	0	1.50154	0
Color Scale		112000-112999	0	1.50154	0	0	0	0	0	0	0	0	0	1.50154	0	0	0	0	0	0	0	0	0	0	0	0	0	0	0	0	1.50154	0	0	0	0	0	0	0	0	0	0	0	0	0	0	0	1.50154	0	0
0		111000-111999	0	0	0	1.50154	0	0	0	1.50154	0	0	0	0	0	0	0	0	0	0	0	0	0	3.00309	0	6.00617	0	0	0	0	0	0	0	0	1.50154	0	1.50154	0	0	0	0	0	0	0	0	0	0	0	0
1		110000-110999	0	0	0	0	0	0	0	1.50154	0	0	0	0	0	0	0	0	0	0	0	0	0	0	0	0	0	0	0	0	0	0	0	0	0	0	0	0	0	0	0	0	0	0	0	0	0	0	0
2		109000-109999	0	0	0	0	0	0	0	0	0	0	0	0	0	0	0	0	0	0	0	0	0	0	0	0	0	0	1.50154	0	1.50154	0	0	0	0	0	0	0	0	1.50154	0	0	0	0	0	0	0	0	0
3		108000-108999	0	0	0	0	0	0	0	0	0	0	0	0	0	0	0	0	0	0	0	0	0	1.50154	0	0	0	0	0	0	0	0	0	3.00309	0	0	0	0	0	0	0	0	0	0	0	0	0	0	0
4		107000-107999	1.50154	0	0	0	0	0	0	0	0	0	0	0	0	0	0	1.50154	0	0	0	0	0	1.50154	0	0	0	0	0	0	0	0	0	0	0	0	0	0	0	0	0	0	0	0	3.00309	0	0	0	0
5		106000-106999	0	3.00309	0	0	1.50154	0	0	0	0	0	0	0	0	0	1.50154	1.50154	0	0	3.00309	0	0	0	0	0	0	0	0	0	0	0	0	0	0	0	3.00309	0	0	0	1.50154	0	1.50154	0	0	0	0	0	0
6		105000-105999	0	0	0	0	0	0	0	0	0	0	0	0	0	0	0	0	0	1.50154	0	0	0	0	0	0	0	0	1.50154	0	0	0	0	0	0	0	0	0	0	0	0	0	0	1.50154	0	0	0	0	0
7		104000-104999	0	0	0	0	0	0	0	0	0	0	0	0	0	0	0	0	0	0	0	0	0	0	0	0	0	0	0	0	0	0	0	0	1.50154	0	1.50154	0	0	0	0	0	0	0	0	0	0	0	0
8		103000-103999	0	0	0	1.50154	0	0	0	0	0	0	0	0	0	0	0	0	0	0	0	0	0	0	0	0	1.50154	0	0	0	0	0	0	0	0	0	0	0	1.50154	0	0	0	0	1.50154	0	0	0	0	0
9		102000-102999	1.50154	0	0	0	0	0	0	0	6.00617	0	0	0	0	0	0	0	0	0	1.50154	0	0	0	0	0	0	0	0	0	1.50154	0	0	0	0	0	0	1.50154	0	0	0	0	0	0	0	0	0	0	0
10		101000-101999	0	0	0	0	0	0	0	0	0	0	0	0	0	0	0	0	0	0	0	0	0	0	0	0	0	0	0	0	0	0	0	0	0	0	0	0	0	0	0	0	0	0	0	0	0	0	0
11		100000-100999	0	0	0	0	0	0	0	0	0	0	0	0	1.50154	0	0	0	0	0	0	0	0	0	0	0	0	0	0	0	1.50154	0	0	0	0	0	0	0	0	0	0	0	0	0	0	0	0	0	1.50154
12		99000-99999	0	0	0	0	0	0	0	1.50154	0	0	0	0	0	0	0	0	0	0	0	0	0	0	0	0	0	1.50154	0	0	1.50154	0	1.50154	0	0	0	0	0	1.50154	0	0	1.50154	0	0	0	0	0	0	1.50154
13		98000-98999	0	1.50154	0	0	0	0	0	0	0	0	0	0	0	0	0	0	0	0	0	0	0	0	0	1.50154	0	0	0	0	1.50154	0	0	0	0	0	1.50154	0	0	0	0	1.50154	0	0	0	0	0	0	0
14		97000-97999	0	0	0	0	0	0	1.50154	0	0	0	0	1.50154	0	0	1.50154	0	0	0	0	0	0	0	1.50154	0	0	1.50154	0	0	1.50154	0	0	0	0	0	0	0	0	0	0	0	0	0	0	0	0	1.50154	0
15		96000-96999	0	0	0	0	0	0	1.50154	0	0	1.50154	0	0	0	3.00309	0	0	0	0	0	0	0	0	0	0	0	0	0	0	0	0	0	0	0	0	0	0	0	0	0	0	0	0	1.50154	0	0	0	0
		95000-95999	0	0	0	0	1.50154	0	0	0	0	0	0	0	0	0	0	0	0	0	1.50154	0	0	0	0	0	1.50154	0	0	0	0	0	0	0	0	0	0	0	0	0	0	0	0	0	0	0	0	0	0
		94000-94999	0	0	0	0	0	0	0	0	0	0	0	0	0	0	0	0	0	0	0	0	0	0	0	0	0	0	0	0	0	0	0	0	0	0	0	0	0	0	0	0	0	0	0	0	0	0	0
		93000-93999	0	0	1.50154	0	0	0	0	0	0	0	0	0	0	0	0	1.50154	0	0	0	0	0	0	0	0	0	0	0	0	0	0	1.50154	0	0	0	0	0	0	0	0	0	0	0	1.50154	0	0	4.50463	0
		92000-92999	0	0	0	0	0	0	0	0	0	0	0	0	0	1.50154	0	0	0	0	0	0	1.50154	0	0	0	0	0	0	0	0	0	0	0	0	0	0	0	0	0	0	0	0	0	0	0	0	0	0
		91000-91999	0	0	0	0	0	0	0	0	0	0	1.50154	1.50154	4.50463	0	0	1.50154	0	0	0	0	0	0	0	0	0	0	0	0	0	0	0	0	0	0	0	0	0	0	1.50154	0	0	0	0	0	0	0	0
		90000-90999	0	0	0	0	0	0	0	0	0	0	0	0	1.50154	1.50154	0	0	0	0	0	0	1.50154	0	0	0	0	0	0	0	0	0	0	0	0	0	0	0	0	0	1.50154	0	0	1.50154	0	0	0	0	0
		89000-89999	1.50154	0	0	0	0	0	0	0	1.50154	1.50154	0	6.00617	0	0	0	0	1.50154	0	0	0	0	0	0	0	0	0	1.50154	0	0	0	0	0	0	0	0	0	0	1.50154	0	0	0	0	0	0	0	0	0
		88000-88999	1.50154	0	0	0	0	0	0	0	0	0	0	0	0	0	0	0	0	0	0	0	0	0	0	0	0	0	0	0	0	0	0	0	0	0	0	0	0	0	0	0	0	0	1.50154	0	1.50154	0	0
		87000-87999	0	3.00309	0	0	0	0	0	0	0	0	0	0	0	0	0	0	0	0	0	0	0	0	0	0	0	1.50154	0	0	0	0	0	0	0	1.50154	0	0	0	0	0	0	0	0	1.50154	0	0	0	0
		86000-86999	0	0	0	0	1.50154	0	0	0	0	0	0	0	0	0	0	0	1.50154	0	0	0	0	0	0	0	0	0	0	0	1.50154	0	0	0	0	0	0	0	0	0	0	0	0	0	0	0	0	1.50154	1.50154
		85000-85999	0	0	0	0	0	0	0	0	0	0	0	0	1.50154	0	0	0	0	0	1.50154	0	0	1.50154	0	0	0	0	0	1.50154	0	0	0	0	0	0	0	1.50154	0	1.50154	0	0	0	0	0	0	0	1.50154	1.50154
		84000-84999	13.5139	0	0	0	0	0	0	0	0	0	0	0	0	0	0	1.50154	0	0	0	0	0	0	0	0	0	0	0	0	0	1.50154	1.50154	0	0	0	0	0	0	0	0	0	0	0	0	0	0	0	0
		83000-83999	0	0	0	0	0	0	0	0	0	0	0	0	0	0	0	0	0	0	0	0	0	1.50154	0	0	0	0	0	0	0	0	0	0	0	0	0	0	0	0	0	0	0	0	0	0	0	0	0
		82000-82999	0	0	0	0	0	0	1.50154	1.50154	0	0	0	0	0	0	0	1.50154	0	0	0	0	0	0	0	0	0	1.50154	0	0	0	0	0	0	0	0	0	0	0	0	0	0	0	0	0	0	0	0	1.50154
		81000-81999	0	0	0	0	1.50154	0	0	0	1.50154	0	0	0	0	0	0	0	0	0	0	0	0	0	0	0	0	0	0	0	0	0	0	0	0	0	0	0	0	0	0	0	0	0	0	0	0	0	0
		80000-80999	0	0	0	0	0	0	0	0	0	0	0	0	0	0	0	0	0	0	0	1.50154	0	0	0	0	0	0	0	0	0	0	0	0	0	0	0	0	0	0	0	0	0	0	0	0	1.50154	0	0
		79000-79999	0	0	0	0	0	0	0	0	0	0	0	0	0	1.50154	0	0	0	0	0	0	0	0	0	0	0	0	0	0	0	0	0	0	0	0	0	0	0	0	0	0	0	0	0	0	0	0	0
		78000-78999	0	0	0	0	0	0	0	0	0	1.50154	0	0	0	0	0	0	0	1.50154	0	0	0	0	0	0	0	0	0	0	1.50154	0	0	1.50154	0	0	0	0	0	0	0	0	0	0	0	0	0	0	0
		77000-77999	3.00309	0	0	0	0	1.50154	0	0	0	0	0	0	0	0	0	0	0	0	0	0	0	0	0	0	0	0	0	0	0	0	0	0	0	0	0	0	0	0	0	0	0	0	0	0	0	0	0
		76000-76999	0	0	0	0	0	0	0	0	0	0	0	0	1.50154	0	0	0	1.50154	0	0	0	1.50154	0	0	0	0	0	0	0	0	0	0	0	0	0	0	0	0	0	0	1.50154	1.50154	1.50154	0	0	0	0	1.50154
		75000-75999	0	0	0	1.50154	3.00309	0	0	0	0	0	0	1.50154	0	0	1.50154	0	0	0	0	0	0	0	0	0	0	0	0	0	0	0	0	0	1.50154	0	0	0	0	0	0	0	0	0	0	0	0	0	0
		74000-74999	0	0	0	0	0	0	0	1.50154	0	0	0	0	0	0	0	0	0	0	0	0	0	0	0	0	0	0	0	0	0	0	0	0	0	0	0	0	0	0	0	0	0	0	0	0	0	0	1.50154
		73000-73999	0	0	0	1.50154	0	0	0	0	0	0	0	0	0	0	0	0	0	0	0	0	0	0	0	0	0	0	0	0	0	0	0	0	0	0	0	0	0	0	0	0	0	0	0	0	0	0	0
		72000-72999	0	0	0	0	0	0	0	0	0	0	0	0	0	0	0	0	1.50154	0	0	0	0	0	1.50154	0	0	0	0	0	0	0	1.50154	0	1.50154	0	0	0	0	1.50154	0	0	0	1.50154	0	0	0	0	0
		71000-71999	0	0	0	0	0	0	0	0	0	0	0	0	0	0	1.50154	0	0	0	0	0	0	0	0	0	0	0	0	0	0	0	0	1.50154	0	0	0	0	0	0	0	0	0	0	0	0	0	0	0
		70000-70999	0	0	0	0	3.00309	0	0	0	0	0	0	0	0	0	0	0	0	0	0	0	0	0	0	0	0	1.50154	0	0	0	0	0	0	0	0	0	0	0	0	1.50154	0	0	0	0	0	0	0	0
		69000-69999	0	0	0	0	0	0	0	0	0	0	0	0	0	0	0	0	0	0	0	0	0	0	0	0	0	0	0	1.50154	0	0	0	0	0	0	0	0	0	0	0	0	0	0	0	0	0	0	0
		68000-68999	0	0	0	0	0	0	0	0	0	1.50154	0	0	1.50154	0	0	0	0	0	0	0	0	0	0	0	0	0	0	0	0	0	0	0	0	0	0	0	0	0	0	0	0	0	0	0	0	0	0
		67000-67999	0	0	0	0	0	0	0	0	0	0	0	0	0	0	0	0	0	0	0	0	0	0	0	1.50154	0	0	0	0	0	0	0	0	0	0	0	0	0	0	0	0	0	0	0	0	0	0	0
		66000-66999	0	0	0	0	0	0	0	0	0	1.50154	0	0	0	0	0	0	0	0	0	0	1.50154	0	0	0	0	0	0	0	1.50154	0	1.50154	1.50154	0	0	0	0	1.50154	0	0	0	0	0	0	0	0	0	0
		65000-65999	0	0	0	1.50154	0	0	0	0	0	0	0	0	0	0	1.50154	0	0	0	1.50154	1.50154	0	1.50154	0	0	0	0	0	0	0	1.50154	0	0	0	0	0	0	0	0	0	0	0	0	0	0	0	0	0
		64000-64999	0	0	0	0	0	0	0	0	0	0	0	0	0	0	0	0	0	0	0	1.50154	0	0	0	0	0	1.50154	0	0	0	0	0	0	0	0	0	0	0	0	0	0	0	0	0	0	0	0	0
		63000-63999	0	0	0	0	0	0	0	0	0	0	1.50154	1.50154	0	0	0	0	1.50154	0	0	0	0	0	0	3.00309	0	0	0	0	1.50154	0	0	0	1.50154	0	0	0	0	0	0	0	0	0	0	0	0	0	0
		62000-62999	0	0	0	0	0	0	0	0	0	0	0	1.50154	0	0	1.50154	0	0	0	0	0	0	0	0	0	0	0	1.50154	0	0	0	1.50154	0	0	0	0	0	0	0	0	0	0	0	0	0	0	0	0
		61000-61999	0	0	0	0	0	0	0	0	0	0	0	0	0	0	0	0	0	1.50154	0	0	0	0	0	0	0	0	0	0	0	0	0	0	0	0	0	0	0	0	0	0	0	0	0	0	0	0	0
		60000-60999	0	0	0	0	0	0	0	0	0	0	0	0	0	0	1.50154	0	0	0	0	0	0	0	0	0	0	0	0	0	0	0	3.00309	0	0	0	0	0	0	0	0	0	0	0	0	0	0	0	0
		59000-59999	0	0	0	0	0	0	0	0	0	0	0	0	0	0	0	0	0	0	0	0	3.00309	0	0	0	0	0	0	0	0	0	0	0	0	0	0	0	0	0	0	0	0	0	0	0	0	0	0
		58000-58999	0	0	0	0	0	0	0	0	0	0	0	1.50154	0	1.50154	0	0	0	0	0	0	0	0	0	0	0	0	0	0	0	0	0	0	0	0	1.50154	0	0	0	0	0	0	0	0	0	0	0	0
		57000-57999	0	0	0	0	0	0	0	0	0	0	0	0	3.00309	0	0	0	0	0	1.50154	0	0	0	0	0	0	0	0	0	0	0	3.00309	0	0	0	0	0	0	0	0	0	0	0	0	0	0	0	0
		56000-56999	0	0	0	1.50154	0	0	0	0	0	0	0	0	0	0	0	0	0	0	1.50154	0	0	0	0	0	0	0	0	0	0	0	0	0	0	1.50154	1.50154	0	0	0	0	0	0	0	0	0	0	0	0
		55000-55999	0	0	0	0	1.50154	1.50154	0	0	0	0	0	0	0	0	0	0	0	0	0	0	0	0	1.50154	0	0	0	0	0	0	0	0	0	0	1.50154	0	0	0	0	0	0	0	0	0	0	0	0	0
		54000-54999	0	0	0	0	0	0	0	0	0	0	0	0	0	3.00309	0	0	0	0	0	0	0	0	0	0	0	0	0	1.50154	0	0	1.50154	0	1.50154	0	0	0	0	0	1.50154	1.50154	0	0	0	0	0	0	0
		53000-53999	0	0	0	0	0	0	0	0	0	0	0	0	0	0	0	0	0	0	0	0	0	0	0	0	0	0	0	0	0	0	0	0	0	0	0	0	0	0	0	0	0	0	0	0	0	0	0
		52000-52999	0	1.50154	0	0	0	0	0	0	0	0	0	0	0	0	0	0	0	0	0	0	0	0	0	0	0	0	0	0	0	0	0	0	0	0	0	0	0	0	0	0	0	0	0	0	0	0	0
		51000-51999	0	0	0	1.50154	0	0	0	1.50154	0	0	0	0	0	0	0	0	0	0	0	0	0	0	0	0	0	0	0	0	0	0	0	0	0	0	0	0	0	0	0	0	0	0	0	0	0	1.50154	0
		50000-50999	0	0	1.50154	0	0	0	0	0	0	0	0	0	0	0	0	0	0	0	0	0	0	0	0	0	0	0	0	0	0	0	0	0	0	0	0	0	0	0	1.50154	0	0	0	0	0	0	0	0
		49000-49999	1.50154	0	0	0	0	0	0	0	0	1.50154	0	0	0	0	0	0	0	0	0	0	0	0	0	0	0	0	0	0	0	0	0	0	0	0	0	0	0	1.50154	0	0	0	1.50154	0	0	1.50154	0	0
		48000-48999	0	0	0	0	0	1.50154	0	0	0	0	0	0	0	1.50154	0	0	0	0	0	0	0	0	0	0	0	0	0	0	0	0	0	0	0	0	0	0	0	0	0	0	1.50154	0	0	0	0	0	0
		47000-47999	0	0	0	0	0	0	0	0	0	0	0	0	0	0	0	0	0	0	0	0	0	0	0	0	0	0	0	0	0	0	0	0	0	0	0	1.50154	0	0	0	0	0	0	0	0	0	0	0
		46000-46999	0	0	0	0	0	0	0	0	0	0	0	0	0	0	1.50154	1.50154	0	0	0	0	0	0	0	0	0	0	0	0	0	0	0	0	0	0	0	0	0	0	0	1.50154	0	0	0	0	0	0	4.50463
		45000-45999	0	0	0	0	0	0	0	0	0	0	0	0	0	0	1.50154	0	0	0	0	0	0	0	0	0	0	0	0	0	0	0	0	0	0	0	0	0	0	0	0	0	0	0	0	0	0	0
		44000-44999	0	0	0	0	0	0	0	0	0	0	0	0	0	0	0	0	0	0	0	0	0	0	0	0	0	0	0	0	0	0	1.50154	0	0	0	0	1.50154	0	0	0	0	0	0	0	0	1.50154
		43000-43999	0	0	0	0	0	0	0	0	0	0	0	0	0	0	0	0	0	0	0	0	0	0	0	0	0	0	0	0	0	0	0	0	0	0	0	0	0	0	0	0	0	0	0	1.50154
		42000-42999	0	0	0	0	0	0	0	0	0	0	0	0	0	0	0	0	1.50154	0	0	0	0	0	0	0	0	0	0	0	0	0	0	0	0	0	0	0	0	0	0	0	0	0	1.50154
		41000-41999	0	0	0	0	0	0	1.50154	0	0	0	0	0	0	0	0	0	0	1.50154	0	0	0	0	0	0	1.50154	0	0	0	0	0	0	0	0	0	0	0	0	0	0	0	0	4.50463
		40000-40999	0	0	1.50154	0	1.50154	0	0	0	0	0	0	0	0	0	0	0	0	0	0	0	0	0	0	0	0	0	0	0	0	0	0	0	0	0	0	0	0	0	0	1.50154	4.50463
		39000-39999	0	0	0	0	0	0	0	0	0	0	0	0	0	0	0	0	0	0	0	0	0	0	0	0	0	0	0	1.50154	0	0	0	0	0	0	1.50154	0	0	3.00309	0	7.50771
		38000-38999	0	0	0	0	0	0	0	0	0	0	0	0	0	0	0	0	0	0	0	0	0	0	0	3.00309	0	0	0	0	0	0	0	0	0	0	0	0	0	0	9.00926
		37000-37999	0	0	0	0	0	0	0	0	0	0	0	0	0	0	0	0	0	0	0	0	0	0	0	0	0	1.50154	1.50154	0	0	0	0	0	1.50154	0	0	0	0	3.00309
		36000-36999	0	0	0	0	0	0	0	0	0	0	0	0	0	0	0	0	0	0	0	0	0	0	0	0	0	1.50154	0	0	1.50154	0	0	0	0	0	0	0	4.50463
		35000-35999	0	0	0	0	0	0	0	0	0	0	0	0	0	0	0	0	0	0	3.00309	0	0	0	0	0	0	0	0	0	0	0	0	0	0	0	0	7.50771
		34000-34999	0	0	0	0	0	0	0	0	0	0	0	0	0	0	0	0	0	0	0	0	0	0	0	0	0	0	0	0	0	0	0	0	0	0	1.50154
		33000-33999	0	0	0	0	0	0	0	0	0	0	0	0	0	0	0	0	0	0	0	0	0	0	0	0	0	0	0	0	1.50154	0	0	0	0	4.50463
		32000-32999	0	0	0	0	0	0	0	0	1.50154	0	0	0	0	0	0	0	0	0	0	0	0	0	0	0	0	0	0	0	0	0	0	0	1.50154
		31000-31999	1.50154	0	0	0	0	0	0	0	0	0	0	0	0	0	0	0	0	0	0	0	0	0	0	0	0	0	0	0	1.50154	0	0	3.00309
		30000-30999	0	0	0	0	0	0	0	0	0	0	0	0	0	0	0	0	0	0	1.50154	0	0	0	0	0	0	0	1.50154	0	1.50154	0	6.00617
		29000-29999	1.50154	0	0	0	0	0	0	0	0	0	0	0	0	0	0	0	0	0	0	0	0	1.50154	0	0	0	1.50154	0	0	0	6.00617
		28000-28999	0	0	0	0	0	0	0	0	0	0	0	0	0	0	1.50154	1.50154	0	1.50154	0	0	0	0	0	0	0	0	1.50154	0	6.00617
		27000-27999	0	0	0	0	0	0	0	0	0	0	0	0	0	0	1.50154	0	0	0	0	0	0	0	0	0	0	0	1.50154	9.00926
		26000-26999	0	0	0	0	0	1.50154	0	0	0	0	0	0	0	0	0	0	0	0	0	0	0	0	0	0	3.00309	1.50154	10.5108
		25000-25999	0	0	0	0	0	0	0	0	0	0	0	0	0	0	1.50154	0	0	0	3.00309	0	0	0	0	0	0	6.00617
		24000-24999	1.50154	0	0	0	0	0	0	0	0	0	0	0	0	0	0	0	0	0	0	0	3.00309	0	0	0	1.50154
		23000-23999	0	0	0	0	0	0	0	0	0	0	0	0	0	0	0	0	0	0	0	0	0	0	0	6.00617
		22000-22999	0	0	0	0	0	1.50154	0	1.50154	0	0	0	0	0	3.00309	0	0	0	0	0	0	1.50154	0	6.00617
		21000-21999	0	0	0	0	0	0	0	0	0	0	0	0	0	0	0	0	0	0	0	0	0	4.50463
		20000-20999	0	0	0	0	0	0	0	0	0	0	0	0	0	0	0	0	0	0	0	0	6.00617
		19000-19999	0	0	0	0	0	0	0	0	0	0	0	0	0	0	0	0	0	0	0	3.00309
		18000-18999	0	0	0	0	0	0	0	0	0	0	0	0	0	0	1.50154	0	0	0	3.00309
		17000-17999	0	0	0	0	0	0	0	0	0	0	0	0	0	0	0	0	1.50154	7.50771
		16000-16999	0	0	0	0	0	0	0	0	0	0	0	0	0	0	0	0	9.00926
		15000-15999	0	0	0	0	0	0	0	0	0	0	0	0	0	0	0	6.00617
		14000-14999	0	0	0	0	1.50154	0	0	0	0	0	0	0	3.00309	0	1.50154
		13000-13999	0	0	0	0	0	0	0	0	0	0	0	0	0	3.00309
		12000-12999	0	0	0	0	0	0	0	0	0	0	0	0	6.00617
		11000-11999	1.50154	0	0	0	0	0	0	0	0	0	1.50154	4.50463
		10000-10999	0	0	0	0	0	0	0	0	0	0	6.00617
		9000-9999	0	0	0	0	0	0	0	0	0	6.00617
		8000-8999	0	0	0	0	0	0	0	0	1.50154
		7000-7999	0	0	0	0	0	0	1.50154	6.00617
		6000-6999	0	0	0	0	0	3.00309	3.00309
		5000-5999	0	1.50154	0	0	0	4.50463
		4000-4999	0	1.50154	0	3.00309	4.50463
		3000-3999	3.00309	0	0	1.50154
		2000-2999	0	0	1.50154
		1000-1999	0	3.00309
		0-999	10.5108
[truncated: 82 more columns]

## Sheet: Supp. Table S2
Rearrangement junctions per position per 10000 plastid genomes in A. thaliana Ts-1
Organism		Genome Positions	0-999	1000-1999	2000-2999	3000-3999	4000-4999	5000-5999	6000-6999	7000-7999	8000-8999	9000-9999	10000-10999	11000-11999	12000-12999	13000-13999	14000-14999	15000-15999	16000-16999	17000-17999	18000-18999	19000-19999	20000-20999	21000-21999	22000-22999	23000-23999	24000-24999	25000-25999	26000-26999	27000-27999	28000-28999	29000-29999	30000-30999	31000-31999	32000-32999	33000-33999	34000-34999	35000-35999	36000-36999	37000-37999	38000-38999	39000-39999	40000-40999	41000-41999	42000-42999	43000-43999	44000-44999	45000-45999	46000-46999
A.thaliana		128000-128214	0	0	0	0	0	0	0	0	0	0	0	0	0	0	0	0	0	0	0	0	0	0	0	0	0	0	0	0	0	0	0	0	0	0	0	0	0	0	0	0	0	0	0	0	0	0	0
Genome		127000-127999	0	0	0	0	0	0	0	0	0	0	0	0	0	0	0	0	0	0	0	0	0	0	0	0	2.91692	0	0	0	0	0	0	0	0	0	0	0	0	0	0	0	5.83383	0	0	0	0	0	0
Plastid		126000-126999	0	0	0	0	0	0	0	0	0	0	0	5.83383	0	0	0	0	0	0	0	0	0	0	0	0	0	0	0	0	0	0	0	0	0	0	0	0	0	0	0	0	0	0	0	0	0	0	2.91692
Line		125000-125999	2.91692	0	0	0	0	0	0	0	0	0	0	0	0	0	0	0	0	0	0	0	0	0	0	0	5.83383	0	0	0	0	0	0	0	0	0	0	0	0	0	0	0	0	0	0	0	0	0	0
Ts-1		124000-124999	0	0	0	0	0	0	0	0	0	0	0	0	2.91692	0	0	0	0	0	0	0	0	0	0	0	0	0	2.91692	0	0	0	0	0	0	0	0	0	0	0	0	0	0	0	0	0	0	0	0
Mutations		123000-123999	0	0	0	0	0	0	0	0	0	0	0	0	0	0	0	0	0	0	0	0	0	0	0	0	0	0	0	0	0	0	0	0	0	0	0	0	0	0	0	0	0	0	0	0	0	0	0
WT		122000-122999	0	0	0	0	0	0	0	0	0	0	0	0	0	0	0	0	0	0	0	0	0	0	0	0	0	0	0	0	0	0	0	0	0	0	2.91692	0	0	0	0	0	0	0	0	0	0	0	0
Total Reads		121000-121999	0	0	0	0	0	0	0	0	0	0	0	0	0	0	0	0	0	0	0	0	0	0	0	0	0	0	0	0	0	0	0	0	0	0	0	0	0	0	0	0	0	0	0	0	0	0	0
5295936		120000-120999	0	0	0	0	0	0	0	0	0	0	0	0	0	0	0	0	0	0	0	0	0	0	0	0	0	0	0	0	0	0	0	0	0	0	0	0	0	0	0	0	0	0	0	0	0	0	0
Total Bases		119000-119999	0	0	0	0	0	0	0	0	0	0	0	0	0	0	0	0	0	0	0	0	0	0	0	0	0	0	0	0	0	0	0	0	0	0	0	0	0	0	0	0	0	0	0	0	0	0	0
529593600		118000-118999	0	0	0	0	0	0	0	0	0	0	0	0	0	0	0	0	0	0	0	0	0	0	0	0	0	0	0	0	0	0	0	0	0	0	0	0	0	0	0	0	0	0	0	0	0	2.91692	0
Genome Size		117000-117999	0	0	0	0	0	0	0	0	0	0	0	0	0	0	0	0	0	0	0	0	0	0	0	0	0	0	0	0	0	0	0	0	0	0	0	0	0	0	0	0	0	0	0	0	0	0	0
154478		116000-116999	0	0	0	0	0	0	0	0	0	0	0	0	0	0	0	0	0	0	0	0	0	0	0	0	0	0	0	0	0	0	0	0	0	0	0	0	0	0	0	0	0	0	0	0	0	0	0
Multiplier		115000-115999	0	0	0	0	0	0	0	0	0	0	0	0	0	0	0	0	0	0	0	0	0	0	0	0	0	0	0	0	0	0	0	0	0	0	0	0	0	0	0	0	0	0	0	0	0	0	0
2.91692		114000-114999	0	0	0	0	0	0	0	0	0	0	0	2.91692	0	0	0	0	0	0	0	0	0	0	2.91692	0	0	0	0	0	0	0	0	0	0	0	0	0	0	0	0	0	0	0	0	0	0	0	0
		113000-113999	0	0	0	0	0	0	0	0	0	0	0	0	0	0	0	0	0	0	0	0	0	0	0	0	0	0	0	0	0	0	0	0	0	0	0	0	0	0	0	0	0	0	0	0	0	0	0
Color Scale		112000-112999	0	0	0	0	0	0	0	0	0	0	0	0	0	0	0	0	0	0	0	0	0	0	0	0	0	0	0	0	0	0	0	0	0	0	0	0	0	0	0	2.91692	0	0	0	0	0	0	0
0		111000-111999	0	0	0	0	0	0	0	0	0	0	0	0	0	0	0	0	0	0	0	0	0	0	0	0	0	0	0	0	0	0	0	0	0	0	0	0	0	0	0	0	0	0	0	0	0	0	0
1		110000-110999	0	0	0	0	0	0	0	0	0	0	0	0	0	0	0	0	0	0	0	0	0	0	0	0	0	0	0	0	0	0	0	0	0	0	0	2.91692	0	0	0	0	0	0	0	0	0	0	0
2		109000-109999	0	0	0	0	0	0	0	0	0	0	0	0	0	0	0	2.91692	0	0	0	0	0	0	0	0	0	0	0	0	0	0	0	0	0	0	0	0	0	0	0	0	0	0	0	0	0	0	0
3		108000-108999	0	0	0	2.91692	0	0	0	0	0	0	0	0	0	0	2.91692	0	0	0	0	0	0	0	0	0	0	2.91692	0	0	0	0	0	0	0	0	0	0	0	0	0	0	0	2.91692	0	0	2.91692	0	0
4		107000-107999	0	0	0	0	2.91692	0	0	0	0	0	0	0	0	0	0	0	0	0	0	0	0	0	0	0	0	2.91692	0	0	0	0	0	0	0	0	0	0	0	0	0	0	0	2.91692	0	0	0	0	2.91692
5		106000-106999	0	0	0	0	0	0	0	0	0	0	2.91692	0	0	0	0	0	0	0	0	0	0	0	0	0	0	0	0	0	0	0	0	0	0	0	0	0	0	0	0	0	0	0	0	0	0	0	0
6		105000-105999	0	0	0	0	0	0	0	0	0	0	0	2.91692	0	0	2.91692	0	0	0	0	0	0	0	0	0	0	0	0	0	0	0	0	0	0	2.91692	0	0	0	0	0	0	2.91692	0	0	2.91692	0	0	0
7		104000-104999	0	0	0	0	0	0	0	0	0	0	0	0	0	0	0	0	0	0	0	0	0	0	0	0	0	0	0	2.91692	0	0	0	0	0	0	0	0	0	2.91692	0	0	0	0	0	0	0	0	0
8		103000-103999	0	0	0	0	0	0	2.91692	0	0	0	0	0	0	0	0	0	0	0	2.91692	0	2.91692	0	0	0	0	0	0	0	0	0	0	0	0	0	0	0	0	0	0	0	0	0	0	0	0	0	0
9		102000-102999	0	0	0	0	0	0	0	0	0	0	0	0	0	0	0	0	0	0	0	0	2.91692	0	0	0	0	0	0	0	0	0	0	0	0	0	5.83383	2.91692	0	0	0	0	0	0	0	0	0	0	0
10		101000-101999	0	2.91692	0	0	0	0	0	0	0	0	0	0	0	0	0	0	0	0	0	0	0	0	0	0	0	0	0	0	0	0	0	0	0	0	0	0	0	0	0	0	0	0	0	0	0	0	0
11		100000-100999	0	0	0	0	0	0	0	0	0	0	2.91692	0	0	0	2.91692	0	0	0	0	0	0	0	0	0	0	0	0	2.91692	0	0	2.91692	0	0	0	2.91692	0	0	0	0	0	0	0	0	0	0	0	0
12		99000-99999	0	0	0	0	0	0	0	0	0	0	0	0	0	0	0	0	0	0	0	0	0	0	0	0	0	0	0	0	0	2.91692	0	0	0	0	0	2.91692	0	0	0	0	0	0	0	0	0	0	0
13		98000-98999	0	2.91692	0	0	0	0	0	0	0	0	0	0	0	0	0	0	0	0	0	0	0	0	0	0	0	0	0	0	0	0	0	0	0	0	0	0	0	0	0	0	0	0	2.91692	0	0	0	0
14		97000-97999	0	0	0	0	0	0	0	0	0	0	0	0	0	0	0	2.91692	0	0	0	0	0	0	0	0	0	0	0	5.83383	0	0	0	0	0	0	2.91692	0	0	0	0	0	0	0	0	0	0	0	0
15		96000-96999	0	0	0	0	0	0	0	0	0	0	0	0	0	0	0	0	2.91692	0	2.91692	0	0	0	0	0	0	0	0	0	0	0	0	0	0	0	0	0	0	0	0	0	0	0	0	0	0	0	0
		95000-95999	0	0	0	0	0	0	0	0	0	0	0	0	0	0	0	0	0	0	0	0	0	0	2.91692	0	0	0	0	0	0	0	0	0	2.91692	0	0	0	0	0	0	0	0	0	0	0	0	0	0
		94000-94999	0	0	0	0	0	0	5.83383	0	0	0	0	0	0	0	0	0	0	0	0	0	0	0	0	0	0	0	0	0	0	0	0	0	0	0	0	0	0	0	0	0	0	0	2.91692	0	0	0	0
		93000-93999	0	0	0	0	0	0	0	0	0	0	0	0	0	2.91692	0	0	0	0	0	2.91692	0	0	0	0	0	0	0	0	0	0	0	0	0	0	0	0	0	0	0	0	0	0	5.83383	0	0	0	0
		92000-92999	0	2.91692	0	0	0	0	0	0	0	0	0	0	0	2.91692	0	0	0	0	0	0	0	0	0	0	0	0	2.91692	0	0	0	0	0	0	0	0	2.91692	0	0	0	0	0	0	0	2.91692	0	0	0
		91000-91999	0	0	2.91692	2.91692	0	0	0	0	0	0	2.91692	0	0	0	2.91692	0	0	0	0	0	0	0	0	0	0	0	0	0	0	0	0	0	0	0	0	0	0	0	0	0	0	0	0	0	0	0	0
		90000-90999	0	0	0	0	0	0	0	0	0	0	0	0	0	0	0	0	0	0	0	2.91692	0	0	0	0	0	0	0	0	0	0	0	0	0	0	2.91692	0	0	0	0	0	0	0	0	0	0	0	0
		89000-89999	0	0	0	0	0	0	0	0	0	0	0	0	0	0	0	0	0	0	0	0	0	0	0	0	0	0	0	0	0	0	0	0	2.91692	0	0	0	0	0	0	0	0	0	0	0	0	0	0
		88000-88999	0	0	0	0	0	0	0	0	0	0	0	0	0	0	0	0	0	0	0	0	0	0	0	0	0	0	0	0	0	0	0	0	0	0	0	2.91692	0	0	0	0	2.91692	0	0	0	0	0	0
		87000-87999	0	0	0	0	0	0	0	0	0	0	0	0	0	0	0	0	0	0	0	0	0	0	0	0	0	0	0	0	0	0	0	0	0	0	0	5.83383	0	0	2.91692	0	0	0	0	0	0	0	0
		86000-86999	0	0	0	0	0	0	0	0	0	0	0	0	0	0	0	0	0	0	0	0	0	0	0	0	0	0	0	0	0	0	0	0	0	0	0	0	0	0	2.91692	0	0	0	0	0	0	0	0
		85000-85999	0	0	0	0	0	0	0	0	0	0	0	0	0	0	0	0	0	0	0	0	0	2.91692	0	0	0	0	0	0	0	0	0	0	0	0	2.91692	0	2.91692	0	0	2.91692	0	0	2.91692	0	0	0	0
		84000-84999	5.83383	0	0	0	0	0	0	0	0	0	0	0	0	0	0	0	0	0	0	0	0	0	0	0	0	0	0	0	0	0	0	2.91692	0	0	0	0	0	0	0	0	0	0	0	0	0	0	0
		83000-83999	2.91692	0	0	0	0	0	0	0	0	0	0	0	0	0	0	0	0	0	0	0	0	0	0	0	0	0	0	0	0	0	2.91692	0	0	0	0	0	0	0	0	0	0	0	0	0	0	0	0
		82000-82999	0	0	0	0	0	0	0	0	0	0	0	0	0	0	0	0	0	0	0	0	0	0	0	0	0	0	0	0	0	0	2.91692	0	0	0	0	0	0	0	0	0	0	0	0	0	0	0	0
		81000-81999	0	0	0	0	0	0	0	0	0	0	0	0	0	0	0	0	0	0	0	0	0	0	0	0	0	0	0	0	0	0	0	0	0	0	0	0	0	0	0	0	0	0	0	0	0	0	0
		80000-80999	0	0	0	0	0	0	0	0	0	0	0	0	0	0	0	0	0	0	0	0	0	0	0	0	0	0	0	0	0	0	0	0	0	0	0	0	0	0	0	0	0	0	0	0	0	0	0
		79000-79999	0	0	0	0	0	0	0	0	0	0	0	0	0	0	0	0	0	0	0	0	0	0	0	0	0	0	0	0	0	0	0	0	0	0	0	0	0	0	0	0	0	0	0	0	0	0	0
		78000-78999	5.83383	0	0	0	0	0	0	0	0	0	0	0	0	0	0	0	0	0	0	0	0	0	0	0	0	0	0	0	0	0	0	0	0	0	0	0	0	0	0	0	0	0	0	0	0	0	0
		77000-77999	0	0	0	0	0	0	0	0	0	0	0	0	0	0	0	0	0	0	0	0	0	0	0	0	0	0	0	0	0	0	0	0	0	0	0	0	0	0	0	0	0	0	0	0	0	0	0
		76000-76999	0	0	0	0	0	0	0	0	0	0	0	0	0	0	0	0	0	0	0	0	0	0	0	0	0	0	0	0	0	0	0	0	0	0	0	0	0	0	0	0	0	0	0	0	0	0	0
		75000-75999	0	0	0	0	0	0	0	0	0	0	0	0	0	0	0	0	0	0	0	0	0	0	0	0	0	0	0	0	0	0	0	0	0	0	0	0	0	0	0	0	0	0	0	0	0	0	0
		74000-74999	0	0	0	0	0	0	0	0	0	0	0	0	0	0	0	0	0	0	0	0	0	0	0	0	2.91692	0	0	0	0	0	0	0	0	0	0	0	0	0	0	0	0	0	0	0	0	0	0
		73000-73999	0	0	0	0	0	0	0	0	0	0	0	0	0	0	0	0	0	0	0	0	0	0	0	0	0	0	0	0	0	0	0	0	0	0	0	0	0	0	0	0	0	0	0	0	0	0	0
		72000-72999	0	0	0	0	0	0	0	0	0	0	0	0	0	0	0	0	0	0	0	0	0	0	0	0	0	0	0	0	0	0	0	0	0	0	0	0	0	0	0	0	0	0	0	0	0	0	0
		71000-71999	0	0	0	0	0	0	0	0	0	0	0	0	0	0	0	2.91692	0	0	0	0	0	0	0	0	0	0	0	0	0	0	0	0	0	0	0	0	0	0	0	0	0	0	0	0	0	0	0
		70000-70999	0	0	0	0	0	0	0	0	0	0	0	0	0	0	0	0	0	0	0	0	0	0	0	0	0	0	0	0	0	0	0	0	0	0	0	0	0	0	0	0	0	0	0	0	0	0	0
		69000-69999	0	0	0	0	0	0	0	0	0	0	0	0	0	0	0	0	0	0	0	0	0	0	0	0	0	0	0	11.6677	0	0	0	0	0	0	0	0	0	0	0	0	0	0	0	0	0	0	0
		68000-68999	0	0	0	0	0	0	0	0	0	0	0	0	0	0	0	0	0	0	0	0	0	0	0	0	0	0	0	0	0	0	0	0	0	0	0	0	0	0	0	0	0	0	0	0	0	0	0
		67000-67999	2.91692	0	0	0	0	0	0	0	0	0	0	0	0	0	0	0	0	0	0	0	0	0	0	0	0	0	0	0	0	0	0	0	0	0	0	0	0	0	0	0	0	0	0	0	0	0	2.91692
		66000-66999	0	0	0	0	0	0	0	0	0	0	0	0	0	0	0	0	0	0	0	0	0	0	0	0	0	0	2.91692	0	0	0	0	20.4184	0	0	0	0	0	0	0	0	0	0	0	0	0	0	0
		65000-65999	0	0	0	0	0	0	0	0	0	0	0	0	0	0	0	0	0	0	0	0	0	0	0	0	0	0	0	0	0	0	0	0	0	0	0	0	0	0	0	0	0	0	0	0	0	0	0
		64000-64999	0	0	0	0	0	0	0	0	0	0	0	0	0	0	0	0	0	0	0	0	0	0	0	0	0	0	0	0	0	0	0	0	0	0	0	0	0	0	0	0	0	2.91692	0	0	0	0	0
		63000-63999	0	0	0	0	0	2.91692	0	0	0	0	0	0	2.91692	0	0	0	0	0	0	0	0	0	0	0	0	0	0	0	2.91692	0	0	0	0	0	0	0	0	0	0	0	0	0	0	0	0	0	0
		62000-62999	0	0	0	0	0	0	0	0	0	2.91692	0	0	0	0	0	0	0	0	0	0	2.91692	0	0	0	0	0	0	0	0	0	0	0	0	0	0	0	0	0	0	0	0	0	0	0	0	0	0
		61000-61999	0	0	0	0	0	0	0	0	0	0	0	0	0	0	0	0	0	0	0	0	0	0	0	0	0	0	0	0	0	0	0	0	0	0	0	0	0	0	0	0	0	0	0	0	0	0	0
		60000-60999	0	0	0	0	0	0	0	0	0	0	0	0	0	0	0	0	0	0	0	0	0	0	0	0	0	0	0	0	0	0	0	0	0	0	0	0	0	0	0	0	0	0	0	0	0	0	0
		59000-59999	0	0	0	0	0	0	0	0	0	0	0	0	0	0	0	0	0	0	0	0	0	0	0	0	0	0	0	0	0	0	0	0	0	0	0	0	0	0	0	0	0	0	0	0	0	0	0
		58000-58999	0	0	0	0	0	0	0	0	0	0	0	0	0	0	0	0	0	0	0	0	0	0	0	0	0	0	0	0	0	0	0	0	0	0	0	0	0	0	2.91692	0	0	0	0	0	0	0	0
		57000-57999	0	0	0	0	0	0	0	0	0	0	0	0	0	0	0	0	0	0	0	0	0	0	0	0	0	0	0	0	0	0	0	0	0	0	0	0	0	0	0	0	0	0	0	0	0	0	0
		56000-56999	0	0	0	0	0	0	0	0	0	0	0	0	0	0	0	0	0	0	0	0	0	0	0	0	0	0	0	0	0	0	0	0	0	0	0	0	0	0	0	0	0	0	0	0	2.91692	0	0
		55000-55999	0	0	0	2.91692	0	0	0	0	0	0	0	0	0	0	0	0	0	0	0	0	0	0	0	0	0	0	0	0	0	0	0	0	0	0	0	0	0	0	0	0	0	0	0	0	0	0	0
		54000-54999	0	0	0	0	2.91692	0	0	0	0	0	2.91692	0	0	0	0	0	0	0	0	0	0	0	0	0	0	0	0	0	0	0	0	0	0	0	0	0	0	0	0	0	0	0	0	0	0	0	0
		53000-53999	0	0	0	0	0	0	0	0	0	0	0	0	0	0	0	0	0	0	0	0	0	0	0	0	0	0	0	0	0	0	0	0	2.91692	0	0	0	0	0	0	0	0	0	0	0	0	0	0
		52000-52999	0	0	0	0	0	0	0	0	0	0	0	0	0	0	0	0	0	0	0	0	0	0	0	0	0	0	0	0	0	0	2.91692	0	0	0	0	0	0	0	0	0	0	0	0	0	0	0	0
		51000-51999	0	0	0	0	0	0	0	0	0	0	0	0	0	0	0	0	0	0	0	0	0	0	0	0	0	0	0	0	0	0	0	0	0	0	0	0	0	0	0	0	0	0	0	0	0	0	0
		50000-50999	0	0	0	0	0	0	0	0	0	0	0	0	0	0	0	0	0	0	0	0	0	0	0	0	0	0	0	0	0	0	0	0	0	0	0	0	0	0	0	0	0	0	0	0	0	0	0
		49000-49999	0	0	0	0	0	0	0	0	0	0	0	0	0	0	0	0	0	0	0	0	0	0	0	0	0	0	0	0	0	0	0	0	0	0	0	0	0	0	0	0	0	0	0	0	0	0	0
		48000-48999	0	0	0	0	2.91692	0	0	0	0	0	0	0	0	0	0	0	0	0	0	0	0	0	0	0	0	0	0	0	0	0	0	0	0	0	0	0	0	0	0	0	0	0	0	0	0	0	0
		47000-47999	0	0	0	0	0	0	0	0	0	0	0	0	0	0	0	0	0	0	0	0	0	0	0	0	0	0	0	0	0	0	0	0	0	0	0	0	0	0	0	0	0	0	0	0	0	2.91692	0
		46000-46999	0	0	0	0	0	0	0	0	0	0	0	0	0	0	0	0	0	0	0	0	0	0	0	0	0	0	0	0	0	0	0	0	0	0	0	2.91692	0	0	0	0	0	0	0	0	0	0	5.83383
		45000-45999	0	0	0	0	0	0	0	0	0	0	0	0	0	0	0	0	0	0	0	0	0	0	0	0	0	0	0	0	0	0	0	0	0	0	0	0	0	0	0	0	0	0	0	0	0	2.91692
		44000-44999	0	0	0	0	0	0	0	0	0	0	0	0	0	0	0	0	0	0	0	0	0	0	0	0	0	0	0	0	0	0	0	0	0	0	0	0	0	0	0	0	0	0	0	0	2.91692
		43000-43999	0	0	0	0	2.91692	0	0	0	0	0	0	0	0	0	0	0	0	0	0	0	0	0	0	0	0	0	0	0	0	0	0	0	0	0	0	0	0	0	0	0	0	0	0	2.91692
		42000-42999	0	0	0	0	0	0	0	0	0	0	0	0	0	0	0	0	0	0	0	0	0	0	0	0	0	0	0	0	0	0	0	0	0	0	0	0	0	0	0	0	0	0	0
		41000-41999	0	0	0	0	0	0	0	0	0	0	0	0	0	0	0	0	0	0	0	0	0	0	0	0	0	0	0	0	0	0	0	0	0	0	0	0	0	0	0	0	0	0
		40000-40999	0	0	0	0	0	0	0	0	0	0	0	0	0	0	0	0	0	2.91692	0	0	0	0	0	0	0	0	0	0	0	0	0	0	0	2.91692	0	0	0	0	0	0	11.6677
		39000-39999	0	0	0	0	0	0	2.91692	0	2.91692	0	0	0	0	0	0	0	0	0	0	0	0	0	0	0	0	0	0	0	0	0	0	0	0	0	0	0	0	2.91692	0	5.83383
		38000-38999	0	0	0	0	0	0	0	0	0	0	0	0	0	0	0	0	0	0	0	0	0	0	0	2.91692	0	0	0	0	0	0	0	0	0	0	0	0	0	0	0
		37000-37999	0	0	0	0	0	5.83383	0	0	0	0	0	0	0	0	0	0	0	0	0	0	0	0	0	0	0	0	0	0	0	0	0	0	0	0	0	0	0	0
		36000-36999	0	0	0	0	0	0	0	0	0	0	0	0	0	0	0	0	0	0	0	0	0	0	0	0	0	0	0	0	0	0	0	0	0	0	0	0	0
		35000-35999	0	0	0	0	0	0	0	0	0	0	0	0	0	0	0	0	0	0	0	0	0	0	0	0	0	0	0	0	0	0	0	0	0	0	0	0
		34000-34999	0	0	0	0	0	0	0	0	0	0	0	0	0	0	0	0	0	0	0	0	0	0	0	0	0	0	0	0	0	0	0	0	0	0	0
		33000-33999	0	0	0	0	0	0	0	0	0	0	0	0	0	0	0	0	0	0	0	0	0	0	0	0	0	0	0	0	0	0	0	0	0	8.75075
		32000-32999	0	0	0	0	0	0	0	0	0	0	0	0	0	0	0	0	0	0	0	0	0	0	0	0	0	0	0	0	0	0	0	0	2.91692
		31000-31999	0	0	0	0	0	0	0	0	0	0	0	0	0	0	0	0	0	0	0	0	0	0	0	0	0	0	0	0	0	0	0	23.3353
		30000-30999	0	0	0	0	0	0	0	0	0	0	0	0	0	0	0	0	0	0	0	0	2.91692	0	0	0	0	0	0	0	0	0	119.594
		29000-29999	0	0	0	0	0	0	0	0	0	0	0	0	0	0	0	0	0	0	0	0	0	0	0	0	0	0	0	0	0	0
		28000-28999	0	0	0	0	0	0	0	0	0	0	0	0	0	0	0	0	0	0	0	0	0	0	0	0	0	0	0	2.91692	0
		27000-27999	0	0	0	0	0	0	0	0	0	0	0	0	0	0	2.91692	0	0	0	0	0	0	0	0	0	0	0	0	2.91692
		26000-26999	0	0	0	0	2.91692	0	0	0	0	0	0	0	0	0	0	0	0	0	0	0	0	0	0	0	0	0	2.91692
		25000-25999	0	0	0	0	0	0	0	0	0	0	0	0	0	0	0	0	0	0	0	0	0	0	0	0	0	2.91692
		24000-24999	0	0	0	0	0	2.91692	0	0	0	0	0	2.91692	0	0	0	0	0	0	0	0	0	0	0	0	2.91692
		23000-23999	0	0	0	0	0	0	0	0	0	0	0	0	0	0	5.83383	0	0	0	0	5.83383	0	2.91692	0	0
		22000-22999	0	0	0	0	0	0	0	0	0	0	0	0	0	0	0	0	0	0	0	0	0	0	0
		21000-21999	0	0	0	0	0	0	0	0	0	0	0	0	0	0	0	0	0	0	0	0	0	2.91692
		20000-20999	0	0	0	0	0	0	0	0	2.91692	0	0	0	0	0	0	0	0	0	0	5.83383	0
		19000-19999	0	0	0	0	0	0	0	0	0	0	0	0	0	0	0	0	0	0	0	2.91692
		18000-18999	0	0	0	0	0	0	0	0	0	0	0	0	0	0	0	0	0	0	0
		17000-17999	0	0	0	0	0	0	0	0	0	0	0	0	0	0	0	0	0	2.91692
		16000-16999	0	0	0	0	0	0	0	0	0	0	0	0	0	0	0	0	2.91692
		15000-15999	0	0	0	0	0	0	0	0	0	2.91692	0	0	0	0	0	0
		14000-14999	0	0	0	0	0	0	0	0	0	0	0	0	0	0	11.6677
		13000-13999	0	0	0	0	0	0	0	0	0	0	0	0	0	0
		12000-12999	0	0	0	0	0	0	0	0	0	0	0	0	0
		11000-11999	0	0	0	0	0	0	0	0	0	0	2.91692	2.91692
		10000-10999	0	0	0	0	0	0	0	0	0	0	0
		9000-9999	0	0	0	0	0	0	0	0	0	0
		8000-8999	0	0	0	0	0	0	5.83383	0	0
		7000-7999	0	0	0	0	0	0	0	0
		6000-6999	0	0	0	0	0	0	0
		5000-5999	0	0	0	0	0	8.75075
		4000-4999	2.91692	0	0	2.91692	2.91692
		3000-3999	0	0	0	2.91692
		2000-2999	0	0	0
		1000-1999	5.83383	2.91692
		0-999	26.2522
[truncated: 82 more columns]

## Sheet: Supp. Table S3
Rearrangement junctions per position per 10000 plastid genomes in A. thaliana Ws-2
Organism		Genome Positions	0-999	1000-1999	2000-2999	3000-3999	4000-4999	5000-5999	6000-6999	7000-7999	8000-8999	9000-9999	10000-10999	11000-11999	12000-12999	13000-13999	14000-14999	15000-15999	16000-16999	17000-17999	18000-18999	19000-19999	20000-20999	21000-21999	22000-22999	23000-23999	24000-24999	25000-25999	26000-26999	27000-27999	28000-28999	29000-29999	30000-30999	31000-31999	32000-32999	33000-33999	34000-34999	35000-35999	36000-36999	37000-37999	38000-38999	39000-39999	40000-40999	41000-41999	42000-42999	43000-43999	44000-44999	45000-45999	46000-46999
A.thaliana		128000-128214	2.01573	0	0	0	0	0	0	0	0	0	0	0	0	0	0	0	0	0	0	0	0	0	0	0	0	0	0	0	0	0	0	0	0	0	0	0	0	0	0	0	0	0	0	0	0	0	0
Genome		127000-127999	0	0	0	0	0	0	0	0	0	0	0	0	0	0	0	0	0	0	0	0	0	0	0	0	0	0	0	0	2.01573	2.01573	0	0	0	0	0	0	0	0	0	0	0	0	0	0	0	0	0
Plastid		126000-126999	0	0	0	0	0	0	0	0	0	0	0	0	0	0	0	0	0	0	0	0	0	2.01573	0	0	0	0	0	0	0	0	0	0	2.01573	0	0	0	0	0	0	0	0	0	0	0	0	0	0
Line		125000-125999	0	0	0	0	0	0	0	0	0	0	0	0	0	0	0	0	0	0	0	0	0	0	0	0	0	0	0	0	0	0	0	0	0	0	0	0	0	0	0	0	0	0	0	0	0	0	0
Ws-2		124000-124999	0	2.01573	0	0	0	0	0	0	0	0	0	0	0	0	0	0	0	0	0	0	0	0	0	0	0	0	0	0	0	0	2.01573	0	0	0	0	0	0	0	0	0	0	0	0	0	0	0	0
Mutations		123000-123999	0	0	0	0	0	0	0	0	0	0	0	0	0	0	0	0	0	0	0	0	0	0	0	0	0	0	0	0	0	0	0	0	0	0	2.01573	0	0	0	0	0	0	0	0	0	0	0	0
WT		122000-122999	0	0	0	0	0	0	0	0	0	0	0	0	0	0	0	4.03146	0	0	2.01573	0	0	2.01573	0	0	0	0	0	0	0	0	0	0	0	0	0	0	0	0	0	0	0	0	0	0	0	0	0
Total Reads		121000-121999	0	0	0	0	0	0	0	0	0	0	0	2.01573	0	0	0	0	0	0	0	0	0	0	0	0	0	0	0	0	0	0	0	0	0	0	0	0	0	0	0	0	0	0	0	0	0	0	0
7663634		120000-120999	0	0	0	0	0	0	0	0	0	0	0	0	0	0	0	0	0	0	0	0	0	0	0	0	0	0	0	0	0	0	0	0	0	0	0	0	0	0	0	0	0	0	0	0	0	0	0
Total Bases		119000-119999	0	2.01573	0	0	0	0	0	0	0	0	0	0	0	0	2.01573	0	0	0	0	0	0	0	0	0	0	0	0	0	0	0	0	0	0	0	0	0	0	0	0	0	0	0	0	0	0	0	0
766363400		118000-118999	0	0	0	0	0	0	0	0	0	0	0	0	0	0	0	0	0	0	0	0	0	0	0	0	0	0	0	0	0	0	0	0	0	0	0	0	0	0	0	0	0	0	0	0	0	0	0
Genome Size		117000-117999	0	0	0	0	0	0	0	0	0	0	0	0	0	0	0	0	0	0	0	0	0	0	0	0	0	0	0	0	0	0	0	0	0	0	0	0	0	0	0	0	0	0	0	0	0	0	0
154478		116000-116999	0	0	0	0	0	0	0	0	0	0	0	0	0	0	0	0	0	0	0	0	0	0	0	0	0	0	0	0	0	0	0	0	0	0	0	0	0	0	0	0	0	0	0	0	0	0	0
Multiplier		115000-115999	0	0	0	0	0	0	0	0	0	0	0	0	0	0	0	0	0	0	0	0	0	0	0	0	0	0	0	0	0	0	0	0	0	0	0	0	0	0	2.01573	0	0	0	0	0	0	0	0
2.01573		114000-114999	0	0	0	0	0	0	0	0	0	0	0	0	0	0	0	0	0	0	0	0	0	0	0	0	0	0	0	0	0	0	0	0	0	0	0	0	0	0	0	0	0	0	0	0	0	0	0
		113000-113999	0	0	0	0	0	0	0	0	0	0	0	0	0	0	0	0	0	0	0	0	0	0	0	0	0	0	0	0	0	0	0	0	0	0	0	0	0	0	0	0	0	0	0	0	0	0	0
Color Scale		112000-112999	0	0	0	0	0	0	0	0	0	0	0	0	0	0	0	0	0	0	0	0	0	0	0	0	0	0	0	0	0	0	0	0	0	0	0	0	0	0	0	0	0	0	0	0	0	0	0
0		111000-111999	0	0	0	0	0	0	0	0	0	0	0	0	0	0	0	0	0	0	0	0	0	0	0	0	0	0	0	0	0	0	0	0	0	0	0	0	0	2.01573	0	0	4.03146	0	0	0	0	0	0
1		110000-110999	0	0	0	0	0	0	0	0	0	0	0	0	0	2.01573	0	0	0	0	0	0	0	0	0	0	0	0	0	0	0	0	0	0	0	0	0	0	2.01573	0	0	0	0	0	0	2.01573	0	0	0
2		109000-109999	0	0	0	0	0	0	0	0	0	0	0	0	0	0	0	2.01573	0	0	0	0	0	2.01573	0	0	0	0	0	0	0	2.01573	0	0	0	0	0	0	0	0	0	0	0	0	0	0	0	0	0
3		108000-108999	0	0	0	0	0	2.01573	0	0	0	0	0	0	0	0	0	2.01573	0	2.01573	0	0	0	0	0	0	0	0	0	0	0	0	0	0	0	0	0	0	0	0	0	0	0	0	0	0	0	0	2.01573
4		107000-107999	0	0	0	0	0	0	0	0	0	0	0	0	0	0	0	0	0	0	0	0	0	0	0	2.01573	0	0	0	0	0	0	0	0	0	0	0	0	2.01573	0	2.01573	0	0	0	0	0	0	0	0
5		106000-106999	0	0	0	0	0	0	0	0	0	0	0	0	0	0	0	2.01573	0	0	0	0	0	0	0	0	0	0	0	0	0	0	0	0	0	0	4.03146	0	0	2.01573	0	0	0	2.01573	0	0	0	0	0
6		105000-105999	0	0	0	0	0	0	0	0	0	0	0	0	0	0	0	0	0	0	0	2.01573	0	0	0	0	0	0	0	0	0	0	0	0	0	0	0	0	2.01573	0	0	0	0	0	0	0	0	0	0
7		104000-104999	0	0	0	0	0	0	2.01573	0	0	0	0	0	0	0	0	2.01573	2.01573	0	0	0	0	0	0	0	0	0	0	0	0	0	0	0	0	0	0	0	0	0	0	0	0	0	0	0	0	0	0
8		103000-103999	2.01573	0	0	0	0	0	0	2.01573	0	0	0	0	0	0	0	0	0	0	0	0	0	0	0	0	0	0	0	0	0	0	0	0	0	0	0	0	0	0	0	0	0	0	2.01573	2.01573	0	0	0
9		102000-102999	0	0	0	0	0	0	0	0	0	0	2.01573	0	0	0	0	0	0	0	0	0	0	0	0	2.01573	0	0	0	0	0	0	0	0	0	0	0	0	0	0	0	0	0	2.01573	0	0	0	0	0
10		101000-101999	0	0	0	0	0	0	0	0	0	0	0	0	0	0	0	0	0	0	0	0	2.01573	0	0	0	0	0	0	0	0	2.01573	0	0	0	0	0	0	0	0	0	0	0	0	0	0	0	0	0
11		100000-100999	0	0	0	0	0	0	2.01573	0	0	10.0786	0	0	0	0	0	0	0	0	0	2.01573	0	0	0	0	0	0	0	0	0	0	0	0	0	0	2.01573	0	0	0	0	0	0	0	0	0	0	2.01573	2.01573
12		99000-99999	0	0	2.01573	0	0	0	0	0	0	0	0	0	0	0	0	0	0	4.03146	0	0	0	0	0	0	0	0	0	0	0	6.04718	0	0	0	0	0	0	0	0	0	0	2.01573	0	0	0	0	0	0
13		98000-98999	0	0	0	0	0	0	0	0	0	0	2.01573	0	0	0	0	0	0	0	0	0	0	0	0	0	0	2.01573	0	0	0	0	0	0	0	0	0	0	0	2.01573	0	0	0	0	2.01573	0	0	0	0
14		97000-97999	0	0	0	0	0	0	2.01573	0	0	0	0	0	0	0	0	0	0	0	0	0	0	0	0	0	0	2.01573	0	0	0	0	0	0	0	0	0	2.01573	0	2.01573	2.01573	0	0	0	0	0	0	0	0
15		96000-96999	0	0	0	0	0	0	0	0	0	0	0	0	0	0	0	0	0	0	0	0	0	0	0	0	0	0	0	0	0	0	0	0	0	0	0	0	0	0	0	0	0	0	0	0	0	0	0
		95000-95999	0	0	0	0	0	0	0	0	0	0	0	0	0	0	0	0	0	0	0	0	0	0	0	0	0	0	0	0	0	0	0	0	0	0	0	0	0	0	0	0	0	0	0	0	0	0	0
		94000-94999	0	0	0	0	0	0	0	0	0	2.01573	0	0	0	0	0	0	0	0	0	0	0	0	0	0	0	0	0	0	0	0	0	0	0	0	2.01573	0	0	0	0	0	0	0	0	0	0	0	2.01573
		93000-93999	0	0	0	0	0	0	0	0	0	0	0	0	2.01573	0	0	0	0	0	0	0	0	0	0	0	0	0	2.01573	0	0	0	0	0	0	0	0	0	0	0	0	0	0	0	12.0944	0	0	0	0
		92000-92999	0	0	0	0	0	0	0	0	0	0	0	0	0	2.01573	0	0	0	0	0	0	0	2.01573	0	2.01573	0	0	0	0	0	0	0	0	0	0	0	0	0	0	0	0	0	0	0	0	0	2.01573	0
		91000-91999	0	0	0	0	0	0	0	0	0	0	0	0	0	0	0	0	0	0	0	0	0	0	0	0	0	0	0	0	0	0	0	0	2.01573	0	0	0	0	0	0	0	0	2.01573	0	0	0	0	0
		90000-90999	2.01573	0	0	0	0	0	0	0	0	0	0	0	0	0	0	0	0	0	0	0	0	0	0	0	0	0	0	0	0	0	0	0	0	0	0	0	0	0	0	2.01573	0	0	0	2.01573	0	0	0
		89000-89999	0	0	0	0	0	0	0	0	0	0	0	0	0	0	0	0	0	0	0	0	0	0	2.01573	0	0	2.01573	0	0	0	0	0	0	0	0	0	0	0	0	0	2.01573	2.01573	0	0	0	0	0	0
		88000-88999	0	2.01573	0	0	0	0	0	0	0	0	0	0	0	2.01573	0	0	0	2.01573	0	0	0	0	0	0	0	0	0	0	0	0	0	0	0	0	0	0	0	0	0	0	0	0	0	0	0	2.01573	0
		87000-87999	0	0	0	0	0	0	0	0	0	0	0	0	0	0	0	0	0	0	0	0	2.01573	0	0	0	0	0	2.01573	0	0	0	0	0	0	0	0	0	0	0	0	2.01573	0	0	0	0	0	0	0
		86000-86999	0	0	0	0	0	0	0	0	0	0	0	2.01573	0	0	2.01573	2.01573	0	0	0	4.03146	0	0	0	0	0	0	0	0	0	0	0	0	0	0	0	0	0	0	2.01573	0	0	0	0	0	0	0	0
		85000-85999	0	0	0	0	0	0	0	0	0	0	0	0	0	0	0	0	0	0	0	0	0	0	0	0	0	0	0	0	0	0	0	0	0	0	0	0	0	0	0	0	0	0	0	0	0	0	0
		84000-84999	28.2202	0	0	0	0	0	0	0	0	0	0	0	0	0	0	0	0	0	0	0	0	0	0	0	0	0	0	0	0	0	0	0	0	0	2.01573	0	0	0	0	0	0	0	0	2.01573	0	0	0
		83000-83999	0	0	0	0	0	0	0	0	0	0	0	0	0	0	0	0	0	0	0	0	0	0	0	0	0	0	0	0	0	0	0	0	0	0	0	0	0	0	0	0	0	0	0	0	0	0	0
		82000-82999	0	0	0	0	0	0	0	0	0	0	0	0	0	0	0	0	0	0	0	0	0	0	0	0	0	0	0	0	0	0	0	0	0	0	0	0	0	0	0	0	0	0	0	0	0	0	0
		81000-81999	0	0	0	0	0	0	0	0	0	0	0	0	0	0	0	0	0	0	0	0	0	0	0	0	0	0	0	0	0	0	0	0	0	0	0	0	0	0	0	0	0	0	0	2.01573	0	0	0
		80000-80999	0	0	0	0	0	0	0	0	0	0	0	0	0	2.01573	0	0	0	0	0	0	0	0	0	0	0	0	0	0	0	0	0	0	0	0	0	0	0	0	0	0	0	0	0	0	0	0	0
		79000-79999	0	0	0	0	0	0	0	0	0	0	0	0	0	0	0	0	0	0	0	0	0	0	0	0	0	0	0	2.01573	0	0	0	0	0	0	0	0	0	0	0	0	0	0	0	0	0	0	0
		78000-78999	0	0	0	0	0	0	0	0	0	0	0	0	0	0	2.01573	0	0	0	0	0	0	0	0	0	0	0	0	0	0	0	0	0	0	0	0	0	0	0	0	0	0	2.01573	0	0	0	0	0
		77000-77999	0	0	0	0	0	0	0	0	0	0	0	0	0	0	0	0	0	0	0	0	0	0	0	0	0	0	0	0	0	0	0	0	0	0	0	0	0	0	4.03146	0	0	0	0	0	0	0	0
		76000-76999	0	0	0	0	0	0	0	0	0	0	0	0	0	2.01573	0	0	0	0	0	2.01573	0	0	0	0	0	0	0	0	0	0	0	2.01573	0	0	0	0	0	0	0	0	0	0	0	0	0	0	0
		75000-75999	0	0	0	0	0	0	0	0	0	0	0	0	0	0	0	0	0	0	0	0	0	2.01573	0	0	0	0	0	0	0	0	0	0	0	0	0	0	0	0	0	0	0	0	0	0	0	0	0
		74000-74999	0	0	0	2.01573	0	0	0	0	0	0	0	0	0	0	0	0	0	0	0	0	0	0	0	0	0	0	0	0	0	0	0	0	0	0	0	0	0	0	0	0	0	0	0	0	0	0	0
		73000-73999	0	0	0	0	0	0	0	0	0	0	0	0	0	0	0	0	0	0	0	0	0	0	0	2.01573	0	0	0	0	0	0	0	0	0	0	0	0	0	0	0	0	0	0	0	0	0	0	0
		72000-72999	0	0	0	0	0	0	0	0	0	0	0	0	0	0	0	0	0	0	0	0	0	0	0	0	0	44.346	0	0	0	0	0	0	0	0	0	0	0	0	0	0	0	0	0	0	0	0	0
		71000-71999	2.01573	0	0	0	0	0	0	0	0	0	0	0	0	0	0	0	0	0	0	0	0	0	0	0	0	0	0	0	0	0	0	0	0	0	0	0	0	0	0	0	0	0	0	0	0	0	0
		70000-70999	0	0	0	0	2.01573	0	0	0	0	0	0	0	0	0	0	0	0	0	0	0	0	0	0	0	0	0	0	0	0	0	0	0	0	0	0	0	0	2.01573	0	0	0	0	0	0	0	0	0
		69000-69999	0	0	0	0	0	0	0	0	0	0	0	0	0	0	0	0	0	0	0	0	0	0	0	0	0	0	0	6.04718	0	10.0786	0	0	0	0	0	0	0	0	0	0	0	0	0	0	0	0	0
		68000-68999	0	0	0	0	0	0	0	0	0	0	0	0	0	0	0	0	0	0	0	0	0	0	0	0	0	0	0	0	0	0	0	0	0	0	0	0	0	0	0	0	0	0	0	0	0	0	2.01573
		67000-67999	0	0	0	0	0	0	0	0	0	0	0	0	4.03146	0	0	0	0	0	0	0	0	0	0	0	0	0	0	0	0	0	0	0	0	0	0	0	0	0	0	0	0	0	0	0	0	0	0
		66000-66999	0	0	2.01573	0	0	0	0	0	0	0	0	0	0	0	0	0	0	0	0	0	6.04718	0	0	0	0	0	0	0	0	0	0	2.01573	0	0	0	0	0	0	0	0	0	0	0	0	0	0	0
		65000-65999	0	0	0	0	0	0	0	0	0	0	0	0	0	0	0	0	0	0	0	0	0	0	0	0	0	0	0	0	0	0	0	0	0	0	0	0	0	0	0	0	0	0	0	0	0	0	0
		64000-64999	0	0	0	0	0	0	0	0	0	0	0	0	0	0	0	0	0	0	0	0	0	0	0	0	0	0	0	0	0	0	0	0	0	0	0	0	0	0	0	0	0	0	0	0	0	0	0
		63000-63999	0	0	0	0	0	0	0	0	0	0	0	0	0	0	0	0	0	0	0	0	0	0	0	0	0	0	0	0	0	0	0	0	0	0	0	0	0	0	0	0	0	0	0	2.01573	0	0	0
		62000-62999	0	0	0	0	0	0	0	0	0	0	0	0	0	0	0	0	0	0	0	0	2.01573	0	0	0	0	0	0	0	0	0	0	0	0	0	0	0	0	0	0	0	0	2.01573	0	0	0	0	0
		61000-61999	2.01573	0	0	0	0	0	0	0	0	0	0	2.01573	0	2.01573	0	0	0	0	0	0	0	0	0	0	0	0	0	0	0	0	0	0	0	0	0	0	0	0	0	0	0	0	0	0	0	0	0
		60000-60999	0	0	0	0	0	0	0	0	0	0	0	0	0	0	0	0	0	0	0	0	0	0	0	0	0	0	0	0	0	0	0	0	0	0	0	0	0	0	0	0	0	0	0	0	0	0	0
		59000-59999	0	0	0	0	0	0	0	0	0	0	0	0	0	0	0	0	0	0	2.01573	0	0	0	0	0	0	0	0	0	0	0	0	0	0	0	0	0	0	0	0	0	0	0	0	0	0	0	0
		58000-58999	0	0	0	0	0	0	0	0	0	0	0	0	2.01573	0	0	0	0	0	0	0	0	0	0	0	0	0	0	0	0	0	0	0	0	0	0	0	0	0	0	0	0	0	0	0	0	0	0
		57000-57999	0	0	0	0	0	0	0	0	0	0	0	2.01573	0	0	0	0	0	0	0	0	0	0	2.01573	0	0	0	0	0	0	0	0	0	0	0	0	0	0	0	0	0	0	0	0	0	0	0	0
		56000-56999	0	0	0	0	0	0	0	0	0	0	0	0	0	0	0	0	0	0	0	0	0	0	2.01573	0	0	0	0	0	0	0	0	0	0	0	0	0	0	0	0	0	0	0	0	0	0	0	0
		55000-55999	0	0	0	0	2.01573	0	0	0	0	0	0	0	0	0	0	0	2.01573	0	0	0	0	0	0	0	0	0	0	0	0	0	0	0	0	0	0	0	0	0	0	0	2.01573	0	0	0	0	0	0
		54000-54999	0	0	0	0	0	0	0	0	0	0	0	0	0	0	0	0	0	0	0	0	0	0	0	0	0	0	0	0	0	0	0	0	0	0	0	0	0	0	0	0	0	0	0	0	0	0	0
		53000-53999	0	0	0	0	0	0	0	0	0	0	0	0	0	0	0	0	0	0	0	0	0	0	0	0	0	0	0	0	0	0	0	0	0	0	0	0	0	0	0	0	0	0	0	0	0	0	0
		52000-52999	0	0	0	0	0	0	0	0	0	0	0	0	0	0	0	0	0	0	0	0	0	0	0	0	0	0	0	0	0	0	0	0	0	0	0	0	0	0	0	0	0	0	2.01573	0	0	0	0
		51000-51999	0	0	0	0	0	0	0	0	0	0	0	0	0	0	0	0	0	0	0	0	0	0	0	0	0	0	0	2.01573	0	0	0	0	0	0	0	0	0	0	0	0	0	0	0	0	0	0	0
		50000-50999	0	0	0	0	0	0	0	0	0	0	0	0	0	0	0	0	0	0	0	0	0	0	0	0	0	0	0	0	0	0	0	0	0	0	0	0	0	0	0	0	0	0	0	0	0	0	0
		49000-49999	0	0	0	0	0	0	0	0	0	0	0	0	0	0	0	0	0	0	0	0	0	0	0	0	0	0	0	0	0	0	0	0	0	0	0	0	0	0	0	0	0	0	0	0	0	2.01573	0
		48000-48999	0	0	0	0	0	0	0	0	0	0	0	0	0	0	0	0	0	0	0	0	0	0	0	0	0	0	0	0	0	0	0	0	2.01573	0	0	0	0	0	0	0	0	0	0	0	0	0	0
		47000-47999	0	0	0	0	0	0	0	0	2.01573	0	0	0	0	0	0	0	0	0	0	0	0	0	0	2.01573	0	0	0	0	0	0	0	0	0	0	0	0	0	0	0	0	0	0	0	0	0	0	0
		46000-46999	0	0	0	0	0	0	0	0	0	0	0	0	0	0	2.01573	0	0	0	0	0	0	0	0	0	0	0	0	0	0	0	0	0	0	0	0	0	0	0	0	0	0	0	0	0	0	0	4.03146
		45000-45999	0	0	0	0	0	0	0	0	0	0	0	0	0	0	0	0	0	0	0	0	0	0	0	0	0	0	0	0	0	0	2.01573	0	0	0	0	0	0	0	0	0	0	0	0	0	0	24.1887
		44000-44999	0	0	0	0	0	0	0	0	0	0	0	0	0	0	0	0	2.01573	0	0	0	0	0	0	0	0	0	0	0	0	0	0	0	0	0	0	0	0	0	0	0	0	0	0	0	4.03146
		43000-43999	0	0	0	0	0	0	0	0	0	0	0	0	0	0	0	0	0	0	0	0	0	0	0	0	0	0	0	0	0	0	0	0	0	0	0	0	0	0	0	0	0	0	0	2.01573
		42000-42999	0	0	0	0	0	2.01573	0	0	0	0	0	0	0	0	0	0	0	0	0	0	0	0	0	0	0	0	0	0	0	0	0	0	0	0	0	0	0	0	0	0	0	0	0
		41000-41999	0	0	0	0	0	0	0	0	0	0	0	0	0	0	0	0	0	0	0	0	0	0	0	0	2.01573	0	0	0	0	0	0	0	0	0	0	0	0	0	2.01573	0	0	2.01573
		40000-40999	0	0	0	0	0	0	0	0	0	0	0	0	0	0	0	0	0	0	0	0	0	0	0	0	0	0	0	0	0	0	0	0	0	0	0	0	0	4.03146	0	0	4.03146
		39000-39999	0	0	0	0	0	0	0	0	0	0	0	0	0	0	0	0	0	0	0	0	0	0	0	0	0	0	0	0	0	0	0	0	0	0	0	0	0	4.03146	2.01573	6.04718
		38000-38999	0	0	0	0	0	0	0	0	0	0	0	0	0	0	0	0	0	0	0	0	0	2.01573	2.01573	0	0	0	0	0	0	0	0	0	0	0	0	0	0	2.01573	2.01573
		37000-37999	0	0	0	0	0	0	0	0	0	0	0	0	0	0	0	0	0	0	0	0	0	0	0	0	0	0	0	0	0	0	0	0	0	0	2.01573	2.01573	0	6.04718
		36000-36999	0	0	0	0	0	0	0	0	0	2.01573	0	0	0	0	0	0	0	0	0	0	0	0	0	0	0	0	0	0	2.01573	0	0	0	0	0	0	0	2.01573
		35000-35999	0	0	0	0	0	0	0	0	0	0	0	0	0	0	0	0	0	0	0	0	0	0	0	0	0	0	0	0	0	0	0	0	0	0	4.03146	6.04718
		34000-34999	0	0	0	0	0	0	0	0	0	0	0	0	0	0	0	0	0	0	0	0	0	0	0	0	0	0	0	0	0	0	0	0	2.01573	0	2.01573
		33000-33999	0	0	0	0	0	0	0	0	0	0	0	0	0	0	0	0	0	0	0	0	0	0	0	0	0	0	0	0	0	0	0	0	0	4.03146
		32000-32999	0	0	0	0	0	0	0	0	0	0	0	0	0	0	0	2.01573	0	0	0	0	0	0	0	0	0	0	0	0	0	0	0	0	4.03146
		31000-31999	0	0	0	0	0	0	0	0	0	2.01573	0	0	0	0	0	0	0	0	0	0	0	0	0	0	0	0	0	0	0	0	0	0
		30000-30999	0	0	0	0	0	0	0	0	0	0	0	0	0	0	0	0	0	0	0	0	0	0	0	0	0	0	0	0	0	0	2.01573
		29000-29999	0	2.01573	0	0	0	0	0	0	0	0	0	0	0	0	0	0	0	0	0	0	0	0	0	0	0	0	0	0	0	0
		28000-28999	0	0	0	0	0	0	0	0	0	0	0	0	2.01573	0	0	0	0	0	0	0	0	0	0	2.01573	0	0	0	0	10.0786
		27000-27999	0	0	0	0	0	0	0	0	0	0	0	0	0	0	0	0	0	0	0	0	2.01573	0	0	0	0	0	0	2.01573
		26000-26999	0	0	0	0	0	0	0	0	0	0	0	0	0	0	0	0	0	0	0	0	0	0	0	0	4.03146	0	2.01573
		25000-25999	0	0	0	0	0	0	0	0	0	0	0	0	0	0	0	0	14.1101	0	0	0	0	0	0	0	0	0
		24000-24999	0	0	0	0	0	2.01573	0	0	0	0	0	0	0	0	0	0	0	0	0	0	0	0	0	0	2.01573
		23000-23999	0	0	0	0	0	0	0	0	0	0	0	0	0	0	0	0	0	0	0	0	0	0	0	6.04718
		22000-22999	0	0	0	0	0	2.01573	0	0	0	0	0	0	0	0	0	0	0	0	0	0	0	2.01573	0
		21000-21999	0	0	0	0	0	2.01573	0	0	0	0	0	0	0	0	0	0	0	0	0	0	0	0
		20000-20999	0	0	0	0	0	0	0	0	0	0	0	0	0	0	0	0	0	0	0	0	6.04718
		19000-19999	0	0	0	0	0	0	0	0	0	0	0	0	0	0	0	0	0	0	0	0
		18000-18999	0	0	0	0	0	0	0	0	0	0	0	0	0	0	0	0	4.03146	0	4.03146
		17000-17999	0	0	0	0	0	0	0	0	0	0	0	0	2.01573	0	0	0	0	0
		16000-16999	0	0	0	0	0	0	0	0	0	0	0	0	0	0	0	0	2.01573
		15000-15999	0	0	0	0	0	0	0	0	0	0	0	0	0	0	0	2.01573
		14000-14999	0	0	0	2.01573	0	0	0	0	0	0	0	0	0	0	0
		13000-13999	0	0	0	0	0	0	0	0	0	0	0	0	0	2.01573
		12000-12999	0	0	0	0	0	0	0	0	0	0	0	0	0
		11000-11999	0	0	0	0	0	0	0	0	0	0	0	4.03146
		10000-10999	0	0	0	0	0	0	0	0	0	0	6.04718
		9000-9999	0	0	0	0	0	0	0	0	16.1258	16.1258
		8000-8999	0	0	0	0	4.03146	0	2.01573	0	0
		7000-7999	0	0	0	0	0	0	2.01573	2.01573
		6000-6999	0	0	0	0	0	0	2.01573
		5000-5999	0	0	0	0	2.01573	0
		4000-4999	0	0	0	2.01573	6.04718
		3000-3999	0	0	0	4.03146
		2000-2999	0	0	0
		1000-1999	0	4.03146
		0-999	44.346
[truncated: 82 more columns]
