# Supplementary material for: Organelle DNA rearrangement mapping reveals U-turn-like inversions as a major source of genomic instability in Arabidopsis and humans
Source: HighWire-hosted journal article supplement (doi:10.1101/gr.188573.114), 2015-03-23
Supplement: SuppTablesS5-12.xlsx [file SuppTablesS5-12.xlsx]

## Sheet: Supp. Table S5
Rearrangement junctions per position per 10000 mitochondrion genomes in human brain
Organism	Color Scale	Genome Positions	0-999	1000-1999	2000-2999	3000-3999	4000-4999	5000-5999	6000-6999	7000-7999	8000-8999	9000-9999	10000-10999	11000-11999	12000-12999	13000-13999	14000-14999	15000-15999	16000-16999
Human	0	16000-16999	0	0	0	0	0	0	0	0	0	0	0	0	0	0	0	0	8.26854
Genome	1	15000-15999	0	0	0	0	0	0	0	0	2.75618	0	2.75618	2.75618	0	0	0	27.5618
Mitochondrion	2	14000-14999	0	0	0	0	0	0	0	0	2.75618	0	0	0	0	0	8.26854
Tissue	3	13000-13999	0	0	0	0	0	0	0	0	0	0	0	0	5.51236	13.7809
Brain	4	12000-12999	0	0	0	0	0	0	0	0	2.75618	0	0	0	27.5618
Accession	5	11000-11999	0	0	0	0	0	0	2.75618	0	0	0	0	2.75618
ERX385572	6	10000-10999	0	0	0	0	0	0	0	0	0	5.51236	24.8056
Total Reads	7	9000-9999	0	0	0	0	0	0	0	0	0	11.0247
595206	8	8000-8999	0	0	0	0	0	0	0	0	19.2933
Total Bases	9	7000-7999	0	0	2.75618	0	0	0	0	13.7809
60115806	10	6000-6999	0	0	0	2.75618	0	0	22.0494
Genome Size	11	5000-5999	2.75618	0	0	0	2.75618	24.8056
16569	12	4000-4999	2.75618	0	0	0	5.51236
Multiplier	13	3000-3999	0	0	0	2.75618
2.75618	14	2000-2999	0	2.75618	11.0247
	15	1000-1999	0	8.26854
		0-999	24.8056

## Sheet: Supp. Table S6
Rearrangement junctions per position per 10000 mitochondrion genomes in human brain
Organism	Color Scale	Genome Positions	0-999	1000-1999	2000-2999	3000-3999	4000-4999	5000-5999	6000-6999	7000-7999	8000-8999	9000-9999	10000-10999	11000-11999	12000-12999	13000-13999	14000-14999	15000-15999	16000-16999
Human	0	16000-16999	0	0	0	0	0	0	0	0	0	0	0	0	0	0	0	2.72227	5.44453
Genome	1	15000-15999	0	0	0	0	0	0	0	0	0	0	0	5.44453	0	0	0	10.8891
Mitochondrion	2	14000-14999	0	0	0	2.72227	2.72227	5.44453	0	0	0	2.72227	0	2.72227	0	5.44453	16.3336
Tissue	3	13000-13999	0	0	0	0	0	0	2.72227	0	2.72227	5.44453	0	0	5.44453	13.6113
Brain	4	12000-12999	0	0	0	0	2.72227	0	2.72227	0	0	0	2.72227	0	13.6113
Accession	5	11000-11999	0	0	0	0	0	0	0	0	0	0	0	5.44453
ERX385573	6	10000-10999	0	2.72227	0	0	0	0	0	0	0	0	13.6113
Total Reads	7	9000-9999	0	0	0	0	0	0	0	0	0	8.1668
602621	8	8000-8999	0	0	0	0	0	0	0	0	5.44453
Total Bases	9	7000-7999	0	0	0	0	0	0	0	10.8891
60864721	10	6000-6999	0	0	0	0	0	0	10.8891
Genome Size	11	5000-5999	0	0	0	0	0	2.72227
16569	12	4000-4999	0	0	0	0	16.3336
Multiplier	13	3000-3999	0	0	2.72227	16.3336
2.72227	14	2000-2999	0	2.72227	10.8891
	15	1000-1999	0	10.8891
		0-999	16.3336

## Sheet: Supp. Table S7
Rearrangement junctions per position per 10000 mitochondrion genomes in human brain
Organism	Color Scale	Genome Positions	0-999	1000-1999	2000-2999	3000-3999	4000-4999	5000-5999	6000-6999	7000-7999	8000-8999	9000-9999	10000-10999	11000-11999	12000-12999	13000-13999	14000-14999	15000-15999	16000-16999
Human	0	16000-16999	5.07744	0	0	0	0	0	0	0	0	0	2.53872	2.53872	2.53872	0	0	2.53872	15.2323
Genome	1	15000-15999	0	0	0	2.53872	0	0	0	0	2.53872	0	0	0	0	0	0	27.9259
Mitochondrion	2	14000-14999	0	0	0	0	2.53872	0	5.07744	2.53872	0	0	7.61616	0	0	0	30.4646
Tissue	3	13000-13999	2.53872	0	0	0	0	0	0	0	0	0	2.53872	0	0	17.771
Brain	4	12000-12999	0	0	0	0	0	0	0	0	2.53872	0	0	2.53872	35.5421
Accession	5	11000-11999	0	0	0	2.53872	0	0	0	0	0	0	0	7.61616
ERX385574	6	10000-10999	0	0	0	0	0	0	0	0	0	0	15.2323
Total Reads	7	9000-9999	2.53872	0	2.53872	0	0	0	0	0	0	17.771
646190	8	8000-8999	0	0	0	0	0	2.53872	0	0	20.3098
Total Bases	9	7000-7999	0	0	0	0	0	0	0	27.9259
65265190	10	6000-6999	0	0	0	0	0	0	30.4646
Genome Size	11	5000-5999	0	0	0	0	0	38.0808
16569	12	4000-4999	0	0	0	0	22.8485
Multiplier	13	3000-3999	0	0	0	5.07744
2.53872	14	2000-2999	0	0	33.0034
	15	1000-1999	0	10.1549
		0-999	20.3098

## Sheet: Supp. Table S8
Rearrangement junctions per position per 10000 mitochondrion genomes in human brain
Organism	Color Scale	Genome Positions	0-999	1000-1999	2000-2999	3000-3999	4000-4999	5000-5999	6000-6999	7000-7999	8000-8999	9000-9999	10000-10999	11000-11999	12000-12999	13000-13999	14000-14999	15000-15999	16000-16999
Human	0	16000-16999	0	0	0	0	0	0	0	0	0	0	2.50628	0	0	0	0	0	7.51885
Genome	1	15000-15999	0	0	0	0	0	0	2.50628	5.01257	0	5.01257	0	0	0	5.01257	2.50628	10.0251
Mitochondrion	2	14000-14999	2.50628	0	0	0	0	0	0	0	0	0	0	0	0	0	22.5565
Tissue	3	13000-13999	0	0	0	0	0	0	0	0	0	0	2.50628	0	0	7.51885
Brain	4	12000-12999	0	0	0	0	0	0	0	2.50628	0	2.50628	0	0	15.0377
Accession	5	11000-11999	0	2.50628	0	0	0	0	0	0	0	0	0	5.01257
ERX385575	6	10000-10999	0	0	0	0	0	0	0	0	0	0	22.5565
Total Reads	7	9000-9999	0	0	0	2.50628	0	0	0	0	0	17.544
654553	8	8000-8999	0	0	0	0	0	0	0	2.50628	25.0628
Total Bases	9	7000-7999	0	0	0	0	0	0	0	25.0628
66109853	10	6000-6999	0	0	0	0	0	0	20.0503
Genome Size	11	5000-5999	0	0	0	0	2.50628	52.6319
16569	12	4000-4999	0	0	0	0	42.6068
Multiplier	13	3000-3999	0	5.01257	0	22.5565
2.50628	14	2000-2999	0	0	22.5565
	15	1000-1999	0	27.5691
		0-999	17.544

## Sheet: Supp. Table S9
Rearrangement junctions per position per 10000 mitochondrion genomes in human liver
Organism	Color Scale	Genome Positions	0-999	1000-1999	2000-2999	3000-3999	4000-4999	5000-5999	6000-6999	7000-7999	8000-8999	9000-9999	10000-10999	11000-11999	12000-12999	13000-13999	14000-14999	15000-15999	16000-16999
Human	0	16000-16999	0	0	3.57123	0	0	0	0	0	0	0	0	0	0	0	0	0	0
Genome	1	15000-15999	0	0	0	0	0	0	0	0	0	0	0	0	0	0	0	7.14246
Mitochondrion	2	14000-14999	0	0	0	0	0	3.57123	0	0	0	0	3.57123	0	0	0	7.14246
Tissue	3	13000-13999	0	0	0	0	0	0	0	0	0	0	0	0	0	3.57123
Liver	4	12000-12999	0	0	0	0	0	0	0	0	0	0	0	0	0
Accession	5	11000-11999	0	0	0	0	0	0	0	0	0	3.57123	0	0
ERX385576	6	10000-10999	0	0	0	0	0	0	0	0	0	0	7.14246
Total Reads	7	9000-9999	0	3.57123	0	0	0	0	0	0	0	3.57123
459364	8	8000-8999	0	0	0	0	0	0	0	0	3.57123
Total Bases	9	7000-7999	0	0	0	0	0	0	0	14.2849
46395764	10	6000-6999	0	0	0	0	0	0	7.14246
Genome Size	11	5000-5999	0	0	0	0	0	7.14246
16569	12	4000-4999	0	0	0	0	0
Multiplier	13	3000-3999	0	0	0	0
3.57123	14	2000-2999	0	0	10.7137
	15	1000-1999	0	14.2849
		0-999	7.14246

## Sheet: Supp. Table S10
Rearrangement junctions per position per 10000 mitochondrion genomes in human liver
Organism	Color Scale	Genome Positions	0-999	1000-1999	2000-2999	3000-3999	4000-4999	5000-5999	6000-6999	7000-7999	8000-8999	9000-9999	10000-10999	11000-11999	12000-12999	13000-13999	14000-14999	15000-15999	16000-16999
Human	0	16000-16999	3.20372	0	0	0	0	0	0	0	0	0	0	0	0	0	0	0	0
Genome	1	15000-15999	0	0	0	0	0	0	0	0	0	0	0	0	0	0	0	3.20372
Mitochondrion	2	14000-14999	0	0	0	0	3.20372	0	0	0	0	0	0	0	3.20372	0	0
Tissue	3	13000-13999	0	0	0	3.20372	0	0	0	0	0	0	0	0	3.20372	3.20372
Liver	4	12000-12999	0	0	0	0	3.20372	0	0	0	0	3.20372	6.40745	0	3.20372
Accession	5	11000-11999	0	0	0	0	0	0	0	0	3.20372	0	0	3.20372
ERX385577	6	10000-10999	0	0	0	0	0	0	0	0	3.20372	0	6.40745
Total Reads	7	9000-9999	0	3.20372	0	0	0	0	0	0	0	3.20372
512059	8	8000-8999	0	0	0	0	0	0	0	0	0
Total Bases	9	7000-7999	0	3.20372	0	0	0	0	0	12.8149
51717959	10	6000-6999	0	0	0	0	0	0	6.40745
Genome Size	11	5000-5999	0	0	0	0	0	12.8149
16569	12	4000-4999	0	0	0	0	3.20372
Multiplier	13	3000-3999	0	0	0	6.40745
3.20372	14	2000-2999	0	0	3.20372
	15	1000-1999	0	6.40745
		0-999	0

## Sheet: Supp. Table S11
Rearrangement junctions per position per 10000 mitochondrion genomes in human liver
Organism	Color Scale	Genome Positions	0-999	1000-1999	2000-2999	3000-3999	4000-4999	5000-5999	6000-6999	7000-7999	8000-8999	9000-9999	10000-10999	11000-11999	12000-12999	13000-13999	14000-14999	15000-15999	16000-16999
Human	0	16000-16999	0	0	0	0	0	0	0	0	0	0	0	0	0	0	0	0	0
Genome	1	15000-15999	0	0	0	0	0	3.45319	0	0	0	0	0	0	0	0	0	20.7192
Mitochondrion	2	14000-14999	0	0	0	0	0	0	0	0	0	0	0	0	0	3.45319	13.8128
Tissue	3	13000-13999	0	0	0	0	0	0	0	0	0	0	0	0	3.45319	13.8128
Liver	4	12000-12999	0	0	0	3.45319	0	0	0	0	0	0	0	3.45319	6.90639
Accession	5	11000-11999	0	0	0	0	0	0	0	0	0	0	0	10.3596
ERX385578	6	10000-10999	0	0	0	0	0	0	0	0	0	3.45319	0
Total Reads	7	9000-9999	0	0	0	0	3.45319	0	0	0	0	6.90639
475066	8	8000-8999	0	0	0	0	0	0	0	0	20.7192
Total Bases	9	7000-7999	0	0	0	0	0	0	0	27.6256
47981666	10	6000-6999	0	0	0	0	0	0	31.0787
Genome Size	11	5000-5999	0	0	0	0	3.45319	51.7979
16569	12	4000-4999	0	0	0	0	3.45319
Multiplier	13	3000-3999	0	0	0	6.90639
3.45319	14	2000-2999	0	0	13.8128
	15	1000-1999	0	6.90639
		0-999	17.266

## Sheet: Supp. Table S12
Rearrangement junctions per position per 10000 mitochondrion genomes in human liver
Organism	Color Scale	Genome Positions	0-999	1000-1999	2000-2999	3000-3999	4000-4999	5000-5999	6000-6999	7000-7999	8000-8999	9000-9999	10000-10999	11000-11999	12000-12999	13000-13999	14000-14999	15000-15999	16000-16999
Human	0	16000-16999	0	0	3.4762	0	0	0	0	3.4762	0	0	0	0	0	0	0	0	6.9524
Genome	1	15000-15999	0	0	0	0	0	3.4762	0	0	0	0	0	0	0	0	0	10.4286
Mitochondrion	2	14000-14999	0	0	0	0	0	0	0	0	0	0	0	0	0	0	17.381
Tissue	3	13000-13999	0	0	0	0	0	0	0	0	0	0	0	0	0	17.381
Liver	4	12000-12999	0	0	0	0	3.4762	0	0	0	0	0	0	0	10.4286
Accession	5	11000-11999	0	0	0	0	0	0	0	0	0	0	0	10.4286
ERX385579	6	10000-10999	0	0	0	0	0	0	0	0	0	0	6.9524
Total Reads	7	9000-9999	0	0	0	0	0	0	0	0	0	0
471922	8	8000-8999	0	0	0	0	0	0	0	0	13.9048
Total Bases	9	7000-7999	0	0	0	0	0	0	6.9524	20.8572
47664122	10	6000-6999	0	0	0	0	0	0	17.381
Genome Size	11	5000-5999	0	3.4762	0	0	0	73.0002
16569	12	4000-4999	0	0	0	3.4762	17.381
Multiplier	13	3000-3999	0	0	0	0
3.4762	14	2000-2999	0	3.4762	3.4762
	15	1000-1999	0	27.8096
		0-999	17.381
