# Supplementary material for: Organelle DNA rearrangement mapping reveals U-turn-like inversions as a major source of genomic instability in Arabidopsis and humans
Source: HighWire-hosted journal article supplement (doi:10.1101/gr.188573.114), 2015-03-23
Supplement: SuppTablesS13-16.xlsx [file SuppTablesS13-16.xlsx]

## Sheet: Supp. Table S13
Rearrangement junctions per position per 100 genomes in E. coli
Organism		Genome Positions	0-99999	100000-199999	200000-299999	300000-399999	400000-499999	500000-599999	600000-699999	700000-799999	800000-899999	900000-999999	1000000-1099999	1100000-1199999	1200000-1299999	1300000-1399999	1400000-1499999	1500000-1599999	1600000-1699999	1700000-1799999	1800000-1899999	1900000-1999999	2000000-2099999	2100000-2199999	2200000-2299999	2300000-2399999	2400000-2499999	2500000-2599999	2600000-2699999	2700000-2799999	2800000-2899999	2900000-2999999	3000000-3099999	3100000-3199999	3200000-3299999	3300000-3399999	3400000-3499999	3500000-3599999	3600000-3699999	3700000-3799999	3800000-3899999	3900000-3999999	4000000-4099999	4100000-4199999	4200000-4299999	4300000-4399999	4400000-4499999	4500000-4599999	4600000-4639675
E.coli		4600000-4639675	0	0	0	0	0	0	0	0	0	1.97815	0	0	1.97815	0	1.97815	1.97815	0	1.97815	0	0	0	0	0	0	0	0	0	0	0	0	0	0	1.97815	0	0	0	0	0	0	0	0	0	0	0	1.97815	1.97815	3.9563
Strain		4500000-4599999	1.97815	0	1.97815	0	0	0	1.97815	0	1.97815	0	0	3.9563	0	1.97815	1.97815	0	5.93444	1.97815	1.97815	0	1.97815	1.97815	0	0	0	0	3.9563	0	0	1.97815	3.9563	1.97815	1.97815	0	1.97815	0	0	1.97815	3.9563	0	1.97815	0	1.97815	0	1.97815	13.847
K12 MG1655 PFM2		4400000-4499999	5.93444	0	1.97815	0	0	1.97815	0	1.97815	0	1.97815	0	0	3.9563	7.91259	0	1.97815	1.97815	0	0	0	0	0	1.97815	0	3.9563	0	0	1.97815	0	0	0	1.97815	3.9563	0	5.93444	1.97815	0	0	0	1.97815	1.97815	1.97815	0	1.97815	1.97815
Mutations		4300000-4399999	0	0	0	0	0	1.97815	0	3.9563	1.97815	0	1.97815	0	0	1.97815	1.97815	0	0	0	0	0	0	1.97815	0	0	0	0	0	1.97815	1.97815	1.97815	1.97815	0	1.97815	1.97815	0	0	1.97815	0	0	0	1.97815	0	0	0
WT		4200000-4299999	0	0	0	3.9563	1.97815	1.97815	0	0	0	1.97815	5.93444	0	0	0	1.97815	0	0	0	0	1.97815	5.93444	1.97815	1.97815	0	0	0	0	1.97815	0	0	0	0	3.9563	0	1.97815	0	0	0	1.97815	0	0	1.97815	0
Sample		4100000-4199999	1.97815	0	0	0	0	0	0	0	0	0	0	0	0	0	3.9563	0	0	1.97815	0	0	0	1.97815	1.97815	0	0	1.97815	1.97815	0	0	0	0	0	3.9563	0	0	1.97815	1.97815	0	0	0	0	3.9563
1		4000000-4099999	1.97815	1.97815	0	0	1.97815	1.97815	1.97815	0	1.97815	1.97815	0	0	1.97815	0	1.97815	3.9563	0	0	0	0	0	0	0	0	0	1.97815	0	0	0	1.97815	0	0	0	3.9563	0	0	1.97815	3.9563	1.97815	1.97815	0
Total Reads		3900000-3999999	0	0	0	0	1.97815	0	0	3.9563	0	0	1.97815	0	0	1.97815	3.9563	1.97815	0	0	1.97815	0	0	0	0	3.9563	1.97815	1.97815	0	1.97815	0	0	0	0	0	3.9563	3.9563	0	0	0	1.97815	0
2607182		3800000-3899999	0	1.97815	0	0	0	0	0	0	0	0	0	0	3.9563	0	0	0	0	0	1.97815	0	1.97815	0	1.97815	0	0	0	0	1.97815	0	0	0	0	0	1.97815	1.97815	0	0	0	0
Total Bases		3700000-3799999	0	0	1.97815	0	1.97815	1.97815	0	0	0	0	0	1.97815	0	0	0	0	0	0	0	0	3.9563	0	0	0	0	0	1.97815	1.97815	0	0	0	0	0	114.733	3.9563	0	3.9563	1.97815
234646380		3600000-3699999	0	0	3.9563	0	3.9563	0	0	5.93444	0	5.93444	1.97815	0	1.97815	1.97815	0	0	0	0	0	0	0	1.97815	1.97815	0	1.97815	0	0	0	0	3.9563	0	3.9563	0	0	0	1.97815	0
Genome Size		3500000-3599999	1.97815	0	0	1.97815	1.97815	0	0	1.97815	0	1.97815	3.9563	0	0	1.97815	0	1.97815	0	0	0	0	0	0	1.97815	1.97815	1.97815	0	1.97815	3.9563	0	0	0	0	1.97815	1.97815	3.9563	0
4639675		3400000-3499999	0	1.97815	1.97815	3.9563	3.9563	0	0	3.9563	0	3.9563	0	0	0	0	1.97815	0	0	0	0	3.9563	3.9563	1.97815	0	0	0	1.97815	0	0	0	0	1.97815	0	1.97815	1.97815	1.97815
Multiplier		3300000-3399999	0	0	0	0	1.97815	0	1.97815	1.97815	0	0	0	1.97815	0	1.97815	1.97815	3.9563	1.97815	0	3.9563	0	1.97815	0	0	1.97815	0	0	0	5.93444	0	0	0	3.9563	0	1.97815
1.97731		3200000-3299999	0	1.97815	0	0	0	0	0	0	1.97815	0	1.97815	3.9563	0	5.93444	0	0	3.9563	0	0	1.97815	1.97815	1.97815	0	0	1.97815	1.97815	0	1.97815	3.9563	0	1.97815	1.97815	3.9563
		3100000-3199999	0	0	1.97815	1.97815	0	1.97815	1.97815	0	0	1.97815	0	0	1.97815	0	0	0	1.97815	3.9563	0	1.97815	0	1.97815	0	0	1.97815	1.97815	1.97815	0	1.97815	5.93444	5.93444	1.97815
Color Scale		3000000-3099999	1.97815	0	0	0	1.97815	0	0	0	1.97815	1.97815	0	0	0	0	1.97815	0	1.97815	1.97815	0	0	1.97815	0	1.97815	0	0	3.9563	0	0	0	1.97815	1.97815
0		2900000-2999999	1.97815	3.9563	0	1.97815	0	3.9563	0	0	5.93444	0	1.97815	0	3.9563	0	1.97815	0	0	3.9563	1.97815	1.97815	0	3.9563	0	0	0	1.97815	0	0	0	3.9563
1		2800000-2899999	0	0	0	0	0	5.93444	0	1.97815	0	0	0	0	3.9563	0	0	0	3.9563	1.97815	0	0	0	1.97815	1.97815	1.97815	0	1.97815	0	0	1.97815
2		2700000-2799999	1.97815	0	0	0	0	0	1.97815	0	0	0	0	0	0	5.93444	0	0	0	0	0	0	0	0	0	0	0	0	1.97815	3.9563
3		2600000-2699999	0	0	0	7.91259	0	0	0	3.9563	0	0	1.97815	0	0	0	3.9563	0	0	3.9563	0	0	1.97815	0	1.97815	0	1.97815	0	3.9563
4		2500000-2599999	1.97815	0	0	0	0	0	3.9563	1.97815	0	1.97815	0	1.97815	0	1.97815	0	0	0	1.97815	9.89074	0	0	0	0	0	0	3.9563
5		2400000-2499999	0	1.97815	0	1.97815	0	0	1.97815	1.97815	1.97815	0	1.97815	0	0	1.97815	1.97815	1.97815	0	0	1.97815	0	1.97815	0	1.97815	0	0
6		2300000-2399999	0	0	0	0	0	1.97815	0	1.97815	1.97815	1.97815	0	0	0	1.97815	0	0	0	0	0	0	0	0	0	1.97815
7		2200000-2299999	0	0	1.97815	1.97815	1.97815	1.97815	1.97815	0	1.97815	0	0	0	1.97815	1.97815	3.9563	0	0	0	0	0	0	1.97815	0
8		2100000-2199999	0	0	0	1.97815	0	1.97815	0	0	0	0	1.97815	0	1.97815	3.9563	1.97815	0	1.97815	0	1.97815	0	3.9563	5.93444
9		2000000-2099999	0	3.9563	0	0	1.97815	1.97815	0	0	0	0	1.97815	0	1.97815	0	0	0	0	1.97815	0	1.97815	0
10		1900000-1999999	0	0	0	1.97815	0	0	1.97815	1.97815	1.97815	0	0	1.97815	3.9563	0	1.97815	0	1.97815	1.97815	0	94.9511
11		1800000-1899999	0	0	0	0	1.97815	1.97815	1.97815	3.9563	0	1.97815	0	0	0	1.97815	1.97815	0	0	0	1.97815
12		1700000-1799999	0	3.9563	0	0	0	0	0	1.97815	0	0	1.97815	3.9563	0	0	0	0	0	3.9563
13		1600000-1699999	0	0	0	0	0	1.97815	0	0	0	1.97815	1.97815	1.97815	0	0	0	3.9563	3.9563
14		1500000-1599999	1.97815	0	0	0	0	0	0	1.97815	0	0	0	1.97815	1.97815	1.97815	0	15.8252
15		1400000-1499999	3.9563	1.97815	1.97815	1.97815	1.97815	0	0	0	0	0	0	0	0	0	0
		1300000-1399999	1.97815	1.97815	3.9563	1.97815	0	1.97815	3.9563	0	0	0	0	1.97815	0	0
		1200000-1299999	0	0	0	5.93444	0	0	1.97815	1.97815	0	1.97815	0	1.97815	25.7159
		1100000-1199999	0	0	1.97815	0	1.97815	3.9563	0	0	0	0	0	0
		1000000-1099999	3.9563	0	0	0	0	0	0	0	0	0	3.9563
		900000-999999	0	0	0	0	0	3.9563	0	0	1.97815	3.9563
		800000-899999	0	0	0	0	0	0	0	0	1.97815
		700000-799999	1.97815	1.97815	0	0	1.97815	0	1.97815	0
		600000-699999	0	3.9563	0	0	1.97815	0	1.97815
		500000-599999	1.97815	1.97815	0	1.97815	1.97815	1.97815
		400000-499999	1.97815	0	0	1.97815	3.9563
		300000-399999	1.97815	0	3.9563	7.91259
		200000-299999	0	0	3.9563
		100000-199999	0	3.9563
		0-99999	0

## Sheet: Supp. Table S14
Rearrangement junctions per position per 100 genomes in E. coli
Organism		Genome Positions	0-99999	100000-199999	200000-299999	300000-399999	400000-499999	500000-599999	600000-699999	700000-799999	800000-899999	900000-999999	1000000-1099999	1100000-1199999	1200000-1299999	1300000-1399999	1400000-1499999	1500000-1599999	1600000-1699999	1700000-1799999	1800000-1899999	1900000-1999999	2000000-2099999	2100000-2199999	2200000-2299999	2300000-2399999	2400000-2499999	2500000-2599999	2600000-2699999	2700000-2799999	2800000-2899999	2900000-2999999	3000000-3099999	3100000-3199999	3200000-3299999	3300000-3399999	3400000-3499999	3500000-3599999	3600000-3699999	3700000-3799999	3800000-3899999	3900000-3999999	4000000-4099999	4100000-4199999	4200000-4299999	4300000-4399999	4400000-4499999	4500000-4599999	4600000-4639675
E.coli		4600000-4639675	0	0	0	0	0	0.959083	0.959083	0	0	0	0	0	0	0	0	0.959083	0	0	0.959083	0	0	0	0	0	0	0	0	0	0	0	0	0	0	0	0	0	0	0	1.91817	0	0.959083	0	0	0.959083	0	0.959083	0
Strain		4500000-4599999	0	0.959083	0	0	0	0	0	0	1.91817	0	0	0.959083	0	0	0.959083	0.959083	0	0.959083	0	0	0	0.959083	0	0	0.959083	0.959083	0	0	0	0.959083	1.91817	0	0	0	0	0	0.959083	0	0.959083	0	0.959083	0	0.959083	0	0	33.5679
K12 MG1655 PFM2		4400000-4499999	1.91817	0	0	0.959083	0.959083	0	0	0.959083	0	0	0	0	0	0.959083	0.959083	0	1.91817	0.959083	0.959083	0	0	0	0	0	1.91817	0	1.91817	0	0.959083	0	0	0.959083	0	0	0.959083	0	0.959083	0	0	0	1.91817	0.959083	1.91817	0	0
Mutations		4300000-4399999	0	0	0	2.87725	0	1.91817	1.91817	0	0	0.959083	0	0	0	0	0	0.959083	0.959083	0.959083	1.91817	0.959083	1.91817	0.959083	0.959083	0.959083	0	0.959083	0.959083	0	0	1.91817	0.959083	0	1.91817	0	0	0	0.959083	0	0.959083	0.959083	0.959083	0	0	3.83633
WT		4200000-4299999	0	0	0	0	0.959083	0	0	0.959083	1.91817	0	0	0	0	0	0	0	0	0.959083	0	0	1.91817	0	1.91817	0	0	0	0	0.959083	0	0.959083	0	0	0.959083	0	0.959083	0	0	0	1.91817	0.959083	0	0.959083	0
Sample		4100000-4199999	0.959083	0.959083	0.959083	0	0	0	0	0	0	0	0.959083	0	0	0	0	0	0	0	0	0.959083	0	0.959083	0	2.87725	0	0	0	0.959083	0.959083	0	0.959083	0.959083	0	0	0	0	0	0	0	0	0	0
2		4000000-4099999	0	0	0	0	0.959083	0.959083	0	0	0	0	0	0	0	0	0	0.959083	0	0.959083	0.959083	0	0	0.959083	1.91817	0	0	0	0.959083	0	0	0	0	0	0.959083	0	3.83633	0.959083	0	0	0	0.959083	0.959083
Total Reads		3900000-3999999	1.91817	1.91817	0	0	0	0	1.91817	0.959083	0.959083	0	0.959083	0	0	0.959083	0.959083	0.959083	1.91817	0.959083	0	0	0.959083	0.959083	0	0	1.91817	0	0	0.959083	0	0.959083	0.959083	0.959083	0	1.91817	0	0	0.959083	1.91817	0	0
2606657		3800000-3899999	0	0	0	0.959083	0	0.959083	0	0.959083	0	0.959083	0	0	0.959083	0.959083	0.959083	0.959083	0	0	0	0	0	0.959083	0	0.959083	0	1.91817	0	0	0	0	0	0.959083	0	0.959083	0.959083	0.959083	0	0	1.91817
Total Bases		3700000-3799999	0	0	0	0	0	0.959083	1.91817	0	0.959083	0	0	0	0	0.959083	0.959083	0	0	0.959083	0	0.959083	0.959083	1.91817	0	0	1.91817	0	0	0	0	0	2.87725	0	0	54.6677	0.959083	0	0.959083	0.959083
234599130		3600000-3699999	0	0	0.959083	0	0	0	2.87725	0	0	0	0	0	0	0	0	1.91817	0	0.959083	0.959083	0	0	0.959083	0	0.959083	0.959083	1.91817	0.959083	0	0.959083	0	0	0	0	0	0.959083	0.959083	0.959083
Genome Size		3500000-3599999	0	0	0	1.91817	0.959083	0	0	0.959083	0.959083	0	0	0	0	0	0	0.959083	0	0	0.959083	0	0.959083	0	0.959083	0	0	1.91817	0	0.959083	0	0	0	0	0	0	0.959083	0
4639675		3400000-3499999	0.959083	1.91817	0	0	0	0	0	0	0	0	1.91817	0.959083	0.959083	2.87725	0.959083	0	0	0	0.959083	0.959083	0	0	0	0	0	0	0	0	0.959083	0	0	0	0.959083	0	0
Multiplier		3300000-3399999	0.959083	0.959083	0	0.959083	1.91817	0	0	0	0	0.959083	0.959083	0	0	0.959083	0	0	0.959083	0	0	0.959083	0	0	0.959083	0.959083	0.959083	0	0.959083	0	0	0	0	0	0	0
1.9777		3200000-3299999	0	0	0	0	0	0	0	0	0	0.959083	0	0	0.959083	0.959083	1.91817	0	0	0	0	1.91817	1.91817	0.959083	0.959083	0	0	0.959083	0	0	0	0.959083	0.959083	0.959083	0.959083
		3100000-3199999	0.959083	0	0	0	0	0.959083	1.91817	0	1.91817	0	0	1.91817	0	0.959083	0	0	0.959083	0.959083	0.959083	0	0	0	0	0	0.959083	0.959083	0.959083	1.91817	2.87725	0.959083	2.87725	2.87725
Color Scale		3000000-3099999	0	1.91817	0	1.91817	2.87725	0	0.959083	0	0	0	0	0	0.959083	0.959083	0.959083	0	0	0	0	0	0	0	0	0.959083	0.959083	0	0	0	0.959083	0.959083	0.959083
0		2900000-2999999	0	0	0	0.959083	0.959083	0	1.91817	0	0	0	0	0.959083	1.91817	1.91817	0	0.959083	0	0	0	1.91817	0.959083	0.959083	0	0	0	0	0.959083	0	0	0
1		2800000-2899999	0.959083	0.959083	0.959083	1.91817	0	0	0	0.959083	0	0	0	0.959083	0.959083	0.959083	0	1.91817	0	0	0.959083	0	0	0	0	0	0	0	1.91817	0.959083	1.91817
2		2700000-2799999	0	0	0	0.959083	0	0	0.959083	0	0	0	0	0	0	0	0	0.959083	0.959083	0	0.959083	0	0.959083	0	0	0	0.959083	0.959083	0	0.959083
3		2600000-2699999	0.959083	0	0	0	0	0	0.959083	0.959083	0.959083	0	0.959083	0	0	0	0	0	0	0	0	0	0.959083	0	0.959083	0.959083	0.959083	0.959083	0
4		2500000-2599999	0	0	0	0	0.959083	0.959083	0	0	0	0.959083	2.87725	0.959083	0	0	0	0.959083	0	0.959083	3.83633	0	0	0	1.91817	0.959083	0	0.959083
5		2400000-2499999	0	0	0	0.959083	0.959083	0	0	0	0	0.959083	0.959083	0.959083	0.959083	0	0	0.959083	0	0	0	0.959083	0	0	0	0.959083	2.87725
6		2300000-2399999	0	0.959083	0	0	0.959083	0.959083	0	0	0	0	0	0	1.91817	0	0	0.959083	0.959083	0.959083	0.959083	0	0.959083	0	0	0.959083
7		2200000-2299999	0	0.959083	0	1.91817	1.91817	0	0.959083	0	1.91817	0.959083	0	0	1.91817	0	0.959083	0.959083	0	0	0	0	1.91817	0.959083	0.959083
8		2100000-2199999	0	0	0.959083	0	0.959083	0	0.959083	0.959083	0.959083	0.959083	0.959083	0.959083	0	0	0	0	0	0.959083	0.959083	0	0	2.87725
9		2000000-2099999	0	0	0.959083	0.959083	0.959083	0	0	0.959083	0.959083	0	0	0	0	0.959083	0.959083	0.959083	0	0	0.959083	1.91817	0
10		1900000-1999999	0	0	0	0.959083	0	0	0	0	0	0	0.959083	0	0	0	0	0	0.959083	0	0	45.0769
11		1800000-1899999	0.959083	0	0	0	0.959083	0	0.959083	0.959083	0	0	0	0.959083	0	0	1.91817	0.959083	0.959083	1.91817	0
12		1700000-1799999	0	0	0	1.91817	0.959083	0	0	1.91817	0	0	0.959083	0	0	0.959083	1.91817	0	0.959083	0.959083
13		1600000-1699999	0	0	0	0	0	0	0.959083	0.959083	0	0	0	0	0.959083	0	0.959083	0	0.959083
14		1500000-1599999	1.91817	0	0	0	0.959083	0.959083	0.959083	0	0	0	0	0.959083	0	0	0	48.9132
15		1400000-1499999	0	0.959083	0	0.959083	0.959083	0	1.91817	0.959083	0.959083	0	0	0	0	0.959083	2.87725
		1300000-1399999	0.959083	0.959083	0	0	0.959083	0.959083	0	0	0	0	0	0.959083	1.91817	0
		1200000-1299999	0.959083	0.959083	0	0	0	0.959083	0.959083	0	0	0	1.91817	0	46.9951
		1100000-1199999	1.91817	0.959083	0.959083	0.959083	0	0.959083	0	0.959083	0	0.959083	0	0
		1000000-1099999	0	0	0	1.91817	0.959083	0.959083	0	0.959083	0	0	0.959083
		900000-999999	0	0	0.959083	0	0	0	0	0.959083	0	0
		800000-899999	0.959083	0	0.959083	1.91817	0	0.959083	0	0.959083	0.959083
		700000-799999	0	0	0	0	0	0.959083	0	2.87725
		600000-699999	0	0	0.959083	0.959083	0.959083	0	1.91817
		500000-599999	0	0	0	0	0.959083	0.959083
		400000-499999	0	0.959083	0	0.959083	0.959083
		300000-399999	0	0	0	0.959083
		200000-299999	1.91817	0	0
		100000-199999	0.959083	2.87725
		0-99999	0.959083

## Sheet: Supp. Table S15
Rearrangement junctions per position per 100 genomes in E. coli
Organism		Genome Positions	0-99999	100000-199999	200000-299999	300000-399999	400000-499999	500000-599999	600000-699999	700000-799999	800000-899999	900000-999999	1000000-1099999	1100000-1199999	1200000-1299999	1300000-1399999	1400000-1499999	1500000-1599999	1600000-1699999	1700000-1799999	1800000-1899999	1900000-1999999	2000000-2099999	2100000-2199999	2200000-2299999	2300000-2399999	2400000-2499999	2500000-2599999	2600000-2699999	2700000-2799999	2800000-2899999	2900000-2999999	3000000-3099999	3100000-3199999	3200000-3299999	3300000-3399999	3400000-3499999	3500000-3599999	3600000-3699999	3700000-3799999	3800000-3899999	3900000-3999999	4000000-4099999	4100000-4199999	4200000-4299999	4300000-4399999	4400000-4499999	4500000-4599999	4600000-4639675
E.coli		4600000-4639675	1.97815	0	0	0	0	0	0	0	0	0	0	0	0	0	0	0	0	0	0	0	0	0	0	0	1.97815	0	0	0	0	0	0	0	0	0	0	1.97815	0	0	1.97815	0	1.97815	1.97815	1.97815	0	1.97815	1.97815	3.9563
Strain		4500000-4599999	1.97815	0	0	1.97815	0	1.97815	0	0	0	0	1.97815	0	3.9563	0	0	0	0	0	0	0	0	1.97815	1.97815	1.97815	0	0	0	0	0	0	1.97815	0	0	0	0	0	0	1.97815	1.97815	0	0	0	1.97815	0	0	23.7378
K12 MG1655 PFM2		4400000-4499999	0	0	0	0	0	1.97815	0	0	0	1.97815	1.97815	1.97815	0	1.97815	5.93445	0	1.97815	0	0	0	0	0	1.97815	0	0	3.9563	0	0	0	0	1.97815	0	1.97815	0	0	0	0	0	1.97815	3.9563	1.97815	1.97815	0	0	1.97815
Mutations		4300000-4399999	0	1.97815	0	0	1.97815	1.97815	0	0	0	0	1.97815	0	0	0	3.9563	0	0	1.97815	0	0	0	0	0	0	1.97815	0	0	1.97815	0	1.97815	3.9563	0	0	0	0	0	0	1.97815	0	0	1.97815	0	0	5.93445
WT		4200000-4299999	0	0	0	1.97815	1.97815	0	0	1.97815	0	0	0	0	0	0	0	0	1.97815	0	1.97815	0	1.97815	0	1.97815	0	0	0	0	0	1.97815	0	0	0	0	0	1.97815	0	0	0	0	0	0	0	3.9563
Sample		4100000-4199999	0	0	0	0	1.97815	0	0	0	0	1.97815	0	0	1.97815	0	0	0	0	0	0	0	0	0	1.97815	0	1.97815	0	0	0	0	0	0	3.9563	0	0	1.97815	1.97815	0	0	1.97815	0	0	3.9563
3		4000000-4099999	0	1.97815	0	1.97815	0	0	0	0	0	0	0	1.97815	0	1.97815	0	1.97815	0	0	0	0	0	0	0	1.97815	1.97815	0	0	0	0	1.97815	1.97815	0	1.97815	1.97815	0	1.97815	1.97815	0	0	0	3.9563
Total Reads		3900000-3999999	0	0	0	0	0	3.9563	0	0	0	0	3.9563	0	0	0	1.97815	0	0	1.97815	0	0	0	0	0	0	0	1.97815	0	0	0	3.9563	0	0	1.97815	1.97815	0	0	1.97815	0	0	0
2607181		3800000-3899999	0	0	0	0	1.97815	0	0	0	0	1.97815	0	0	0	0	0	0	1.97815	1.97815	0	0	0	0	1.97815	0	0	1.97815	0	1.97815	0	0	1.97815	0	0	5.93445	0	1.97815	0	0	5.93445
Total Bases		3700000-3799999	1.97815	0	0	0	0	1.97815	0	0	0	0	0	0	0	0	0	0	0	1.97815	0	1.97815	3.9563	0	0	0	0	0	1.97815	0	1.97815	0	1.97815	0	1.97815	138.47	0	1.97815	0	5.93445
234646290		3600000-3699999	0	0	1.97815	0	0	0	0	0	0	0	1.97815	0	0	0	0	0	0	0	0	0	0	0	0	0	3.9563	0	1.97815	0	5.93445	0	0	1.97815	1.97815	0	0	0	1.97815
Genome Size		3500000-3599999	0	0	0	0	0	0	0	5.93445	0	0	0	1.97815	0	0	1.97815	0	1.97815	0	1.97815	0	0	0	0	0	0	0	0	0	0	0	1.97815	0	1.97815	3.9563	1.97815	1.97815
4639675		3400000-3499999	1.97815	0	0	1.97815	1.97815	0	0	0	3.9563	1.97815	0	0	0	1.97815	1.97815	0	0	1.97815	0	0	0	0	0	1.97815	0	1.97815	0	0	0	1.97815	1.97815	1.97815	0	0	3.9563
Multiplier		3300000-3399999	0	0	0	0	0	0	0	0	1.97815	0	0	1.97815	0	0	1.97815	0	0	0	1.97815	0	0	1.97815	0	0	0	1.97815	0	0	5.93445	0	0	0	0	1.97815
1.97731		3200000-3299999	0	0	0	0	0	0	0	0	0	0	1.97815	0	1.97815	0	0	3.9563	0	1.97815	1.97815	0	1.97815	0	1.97815	1.97815	0	0	0	0	0	0	1.97815	0	7.91259
		3100000-3199999	0	0	0	0	0	0	0	1.97815	0	1.97815	0	1.97815	0	0	0	0	0	0	0	0	1.97815	0	1.97815	0	1.97815	0	0	0	1.97815	0	0	3.9563
Color Scale		3000000-3099999	0	0	0	3.9563	1.97815	1.97815	1.97815	0	0	0	0	1.97815	0	0	0	0	3.9563	0	0	1.97815	0	0	0	0	0	0	0	3.9563	1.97815	0	3.9563
0		2900000-2999999	0	0	0	0	1.97815	0	0	0	1.97815	0	1.97815	0	1.97815	0	0	0	1.97815	0	1.97815	0	0	0	0	1.97815	0	0	0	3.9563	1.97815	0
1		2800000-2899999	1.97815	0	0	1.97815	0	0	1.97815	1.97815	1.97815	0	0	1.97815	3.9563	1.97815	0	0	1.97815	0	0	0	0	0	0	0	0	0	0	0	0
2		2700000-2799999	0	0	0	1.97815	0	0	0	0	0	0	1.97815	3.9563	0	0	0	0	0	0	0	0	0	0	1.97815	0	3.9563	1.97815	1.97815	1.97815
3		2600000-2699999	0	1.97815	0	0	0	0	1.97815	0	0	0	0	0	0	0	0	0	0	0	0	0	1.97815	0	0	1.97815	0	1.97815	3.9563
4		2500000-2599999	0	0	0	3.9563	0	1.97815	0	0	0	1.97815	0	0	0	0	0	0	0	0	5.93445	0	0	1.97815	0	0	1.97815	1.97815
5		2400000-2499999	3.9563	1.97815	0	0	0	0	5.93445	0	1.97815	0	0	0	0	0	0	1.97815	1.97815	0	0	0	0	0	1.97815	1.97815	5.93445
6		2300000-2399999	0	0	0	1.97815	0	0	0	0	0	0	0	1.97815	0	0	0	1.97815	0	0	0	1.97815	1.97815	0	0	1.97815
7		2200000-2299999	0	0	1.97815	0	1.97815	0	1.97815	0	0	0	0	1.97815	0	0	0	0	0	1.97815	0	0	0	0	1.97815
8		2100000-2199999	1.97815	0	0	0	0	1.97815	3.9563	0	1.97815	0	1.97815	1.97815	1.97815	1.97815	0	0	0	1.97815	0	1.97815	0	0
9		2000000-2099999	0	1.97815	0	0	1.97815	0	0	0	0	0	0	0	0	0	1.97815	0	0	0	0	1.97815	3.9563
10		1900000-1999999	3.9563	0	0	1.97815	0	0	0	0	0	0	3.9563	0	0	0	1.97815	0	0	1.97815	1.97815	134.514
11		1800000-1899999	3.9563	1.97815	0	0	3.9563	1.97815	3.9563	1.97815	1.97815	0	3.9563	0	0	0	1.97815	1.97815	0	0	3.9563
12		1700000-1799999	1.97815	0	0	0	1.97815	0	0	0	3.9563	0	1.97815	0	1.97815	0	1.97815	1.97815	0	0
13		1600000-1699999	0	0	1.97815	1.97815	0	0	1.97815	1.97815	1.97815	0	1.97815	1.97815	1.97815	0	0	0	0
14		1500000-1599999	0	0	0	0	3.9563	0	0	0	0	0	0	1.97815	0	0	0	1.97815
15		1400000-1499999	3.9563	1.97815	0	1.97815	0	0	0	0	0	0	0	1.97815	0	1.97815	0
		1300000-1399999	0	0	0	0	0	0	1.97815	0	0	0	0	0	0	3.9563
		1200000-1299999	0	1.97815	0	0	0	0	1.97815	1.97815	0	0	0	0	51.4319
		1100000-1199999	0	3.9563	0	0	0	1.97815	0	1.97815	0	0	0	5.93445
		1000000-1099999	0	0	0	0	1.97815	0	0	3.9563	0	1.97815	5.93445
		900000-999999	0	0	0	0	0	0	0	0	1.97815	5.93445
		800000-899999	1.97815	0	0	0	0	1.97815	1.97815	1.97815	1.97815
		700000-799999	0	0	0	0	0	0	1.97815	3.9563
		600000-699999	0	0	0	0	3.9563	0	1.97815
		500000-599999	1.97815	0	0	0	0	1.97815
		400000-499999	0	0	0	0	0
		300000-399999	0	0	0	1.97815
		200000-299999	0	0	1.97815
		100000-199999	0	5.93445
		0-99999	1.97815

## Sheet: Supp. Table S16
Rearrangement junctions per position per 100 genomes in E. coli
Organism		Genome Positions	0-99999	100000-199999	200000-299999	300000-399999	400000-499999	500000-599999	600000-699999	700000-799999	800000-899999	900000-999999	1000000-1099999	1100000-1199999	1200000-1299999	1300000-1399999	1400000-1499999	1500000-1599999	1600000-1699999	1700000-1799999	1800000-1899999	1900000-1999999	2000000-2099999	2100000-2199999	2200000-2299999	2300000-2399999	2400000-2499999	2500000-2599999	2600000-2699999	2700000-2799999	2800000-2899999	2900000-2999999	3000000-3099999	3100000-3199999	3200000-3299999	3300000-3399999	3400000-3499999	3500000-3599999	3600000-3699999	3700000-3799999	3800000-3899999	3900000-3999999	4000000-4099999	4100000-4199999	4200000-4299999	4300000-4399999	4400000-4499999	4500000-4599999	4600000-4639675
E.coli		4600000-4639675	0	1.97835	0	0	1.97835	1.97835	0	1.97835	0	1.97835	0	0	0	1.97835	0	0	0	0	0	0	0	0	0	0	0	0	0	1.97835	1.97835	0	0	1.97835	0	0	0	1.97835	1.97835	0	0	0	0	0	0	0	1.97835	1.97835	0
Strain		4500000-4599999	3.95671	0	0	1.97835	3.95671	0	1.97835	1.97835	1.97835	0	0	0	1.97835	1.97835	0	1.97835	0	1.97835	3.95671	0	0	0	0	1.97835	0	0	0	0	1.97835	0	0	0	1.97835	0	0	1.97835	0	3.95671	0	0	1.97835	0	1.97835	0	1.97835	77.1558
K12 MG1655 PFM2		4400000-4499999	0	1.97835	0	0	0	0	3.95671	0	1.97835	1.97835	0	1.97835	1.97835	0	1.97835	1.97835	1.97835	1.97835	0	1.97835	0	0	0	0	0	1.97835	5.93506	0	0	0	0	1.97835	7.91341	1.97835	1.97835	1.97835	3.95671	0	3.95671	1.97835	1.97835	1.97835	0	0	1.97835
Mutations		4300000-4399999	3.95671	1.97835	0	0	0	0	0	0	1.97835	0	0	1.97835	1.97835	0	0	0	0	0	0	0	0	1.97835	3.95671	0	1.97835	0	0	0	0	0	0	5.93506	0	0	0	0	0	0	1.97835	1.97835	1.97835	0	1.97835	1.97835
WT		4200000-4299999	0	0	0	1.97835	0	0	0	1.97835	0	0	0	0	1.97835	0	1.97835	3.95671	1.97835	0	0	3.95671	1.97835	0	1.97835	0	0	3.95671	1.97835	0	1.97835	0	0	0	0	0	0	1.97835	1.97835	0	0	0	0	0	3.95671
Sample		4100000-4199999	0	0	1.97835	1.97835	1.97835	1.97835	0	0	0	0	0	0	0	0	1.97835	7.91341	3.95671	0	0	0	1.97835	0	1.97835	0	0	1.97835	3.95671	0	0	1.97835	0	0	1.97835	0	0	1.97835	0	0	0	5.93506	0	0
4		4000000-4099999	1.97835	3.95671	1.97835	3.95671	0	1.97835	0	1.97835	0	1.97835	1.97835	0	0	5.93506	1.97835	0	0	0	0	1.97835	3.95671	0	1.97835	0	0	1.97835	0	0	1.97835	1.97835	0	3.95671	0	0	0	1.97835	1.97835	5.93506	0	1.97835	1.97835
Total Reads		3900000-3999999	0	0	0	0	3.95671	0	0	0	0	0	1.97835	0	0	1.97835	0	0	0	0	0	1.97835	0	0	3.95671	0	5.93506	0	0	1.97835	0	0	0	1.97835	0	3.95671	0	0	1.97835	0	0	1.97835
2606911		3800000-3899999	0	0	0	0	1.97835	0	0	0	0	0	0	1.97835	1.97835	0	3.95671	0	1.97835	1.97835	3.95671	1.97835	0	0	3.95671	0	1.97835	5.93506	7.91341	0	0	0	1.97835	3.95671	0	1.97835	0	1.97835	1.97835	0	1.97835
Total Bases		3700000-3799999	0	0	1.97835	0	0	0	0	0	0	0	1.97835	0	1.97835	0	1.97835	1.97835	3.95671	0	0	0	1.97835	1.97835	3.95671	0	5.93506	1.97835	0	1.97835	0	3.95671	1.97835	1.97835	3.95671	138.485	0	1.97835	0	1.97835
234621990		3600000-3699999	0	3.95671	0	0	1.97835	0	0	1.97835	0	0	0	0	0	1.97835	1.97835	1.97835	0	0	0	0	0	0	0	0	0	1.97835	0	0	1.97835	1.97835	0	0	0	0	0	0	7.91341
Genome Size		3500000-3599999	1.97835	0	1.97835	3.95671	1.97835	1.97835	3.95671	0	3.95671	1.97835	0	3.95671	0	1.97835	1.97835	0	0	0	0	0	1.97835	1.97835	0	1.97835	1.97835	0	0	3.95671	1.97835	1.97835	0	1.97835	1.97835	1.97835	0	1.97835
4639675		3400000-3499999	1.97835	3.95671	0	0	0	0	0	0	0	0	0	0	0	0	0	0	0	1.97835	3.95671	0	0	1.97835	0	3.95671	0	1.97835	1.97835	1.97835	0	1.97835	3.95671	0	0	0	1.97835
Multiplier		3300000-3399999	0	0	0	3.95671	0	3.95671	1.97835	1.97835	0	0	0	0	0	1.97835	0	0	0	0	1.97835	0	1.97835	0	1.97835	1.97835	0	0	0	0	3.95671	0	1.97835	1.97835	0	7.91341
1.97751		3200000-3299999	1.97835	1.97835	1.97835	1.97835	0	0	1.97835	0	0	1.97835	0	0	0	0	1.97835	0	0	0	1.97835	0	1.97835	1.97835	0	0	1.97835	1.97835	1.97835	0	1.97835	1.97835	1.97835	0	3.95671
		3100000-3199999	0	0	0	0	0	0	3.95671	0	0	1.97835	0	0	1.97835	0	1.97835	0	1.97835	0	0	0	0	1.97835	0	0	0	0	0	1.97835	3.95671	1.97835	3.95671	1.97835
Color Scale		3000000-3099999	1.97835	3.95671	3.95671	0	1.97835	0	1.97835	0	0	1.97835	0	0	0	0	3.95671	0	1.97835	0	0	3.95671	1.97835	0	0	0	0	0	1.97835	0	1.97835	0	0
0		2900000-2999999	1.97835	0	0	1.97835	1.97835	0	0	0	1.97835	0	3.95671	1.97835	0	1.97835	3.95671	0	0	0	0	3.95671	0	1.97835	0	0	0	1.97835	0	0	0	3.95671
1		2800000-2899999	0	0	1.97835	0	0	1.97835	0	0	0	0	0	0	1.97835	0	0	0	0	3.95671	0	1.97835	0	1.97835	0	0	0	1.97835	0	0	1.97835
2		2700000-2799999	1.97835	0	5.93506	1.97835	1.97835	1.97835	0	0	0	1.97835	0	0	0	0	0	1.97835	0	1.97835	1.97835	0	1.97835	0	1.97835	1.97835	1.97835	0	1.97835	1.97835
3		2600000-2699999	0	0	0	0	1.97835	0	0	1.97835	1.97835	0	0	0	0	1.97835	1.97835	0	5.93506	0	1.97835	1.97835	1.97835	1.97835	0	0	0	3.95671	1.97835
4		2500000-2599999	0	1.97835	1.97835	1.97835	1.97835	1.97835	1.97835	0	0	1.97835	0	1.97835	0	0	0	0	0	0	3.95671	0	1.97835	1.97835	0	0	1.97835	0
5		2400000-2499999	0	0	0	0	0	1.97835	1.97835	3.95671	0	0	0	0	1.97835	0	1.97835	0	1.97835	0	1.97835	0	0	1.97835	1.97835	1.97835	0
6		2300000-2399999	0	0	0	0	0	0	3.95671	5.93506	1.97835	0	0	1.97835	1.97835	0	1.97835	0	0	0	1.97835	0	0	1.97835	0	7.91341
7		2200000-2299999	0	0	0	1.97835	1.97835	0	0	0	0	0	0	1.97835	1.97835	1.97835	0	1.97835	0	0	0	0	3.95671	1.97835	5.93506
8		2100000-2199999	0	1.97835	0	3.95671	1.97835	0	3.95671	1.97835	0	0	0	1.97835	0	0	0	0	0	1.97835	0	0	0	1.97835
9		2000000-2099999	0	1.97835	0	0	0	0	0	0	1.97835	0	0	1.97835	0	1.97835	0	0	3.95671	0	0	0	11.8701
10		1900000-1999999	1.97835	0	0	0	0	0	1.97835	0	1.97835	1.97835	0	0	1.97835	0	0	1.97835	5.93506	3.95671	0	116.723
11		1800000-1899999	0	0	1.97835	0	1.97835	0	0	0	0	0	0	0	1.97835	3.95671	0	0	1.97835	1.97835	1.97835
12		1700000-1799999	1.97835	0	0	0	1.97835	1.97835	0	0	0	0	0	1.97835	0	0	0	0	1.97835	1.97835
13		1600000-1699999	0	1.97835	0	0	0	0	0	0	1.97835	0	0	0	1.97835	1.97835	1.97835	0	1.97835
14		1500000-1599999	1.97835	0	3.95671	0	1.97835	1.97835	0	0	0	1.97835	1.97835	0	1.97835	0	0	3.95671
15		1400000-1499999	0	0	0	0	0	1.97835	0	0	0	0	0	1.97835	1.97835	1.97835	11.8701
		1300000-1399999	3.95671	0	0	0	0	0	1.97835	0	1.97835	3.95671	5.93506	0	0	5.93506
		1200000-1299999	1.97835	0	1.97835	1.97835	0	0	1.97835	1.97835	1.97835	0	0	0	29.6753
		1100000-1199999	0	1.97835	0	0	0	1.97835	1.97835	1.97835	0	0	1.97835	5.93506
		1000000-1099999	0	5.93506	0	1.97835	0	1.97835	5.93506	0	1.97835	0	0
		900000-999999	1.97835	0	0	0	1.97835	0	0	0	1.97835	3.95671
		800000-899999	1.97835	1.97835	1.97835	0	0	0	0	0	5.93506
		700000-799999	0	1.97835	0	0	0	1.97835	1.97835	1.97835
		600000-699999	0	1.97835	3.95671	0	0	0	3.95671
		500000-599999	1.97835	0	0	1.97835	0	1.97835
		400000-499999	0	1.97835	0	1.97835	0
		300000-399999	1.97835	1.97835	1.97835	3.95671
		200000-299999	3.95671	0	0
		100000-199999	0	7.91341
		0-99999	7.91341
