# Supplementary material for: Organelle DNA rearrangement mapping reveals U-turn-like inversions as a major source of genomic instability in Arabidopsis and humans
Source: HighWire-hosted journal article supplement (doi:10.1101/gr.188573.114), 2015-03-23
Supplement: SuppTablesS17-22.xlsx [file SuppTablesS17-22.xlsx]

## Sheet: Supp. Table S17
Rearrangement junctions per position per 10000 plastid genomes in A. thaliana polIb
Organism		Genome Positions	0-999	1000-1999	2000-2999	3000-3999	4000-4999	5000-5999	6000-6999	7000-7999	8000-8999	9000-9999	10000-10999	11000-11999	12000-12999	13000-13999	14000-14999	15000-15999	16000-16999	17000-17999	18000-18999	19000-19999	20000-20999	21000-21999	22000-22999	23000-23999	24000-24999	25000-25999	26000-26999	27000-27999	28000-28999	29000-29999	30000-30999	31000-31999	32000-32999	33000-33999	34000-34999	35000-35999	36000-36999	37000-37999	38000-38999	39000-39999	40000-40999	41000-41999	42000-42999	43000-43999	44000-44999	45000-45999	46000-46999
A.thaliana		128000-128214	0	0	0	0	0	0	0	0	0	0	0	0	0	0	0	0	0	0	0	0	0	0	0	0	0	0	0	0	0	0	0	0	0	0	0	0	0	0	0	0	0	0	0	0	0	0	0
Genome		127000-127999	0	0	0	0	0	0	0	0	0	1.45282	0	1.45282	0	1.45282	0	0	0	2.90565	0	0	0	0	0	0	0	1.45282	0	0	0	0	0	0	0	0	1.45282	0	0	2.90565	0	0	0	0	0	1.45282	0	0	0
Plastid		126000-126999	0	0	0	0	0	0	0	0	1.45282	0	0	0	0	1.45282	0	0	0	0	0	0	0	0	0	0	2.90565	0	0	0	0	1.45282	0	0	0	0	0	0	0	0	0	0	0	0	0	0	0	0	0
Line		125000-125999	0	0	0	0	0	0	0	1.45282	0	0	0	0	0	0	0	0	0	0	0	0	0	0	0	0	1.45282	0	0	0	0	0	0	0	0	0	0	0	0	0	0	0	0	0	0	0	0	0	1.45282
Col-0		124000-124999	0	0	0	0	0	0	0	0	0	1.45282	0	0	0	0	0	1.45282	0	0	0	1.45282	0	0	0	0	0	0	0	0	0	0	0	0	0	0	0	0	2.90565	0	0	0	0	0	1.45282	0	0	0	0
Mutations		123000-123999	0	0	0	0	1.45282	0	0	0	0	0	0	0	0	0	0	0	0	1.45282	0	0	0	0	1.45282	0	0	0	0	0	0	0	0	0	0	0	0	0	0	0	0	0	0	0	0	0	0	0	0
polIb		122000-122999	0	1.45282	1.45282	0	0	0	0	0	0	0	0	0	0	1.45282	0	0	0	0	0	0	0	0	0	0	0	0	1.45282	0	0	0	0	0	0	2.90565	0	0	0	0	0	0	0	0	0	0	0	0	0
Total Reads		121000-121999	0	0	0	0	0	0	0	0	0	0	0	0	0	0	0	0	0	0	0	1.45282	0	0	0	0	0	0	0	0	1.45282	0	0	0	0	0	0	0	0	0	0	0	0	0	0	0	0	0	0
10632948		120000-120999	0	0	0	0	0	0	0	0	1.45282	0	0	0	0	0	1.45282	0	1.45282	0	0	1.45282	0	0	0	0	0	0	0	0	0	0	0	0	0	0	0	0	0	1.45282	0	0	0	0	1.45282	0	0	0	0
Total Bases		119000-119999	0	0	0	0	0	1.45282	0	1.45282	0	1.45282	0	0	0	1.45282	0	0	0	0	0	0	0	0	0	0	1.45282	0	0	0	0	0	0	0	1.45282	0	0	1.45282	0	0	0	0	0	0	1.45282	0	0	0	1.45282
1063294800		118000-118999	0	0	0	0	0	1.45282	0	0	0	0	1.45282	0	0	0	0	0	0	0	0	1.45282	0	0	0	0	0	0	0	0	0	0	0	0	0	0	0	0	0	0	0	0	0	0	2.90565	0	0	0	0
Genome Size		117000-117999	1.45282	0	0	0	1.45282	0	0	0	0	0	0	0	0	0	0	0	0	0	0	0	0	0	0	0	0	0	0	0	0	0	0	0	0	0	1.45282	0	0	0	0	0	0	0	0	0	0	0	0
154478		116000-116999	0	0	0	0	0	0	0	0	0	1.45282	0	0	0	0	0	1.45282	0	0	0	0	0	0	0	0	0	0	0	0	0	0	1.45282	0	0	0	0	0	0	0	1.45282	0	0	0	0	0	0	0	0
Multiplier		115000-115999	0	0	0	0	0	0	0	0	0	0	2.90565	0	0	0	0	0	1.45282	0	2.90565	0	0	1.45282	0	0	0	0	0	0	0	0	2.90565	0	0	2.90565	0	0	0	0	0	0	0	2.90565	1.45282	0	0	0	0
1.45282		114000-114999	0	1.45282	0	0	0	0	0	1.45282	0	0	0	0	0	0	0	0	1.45282	0	0	0	1.45282	0	0	0	0	0	0	0	1.45282	0	1.45282	2.90565	0	0	1.45282	0	1.45282	0	0	0	0	0	0	0	1.45282	0	0
		113000-113999	0	0	0	0	0	0	0	0	0	0	0	0	0	2.90565	0	0	0	1.45282	0	0	0	0	0	0	0	0	0	0	0	0	0	0	0	0	0	0	0	0	0	0	0	0	0	0	0	0	0
Color Scale		112000-112999	0	0	0	0	0	0	0	0	0	0	0	0	0	0	0	0	2.90565	0	0	0	0	0	0	0	0	2.90565	0	0	0	0	0	0	0	0	0	0	1.45282	0	0	0	0	0	1.45282	0	0	0	0
0		111000-111999	0	1.45282	0	0	0	0	0	0	0	0	0	0	2.90565	0	1.45282	0	2.90565	0	0	0	0	0	1.45282	0	0	0	0	1.45282	0	0	0	0	0	1.45282	0	0	0	0	0	0	0	0	0	0	0	0	0
1		110000-110999	0	0	0	0	0	0	1.45282	0	0	0	0	2.90565	1.45282	1.45282	0	0	0	1.45282	0	0	1.45282	0	0	1.45282	0	0	0	0	0	0	1.45282	0	0	0	0	0	0	0	0	0	0	0	0	0	0	0	2.90565
2		109000-109999	0	0	0	1.45282	0	0	0	0	0	0	0	1.45282	0	0	0	0	0	0	1.45282	0	0	0	0	0	0	0	0	0	0	0	0	0	0	0	0	0	0	1.45282	0	1.45282	0	0	0	0	0	0	0
3		108000-108999	0	0	1.45282	0	0	0	2.90565	0	1.45282	0	0	0	2.90565	0	1.45282	0	0	2.90565	0	0	1.45282	0	1.45282	0	0	1.45282	0	0	0	0	1.45282	0	0	0	0	0	0	0	1.45282	0	0	0	0	1.45282	0	0	0
4		107000-107999	0	0	0	0	0	0	0	0	0	0	0	0	0	0	0	1.45282	0	0	0	0	0	0	0	2.90565	0	0	0	0	0	0	0	0	0	0	0	0	1.45282	0	0	0	1.45282	1.45282	0	0	0	1.45282	0
5		106000-106999	0	1.45282	0	0	0	0	0	0	1.45282	0	0	0	0	0	1.45282	0	0	0	0	0	0	0	0	0	0	0	0	0	0	0	1.45282	0	0	0	0	0	0	0	0	1.45282	0	0	0	0	0	0	0
6		105000-105999	0	1.45282	0	0	0	0	0	0	0	0	0	0	0	0	0	0	0	0	0	0	0	1.45282	0	0	0	1.45282	0	0	0	0	0	0	0	0	0	1.45282	0	0	0	0	0	0	0	0	0	0	0
7		104000-104999	1.45282	0	0	0	0	0	0	0	0	0	1.45282	0	0	0	0	0	0	0	0	1.45282	0	0	0	0	0	0	0	0	1.45282	1.45282	0	0	0	1.45282	0	0	0	0	0	0	0	2.90565	0	0	0	0	0
8		103000-103999	1.45282	0	0	0	1.45282	0	0	0	0	0	0	4.35847	0	0	2.90565	1.45282	0	0	0	0	0	0	1.45282	2.90565	0	0	0	0	0	0	0	0	0	0	0	0	1.45282	0	1.45282	0	0	0	0	0	0	0	0
9		102000-102999	0	0	0	0	0	0	0	0	0	0	0	2.90565	0	0	0	0	1.45282	0	0	1.45282	0	0	0	0	0	0	0	1.45282	0	0	0	0	0	1.45282	0	0	0	0	0	0	0	1.45282	0	0	0	0	0
10		101000-101999	0	1.45282	0	0	0	0	0	0	0	0	0	0	0	0	0	0	0	0	0	1.45282	0	0	0	0	0	0	0	0	0	0	1.45282	0	0	1.45282	0	0	0	1.45282	0	0	2.90565	1.45282	0	0	1.45282	0	0
11		100000-100999	0	2.90565	1.45282	0	0	0	0	1.45282	0	0	0	0	0	0	0	1.45282	0	2.90565	1.45282	0	0	0	0	0	0	0	0	2.90565	0	0	0	1.45282	1.45282	0	0	0	2.90565	0	0	0	0	1.45282	0	0	0	0	0
12		99000-99999	0	1.45282	0	0	0	0	0	0	0	0	0	0	0	0	1.45282	0	1.45282	0	1.45282	0	2.90565	0	0	0	0	0	0	0	0	2.90565	0	0	0	0	0	0	1.45282	0	1.45282	1.45282	0	0	0	0	0	0	0
13		98000-98999	0	0	0	1.45282	0	0	0	0	0	0	0	0	0	1.45282	0	0	0	0	0	0	0	0	0	0	0	0	0	0	0	0	0	0	0	0	0	0	0	0	1.45282	1.45282	0	0	0	0	0	0	0
14		97000-97999	0	0	1.45282	0	0	0	0	0	0	0	1.45282	0	0	0	0	0	0	0	0	0	0	1.45282	0	0	1.45282	1.45282	0	0	0	2.90565	0	0	0	2.90565	0	1.45282	0	1.45282	1.45282	0	0	0	0	0	0	0	2.90565
15		96000-96999	0	0	0	0	1.45282	0	0	0	0	0	0	0	0	0	0	0	0	0	0	0	0	0	0	0	0	0	0	1.45282	0	0	0	0	0	1.45282	2.90565	0	1.45282	0	0	1.45282	1.45282	1.45282	0	0	0	0	0
		95000-95999	1.45282	0	0	0	0	1.45282	0	0	1.45282	1.45282	0	0	1.45282	0	0	0	2.90565	0	0	0	1.45282	0	0	0	0	0	0	1.45282	0	0	0	0	0	1.45282	0	0	0	0	0	0	1.45282	0	0	0	1.45282	0	1.45282
		94000-94999	0	0	0	0	0	2.90565	0	0	0	0	0	1.45282	0	0	0	1.45282	0	0	0	0	0	0	0	0	0	0	0	1.45282	0	0	0	0	4.35847	0	0	0	0	0	0	0	0	0	1.45282	0	0	0	0
		93000-93999	0	0	0	0	0	1.45282	0	0	0	1.45282	0	0	1.45282	0	0	0	1.45282	0	1.45282	0	0	0	0	0	0	0	0	0	0	0	0	0	0	0	0	0	1.45282	0	1.45282	0	0	0	0	0	1.45282	0	0
		92000-92999	0	1.45282	0	0	0	0	1.45282	0	0	0	1.45282	0	0	0	1.45282	0	0	0	0	1.45282	0	0	0	0	0	0	0	0	0	0	0	0	0	0	0	0	1.45282	0	0	0	0	0	0	0	0	0	0
		91000-91999	0	1.45282	0	0	0	0	0	0	0	0	0	0	0	1.45282	0	0	0	0	0	0	0	1.45282	0	0	0	0	0	0	1.45282	0	1.45282	0	0	0	1.45282	0	0	0	0	0	0	0	0	0	0	0	0
		90000-90999	1.45282	1.45282	0	0	0	0	0	0	0	1.45282	0	0	0	0	0	0	0	1.45282	0	0	0	0	0	1.45282	1.45282	0	0	1.45282	1.45282	0	0	1.45282	2.90565	1.45282	0	0	1.45282	0	0	0	0	0	0	1.45282	0	0	0
		89000-89999	0	0	0	2.90565	0	0	0	0	0	1.45282	0	0	0	0	0	0	0	1.45282	0	1.45282	0	0	1.45282	0	0	4.35847	1.45282	0	0	0	0	0	0	0	0	0	0	1.45282	0	0	0	0	0	0	0	0	0
		88000-88999	0	0	0	0	0	0	0	0	0	1.45282	0	0	1.45282	0	0	0	0	0	0	0	0	0	2.90565	0	1.45282	0	1.45282	0	0	0	0	0	0	1.45282	0	0	0	0	0	0	2.90565	0	0	0	0	2.90565	0
		87000-87999	0	0	0	0	0	0	0	0	0	0	0	0	0	0	0	0	0	0	2.90565	0	0	0	0	0	2.90565	0	0	0	0	1.45282	0	1.45282	0	1.45282	0	0	0	0	0	0	0	0	0	0	0	0	0
		86000-86999	0	0	0	0	0	1.45282	0	1.45282	0	0	0	0	0	0	0	0	0	0	0	0	0	0	1.45282	2.90565	0	0	0	0	0	1.45282	0	0	0	1.45282	0	0	0	0	0	0	0	0	1.45282	0	0	0	0
		85000-85999	0	0	0	0	0	0	0	1.45282	1.45282	0	0	0	0	0	0	1.45282	1.45282	0	0	0	0	0	0	1.45282	0	0	0	0	0	0	0	0	0	0	0	1.45282	0	1.45282	0	1.45282	0	1.45282	0	0	0	0	0
		84000-84999	15.9811	0	0	1.45282	0	0	0	0	1.45282	0	0	2.90565	0	0	0	0	0	0	1.45282	0	0	0	0	0	0	0	0	0	0	0	0	0	0	1.45282	1.45282	0	0	0	0	0	0	0	0	0	1.45282	0	0
		83000-83999	0	2.90565	0	0	0	1.45282	0	1.45282	0	0	0	0	0	0	0	0	0	1.45282	0	0	0	0	0	0	0	0	0	0	0	0	0	0	0	0	0	0	0	0	0	0	0	0	2.90565	0	0	0	2.90565
		82000-82999	0	1.45282	0	0	1.45282	0	0	0	0	0	1.45282	0	0	0	0	0	0	0	0	0	0	0	0	0	0	1.45282	0	0	0	0	2.90565	0	1.45282	0	0	1.45282	0	0	0	0	0	0	0	0	0	0	1.45282
		81000-81999	0	0	0	0	0	0	0	0	0	0	0	0	0	0	0	0	0	0	0	0	0	0	0	1.45282	0	0	0	0	0	1.45282	1.45282	0	0	0	1.45282	0	1.45282	0	0	0	0	0	0	0	0	0	0
		80000-80999	0	1.45282	0	0	0	0	1.45282	1.45282	0	0	0	0	1.45282	0	0	0	0	0	0	0	0	0	0	1.45282	0	1.45282	0	0	0	0	1.45282	0	0	1.45282	0	0	1.45282	0	0	0	0	0	0	0	0	0	0
		79000-79999	0	0	0	0	0	0	0	0	0	0	0	0	0	0	0	0	0	0	0	0	0	0	0	1.45282	0	0	0	0	1.45282	0	0	0	0	0	0	0	0	0	0	0	1.45282	0	0	0	0	1.45282	1.45282
		78000-78999	0	0	1.45282	0	1.45282	0	0	0	0	0	0	0	0	0	0	1.45282	0	0	0	0	0	0	0	0	0	0	0	0	0	0	0	1.45282	0	0	0	0	0	0	0	1.45282	0	0	0	0	0	1.45282	1.45282
		77000-77999	0	0	0	0	0	0	0	0	0	0	0	0	0	0	1.45282	0	0	0	0	0	0	0	1.45282	0	0	0	0	0	0	0	0	0	0	0	0	0	0	0	0	0	0	0	0	0	0	0	0
		76000-76999	0	0	0	0	0	0	0	0	0	0	0	1.45282	0	0	0	0	0	1.45282	0	0	0	0	0	0	0	0	0	0	0	2.90565	1.45282	1.45282	0	0	0	0	0	1.45282	1.45282	0	0	0	0	1.45282	1.45282	0	0
		75000-75999	0	1.45282	1.45282	0	0	0	0	0	0	0	0	0	0	0	0	0	0	0	0	0	0	1.45282	0	0	0	1.45282	0	0	1.45282	0	0	0	0	0	0	0	0	0	0	0	0	0	0	0	0	0	0
		74000-74999	0	0	0	0	0	0	0	0	0	0	0	0	0	0	1.45282	0	0	1.45282	0	0	0	0	0	0	0	0	0	0	0	0	0	0	1.45282	0	0	0	0	0	0	0	0	0	0	0	0	0	0
		73000-73999	0	0	0	0	0	0	0	0	1.45282	0	0	0	0	0	1.45282	0	0	0	0	0	0	0	0	0	0	0	0	0	1.45282	0	0	0	0	0	0	0	0	0	0	0	0	0	0	0	0	0	0
		72000-72999	0	0	0	0	0	0	0	0	0	0	0	0	0	0	0	0	0	0	0	0	0	0	0	0	0	0	0	0	0	0	0	0	0	0	0	0	0	0	0	0	0	2.90565	0	0	0	0	0
		71000-71999	0	0	0	0	0	0	1.45282	0	0	0	0	0	0	0	0	0	1.45282	0	0	0	0	1.45282	0	0	1.45282	0	0	0	0	0	0	0	0	0	0	0	0	0	0	0	0	0	0	0	0	0	0
		70000-70999	0	0	1.45282	0	0	0	0	0	0	0	0	0	0	0	0	0	0	0	0	0	1.45282	0	0	1.45282	0	0	1.45282	0	0	0	0	1.45282	0	0	1.45282	0	0	0	0	0	0	0	0	0	1.45282	0	0
		69000-69999	1.45282	0	0	0	0	0	0	0	0	0	0	0	0	0	0	4.35847	0	0	0	0	0	0	0	2.90565	0	0	0	0	0	0	0	0	0	0	0	0	0	0	0	0	0	0	1.45282	0	0	0	0
		68000-68999	0	1.45282	0	0	0	0	0	0	0	1.45282	0	0	0	0	0	0	0	0	0	0	0	0	0	0	0	0	1.45282	1.45282	0	0	0	0	0	0	0	0	0	1.45282	0	0	0	0	0	0	0	0	0
		67000-67999	0	0	0	0	0	0	0	1.45282	0	0	0	0	0	0	0	0	0	0	0	0	0	0	0	0	0	0	0	0	0	0	0	0	1.45282	0	0	0	0	0	0	0	0	0	0	0	0	0	0
		66000-66999	0	0	0	0	0	0	0	0	0	0	0	0	0	1.45282	0	0	2.90565	1.45282	0	0	0	0	0	0	1.45282	0	0	0	0	0	1.45282	2.90565	0	0	0	1.45282	0	0	0	0	0	0	0	0	0	0	0
		65000-65999	0	0	0	0	0	0	0	0	0	0	1.45282	0	0	0	0	0	0	0	1.45282	0	0	1.45282	1.45282	0	0	0	0	0	0	1.45282	1.45282	0	0	0	0	0	0	0	0	0	0	0	0	0	1.45282	0	0
		64000-64999	0	0	0	2.90565	0	0	0	0	0	0	0	0	0	0	0	0	1.45282	0	0	0	0	0	0	0	0	0	0	0	0	0	0	1.45282	0	0	0	0	0	0	0	0	0	0	0	1.45282	0	0	0
		63000-63999	0	1.45282	0	0	0	0	0	0	0	0	0	0	0	0	0	0	0	0	0	0	0	0	0	0	0	0	0	0	1.45282	0	0	0	0	0	1.45282	0	0	0	0	0	0	1.45282	0	0	1.45282	0	1.45282
		62000-62999	0	0	0	0	0	0	0	0	0	0	0	0	0	0	0	0	0	0	0	0	0	0	0	0	0	0	0	0	0	0	0	0	0	0	0	0	0	0	0	0	0	0	0	0	0	0	0
		61000-61999	0	0	0	0	0	1.45282	0	0	0	0	0	0	0	0	0	1.45282	0	0	0	1.45282	0	0	0	0	0	0	0	1.45282	0	0	0	0	0	0	0	0	0	0	0	0	0	0	0	0	0	0	0
		60000-60999	0	0	1.45282	0	0	0	0	0	0	0	0	0	1.45282	0	0	0	1.45282	0	0	0	0	0	0	0	0	0	0	0	0	0	0	0	0	0	0	0	0	0	0	0	0	0	0	0	0	0	0
		59000-59999	0	0	1.45282	0	1.45282	0	0	0	0	0	0	0	0	1.45282	0	0	0	0	0	0	0	0	0	0	0	0	0	0	0	0	0	0	1.45282	0	0	0	2.90565	0	0	0	0	0	0	0	1.45282	1.45282	0
		58000-58999	0	0	0	0	0	0	0	0	0	0	0	0	0	0	1.45282	0	0	0	0	0	0	0	1.45282	0	0	0	0	0	0	0	0	0	0	0	0	1.45282	0	0	0	0	0	0	0	0	0	0	0
		57000-57999	0	0	0	0	0	0	0	1.45282	0	0	0	0	0	1.45282	0	0	0	0	0	0	0	0	0	0	0	0	0	0	0	1.45282	0	0	0	0	0	0	0	0	0	0	0	0	0	0	0	0	0
		56000-56999	0	0	1.45282	0	0	0	1.45282	0	0	0	0	0	0	0	0	0	0	0	1.45282	0	0	0	0	1.45282	0	0	0	0	0	0	0	0	0	0	0	0	0	0	0	0	0	1.45282	0	0	0	0	0
		55000-55999	0	0	0	0	0	0	0	0	1.45282	0	0	0	1.45282	0	0	0	0	0	0	0	0	0	0	0	0	0	0	0	0	0	0	0	1.45282	0	0	0	0	0	0	0	0	0	0	2.90565	0	0	0
		54000-54999	0	0	0	0	0	0	1.45282	0	0	0	0	0	0	0	1.45282	0	0	0	0	1.45282	0	0	0	0	0	0	0	0	0	0	0	0	0	0	0	1.45282	0	0	0	0	0	0	0	0	0	0	2.90565
		53000-53999	0	0	0	0	0	0	0	0	0	0	0	0	0	0	0	0	0	1.45282	0	0	1.45282	0	1.45282	0	0	0	0	1.45282	0	0	0	0	0	0	0	0	0	0	1.45282	0	0	0	0	1.45282	0	0	0
		52000-52999	0	0	0	0	0	0	0	0	0	0	0	0	0	0	0	0	0	0	0	0	0	0	0	0	1.45282	0	0	0	0	0	0	2.90565	1.45282	0	0	0	1.45282	0	0	0	0	1.45282	0	0	0	0	1.45282
		51000-51999	0	0	0	0	0	0	0	0	0	0	0	0	0	0	0	0	0	0	0	0	0	0	0	0	0	0	0	0	0	0	0	0	0	0	0	0	0	0	0	1.45282	0	0	0	0	0	0	0
		50000-50999	0	0	0	0	0	0	0	1.45282	0	0	0	0	0	0	1.45282	0	0	0	0	0	0	1.45282	0	0	0	0	0	0	0	0	0	0	0	0	0	0	0	0	0	0	0	0	0	0	0	0	0
		49000-49999	0	0	0	0	0	0	1.45282	0	0	0	0	0	1.45282	0	0	0	0	0	0	0	0	0	1.45282	0	0	0	0	0	0	0	0	0	0	0	1.45282	0	0	0	0	2.90565	0	0	0	0	0	0	1.45282
		48000-48999	0	0	0	0	0	0	0	1.45282	0	0	0	0	0	0	0	0	0	0	0	0	0	0	0	0	0	0	0	0	0	0	0	0	0	0	0	0	0	0	0	0	0	0	0	0	0	0	1.45282
		47000-47999	0	0	0	0	0	0	0	0	0	0	0	0	0	0	0	0	0	0	1.45282	0	0	0	0	0	0	0	0	0	1.45282	0	0	0	0	0	0	0	0	1.45282	0	0	0	0	0	1.45282	0	0	0
		46000-46999	1.45282	0	0	0	0	0	0	0	1.45282	0	0	0	0	1.45282	0	0	0	1.45282	1.45282	0	0	0	0	0	1.45282	0	0	0	0	0	0	0	1.45282	0	0	1.45282	0	0	1.45282	0	0	0	1.45282	0	0	0	7.26412
		45000-45999	1.45282	0	0	0	1.45282	1.45282	0	1.45282	0	0	1.45282	0	0	0	0	1.45282	0	0	0	0	0	0	0	0	0	0	1.45282	0	1.45282	0	0	0	1.45282	0	0	0	0	0	0	0	0	1.45282	0	0	0	11.6226
		44000-44999	0	0	0	0	0	0	0	1.45282	0	0	0	0	1.45282	0	0	0	0	0	0	0	0	0	0	0	0	0	0	0	0	0	0	0	1.45282	0	0	0	0	0	1.45282	0	0	1.45282	0	0	14.5282
		43000-43999	0	0	0	0	0	0	0	0	0	0	1.45282	0	0	1.45282	0	0	0	1.45282	0	0	0	0	0	1.45282	0	0	0	0	0	0	0	0	0	1.45282	0	0	0	0	0	0	0	0	0	2.90565
		42000-42999	0	0	0	0	0	0	0	0	0	0	1.45282	0	0	0	0	1.45282	0	0	0	0	0	0	0	0	0	0	0	0	0	0	1.45282	0	0	0	0	0	0	0	0	0	0	0	13.0754
		41000-41999	0	0	0	0	0	0	0	0	0	0	0	0	0	0	0	1.45282	0	0	0	0	0	0	0	0	0	0	0	0	0	0	0	0	0	0	0	0	0	1.45282	0	1.45282	4.35847	10.1698
		40000-40999	0	0	0	0	0	0	0	0	0	0	0	2.90565	0	0	0	0	0	0	0	0	0	0	0	0	0	0	0	0	0	0	0	0	0	0	0	0	0	0	0	1.45282	14.5282
		39000-39999	0	0	0	0	0	0	0	0	0	0	0	0	1.45282	0	0	0	0	0	0	0	0	0	0	0	0	0	1.45282	0	0	0	0	0	0	0	0	2.90565	0	1.45282	0	1.45282
		38000-38999	0	0	0	0	0	0	0	0	0	0	0	0	0	0	0	0	0	0	0	0	0	0	2.90565	0	0	1.45282	0	0	0	0	0	0	0	1.45282	0	0	0	0	4.35847
		37000-37999	0	4.35847	0	0	0	1.45282	0	0	0	0	0	0	0	4.35847	0	0	0	0	0	0	0	1.45282	0	0	0	0	0	0	0	0	0	0	0	0	0	0	2.90565	8.71694
		36000-36999	0	0	0	0	0	0	0	0	0	0	0	0	0	1.45282	0	0	0	0	0	0	0	0	0	0	0	0	0	0	0	0	1.45282	0	0	0	0	0	4.35847
		35000-35999	0	0	0	1.45282	0	0	0	0	0	0	0	0	0	0	1.45282	0	0	0	0	0	0	0	0	0	0	0	0	0	0	0	0	0	0	0	1.45282	11.6226
		34000-34999	0	0	0	0	0	0	0	0	0	0	0	0	0	0	0	0	0	0	0	0	0	0	0	0	0	0	0	0	0	0	0	1.45282	0	0	5.8113
		33000-33999	0	0	0	0	0	0	0	0	0	0	0	0	0	0	0	0	0	0	0	0	0	0	1.45282	0	0	0	0	1.45282	1.45282	1.45282	1.45282	0	2.90565	4.35847
		32000-32999	0	0	0	0	1.45282	0	0	0	1.45282	0	0	0	0	0	0	0	0	0	0	0	0	0	0	1.45282	0	0	0	0	0	0	2.90565	2.90565	8.71694
		31000-31999	0	1.45282	0	0	0	1.45282	0	0	0	0	0	0	0	0	0	0	0	0	0	0	0	0	0	0	0	1.45282	0	0	0	0	1.45282	5.8113
		30000-30999	0	0	0	0	0	0	0	0	1.45282	0	0	0	0	2.90565	0	0	0	0	0	0	0	0	0	0	0	0	0	0	0	1.45282	8.71694
		29000-29999	0	1.45282	0	0	0	0	1.45282	0	0	0	0	0	0	0	0	0	0	0	0	0	0	0	0	1.45282	1.45282	0	0	0	0	5.8113
		28000-28999	0	0	0	1.45282	0	0	0	0	0	0	0	0	0	0	1.45282	1.45282	0	0	0	0	0	0	1.45282	0	0	0	0	0	5.8113
		27000-27999	0	0	0	0	0	0	0	0	0	0	0	0	0	0	0	0	0	0	0	0	1.45282	0	1.45282	0	0	0	2.90565	11.6226
		26000-26999	0	0	0	0	0	0	0	0	0	0	0	0	0	0	1.45282	0	0	0	0	0	0	0	0	0	0	0	8.71694
		25000-25999	0	0	0	1.45282	0	1.45282	0	0	0	0	1.45282	0	0	0	0	0	0	0	0	0	0	2.90565	0	0	0	10.1698
		24000-24999	0	1.45282	0	0	0	0	0	0	0	0	0	0	1.45282	0	1.45282	0	0	0	0	0	1.45282	0	0	1.45282	10.1698
		23000-23999	0	1.45282	0	1.45282	0	0	0	0	0	0	0	0	0	0	0	0	0	0	0	0	0	0	0	8.71694
		22000-22999	0	0	0	0	1.45282	1.45282	2.90565	0	0	0	0	0	0	0	0	1.45282	0	0	0	0	1.45282	0	4.35847
		21000-21999	0	0	0	0	0	0	0	0	0	0	0	0	0	1.45282	0	0	0	1.45282	0	0	0	2.90565
		20000-20999	0	0	1.45282	0	0	0	0	0	0	1.45282	0	0	0	0	0	0	0	0	1.45282	1.45282	2.90565
		19000-19999	1.45282	0	0	0	1.45282	0	0	0	0	0	0	0	0	0	0	0	0	0	1.45282	7.26412
		18000-18999	0	0	0	0	0	0	0	1.45282	0	0	0	0	0	0	0	0	0	0	2.90565
		17000-17999	0	1.45282	0	0	0	0	0	0	0	0	0	0	0	0	0	0	1.45282	5.8113
		16000-16999	0	0	0	0	0	1.45282	0	0	0	1.45282	0	0	0	0	0	0	11.6226
		15000-15999	0	0	1.45282	0	1.45282	0	0	0	0	0	0	0	0	0	1.45282	7.26412
		14000-14999	0	0	0	0	0	0	0	0	0	0	0	0	0	0	5.8113
		13000-13999	0	0	0	0	0	0	0	0	0	0	0	0	0	15.9811
		12000-12999	0	1.45282	0	1.45282	0	0	0	0	0	0	0	0	5.8113
		11000-11999	0	0	0	0	0	0	0	0	0	0	0	10.1698
		10000-10999	0	0	0	0	0	1.45282	0	0	0	0	4.35847
		9000-9999	0	1.45282	0	0	0	0	0	0	0	13.0754
		8000-8999	0	1.45282	0	0	0	0	0	0	2.90565
		7000-7999	0	0	0	2.90565	0	1.45282	1.45282	11.6226
		6000-6999	0	0	0	0	0	1.45282	8.71694
		5000-5999	0	0	1.45282	1.45282	0	7.26412
		4000-4999	1.45282	0	0	0	5.8113
		3000-3999	0	0	0	10.1698
		2000-2999	1.45282	0	14.5282
		1000-1999	0	4.35847
		0-999	5.8113
[truncated: 82 more columns]

## Sheet: Supp. Table S18
Rearrangement junctions per position per 10000 plastid genomes in A. thaliana reca1
Organism		Genome Positions	0-999	1000-1999	2000-2999	3000-3999	4000-4999	5000-5999	6000-6999	7000-7999	8000-8999	9000-9999	10000-10999	11000-11999	12000-12999	13000-13999	14000-14999	15000-15999	16000-16999	17000-17999	18000-18999	19000-19999	20000-20999	21000-21999	22000-22999	23000-23999	24000-24999	25000-25999	26000-26999	27000-27999	28000-28999	29000-29999	30000-30999	31000-31999	32000-32999	33000-33999	34000-34999	35000-35999	36000-36999	37000-37999	38000-38999	39000-39999	40000-40999	41000-41999	42000-42999	43000-43999	44000-44999	45000-45999	46000-46999
A.thaliana		128000-128214	0	0	0	0	0	0	0	0	0	0	0	0	0	0	0	1.36666	0	0	0	0	0	0	0	0	0	0	0	0	0	0	0	0	0	0	0	0	0	0	0	0	1.36666	0	0	0	0	0	0
Genome		127000-127999	0	0	0	0	0	0	0	0	0	0	0	0	0	0	0	0	1.36666	0	0	0	0	0	0	0	0	0	0	0	1.36666	1.36666	0	0	1.36666	1.36666	0	0	0	0	0	0	0	0	0	1.36666	0	0	1.36666
Plastid		126000-126999	0	0	1.36666	0	0	0	0	0	0	1.36666	0	0	0	1.36666	0	0	0	0	0	0	0	0	1.36666	0	0	0	0	0	0	0	0	0	1.36666	1.36666	1.36666	0	0	0	1.36666	1.36666	0	0	0	0	0	0	0
Line		125000-125999	0	0	0	0	2.73332	1.36666	0	0	0	0	0	0	0	0	0	1.36666	0	1.36666	0	0	0	0	0	0	0	0	0	0	0	0	1.36666	0	0	0	0	0	1.36666	0	0	0	0	0	0	0	1.36666	0	0
Col-0		124000-124999	0	0	1.36666	0	0	1.36666	0	0	0	0	0	1.36666	0	0	0	0	1.36666	0	0	0	0	0	0	0	0	1.36666	0	0	1.36666	1.36666	0	1.36666	0	0	1.36666	0	0	0	0	0	0	0	0	0	0	0	4.09999
Mutations		123000-123999	0	0	0	0	1.36666	0	0	0	0	0	0	0	0	0	0	0	0	0	0	1.36666	0	0	0	0	0	2.73332	1.36666	0	0	1.36666	0	0	0	0	0	0	1.36666	0	0	1.36666	0	0	1.36666	0	0	0	1.36666
reca1		122000-122999	0	1.36666	0	0	0	0	0	0	0	0	0	0	0	0	1.36666	0	0	0	0	0	0	0	0	0	0	0	0	0	0	0	0	1.36666	0	0	0	0	0	0	0	0	0	0	0	0	0	0	0
Total Reads		121000-121999	0	0	0	0	0	1.36666	1.36666	0	0	0	0	0	0	0	1.36666	0	0	1.36666	1.36666	0	0	0	0	0	1.36666	0	0	0	0	0	0	1.36666	0	1.36666	0	1.36666	0	0	0	0	0	0	0	0	0	0	0
11303305		120000-120999	0	1.36666	1.36666	0	0	0	0	0	0	0	0	0	0	0	0	0	0	0	0	0	0	0	0	0	0	1.36666	0	0	0	0	1.36666	1.36666	0	0	0	0	0	0	0	0	0	0	0	1.36666	0	0	0
Total Bases		119000-119999	0	1.36666	0	0	0	0	0	0	0	0	1.36666	0	0	0	0	0	0	0	0	0	0	0	0	0	0	0	0	0	0	0	0	0	0	0	0	0	0	0	0	0	0	0	0	0	0	0	0
1130330500		118000-118999	0	0	0	0	0	0	0	0	1.36666	0	0	0	0	0	1.36666	0	0	0	0	0	0	0	1.36666	0	0	0	0	0	0	0	1.36666	0	0	0	0	0	0	0	0	0	0	0	0	0	0	0	1.36666
Genome Size		117000-117999	0	0	1.36666	0	0	1.36666	0	0	1.36666	0	0	0	0	1.36666	1.36666	0	0	0	0	0	0	0	0	0	0	0	0	0	0	0	0	0	0	0	0	0	0	1.36666	0	0	0	0	0	0	0	0	0
154478		116000-116999	0	0	0	0	0	0	0	0	0	0	0	0	0	0	1.36666	0	0	0	0	0	0	0	0	0	0	0	0	0	0	1.36666	0	0	0	0	0	0	0	0	1.36666	0	0	0	0	0	0	0	0
Multiplier		115000-115999	0	0	0	0	2.73332	1.36666	0	0	0	0	0	0	0	1.36666	1.36666	2.73332	0	0	0	1.36666	0	0	1.36666	0	0	0	0	0	0	0	0	1.36666	0	0	0	1.36666	0	0	0	0	0	0	0	0	1.36666	1.36666	0
1.36666		114000-114999	2.73332	0	0	0	0	0	0	0	0	0	0	0	0	0	0	0	0	0	0	0	0	0	0	0	0	0	0	0	0	1.36666	0	1.36666	0	0	0	0	0	0	0	1.36666	0	0	0	0	0	1.36666	1.36666
		113000-113999	0	0	0	1.36666	0	0	0	0	1.36666	0	0	0	0	0	0	0	0	0	0	0	0	0	0	0	0	0	0	0	1.36666	0	0	0	0	0	0	0	0	0	0	0	0	0	1.36666	0	0	0	1.36666
Color Scale		112000-112999	0	0	0	0	1.36666	0	0	0	0	0	0	0	0	1.36666	0	0	1.36666	0	2.73332	0	0	0	0	0	0	0	0	0	1.36666	0	0	0	1.36666	0	0	0	0	0	0	0	0	0	1.36666	0	0	0	0
0		111000-111999	0	0	0	0	0	0	0	0	0	0	0	0	0	0	0	0	0	0	0	0	0	1.36666	0	0	0	0	0	0	0	0	0	0	0	0	0	0	0	1.36666	0	0	0	0	0	0	0	0	0
1		110000-110999	0	0	0	0	0	1.36666	0	0	0	0	0	0	0	0	0	0	0	1.36666	0	0	0	0	1.36666	0	0	0	0	0	1.36666	0	0	0	0	1.36666	0	0	1.36666	0	0	0	0	0	1.36666	0	0	0	1.36666
2		109000-109999	1.36666	0	0	0	0	0	1.36666	0	0	0	2.73332	0	0	0	0	0	0	0	0	0	2.73332	0	0	0	0	0	0	0	0	0	0	0	0	0	1.36666	0	0	0	1.36666	1.36666	0	0	0	0	0	1.36666	0
3		108000-108999	0	1.36666	0	0	1.36666	0	1.36666	0	0	0	0	1.36666	0	0	0	0	0	0	0	0	2.73332	1.36666	0	0	0	0	0	0	1.36666	0	0	0	0	0	0	1.36666	0	0	0	0	0	1.36666	0	0	0	0	0
4		107000-107999	1.36666	1.36666	0	0	0	0	0	0	0	0	0	0	0	0	1.36666	0	0	0	0	1.36666	0	0	0	0	0	0	0	0	0	0	0	0	0	2.73332	0	0	0	0	0	0	0	0	0	0	0	0	1.36666
5		106000-106999	0	0	0	0	0	0	0	0	0	0	0	2.73332	0	0	1.36666	0	0	0	0	0	0	0	0	0	0	0	0	0	0	0	0	0	0	0	0	0	0	0	0	0	0	0	1.36666	0	0	0	0
6		105000-105999	0	0	0	1.36666	0	0	0	0	0	0	0	0	0	0	1.36666	0	1.36666	0	0	0	0	0	0	0	0	0	0	0	0	0	0	0	0	0	1.36666	0	0	0	0	0	0	0	0	0	0	0	0
7		104000-104999	0	1.36666	1.36666	0	0	0	0	0	0	0	0	0	0	1.36666	0	0	0	0	0	0	0	1.36666	0	0	0	0	0	0	0	0	1.36666	0	0	0	1.36666	0	0	1.36666	1.36666	0	0	0	0	0	0	0	0
8		103000-103999	0	0	1.36666	0	0	0	0	0	0	0	0	1.36666	0	0	0	0	0	0	0	1.36666	0	0	0	0	0	0	0	0	1.36666	0	0	0	0	0	0	0	0	1.36666	0	0	0	0	0	0	0	0	1.36666
9		102000-102999	0	0	0	0	1.36666	0	0	0	0	0	0	0	0	0	0	0	1.36666	1.36666	0	0	0	0	0	0	0	0	0	0	0	0	0	0	0	2.73332	0	0	0	0	0	0	0	0	0	0	0	0	0
10		101000-101999	0	0	0	0	0	0	0	0	0	0	0	0	0	0	0	0	0	1.36666	0	0	0	0	0	0	0	0	0	1.36666	0	0	2.73332	0	0	0	0	0	0	0	0	0	0	0	0	0	0	0	0
11		100000-100999	0	0	0	1.36666	0	0	0	0	0	0	0	0	0	0	0	0	1.36666	0	0	0	2.73332	0	0	0	0	0	0	2.73332	0	0	5.46665	0	0	0	1.36666	1.36666	0	0	0	0	0	0	0	0	0	0	1.36666
12		99000-99999	1.36666	0	0	1.36666	1.36666	0	0	0	0	0	0	0	0	0	2.73332	0	0	0	1.36666	0	0	0	0	0	0	0	0	0	0	0	1.36666	0	0	0	1.36666	2.73332	0	0	0	0	0	0	0	0	0	0	1.36666
13		98000-98999	0	1.36666	0	0	0	1.36666	0	1.36666	1.36666	0	0	0	0	0	0	0	0	0	0	0	0	0	0	0	0	0	0	0	0	0	1.36666	0	0	0	0	0	0	0	0	0	0	1.36666	0	0	1.36666	1.36666	0
14		97000-97999	0	0	0	0	0	0	1.36666	0	0	0	0	0	0	0	0	0	0	0	0	0	1.36666	0	0	0	0	0	0	0	0	2.73332	2.73332	0	0	1.36666	0	0	0	0	0	0	0	0	2.73332	0	0	0	0
15		96000-96999	0	0	0	0	0	0	0	0	0	0	0	0	0	0	0	0	0	0	0	0	0	1.36666	0	0	0	0	0	0	1.36666	0	0	0	0	0	1.36666	0	0	0	0	1.36666	0	0	0	0	0	0	1.36666
		95000-95999	0	0	0	0	0	0	0	0	0	1.36666	0	0	0	0	0	0	0	0	0	0	0	0	0	1.36666	0	0	1.36666	0	1.36666	0	0	0	1.36666	0	0	0	0	1.36666	0	0	0	0	0	0	0	0	0
		94000-94999	1.36666	0	0	0	0	1.36666	0	0	0	0	0	1.36666	1.36666	0	0	1.36666	1.36666	0	0	1.36666	0	0	0	1.36666	0	0	0	0	0	1.36666	0	0	0	0	0	0	0	0	0	0	0	0	1.36666	0	0	0	0
		93000-93999	0	1.36666	0	0	0	0	1.36666	1.36666	0	0	0	0	1.36666	0	0	0	0	1.36666	1.36666	0	0	0	0	0	0	0	0	0	1.36666	1.36666	0	0	2.73332	0	0	0	1.36666	1.36666	0	0	0	0	0	0	0	1.36666	1.36666
		92000-92999	0	0	0	0	0	0	1.36666	1.36666	0	1.36666	0	0	0	0	0	0	0	0	0	0	0	0	1.36666	0	0	0	2.73332	0	2.73332	0	0	0	0	0	0	0	0	0	0	0	0	0	1.36666	0	0	0	0
		91000-91999	0	1.36666	0	0	0	0	0	0	0	0	0	0	0	0	0	1.36666	0	1.36666	2.73332	0	2.73332	0	0	0	0	0	0	0	0	0	0	0	0	0	0	0	0	0	1.36666	0	0	0	0	0	0	1.36666	1.36666
		90000-90999	0	0	0	0	0	0	0	0	1.36666	1.36666	0	0	0	0	0	0	0	0	0	0	0	0	0	0	0	0	0	1.36666	0	0	0	0	0	1.36666	0	0	0	1.36666	0	2.73332	1.36666	2.73332	0	0	0	0	1.36666
		89000-89999	0	1.36666	1.36666	0	0	1.36666	0	0	1.36666	1.36666	0	0	0	1.36666	0	0	0	0	1.36666	0	0	0	0	2.73332	1.36666	0	0	0	0	0	0	0	0	0	0	0	0	0	0	0	0	0	0	0	2.73332	2.73332	0
		88000-88999	0	0	0	0	0	0	0	0	0	1.36666	0	0	0	1.36666	0	0	1.36666	0	0	0	0	0	0	0	0	0	1.36666	0	0	0	0	0	0	1.36666	0	1.36666	0	0	0	0	0	0	1.36666	0	0	0	0
		87000-87999	0	0	0	0	0	0	0	0	0	0	0	1.36666	0	0	0	0	1.36666	0	0	0	0	0	0	0	1.36666	0	0	0	0	0	0	0	0	0	0	1.36666	0	0	1.36666	0	0	0	0	0	0	0	0
		86000-86999	0	0	0	0	0	0	0	1.36666	0	1.36666	0	0	0	0	0	0	0	0	0	1.36666	1.36666	0	0	0	0	0	1.36666	1.36666	0	0	1.36666	0	0	0	0	0	0	1.36666	0	0	0	0	0	0	0	0	0
		85000-85999	2.73332	0	0	0	1.36666	0	0	0	0	0	1.36666	0	0	0	0	0	0	0	0	0	0	0	0	0	0	0	0	0	0	0	0	0	0	0	0	1.36666	1.36666	0	1.36666	0	1.36666	0	0	0	0	0	0
		84000-84999	9.56664	0	0	0	0	0	0	0	0	0	0	0	0	0	0	0	0	0	0	0	0	0	0	0	0	0	0	0	0	0	0	1.36666	0	1.36666	1.36666	0	0	0	0	0	0	0	0	0	0	0	0
		83000-83999	0	0	0	0	0	0	0	0	0	0	0	0	0	0	0	0	0	0	0	0	0	1.36666	0	0	0	0	0	0	0	0	0	0	0	0	0	0	0	0	0	0	0	0	0	0	0	0	0
		82000-82999	0	0	0	0	0	1.36666	1.36666	0	0	0	0	0	0	0	0	1.36666	0	0	0	0	0	0	0	0	0	0	0	0	0	0	2.73332	0	0	2.73332	0	1.36666	0	1.36666	0	0	0	0	0	0	1.36666	0	0
		81000-81999	0	0	0	0	0	0	0	0	0	0	0	0	0	0	0	0	0	0	0	1.36666	0	0	1.36666	1.36666	1.36666	0	0	0	0	1.36666	0	0	0	0	0	0	1.36666	0	0	0	0	0	0	0	0	0	0
		80000-80999	0	0	0	0	0	0	0	0	0	0	0	0	0	0	0	0	0	0	0	0	0	0	0	0	0	0	0	0	0	0	1.36666	0	0	0	0	0	0	1.36666	0	0	0	0	0	0	0	0	0
		79000-79999	0	1.36666	0	1.36666	0	0	0	1.36666	0	0	0	0	0	0	1.36666	0	0	0	0	0	0	0	0	0	0	1.36666	0	0	0	0	0	0	0	1.36666	0	0	0	0	0	0	0	0	0	0	1.36666	0	0
		78000-78999	0	0	0	0	0	0	0	2.73332	0	0	0	0	0	0	0	0	0	0	0	0	0	0	0	0	0	0	0	0	0	0	0	0	0	0	1.36666	1.36666	1.36666	0	0	0	0	0	0	0	0	0	0
		77000-77999	0	0	0	0	0	0	0	0	0	0	0	0	0	0	0	0	0	0	1.36666	0	0	1.36666	0	0	0	0	0	0	0	0	0	0	0	0	0	0	0	0	0	0	0	0	0	0	0	0	0
		76000-76999	0	0	0	0	0	0	0	0	0	0	2.73332	0	0	0	0	0	0	0	0	0	0	0	0	0	1.36666	0	0	1.36666	0	0	0	0	0	0	0	0	0	0	0	1.36666	0	0	0	0	0	0	0
		75000-75999	0	0	0	0	0	0	0	0	0	0	0	0	0	0	0	0	1.36666	0	0	0	0	0	0	0	0	0	0	0	0	0	0	0	0	0	0	0	0	0	0	1.36666	0	0	1.36666	0	0	0	0
		74000-74999	1.36666	0	0	1.36666	0	0	0	0	0	0	0	0	0	0	0	0	0	0	0	0	0	0	0	0	0	0	0	0	0	1.36666	0	0	0	0	0	0	1.36666	0	0	0	0	0	0	0	2.73332	0	0
		73000-73999	0	0	0	0	0	0	0	0	0	1.36666	0	0	0	0	0	0	0	0	0	1.36666	0	0	0	0	0	0	0	1.36666	0	0	0	0	0	0	0	1.36666	0	0	0	0	0	0	0	1.36666	0	0	0
		72000-72999	1.36666	0	0	1.36666	1.36666	0	0	0	0	0	0	0	0	0	0	0	1.36666	1.36666	0	0	0	0	0	0	0	0	1.36666	0	0	0	1.36666	0	0	0	0	0	0	0	0	0	0	0	0	0	0	0	0
		71000-71999	0	1.36666	0	0	0	0	0	0	0	1.36666	0	0	0	0	0	0	0	0	0	1.36666	0	0	0	0	0	0	0	0	0	0	0	0	0	0	0	0	0	0	0	0	0	0	0	0	0	0	0
		70000-70999	0	0	0	0	0	0	0	0	0	0	0	0	0	0	2.73332	0	0	0	0	0	0	0	0	0	1.36666	0	0	0	1.36666	0	0	0	0	0	0	1.36666	0	0	0	0	0	0	1.36666	0	0	0	0
		69000-69999	0	0	0	0	0	0	0	0	0	0	0	0	0	0	0	1.36666	0	0	0	1.36666	0	0	0	0	0	1.36666	0	0	0	0	1.36666	0	1.36666	0	0	0	0	0	0	0	1.36666	0	0	0	0	0	0
		68000-68999	0	0	0	0	0	0	0	0	0	1.36666	0	0	0	0	0	0	0	0	0	0	0	0	0	0	1.36666	1.36666	0	0	2.73332	1.36666	0	0	0	0	0	0	0	0	0	0	0	0	0	0	0	1.36666	1.36666
		67000-67999	0	0	0	0	0	0	1.36666	0	1.36666	0	0	0	0	0	0	0	0	0	0	0	0	0	0	0	0	0	0	0	0	0	0	0	0	0	0	1.36666	0	0	1.36666	0	0	0	0	0	0	0	0
		66000-66999	0	0	0	0	0	1.36666	0	0	0	0	0	0	0	0	0	0	0	0	0	0	2.73332	1.36666	1.36666	0	0	0	0	0	1.36666	0	0	0	2.73332	0	0	0	0	0	0	0	0	1.36666	0	0	0	0	1.36666
		65000-65999	0	0	0	0	0	0	0	0	0	0	0	0	0	0	0	0	0	2.73332	0	0	0	0	0	0	0	0	0	0	0	0	0	0	0	1.36666	0	0	0	0	0	0	0	0	0	0	0	0	0
		64000-64999	0	0	0	0	0	0	0	0	0	0	0	0	0	1.36666	0	0	0	0	0	0	0	0	0	0	0	0	0	0	1.36666	0	0	0	0	2.73332	0	0	0	0	0	0	0	0	0	0	1.36666	0	0
		63000-63999	0	0	0	0	0	0	0	0	0	0	0	0	0	0	0	0	0	0	0	0	0	0	0	0	0	0	0	0	0	0	0	0	1.36666	0	0	0	0	0	0	0	0	0	0	0	0	1.36666	0
		62000-62999	0	0	0	0	0	1.36666	0	0	0	0	0	0	0	0	0	0	0	0	1.36666	0	0	0	0	2.73332	0	0	0	0	1.36666	1.36666	0	0	0	0	0	0	0	0	0	0	0	0	0	0	1.36666	0	0
		61000-61999	0	0	0	0	0	1.36666	1.36666	0	0	0	0	0	0	0	0	0	0	0	0	0	0	0	0	0	0	0	0	0	0	0	0	0	0	0	0	1.36666	0	0	1.36666	0	0	0	0	0	0	0	0
		60000-60999	1.36666	0	0	0	0	0	0	0	0	0	0	0	0	2.73332	1.36666	1.36666	0	0	0	0	0	0	0	0	0	0	0	0	0	0	0	0	0	0	0	0	0	0	0	0	0	0	1.36666	1.36666	0	0	0
		59000-59999	0	0	0	0	0	0	0	0	0	0	0	1.36666	0	0	0	0	0	0	0	0	0	0	0	1.36666	0	0	0	0	0	0	0	0	0	0	0	0	0	0	0	0	0	0	0	0	0	0	1.36666
		58000-58999	0	0	0	0	0	0	0	0	0	0	0	0	0	0	0	0	0	0	1.36666	0	0	0	0	0	0	0	1.36666	0	0	0	0	0	0	2.73332	0	0	0	0	0	0	0	0	0	0	0	0	0
		57000-57999	0	0	0	0	0	0	0	0	0	0	0	0	1.36666	0	1.36666	0	0	0	0	0	1.36666	0	0	0	0	1.36666	0	1.36666	0	0	2.73332	0	0	0	0	0	0	0	0	0	0	0	1.36666	0	0	0	0
		56000-56999	0	0	0	0	0	0	0	0	1.36666	0	0	0	0	1.36666	0	0	2.73332	0	0	0	0	0	1.36666	0	0	0	0	0	0	0	0	0	0	0	0	0	0	0	0	0	0	0	0	0	0	0	0
		55000-55999	0	0	0	0	0	0	0	0	0	1.36666	0	1.36666	1.36666	0	0	0	0	0	0	0	0	0	0	0	0	0	0	0	0	1.36666	0	0	1.36666	0	0	0	1.36666	0	1.36666	0	0	0	0	0	0	0	0
		54000-54999	0	0	0	1.36666	0	1.36666	1.36666	0	0	0	0	0	0	0	0	1.36666	0	0	0	0	0	0	0	0	0	0	0	0	0	0	0	0	0	0	0	0	0	0	0	1.36666	0	0	0	0	0	0	1.36666
		53000-53999	1.36666	0	0	0	0	0	0	0	0	0	0	0	0	0	0	0	1.36666	0	0	0	0	0	0	1.36666	1.36666	0	0	0	0	0	0	0	0	0	1.36666	1.36666	0	0	0	0	0	0	0	1.36666	0	0	0
		52000-52999	0	0	0	0	0	0	0	0	0	0	0	0	0	0	0	0	0	0	0	0	0	0	0	0	0	0	0	0	0	0	0	0	0	0	0	0	0	0	0	0	0	0	1.36666	0	0	0	0
		51000-51999	0	0	0	0	1.36666	0	0	0	0	0	0	0	0	0	0	0	1.36666	0	0	0	1.36666	0	1.36666	0	0	0	0	0	0	1.36666	0	0	0	1.36666	1.36666	0	0	2.73332	0	0	0	0	0	0	0	0	0
		50000-50999	0	0	0	0	1.36666	0	0	0	0	1.36666	0	0	0	0	1.36666	0	0	1.36666	2.73332	0	0	0	0	0	0	0	2.73332	0	0	0	0	0	0	2.73332	0	0	0	0	0	0	1.36666	1.36666	0	0	0	0	1.36666
		49000-49999	0	0	0	0	1.36666	0	0	0	0	1.36666	0	1.36666	0	0	0	1.36666	0	0	0	0	0	0	1.36666	0	1.36666	0	0	0	1.36666	0	0	0	0	0	0	0	1.36666	0	1.36666	0	0	0	0	0	1.36666	0	0
		48000-48999	0	0	0	1.36666	0	0	0	0	0	0	0	1.36666	0	0	2.73332	0	0	0	0	0	0	0	0	0	0	0	0	1.36666	0	0	0	0	0	1.36666	1.36666	0	0	0	1.36666	0	0	0	0	0	0	0	2.73332
		47000-47999	0	0	0	0	0	0	0	0	0	0	0	0	0	1.36666	0	0	0	0	0	0	0	1.36666	0	0	0	0	0	0	0	0	1.36666	0	0	0	0	1.36666	0	0	0	0	0	0	0	1.36666	0	0	0
		46000-46999	0	0	0	0	1.36666	0	0	0	0	0	0	0	0	0	1.36666	0	0	0	0	0	0	0	0	0	0	1.36666	0	0	0	0	5.46665	2.73332	0	1.36666	0	0	0	0	0	0	1.36666	0	0	0	1.36666	1.36666	9.56664
		45000-45999	0	0	0	0	0	0	0	0	0	0	0	0	0	0	0	0	0	0	0	0	0	0	0	0	0	0	0	0	0	0	0	0	0	0	0	0	0	0	0	0	0	0	1.36666	0	0	16.3999
		44000-44999	0	0	0	0	1.36666	0	0	0	0	0	0	0	0	0	0	0	0	0	0	0	0	0	0	0	0	0	0	2.73332	0	0	0	0	1.36666	0	0	1.36666	0	1.36666	0	0	0	0	0	0	4.09999
		43000-43999	0	0	0	0	0	0	0	0	0	0	0	0	0	1.36666	0	0	2.73332	0	0	0	1.36666	0	0	0	0	0	0	0	0	0	2.73332	0	0	0	0	0	0	0	0	0	0	0	0	9.56664
		42000-42999	0	2.73332	1.36666	0	0	0	0	0	0	0	0	0	1.36666	0	0	0	0	0	0	0	1.36666	0	0	1.36666	0	0	0	0	0	0	0	0	0	0	0	0	0	0	0	0	1.36666	0	8.19997
		41000-41999	0	0	0	0	0	0	0	0	0	0	0	0	0	0	1.36666	0	0	0	0	0	0	0	0	0	0	0	0	0	1.36666	0	0	0	0	0	0	0	1.36666	0	2.73332	0	0	8.19997
		40000-40999	0	0	0	0	0	0	0	0	0	0	0	0	0	0	0	0	0	0	0	0	0	0	0	1.36666	0	2.73332	0	0	0	0	0	0	0	1.36666	0	0	0	0	1.36666	0	10.9333
		39000-39999	0	2.73332	0	0	0	0	1.36666	2.73332	0	0	0	1.36666	0	0	0	1.36666	0	0	1.36666	0	0	0	0	0	0	0	0	0	0	0	0	0	0	0	0	1.36666	0	1.36666	1.36666	10.9333
		38000-38999	0	0	0	0	0	0	0	0	0	1.36666	0	0	0	0	0	0	1.36666	1.36666	0	0	0	0	0	0	0	0	0	1.36666	0	0	0	0	1.36666	0	1.36666	0	0	0	9.56664
		37000-37999	0	0	1.36666	0	0	1.36666	0	0	0	0	0	0	1.36666	0	0	0	0	0	0	0	1.36666	0	0	0	0	0	0	0	0	0	0	0	0	0	0	0	0	4.09999
		36000-36999	0	0	0	0	0	1.36666	0	0	0	0	0	0	0	0	0	0	0	0	0	0	0	0	0	0	0	0	0	0	0	0	0	0	0	1.36666	0	4.09999	10.9333
		35000-35999	0	0	0	0	0	0	0	0	1.36666	0	0	1.36666	0	0	0	0	0	1.36666	0	0	0	0	0	0	0	0	0	0	0	0	1.36666	0	0	0	1.36666	4.09999
		34000-34999	0	0	0	0	0	0	0	0	1.36666	0	0	0	0	0	0	1.36666	0	0	0	0	0	1.36666	0	0	0	1.36666	0	0	0	0	0	0	0	1.36666	4.09999
		33000-33999	2.73332	0	0	0	0	0	0	0	0	0	0	0	0	1.36666	0	0	0	0	0	0	0	1.36666	0	0	0	0	0	0	0	0	0	0	1.36666	4.09999
		32000-32999	0	0	0	1.36666	0	0	0	0	1.36666	0	0	0	0	0	0	0	0	0	0	0	0	0	0	0	0	0	0	0	1.36666	0	0	0	5.46665
		31000-31999	0	0	0	0	0	0	2.73332	1.36666	0	1.36666	0	0	0	0	0	0	0	0	0	0	0	0	0	0	0	0	1.36666	0	0	0	5.46665	1.36666
		30000-30999	0	0	0	0	1.36666	0	1.36666	0	0	0	0	0	0	0	0	0	0	0	0	0	1.36666	0	0	0	0	1.36666	0	0	2.73332	2.73332	10.9333
		29000-29999	0	0	0	0	1.36666	0	0	0	0	0	0	0	0	1.36666	0	0	0	1.36666	0	0	0	0	0	0	0	0	0	0	0	4.09999
		28000-28999	0	0	0	0	0	0	0	2.73332	2.73332	0	0	0	0	0	0	0	0	0	0	2.73332	0	0	0	0	0	1.36666	0	0	5.46665
		27000-27999	0	0	1.36666	0	0	0	0	0	0	0	0	0	0	0	1.36666	0	0	0	0	0	0	0	0	0	1.36666	1.36666	1.36666	6.83331
		26000-26999	0	0	0	0	1.36666	0	0	1.36666	0	0	0	0	0	0	0	0	0	1.36666	0	0	1.36666	1.36666	0	0	0	2.73332	15.0333
		25000-25999	0	0	0	0	0	0	0	0	0	0	1.36666	0	0	0	0	0	0	0	0	0	0	0	0	0	0	6.83331
		24000-24999	0	0	0	0	0	0	0	0	0	0	1.36666	0	0	0	0	0	0	0	0	0	0	0	0	5.46665	4.09999
		23000-23999	0	0	0	0	0	0	1.36666	1.36666	0	0	0	0	1.36666	0	0	0	0	0	0	2.73332	1.36666	0	1.36666	6.83331
		22000-22999	0	1.36666	0	0	0	0	1.36666	0	0	0	0	0	0	0	0	0	0	0	0	0	0	2.73332	13.6666
		21000-21999	0	0	1.36666	0	0	0	0	2.73332	0	0	0	0	2.73332	0	0	0	0	0	0	0	0	15.0333
		20000-20999	1.36666	0	0	2.73332	0	0	0	0	0	0	0	0	1.36666	0	0	2.73332	0	0	0	2.73332	9.56664
		19000-19999	1.36666	2.73332	0	0	0	0	0	0	0	0	0	0	0	0	1.36666	0	0	0	0	4.09999
		18000-18999	0	0	0	0	0	0	1.36666	0	0	0	0	0	0	0	0	0	0	1.36666	10.9333
		17000-17999	0	1.36666	0	0	0	0	0	0	0	0	0	1.36666	0	0	0	0	0	8.19997
		16000-16999	0	0	0	0	0	0	2.73332	0	0	0	0	0	0	0	0	1.36666	16.3999
		15000-15999	0	0	1.36666	0	0	0	0	0	0	0	0	0	0	0	1.36666	4.09999
		14000-14999	1.36666	1.36666	0	1.36666	0	0	0	0	0	0	0	0	0	2.73332	4.09999
		13000-13999	0	0	0	0	0	1.36666	0	0	0	0	0	0	0	4.09999
		12000-12999	0	0	0	0	0	0	0	0	0	0	0	5.46665	9.56664
		11000-11999	0	1.36666	0	0	0	0	1.36666	0	0	0	4.09999	10.9333
		10000-10999	0	0	0	1.36666	0	0	1.36666	0	0	2.73332	17.7666
		9000-9999	0	1.36666	0	0	0	0	1.36666	0	1.36666	13.6666
		8000-8999	0	0	0	0	0	0	0	4.09999	16.3999
		7000-7999	0	0	0	1.36666	0	0	5.46665	6.83331
		6000-6999	0	0	0	0	1.36666	1.36666	2.73332
		5000-5999	0	0	0	0	1.36666	13.6666
		4000-4999	0	1.36666	1.36666	0	12.3
		3000-3999	0	0	0	6.83331
		2000-2999	0	0	10.9333
		1000-1999	1.36666	12.3
		0-999	19.1333
[truncated: 82 more columns]

## Sheet: Supp. Table S19
Rearrangement junctions per position per 10000 plastid genomes in A. thaliana why1why3
Organism		Genome Positions	0-999	1000-1999	2000-2999	3000-3999	4000-4999	5000-5999	6000-6999	7000-7999	8000-8999	9000-9999	10000-10999	11000-11999	12000-12999	13000-13999	14000-14999	15000-15999	16000-16999	17000-17999	18000-18999	19000-19999	20000-20999	21000-21999	22000-22999	23000-23999	24000-24999	25000-25999	26000-26999	27000-27999	28000-28999	29000-29999	30000-30999	31000-31999	32000-32999	33000-33999	34000-34999	35000-35999	36000-36999	37000-37999	38000-38999	39000-39999	40000-40999	41000-41999	42000-42999	43000-43999	44000-44999	45000-45999	46000-46999
A.thaliana		128000-128214	0	0	0	0	0	0	0	0	0	0	0	0	0	0	0	0	0	0	0	0	0	0	0	0	0	0	0	0	0	0	0	0	0	0	0	0	0	0	0	0	0	0	2.50497	0	0	0	0
Genome		127000-127999	0	0	0	1.25249	1.25249	0	1.25249	2.50497	0	0	0	0	0	0	5.00995	0	0	1.25249	0	2.50497	1.25249	0	0	0	0	0	0	0	0	1.25249	3.75746	1.25249	10.0199	0	0	0	1.25249	1.25249	0	0	0	0	0	0	0	0	1.25249
Plastid		126000-126999	0	1.25249	0	0	0	0	0	1.25249	0	1.25249	0	0	0	0	0	0	0	0	2.50497	0	0	1.25249	0	0	0	0	0	1.25249	0	0	0	0	0	0	0	1.25249	3.75746	1.25249	0	0	0	0	2.50497	0	1.25249	0	0
Line		125000-125999	0	0	0	0	1.25249	0	1.25249	0	0	0	1.25249	0	1.25249	1.25249	0	0	0	0	0	0	0	0	0	0	0	1.25249	0	0	0	0	1.25249	1.25249	0	1.25249	0	0	1.25249	3.75746	0	0	2.50497	0	0	0	1.25249	0	1.25249
Col-0		124000-124999	0	0	0	0	0	3.75746	2.50497	1.25249	0	0	0	0	1.25249	1.25249	0	0	0	0	0	0	0	0	0	0	0	0	1.25249	0	1.25249	1.25249	0	0	1.25249	0	0	0	0	0	0	1.25249	0	2.50497	0	0	5.00995	0	1.25249
Mutations		123000-123999	2.50497	0	0	0	1.25249	2.50497	0	0	1.25249	1.25249	0	0	0	0	0	0	0	1.25249	0	0	0	0	0	1.25249	0	0	1.25249	3.75746	0	0	0	1.25249	0	1.25249	0	0	0	0	2.50497	0	1.25249	0	0	0	0	1.25249	0
why1why3		122000-122999	1.25249	0	0	0	0	0	0	0	0	0	0	0	0	0	0	1.25249	0	1.25249	0	1.25249	0	0	0	0	3.75746	0	0	0	1.25249	0	0	0	1.25249	0	0	2.50497	0	1.25249	0	0	1.25249	1.25249	2.50497	0	1.25249	0	0
Total Reads		121000-121999	0	0	0	0	1.25249	0	0	2.50497	0	1.25249	0	0	1.25249	0	1.25249	0	0	0	0	0	0	1.25249	0	0	0	1.25249	1.25249	0	0	0	0	5.00995	1.25249	0	0	0	0	0	0	0	0	0	0	0	1.25249	0	0
12333704		120000-120999	1.25249	0	0	0	7.51492	0	1.25249	0	0	0	0	1.25249	0	0	1.25249	0	0	0	0	2.50497	0	2.50497	0	0	0	0	0	0	0	0	0	0	1.25249	0	1.25249	1.25249	0	0	1.25249	0	1.25249	0	0	0	0	1.25249	1.25249
Total Bases		119000-119999	1.25249	0	1.25249	0	0	0	0	1.25249	0	3.75746	0	0	0	0	0	0	0	0	0	0	0	0	0	0	0	0	0	0	0	1.25249	0	2.50497	0	0	0	0	0	0	0	0	0	0	2.50497	0	0	0	0
1233370400		118000-118999	0	0	0	0	1.25249	1.25249	5.00995	1.25249	0	0	1.25249	1.25249	1.25249	0	1.25249	0	1.25249	2.50497	0	0	0	0	0	1.25249	0	1.25249	0	0	1.25249	0	1.25249	0	1.25249	0	0	0	0	1.25249	1.25249	0	0	0	0	0	0	2.50497	0
Genome Size		117000-117999	0	0	0	0	0	0	0	0	0	1.25249	0	0	1.25249	0	0	0	0	0	0	0	0	0	0	5.00995	0	0	0	0	0	0	1.25249	0	0	0	1.25249	1.25249	0	2.50497	0	0	0	0	0	0	0	0	0
154478		116000-116999	1.25249	1.25249	1.25249	2.50497	0	0	1.25249	0	1.25249	0	1.25249	0	0	0	0	0	1.25249	0	0	0	0	1.25249	1.25249	1.25249	0	0	0	0	0	1.25249	0	0	0	1.25249	0	0	0	0	0	0	1.25249	0	0	0	0	1.25249	1.25249
Multiplier		115000-115999	0	1.25249	0	0	0	0	0	0	1.25249	0	0	0	0	0	1.25249	1.25249	2.50497	0	1.25249	1.25249	0	0	0	0	0	0	0	1.25249	1.25249	0	2.50497	0	0	0	0	1.25249	1.25249	0	1.25249	2.50497	0	0	0	1.25249	1.25249	1.25249	1.25249
1.25249		114000-114999	0	0	1.25249	0	0	0	0	0	0	0	0	0	0	0	2.50497	0	1.25249	0	0	1.25249	1.25249	0	0	0	1.25249	1.25249	2.50497	1.25249	1.25249	0	0	0	0	0	0	1.25249	0	1.25249	0	0	0	0	1.25249	0	1.25249	0	0
		113000-113999	0	0	0	0	0	0	0	0	0	0	0	0	0	0	0	0	0	0	0	1.25249	0	0	1.25249	0	0	1.25249	2.50497	1.25249	3.75746	0	2.50497	1.25249	2.50497	0	0	2.50497	0	0	0	0	0	0	1.25249	0	0	1.25249	0
Color Scale		112000-112999	0	0	0	0	2.50497	0	2.50497	0	0	0	0	0	1.25249	0	0	0	1.25249	0	0	0	0	1.25249	2.50497	2.50497	1.25249	1.25249	0	0	0	0	0	5.00995	0	1.25249	0	0	0	0	0	0	0	1.25249	1.25249	0	0	0	1.25249
0		111000-111999	0	0	0	1.25249	0	1.25249	1.25249	0	0	0	2.50497	1.25249	0	0	0	0	0	1.25249	1.25249	0	0	0	0	5.00995	0	2.50497	0	0	1.25249	2.50497	0	1.25249	0	0	0	0	0	0	0	1.25249	1.25249	2.50497	0	0	0	0	1.25249
1		110000-110999	0	0	0	1.25249	1.25249	0	1.25249	1.25249	0	2.50497	0	2.50497	0	1.25249	2.50497	2.50497	0	0	0	0	2.50497	0	1.25249	0	0	1.25249	0	0	0	0	1.25249	1.25249	1.25249	0	0	1.25249	0	0	0	0	0	1.25249	2.50497	0	2.50497	0	0
2		109000-109999	5.00995	2.50497	0	0	0	2.50497	1.25249	1.25249	0	0	0	0	0	2.50497	0	1.25249	0	0	0	0	0	3.75746	2.50497	0	1.25249	0	1.25249	1.25249	1.25249	0	1.25249	0	2.50497	2.50497	0	3.75746	0	0	0	2.50497	0	0	1.25249	0	0	0	0
3		108000-108999	0	0	0	1.25249	0	0	0	1.25249	2.50497	2.50497	0	0	0	1.25249	1.25249	2.50497	0	0	0	0	0	2.50497	0	0	0	0	1.25249	1.25249	0	1.25249	0	0	0	0	0	1.25249	1.25249	1.25249	0	0	3.75746	1.25249	1.25249	0	0	2.50497	1.25249
4		107000-107999	1.25249	0	2.50497	0	0	1.25249	0	2.50497	0	0	1.25249	0	0	0	0	1.25249	0	0	0	0	0	0	2.50497	0	1.25249	0	0	0	0	0	3.75746	0	0	1.25249	0	1.25249	0	0	0	0	0	0	0	0	1.25249	0	0
5		106000-106999	0	2.50497	1.25249	0	0	1.25249	2.50497	0	1.25249	0	0	0	0	1.25249	1.25249	0	0	0	1.25249	0	0	2.50497	0	0	1.25249	5.00995	0	0	0	0	0	0	0	0	0	2.50497	0	0	0	1.25249	0	0	1.25249	0	0	0	0
6		105000-105999	0	0	0	0	0	0	0	0	0	0	0	0	0	0	0	1.25249	0	0	0	0	0	0	2.50497	0	1.25249	1.25249	0	0	0	0	0	0	1.25249	1.25249	0	0	0	0	1.25249	0	0	1.25249	0	1.25249	0	1.25249	0
7		104000-104999	1.25249	0	0	0	0	0	0	1.25249	0	1.25249	0	0	0	1.25249	2.50497	0	0	0	0	1.25249	0	1.25249	0	0	0	0	0	0	0	0	0	0	0	0	0	0	0	0	0	0	0	2.50497	0	0	0	1.25249	0
8		103000-103999	1.25249	0	1.25249	0	0	0	0	1.25249	1.25249	0	0	0	0	3.75746	0	1.25249	0	0	1.25249	1.25249	0	0	1.25249	2.50497	0	0	2.50497	0	0	0	0	0	0	0	0	0	0	0	0	0	0	0	0	0	0	0	1.25249
9		102000-102999	0	1.25249	0	0	0	0	3.75746	1.25249	0	1.25249	0	0	0	2.50497	0	0	0	0	1.25249	0	0	1.25249	0	2.50497	0	1.25249	0	0	0	1.25249	0	0	0	5.00995	0	0	0	0	0	0	0	1.25249	0	0	1.25249	0	0
10		101000-101999	0	0	0	0	0	0	0	1.25249	1.25249	0	5.00995	0	0	0	0	0	0	0	0	0	0	1.25249	1.25249	0	1.25249	0	0	1.25249	0	0	2.50497	0	0	0	0	0	1.25249	2.50497	0	0	0	2.50497	0	0	0	0	0
11		100000-100999	0	1.25249	1.25249	2.50497	2.50497	1.25249	1.25249	0	0	1.25249	0	1.25249	1.25249	0	1.25249	0	1.25249	0	1.25249	0	0	1.25249	0	0	0	0	0	2.50497	2.50497	0	0	0	0	0	1.25249	1.25249	0	0	0	0	0	0	1.25249	0	0	1.25249	0
12		99000-99999	0	0	0	0	0	1.25249	0	0	0	1.25249	0	0	0	1.25249	1.25249	0	1.25249	1.25249	0	0	1.25249	0	0	0	0	0	0	1.25249	0	0	0	1.25249	0	0	1.25249	0	0	1.25249	1.25249	0	0	0	0	1.25249	0	0	2.50497
13		98000-98999	2.50497	1.25249	0	0	6.26243	0	1.25249	0	1.25249	0	0	0	0	2.50497	2.50497	0	0	0	0	0	0	1.25249	0	0	0	0	0	0	0	1.25249	1.25249	0	0	1.25249	0	0	0	0	0	0	0	0	0	0	0	1.25249	1.25249
14		97000-97999	1.25249	1.25249	1.25249	0	0	2.50497	1.25249	0	0	0	0	0	0	0	0	0	1.25249	0	1.25249	3.75746	2.50497	1.25249	1.25249	0	0	0	2.50497	3.75746	0	1.25249	0	1.25249	0	2.50497	0	2.50497	1.25249	0	1.25249	0	0	0	1.25249	0	1.25249	0	5.00995
15		96000-96999	2.50497	1.25249	0	2.50497	0	0	3.75746	0	0	0	0	1.25249	1.25249	0	0	0	0	1.25249	0	0	0	0	1.25249	0	0	0	0	0	0	3.75746	2.50497	0	1.25249	0	5.00995	0	1.25249	0	0	0	0	0	1.25249	0	1.25249	2.50497	0
		95000-95999	1.25249	2.50497	0	0	1.25249	1.25249	0	1.25249	0	0	0	0	0	1.25249	0	1.25249	2.50497	0	0	0	1.25249	1.25249	0	1.25249	0	0	0	0	0	0	0	1.25249	0	0	0	0	2.50497	0	2.50497	0	1.25249	0	1.25249	1.25249	0	0	0
		94000-94999	0	0	0	3.75746	0	0	0	1.25249	0	0	1.25249	0	0	0	1.25249	0	0	1.25249	2.50497	0	0	2.50497	0	0	0	2.50497	1.25249	0	1.25249	1.25249	0	0	1.25249	1.25249	0	1.25249	1.25249	0	0	2.50497	1.25249	0	0	0	0	1.25249	1.25249
		93000-93999	1.25249	1.25249	0	1.25249	1.25249	2.50497	0	0	1.25249	0	2.50497	1.25249	1.25249	0	1.25249	2.50497	0	0	0	2.50497	0	0	0	3.75746	1.25249	2.50497	0	0	0	1.25249	0	0	0	2.50497	0	2.50497	0	1.25249	1.25249	0	0	0	0	1.25249	3.75746	1.25249	0
		92000-92999	0	0	0	1.25249	0	0	0	0	0	0	1.25249	0	1.25249	2.50497	3.75746	2.50497	2.50497	0	0	1.25249	0	0	1.25249	0	0	0	0	0	0	0	0	0	1.25249	0	0	3.75746	0	0	0	0	1.25249	0	0	0	1.25249	0	1.25249
		91000-91999	0	0	0	1.25249	2.50497	3.75746	0	1.25249	2.50497	0	2.50497	0	0	1.25249	0	0	0	2.50497	0	0	0	1.25249	0	2.50497	0	0	3.75746	1.25249	0	0	0	0	0	0	0	0	1.25249	1.25249	3.75746	0	1.25249	0	0	0	0	2.50497	0
		90000-90999	0	2.50497	0	2.50497	1.25249	0	1.25249	1.25249	0	0	0	3.75746	0	0	1.25249	1.25249	0	3.75746	0	0	0	0	0	3.75746	0	1.25249	1.25249	0	0	0	0	1.25249	0	0	0	0	0	0	0	0	1.25249	0	0	1.25249	2.50497	0	0
		89000-89999	0	0	1.25249	0	0	2.50497	0	1.25249	0	1.25249	0	0	0	0	0	0	1.25249	0	0	0	1.25249	0	0	3.75746	0	1.25249	0	1.25249	2.50497	3.75746	2.50497	0	1.25249	0	0	3.75746	0	0	1.25249	0	0	0	0	5.00995	0	1.25249	0
		88000-88999	1.25249	3.75746	0	0	1.25249	0	5.00995	0	0	0	1.25249	0	0	0	0	0	0	0	2.50497	0	0	1.25249	5.00995	1.25249	0	2.50497	0	0	0	0	0	0	0	0	0	3.75746	2.50497	0	7.51492	0	1.25249	0	0	1.25249	0	1.25249	2.50497
		87000-87999	1.25249	0	1.25249	2.50497	0	1.25249	0	1.25249	0	0	2.50497	0	0	0	0	0	0	1.25249	0	0	1.25249	0	1.25249	0	0	0	0	0	0	0	1.25249	1.25249	0	0	0	0	0	1.25249	0	0	2.50497	0	0	1.25249	3.75746	0	0
		86000-86999	0	0	1.25249	0	0	0	0	1.25249	0	1.25249	0	0	0	0	0	0	0	0	0	0	2.50497	0	1.25249	0	0	0	1.25249	1.25249	1.25249	0	0	0	1.25249	0	1.25249	0	0	3.75746	0	1.25249	0	1.25249	0	1.25249	0	0	0
		85000-85999	2.50497	0	0	1.25249	0	0	0	0	1.25249	2.50497	1.25249	0	0	1.25249	0	0	0	0	0	0	0	2.50497	0	0	0	0	1.25249	0	0	0	0	3.75746	1.25249	1.25249	0	0	0	0	0	2.50497	1.25249	0	0	0	0	0	0
		84000-84999	15.0298	2.50497	1.25249	1.25249	1.25249	0	0	0	0	0	0	0	0	1.25249	0	0	0	0	1.25249	0	2.50497	0	2.50497	0	0	0	0	0	0	0	1.25249	23.7972	1.25249	0	1.25249	0	1.25249	1.25249	0	0	1.25249	0	0	3.75746	0	2.50497	0
		83000-83999	0	0	0	0	0	1.25249	1.25249	1.25249	0	0	0	0	1.25249	0	0	0	0	1.25249	1.25249	0	0	0	0	0	0	0	1.25249	0	0	2.50497	0	0	0	1.25249	0	0	2.50497	0	0	0	0	0	0	1.25249	0	1.25249	0
		82000-82999	1.25249	1.25249	0	0	1.25249	0	0	0	1.25249	0	0	0	1.25249	0	0	0	0	2.50497	0	1.25249	1.25249	0	1.25249	0	0	0	0	0	0	0	5.00995	0	0	0	0	0	1.25249	0	0	1.25249	0	0	0	0	1.25249	1.25249	7.51492
		81000-81999	0	0	2.50497	0	3.75746	1.25249	1.25249	0	0	0	0	0	1.25249	1.25249	2.50497	1.25249	0	1.25249	0	0	0	0	0	1.25249	1.25249	0	1.25249	1.25249	0	0	0	0	1.25249	0	0	0	0	1.25249	0	0	0	1.25249	0	0	0	0	1.25249
		80000-80999	0	0	0	0	0	2.50497	0	0	0	0	0	0	0	1.25249	0	0	0	0	1.25249	0	0	0	0	0	0	1.25249	0	0	0	0	0	1.25249	0	1.25249	0	0	0	0	0	0	0	0	0	0	0	1.25249	0
		79000-79999	0	0	0	0	0	0	0	0	0	2.50497	0	0	0	0	0	0	0	0	0	2.50497	1.25249	0	1.25249	0	0	0	0	0	1.25249	0	0	0	0	0	0	0	0	0	0	0	0	1.25249	0	0	0	0	0
		78000-78999	0	0	0	0	0	0	0	0	1.25249	0	1.25249	0	0	1.25249	2.50497	0	0	0	0	0	1.25249	0	0	0	0	0	0	0	0	0	1.25249	1.25249	0	0	0	0	1.25249	0	0	1.25249	0	0	0	0	1.25249	0	1.25249
		77000-77999	0	0	0	0	0	0	0	0	0	1.25249	0	0	0	0	0	1.25249	0	0	0	0	0	0	0	1.25249	0	0	0	1.25249	1.25249	0	0	1.25249	0	0	1.25249	1.25249	1.25249	0	0	0	0	0	0	0	1.25249	0	0
		76000-76999	1.25249	0	1.25249	0	1.25249	0	0	0	0	0	2.50497	2.50497	0	1.25249	0	0	1.25249	0	0	1.25249	0	0	0	0	0	1.25249	0	0	1.25249	0	0	0	0	0	0	0	0	1.25249	0	0	0	0	0	0	2.50497	0	0
		75000-75999	0	0	0	0	0	0	1.25249	1.25249	1.25249	0	0	0	0	1.25249	0	1.25249	0	0	0	1.25249	0	0	1.25249	0	1.25249	1.25249	2.50497	1.25249	0	1.25249	1.25249	2.50497	0	0	0	0	0	0	0	0	0	0	0	0	1.25249	0	1.25249
		74000-74999	0	0	0	0	0	0	0	0	0	0	0	0	0	0	0	0	0	0	0	0	1.25249	0	1.25249	1.25249	0	0	1.25249	0	0	1.25249	0	0	1.25249	0	0	0	0	0	0	0	1.25249	1.25249	0	0	1.25249	0	0
		73000-73999	0	0	0	0	0	0	1.25249	0	0	0	0	0	0	0	1.25249	0	0	0	0	0	0	0	0	0	0	0	2.50497	0	0	0	0	0	1.25249	0	0	1.25249	0	0	0	0	2.50497	0	0	0	0	0	0
		72000-72999	0	0	0	1.25249	0	0	0	0	0	0	1.25249	0	0	2.50497	5.00995	1.25249	0	0	1.25249	0	1.25249	0	1.25249	0	0	0	0	0	2.50497	0	0	1.25249	0	0	0	0	0	2.50497	0	0	0	0	0	0	0	0	0
		71000-71999	0	2.50497	0	0	0	1.25249	0	1.25249	0	2.50497	0	0	0	0	2.50497	0	0	1.25249	0	0	0	0	0	1.25249	1.25249	0	0	1.25249	0	0	0	5.00995	0	1.25249	0	0	0	1.25249	0	0	1.25249	0	2.50497	0	1.25249	0	0
		70000-70999	0	0	0	1.25249	0	0	1.25249	1.25249	0	0	1.25249	0	2.50497	1.25249	1.25249	0	0	0	0	0	0	0	0	0	0	0	0	1.25249	0	1.25249	0	1.25249	5.00995	0	0	0	3.75746	0	0	0	0	0	1.25249	1.25249	0	2.50497	1.25249
		69000-69999	0	0	0	1.25249	0	1.25249	2.50497	0	0	0	0	0	0	0	0	0	0	0	0	0	0	0	1.25249	0	0	0	0	0	0	0	0	2.50497	0	0	0	1.25249	0	0	0	0	1.25249	0	0	1.25249	0	0	0
		68000-68999	0	0	0	0	0	3.75746	1.25249	0	0	0	0	0	1.25249	0	2.50497	0	0	1.25249	0	0	0	0	1.25249	1.25249	1.25249	0	2.50497	0	1.25249	0	0	0	2.50497	0	0	0	0	2.50497	0	1.25249	0	0	0	0	0	0	1.25249
		67000-67999	0	0	0	0	0	0	0	1.25249	0	2.50497	0	0	1.25249	0	1.25249	0	1.25249	0	0	0	0	1.25249	0	1.25249	0	0	0	0	0	0	0	1.25249	0	0	1.25249	0	0	0	0	0	0	0	0	0	2.50497	0	0
		66000-66999	0	0	0	0	0	0	0	1.25249	0	1.25249	0	0	0	0	0	0	1.25249	0	1.25249	0	0	0	0	0	1.25249	0	0	0	0	1.25249	0	0	0	0	0	0	5.00995	0	0	1.25249	0	0	1.25249	0	0	3.75746	2.50497
		65000-65999	0	0	0	0	1.25249	0	0	2.50497	0	0	0	1.25249	0	0	0	0	0	0	0	0	0	0	0	0	0	1.25249	0	1.25249	0	0	2.50497	1.25249	1.25249	1.25249	0	0	2.50497	0	2.50497	0	0	0	2.50497	1.25249	1.25249	3.75746	1.25249
		64000-64999	0	0	0	1.25249	0	0	0	0	0	2.50497	1.25249	0	0	1.25249	5.00995	0	0	0	0	1.25249	0	0	0	2.50497	0	1.25249	0	0	1.25249	0	0	0	0	0	0	1.25249	0	0	0	0	0	1.25249	0	1.25249	0	2.50497	0
		63000-63999	2.50497	1.25249	0	0	3.75746	1.25249	1.25249	0	2.50497	0	0	0	1.25249	0	0	0	0	0	0	0	0	0	0	1.25249	0	0	0	0	0	0	0	0	0	0	1.25249	0	1.25249	0	0	0	0	1.25249	0	0	0	1.25249	0
		62000-62999	0	0	1.25249	1.25249	0	0	0	0	0	0	0	1.25249	0	1.25249	1.25249	0	0	0	0	0	0	3.75746	0	0	1.25249	0	0	0	0	0	1.25249	0	0	0	0	0	0	0	0	0	0	0	0	0	0	0	0
		61000-61999	0	0	2.50497	0	0	1.25249	1.25249	1.25249	0	0	0	0	0	0	2.50497	0	0	0	0	0	1.25249	1.25249	1.25249	0	0	0	0	1.25249	0	0	0	0	1.25249	0	0	0	0	0	0	0	1.25249	1.25249	0	3.75746	0	0	0
		60000-60999	0	0	2.50497	0	1.25249	1.25249	0	1.25249	0	0	0	1.25249	0	0	0	1.25249	0	0	0	0	1.25249	1.25249	0	0	0	0	1.25249	2.50497	0	1.25249	0	0	0	0	0	0	0	0	0	0	0	0	0	0	0	0	1.25249
		59000-59999	1.25249	1.25249	0	0	0	0	0	0	0	3.75746	0	0	0	1.25249	0	0	1.25249	0	0	0	0	0	0	0	1.25249	0	0	0	1.25249	6.26243	1.25249	0	0	0	0	1.25249	1.25249	0	0	0	3.75746	1.25249	0	0	0	1.25249	2.50497
		58000-58999	0	1.25249	0	1.25249	0	1.25249	1.25249	0	0	1.25249	0	0	1.25249	2.50497	0	1.25249	1.25249	0	0	0	0	0	0	0	0	0	0	0	1.25249	1.25249	1.25249	3.75746	1.25249	0	0	0	1.25249	0	0	1.25249	0	0	0	1.25249	0	0	0
		57000-57999	0	0	0	2.50497	0	0	1.25249	0	1.25249	0	0	1.25249	0	1.25249	0	1.25249	0	1.25249	0	3.75746	0	1.25249	3.75746	0	0	0	0	0	0	0	0	0	1.25249	0	0	1.25249	1.25249	0	0	0	0	0	0	0	0	1.25249	8.76741
		56000-56999	0	0	0	0	0	0	0	0	1.25249	2.50497	0	0	0	0	0	0	0	0	0	2.50497	1.25249	0	1.25249	0	0	0	0	0	0	0	0	1.25249	0	0	1.25249	1.25249	0	0	0	0	0	0	0	1.25249	0	0	0
		55000-55999	0	1.25249	0	0	0	0	0	1.25249	0	1.25249	0	0	1.25249	0	0	0	1.25249	0	0	0	0	0	0	0	0	0	0	0	0	0	0	0	0	1.25249	1.25249	0	0	0	2.50497	2.50497	3.75746	0	0	1.25249	0	0	0
		54000-54999	0	0	2.50497	0	0	1.25249	1.25249	0	0	1.25249	0	0	0	0	6.26243	0	0	0	0	0	0	0	1.25249	0	0	0	0	0	0	0	0	3.75746	0	0	3.75746	0	0	0	0	0	0	0	0	0	0	0	2.50497
		53000-53999	0	0	0	1.25249	0	0	0	0	0	0	0	0	0	0	0	1.25249	1.25249	0	0	0	1.25249	0	0	3.75746	2.50497	0	0	0	0	0	0	3.75746	1.25249	0	2.50497	0	0	0	0	0	0	0	0	0	1.25249	0	0
		52000-52999	0	0	0	0	1.25249	0	0	0	0	0	2.50497	0	0	0	1.25249	0	1.25249	0	0	3.75746	3.75746	0	0	0	0	0	0	1.25249	0	0	0	2.50497	0	0	0	0	2.50497	0	2.50497	0	1.25249	0	1.25249	0	0	0	0
		51000-51999	0	0	0	2.50497	0	1.25249	0	2.50497	0	0	0	0	0	0	0	0	0	0	0	0	0	0	0	0	0	0	1.25249	0	0	2.50497	0	2.50497	0	0	0	0	0	0	0	0	0	0	0	0	0	0	0
		50000-50999	0	0	0	0	0	1.25249	0	0	0	0	0	0	0	1.25249	0	1.25249	0	0	0	0	1.25249	0	0	0	1.25249	0	0	0	1.25249	0	2.50497	2.50497	1.25249	0	1.25249	0	1.25249	0	0	0	0	0	0	1.25249	2.50497	0	0
		49000-49999	1.25249	1.25249	0	0	0	0	0	1.25249	2.50497	1.25249	0	0	1.25249	0	2.50497	0	0	1.25249	0	0	0	0	1.25249	0	0	0	0	1.25249	2.50497	1.25249	2.50497	2.50497	1.25249	0	0	1.25249	0	0	0	1.25249	2.50497	0	0	0	0	0	0
		48000-48999	0	2.50497	0	0	0	0	0	1.25249	0	5.00995	1.25249	0	0	1.25249	1.25249	0	0	0	0	0	1.25249	0	0	1.25249	0	1.25249	1.25249	1.25249	0	0	2.50497	0	0	0	0	0	0	0	1.25249	0	1.25249	0	0	2.50497	1.25249	0	0
		47000-47999	0	0	0	0	0	0	0	0	0	0	0	0	0	0	0	0	0	0	0	0	2.50497	0	0	0	0	0	0	1.25249	2.50497	0	0	0	0	0	0	0	0	0	0	0	0	0	0	0	0	0	6.26243
		46000-46999	1.25249	0	1.25249	0	0	0	0	0	0	0	0	1.25249	1.25249	2.50497	0	0	1.25249	0	0	0	0	0	0	0	0	0	0	5.00995	0	0	3.75746	2.50497	8.76741	0	1.25249	2.50497	0	3.75746	0	0	0	0	0	0	2.50497	1.25249	10.0199
		45000-45999	1.25249	0	2.50497	1.25249	0	0	1.25249	0	0	0	0	1.25249	0	0	0	0	0	0	3.75746	1.25249	0	0	0	0	0	1.25249	0	0	0	0	0	2.50497	1.25249	0	0	0	0	0	1.25249	0	0	2.50497	1.25249	0	1.25249	20.0398
		44000-44999	0	0	0	0	0	1.25249	0	0	0	0	0	5.00995	0	0	0	0	0	1.25249	0	0	0	0	0	0	0	0	1.25249	0	1.25249	1.25249	0	1.25249	1.25249	0	0	0	0	2.50497	0	0	0	0	2.50497	2.50497	6.26243
		43000-43999	0	0	0	0	1.25249	1.25249	0	0	0	0	0	0	0	0	0	0	0	0	1.25249	0	0	0	0	0	0	0	1.25249	0	0	0	1.25249	0	1.25249	1.25249	0	0	0	0	0	0	1.25249	0	3.75746	13.7774
		42000-42999	0	0	0	0	0	0	0	0	2.50497	0	0	0	0	0	1.25249	0	0	0	1.25249	0	2.50497	0	0	0	0	0	0	0	0	0	0	0	0	0	1.25249	0	1.25249	0	1.25249	1.25249	0	3.75746	26.3022
		41000-41999	0	0	0	1.25249	0	0	0	2.50497	0	6.26243	0	0	0	0	0	0	0	2.50497	0	0	0	0	0	0	0	0	0	0	0	1.25249	0	0	1.25249	0	0	0	0	1.25249	1.25249	1.25249	0	3.75746
		40000-40999	1.25249	1.25249	0	0	0	0	0	0	0	0	1.25249	0	0	0	0	0	1.25249	0	0	1.25249	0	0	0	0	0	0	1.25249	0	1.25249	0	0	1.25249	0	0	0	0	0	0	1.25249	3.75746	7.51492
		39000-39999	0	0	0	0	0	0	2.50497	0	1.25249	0	0	3.75746	1.25249	1.25249	0	0	0	0	1.25249	0	1.25249	0	1.25249	0	0	0	0	0	0	0	0	1.25249	0	0	1.25249	1.25249	0	0	17.5348	8.76741
		38000-38999	0	0	0	1.25249	0	0	0	0	0	0	0	0	0	2.50497	0	1.25249	1.25249	0	0	0	1.25249	2.50497	0	0	3.75746	0	0	0	0	0	0	1.25249	2.50497	1.25249	2.50497	0	5.00995	2.50497	11.2724
		37000-37999	0	0	2.50497	0	0	0	0	0	1.25249	0	0	0	0	0	3.75746	0	0	0	1.25249	0	0	0	0	0	0	0	0	0	0	0	0	0	0	0	2.50497	1.25249	3.75746	38.8271
		36000-36999	0	0	0	0	0	0	1.25249	1.25249	0	0	0	0	0	0	1.25249	0	0	0	0	0	0	0	0	0	0	0	0	0	1.25249	0	0	0	3.75746	0	0	7.51492	7.51492
		35000-35999	0	0	5.00995	0	0	0	0	0	0	0	0	0	0	0	0	0	0	0	1.25249	0	1.25249	0	0	0	0	0	0	1.25249	0	0	0	1.25249	1.25249	0	3.75746	13.7774
		34000-34999	0	1.25249	0	0	0	0	0	0	0	0	0	0	0	0	1.25249	0	3.75746	0	0	0	0	0	0	0	0	0	0	0	0	0	0	0	1.25249	1.25249	10.0199
		33000-33999	1.25249	1.25249	1.25249	0	0	0	0	0	0	0	0	0	1.25249	0	1.25249	1.25249	0	2.50497	0	0	0	0	0	0	0	0	0	1.25249	0	0	0	1.25249	8.76741	2.50497
		32000-32999	0	2.50497	0	1.25249	1.25249	1.25249	2.50497	0	1.25249	1.25249	0	3.75746	0	0	0	0	1.25249	0	0	0	0	0	0	1.25249	0	0	1.25249	0	0	1.25249	0	25.0497	17.5348
		31000-31999	0	2.50497	0	1.25249	1.25249	0	3.75746	0	0	1.25249	0	0	0	0	0	0	0	1.25249	0	2.50497	0	0	1.25249	0	0	1.25249	1.25249	0	1.25249	0	21.2923	11.2724
		30000-30999	1.25249	0	0	0	1.25249	0	0	0	0	0	0	1.25249	0	0	3.75746	0	1.25249	0	0	0	2.50497	1.25249	0	1.25249	0	0	1.25249	1.25249	0	1.25249	17.5348
		29000-29999	0	0	1.25249	1.25249	0	0	2.50497	0	0	0	0	1.25249	0	0	0	0	0	0	2.50497	1.25249	0	0	0	0	0	1.25249	2.50497	2.50497	6.26243	31.3122
		28000-28999	0	0	0	1.25249	0	1.25249	3.75746	2.50497	1.25249	0	0	0	0	0	3.75746	0	2.50497	2.50497	0	0	0	0	0	0	0	1.25249	0	11.2724	7.51492
		27000-27999	0	0	0	3.75746	1.25249	0	0	2.50497	0	0	0	0	0	0	0	0	0	0	0	0	0	1.25249	1.25249	1.25249	3.75746	0	10.0199	21.2923
		26000-26999	0	0	0	0	0	0	0	1.25249	0	2.50497	1.25249	1.25249	1.25249	2.50497	0	1.25249	0	0	0	1.25249	1.25249	0	0	1.25249	2.50497	12.5249	35.0696
		25000-25999	0	0	0	0	0	0	0	0	0	0	0	0	0	0	0	0	0	2.50497	0	0	1.25249	0	0	0	1.25249	16.2823
		24000-24999	0	0	0	0	0	2.50497	1.25249	0	1.25249	0	1.25249	0	0	0	0	0	0	0	0	0	1.25249	0	0	1.25249	8.76741
		23000-23999	0	1.25249	0	0	1.25249	1.25249	0	0	0	0	0	0	1.25249	0	1.25249	0	1.25249	1.25249	0	0	1.25249	1.25249	1.25249	15.0298
		22000-22999	0	0	0	1.25249	0	0	0	0	0	2.50497	0	0	0	1.25249	0	0	0	0	0	0	0	1.25249	6.26243
		21000-21999	0	0	0	0	0	0	0	0	0	0	0	5.00995	0	0	1.25249	2.50497	0	0	0	0	3.75746	11.2724
		20000-20999	0	1.25249	0	0	0	0	0	2.50497	0	0	1.25249	0	0	0	1.25249	3.75746	0	0	0	2.50497	20.0398
		19000-19999	0	0	0	0	0	0	2.50497	0	0	0	5.00995	0	1.25249	1.25249	0	6.26243	0	0	5.00995	6.26243
		18000-18999	0	0	0	0	0	1.25249	0	0	2.50497	1.25249	0	1.25249	0	0	0	0	2.50497	2.50497	43.837
		17000-17999	0	0	0	1.25249	0	0	0	0	0	1.25249	0	0	0	0	0	0	1.25249	7.51492
		16000-16999	0	3.75746	0	0	2.50497	1.25249	0	3.75746	0	0	2.50497	0	1.25249	0	0	3.75746	10.0199
		15000-15999	0	0	0	0	0	0	0	0	0	0	0	0	1.25249	0	2.50497	11.2724
		14000-14999	0	0	0	2.50497	3.75746	0	2.50497	0	0	1.25249	0	1.25249	0	0	10.0199
		13000-13999	0	0	0	0	0	0	0	1.25249	0	0	0	1.25249	1.25249	12.5249
		12000-12999	1.25249	0	0	0	0	0	0	0	0	2.50497	0	15.0298	16.2823
		11000-11999	0	0	0	0	0	0	0	0	0	3.75746	3.75746	16.2823
		10000-10999	0	0	0	0	0	0	0	1.25249	0	2.50497	16.2823
		9000-9999	0	0	0	0	0	0	0	1.25249	3.75746	13.7774
		8000-8999	3.75746	0	0	0	1.25249	0	1.25249	3.75746	20.0398
		7000-7999	0	1.25249	1.25249	1.25249	2.50497	1.25249	5.00995	22.5448
		6000-6999	0	0	1.25249	0	1.25249	7.51492	10.0199
		5000-5999	0	0	0	0	5.00995	17.5348
		4000-4999	0	0	0	3.75746	17.5348
		3000-3999	1.25249	3.75746	11.2724	57.6144
		2000-2999	2.50497	7.51492	15.0298
		1000-1999	3.75746	6.26243
		0-999	8.76741
[truncated: 82 more columns]

## Sheet: Supp. Table S20
Rearrangement junctions per position per 10000 plastid genomes in A. thaliana reca1polIb
Organism		Genome Positions	0-999	1000-1999	2000-2999	3000-3999	4000-4999	5000-5999	6000-6999	7000-7999	8000-8999	9000-9999	10000-10999	11000-11999	12000-12999	13000-13999	14000-14999	15000-15999	16000-16999	17000-17999	18000-18999	19000-19999	20000-20999	21000-21999	22000-22999	23000-23999	24000-24999	25000-25999	26000-26999	27000-27999	28000-28999	29000-29999	30000-30999	31000-31999	32000-32999	33000-33999	34000-34999	35000-35999	36000-36999	37000-37999	38000-38999	39000-39999	40000-40999	41000-41999	42000-42999	43000-43999	44000-44999	45000-45999	46000-46999
A.thaliana		128000-128214	0	0	0	0	0	0	0	0	0	0	0	0	0	0	0	0	0	0	0	0	0	0	0	0	0	0	0	0	0	0	0	0	0	0	0	0	0	0	0	0	0	0	0	0	0	0	0
Genome		127000-127999	0	0	0	0	0	3.89104	0	0	0	0	0	0	0	0	0	0	0	0	0	0	0	0	0	0	0	0	0	0	0	0	0	0	0	0	0	0	0	1.94552	0	0	0	0	0	0	3.89104	1.94552	0
Plastid		126000-126999	0	0	0	1.94552	0	1.94552	0	0	0	0	0	1.94552	0	0	0	0	0	1.94552	0	0	0	0	0	0	0	0	0	0	0	0	1.94552	1.94552	0	0	0	0	0	0	0	0	0	0	0	0	0	1.94552	0
Line		125000-125999	0	0	0	0	0	0	0	0	0	0	0	0	1.94552	0	0	0	0	0	0	0	0	0	0	0	0	0	0	0	0	0	0	0	0	0	0	0	0	0	0	0	1.94552	0	0	0	0	0	0
Col-0		124000-124999	0	1.94552	0	0	0	0	1.94552	1.94552	0	0	0	0	0	0	0	0	0	0	0	0	0	0	0	0	0	1.94552	0	0	1.94552	0	0	0	0	0	0	0	0	0	0	0	0	0	0	0	0	0	0
Mutations		123000-123999	0	0	0	0	0	0	0	1.94552	0	0	0	0	0	1.94552	0	0	0	0	0	0	0	0	0	0	0	0	0	0	0	0	0	0	0	0	0	0	0	0	0	0	0	0	0	0	0	0	0
reca1polIb		122000-122999	0	0	0	0	0	0	0	0	0	0	0	0	0	0	0	0	0	0	0	0	0	0	0	0	0	1.94552	0	0	1.94552	0	0	0	0	0	0	0	0	0	0	0	0	0	0	0	0	0	0
Total Reads		121000-121999	0	0	0	0	0	0	0	0	0	0	0	0	0	0	1.94552	0	0	0	0	0	0	0	0	0	0	1.94552	0	0	0	1.94552	0	0	0	0	0	0	0	0	0	1.94552	0	0	0	0	0	0	0
7940186		120000-120999	0	1.94552	0	0	0	1.94552	0	1.94552	0	0	0	0	0	1.94552	0	0	0	0	0	0	0	3.89104	0	0	0	0	0	1.94552	1.94552	0	0	0	1.94552	0	1.94552	0	0	0	0	1.94552	0	0	1.94552	0	0	0	0
Total Bases		119000-119999	0	0	0	0	0	0	0	0	0	0	0	0	0	0	1.94552	0	0	0	0	0	0	1.94552	0	0	0	0	0	0	0	0	0	0	0	0	1.94552	0	0	0	0	0	3.89104	0	0	1.94552	0	0	0
794018600		118000-118999	0	1.94552	0	0	0	0	0	0	0	0	0	0	0	0	0	0	0	0	1.94552	0	0	0	0	0	0	0	0	0	0	3.89104	0	0	0	0	0	0	0	0	0	0	0	0	1.94552	0	0	0	0
Genome Size		117000-117999	0	0	0	0	3.89104	0	0	0	1.94552	0	0	0	0	0	0	0	0	0	0	0	0	0	0	0	0	0	0	0	0	0	0	0	0	0	0	1.94552	0	0	0	0	1.94552	0	0	0	0	0	0
154478		116000-116999	0	0	0	0	0	0	0	0	0	0	1.94552	0	0	1.94552	0	0	0	1.94552	0	0	1.94552	0	0	1.94552	0	0	0	0	0	1.94552	0	0	0	1.94552	0	0	0	1.94552	0	0	0	0	0	0	0	0	0
Multiplier		115000-115999	0	0	0	0	0	0	0	0	0	0	0	0	0	0	0	1.94552	0	0	0	0	0	0	0	0	0	0	0	0	0	0	1.94552	0	0	1.94552	0	0	0	1.94552	0	0	0	0	0	0	0	0	0
1.94552		114000-114999	0	1.94552	0	0	0	0	0	0	0	0	0	0	0	0	0	0	0	0	0	0	0	0	0	0	0	0	0	0	0	0	0	0	0	0	1.94552	1.94552	0	0	0	0	0	0	0	0	0	0	0
		113000-113999	0	0	0	1.94552	0	0	0	0	0	0	0	0	3.89104	0	0	0	0	1.94552	0	0	0	0	0	0	0	0	0	0	0	0	1.94552	0	1.94552	0	0	0	0	0	0	1.94552	0	0	0	0	0	0	0
Color Scale		112000-112999	0	0	0	0	0	0	1.94552	0	1.94552	0	0	0	0	0	1.94552	0	0	0	1.94552	0	0	0	0	0	0	0	0	0	0	0	0	0	0	0	0	0	0	0	0	0	0	0	1.94552	0	1.94552	0	0
0		111000-111999	1.94552	0	0	0	0	1.94552	0	0	0	0	0	1.94552	0	0	0	0	0	0	0	0	0	0	1.94552	0	0	1.94552	0	0	0	0	0	0	0	0	0	0	0	0	0	0	0	0	0	0	0	0	0
1		110000-110999	0	0	0	0	0	0	0	3.89104	0	0	0	0	1.94552	0	1.94552	0	0	0	0	0	0	0	0	0	1.94552	0	1.94552	0	0	0	0	0	0	0	0	0	0	0	0	0	0	0	0	0	0	0	1.94552
2		109000-109999	0	0	0	0	0	0	0	1.94552	0	0	0	0	0	0	0	0	0	0	0	0	0	0	0	0	0	0	0	0	0	0	0	1.94552	1.94552	0	0	0	0	0	0	0	0	1.94552	0	0	0	0	0
3		108000-108999	0	0	0	0	0	0	0	1.94552	0	0	0	0	0	0	0	0	0	0	0	0	0	0	0	0	0	0	0	0	0	0	0	0	0	0	1.94552	0	0	0	0	0	0	0	0	1.94552	0	1.94552	0
4		107000-107999	0	0	0	0	0	0	1.94552	0	0	0	0	0	0	0	0	0	0	0	0	0	1.94552	0	0	0	0	0	0	0	1.94552	0	0	0	0	1.94552	0	0	0	0	0	3.89104	0	0	0	0	1.94552	0	0
5		106000-106999	0	0	0	0	0	0	0	0	0	0	0	0	0	0	0	0	0	0	0	0	0	1.94552	0	0	0	0	0	0	1.94552	0	0	0	0	0	3.89104	0	0	0	0	0	0	0	0	0	0	0	0
6		105000-105999	0	0	0	0	0	0	0	0	0	0	0	0	0	0	0	1.94552	0	0	1.94552	0	0	0	0	0	0	0	0	1.94552	0	1.94552	0	0	0	0	0	0	0	0	0	0	0	0	0	0	1.94552	0	0
7		104000-104999	0	0	0	0	0	0	1.94552	0	0	0	0	0	0	0	0	0	0	0	3.89104	0	0	0	1.94552	0	0	0	0	0	0	0	0	0	0	1.94552	0	0	0	0	0	0	0	0	0	0	1.94552	0	0
8		103000-103999	0	1.94552	0	0	0	1.94552	0	1.94552	0	0	0	0	0	0	0	0	0	0	0	0	0	0	0	0	0	0	0	0	1.94552	0	1.94552	0	0	0	0	0	0	1.94552	0	1.94552	0	0	0	0	0	0	0
9		102000-102999	0	7.78208	0	0	0	0	0	0	0	0	0	1.94552	0	0	0	0	0	0	0	3.89104	0	0	0	0	0	0	0	0	0	0	0	0	0	0	0	0	0	0	1.94552	0	0	0	0	0	0	0	0
10		101000-101999	0	0	0	0	0	0	0	0	0	0	1.94552	0	0	0	0	0	0	0	0	0	0	0	0	0	0	0	0	0	0	1.94552	0	0	0	1.94552	0	0	0	1.94552	0	0	0	0	0	0	0	0	0
11		100000-100999	0	3.89104	0	0	13.6186	0	0	0	0	0	0	0	0	1.94552	1.94552	0	0	0	0	0	0	0	0	0	5.83656	1.94552	0	0	0	0	0	0	0	1.94552	0	0	0	3.89104	0	1.94552	0	1.94552	0	0	0	0	0
12		99000-99999	0	0	0	0	0	0	0	0	1.94552	0	0	0	0	0	0	0	0	0	1.94552	1.94552	0	0	0	1.94552	0	0	0	0	1.94552	0	0	1.94552	0	0	0	0	0	1.94552	1.94552	0	0	0	0	0	0	0	1.94552
13		98000-98999	0	1.94552	0	1.94552	0	0	0	0	0	0	0	1.94552	0	1.94552	0	0	1.94552	0	0	0	0	0	1.94552	0	1.94552	0	0	0	0	0	0	0	1.94552	1.94552	0	0	0	1.94552	0	1.94552	0	0	0	0	0	1.94552	1.94552
14		97000-97999	0	0	0	0	0	1.94552	0	0	0	0	3.89104	0	0	0	0	0	0	0	0	0	0	1.94552	0	0	1.94552	0	0	0	1.94552	0	0	0	0	0	0	0	1.94552	0	0	0	0	0	0	1.94552	0	0	0
15		96000-96999	0	0	1.94552	0	0	0	0	1.94552	0	0	0	0	0	1.94552	0	0	0	0	0	0	0	0	1.94552	0	0	0	0	0	0	0	0	0	0	0	0	1.94552	0	0	0	0	0	0	0	0	0	0	0
		95000-95999	3.89104	1.94552	0	0	0	0	0	0	0	0	0	0	0	0	0	0	0	0	0	0	0	0	0	0	1.94552	3.89104	0	0	0	1.94552	0	1.94552	1.94552	0	0	0	0	0	0	0	0	1.94552	0	0	0	0	0
		94000-94999	0	0	0	0	0	0	0	5.83656	0	0	1.94552	0	0	0	0	0	0	0	3.89104	0	1.94552	0	0	0	1.94552	0	0	1.94552	0	0	0	0	0	0	0	0	0	0	0	0	0	0	0	0	0	0	0
		93000-93999	1.94552	0	0	1.94552	3.89104	0	7.78208	0	0	0	0	0	0	0	0	0	0	1.94552	3.89104	0	1.94552	0	0	3.89104	0	0	0	0	0	0	0	0	0	1.94552	0	0	0	0	0	0	0	0	0	0	0	0	0
		92000-92999	1.94552	0	0	1.94552	1.94552	0	0	1.94552	0	0	0	1.94552	0	1.94552	0	0	0	0	0	0	0	0	0	0	0	3.89104	1.94552	0	0	0	0	0	0	0	1.94552	1.94552	0	0	0	0	0	0	0	0	0	0	0
		91000-91999	0	1.94552	0	0	0	0	0	0	0	0	1.94552	0	0	0	0	1.94552	0	1.94552	1.94552	0	0	0	0	0	0	1.94552	0	0	3.89104	0	0	0	0	0	0	0	0	1.94552	0	0	0	0	3.89104	0	1.94552	0	0
		90000-90999	0	0	0	0	0	0	0	0	0	0	0	0	0	0	0	1.94552	3.89104	1.94552	0	0	0	0	1.94552	1.94552	0	1.94552	0	0	0	0	0	0	0	0	0	1.94552	0	0	0	0	0	0	0	0	0	0	0
		89000-89999	1.94552	0	0	0	0	0	0	0	0	1.94552	0	0	0	3.89104	0	0	1.94552	0	0	1.94552	0	0	1.94552	0	0	0	0	0	1.94552	0	0	3.89104	0	0	1.94552	0	0	0	0	0	0	0	0	1.94552	0	0	0
		88000-88999	0	5.83656	0	0	0	0	0	0	3.89104	0	0	0	0	0	0	0	1.94552	0	0	0	0	0	0	0	0	1.94552	0	1.94552	0	0	0	0	0	0	0	0	0	0	0	0	0	0	0	0	0	0	0
		87000-87999	0	0	0	0	0	1.94552	0	0	0	0	0	0	0	0	0	0	0	0	0	0	0	0	0	0	0	0	0	0	0	0	0	0	0	3.89104	0	0	0	0	0	0	0	0	1.94552	0	1.94552	0	0
		86000-86999	0	0	1.94552	0	0	1.94552	0	0	0	3.89104	1.94552	1.94552	0	0	0	0	1.94552	0	0	0	0	1.94552	0	0	0	0	0	1.94552	0	0	0	0	0	0	0	0	0	0	0	0	0	1.94552	0	0	0	0	0
		85000-85999	1.94552	0	0	0	0	0	0	0	0	0	0	0	0	0	1.94552	0	1.94552	0	0	0	0	0	0	0	0	0	1.94552	0	0	0	0	0	0	0	0	0	0	0	0	0	1.94552	0	0	0	0	0	0
		84000-84999	15.5642	0	1.94552	0	1.94552	0	0	0	0	0	0	0	0	0	1.94552	0	0	1.94552	0	1.94552	0	0	3.89104	0	0	0	0	0	0	1.94552	1.94552	0	1.94552	0	1.94552	0	0	1.94552	0	0	0	1.94552	0	0	1.94552	0	0
		83000-83999	1.94552	0	0	1.94552	0	0	0	0	0	0	0	0	0	0	0	0	0	0	0	0	0	0	0	0	0	0	0	0	0	0	0	0	0	0	0	0	1.94552	0	0	1.94552	0	0	0	0	0	0	0
		82000-82999	1.94552	0	0	0	1.94552	0	0	0	0	0	0	0	0	0	0	1.94552	0	0	0	0	0	0	0	0	0	0	0	1.94552	0	0	0	0	0	1.94552	0	1.94552	1.94552	0	0	0	0	0	1.94552	1.94552	0	0	0
		81000-81999	0	0	0	0	0	0	0	0	0	0	0	0	0	0	0	0	0	0	0	0	0	0	0	0	0	0	0	0	0	0	0	0	0	0	0	0	0	0	0	0	0	0	0	0	0	0	0
		80000-80999	0	1.94552	0	0	0	0	0	0	0	3.89104	0	0	3.89104	0	0	0	0	0	0	1.94552	3.89104	0	0	0	0	0	0	0	1.94552	0	0	0	0	0	0	0	0	0	0	0	0	0	0	0	0	0	0
		79000-79999	0	0	0	0	0	0	0	0	0	0	0	0	0	0	0	0	0	0	0	0	0	0	0	0	1.94552	0	0	0	0	0	0	0	0	0	0	0	0	1.94552	1.94552	0	0	0	0	0	0	0	0
		78000-78999	0	0	0	0	1.94552	0	0	0	0	0	0	0	0	0	0	0	0	0	0	0	0	0	0	1.94552	0	0	0	0	0	0	0	0	0	0	1.94552	0	0	0	1.94552	0	0	0	1.94552	0	0	0	0
		77000-77999	0	0	1.94552	0	0	0	0	0	0	0	0	0	0	0	1.94552	0	0	3.89104	0	1.94552	0	0	0	0	0	0	0	0	0	0	0	0	0	0	0	0	0	0	0	0	0	0	1.94552	0	0	0	0
		76000-76999	0	0	1.94552	0	0	0	0	0	0	0	0	0	1.94552	0	0	0	1.94552	0	0	0	0	0	0	0	0	0	0	0	0	0	0	0	0	0	0	0	0	0	0	0	0	0	0	0	0	0	0
		75000-75999	1.94552	0	0	0	0	0	0	0	0	0	0	0	1.94552	0	0	0	0	0	0	0	0	1.94552	1.94552	0	0	0	0	1.94552	0	0	0	0	0	0	0	0	0	0	0	0	0	0	0	0	0	0	0
		74000-74999	0	1.94552	0	0	0	0	0	0	0	0	0	1.94552	1.94552	0	0	0	0	0	1.94552	0	0	0	0	1.94552	0	1.94552	0	0	0	0	0	1.94552	0	0	0	0	0	3.89104	0	0	0	0	1.94552	0	1.94552	0	0
		73000-73999	0	0	0	0	0	0	0	0	0	0	0	0	0	0	0	0	0	0	0	0	0	0	0	0	0	0	0	0	0	0	1.94552	0	0	0	0	0	0	0	0	0	3.89104	0	0	0	0	1.94552	0
		72000-72999	0	0	0	0	0	0	0	0	0	0	0	0	0	0	1.94552	3.89104	0	0	0	0	0	0	0	0	0	0	0	0	0	0	0	0	0	1.94552	0	0	0	3.89104	0	1.94552	0	0	0	1.94552	0	0	0
		71000-71999	0	0	1.94552	1.94552	0	0	1.94552	0	0	0	0	0	0	0	0	0	0	3.89104	0	0	0	1.94552	0	0	0	0	0	0	0	0	0	0	0	0	0	0	0	0	0	0	0	0	0	0	0	0	1.94552
		70000-70999	0	0	0	0	0	0	0	1.94552	0	0	0	0	0	0	0	0	0	0	0	0	0	0	1.94552	0	0	0	0	0	0	0	0	0	0	0	0	0	0	0	0	0	0	0	0	0	0	0	1.94552
		69000-69999	0	0	0	0	0	0	0	0	0	0	0	0	0	0	0	0	0	0	0	0	0	0	0	0	0	0	0	0	1.94552	0	0	0	0	0	0	0	0	0	0	0	0	0	0	0	0	0	0
		68000-68999	0	0	0	1.94552	1.94552	0	0	0	0	0	0	0	0	0	1.94552	0	0	0	0	0	0	0	0	0	0	0	0	0	0	0	0	0	0	0	0	0	0	0	0	0	0	0	0	0	0	0	0
		67000-67999	0	1.94552	0	0	1.94552	1.94552	0	0	0	0	0	0	0	0	0	0	0	0	0	0	1.94552	0	0	0	0	0	0	0	1.94552	0	1.94552	0	0	0	0	0	0	0	0	0	0	0	0	0	0	0	0
		66000-66999	3.89104	0	0	0	1.94552	0	0	0	0	3.89104	0	0	0	0	0	0	0	1.94552	0	0	0	0	0	0	0	0	1.94552	0	0	0	0	1.94552	0	0	0	0	1.94552	1.94552	0	0	0	0	0	0	0	0	0
		65000-65999	0	0	0	0	0	0	0	0	0	0	0	0	1.94552	0	0	0	0	0	0	0	0	0	0	0	0	0	0	0	0	1.94552	0	0	0	0	0	0	0	0	0	0	0	0	0	0	0	0	0
		64000-64999	0	0	0	0	3.89104	0	0	0	0	1.94552	1.94552	0	0	0	0	0	0	0	0	0	0	0	0	0	0	0	0	0	0	0	0	0	0	0	1.94552	0	0	0	0	0	0	0	0	0	0	1.94552	0
		63000-63999	0	0	0	0	0	0	0	0	0	1.94552	0	0	0	0	0	0	0	0	0	0	0	0	0	0	0	0	0	0	0	0	0	0	0	1.94552	0	0	0	0	0	0	0	0	0	0	0	1.94552	0
		62000-62999	0	0	0	0	0	0	0	0	0	0	0	0	0	0	0	0	0	0	0	0	0	0	0	0	0	0	0	0	0	0	1.94552	0	0	0	0	0	0	0	0	0	0	0	0	0	0	0	0
		61000-61999	0	0	0	0	0	0	0	1.94552	0	0	0	0	0	0	1.94552	1.94552	0	0	0	0	0	0	0	0	0	1.94552	0	0	0	0	0	0	0	0	0	1.94552	0	0	0	0	0	0	0	0	1.94552	0	0
		60000-60999	1.94552	3.89104	0	0	0	0	0	0	0	0	0	0	0	0	3.89104	0	0	0	0	0	0	0	0	0	0	0	0	0	0	0	0	0	0	0	0	0	0	0	1.94552	0	3.89104	0	1.94552	0	0	1.94552	0
		59000-59999	0	1.94552	0	0	0	0	0	0	0	0	0	0	0	0	0	0	0	0	0	0	0	0	0	0	0	0	0	0	0	0	1.94552	0	0	0	0	0	0	0	0	0	0	0	1.94552	0	0	0	0
		58000-58999	0	0	0	0	0	0	0	0	0	0	0	0	0	0	0	0	0	0	0	0	0	0	0	0	0	0	0	0	0	0	0	0	0	0	0	0	0	0	0	0	0	0	0	0	0	0	0
		57000-57999	0	0	1.94552	0	0	0	0	0	0	0	0	0	0	0	0	0	0	0	0	0	0	0	0	0	0	0	0	0	1.94552	0	0	1.94552	0	0	0	0	0	0	0	0	0	0	0	0	0	0	0
		56000-56999	0	0	0	0	0	0	0	0	0	0	0	1.94552	0	0	0	1.94552	0	0	0	0	0	0	0	0	0	0	0	0	0	0	1.94552	0	0	0	0	0	0	0	0	1.94552	0	0	0	0	0	0	0
		55000-55999	0	0	1.94552	0	0	0	0	0	0	0	0	0	0	0	0	0	0	0	1.94552	0	0	1.94552	0	3.89104	1.94552	0	0	0	0	0	0	0	0	0	0	0	0	0	0	1.94552	0	1.94552	0	0	1.94552	0	0
		54000-54999	0	0	0	0	0	0	0	0	0	0	0	0	0	0	3.89104	0	0	0	0	0	0	0	0	1.94552	0	0	0	0	0	0	0	0	0	0	0	0	0	0	0	0	0	0	0	0	0	0	0
		53000-53999	0	0	0	0	0	0	0	0	0	0	0	0	0	0	0	0	1.94552	0	0	0	0	0	0	1.94552	0	0	0	0	0	0	0	0	0	1.94552	0	0	0	0	0	3.89104	0	0	0	0	0	0	0
		52000-52999	0	0	0	1.94552	0	0	0	0	0	0	0	1.94552	0	0	1.94552	0	0	0	0	0	0	0	0	0	0	0	0	0	0	0	0	0	0	0	0	0	0	0	0	0	3.89104	0	0	0	0	1.94552	0
		51000-51999	0	0	0	0	0	0	0	0	0	0	0	0	0	0	0	0	0	0	0	0	0	0	0	1.94552	0	0	0	0	0	0	0	0	0	0	0	0	0	0	0	0	0	0	0	0	0	0	0
		50000-50999	0	0	0	0	0	0	0	0	0	0	0	0	0	0	0	1.94552	0	0	0	1.94552	0	0	0	1.94552	0	0	0	0	1.94552	0	1.94552	0	1.94552	0	0	0	1.94552	0	0	0	0	0	0	1.94552	0	0	1.94552
		49000-49999	0	0	0	0	0	0	0	0	0	0	0	0	0	0	0	0	0	0	0	1.94552	0	0	0	1.94552	0	0	0	0	0	0	0	0	0	0	0	0	0	0	0	0	0	0	0	3.89104	0	0	1.94552
		48000-48999	0	0	0	0	0	0	0	0	0	0	0	0	0	0	0	0	0	0	0	0	0	0	0	0	0	0	1.94552	0	0	0	0	0	0	0	0	0	0	0	0	0	0	0	0	1.94552	0	3.89104	0
		47000-47999	0	3.89104	0	0	0	0	0	0	0	1.94552	0	0	0	0	0	0	0	1.94552	0	0	0	0	0	0	0	0	0	0	0	0	1.94552	0	0	1.94552	0	0	0	0	0	0	0	0	0	0	0	0	3.89104
		46000-46999	1.94552	0	0	1.94552	1.94552	0	1.94552	0	0	1.94552	0	0	0	0	0	0	0	3.89104	1.94552	0	1.94552	0	0	0	0	0	0	0	0	0	0	0	0	0	0	0	0	0	0	0	0	0	0	0	0	0	7.78208
		45000-45999	0	0	0	0	1.94552	0	0	0	0	0	0	0	1.94552	0	0	0	0	0	0	0	0	0	0	0	0	0	0	0	0	0	0	0	0	0	0	0	0	0	0	0	0	0	0	0	1.94552	3.89104
		44000-44999	0	0	0	0	0	1.94552	0	1.94552	0	0	0	1.94552	0	0	0	0	0	1.94552	0	0	0	0	0	0	0	0	0	0	0	3.89104	0	0	0	0	0	0	0	0	0	0	1.94552	0	1.94552	0	7.78208
		43000-43999	0	0	0	0	0	0	0	0	0	0	0	0	0	0	0	0	0	0	0	0	0	0	0	0	0	0	0	0	0	0	0	0	0	0	0	0	0	0	0	0	0	0	1.94552	1.94552
		42000-42999	0	0	0	0	0	0	0	0	0	1.94552	0	0	0	0	0	0	0	0	0	0	0	0	0	0	0	0	0	0	0	0	0	0	0	0	0	0	0	0	0	0	0	0	5.83656
		41000-41999	0	1.94552	0	1.94552	0	0	0	0	0	0	0	0	0	0	0	0	0	0	0	1.94552	1.94552	0	0	0	0	0	0	0	0	0	0	0	0	0	0	0	0	0	0	0	0	5.83656
		40000-40999	0	0	0	0	0	0	0	0	0	0	0	0	0	0	1.94552	0	0	0	0	0	0	0	0	0	0	0	0	0	0	0	0	0	1.94552	0	0	0	0	3.89104	3.89104	3.89104	5.83656
		39000-39999	0	0	1.94552	0	0	0	0	0	0	0	0	0	0	1.94552	0	0	0	0	0	0	0	0	0	0	0	0	0	0	0	0	0	0	0	0	3.89104	0	0	1.94552	1.94552	3.89104
		38000-38999	0	0	0	1.94552	0	0	0	0	0	0	0	0	0	1.94552	1.94552	0	1.94552	0	0	3.89104	0	0	0	0	0	0	0	0	0	0	0	0	0	0	0	0	0	0	7.78208
		37000-37999	0	0	0	0	0	1.94552	0	0	1.94552	0	0	0	0	3.89104	0	0	0	5.83656	0	1.94552	0	3.89104	0	0	0	0	0	0	0	0	0	0	0	0	0	0	1.94552	9.72761
		36000-36999	0	0	0	0	0	0	0	0	0	0	0	5.83656	0	0	0	0	0	1.94552	0	0	0	0	0	0	0	0	0	0	0	0	0	0	0	0	0	1.94552	1.94552
		35000-35999	0	0	1.94552	0	0	0	0	0	3.89104	0	0	0	0	1.94552	0	0	0	0	0	1.94552	0	0	0	0	0	1.94552	0	0	0	0	0	0	0	0	0	17.5097
		34000-34999	0	0	0	0	0	1.94552	0	0	0	0	0	0	0	0	0	0	0	0	0	0	7.78208	0	0	0	0	0	0	0	0	0	1.94552	0	0	1.94552	3.89104
		33000-33999	0	0	0	1.94552	0	0	0	0	0	0	0	1.94552	0	0	3.89104	1.94552	0	0	0	0	1.94552	0	0	0	0	0	0	0	0	0	0	0	0	1.94552
		32000-32999	0	0	0	0	1.94552	0	0	0	0	1.94552	0	0	0	0	0	0	0	0	0	0	0	0	0	0	0	0	0	0	0	0	0	1.94552	9.72761
		31000-31999	0	0	0	0	0	0	0	1.94552	0	0	0	0	0	0	0	0	0	0	0	0	0	0	0	0	0	0	0	0	0	0	0	3.89104
		30000-30999	0	0	0	0	0	0	0	1.94552	0	0	0	0	0	1.94552	0	0	1.94552	0	0	3.89104	0	0	0	0	0	0	0	0	0	0	11.6731
		29000-29999	1.94552	0	0	0	0	0	0	0	0	0	0	1.94552	1.94552	0	0	0	0	1.94552	0	0	0	0	0	0	0	0	0	3.89104	3.89104	13.6186
		28000-28999	1.94552	0	0	0	3.89104	0	0	1.94552	1.94552	0	1.94552	0	0	0	1.94552	0	0	0	0	1.94552	0	0	0	0	0	0	0	0	7.78208
		27000-27999	0	0	0	0	0	0	0	0	0	0	0	0	0	0	0	0	0	0	0	0	0	0	0	0	0	1.94552	0	5.83656
		26000-26999	0	0	1.94552	0	1.94552	0	0	0	0	0	0	0	0	0	0	0	1.94552	0	0	0	0	0	0	1.94552	0	0	7.78208
		25000-25999	0	0	0	0	0	0	0	0	0	0	0	0	0	0	0	0	1.94552	3.89104	0	1.94552	0	0	0	1.94552	1.94552	11.6731
		24000-24999	0	0	0	1.94552	0	0	0	0	0	0	0	0	0	0	0	0	0	0	0	0	0	1.94552	0	1.94552	9.72761
		23000-23999	0	0	0	0	0	1.94552	0	0	0	0	0	0	0	0	0	0	0	0	0	0	0	0	0	3.89104
		22000-22999	0	0	0	0	0	0	0	0	0	0	0	0	0	1.94552	0	0	0	0	0	0	1.94552	5.83656	3.89104
		21000-21999	0	0	0	0	0	0	0	0	0	0	0	0	0	0	1.94552	0	0	0	0	0	0	11.6731
		20000-20999	0	0	0	0	0	0	0	0	0	0	0	0	0	0	1.94552	0	0	0	0	0	9.72761
		19000-19999	0	0	0	0	0	0	0	0	0	0	0	0	0	0	1.94552	0	0	0	1.94552	5.83656
		18000-18999	0	0	0	0	0	0	0	0	0	0	0	0	0	0	1.94552	0	0	1.94552	3.89104
		17000-17999	0	0	1.94552	0	0	0	0	5.83656	0	0	0	0	0	0	0	0	5.83656	3.89104
		16000-16999	0	0	0	0	0	0	0	0	0	0	1.94552	0	0	1.94552	0	0	9.72761
		15000-15999	0	0	0	0	0	0	0	0	0	1.94552	0	0	0	0	0	9.72761
		14000-14999	0	0	0	0	0	0	0	0	0	0	1.94552	0	0	3.89104	13.6186
		13000-13999	0	0	1.94552	1.94552	0	0	0	0	0	0	1.94552	0	0	7.78208
		12000-12999	0	0	0	0	0	0	0	0	0	0	0	0	7.78208
		11000-11999	1.94552	0	0	0	0	0	0	0	0	1.94552	3.89104	9.72761
		10000-10999	0	0	0	0	0	0	0	0	0	1.94552	7.78208
		9000-9999	0	1.94552	0	0	1.94552	0	0	0	0	1.94552
		8000-8999	0	0	1.94552	0	0	0	0	0	9.72761
		7000-7999	0	0	1.94552	1.94552	0	1.94552	0	13.6186
		6000-6999	0	0	0	0	0	0	9.72761
		5000-5999	0	0	0	0	1.94552	17.5097
		4000-4999	0	0	0	0	7.78208
		3000-3999	0	1.94552	1.94552	13.6186
		2000-2999	0	1.94552	9.72761
		1000-1999	1.94552	9.72761
		0-999	13.6186
[truncated: 82 more columns]

## Sheet: Supp. Table S21
Rearrangement junctions per position per 10000 plastid genomes in A. thaliana why1why3polIb
Organism		Genome Positions	0-999	1000-1999	2000-2999	3000-3999	4000-4999	5000-5999	6000-6999	7000-7999	8000-8999	9000-9999	10000-10999	11000-11999	12000-12999	13000-13999	14000-14999	15000-15999	16000-16999	17000-17999	18000-18999	19000-19999	20000-20999	21000-21999	22000-22999	23000-23999	24000-24999	25000-25999	26000-26999	27000-27999	28000-28999	29000-29999	30000-30999	31000-31999	32000-32999	33000-33999	34000-34999	35000-35999	36000-36999	37000-37999	38000-38999	39000-39999	40000-40999	41000-41999	42000-42999	43000-43999	44000-44999	45000-45999	46000-46999
A.thaliana		128000-128214	1.27252	0	0	0	0	0	0	0	0	0	0	0	0	0	0	0	0	0	0	0	0	0	0	0	0	1.27252	0	0	0	0	0	0	0	0	0	0	0	0	1.27252	0	0	0	0	0	0	0	0
Genome		127000-127999	0	0	0	0	6.36261	0	0	1.27252	0	1.27252	0	1.27252	0	0	0	0	0	0	0	0	0	0	1.27252	0	0	1.27252	1.27252	2.54505	0	1.27252	2.54505	1.27252	1.27252	1.27252	1.27252	0	1.27252	0	0	0	1.27252	0	0	0	1.27252	1.27252	0
Plastid		126000-126999	0	0	0	0	1.27252	1.27252	0	0	2.54505	0	0	0	2.54505	0	2.54505	0	0	0	3.81757	0	0	0	0	0	2.54505	0	2.54505	0	1.27252	1.27252	11.4527	1.27252	1.27252	0	0	2.54505	0	0	0	1.27252	0	0	0	0	0	0	0
Line		125000-125999	0	2.54505	1.27252	0	0	0	0	1.27252	0	0	0	0	0	0	0	0	0	0	1.27252	0	0	0	1.27252	0	1.27252	0	0	0	1.27252	0	1.27252	2.54505	0	0	0	1.27252	0	0	0	1.27252	0	0	0	0	0	0	0
Col-0		124000-124999	0	1.27252	0	1.27252	1.27252	3.81757	2.54505	0	0	0	0	0	1.27252	2.54505	1.27252	0	0	0	0	0	0	0	0	0	0	0	0	0	0	1.27252	7.63514	1.27252	0	0	0	0	0	0	0	0	0	0	1.27252	0	2.54505	1.27252	6.36261
Mutations		123000-123999	0	0	0	1.27252	0	0	0	0	0	0	1.27252	1.27252	0	0	0	0	1.27252	1.27252	0	0	3.81757	0	0	1.27252	0	1.27252	0	0	0	0	1.27252	0	1.27252	1.27252	1.27252	1.27252	0	0	0	0	0	0	1.27252	2.54505	2.54505	1.27252	1.27252
why1why3polIb		122000-122999	1.27252	0	0	1.27252	0	0	0	0	0	0	0	0	0	0	2.54505	0	1.27252	0	0	0	0	0	0	0	0	2.54505	0	0	1.27252	0	0	0	0	0	1.27252	2.54505	0	0	0	0	2.54505	0	1.27252	0	1.27252	0	0
Total Reads		121000-121999	0	2.54505	0	2.54505	0	1.27252	1.27252	0	0	0	1.27252	0	0	1.27252	3.81757	0	2.54505	0	0	0	0	0	1.27252	0	0	0	0	0	2.54505	0	0	0	0	0	1.27252	2.54505	1.27252	0	0	0	0	1.27252	1.27252	0	0	2.54505	0
12139510		120000-120999	0	0	0	1.27252	1.27252	2.54505	0	2.54505	0	0	1.27252	0	0	0	0	0	0	1.27252	0	0	0	1.27252	0	0	2.54505	0	0	0	1.27252	2.54505	0	1.27252	0	0	0	0	1.27252	0	0	0	2.54505	2.54505	1.27252	3.81757	2.54505	0	2.54505
Total Bases		119000-119999	0	3.81757	1.27252	0	3.81757	7.63514	1.27252	1.27252	0	3.81757	2.54505	0	3.81757	1.27252	0	0	0	2.54505	0	1.27252	0	0	0	0	3.81757	1.27252	0	0	6.36261	1.27252	2.54505	1.27252	2.54505	0	0	0	0	5.09009	0	0	0	0	0	0	0	0	1.27252
1213951000		118000-118999	0	0	0	0	1.27252	6.36261	0	1.27252	1.27252	0	0	0	1.27252	5.09009	2.54505	0	0	0	1.27252	0	0	0	0	0	0	2.54505	0	1.27252	0	1.27252	0	0	2.54505	0	1.27252	0	6.36261	0	0	0	1.27252	2.54505	1.27252	0	2.54505	2.54505	0
Genome Size		117000-117999	1.27252	2.54505	0	0	1.27252	1.27252	0	0	0	0	0	0	0	0	1.27252	0	0	0	0	0	0	0	0	2.54505	1.27252	2.54505	0	0	2.54505	1.27252	1.27252	1.27252	2.54505	0	2.54505	0	0	0	0	0	0	0	1.27252	0	1.27252	0	0
154478		116000-116999	3.81757	1.27252	0	0	2.54505	0	0	0	1.27252	0	2.54505	1.27252	1.27252	0	3.81757	0	1.27252	0	1.27252	0	0	1.27252	0	0	1.27252	0	0	0	0	0	0	1.27252	0	0	0	0	0	1.27252	0	0	0	0	1.27252	1.27252	0	0	1.27252
Multiplier		115000-115999	0	0	0	0	0	0	1.27252	0	0	0	0	2.54505	0	2.54505	1.27252	1.27252	0	0	1.27252	1.27252	0	0	1.27252	0	2.54505	0	0	0	2.54505	1.27252	1.27252	1.27252	1.27252	2.54505	0	0	2.54505	0	1.27252	1.27252	0	0	2.54505	0	0	0	1.27252
1.27252		114000-114999	1.27252	0	0	0	1.27252	0	0	0	0	1.27252	2.54505	0	2.54505	2.54505	3.81757	1.27252	0	0	0	0	0	0	0	0	1.27252	0	0	0	2.54505	0	1.27252	0	1.27252	1.27252	0	1.27252	1.27252	0	0	0	0	0	1.27252	1.27252	0	0	0
		113000-113999	3.81757	0	1.27252	0	0	0	0	1.27252	0	0	0	0	0	0	0	0	0	0	0	0	0	0	1.27252	1.27252	0	1.27252	1.27252	0	0	3.81757	1.27252	2.54505	3.81757	0	0	0	0	0	0	1.27252	0	0	1.27252	1.27252	1.27252	0	0
Color Scale		112000-112999	1.27252	0	0	0	3.81757	0	3.81757	1.27252	0	2.54505	0	1.27252	0	3.81757	0	0	1.27252	0	0	0	0	0	0	0	5.09009	0	0	0	0	2.54505	0	0	0	1.27252	0	0	1.27252	0	0	1.27252	1.27252	0	0	0	0	0	1.27252
0		111000-111999	0	0	1.27252	0	0	1.27252	1.27252	1.27252	1.27252	0	0	0	0	2.54505	1.27252	0	1.27252	2.54505	6.36261	0	0	0	1.27252	3.81757	0	0	0	1.27252	0	1.27252	0	2.54505	0	0	1.27252	1.27252	1.27252	0	0	0	0	0	2.54505	0	0	0	2.54505
1		110000-110999	0	1.27252	0	0	6.36261	0	1.27252	1.27252	0	0	0	0	0	2.54505	0	0	1.27252	1.27252	2.54505	1.27252	1.27252	0	2.54505	1.27252	0	3.81757	1.27252	0	3.81757	1.27252	1.27252	2.54505	3.81757	0	0	0	1.27252	0	0	0	0	0	1.27252	1.27252	0	1.27252	3.81757
2		109000-109999	1.27252	2.54505	1.27252	0	0	10.1802	1.27252	1.27252	1.27252	1.27252	0	0	0	1.27252	3.81757	1.27252	1.27252	0	0	1.27252	0	1.27252	3.81757	1.27252	1.27252	0	0	2.54505	2.54505	0	0	1.27252	0	1.27252	2.54505	1.27252	3.81757	0	2.54505	1.27252	1.27252	1.27252	6.36261	0	0	1.27252	1.27252
3		108000-108999	0	6.36261	0	1.27252	1.27252	0	3.81757	2.54505	0	0	1.27252	0	0	7.63514	2.54505	0	0	2.54505	0	0	0	2.54505	1.27252	2.54505	0	2.54505	0	0	1.27252	0	0	1.27252	0	0	0	3.81757	0	0	2.54505	1.27252	0	0	2.54505	0	0	2.54505	0
4		107000-107999	0	1.27252	0	1.27252	0	1.27252	0	0	0	0	0	0	0	0	1.27252	0	3.81757	0	0	0	2.54505	2.54505	0	0	0	2.54505	1.27252	1.27252	0	0	0	1.27252	0	0	1.27252	0	2.54505	0	0	1.27252	5.09009	0	0	0	0	0	1.27252
5		106000-106999	0	0	0	0	0	0	0	1.27252	0	0	0	0	2.54505	0	0	0	0	0	0	1.27252	0	2.54505	0	0	0	0	0	0	0	0	0	0	1.27252	0	0	0	0	1.27252	1.27252	0	0	1.27252	0	0	1.27252	5.09009	0
6		105000-105999	0	0	0	0	0	0	0	0	0	0	0	0	1.27252	0	0	0	0	2.54505	1.27252	0	0	0	1.27252	0	0	0	0	0	0	0	1.27252	0	1.27252	0	0	0	0	0	0	0	1.27252	0	1.27252	0	0	0	0
7		104000-104999	1.27252	0	0	0	0	1.27252	0	0	0	0	2.54505	0	0	0	0	2.54505	0	1.27252	0	0	2.54505	0	0	1.27252	0	0	0	1.27252	0	0	0	0	0	0	0	0	0	1.27252	1.27252	0	0	1.27252	1.27252	0	1.27252	1.27252	0
8		103000-103999	1.27252	0	2.54505	0	1.27252	0	0	1.27252	0	0	1.27252	0	0	0	1.27252	0	1.27252	0	0	0	2.54505	0	1.27252	0	0	1.27252	1.27252	1.27252	0	0	3.81757	0	1.27252	0	0	2.54505	0	2.54505	5.09009	1.27252	0	0	1.27252	0	0	1.27252	0
9		102000-102999	0	0	0	0	1.27252	1.27252	0	0	0	0	0	0	0	0	0	0	0	0	1.27252	0	0	1.27252	0	0	0	0	0	0	0	0	0	0	0	0	0	0	0	0	0	0	0	0	0	0	0	0	0
10		101000-101999	0	0	0	0	0	0	0	0	0	0	0	0	0	0	1.27252	0	0	0	0	0	1.27252	1.27252	0	0	1.27252	0	0	0	0	0	0	1.27252	0	0	0	1.27252	0	0	1.27252	1.27252	1.27252	0	0	0	1.27252	0	0
11		100000-100999	0	0	3.81757	0	2.54505	0	0	0	0	1.27252	2.54505	0	1.27252	0	0	0	0	1.27252	0	1.27252	0	1.27252	1.27252	5.09009	1.27252	0	0	0	1.27252	0	1.27252	2.54505	1.27252	0	1.27252	2.54505	5.09009	0	0	1.27252	0	0	0	0	1.27252	0	1.27252
12		99000-99999	0	0	0	1.27252	2.54505	1.27252	1.27252	3.81757	0	1.27252	0	0	0	0	0	0	0	0	2.54505	1.27252	0	0	0	0	0	0	0	0	2.54505	0	2.54505	0	5.09009	0	2.54505	0	0	0	0	0	1.27252	0	0	0	2.54505	0	1.27252
13		98000-98999	0	2.54505	0	5.09009	35.6306	3.81757	2.54505	2.54505	0	2.54505	0	2.54505	1.27252	2.54505	1.27252	0	1.27252	0	0	0	0	0	2.54505	0	0	0	1.27252	0	0	2.54505	0	0	0	0	0	1.27252	1.27252	0	0	2.54505	1.27252	1.27252	0	0	1.27252	0	0
14		97000-97999	7.63514	3.81757	3.81757	1.27252	0	0	0	0	0	0	0	0	0	1.27252	1.27252	2.54505	0	1.27252	0	1.27252	0	0	0	1.27252	0	0	0	5.09009	1.27252	3.81757	1.27252	2.54505	1.27252	0	2.54505	1.27252	2.54505	0	0	0	1.27252	0	0	1.27252	1.27252	1.27252	1.27252
15		96000-96999	5.09009	5.09009	3.81757	10.1802	2.54505	1.27252	2.54505	1.27252	1.27252	0	1.27252	0	0	0	0	1.27252	1.27252	0	1.27252	0	0	1.27252	0	0	0	0	0	1.27252	0	0	0	0	3.81757	0	0	0	1.27252	1.27252	0	2.54505	0	0	0	2.54505	1.27252	1.27252	0
		95000-95999	29.268	7.63514	6.36261	0	1.27252	3.81757	5.09009	2.54505	0	2.54505	7.63514	2.54505	2.54505	6.36261	2.54505	2.54505	1.27252	0	0	1.27252	0	0	2.54505	6.36261	3.81757	1.27252	0	1.27252	0	1.27252	0	1.27252	6.36261	0	1.27252	0	0	0	2.54505	0	5.09009	1.27252	0	0	0	1.27252	1.27252
		94000-94999	0	6.36261	0	1.27252	0	0	1.27252	1.27252	0	1.27252	1.27252	2.54505	0	8.90766	2.54505	0	0	1.27252	2.54505	2.54505	0	1.27252	2.54505	1.27252	3.81757	1.27252	2.54505	3.81757	2.54505	0	1.27252	0	2.54505	1.27252	1.27252	0	0	0	1.27252	0	0	0	0	0	1.27252	7.63514	0
		93000-93999	3.81757	5.09009	8.90766	7.63514	5.09009	1.27252	5.09009	0	2.54505	0	2.54505	0	1.27252	1.27252	3.81757	1.27252	0	6.36261	0	0	0	2.54505	1.27252	15.2703	2.54505	3.81757	3.81757	7.63514	5.09009	1.27252	0	1.27252	1.27252	6.36261	1.27252	0	0	3.81757	1.27252	0	1.27252	1.27252	6.36261	3.81757	0	1.27252	1.27252
		92000-92999	2.54505	2.54505	0	0	2.54505	0	0	3.81757	0	1.27252	0	1.27252	0	1.27252	17.8153	0	2.54505	1.27252	3.81757	2.54505	2.54505	3.81757	0	2.54505	0	2.54505	1.27252	3.81757	5.09009	1.27252	3.81757	0	1.27252	3.81757	1.27252	1.27252	0	0	1.27252	1.27252	2.54505	1.27252	6.36261	1.27252	1.27252	5.09009	0
		91000-91999	0	15.2703	0	5.09009	7.63514	5.09009	1.27252	3.81757	0	1.27252	2.54505	2.54505	1.27252	6.36261	6.36261	1.27252	0	1.27252	1.27252	1.27252	2.54505	6.36261	0	2.54505	1.27252	5.09009	2.54505	2.54505	2.54505	3.81757	0	1.27252	2.54505	2.54505	0	1.27252	1.27252	2.54505	1.27252	3.81757	1.27252	0	0	1.27252	0	3.81757	0
		90000-90999	2.54505	10.1802	1.27252	3.81757	0	2.54505	2.54505	7.63514	2.54505	1.27252	0	2.54505	2.54505	0	0	1.27252	1.27252	0	0	1.27252	6.36261	0	2.54505	0	0	6.36261	0	2.54505	0	2.54505	5.09009	1.27252	0	1.27252	0	1.27252	2.54505	0	5.09009	1.27252	0	0	3.81757	0	1.27252	0	0
		89000-89999	7.63514	1.27252	0	2.54505	1.27252	1.27252	0	0	2.54505	0	2.54505	0	0	0	5.09009	3.81757	0	1.27252	1.27252	0	2.54505	2.54505	2.54505	0	1.27252	1.27252	1.27252	1.27252	2.54505	0	0	3.81757	1.27252	0	0	0	0	1.27252	3.81757	0	1.27252	0	2.54505	0	2.54505	1.27252	0
		88000-88999	5.09009	6.36261	2.54505	0	0	2.54505	5.09009	0	2.54505	0	3.81757	2.54505	1.27252	2.54505	3.81757	0	0	1.27252	3.81757	0	0	3.81757	0	0	0	2.54505	1.27252	2.54505	1.27252	1.27252	0	0	2.54505	0	2.54505	1.27252	2.54505	0	0	0	3.81757	1.27252	2.54505	0	1.27252	1.27252	0
		87000-87999	2.54505	6.36261	5.09009	1.27252	1.27252	3.81757	0	0	2.54505	0	0	2.54505	2.54505	5.09009	1.27252	7.63514	1.27252	0	0	0	0	0	0	1.27252	0	2.54505	2.54505	0	0	3.81757	0	0	0	2.54505	0	0	0	3.81757	0	3.81757	0	0	3.81757	1.27252	5.09009	0	1.27252
		86000-86999	0	3.81757	1.27252	0	0	6.36261	0	2.54505	0	1.27252	0	0	0	1.27252	0	3.81757	2.54505	1.27252	0	7.63514	0	1.27252	2.54505	1.27252	5.09009	0	0	2.54505	1.27252	1.27252	1.27252	1.27252	5.09009	2.54505	1.27252	1.27252	0	2.54505	0	2.54505	2.54505	1.27252	0	0	0	0	1.27252
		85000-85999	8.90766	3.81757	0	1.27252	1.27252	1.27252	0	0	0	2.54505	3.81757	1.27252	0	0	1.27252	2.54505	2.54505	0	0	3.81757	1.27252	1.27252	0	1.27252	1.27252	0	0	1.27252	0	3.81757	0	2.54505	0	5.09009	0	0	0	0	0	1.27252	1.27252	1.27252	0	0	0	1.27252	1.27252
		84000-84999	15.2703	15.2703	1.27252	2.54505	0	0	3.81757	1.27252	0	1.27252	0	1.27252	0	2.54505	1.27252	0	0	0	0	0	1.27252	0	3.81757	1.27252	0	2.54505	1.27252	0	0	1.27252	0	0	5.09009	0	2.54505	0	1.27252	0	1.27252	1.27252	1.27252	1.27252	2.54505	12.7252	2.54505	0	0
		83000-83999	1.27252	3.81757	0	0	1.27252	0	1.27252	0	0	0	0	0	1.27252	0	0	0	2.54505	0	0	0	1.27252	0	0	1.27252	0	0	0	0	0	0	1.27252	1.27252	0	1.27252	0	0	3.81757	1.27252	0	0	1.27252	0	2.54505	2.54505	1.27252	0	0
		82000-82999	0	1.27252	3.81757	1.27252	2.54505	0	1.27252	1.27252	0	1.27252	0	2.54505	0	0	0	2.54505	0	0	1.27252	1.27252	0	0	0	0	0	1.27252	1.27252	0	1.27252	1.27252	1.27252	0	0	2.54505	0	2.54505	2.54505	0	0	1.27252	1.27252	0	3.81757	0	0	1.27252	2.54505
		81000-81999	0	0	0	0	1.27252	1.27252	0	1.27252	0	1.27252	1.27252	0	0	2.54505	1.27252	0	2.54505	0	1.27252	1.27252	0	1.27252	1.27252	0	0	0	1.27252	0	0	0	1.27252	0	0	1.27252	0	2.54505	1.27252	0	0	0	5.09009	2.54505	0	1.27252	0	0	0
		80000-80999	0	0	2.54505	0	0	0	1.27252	0	0	0	0	0	0	1.27252	2.54505	0	0	0	1.27252	0	0	1.27252	0	0	0	0	0	0	0	0	0	0	2.54505	2.54505	0	0	0	0	1.27252	1.27252	1.27252	0	1.27252	1.27252	0	0	0
		79000-79999	0	1.27252	0	0	0	1.27252	0	1.27252	0	1.27252	1.27252	1.27252	0	0	0	0	0	0	1.27252	0	3.81757	0	2.54505	0	0	1.27252	0	1.27252	1.27252	0	0	1.27252	2.54505	0	0	0	0	0	6.36261	0	0	1.27252	0	0	0	0	1.27252
		78000-78999	2.54505	0	0	0	2.54505	0	0	0	0	0	0	0	0	0	1.27252	0	1.27252	2.54505	0	0	3.81757	0	1.27252	0	1.27252	0	0	1.27252	1.27252	2.54505	2.54505	3.81757	1.27252	0	0	0	0	0	1.27252	0	0	0	2.54505	0	2.54505	0	3.81757
		77000-77999	0	0	1.27252	1.27252	0	0	1.27252	0	0	0	0	0	0	0	0	2.54505	1.27252	0	0	0	1.27252	2.54505	0	2.54505	0	0	0	0	0	1.27252	0	0	1.27252	0	0	0	0	0	0	0	0	0	0	0	0	6.36261	1.27252
		76000-76999	0	0	2.54505	2.54505	2.54505	0	0	0	0	1.27252	0	0	2.54505	0	1.27252	0	0	0	0	0	0	0	0	1.27252	0	0	2.54505	0	3.81757	0	2.54505	2.54505	2.54505	0	0	1.27252	0	0	1.27252	0	0	0	0	1.27252	1.27252	2.54505	2.54505
		75000-75999	0	0	0	0	2.54505	2.54505	0	0	1.27252	1.27252	0	0	0	1.27252	1.27252	3.81757	0	1.27252	0	1.27252	0	0	0	0	1.27252	0	2.54505	0	0	2.54505	0	5.09009	1.27252	0	3.81757	1.27252	0	1.27252	0	1.27252	0	2.54505	0	2.54505	1.27252	1.27252	2.54505
		74000-74999	1.27252	0	0	0	1.27252	0	1.27252	0	0	3.81757	0	0	0	1.27252	0	0	0	0	1.27252	0	0	5.09009	1.27252	0	0	0	3.81757	1.27252	0	0	0	0	2.54505	0	0	1.27252	0	0	2.54505	5.09009	2.54505	1.27252	1.27252	0	0	0	3.81757
		73000-73999	0	0	0	1.27252	0	1.27252	0	0	0	0	0	0	0	0	2.54505	3.81757	1.27252	1.27252	0	0	0	1.27252	0	1.27252	0	0	0	0	0	0	0	0	0	0	1.27252	1.27252	0	0	2.54505	0	3.81757	0	0	2.54505	0	0	0
		72000-72999	0	0	0	0	2.54505	0	0	0	0	0	0	0	0	0	13.9977	0	1.27252	0	0	0	0	2.54505	2.54505	1.27252	0	0	0	0	0	0	1.27252	0	3.81757	0	2.54505	0	0	5.09009	0	1.27252	0	0	1.27252	5.09009	0	5.09009	0
		71000-71999	0	0	2.54505	1.27252	0	0	0	3.81757	0	1.27252	0	1.27252	0	0	5.09009	1.27252	0	2.54505	1.27252	0	0	1.27252	0	0	0	0	1.27252	0	0	0	2.54505	1.27252	0	0	0	0	0	3.81757	0	1.27252	0	0	2.54505	1.27252	0	2.54505	2.54505
		70000-70999	1.27252	0	1.27252	0	0	0	0	1.27252	0	0	0	2.54505	0	2.54505	2.54505	0	1.27252	0	0	1.27252	1.27252	2.54505	1.27252	0	0	0	2.54505	0	0	1.27252	2.54505	1.27252	0	0	0	1.27252	1.27252	0	0	0	0	1.27252	0	0	0	1.27252	3.81757
		69000-69999	0	1.27252	0	0	0	3.81757	0	3.81757	0	0	0	0	1.27252	1.27252	1.27252	1.27252	0	0	0	1.27252	0	0	1.27252	0	2.54505	1.27252	0	0	0	2.54505	0	0	1.27252	0	1.27252	0	0	3.81757	0	3.81757	0	0	1.27252	0	1.27252	0	1.27252
		68000-68999	1.27252	0	2.54505	0	0	2.54505	3.81757	0	1.27252	2.54505	0	0	0	3.81757	0	1.27252	0	1.27252	2.54505	3.81757	0	1.27252	1.27252	1.27252	3.81757	0	1.27252	0	0	1.27252	0	1.27252	2.54505	0	1.27252	0	0	1.27252	0	1.27252	0	0	1.27252	3.81757	0	2.54505	10.1802
		67000-67999	0	0	0	2.54505	0	0	0	0	0	2.54505	0	3.81757	0	2.54505	1.27252	0	0	2.54505	0	2.54505	0	0	1.27252	0	0	0	0	0	1.27252	2.54505	0	1.27252	0	0	1.27252	1.27252	0	1.27252	0	0	0	0	1.27252	0	0	1.27252	0
		66000-66999	2.54505	0	0	2.54505	2.54505	0	0	3.81757	2.54505	2.54505	0	0	2.54505	1.27252	2.54505	0	0	2.54505	0	0	1.27252	0	1.27252	0	0	2.54505	1.27252	0	8.90766	2.54505	3.81757	7.63514	1.27252	0	0	2.54505	2.54505	0	2.54505	1.27252	0	0	5.09009	2.54505	2.54505	0	8.90766
		65000-65999	0	0	0	2.54505	0	0	1.27252	7.63514	2.54505	1.27252	0	0	5.09009	5.09009	0	0	1.27252	1.27252	0	0	0	1.27252	1.27252	0	2.54505	0	2.54505	5.09009	1.27252	1.27252	5.09009	5.09009	2.54505	0	0	0	1.27252	1.27252	5.09009	0	0	2.54505	7.63514	5.09009	0	0	3.81757
		64000-64999	2.54505	3.81757	3.81757	0	2.54505	0	1.27252	0	0	1.27252	1.27252	0	2.54505	2.54505	2.54505	0	0	2.54505	0	1.27252	0	1.27252	0	1.27252	0	1.27252	2.54505	0	1.27252	0	0	0	2.54505	0	2.54505	2.54505	1.27252	0	0	2.54505	1.27252	2.54505	1.27252	0	2.54505	1.27252	3.81757
		63000-63999	0	1.27252	0	1.27252	1.27252	1.27252	0	0	0	0	1.27252	0	0	0	3.81757	0	1.27252	1.27252	0	1.27252	0	0	0	0	1.27252	0	1.27252	0	0	1.27252	1.27252	1.27252	2.54505	0	1.27252	1.27252	0	1.27252	0	0	1.27252	0	0	0	1.27252	1.27252	1.27252
		62000-62999	1.27252	0	1.27252	0	1.27252	0	0	1.27252	0	2.54505	0	0	0	0	6.36261	0	0	1.27252	0	2.54505	0	2.54505	0	0	0	0	1.27252	0	1.27252	2.54505	0	0	5.09009	0	0	3.81757	0	0	0	1.27252	0	0	2.54505	1.27252	3.81757	2.54505	0
		61000-61999	1.27252	0	0	1.27252	0	1.27252	0	0	0	0	5.09009	0	0	1.27252	2.54505	0	1.27252	0	0	0	1.27252	0	1.27252	0	1.27252	0	0	0	0	1.27252	0	5.09009	0	0	2.54505	0	2.54505	0	0	0	1.27252	0	1.27252	6.36261	2.54505	2.54505	0
		60000-60999	0	0	0	0	2.54505	2.54505	0	1.27252	0	0	0	0	0	0	1.27252	0	0	1.27252	0	0	1.27252	1.27252	0	1.27252	0	1.27252	0	0	0	3.81757	1.27252	0	0	0	0	0	1.27252	0	0	0	0	0	3.81757	3.81757	0	1.27252	0
		59000-59999	0	1.27252	0	3.81757	0	3.81757	0	0	0	6.36261	0	0	1.27252	1.27252	0	1.27252	0	1.27252	0	0	0	0	1.27252	0	0	1.27252	1.27252	0	1.27252	3.81757	2.54505	6.36261	0	0	1.27252	0	0	0	0	0	0	3.81757	2.54505	1.27252	2.54505	3.81757	1.27252
		58000-58999	1.27252	1.27252	0	0	7.63514	2.54505	0	1.27252	2.54505	1.27252	0	1.27252	0	0	0	0	1.27252	0	0	0	0	0	1.27252	0	0	1.27252	0	0	0	2.54505	1.27252	3.81757	7.63514	1.27252	5.09009	0	0	0	0	0	0	0	0	0	0	2.54505	1.27252
		57000-57999	0	0	1.27252	0	1.27252	0	2.54505	3.81757	2.54505	2.54505	0	0	0	0	0	0	0	1.27252	1.27252	0	1.27252	3.81757	2.54505	5.09009	0	0	0	0	1.27252	0	0	2.54505	2.54505	1.27252	1.27252	1.27252	1.27252	1.27252	0	1.27252	2.54505	0	0	0	0	0	1.27252
		56000-56999	0	0	0	1.27252	0	0	1.27252	0	0	0	1.27252	0	1.27252	2.54505	1.27252	0	1.27252	0	0	1.27252	0	2.54505	0	0	0	0	0	0	0	1.27252	0	1.27252	1.27252	1.27252	0	0	1.27252	0	1.27252	0	0	1.27252	1.27252	2.54505	5.09009	0	2.54505
		55000-55999	0	0	1.27252	0	1.27252	0	0	1.27252	0	3.81757	1.27252	1.27252	0	0	1.27252	2.54505	0	0	0	1.27252	0	0	1.27252	0	0	0	0	0	2.54505	0	0	1.27252	0	0	0	1.27252	2.54505	1.27252	0	2.54505	2.54505	0	0	0	0	0	1.27252
		54000-54999	0	1.27252	1.27252	1.27252	0	0	0	0	1.27252	0	0	0	0	1.27252	7.63514	1.27252	0	0	0	1.27252	0	1.27252	2.54505	2.54505	0	1.27252	3.81757	2.54505	1.27252	1.27252	0	5.09009	1.27252	1.27252	2.54505	1.27252	0	1.27252	0	1.27252	0	1.27252	1.27252	1.27252	0	2.54505	0
		53000-53999	0	0	0	0	0	0	0	0	0	0	0	0	0	0	0	0	0	0	0	0	2.54505	1.27252	0	2.54505	2.54505	0	0	0	0	0	0	2.54505	0	2.54505	3.81757	0	0	1.27252	1.27252	0	6.36261	0	1.27252	1.27252	1.27252	0	0
		52000-52999	0	0	0	0	1.27252	0	0	0	0	0	0	1.27252	0	2.54505	0	0	1.27252	0	1.27252	2.54505	0	0	0	2.54505	1.27252	0	0	0	0	0	1.27252	8.90766	0	0	0	2.54505	0	0	0	0	0	2.54505	3.81757	2.54505	0	1.27252	1.27252
		51000-51999	0	0	3.81757	2.54505	2.54505	0	1.27252	2.54505	0	1.27252	0	0	2.54505	0	1.27252	0	0	0	0	0	1.27252	1.27252	2.54505	1.27252	1.27252	0	0	1.27252	0	1.27252	0	7.63514	1.27252	1.27252	0	0	0	1.27252	2.54505	0	0	0	0	6.36261	0	2.54505	0
		50000-50999	0	0	0	1.27252	2.54505	0	0	1.27252	1.27252	1.27252	1.27252	1.27252	0	1.27252	0	2.54505	1.27252	2.54505	0	0	0	0	1.27252	0	1.27252	0	0	0	0	1.27252	1.27252	2.54505	2.54505	1.27252	0	0	1.27252	0	1.27252	0	0	1.27252	1.27252	8.90766	0	0	5.09009
		49000-49999	1.27252	3.81757	0	1.27252	0	1.27252	1.27252	1.27252	0	0	0	0	0	0	2.54505	0	0	1.27252	1.27252	0	0	0	3.81757	3.81757	1.27252	0	3.81757	0	2.54505	2.54505	2.54505	7.63514	0	0	1.27252	1.27252	0	2.54505	1.27252	2.54505	0	0	0	0	1.27252	11.4527	2.54505
		48000-48999	0	3.81757	0	0	6.36261	0	0	1.27252	0	0	1.27252	0	0	0	1.27252	2.54505	0	0	0	0	1.27252	1.27252	0	1.27252	0	1.27252	0	1.27252	0	1.27252	1.27252	1.27252	1.27252	0	0	0	5.09009	1.27252	0	1.27252	1.27252	0	1.27252	0	1.27252	0	2.54505
		47000-47999	0	0	0	0	0	0	1.27252	2.54505	0	0	0	0	1.27252	0	0	0	0	0	0	2.54505	0	0	0	0	0	0	0	0	1.27252	0	0	0	5.09009	0	0	0	0	0	0	0	0	0	2.54505	0	19.0878	1.27252	8.90766
		46000-46999	2.54505	2.54505	1.27252	0	2.54505	0	0	0	1.27252	3.81757	1.27252	0	1.27252	0	0	0	0	2.54505	0	0	3.81757	1.27252	1.27252	0	0	0	0	1.27252	2.54505	2.54505	12.7252	5.09009	6.36261	0	3.81757	2.54505	5.09009	2.54505	1.27252	1.27252	0	0	2.54505	0	3.81757	3.81757	25.4505
		45000-45999	0	0	0	0	0	0	0	3.81757	1.27252	1.27252	2.54505	1.27252	0	0	1.27252	0	0	0	0	2.54505	3.81757	1.27252	2.54505	1.27252	2.54505	0	0	5.09009	1.27252	1.27252	6.36261	1.27252	8.90766	1.27252	1.27252	1.27252	1.27252	2.54505	0	0	0	7.63514	2.54505	7.63514	10.1802	30.5405
		44000-44999	0	1.27252	0	1.27252	0	0	0	3.81757	0	0	1.27252	1.27252	1.27252	0	0	0	0	0	2.54505	0	3.81757	0	1.27252	0	0	0	8.90766	0	6.36261	2.54505	2.54505	10.1802	0	6.36261	0	6.36261	0	1.27252	1.27252	0	1.27252	2.54505	0	21.6329	10.1802
		43000-43999	0	0	0	0	0	1.27252	0	0	0	1.27252	0	0	2.54505	0	0	1.27252	1.27252	0	0	0	0	2.54505	0	0	0	1.27252	1.27252	0	0	0	1.27252	2.54505	2.54505	0	0	1.27252	0	0	1.27252	0	1.27252	2.54505	5.09009	43.2658
		42000-42999	0	0	0	1.27252	0	1.27252	0	0	3.81757	1.27252	0	1.27252	0	1.27252	0	0	0	0	1.27252	0	2.54505	3.81757	0	2.54505	0	0	0	0	1.27252	5.09009	5.09009	3.81757	11.4527	0	2.54505	1.27252	3.81757	1.27252	0	0	2.54505	1.27252	33.0856
		41000-41999	0	0	0	1.27252	0	0	0	0	0	1.27252	1.27252	1.27252	0	1.27252	1.27252	1.27252	2.54505	0	0	0	0	1.27252	0	2.54505	0	2.54505	0	0	0	0	0	0	2.54505	2.54505	0	1.27252	1.27252	1.27252	7.63514	2.54505	10.1802	15.2703
		40000-40999	0	1.27252	0	0	1.27252	0	0	0	0	0	3.81757	0	0	2.54505	2.54505	1.27252	0	0	0	1.27252	0	1.27252	1.27252	1.27252	0	0	2.54505	1.27252	3.81757	3.81757	0	1.27252	0	0	0	1.27252	0	20.3604	30.5405	13.9977	19.0878
		39000-39999	0	0	0	0	0	1.27252	2.54505	0	0	0	0	5.09009	0	0	3.81757	0	1.27252	1.27252	0	1.27252	0	0	1.27252	0	1.27252	0	1.27252	0	0	0	1.27252	1.27252	8.90766	1.27252	0	2.54505	5.09009	35.6306	26.723	16.5428
		38000-38999	0	0	0	0	0	0	0	0	0	1.27252	0	2.54505	1.27252	0	0	3.81757	1.27252	0	0	1.27252	1.27252	0	0	0	0	2.54505	0	1.27252	0	0	0	1.27252	2.54505	0	0	1.27252	5.09009	6.36261	21.6329
		37000-37999	0	0	0	0	0	0	0	0	0	0	1.27252	0	0	0	2.54505	0	1.27252	0	1.27252	1.27252	0	0	0	1.27252	1.27252	0	0	0	0	0	3.81757	0	1.27252	1.27252	2.54505	1.27252	8.90766	76.3514
		36000-36999	1.27252	1.27252	1.27252	1.27252	2.54505	0	5.09009	0	0	0	0	0	3.81757	0	2.54505	0	0	1.27252	0	0	0	1.27252	2.54505	0	0	0	0	0	1.27252	0	3.81757	3.81757	8.90766	2.54505	1.27252	11.4527	16.5428
		35000-35999	0	1.27252	0	1.27252	2.54505	1.27252	2.54505	2.54505	0	0	0	2.54505	1.27252	0	0	0	0	1.27252	0	0	0	0	1.27252	6.36261	0	0	1.27252	0	0	1.27252	0	1.27252	3.81757	3.81757	6.36261	19.0878
		34000-34999	1.27252	0	0	0	0	1.27252	1.27252	0	0	2.54505	0	0	0	0	0	1.27252	0	1.27252	0	0	0	1.27252	1.27252	0	0	0	0	0	0	0	0	0	1.27252	6.36261	27.9955
		33000-33999	0	0	0	0	0	1.27252	1.27252	0	0	1.27252	1.27252	1.27252	1.27252	1.27252	0	0	0	0	0	0	0	0	1.27252	0	0	0	2.54505	0	2.54505	0	0	0	10.1802	12.7252
		32000-32999	0	1.27252	0	0	1.27252	1.27252	2.54505	0	6.36261	3.81757	1.27252	7.63514	2.54505	1.27252	2.54505	0	0	0	0	0	2.54505	0	2.54505	1.27252	0	0	1.27252	2.54505	0	16.5428	3.81757	43.2658	22.9054
		31000-31999	2.54505	1.27252	1.27252	1.27252	2.54505	1.27252	0	1.27252	1.27252	0	0	0	0	0	3.81757	0	0	2.54505	1.27252	0	5.09009	0	0	3.81757	0	2.54505	0	1.27252	0	3.81757	40.7207	26.723
		30000-30999	0	3.81757	1.27252	0	7.63514	0	2.54505	1.27252	0	5.09009	0	1.27252	1.27252	1.27252	1.27252	0	0	0	3.81757	0	0	5.09009	0	5.09009	1.27252	2.54505	0	1.27252	3.81757	7.63514	26.723
		29000-29999	0	0	0	0	0	0	0	2.54505	2.54505	2.54505	2.54505	6.36261	1.27252	0	0	1.27252	1.27252	1.27252	8.90766	0	0	2.54505	1.27252	0	0	1.27252	5.09009	10.1802	6.36261	30.5405
		28000-28999	0	1.27252	0	1.27252	1.27252	1.27252	0	1.27252	2.54505	0	2.54505	2.54505	0	0	11.4527	1.27252	0	6.36261	2.54505	0	1.27252	0	0	5.09009	0	1.27252	2.54505	12.7252	12.7252
		27000-27999	0	0	2.54505	0	0	0	10.1802	0	1.27252	2.54505	2.54505	3.81757	1.27252	1.27252	3.81757	1.27252	2.54505	2.54505	2.54505	0	0	0	0	2.54505	0	0	24.1779	31.8131
		26000-26999	0	0	1.27252	1.27252	2.54505	0	0	5.09009	0	5.09009	2.54505	5.09009	1.27252	1.27252	6.36261	0	1.27252	3.81757	5.09009	0	6.36261	0	1.27252	3.81757	3.81757	12.7252	50.9009
		25000-25999	0	0	0	0	1.27252	8.90766	2.54505	2.54505	0	0	0	3.81757	5.09009	2.54505	1.27252	2.54505	0	0	0	0	1.27252	0	2.54505	0	3.81757	24.1779
		24000-24999	2.54505	1.27252	0	0	0	0	0	0	0	1.27252	2.54505	5.09009	1.27252	7.63514	1.27252	1.27252	0	0	1.27252	0	5.09009	0	1.27252	8.90766	26.723
		23000-23999	0	2.54505	0	1.27252	0	1.27252	0	0	0	2.54505	2.54505	0	2.54505	0	5.09009	0	0	1.27252	1.27252	1.27252	2.54505	0	3.81757	66.1712
		22000-22999	1.27252	0	0	0	1.27252	1.27252	0	2.54505	0	22.9054	0	0	0	0	0	3.81757	0	1.27252	1.27252	1.27252	6.36261	3.81757	31.8131
		21000-21999	0	3.81757	0	3.81757	0	2.54505	0	2.54505	0	0	1.27252	2.54505	0	0	2.54505	0	1.27252	0	3.81757	1.27252	2.54505	48.3559
		20000-20999	1.27252	0	0	0	0	0	3.81757	2.54505	0	2.54505	0	3.81757	1.27252	5.09009	1.27252	0	0	0	0	6.36261	24.1779
		19000-19999	0	0	0	1.27252	1.27252	2.54505	0	0	0	1.27252	0	2.54505	3.81757	0	0	0	0	7.63514	6.36261	22.9054
		18000-18999	0	0	0	0	0	0	0	1.27252	0	0	0	2.54505	2.54505	0	1.27252	0	0	2.54505	26.723
		17000-17999	0	0	0	1.27252	3.81757	1.27252	0	2.54505	0	1.27252	3.81757	0	2.54505	2.54505	0	5.09009	7.63514	25.4505
		16000-16999	0	0	1.27252	0	0	16.5428	1.27252	0	1.27252	1.27252	0	0	0	1.27252	5.09009	11.4527	26.723
		15000-15999	0	0	0	0	2.54505	5.09009	2.54505	1.27252	0	0	3.81757	1.27252	0	2.54505	10.1802	12.7252
		14000-14999	0	1.27252	3.81757	3.81757	1.27252	0	5.09009	0	2.54505	3.81757	0	6.36261	2.54505	6.36261	16.5428
		13000-13999	1.27252	1.27252	0	3.81757	1.27252	1.27252	0	0	0	1.27252	3.81757	10.1802	12.7252	20.3604
		12000-12999	0	1.27252	0	1.27252	3.81757	0	0	1.27252	0	1.27252	2.54505	30.5405	39.4482
		11000-11999	2.54505	0	0	0	0	0	1.27252	0	2.54505	2.54505	3.81757	27.9955
		10000-10999	1.27252	0	0	0	0	0	0	0	0	8.90766	44.5383
		9000-9999	0	0	1.27252	0	2.54505	0	1.27252	2.54505	6.36261	19.0878
		8000-8999	0	1.27252	2.54505	1.27252	2.54505	0	1.27252	21.6329	40.7207
		7000-7999	2.54505	0	1.27252	0	11.4527	8.90766	8.90766	44.5383
		6000-6999	0	1.27252	0	0	6.36261	7.63514	33.0856
		5000-5999	1.27252	0	0	0	5.09009	19.0878
		4000-4999	0	3.81757	3.81757	6.36261	17.8153
		3000-3999	0	12.7252	26.723	64.8986
		2000-2999	0	15.2703	20.3604
		1000-1999	11.4527	22.9054
		0-999	12.7252
[truncated: 82 more columns]

## Sheet: Supp. Table S22
Rearrangement junctions per position per 10000 plastid genomes in A. thaliana why1why3reca1
Organism		Genome Positions	0-999	1000-1999	2000-2999	3000-3999	4000-4999	5000-5999	6000-6999	7000-7999	8000-8999	9000-9999	10000-10999	11000-11999	12000-12999	13000-13999	14000-14999	15000-15999	16000-16999	17000-17999	18000-18999	19000-19999	20000-20999	21000-21999	22000-22999	23000-23999	24000-24999	25000-25999	26000-26999	27000-27999	28000-28999	29000-29999	30000-30999	31000-31999	32000-32999	33000-33999	34000-34999	35000-35999	36000-36999	37000-37999	38000-38999	39000-39999	40000-40999	41000-41999	42000-42999	43000-43999	44000-44999	45000-45999	46000-46999
A.thaliana		128000-128214	0	0	0	0	0	0	0	0	0	0	0	0	0	0	0	0	0	0	0	0	0	0	0	0	0	1.24456	0	0	0	0	0	0	0	0	0	0	0	0	0	0	0	0	0	0	0	0	0
Genome		127000-127999	1.24456	0	0	2.48911	2.48911	0	0	4.97822	0	4.97822	0	0	3.73367	2.48911	8.71189	0	1.24456	1.24456	0	1.24456	0	0	1.24456	2.48911	0	2.48911	1.24456	2.48911	2.48911	1.24456	2.48911	1.24456	1.24456	1.24456	1.24456	1.24456	4.97822	0	0	1.24456	0	0	1.24456	0	0	0	0
Plastid		126000-126999	0	1.24456	1.24456	1.24456	1.24456	0	3.73367	0	1.24456	0	1.24456	3.73367	1.24456	0	3.73367	0	0	0	0	0	0	1.24456	1.24456	1.24456	2.48911	0	0	2.48911	0	0	2.48911	1.24456	0	0	0	1.24456	0	2.48911	0	0	0	0	3.73367	0	0	0	0
Line		125000-125999	1.24456	0	0	0	1.24456	0	1.24456	4.97822	0	1.24456	1.24456	2.48911	1.24456	0	2.48911	0	0	2.48911	0	0	3.73367	2.48911	0	0	2.48911	1.24456	0	0	0	0	3.73367	2.48911	1.24456	0	0	1.24456	0	2.48911	0	0	0	0	0	2.48911	1.24456	4.97822	1.24456
Col-0		124000-124999	2.48911	7.46734	0	2.48911	4.97822	3.73367	1.24456	2.48911	0	1.24456	0	2.48911	0	0	2.48911	0	0	0	0	0	0	0	1.24456	0	3.73367	0	2.48911	1.24456	0	2.48911	2.48911	3.73367	2.48911	0	0	2.48911	0	2.48911	0	4.97822	0	4.97822	1.24456	3.73367	4.97822	6.22278	2.48911
Mutations		123000-123999	0	2.48911	0	8.71189	0	2.48911	1.24456	0	1.24456	0	4.97822	3.73367	1.24456	0	1.24456	0	1.24456	0	0	0	0	1.24456	0	0	0	0	2.48911	1.24456	0	1.24456	0	0	2.48911	1.24456	0	0	2.48911	0	0	0	0	0	0	0	1.24456	0	1.24456
why1why3reca1		122000-122999	4.97822	0	0	0	1.24456	0	0	2.48911	0	0	0	2.48911	1.24456	2.48911	0	2.48911	0	0	0	0	0	1.24456	0	0	0	0	0	0	1.24456	0	0	0	0	0	0	1.24456	0	1.24456	0	0	0	0	3.73367	0	1.24456	0	0
Total Reads		121000-121999	2.48911	0	0	1.24456	0	1.24456	0	1.24456	0	0	0	0	0	2.48911	8.71189	1.24456	0	3.73367	0	0	0	1.24456	0	1.24456	0	0	0	0	0	0	0	2.48911	0	2.48911	0	0	1.24456	0	2.48911	0	0	2.48911	1.24456	1.24456	0	0	0
12412296		120000-120999	0	0	3.73367	1.24456	0	1.24456	1.24456	1.24456	0	0	2.48911	0	0	1.24456	2.48911	0	0	2.48911	0	0	1.24456	1.24456	2.48911	0	3.73367	0	3.73367	1.24456	1.24456	0	0	3.73367	1.24456	0	0	0	1.24456	0	0	2.48911	0	0	0	0	0	0	0
Total Bases		119000-119999	0	2.48911	2.48911	9.95645	3.73367	1.24456	0	0	0	3.73367	0	0	2.48911	0	0	0	0	1.24456	0	0	0	0	3.73367	1.24456	2.48911	0	4.97822	1.24456	1.24456	0	0	0	0	1.24456	0	0	0	0	0	0	0	0	0	0	2.48911	2.48911	2.48911
1241229600		118000-118999	1.24456	0	1.24456	1.24456	0	17.4238	2.48911	2.48911	0	2.48911	0	11.201	1.24456	0	0	1.24456	0	2.48911	2.48911	1.24456	0	0	0	1.24456	0	0	1.24456	0	2.48911	1.24456	3.73367	1.24456	1.24456	0	0	1.24456	4.97822	2.48911	0	1.24456	0	3.73367	0	1.24456	0	1.24456	2.48911
Genome Size		117000-117999	0	0	0	0	0	0	0	1.24456	1.24456	0	0	0	0	0	2.48911	0	0	0	1.24456	0	0	0	2.48911	2.48911	0	0	0	0	0	0	1.24456	0	0	0	0	0	0	0	0	0	2.48911	2.48911	1.24456	0	1.24456	1.24456	0
154478		116000-116999	1.24456	1.24456	2.48911	0	0	0	0	1.24456	0	0	0	2.48911	0	0	6.22278	1.24456	3.73367	0	0	0	0	0	0	0	0	0	0	0	1.24456	0	0	0	3.73367	0	3.73367	0	0	0	0	0	0	1.24456	0	0	0	1.24456	0
Multiplier		115000-115999	2.48911	1.24456	2.48911	4.97822	6.22278	0	2.48911	4.97822	2.48911	0	0	3.73367	1.24456	2.48911	6.22278	0	2.48911	1.24456	0	0	0	1.24456	0	0	1.24456	2.48911	2.48911	4.97822	1.24456	1.24456	0	1.24456	1.24456	0	2.48911	0	0	0	0	0	2.48911	1.24456	1.24456	0	0	2.48911	1.24456
1.24456		114000-114999	1.24456	2.48911	2.48911	1.24456	0	0	0	0	1.24456	0	0	2.48911	2.48911	0	0	0	0	0	0	1.24456	0	0	0	1.24456	1.24456	0	0	0	0	0	2.48911	0	0	0	0	1.24456	0	0	0	0	1.24456	0	1.24456	2.48911	0	0	1.24456
		113000-113999	0	0	2.48911	3.73367	8.71189	0	0	0	0	1.24456	0	0	0	0	1.24456	1.24456	1.24456	0	0	0	0	0	0	0	2.48911	0	2.48911	1.24456	0	0	0	0	4.97822	0	0	0	7.46734	0	2.48911	0	0	0	0	1.24456	1.24456	0	1.24456
Color Scale		112000-112999	1.24456	14.9347	1.24456	0	0	0	3.73367	0	1.24456	1.24456	0	0	0	7.46734	0	0	1.24456	0	0	1.24456	1.24456	2.48911	1.24456	0	2.48911	6.22278	1.24456	2.48911	1.24456	0	0	2.48911	1.24456	2.48911	0	0	0	1.24456	1.24456	1.24456	0	1.24456	3.73367	0	1.24456	0	0
0		111000-111999	0	3.73367	4.97822	4.97822	0	1.24456	2.48911	1.24456	0	0	0	2.48911	0	0	1.24456	2.48911	1.24456	2.48911	0	2.48911	1.24456	0	2.48911	9.95645	1.24456	0	1.24456	1.24456	2.48911	0	0	0	2.48911	0	0	0	0	0	1.24456	0	0	1.24456	0	0	0	3.73367	1.24456
1		110000-110999	0	0	1.24456	1.24456	8.71189	1.24456	0	1.24456	3.73367	1.24456	0	0	2.48911	3.73367	0	2.48911	0	0	1.24456	0	7.46734	2.48911	0	2.48911	2.48911	0	3.73367	1.24456	3.73367	3.73367	0	0	0	2.48911	1.24456	0	0	0	0	0	0	0	3.73367	0	3.73367	0	3.73367
2		109000-109999	3.73367	8.71189	2.48911	6.22278	1.24456	6.22278	6.22278	0	0	1.24456	3.73367	1.24456	1.24456	1.24456	1.24456	3.73367	0	1.24456	0	1.24456	0	0	4.97822	7.46734	0	2.48911	3.73367	0	4.97822	2.48911	1.24456	1.24456	3.73367	1.24456	0	0	0	1.24456	1.24456	1.24456	1.24456	1.24456	1.24456	1.24456	1.24456	2.48911	2.48911
3		108000-108999	0	0	1.24456	4.97822	2.48911	3.73367	6.22278	3.73367	0	0	4.97822	0	0	1.24456	11.201	1.24456	1.24456	2.48911	2.48911	1.24456	0	0	1.24456	1.24456	0	1.24456	4.97822	0	1.24456	0	1.24456	2.48911	0	0	0	0	0	1.24456	0	1.24456	0	0	0	2.48911	0	1.24456	0
4		107000-107999	0	8.71189	1.24456	1.24456	2.48911	1.24456	0	1.24456	0	0	0	1.24456	0	0	3.73367	0	0	1.24456	0	0	0	0	0	4.97822	1.24456	1.24456	0	0	1.24456	0	0	1.24456	1.24456	4.97822	1.24456	0	0	0	0	1.24456	0	3.73367	0	0	0	0	0
5		106000-106999	1.24456	0	2.48911	1.24456	0	0	3.73367	6.22278	0	0	1.24456	1.24456	0	0	0	0	0	0	2.48911	0	0	0	1.24456	1.24456	0	2.48911	0	1.24456	0	0	1.24456	0	0	0	0	0	0	0	4.97822	0	0	1.24456	0	0	0	2.48911	0
6		105000-105999	0	0	1.24456	0	0	0	0	0	1.24456	0	1.24456	0	0	0	0	1.24456	0	1.24456	0	0	0	0	1.24456	0	2.48911	2.48911	0	0	0	0	1.24456	1.24456	0	0	0	0	0	0	0	2.48911	1.24456	0	0	0	0	0	0
7		104000-104999	1.24456	2.48911	1.24456	0	0	1.24456	0	0	0	0	4.97822	0	0	2.48911	1.24456	1.24456	0	0	1.24456	0	1.24456	1.24456	0	3.73367	0	2.48911	0	1.24456	0	0	0	1.24456	0	2.48911	0	0	0	1.24456	0	0	0	0	2.48911	0	0	0	0
8		103000-103999	2.48911	0	1.24456	1.24456	1.24456	2.48911	2.48911	0	1.24456	0	0	0	0	0	2.48911	1.24456	2.48911	1.24456	1.24456	3.73367	1.24456	0	1.24456	1.24456	0	1.24456	0	1.24456	2.48911	0	1.24456	3.73367	2.48911	0	0	0	0	3.73367	3.73367	1.24456	4.97822	1.24456	1.24456	3.73367	1.24456	0	0
9		102000-102999	0	0	1.24456	0	1.24456	0	1.24456	1.24456	0	0	0	0	0	0	0	1.24456	0	2.48911	1.24456	1.24456	2.48911	0	0	0	1.24456	0	0	2.48911	0	1.24456	0	1.24456	0	0	0	1.24456	0	0	0	0	0	0	0	0	0	0	0
10		101000-101999	2.48911	0	4.97822	4.97822	0	1.24456	0	1.24456	1.24456	0	1.24456	0	1.24456	3.73367	0	2.48911	0	0	0	2.48911	0	6.22278	0	0	2.48911	2.48911	0	0	0	0	0	0	0	0	2.48911	0	0	0	1.24456	2.48911	0	0	0	0	1.24456	1.24456	0
11		100000-100999	1.24456	6.22278	2.48911	2.48911	1.24456	3.73367	0	2.48911	3.73367	2.48911	0	1.24456	1.24456	0	2.48911	0	0	3.73367	0	0	0	0	2.48911	1.24456	2.48911	0	0	0	2.48911	2.48911	1.24456	2.48911	0	0	0	0	1.24456	0	6.22278	0	0	0	1.24456	0	0	1.24456	2.48911
12		99000-99999	1.24456	1.24456	2.48911	0	1.24456	0	1.24456	0	1.24456	1.24456	0	0	0	0	1.24456	0	1.24456	1.24456	0	1.24456	1.24456	2.48911	1.24456	0	0	3.73367	0	1.24456	2.48911	1.24456	0	0	2.48911	0	0	0	3.73367	0	2.48911	0	0	1.24456	0	2.48911	0	0	3.73367
13		98000-98999	1.24456	0	0	1.24456	17.4238	4.97822	2.48911	12.4456	1.24456	0	2.48911	2.48911	0	3.73367	0	1.24456	1.24456	1.24456	0	1.24456	0	0	0	1.24456	0	2.48911	3.73367	0	1.24456	0	0	0	0	0	0	1.24456	0	0	0	4.97822	0	2.48911	0	1.24456	0	2.48911	0
14		97000-97999	4.97822	2.48911	2.48911	2.48911	2.48911	3.73367	2.48911	0	1.24456	2.48911	2.48911	1.24456	1.24456	0	0	1.24456	0	2.48911	0	2.48911	3.73367	0	1.24456	2.48911	0	0	3.73367	4.97822	0	0	2.48911	0	0	4.97822	2.48911	1.24456	2.48911	4.97822	0	1.24456	2.48911	0	6.22278	0	0	1.24456	2.48911
15		96000-96999	0	0	1.24456	2.48911	0	1.24456	1.24456	1.24456	0	0	1.24456	1.24456	1.24456	1.24456	4.97822	1.24456	1.24456	0	2.48911	0	0	0	0	0	0	1.24456	1.24456	1.24456	2.48911	3.73367	0	0	0	0	0	2.48911	0	0	0	2.48911	0	1.24456	4.97822	1.24456	1.24456	2.48911	0
		95000-95999	1.24456	2.48911	1.24456	0	1.24456	0	2.48911	3.73367	6.22278	3.73367	3.73367	2.48911	1.24456	0	2.48911	1.24456	0	1.24456	0	2.48911	3.73367	1.24456	0	3.73367	0	0	2.48911	1.24456	1.24456	1.24456	0	0	0	0	0	0	0	1.24456	6.22278	0	1.24456	3.73367	0	0	2.48911	0	0
		94000-94999	0	2.48911	0	13.6901	0	0	0	3.73367	1.24456	2.48911	1.24456	1.24456	0	6.22278	6.22278	1.24456	0	0	0	1.24456	2.48911	7.46734	0	1.24456	6.22278	0	2.48911	0	1.24456	0	1.24456	0	0	3.73367	1.24456	0	1.24456	4.97822	2.48911	1.24456	1.24456	0	1.24456	1.24456	8.71189	4.97822	0
		93000-93999	2.48911	1.24456	1.24456	1.24456	7.46734	3.73367	2.48911	0	0	0	8.71189	1.24456	4.97822	0	3.73367	1.24456	6.22278	0	2.48911	1.24456	1.24456	2.48911	2.48911	12.4456	4.97822	2.48911	0	0	2.48911	0	2.48911	0	1.24456	0	0	3.73367	0	0	3.73367	1.24456	2.48911	1.24456	0	1.24456	1.24456	1.24456	1.24456
		92000-92999	6.22278	2.48911	4.97822	3.73367	4.97822	3.73367	0	2.48911	0	4.97822	2.48911	0	3.73367	2.48911	27.3802	3.73367	3.73367	2.48911	4.97822	2.48911	1.24456	3.73367	2.48911	1.24456	0	3.73367	0	3.73367	1.24456	0	1.24456	2.48911	1.24456	4.97822	7.46734	2.48911	1.24456	3.73367	0	4.97822	2.48911	0	0	2.48911	0	2.48911	1.24456
		91000-91999	1.24456	3.73367	2.48911	6.22278	1.24456	1.24456	0	3.73367	3.73367	0	8.71189	13.6901	0	3.73367	7.46734	0	4.97822	7.46734	2.48911	1.24456	0	2.48911	3.73367	2.48911	0	2.48911	7.46734	3.73367	3.73367	0	0	1.24456	4.97822	0	0	4.97822	2.48911	2.48911	1.24456	2.48911	2.48911	0	0	1.24456	2.48911	0	2.48911
		90000-90999	0	4.97822	1.24456	1.24456	0	1.24456	6.22278	8.71189	1.24456	3.73367	0	1.24456	2.48911	3.73367	1.24456	2.48911	3.73367	4.97822	0	4.97822	1.24456	3.73367	3.73367	2.48911	0	3.73367	0	0	1.24456	0	0	2.48911	0	0	0	1.24456	1.24456	2.48911	0	1.24456	0	0	1.24456	0	2.48911	2.48911	1.24456
		89000-89999	4.97822	1.24456	1.24456	2.48911	2.48911	2.48911	3.73367	0	1.24456	1.24456	0	1.24456	0	0	3.73367	2.48911	3.73367	0	1.24456	0	1.24456	3.73367	0	0	0	4.97822	2.48911	4.97822	0	0	1.24456	0	2.48911	1.24456	0	1.24456	0	0	0	0	0	0	1.24456	14.9347	0	0	0
		88000-88999	6.22278	1.24456	0	6.22278	2.48911	2.48911	3.73367	2.48911	0	1.24456	2.48911	1.24456	0	2.48911	0	0	1.24456	0	0	1.24456	0	6.22278	14.9347	2.48911	0	1.24456	0	3.73367	0	1.24456	1.24456	1.24456	1.24456	1.24456	1.24456	2.48911	2.48911	0	0	0	1.24456	2.48911	1.24456	1.24456	1.24456	2.48911	2.48911
		87000-87999	1.24456	2.48911	1.24456	3.73367	6.22278	2.48911	0	3.73367	2.48911	1.24456	0	1.24456	0	4.97822	2.48911	2.48911	0	2.48911	9.95645	0	1.24456	0	1.24456	2.48911	3.73367	3.73367	4.97822	0	0	0	0	1.24456	0	0	0	1.24456	0	2.48911	0	2.48911	1.24456	1.24456	0	3.73367	2.48911	7.46734	2.48911
		86000-86999	2.48911	2.48911	3.73367	2.48911	3.73367	6.22278	1.24456	0	3.73367	0	6.22278	1.24456	1.24456	4.97822	1.24456	0	1.24456	3.73367	1.24456	0	3.73367	0	2.48911	2.48911	1.24456	3.73367	3.73367	4.97822	1.24456	1.24456	1.24456	0	0	1.24456	0	1.24456	0	2.48911	0	0	0	2.48911	0	0	0	8.71189	0
		85000-85999	3.73367	3.73367	2.48911	1.24456	3.73367	1.24456	0	6.22278	0	0	1.24456	1.24456	1.24456	1.24456	0	1.24456	2.48911	0	2.48911	1.24456	1.24456	1.24456	0	0	0	0	8.71189	2.48911	0	0	0	2.48911	0	0	1.24456	2.48911	0	3.73367	6.22278	1.24456	1.24456	1.24456	0	0	0	0	1.24456
		84000-84999	13.6901	16.1792	2.48911	7.46734	1.24456	2.48911	3.73367	1.24456	0	3.73367	1.24456	1.24456	2.48911	6.22278	6.22278	2.48911	0	8.71189	2.48911	2.48911	3.73367	0	3.73367	1.24456	0	0	3.73367	2.48911	1.24456	3.73367	1.24456	0	2.48911	1.24456	2.48911	0	0	4.97822	3.73367	1.24456	2.48911	1.24456	3.73367	7.46734	2.48911	1.24456	1.24456
		83000-83999	1.24456	0	2.48911	3.73367	2.48911	1.24456	2.48911	1.24456	1.24456	0	0	0	0	2.48911	1.24456	1.24456	0	0	2.48911	0	2.48911	2.48911	0	2.48911	0	1.24456	1.24456	0	1.24456	0	0	0	0	0	1.24456	0	0	0	0	4.97822	0	0	0	0	1.24456	4.97822	2.48911
		82000-82999	0	2.48911	3.73367	2.48911	9.95645	0	3.73367	7.46734	1.24456	2.48911	0	6.22278	3.73367	4.97822	0	0	1.24456	2.48911	0	0	6.22278	0	0	1.24456	0	0	0	2.48911	7.46734	2.48911	3.73367	11.201	2.48911	0	0	0	3.73367	2.48911	0	2.48911	0	0	0	2.48911	0	2.48911	16.1792
		81000-81999	0	1.24456	1.24456	0	1.24456	2.48911	1.24456	2.48911	2.48911	3.73367	0	0	0	0	0	0	0	4.97822	0	1.24456	0	0	1.24456	3.73367	1.24456	1.24456	0	1.24456	0	0	1.24456	0	3.73367	0	0	2.48911	0	0	0	1.24456	3.73367	0	0	0	1.24456	0	0
		80000-80999	2.48911	4.97822	2.48911	1.24456	0	1.24456	3.73367	0	0	0	1.24456	0	0	2.48911	3.73367	0	0	0	0	0	0	2.48911	4.97822	1.24456	0	0	0	0	0	2.48911	3.73367	1.24456	1.24456	1.24456	0	0	0	0	0	1.24456	0	0	6.22278	1.24456	7.46734	1.24456	4.97822
		79000-79999	0	2.48911	0	2.48911	0	0	0	0	0	1.24456	0	0	1.24456	2.48911	2.48911	3.73367	2.48911	2.48911	1.24456	1.24456	0	0	2.48911	1.24456	1.24456	1.24456	0	0	1.24456	0	1.24456	0	1.24456	1.24456	0	0	0	1.24456	0	1.24456	0	0	7.46734	0	1.24456	3.73367	0
		78000-78999	2.48911	0	3.73367	1.24456	7.46734	2.48911	3.73367	0	0	1.24456	0	0	0	0	1.24456	0	0	1.24456	4.97822	0	0	0	0	0	0	1.24456	3.73367	3.73367	1.24456	1.24456	0	1.24456	6.22278	1.24456	0	0	0	0	1.24456	0	0	0	0	0	1.24456	2.48911	1.24456
		77000-77999	0	0	0	1.24456	0	1.24456	1.24456	0	0	0	0	0	0	0	2.48911	3.73367	0	3.73367	2.48911	0	1.24456	3.73367	0	0	0	0	1.24456	1.24456	0	0	0	0	0	0	0	0	0	0	1.24456	2.48911	1.24456	0	0	1.24456	1.24456	0	0
		76000-76999	0	2.48911	0	2.48911	2.48911	1.24456	0	2.48911	1.24456	0	0	0	3.73367	0	0	0	1.24456	0	2.48911	0	0	0	1.24456	0	1.24456	1.24456	0	0	0	0	4.97822	0	0	0	1.24456	0	0	0	0	0	1.24456	0	2.48911	2.48911	0	0	0
		75000-75999	2.48911	0	1.24456	0	1.24456	3.73367	0	1.24456	0	6.22278	8.71189	2.48911	6.22278	0	2.48911	0	0	0	2.48911	0	0	1.24456	2.48911	0	2.48911	1.24456	1.24456	2.48911	0	1.24456	0	0	0	0	0	1.24456	0	1.24456	0	0	0	0	2.48911	3.73367	0	0	3.73367
		74000-74999	0	0	0	3.73367	0	0	2.48911	2.48911	1.24456	0	0	0	0	3.73367	2.48911	0	0	1.24456	1.24456	0	1.24456	0	0	0	0	0	2.48911	0	1.24456	0	0	0	0	0	0	0	1.24456	0	0	1.24456	0	0	0	0	2.48911	1.24456	0
		73000-73999	2.48911	0	0	0	1.24456	1.24456	0	2.48911	0	1.24456	0	0	0	1.24456	1.24456	0	0	1.24456	0	0	2.48911	2.48911	0	0	0	0	2.48911	0	3.73367	0	0	0	2.48911	1.24456	1.24456	1.24456	0	0	1.24456	3.73367	1.24456	0	1.24456	2.48911	0	0	0
		72000-72999	0	0	0	0	2.48911	0	0	1.24456	0	0	0	1.24456	0	0	9.95645	0	0	0	0	0	0	0	0	0	0	2.48911	0	0	0	0	0	0	1.24456	1.24456	0	2.48911	0	0	2.48911	2.48911	1.24456	2.48911	2.48911	0	1.24456	4.97822	0
		71000-71999	1.24456	0	2.48911	1.24456	2.48911	0	2.48911	6.22278	0	1.24456	0	1.24456	3.73367	1.24456	8.71189	0	1.24456	3.73367	1.24456	2.48911	1.24456	4.97822	4.97822	1.24456	0	0	4.97822	0	0	0	0	0	2.48911	2.48911	0	0	0	0	1.24456	1.24456	0	0	1.24456	0	0	4.97822	1.24456
		70000-70999	0	0	1.24456	1.24456	0	0	0	1.24456	0	1.24456	0	1.24456	1.24456	0	1.24456	0	0	1.24456	1.24456	0	0	0	3.73367	0	0	1.24456	0	0	0	0	0	0	2.48911	0	0	0	1.24456	0	0	0	0	1.24456	0	1.24456	0	0	8.71189
		69000-69999	0	0	0	0	0	1.24456	4.97822	1.24456	0	1.24456	0	0	0	0	0	1.24456	2.48911	1.24456	0	1.24456	0	2.48911	0	2.48911	0	1.24456	0	0	0	0	0	0	1.24456	0	0	0	0	1.24456	0	0	1.24456	0	0	2.48911	0	1.24456	0
		68000-68999	0	0	1.24456	4.97822	3.73367	16.1792	0	1.24456	1.24456	0	0	0	1.24456	0	2.48911	0	0	1.24456	0	1.24456	0	1.24456	0	1.24456	2.48911	1.24456	2.48911	1.24456	2.48911	1.24456	4.97822	0	0	0	1.24456	0	1.24456	3.73367	0	0	0	0	3.73367	1.24456	1.24456	1.24456	3.73367
		67000-67999	0	0	0	0	2.48911	1.24456	0	0	0	0	0	0	0	4.97822	0	1.24456	0	1.24456	1.24456	0	0	1.24456	0	0	1.24456	1.24456	3.73367	0	0	0	1.24456	0	0	0	0	0	0	0	0	0	0	0	1.24456	1.24456	0	1.24456	0
		66000-66999	3.73367	0	0	2.48911	3.73367	0	0	1.24456	0	3.73367	0	1.24456	0	0	0	1.24456	0	1.24456	2.48911	0	0	1.24456	0	1.24456	1.24456	0	1.24456	0	3.73367	0	1.24456	6.22278	1.24456	0	0	0	0	0	1.24456	0	0	0	3.73367	1.24456	1.24456	1.24456	2.48911
		65000-65999	2.48911	0	0	0	2.48911	0	0	13.6901	0	0	0	1.24456	0	3.73367	0	0	1.24456	0	2.48911	1.24456	0	1.24456	0	0	0	0	0	2.48911	1.24456	2.48911	0	3.73367	0	0	2.48911	0	0	2.48911	2.48911	2.48911	0	2.48911	4.97822	0	2.48911	3.73367	6.22278
		64000-64999	1.24456	0	0	0	2.48911	0	3.73367	0	0	3.73367	0	0	3.73367	2.48911	2.48911	0	0	0	0	0	1.24456	3.73367	2.48911	0	0	0	1.24456	1.24456	6.22278	2.48911	0	2.48911	0	0	1.24456	3.73367	1.24456	0	1.24456	1.24456	0	0	0	0	2.48911	1.24456	3.73367
		63000-63999	0	0	0	0	1.24456	1.24456	1.24456	1.24456	0	1.24456	1.24456	1.24456	0	1.24456	0	0	0	4.97822	0	0	2.48911	0	0	0	0	4.97822	0	0	1.24456	0	2.48911	0	0	0	1.24456	0	0	0	0	1.24456	0	0	0	2.48911	3.73367	0	4.97822
		62000-62999	0	0	1.24456	3.73367	0	0	8.71189	2.48911	0	0	0	0	2.48911	1.24456	4.97822	1.24456	1.24456	0	0	0	4.97822	0	1.24456	1.24456	1.24456	0	2.48911	0	0	3.73367	0	1.24456	6.22278	0	3.73367	0	1.24456	0	2.48911	1.24456	0	0	1.24456	0	7.46734	0	0
		61000-61999	1.24456	1.24456	0	0	0	0	2.48911	0	0	0	1.24456	0	0	1.24456	0	0	1.24456	0	0	0	0	1.24456	2.48911	0	0	0	1.24456	1.24456	0	0	0	1.24456	0	4.97822	0	1.24456	3.73367	1.24456	3.73367	1.24456	0	0	0	1.24456	1.24456	0	0
		60000-60999	0	0	0	0	1.24456	0	0	2.48911	0	1.24456	1.24456	0	0	1.24456	2.48911	1.24456	0	2.48911	0	0	0	0	0	0	0	0	1.24456	0	0	0	0	2.48911	0	1.24456	0	1.24456	1.24456	1.24456	0	0	1.24456	0	1.24456	0	0	0	1.24456
		59000-59999	0	1.24456	2.48911	0	3.73367	2.48911	0	1.24456	0	2.48911	0	0	0	6.22278	4.97822	0	0	2.48911	0	0	0	0	0	0	1.24456	2.48911	0	0	0	2.48911	6.22278	0	0	0	1.24456	0	1.24456	3.73367	0	0	0	1.24456	1.24456	1.24456	0	0	2.48911
		58000-58999	0	3.73367	0	0	2.48911	3.73367	0	1.24456	0	0	0	2.48911	0	2.48911	2.48911	0	0	1.24456	1.24456	1.24456	1.24456	0	0	0	2.48911	1.24456	1.24456	0	0	4.97822	6.22278	1.24456	2.48911	0	0	2.48911	1.24456	1.24456	1.24456	0	1.24456	0	1.24456	4.97822	2.48911	0	0
		57000-57999	2.48911	0	1.24456	0	0	0	0	0	0	0	0	0	0	0	0	0	0	0	0	1.24456	0	0	1.24456	1.24456	0	1.24456	0	0	0	0	0	0	0	1.24456	1.24456	0	3.73367	0	0	0	1.24456	0	0	0	0	0	1.24456
		56000-56999	0	0	3.73367	1.24456	1.24456	0	0	1.24456	2.48911	0	0	1.24456	0	1.24456	1.24456	0	0	1.24456	0	1.24456	0	0	2.48911	0	1.24456	0	0	0	1.24456	1.24456	1.24456	0	1.24456	0	0	0	0	0	0	0	0	0	2.48911	0	0	0	3.73367
		55000-55999	2.48911	0	0	0	0	0	0	0	0	0	0	2.48911	0	0	0	0	0	0	0	0	0	0	0	1.24456	0	1.24456	1.24456	0	2.48911	2.48911	0	1.24456	0	3.73367	1.24456	0	1.24456	1.24456	0	0	2.48911	0	1.24456	0	0	0	0
		54000-54999	0	0	1.24456	1.24456	2.48911	1.24456	0	0	0	0	0	0	0	0	7.46734	0	0	0	0	0	0	1.24456	1.24456	0	0	1.24456	0	0	0	0	2.48911	1.24456	0	0	6.22278	1.24456	1.24456	0	0	6.22278	0	0	0	1.24456	0	4.97822	0
		53000-53999	1.24456	0	0	0	1.24456	0	1.24456	0	0	0	0	1.24456	0	2.48911	0	0	0	0	1.24456	0	2.48911	0	1.24456	1.24456	0	0	0	0	0	1.24456	1.24456	1.24456	1.24456	0	1.24456	0	1.24456	0	0	1.24456	3.73367	2.48911	2.48911	0	1.24456	0	1.24456
		52000-52999	0	0	0	0	3.73367	0	0	0	0	0	0	2.48911	0	0	2.48911	0	0	2.48911	0	0	0	1.24456	0	1.24456	0	1.24456	0	0	0	0	0	3.73367	0	0	0	1.24456	1.24456	1.24456	0	0	0	0	0	3.73367	0	0	1.24456
		51000-51999	0	1.24456	0	0	0	0	2.48911	0	0	2.48911	0	0	1.24456	1.24456	0	2.48911	0	0	0	0	0	1.24456	0	0	0	0	0	0	0	0	0	6.22278	2.48911	0	0	0	0	1.24456	0	1.24456	0	22.402	0	0	1.24456	0	1.24456
		50000-50999	0	0	0	0	2.48911	1.24456	0	0	0	0	1.24456	0	0	1.24456	3.73367	2.48911	0	1.24456	1.24456	0	0	1.24456	1.24456	1.24456	0	0	1.24456	0	0	0	1.24456	3.73367	1.24456	0	0	0	1.24456	0	0	0	0	0	0	0	2.48911	1.24456	1.24456
		49000-49999	1.24456	2.48911	1.24456	1.24456	2.48911	0	0	1.24456	0	0	1.24456	0	0	2.48911	3.73367	3.73367	0	1.24456	0	1.24456	0	0	0	1.24456	1.24456	0	2.48911	1.24456	0	0	6.22278	2.48911	0	1.24456	2.48911	0	0	0	2.48911	0	2.48911	2.48911	4.97822	0	3.73367	1.24456	7.46734
		48000-48999	0	1.24456	0	0	1.24456	0	2.48911	0	0	3.73367	2.48911	1.24456	0	0	0	0	1.24456	0	1.24456	1.24456	3.73367	0	2.48911	0	2.48911	0	0	2.48911	1.24456	0	0	1.24456	0	0	0	0	2.48911	0	1.24456	2.48911	1.24456	0	0	0	0	1.24456	0
		47000-47999	0	0	0	0	0	1.24456	2.48911	1.24456	0	0	0	0	0	1.24456	0	0	0	0	0	0	0	0	0	0	0	0	2.48911	2.48911	0	0	0	0	0	0	1.24456	2.48911	0	1.24456	0	0	0	1.24456	0	0	0	2.48911	32.3585
		46000-46999	3.73367	0	0	2.48911	6.22278	0	1.24456	2.48911	0	1.24456	0	2.48911	1.24456	0	0	0	3.73367	0	0	0	0	0	0	1.24456	1.24456	0	0	1.24456	0	0	3.73367	2.48911	4.97822	0	0	0	2.48911	1.24456	0	0	0	1.24456	1.24456	0	4.97822	7.46734	126.945
		45000-45999	0	0	0	2.48911	1.24456	0	2.48911	0	2.48911	0	0	0	0	1.24456	0	0	0	0	0	0	3.73367	0	0	0	0	1.24456	0	0	6.22278	1.24456	3.73367	3.73367	3.73367	1.24456	1.24456	2.48911	0	1.24456	0	0	0	1.24456	1.24456	1.24456	19.9129	236.466
		44000-44999	1.24456	0	0	1.24456	2.48911	4.97822	1.24456	0	0	0	1.24456	0	1.24456	0	2.48911	1.24456	0	0	1.24456	3.73367	0	0	2.48911	3.73367	0	2.48911	3.73367	6.22278	0	1.24456	1.24456	1.24456	2.48911	1.24456	0	7.46734	0	7.46734	0	0	0	0	0	19.9129	160.548
		43000-43999	2.48911	2.48911	0	0	0	0	0	0	0	0	0	0	2.48911	1.24456	0	0	16.1792	4.97822	0	1.24456	1.24456	0	0	0	0	0	1.24456	0	1.24456	0	0	0	0	3.73367	0	1.24456	0	0	0	0	0	1.24456	8.71189	190.417
		42000-42999	0	2.48911	1.24456	0	1.24456	0	0	0	0	0	0	0	0	0	1.24456	1.24456	0	1.24456	1.24456	0	0	0	0	0	0	0	0	2.48911	0	1.24456	0	4.97822	0	0	0	0	0	1.24456	1.24456	0	0	12.4456	163.037
		41000-41999	0	0	1.24456	1.24456	0	1.24456	0	0	0	0	0	0	0	0	0	2.48911	0	2.48911	0	3.73367	0	0	0	0	3.73367	0	0	0	0	0	0	2.48911	0	0	0	1.24456	0	1.24456	2.48911	0	6.22278	186.683
		40000-40999	0	0	0	0	0	0	3.73367	1.24456	0	0	1.24456	0	0	0	0	0	0	0	0	0	0	0	0	1.24456	1.24456	0	0	0	0	0	0	0	1.24456	0	0	1.24456	0	6.22278	4.97822	19.9129	277.536
		39000-39999	0	1.24456	0	0	1.24456	1.24456	4.97822	0	0	0	1.24456	0	0	0	3.73367	1.24456	0	0	0	0	0	0	0	2.48911	2.48911	0	1.24456	0	0	0	0	0	3.73367	1.24456	1.24456	0	8.71189	2.48911	53.5159	184.194
		38000-38999	0	1.24456	0	1.24456	0	0	1.24456	0	0	0	0	0	0	0	0	0	0	1.24456	0	0	0	0	4.97822	0	1.24456	0	0	0	0	1.24456	0	0	0	1.24456	1.24456	0	0	6.22278	187.928
		37000-37999	0	0	0	0	0	1.24456	0	0	0	0	1.24456	1.24456	0	3.73367	3.73367	0	0	0	0	0	0	2.48911	0	2.48911	0	1.24456	0	0	0	2.48911	0	1.24456	1.24456	0	0	1.24456	11.201	161.792
		36000-36999	1.24456	0	1.24456	1.24456	0	0	0	0	0	0	0	0	0	0	1.24456	0	1.24456	0	0	0	0	1.24456	0	0	0	0	0	0	0	0	1.24456	0	2.48911	1.24456	0	21.1575	109.521
		35000-35999	0	0	0	2.48911	1.24456	0	1.24456	1.24456	0	0	0	0	0	0	0	0	2.48911	0	1.24456	0	0	1.24456	1.24456	1.24456	0	0	0	1.24456	2.48911	3.73367	7.46734	0	0	2.48911	13.6901	151.836
		34000-34999	0	3.73367	0	0	0	0	0	0	4.97822	0	0	0	0	1.24456	1.24456	0	0	0	0	0	1.24456	0	0	1.24456	0	1.24456	1.24456	0	2.48911	0	0	1.24456	1.24456	22.402	184.194
		33000-33999	1.24456	1.24456	1.24456	0	0	0	0	2.48911	1.24456	0	0	0	0	1.24456	3.73367	1.24456	0	0	0	0	0	0	1.24456	0	0	1.24456	0	0	0	0	0	1.24456	16.1792	116.988
		32000-32999	2.48911	1.24456	0	0	1.24456	0	0	0	0	0	3.73367	2.48911	0	0	1.24456	1.24456	0	0	0	0	1.24456	0	0	0	0	0	4.97822	0	2.48911	3.73367	1.24456	48.5377	220.286
		31000-31999	0	0	0	1.24456	0	0	0	0	0	1.24456	0	0	0	1.24456	0	1.24456	0	1.24456	0	0	0	0	0	1.24456	1.24456	1.24456	0	1.24456	0	2.48911	58.4941	113.255
		30000-30999	2.48911	0	1.24456	0	0	0	2.48911	2.48911	3.73367	0	0	0	0	0	2.48911	1.24456	1.24456	0	0	0	0	1.24456	1.24456	1.24456	0	1.24456	0	3.73367	2.48911	7.46734	172.993
		29000-29999	1.24456	0	0	0	1.24456	0	6.22278	2.48911	0	1.24456	0	1.24456	0	0	4.97822	0	0	1.24456	1.24456	0	0	0	1.24456	0	0	0	3.73367	1.24456	46.0486	172.993
		28000-28999	0	1.24456	1.24456	1.24456	1.24456	1.24456	1.24456	2.48911	0	0	0	3.73367	0	0	7.46734	0	0	0	0	0	1.24456	0	0	0	0	1.24456	2.48911	48.5377	216.553
		27000-27999	0	0	1.24456	0	0	2.48911	1.24456	2.48911	0	1.24456	0	2.48911	0	2.48911	0	0	1.24456	1.24456	0	0	0	0	0	0	2.48911	0	27.3802	256.379
		26000-26999	0	0	0	2.48911	3.73367	6.22278	0	6.22278	0	2.48911	0	2.48911	7.46734	0	1.24456	1.24456	0	0	1.24456	1.24456	1.24456	1.24456	1.24456	1.24456	4.97822	87.1189	319.851
		25000-25999	0	1.24456	0	1.24456	0	2.48911	0	2.48911	1.24456	0	0	0	1.24456	1.24456	0	1.24456	3.73367	0	0	1.24456	1.24456	0	0	1.24456	12.4456	282.514
		24000-24999	0	1.24456	0	1.24456	0	0	0	0	0	1.24456	0	0	0	0	6.22278	0	1.24456	2.48911	0	0	0	2.48911	2.48911	17.4238	230.243
		23000-23999	1.24456	4.97822	0	0	1.24456	0	2.48911	0	0	0	0	0	0	0	7.46734	2.48911	0	1.24456	0	0	0	0	14.9347	216.553
		22000-22999	1.24456	2.48911	0	8.71189	0	0	0	0	0	4.97822	0	0	0	2.48911	1.24456	0	0	0	2.48911	6.22278	3.73367	19.9129	231.487
		21000-21999	1.24456	1.24456	0	0	0	0	2.48911	0	2.48911	2.48911	1.24456	0	0	0	14.9347	0	1.24456	2.48911	0	0	11.201	204.107
		20000-20999	0	1.24456	0	1.24456	0	0	0	1.24456	0	0	0	1.24456	0	1.24456	0	1.24456	0	1.24456	1.24456	28.6248	278.781
		19000-19999	0	0	0	0	1.24456	0	0	0	1.24456	2.48911	0	2.48911	1.24456	0	0	2.48911	0	1.24456	23.6466	216.553
		18000-18999	4.97822	0	0	2.48911	1.24456	0	1.24456	2.48911	0	0	0	0	0	4.97822	1.24456	0	0	7.46734	266.335
		17000-17999	0	1.24456	0	0	7.46734	2.48911	0	0	0	0	0	0	0	1.24456	0	0	17.4238	200.374
		16000-16999	0	2.48911	0	1.24456	0	4.97822	0	0	0	0	0	6.22278	0	0	1.24456	18.6683	224.02
		15000-15999	0	0	1.24456	0	1.24456	0	0	0	1.24456	4.97822	0	0	0	1.24456	43.5595	185.439
		14000-14999	1.24456	0	1.24456	1.24456	1.24456	1.24456	1.24456	2.48911	1.24456	2.48911	0	6.22278	3.73367	16.1792	245.178
		13000-13999	1.24456	1.24456	2.48911	0	0	0	0	3.73367	0	0	1.24456	7.46734	13.6901	194.151
		12000-12999	0	0	0	0	4.97822	1.24456	3.73367	1.24456	1.24456	1.24456	1.24456	11.201	251.4
		11000-11999	2.48911	0	2.48911	0	3.73367	0	1.24456	0	0	1.24456	34.8476	211.575
		10000-10999	3.73367	0	1.24456	0	0	0	1.24456	0	1.24456	18.6683	306.161
		9000-9999	1.24456	0	4.97822	0	0	1.24456	2.48911	1.24456	17.4238	196.64
		8000-8999	0	0	0	2.48911	1.24456	0	0	37.3367	156.814
		7000-7999	1.24456	0	0	1.24456	3.73367	7.46734	28.6248	384.568
		6000-6999	0	3.73367	8.71189	2.48911	1.24456	4.97822	226.509
		5000-5999	0	0	2.48911	0	33.603	238.955
		4000-4999	0	1.24456	4.97822	41.0704	179.216
		3000-3999	1.24456	2.48911	41.0704	492.844
		2000-2999	0	26.1357	318.606
		1000-1999	34.8476	263.846
		0-999	235.221
[truncated: 82 more columns]
